# Supplementary material for: Proteomics of Plasma Membranes from Poplar Trees Reveals Tissue Distribution of Transporters, Receptors, and Proteins in Cell Wall Formation
Source: PubMed Central journal article supplement — Mol Cell Proteomics. 2009 Nov 28;9(2):368–87. doi: 10.1074/mcp.M900289-MCP200 (PMC2830847; doi:10.1074/mcp.m900289-mcp200), 2009-11-28
Supplement: supp_M900289-MCP200_Legend.pdf [file supp_M900289-MCP200_Legend.pdf]

## **SUPPLEMENTAL DATA**

Supplemental Table 2. Contains all integral proteins, both top rank and subset.

Supplemental Table 3. Contains all soluble top rank proteins.

Supplemental Table 4. Contains all single-peptide protein identifications and associated spectra.

Supplemental Table 5. Contains all peptides with a score above 25.

## **FIGURES**
