# Supplementary material for: Proteomics of Plasma Membranes from Poplar Trees Reveals Tissue Distribution of Transporters, Receptors, and Proteins in Cell Wall Formation
Source: PubMed Central journal article supplement — Mol Cell Proteomics. 2009 Nov 28;9(2):368–87. doi: 10.1074/mcp.M900289-MCP200 (PMC2830847; doi:10.1074/mcp.m900289-mcp200), 2009-11-28
Supplement: supp_M900289-MCP200_Supplemental_Table_4.pdf [file supp_M900289-MCP200_Supplemental_Table_4.pdf]

MS/MS Fragmentation of ID018 **MIVTAVGMR**

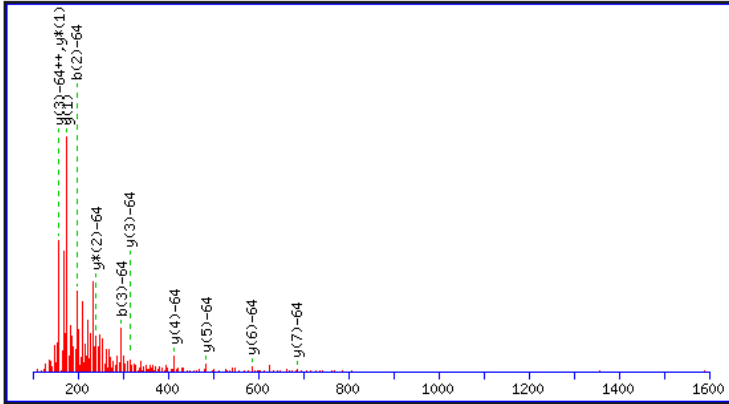

| # | <b>b</b>      | <b>b<sup>++</sup></b> | <b>b<sup>0</sup></b> | <b>b<sup>0++</sup></b> | <b>Seq.</b> | <b>y</b>      | <b>y<sup>++</sup></b> | <b>y<sup>*</sup></b> | <b>y<sup>+++</sup></b> | <b>y<sup>0</sup></b> | <b>y<sup>0++</sup></b> | # |
|---|---------------|-----------------------|----------------------|------------------------|-------------|---------------|-----------------------|----------------------|------------------------|----------------------|------------------------|---|
| 1 | 84.04         | 42.53                 |                      |                        | <b>M</b>    |               |                       |                      |                        |                      |                        | 9 |
| 2 | <b>197.13</b> | 99.07                 |                      |                        | <b>I</b>    | 798.48        | 399.75                | 781.46               | 391.23                 | 780.47               | 390.74                 | 8 |
| 3 | <b>296.20</b> | 148.60                |                      |                        | <b>V</b>    | <b>685.40</b> | 343.20                | 668.37               | 334.69                 | 667.39               | 334.20                 | 7 |
| 4 | 397.24        | 199.13                | 379.23               | 190.12                 | <b>T</b>    | <b>586.33</b> | 293.67                | 569.30               | 285.16                 | 568.32               | 284.66                 | 6 |
| 5 | 468.28        | 234.64                | 450.27               | 225.64                 | <b>A</b>    | <b>485.28</b> | 243.15                | 468.26               | 234.63                 |                      |                        | 5 |
| 6 | 567.35        | 284.18                | 549.34               | 275.17                 | <b>V</b>    | <b>414.25</b> | 207.63                | 397.22               | 199.11                 |                      |                        | 4 |
| 7 | 624.37        | 312.69                | 606.36               | 303.68                 | <b>G</b>    | <b>315.18</b> | <b>158.09</b>         | 298.15               | 149.58                 |                      |                        | 3 |
| 8 | 707.41        | 354.21                | 689.40               | 345.20                 | <b>M</b>    | 258.16        | 129.58                | <b>241.13</b>        | 121.07                 |                      |                        | 2 |
| 9 |               |                       |                      |                        | <b>R</b>    | <b>175.12</b> | 88.06                 | <b>158.09</b>        | 79.55                  |                      |                        | 1 |

MS/MS Fragmentation of ID020 **LLLQALR**

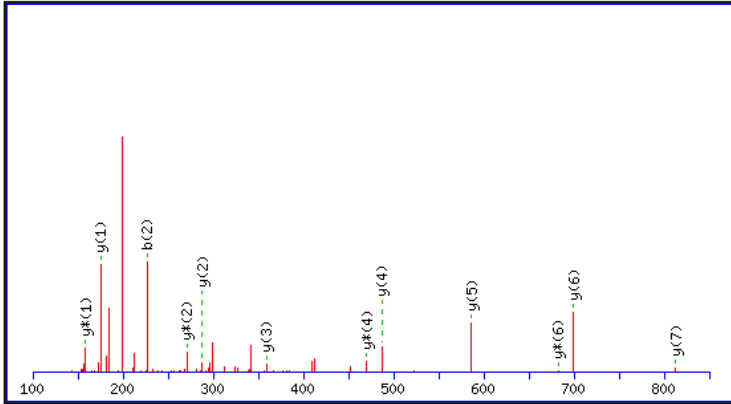

| #        | <b>b</b>      | <b>b<sup>++</sup></b> | <b>b*</b> | <b>b<sup>*++</sup></b> | Seq.     | <b>y</b>      | <b>y<sup>++</sup></b> | <b>y*</b>     | <b>y<sup>*++</sup></b> | #        |
|----------|---------------|-----------------------|-----------|------------------------|----------|---------------|-----------------------|---------------|------------------------|----------|
| <b>1</b> | 114.09        | 57.55                 |           |                        | <b>L</b> |               |                       |               |                        | <b>8</b> |
| <b>2</b> | <b>227.18</b> | 114.09                |           |                        | <b>L</b> | <b>812.54</b> | 406.77                | 795.51        | 398.26                 | <b>7</b> |
| <b>3</b> | 340.26        | 170.63                |           |                        | <b>L</b> | <b>699.45</b> | 350.23                | <b>682.42</b> | 341.72                 | <b>6</b> |
| <b>4</b> | 439.33        | 220.17                |           |                        | <b>V</b> | <b>586.37</b> | 293.69                | 569.34        | 285.17                 | <b>5</b> |
| <b>5</b> | 567.39        | 284.20                | 550.36    | 275.68                 | <b>Q</b> | <b>487.30</b> | 244.15                | <b>470.27</b> | 235.64                 | <b>4</b> |
| <b>6</b> | 638.42        | 319.72                | 621.40    | 311.20                 | <b>A</b> | <b>359.24</b> | 180.12                | 342.21        | 171.61                 | <b>3</b> |
| <b>7</b> | 751.51        | 376.26                | 734.48    | 367.74                 | <b>L</b> | <b>288.20</b> | 144.61                | <b>271.18</b> | 136.09                 | <b>2</b> |
| <b>8</b> |               |                       |           |                        | <b>R</b> | <b>175.12</b> | 88.06                 | <b>158.09</b> | 79.55                  | <b>1</b> |

MS/MS Fragmentation of ID024 **NLILLGATAVEDK**

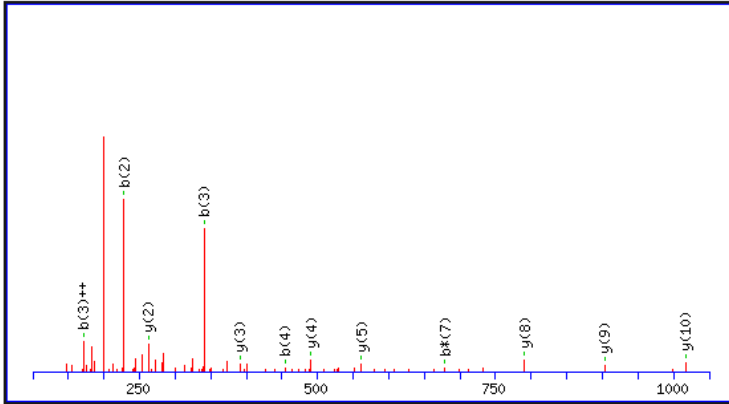

| #         | <b>b</b>      | <b>b<sup>++</sup></b> | <b>b*</b>     | <b>b<sup>+++</sup></b> | <b>b<sup>0</sup></b> | <b>b<sup>0++</sup></b> | Seq.     | <b>y</b>       | <b>y<sup>++</sup></b> | <b>y*</b> | <b>y<sup>+++</sup></b> | <b>y<sup>0</sup></b> | <b>y<sup>0++</sup></b> | #         |
|-----------|---------------|-----------------------|---------------|------------------------|----------------------|------------------------|----------|----------------|-----------------------|-----------|------------------------|----------------------|------------------------|-----------|
| <b>1</b>  | 115.05        | 58.03                 | 98.02         | 49.52                  |                      |                        | <b>N</b> |                |                       |           |                        |                      |                        | <b>13</b> |
| <b>2</b>  | <b>228.13</b> | 114.57                | 211.11        | 106.06                 |                      |                        | <b>L</b> | 1242.73        | 621.87                | 1225.70   | 613.36                 | 1224.72              | 612.86                 | <b>12</b> |
| <b>3</b>  | <b>341.22</b> | <b>171.11</b>         | 324.19        | 162.60                 |                      |                        | <b>I</b> | 1129.65        | 565.33                | 1112.62   | 556.81                 | 1111.64              | 556.32                 | <b>11</b> |
| <b>4</b>  | <b>454.30</b> | 227.65                | 437.28        | 219.14                 |                      |                        | <b>L</b> | <b>1016.56</b> | 508.78                | 999.54    | 500.27                 | 998.55               | 499.78                 | <b>10</b> |
| <b>5</b>  | 567.39        | 284.20                | 550.36        | 275.68                 |                      |                        | <b>L</b> | <b>903.48</b>  | 452.24                | 886.45    | 443.73                 | 885.47               | 443.24                 | <b>9</b>  |
| <b>6</b>  | 624.41        | 312.71                | 607.38        | 304.19                 |                      |                        | <b>G</b> | <b>790.39</b>  | 395.70                | 773.37    | 387.19                 | 772.38               | 386.70                 | <b>8</b>  |
| <b>7</b>  | 695.45        | 348.23                | <b>678.42</b> | 339.71                 |                      |                        | <b>A</b> | 733.37         | 367.19                | 716.35    | 358.68                 | 715.36               | 358.18                 | <b>7</b>  |
| <b>8</b>  | 796.49        | 398.75                | 779.47        | 390.24                 | 778.48               | 389.74                 | <b>T</b> | 662.34         | 331.67                | 645.31    | 323.16                 | 644.32               | 322.67                 | <b>6</b>  |
| <b>9</b>  | 867.53        | 434.27                | 850.50        | 425.76                 | 849.52               | 425.26                 | <b>A</b> | <b>561.29</b>  | 281.15                | 544.26    | 272.63                 | 543.28               | 272.14                 | <b>5</b>  |
| <b>10</b> | 966.60        | 483.80                | 949.57        | 475.29                 | 948.59               | 474.80                 | <b>V</b> | <b>490.25</b>  | 245.63                | 473.22    | 237.12                 | 472.24               | 236.62                 | <b>4</b>  |
| <b>11</b> | 1095.64       | 548.32                | 1078.61       | 539.81                 | 1077.63              | 539.32                 | <b>E</b> | <b>391.18</b>  | 196.09                | 374.16    | 187.58                 | 373.17               | 187.09                 | <b>3</b>  |
| <b>12</b> | 1210.67       | 605.84                | 1193.64       | 597.32                 | 1192.66              | 596.83                 | <b>D</b> | <b>262.14</b>  | 131.57                | 245.11    | 123.06                 | 244.13               | 122.57                 | <b>2</b>  |
| <b>13</b> |               |                       |               |                        |                      |                        | <b>K</b> | 147.11         | 74.06                 | 130.09    | 65.55                  |                      |                        | <b>1</b>  |

MS/MS Fragmentation of ID032 **IVQEALDR**

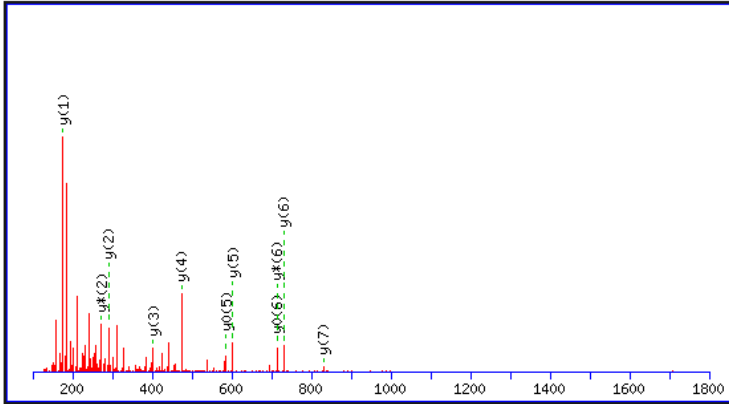

| #        | <b>b</b> | <b>b<sup>++</sup></b> | <b>b<sup>*</sup></b> | <b>b<sup>*++</sup></b> | <b>b<sup>0</sup></b> | <b>b<sup>0++</sup></b> | Seq.     | <b>y</b>      | <b>y<sup>++</sup></b> | <b>y<sup>*</sup></b> | <b>y<sup>*++</sup></b> | <b>y<sup>0</sup></b> | <b>y<sup>0++</sup></b> | #        |
|----------|----------|-----------------------|----------------------|------------------------|----------------------|------------------------|----------|---------------|-----------------------|----------------------|------------------------|----------------------|------------------------|----------|
| <b>1</b> | 114.09   | 57.55                 |                      |                        |                      |                        | <b>I</b> |               |                       |                      |                        |                      |                        | <b>8</b> |
| <b>2</b> | 213.16   | 107.08                |                      |                        |                      |                        | <b>V</b> | <b>830.44</b> | 415.72                | 813.41               | 407.21                 | 812.43               | 406.72                 | <b>7</b> |
| <b>3</b> | 341.22   | 171.11                | 324.19               | 162.60                 |                      |                        | <b>Q</b> | <b>731.37</b> | 366.19                | <b>714.34</b>        | 357.67                 | <b>713.36</b>        | 357.18                 | <b>6</b> |
| <b>4</b> | 470.26   | 235.63                | 453.23               | 227.12                 | 452.25               | 226.63                 | <b>E</b> | <b>603.31</b> | 302.16                | 586.28               | 293.65                 | <b>585.30</b>        | 293.15                 | <b>5</b> |
| <b>5</b> | 541.30   | 271.15                | 524.27               | 262.64                 | 523.29               | 262.15                 | <b>A</b> | <b>474.27</b> | 237.64                | 457.24               | 229.12                 | 456.26               | 228.63                 | <b>4</b> |
| <b>6</b> | 654.38   | 327.69                | 637.36               | 319.18                 | 636.37               | 318.69                 | <b>L</b> | <b>403.23</b> | 202.12                | 386.20               | 193.61                 | 385.22               | 193.11                 | <b>3</b> |
| <b>7</b> | 769.41   | 385.21                | 752.38               | 376.69                 | 751.40               | 376.20                 | <b>D</b> | <b>290.15</b> | 145.58                | <b>273.12</b>        | 137.06                 | 272.14               | 136.57                 | <b>2</b> |
| <b>8</b> |          |                       |                      |                        |                      |                        | <b>R</b> | <b>175.12</b> | 88.06                 | 158.09               | 79.55                  |                      |                        | <b>1</b> |



MS/MS Fragmentation of ID042 **DADSIAVIQHGR**

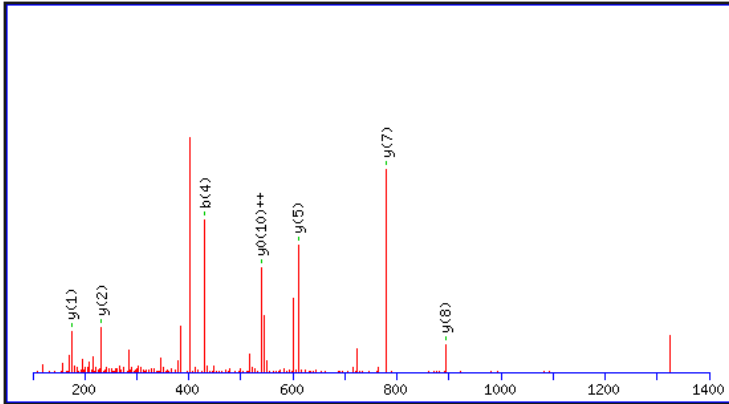

| #  | b       | b <sup>++</sup> | b <sup>*</sup> | b <sup>*++</sup> | b <sup>0</sup> | b <sup>0++</sup> | Seq. | y       | y <sup>++</sup> | y <sup>*</sup> | y <sup>*++</sup> | y <sup>0</sup> | y <sup>0++</sup> | #  |
|----|---------|-----------------|----------------|------------------|----------------|------------------|------|---------|-----------------|----------------|------------------|----------------|------------------|----|
| 1  | 158.04  | 79.53           |                |                  | 140.03         | 70.52            | D    |         |                 |                |                  |                |                  | 12 |
| 2  | 229.08  | 115.04          |                |                  | 211.07         | 106.04           | A    | 1166.63 | 583.82          | 1149.60        | 575.30           | 1148.62        | 574.81           | 11 |
| 3  | 344.11  | 172.56          |                |                  | 326.10         | 163.55           | D    | 1095.59 | 548.30          | 1078.56        | 539.79           | 1077.58        | 539.29           | 10 |
| 4  | 431.14  | 216.07          |                |                  | 413.13         | 207.07           | S    | 980.56  | 490.79          | 963.54         | 482.27           | 962.55         | 481.78           | 9  |
| 5  | 544.22  | 272.62          |                |                  | 526.21         | 263.61           | I    | 893.53  | 447.27          | 876.50         | 438.76           |                |                  | 8  |
| 6  | 615.26  | 308.13          |                |                  | 597.25         | 299.13           | A    | 780.45  | 390.73          | 763.42         | 382.21           |                |                  | 7  |
| 7  | 714.33  | 357.67          |                |                  | 696.32         | 348.66           | V    | 709.41  | 355.21          | 692.38         | 346.70           |                |                  | 6  |
| 8  | 827.41  | 414.21          |                |                  | 809.40         | 405.21           | I    | 610.34  | 305.67          | 593.32         | 297.16           |                |                  | 5  |
| 9  | 955.47  | 478.24          | 938.45         | 469.73           | 937.46         | 469.23           | Q    | 497.26  | 249.13          | 480.23         | 240.62           |                |                  | 4  |
| 10 | 1092.53 | 546.77          | 1075.51        | 538.26           | 1074.52        | 537.76           | H    | 369.20  | 185.10          | 352.17         | 176.59           |                |                  | 3  |
| 11 | 1149.55 | 575.28          | 1132.53        | 566.77           | 1131.54        | 566.28           | G    | 232.14  | 116.57          | 215.11         | 108.06           |                |                  | 2  |
| 12 |         |                 |                |                  |                |                  | R    | 175.12  | 88.06           | 158.09         | 79.55            |                |                  | 1  |

MS/MS Fragmentation of ID044 **VMIDGIDIK**

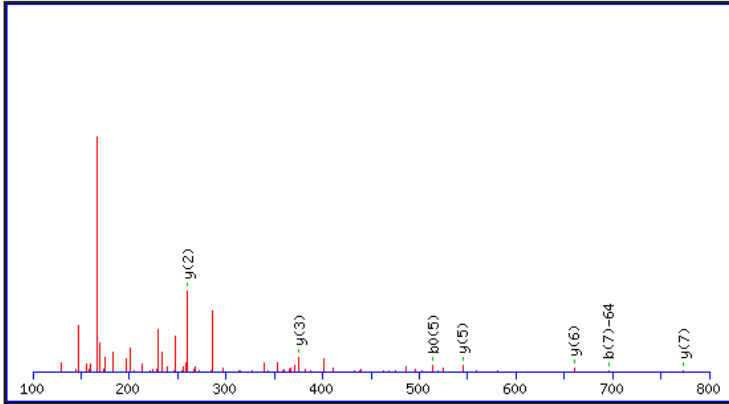

| #        | <b>b</b>      | <b>b<sup>++</sup></b> | <b>b<sup>0</sup></b> | <b>b<sup>0++</sup></b> | <b>Seq.</b> | <b>y</b>      | <b>y<sup>++</sup></b> | <b>y<sup>*</sup></b> | <b>y<sup>+++</sup></b> | <b>y<sup>0</sup></b> | <b>y<sup>0++</sup></b> | #        |
|----------|---------------|-----------------------|----------------------|------------------------|-------------|---------------|-----------------------|----------------------|------------------------|----------------------|------------------------|----------|
| <b>1</b> | 100.08        | 50.54                 |                      |                        | <b>V</b>    |               |                       |                      |                        |                      |                        | <b>9</b> |
| <b>2</b> | 183.11        | 92.06                 |                      |                        | <b>M</b>    | 856.48        | 428.74                | 839.45               | 420.23                 | 838.47               | 419.74                 | <b>8</b> |
| <b>3</b> | 296.20        | 148.60                |                      |                        | <b>I</b>    | <b>773.44</b> | 387.22                | 756.41               | 378.71                 | 755.43               | 378.22                 | <b>7</b> |
| <b>4</b> | 411.22        | 206.12                | 393.21               | 197.11                 | <b>D</b>    | <b>660.36</b> | 330.68                | 643.33               | 322.17                 | 642.35               | 321.68                 | <b>6</b> |
| <b>5</b> | 468.25        | 234.63                | 450.23               | 225.62                 | <b>G</b>    | <b>545.33</b> | 273.17                | 528.30               | 264.66                 | 527.32               | 264.16                 | <b>5</b> |
| <b>6</b> | 581.33        | 291.17                | 563.32               | 282.16                 | <b>I</b>    | 488.31        | 244.66                | 471.28               | 236.14                 | 470.30               | 235.65                 | <b>4</b> |
| <b>7</b> | <b>696.36</b> | 348.68                | 678.35               | 339.68                 | <b>D</b>    | <b>375.22</b> | 188.12                | 358.20               | 179.60                 | 357.21               | 179.11                 | <b>3</b> |
| <b>8</b> | 809.44        | 405.22                | 791.43               | 396.22                 | <b>I</b>    | <b>260.20</b> | 130.60                | 243.17               | 122.09                 |                      |                        | <b>2</b> |
| <b>9</b> |               |                       |                      |                        | <b>K</b>    | 147.11        | 74.06                 | 130.09               | 65.55                  |                      |                        | <b>1</b> |

MS/MS Fragmentation of ID048 **TLLNLIGGR**

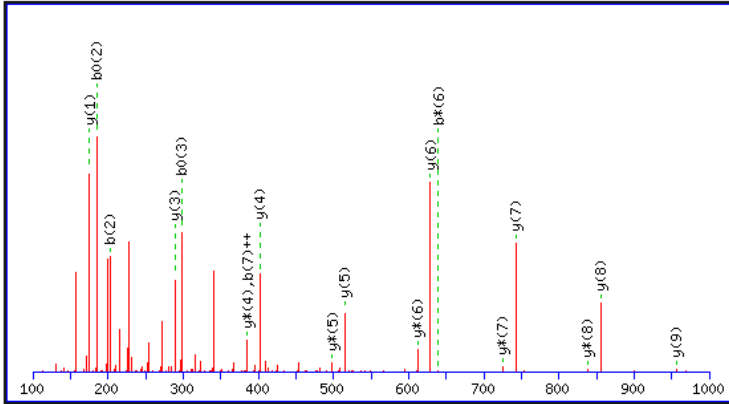

| #         | <b>b</b>      | <b>b<sup>++</sup></b> | <b>b<sup>*</sup></b> | <b>b<sup>*++</sup></b> | <b>b<sup>0</sup></b> | <b>b<sup>0++</sup></b> | Seq.     | <b>y</b>      | <b>y<sup>++</sup></b> | <b>y<sup>*</sup></b> | <b>y<sup>*++</sup></b> | <b>y<sup>0</sup></b> | <b>y<sup>0++</sup></b> | #         |
|-----------|---------------|-----------------------|----------------------|------------------------|----------------------|------------------------|----------|---------------|-----------------------|----------------------|------------------------|----------------------|------------------------|-----------|
| <b>1</b>  | 102.05        | 51.53                 |                      |                        | 84.04                | 42.53                  | <b>T</b> |               |                       |                      |                        |                      |                        | <b>10</b> |
| <b>2</b>  | <b>203.10</b> | 102.05                |                      |                        | <b>185.09</b>        | 93.05                  | <b>T</b> | <b>956.59</b> | 478.80                | 939.56               | 470.28                 | 938.58               | 469.79                 | <b>9</b>  |
| <b>3</b>  | 316.19        | 158.60                |                      |                        | <b>298.18</b>        | 149.59                 | <b>L</b> | <b>855.54</b> | 428.27                | <b>838.51</b>        | 419.76                 |                      |                        | <b>8</b>  |
| <b>4</b>  | 429.27        | 215.14                |                      |                        | 411.26               | 206.13                 | <b>L</b> | <b>742.46</b> | 371.73                | <b>725.43</b>        | 363.22                 |                      |                        | <b>7</b>  |
| <b>5</b>  | 543.31        | 272.16                | 526.29               | 263.65                 | 525.30               | 263.16                 | <b>N</b> | <b>629.37</b> | 315.19                | <b>612.35</b>        | 306.68                 |                      |                        | <b>6</b>  |
| <b>6</b>  | 656.40        | 328.70                | <b>639.37</b>        | 320.19                 | 638.39               | 319.70                 | <b>L</b> | <b>515.33</b> | 258.17                | <b>498.30</b>        | 249.66                 |                      |                        | <b>5</b>  |
| <b>7</b>  | 769.48        | <b>385.24</b>         | 752.46               | 376.73                 | 751.47               | 376.24                 | <b>I</b> | <b>402.25</b> | 201.63                | <b>385.22</b>        | 193.11                 |                      |                        | <b>4</b>  |
| <b>8</b>  | 826.50        | 413.76                | 809.48               | 405.24                 | 808.49               | 404.75                 | <b>G</b> | <b>289.16</b> | 145.08                | 272.14               | 136.57                 |                      |                        | <b>3</b>  |
| <b>9</b>  | 883.52        | 442.27                | 866.50               | 433.75                 | 865.51               | 433.26                 | <b>G</b> | 232.14        | 116.57                | 215.11               | 108.06                 |                      |                        | <b>2</b>  |
| <b>10</b> |               |                       |                      |                        |                      |                        | <b>R</b> | <b>175.12</b> | 88.06                 | 158.09               | 79.55                  |                      |                        | <b>1</b>  |

MS/MS Fragmentation of ID051 **TTLIDLALGR**

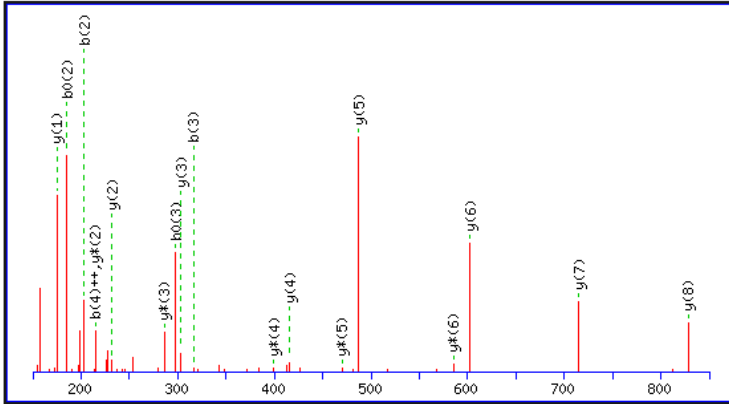

| #         | <b>b</b>      | <b>b<sup>++</sup></b> | <b>b<sup>0</sup></b> | <b>b<sup>0++</sup></b> | Seq.     | <b>y</b>      | <b>y<sup>++</sup></b> | <b>y<sup>*</sup></b> | <b>y<sup>*++</sup></b> | <b>y<sup>0</sup></b> | <b>y<sup>0++</sup></b> | #         |
|-----------|---------------|-----------------------|----------------------|------------------------|----------|---------------|-----------------------|----------------------|------------------------|----------------------|------------------------|-----------|
| <b>1</b>  | 102.05        | 51.53                 | 84.04                | 42.53                  | <b>T</b> |               |                       |                      |                        |                      |                        | <b>10</b> |
| <b>2</b>  | <b>203.10</b> | 102.05                | <b>185.09</b>        | 93.05                  | <b>T</b> | 929.54        | 465.27                | 912.51               | 456.76                 | 911.53               | 456.27                 | <b>9</b>  |
| <b>3</b>  | <b>316.19</b> | 158.60                | <b>298.18</b>        | 149.59                 | <b>L</b> | <b>828.49</b> | 414.75                | 811.47               | 406.24                 | 810.48               | 405.75                 | <b>8</b>  |
| <b>4</b>  | 429.27        | <b>215.14</b>         | 411.26               | 206.13                 | <b>L</b> | <b>715.41</b> | 358.21                | 698.38               | 349.70                 | 697.40               | 349.20                 | <b>7</b>  |
| <b>5</b>  | 544.30        | 272.65                | 526.29               | 263.65                 | <b>D</b> | <b>602.33</b> | 301.67                | <b>585.30</b>        | 293.15                 | 584.32               | 292.66                 | <b>6</b>  |
| <b>6</b>  | 615.33        | 308.17                | 597.32               | 299.17                 | <b>A</b> | <b>487.30</b> | 244.15                | <b>470.27</b>        | 235.64                 |                      |                        | <b>5</b>  |
| <b>7</b>  | 728.42        | 364.71                | 710.41               | 355.71                 | <b>L</b> | <b>416.26</b> | 208.63                | <b>399.24</b>        | 200.12                 |                      |                        | <b>4</b>  |
| <b>8</b>  | 799.46        | 400.23                | 781.45               | 391.23                 | <b>A</b> | <b>303.18</b> | 152.09                | <b>286.15</b>        | 143.58                 |                      |                        | <b>3</b>  |
| <b>9</b>  | 856.48        | 428.74                | 838.47               | 419.74                 | <b>G</b> | <b>232.14</b> | 116.57                | <b>215.11</b>        | 108.06                 |                      |                        | <b>2</b>  |
| <b>10</b> |               |                       |                      |                        | <b>R</b> | <b>175.12</b> | 88.06                 | 158.09               | 79.55                  |                      |                        | <b>1</b>  |

MS/MS Fragmentation of ID053 **TTLMDVLAGR**

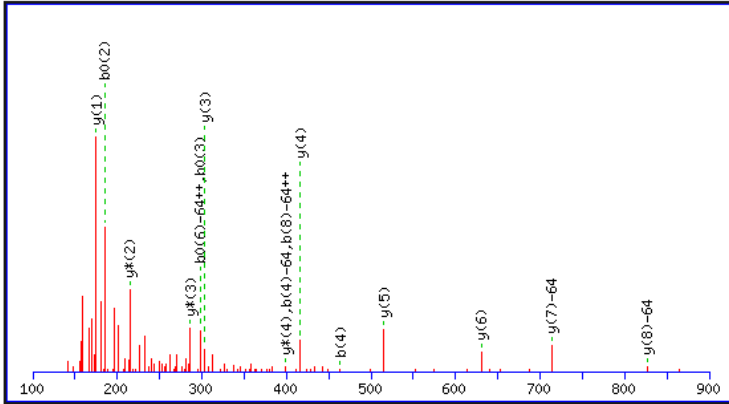

| #  | b      | b <sup>++</sup> | b <sup>0</sup> | b <sup>0++</sup> | Seq. | y      | y <sup>++</sup> | y*     | y <sup>*++</sup> | y <sup>0</sup> | y <sup>0++</sup> | #  |
|----|--------|-----------------|----------------|------------------|------|--------|-----------------|--------|------------------|----------------|------------------|----|
| 1  | 102.05 | 51.53           | 84.04          | 42.53            | T    |        |                 |        |                  |                |                  | 10 |
| 2  | 203.10 | 102.05          | 185.09         | 93.05            | T    | 927.53 | 464.27          | 910.50 | 455.75           | 909.52         | 455.26           | 9  |
| 3  | 316.19 | 158.60          | 298.18         | 149.59           | L    | 826.48 | 413.74          | 809.45 | 405.23           | 808.47         | 404.74           | 8  |
| 4  | 399.22 | 200.12          | 381.21         | 191.11           | M    | 713.39 | 357.20          | 696.37 | 348.69           | 695.38         | 348.20           | 7  |
| 5  | 514.25 | 257.63          | 496.24         | 248.62           | D    | 630.36 | 315.68          | 613.33 | 307.17           | 612.35         | 306.68           | 6  |
| 6  | 613.32 | 307.16          | 595.31         | 298.16           | V    | 515.33 | 258.17          | 498.30 | 249.66           |                |                  | 5  |
| 7  | 726.40 | 363.71          | 708.39         | 354.70           | L    | 416.26 | 208.63          | 399.24 | 200.12           |                |                  | 4  |
| 8  | 797.44 | 399.22          | 779.43         | 390.22           | A    | 303.18 | 152.09          | 286.15 | 143.58           |                |                  | 3  |
| 9  | 854.46 | 427.73          | 836.45         | 418.73           | G    | 232.14 | 116.57          | 215.11 | 108.06           |                |                  | 2  |
| 10 |        |                 |                |                  | R    | 175.12 | 88.06           | 158.09 | 79.55            |                |                  | 1  |

MS/MS Fragmentation of ID054 **TTLMDVLAGR**



| #  | b      | b <sup>++</sup> | b <sup>0</sup> | b <sup>0++</sup> | Seq. | y      | y <sup>++</sup> | y <sup>*</sup> | y <sup>*++</sup> | y <sup>0</sup> | y <sup>0++</sup> | #  |
|----|--------|-----------------|----------------|------------------|------|--------|-----------------|----------------|------------------|----------------|------------------|----|
| 1  | 102.05 | 51.53           | 84.04          | 42.53            | T    |        |                 |                |                  |                |                  | 10 |
| 2  | 203.10 | 102.05          | 185.09         | 93.05            | T    | 927.53 | 464.27          | 910.50         | 455.75           | 909.52         | 455.26           | 9  |
| 3  | 316.19 | 158.60          | 298.18         | 149.59           | L    | 826.48 | 413.74          | 809.45         | 405.23           | 808.47         | 404.74           | 8  |
| 4  | 399.22 | 200.12          | 381.21         | 191.11           | M    | 713.39 | 357.20          | 696.37         | 348.69           | 695.38         | 348.20           | 7  |
| 5  | 514.25 | 257.63          | 496.24         | 248.62           | D    | 630.36 | 315.68          | 613.33         | 307.17           | 612.35         | 306.68           | 6  |
| 6  | 613.32 | 307.16          | 595.31         | 298.16           | V    | 515.33 | 258.17          | 498.30         | 249.66           |                |                  | 5  |
| 7  | 726.40 | 363.71          | 708.39         | 354.70           | L    | 416.26 | 208.63          | 399.24         | 200.12           |                |                  | 4  |
| 8  | 797.44 | 399.22          | 779.43         | 390.22           | A    | 303.18 | 152.09          | 286.15         | 143.58           |                |                  | 3  |
| 9  | 854.46 | 427.73          | 836.45         | 418.73           | G    | 232.14 | 116.57          | 215.11         | 108.06           |                |                  | 2  |
| 10 |        |                 |                |                  | R    | 175.12 | 88.06           | 158.09         | 79.55            |                |                  | 1  |

MS/MS Fragmentation of ID069 **STLIQAIFR**

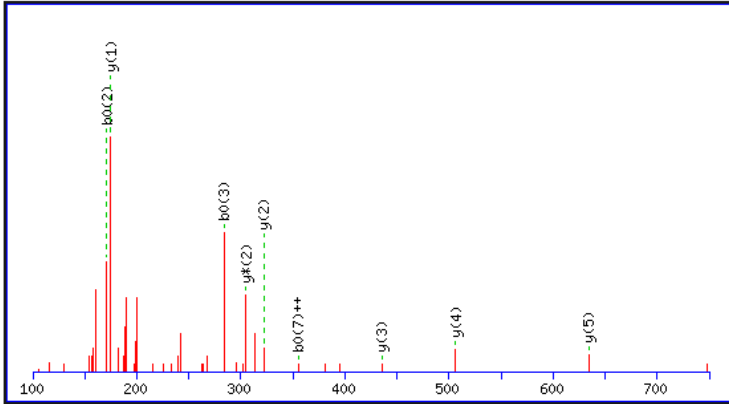

| #        | <b>b</b> | <b>b<sup>++</sup></b> | <b>b<sup>*</sup></b> | <b>b<sup>*++</sup></b> | <b>b<sup>0</sup></b> | <b>b<sup>0++</sup></b> | Seq.     | <b>y</b>      | <b>y<sup>++</sup></b> | <b>y<sup>*</sup></b> | <b>y<sup>*++</sup></b> | <b>y<sup>0</sup></b> | <b>y<sup>0++</sup></b> | #        |
|----------|----------|-----------------------|----------------------|------------------------|----------------------|------------------------|----------|---------------|-----------------------|----------------------|------------------------|----------------------|------------------------|----------|
| <b>1</b> | 88.04    | 44.52                 |                      |                        | 70.03                | 35.52                  | <b>S</b> |               |                       |                      |                        |                      |                        | <b>9</b> |
| <b>2</b> | 189.09   | 95.05                 |                      |                        | <b>171.08</b>        | 86.04                  | <b>T</b> | 961.58        | 481.30                | 944.56               | 472.78                 | 943.57               | 472.29                 | <b>8</b> |
| <b>3</b> | 302.17   | 151.59                |                      |                        | <b>284.16</b>        | 142.58                 | <b>L</b> | 860.54        | 430.77                | 843.51               | 422.26                 |                      |                        | <b>7</b> |
| <b>4</b> | 415.26   | 208.13                |                      |                        | 397.24               | 199.13                 | <b>I</b> | 747.45        | 374.23                | 730.42               | 365.72                 |                      |                        | <b>6</b> |
| <b>5</b> | 543.31   | 272.16                | 526.29               | 263.65                 | 525.30               | 263.16                 | <b>Q</b> | <b>634.37</b> | 317.69                | 617.34               | 309.17                 |                      |                        | <b>5</b> |
| <b>6</b> | 614.35   | 307.68                | 597.32               | 299.17                 | 596.34               | 298.67                 | <b>A</b> | <b>506.31</b> | 253.66                | 489.28               | 245.14                 |                      |                        | <b>4</b> |
| <b>7</b> | 727.43   | 364.22                | 710.41               | 355.71                 | 709.42               | <b>355.22</b>          | <b>I</b> | <b>435.27</b> | 218.14                | 418.24               | 209.63                 |                      |                        | <b>3</b> |
| <b>8</b> | 874.50   | 437.76                | 857.48               | 429.24                 | 856.49               | 428.75                 | <b>F</b> | <b>322.19</b> | 161.60                | <b>305.16</b>        | 153.08                 |                      |                        | <b>2</b> |
| <b>9</b> |          |                       |                      |                        |                      |                        | <b>R</b> | <b>175.12</b> | 88.06                 | 158.09               | 79.55                  |                      |                        | <b>1</b> |

MS/MS Fragmentation of ID070 **TTLIGALFR**

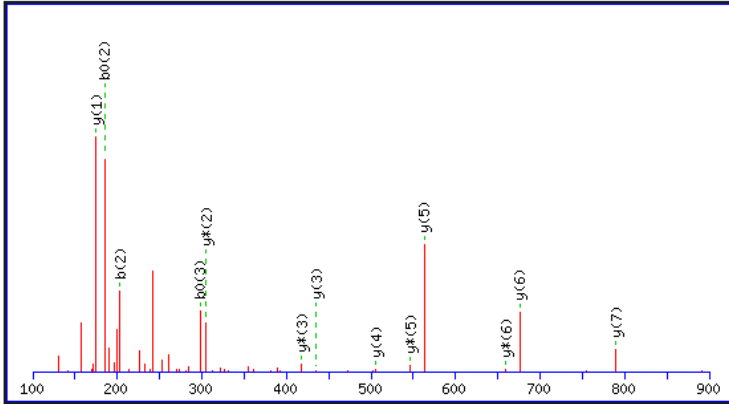

| # | <b>b</b>      | <b>b<sup>++</sup></b> | <b>b<sup>0</sup></b> | <b>b<sup>0++</sup></b> | <b>Seq.</b> | <b>y</b>      | <b>y<sup>++</sup></b> | <b>y<sup>*</sup></b> | <b>y<sup>***</sup></b> | <b>y<sup>0</sup></b> | <b>y<sup>0++</sup></b> | # |
|---|---------------|-----------------------|----------------------|------------------------|-------------|---------------|-----------------------|----------------------|------------------------|----------------------|------------------------|---|
| 1 | 102.05        | 51.53                 | 84.04                | 42.53                  | <b>T</b>    |               |                       |                      |                        |                      |                        | 9 |
| 2 | <b>203.10</b> | 102.05                | <b>185.09</b>        | 93.05                  | <b>T</b>    | 890.55        | 445.78                | 873.52               | 437.26                 | 872.54               | 436.77                 | 8 |
| 3 | 316.19        | 158.60                | <b>298.18</b>        | 149.59                 | <b>L</b>    | <b>789.50</b> | 395.25                | 772.47               | 386.74                 |                      |                        | 7 |
| 4 | 429.27        | 215.14                | 411.26               | 206.13                 | <b>I</b>    | <b>676.41</b> | 338.71                | <b>659.39</b>        | 330.20                 |                      |                        | 6 |
| 5 | 486.29        | 243.65                | 468.28               | 234.64                 | <b>G</b>    | <b>563.33</b> | 282.17                | <b>546.30</b>        | 273.66                 |                      |                        | 5 |
| 6 | 557.33        | 279.17                | 539.32               | 270.16                 | <b>A</b>    | <b>506.31</b> | 253.66                | 489.28               | 245.14                 |                      |                        | 4 |
| 7 | 670.41        | 335.71                | 652.40               | 326.71                 | <b>L</b>    | <b>435.27</b> | 218.14                | <b>418.24</b>        | 209.63                 |                      |                        | 3 |
| 8 | 817.48        | 409.24                | 799.47               | 400.24                 | <b>F</b>    | 322.19        | 161.60                | <b>305.16</b>        | 153.08                 |                      |                        | 2 |
| 9 |               |                       |                      |                        | <b>R</b>    | <b>175.12</b> | 88.06                 | 158.09               | 79.55                  |                      |                        | 1 |



MS/MS Fragmentation of ID084 **SSWSHALVR**

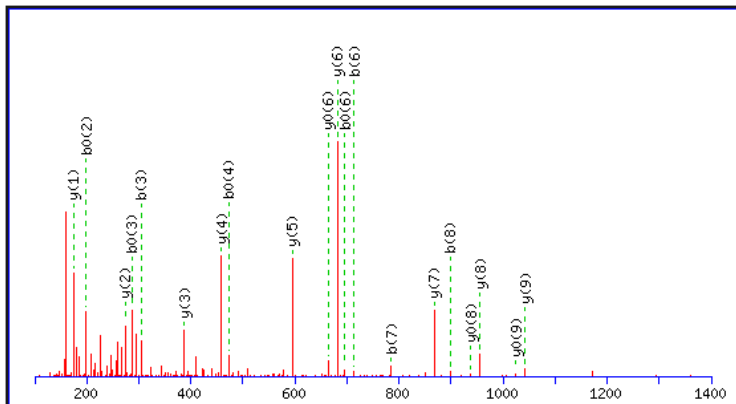

| #         | <b>b</b>      | <b>b<sup>++</sup></b> | <b>b<sup>0</sup></b> | <b>b<sup>0++</sup></b> | Seq.     | <b>y</b>       | <b>y<sup>++</sup></b> | <b>y*</b> | <b>y<sup>***</sup></b> | <b>y<sup>0</sup></b> | <b>y<sup>0++</sup></b> | #         |
|-----------|---------------|-----------------------|----------------------|------------------------|----------|----------------|-----------------------|-----------|------------------------|----------------------|------------------------|-----------|
| <b>1</b>  | 130.05        | 65.53                 | 112.04               | 56.52                  | <b>S</b> |                |                       |           |                        |                      |                        | <b>10</b> |
| <b>2</b>  | 217.08        | 109.04                | <b>199.07</b>        | 100.04                 | <b>S</b> | <b>1042.54</b> | 521.78                | 1025.52   | 513.26                 | <b>1024.53</b>       | 512.77                 | <b>9</b>  |
| <b>3</b>  | <b>304.11</b> | 152.56                | <b>286.10</b>        | 143.56                 | <b>S</b> | <b>955.51</b>  | 478.26                | 938.48    | 469.75                 | <b>937.50</b>        | 469.25                 | <b>8</b>  |
| <b>4</b>  | 490.19        | 245.60                | <b>472.18</b>        | 236.59                 | <b>W</b> | <b>868.48</b>  | 434.74                | 851.45    | 426.23                 | 850.47               | 425.74                 | <b>7</b>  |
| <b>5</b>  | 577.23        | 289.12                | 559.21               | 280.11                 | <b>S</b> | <b>682.40</b>  | 341.70                | 665.37    | 333.19                 | <b>664.39</b>        | 332.70                 | <b>6</b>  |
| <b>6</b>  | <b>714.28</b> | 357.65                | <b>696.27</b>        | 348.64                 | <b>H</b> | <b>595.37</b>  | 298.19                | 578.34    | 289.67                 |                      |                        | <b>5</b>  |
| <b>7</b>  | <b>785.32</b> | 393.16                | 767.31               | 384.16                 | <b>A</b> | <b>458.31</b>  | 229.66                | 441.28    | 221.14                 |                      |                        | <b>4</b>  |
| <b>8</b>  | <b>898.41</b> | 449.71                | 880.39               | 440.70                 | <b>L</b> | <b>387.27</b>  | 194.14                | 370.24    | 185.63                 |                      |                        | <b>3</b>  |
| <b>9</b>  | 997.47        | 499.24                | 979.46               | 490.24                 | <b>V</b> | <b>274.19</b>  | 137.60                | 257.16    | 129.08                 |                      |                        | <b>2</b>  |
| <b>10</b> |               |                       |                      |                        | <b>R</b> | <b>175.12</b>  | 88.06                 | 158.09    | 79.55                  |                      |                        | <b>1</b>  |

MS/MS Fragmentation of ID087 **SGVGVASMGVMRPELVMK**

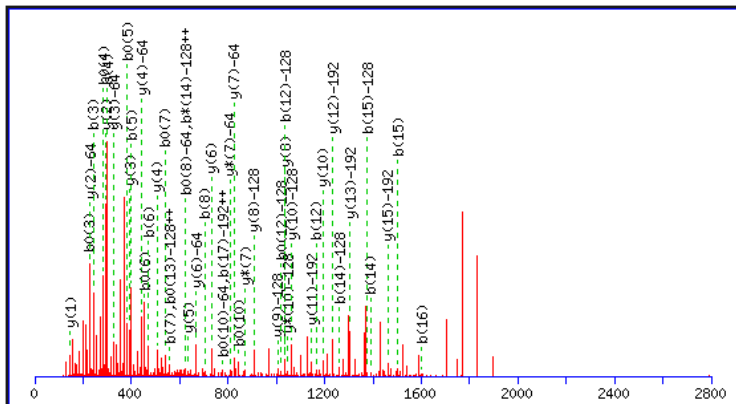

| #  | b              | b <sup>++</sup> | b <sup>*</sup> | b <sup>*++</sup> | b <sup>0</sup> | b <sup>0++</sup> | Seq. | y              | y <sup>++</sup> | y <sup>*</sup> | y <sup>*++</sup> | y <sup>0</sup> | y <sup>0++</sup> | #  |
|----|----------------|-----------------|----------------|------------------|----------------|------------------|------|----------------|-----------------|----------------|------------------|----------------|------------------|----|
| 1  | 88.04          | 44.52           |                |                  | 70.03          | 35.52            | S    |                |                 |                |                  |                |                  | 18 |
| 2  | 145.06         | 73.03           |                |                  | 127.05         | 64.03            | G    | 1616.91        | 808.96          | 1599.89        | 800.45           | 1598.90        | 799.95           | 17 |
| 3  | <b>244.13</b>  | 122.57          |                |                  | <b>226.12</b>  | 113.56           | V    | 1559.89        | 780.45          | 1542.86        | 771.94           | 1541.88        | 771.44           | 16 |
| 4  | <b>301.15</b>  | 151.08          |                |                  | <b>283.14</b>  | 142.07           | G    | <b>1460.82</b> | 730.91          | 1443.80        | 722.40           | 1442.81        | 721.91           | 15 |
| 5  | <b>400.22</b>  | 200.61          |                |                  | <b>382.21</b>  | 191.61           | V    | 1403.80        | 702.40          | 1386.77        | 693.89           | 1385.79        | 693.40           | 14 |
| 6  | <b>471.26</b>  | 236.13          |                |                  | <b>453.25</b>  | 227.13           | A    | <b>1304.73</b> | 652.87          | 1287.71        | 644.36           | 1286.72        | 643.86           | 13 |
| 7  | <b>558.29</b>  | 279.65          |                |                  | <b>540.28</b>  | 270.64           | S    | <b>1233.70</b> | 617.35          | 1216.67        | 608.84           | 1215.68        | 608.35           | 12 |
| 8  | 641.33         | 321.17          |                |                  | <b>623.31</b>  | 312.16           | M    | <b>1146.66</b> | 573.84          | 1129.64        | 565.32           | 1128.65        | 564.83           | 11 |
| 9  | 698.35         | 349.68          |                |                  | 680.34         | 340.67           | G    | <b>1063.63</b> | 532.32          | <b>1046.60</b> | 523.80           | 1045.62        | 523.31           | 10 |
| 10 | 797.42         | 399.21          |                |                  | <b>779.40</b>  | 390.21           | V    | <b>1006.60</b> | 503.81          | 989.58         | 495.29           | 988.59         | 494.80           | 9  |
| 11 | 880.45         | 440.73          |                |                  | 862.44         | 431.72           | M    | <b>907.54</b>  | 454.27          | 890.51         | 445.76           | 889.53         | 445.27           | 8  |
| 12 | <b>1036.55</b> | 518.78          | 1019.53        | 510.27           | <b>1018.54</b> | 509.78           | R    | <b>824.50</b>  | 412.75          | <b>807.47</b>  | 404.24           | 806.49         | 403.75           | 7  |
| 13 | 1133.61        | 567.31          | 1116.58        | 558.79           | 1115.60        | <b>558.30</b>    | P    | <b>668.40</b>  | 334.70          | 651.37         | 326.19           | 650.39         | 325.70           | 6  |
| 14 | <b>1262.65</b> | 631.83          | 1245.62        | <b>623.31</b>    | 1244.64        | 622.82           | E    | 571.35         | 286.18          | 554.32         | 277.66           | 553.33         | 277.17           | 5  |
| 15 | <b>1375.73</b> | 688.37          | 1358.71        | 679.86           | 1357.72        | 679.36           | L    | <b>442.30</b>  | 221.65          | 425.28         | 213.14           |                |                  | 4  |
| 16 | 1474.80        | 737.90          | 1457.77        | 729.39           | 1456.79        | 728.90           | V    | <b>329.22</b>  | 165.11          | 312.19         | 156.60           |                |                  | 3  |
| 17 | 1557.84        | <b>779.42</b>   | 1540.81        | 770.91           | 1539.83        | 770.42           | M    | <b>230.15</b>  | 115.58          | 213.12         | 107.07           |                |                  | 2  |
| 18 |                |                 |                |                  |                |                  | K    | <b>147.11</b>  | 74.06           | 130.09         | 65.55            |                |                  | 1  |

MS/MS Fragmentation of ID094 **GTEDVQAELDDLK**

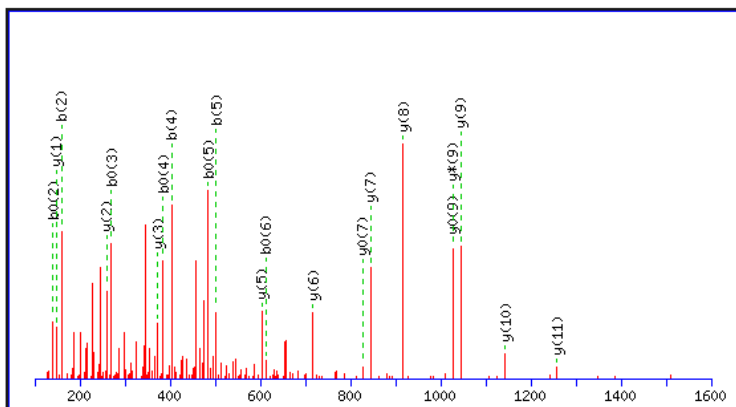

| #  | b             | b <sup>++</sup> | b*      | b <sup>*++</sup> | b <sup>0</sup> | b <sup>0++</sup> | Seq.     | y              | y <sup>++</sup> | y*             | y <sup>*++</sup> | y <sup>0</sup> | y <sup>0++</sup> | #         |
|----|---------------|-----------------|---------|------------------|----------------|------------------|----------|----------------|-----------------|----------------|------------------|----------------|------------------|-----------|
| 1  | 58.03         | 29.52           |         |                  |                |                  | <b>G</b> |                |                 |                |                  |                |                  | <b>14</b> |
| 2  | <b>159.08</b> | 80.04           |         |                  | <b>141.07</b>  | 71.04            | <b>T</b> | 1488.74        | 744.88          | 1471.72        | 736.36           | 1470.73        | 735.87           | <b>13</b> |
| 3  | 288.12        | 144.56          |         |                  | <b>270.11</b>  | 135.56           | <b>E</b> | 1387.70        | 694.35          | 1370.67        | 685.84           | 1369.68        | 685.35           | <b>12</b> |
| 4  | <b>403.15</b> | 202.08          |         |                  | <b>385.14</b>  | 193.07           | <b>D</b> | <b>1258.65</b> | 629.83          | 1241.63        | 621.32           | 1240.64        | 620.82           | <b>11</b> |
| 5  | <b>502.21</b> | 251.61          |         |                  | <b>484.20</b>  | 242.61           | <b>V</b> | <b>1143.63</b> | 572.32          | 1126.60        | 563.80           | 1125.61        | 563.31           | <b>10</b> |
| 6  | 630.27        | 315.64          | 613.25  | 307.13           | <b>612.26</b>  | 306.63           | <b>Q</b> | <b>1044.56</b> | 522.78          | <b>1027.53</b> | 514.27           | <b>1026.55</b> | 513.78           | <b>9</b>  |
| 7  | 701.31        | 351.16          | 684.28  | 342.65           | 683.30         | 342.15           | <b>A</b> | <b>916.50</b>  | 458.75          | 899.47         | 450.24           | 898.49         | 449.75           | <b>8</b>  |
| 8  | 830.35        | 415.68          | 813.33  | 407.17           | 812.34         | 406.67           | <b>E</b> | <b>845.46</b>  | 423.23          | 828.43         | 414.72           | <b>827.45</b>  | 414.23           | <b>7</b>  |
| 9  | 943.44        | 472.22          | 926.41  | 463.71           | 925.43         | 463.22           | <b>L</b> | <b>716.42</b>  | 358.71          | 699.39         | 350.20           | 698.41         | 349.71           | <b>6</b>  |
| 10 | 1058.46       | 529.74          | 1041.44 | 521.22           | 1040.45        | 520.73           | <b>D</b> | <b>603.33</b>  | 302.17          | 586.31         | 293.66           | 585.32         | 293.17           | <b>5</b>  |
| 11 | 1173.49       | 587.25          | 1156.46 | 578.74           | 1155.48        | 578.24           | <b>D</b> | 488.31         | 244.66          | 471.28         | 236.14           | 470.30         | 235.65           | <b>4</b>  |
| 12 | 1286.57       | 643.79          | 1269.55 | 635.28           | 1268.56        | 634.79           | <b>L</b> | <b>373.28</b>  | 187.14          | 356.25         | 178.63           |                |                  | <b>3</b>  |
| 13 | 1399.66       | 700.33          | 1382.63 | 691.82           | 1381.65        | 691.33           | <b>I</b> | <b>260.20</b>  | 130.60          | 243.17         | 122.09           |                |                  | <b>2</b>  |
| 14 |               |                 |         |                  |                |                  | <b>K</b> | <b>147.11</b>  | 74.06           | 130.09         | 65.55            |                |                  | <b>1</b>  |

MS/MS Fragmentation of ID096 **GINSNVDAELADLLK**

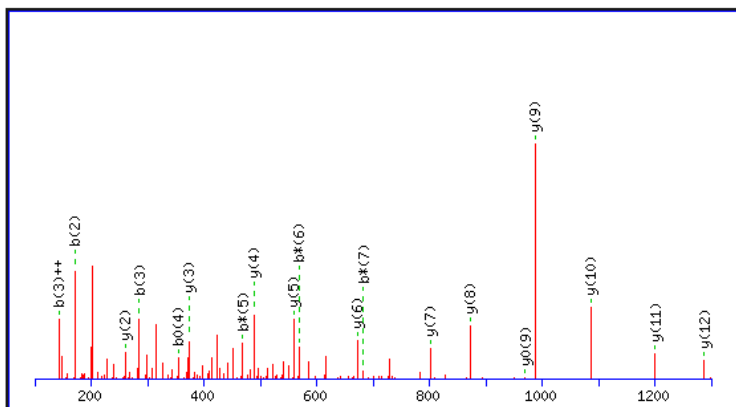

| #         | b             | b <sup>++</sup> | b*            | b <sup>*++</sup> | b <sup>0</sup> | b <sup>0++</sup> | Seq.     | y              | y <sup>++</sup> | y*      | y <sup>*++</sup> | y <sup>0</sup> | y <sup>0++</sup> | #         |
|-----------|---------------|-----------------|---------------|------------------|----------------|------------------|----------|----------------|-----------------|---------|------------------|----------------|------------------|-----------|
| <b>1</b>  | 58.03         | 29.52           |               |                  |                |                  | <b>G</b> |                |                 |         |                  |                |                  | <b>15</b> |
| <b>2</b>  | <b>171.11</b> | 86.06           |               |                  |                |                  | <b>I</b> | 1514.81        | 757.91          | 1497.78 | 749.39           | 1496.80        | 748.90           | <b>14</b> |
| <b>3</b>  | <b>285.16</b> | <b>143.08</b>   | 268.13        | 134.57           |                |                  | <b>N</b> | 1401.72        | 701.36          | 1384.70 | 692.85           | 1383.71        | 692.36           | <b>13</b> |
| <b>4</b>  | 372.19        | 186.60          | 355.16        | 178.08           | <b>354.18</b>  | 177.59           | <b>S</b> | <b>1287.68</b> | 644.34          | 1270.65 | 635.83           | 1269.67        | 635.34           | <b>12</b> |
| <b>5</b>  | 486.23        | 243.62          | <b>469.20</b> | 235.11           | 468.22         | 234.61           | <b>N</b> | <b>1200.65</b> | 600.83          | 1183.62 | 592.31           | 1182.64        | 591.82           | <b>11</b> |
| <b>6</b>  | 585.30        | 293.15          | <b>568.27</b> | 284.64           | 567.29         | 284.15           | <b>V</b> | <b>1086.60</b> | 543.81          | 1069.58 | 535.29           | 1068.59        | 534.80           | <b>10</b> |
| <b>7</b>  | 700.33        | 350.67          | <b>683.30</b> | 342.15           | 682.32         | 341.66           | <b>D</b> | <b>987.54</b>  | 494.27          | 970.51  | 485.76           | <b>969.53</b>  | 485.27           | <b>9</b>  |
| <b>8</b>  | 771.36        | 386.19          | 754.34        | 377.67           | 753.35         | 377.18           | <b>A</b> | <b>872.51</b>  | 436.76          | 855.48  | 428.24           | 854.50         | 427.75           | <b>8</b>  |
| <b>9</b>  | 900.41        | 450.71          | 883.38        | 442.19           | 882.40         | 441.70           | <b>E</b> | <b>801.47</b>  | 401.24          | 784.45  | 392.73           | 783.46         | 392.23           | <b>7</b>  |
| <b>10</b> | 1013.49       | 507.25          | 996.46        | 498.74           | 995.48         | 498.24           | <b>L</b> | <b>672.43</b>  | 336.72          | 655.40  | 328.20           | 654.42         | 327.71           | <b>6</b>  |
| <b>11</b> | 1084.53       | 542.77          | 1067.50       | 534.25           | 1066.52        | 533.76           | <b>A</b> | <b>559.34</b>  | 280.18          | 542.32  | 271.66           | 541.33         | 271.17           | <b>5</b>  |
| <b>12</b> | 1199.55       | 600.28          | 1182.53       | 591.77           | 1181.54        | 591.28           | <b>D</b> | <b>488.31</b>  | 244.66          | 471.28  | 236.14           | 470.30         | 235.65           | <b>4</b>  |
| <b>13</b> | 1312.64       | 656.82          | 1295.61       | 648.31           | 1294.63        | 647.82           | <b>L</b> | <b>373.28</b>  | 187.14          | 356.25  | 178.63           |                |                  | <b>3</b>  |
| <b>14</b> | 1425.72       | 713.36          | 1408.70       | 704.85           | 1407.71        | 704.36           | <b>L</b> | <b>260.20</b>  | 130.60          | 243.17  | 122.09           |                |                  | <b>2</b>  |
| <b>15</b> |               |                 |               |                  |                |                  | <b>K</b> | 147.11         | 74.06           | 130.09  | 65.55            |                |                  | <b>1</b>  |

MS/MS Fragmentation of ID099 **LPTNLGWR**

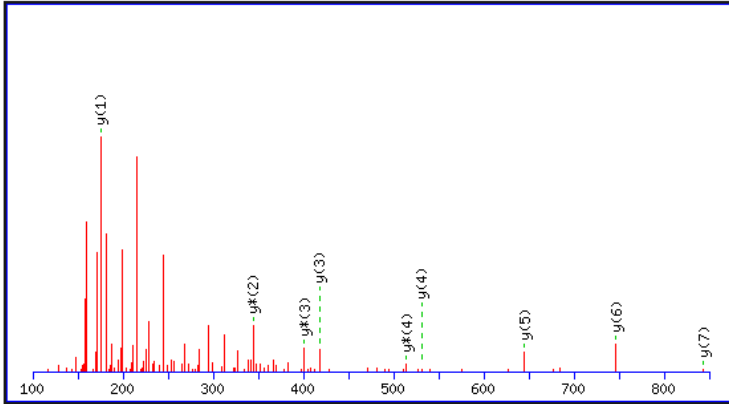

| #        | <b>b</b> | <b>b<sup>++</sup></b> | <b>b<sup>*</sup></b> | <b>b<sup>*++</sup></b> | <b>b<sup>0</sup></b> | <b>b<sup>0++</sup></b> | Seq.     | <b>y</b>      | <b>y<sup>++</sup></b> | <b>y<sup>*</sup></b> | <b>y<sup>*++</sup></b> | <b>y<sup>0</sup></b> | <b>y<sup>0++</sup></b> | #        |
|----------|----------|-----------------------|----------------------|------------------------|----------------------|------------------------|----------|---------------|-----------------------|----------------------|------------------------|----------------------|------------------------|----------|
| <b>1</b> | 114.09   | 57.55                 |                      |                        |                      |                        | <b>L</b> |               |                       |                      |                        |                      |                        | <b>8</b> |
| <b>2</b> | 211.14   | 106.08                |                      |                        |                      |                        | <b>P</b> | <b>843.45</b> | 422.23                | 826.42               | 413.71                 | 825.44               | 413.22                 | <b>7</b> |
| <b>3</b> | 312.19   | 156.60                |                      |                        | 294.18               | 147.59                 | <b>T</b> | <b>746.39</b> | 373.70                | 729.37               | 365.19                 | 728.38               | 364.70                 | <b>6</b> |
| <b>4</b> | 426.23   | 213.62                | 409.21               | 205.11                 | 408.22               | 204.62                 | <b>N</b> | <b>645.35</b> | 323.18                | 628.32               | 314.66                 |                      |                        | <b>5</b> |
| <b>5</b> | 539.32   | 270.16                | 522.29               | 261.65                 | 521.31               | 261.16                 | <b>L</b> | <b>531.30</b> | 266.16                | <b>514.28</b>        | 257.64                 |                      |                        | <b>4</b> |
| <b>6</b> | 596.34   | 298.67                | 579.31               | 290.16                 | 578.33               | 289.67                 | <b>G</b> | <b>418.22</b> | 209.61                | <b>401.19</b>        | 201.10                 |                      |                        | <b>3</b> |
| <b>7</b> | 782.42   | 391.71                | 765.39               | 383.20                 | 764.41               | 382.71                 | <b>W</b> | 361.20        | 181.10                | <b>344.17</b>        | 172.59                 |                      |                        | <b>2</b> |
| <b>8</b> |          |                       |                      |                        |                      |                        | <b>R</b> | <b>175.12</b> | 88.06                 | 158.09               | 79.55                  |                      |                        | <b>1</b> |

MS/MS Fragmentation of ID100 **ASWWLDVGR**

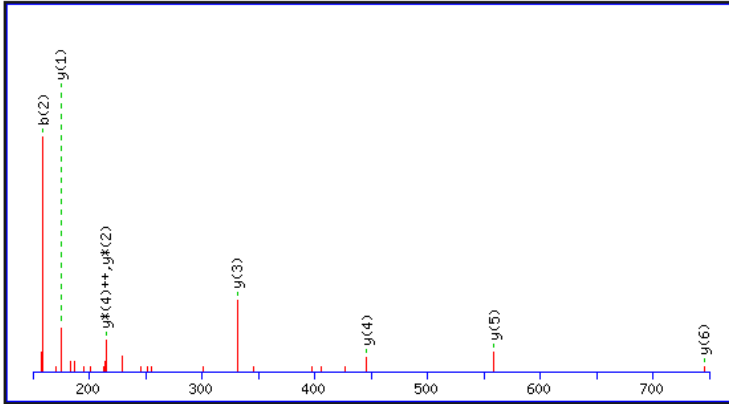

| # | <b>b</b>      | <b>b<sup>++</sup></b> | <b>b<sup>0</sup></b> | <b>b<sup>0++</sup></b> | <b>Seq.</b> | <b>y</b>      | <b>y<sup>++</sup></b> | <b>y*</b>     | <b>y*<sup>++</sup></b> | <b>y<sup>0</sup></b> | <b>y<sup>0++</sup></b> | #        |
|---|---------------|-----------------------|----------------------|------------------------|-------------|---------------|-----------------------|---------------|------------------------|----------------------|------------------------|----------|
| 1 | 72.04         | 36.53                 |                      |                        | <b>A</b>    |               |                       |               |                        |                      |                        | <b>9</b> |
| 2 | <b>159.08</b> | 80.04                 | 141.07               | 71.04                  | <b>S</b>    | 1018.51       | 509.76                | 1001.48       | 501.25                 | 1000.50              | 500.75                 | <b>8</b> |
| 3 | 345.16        | 173.08                | 327.15               | 164.08                 | <b>W</b>    | 931.48        | 466.24                | 914.45        | 457.73                 | 913.47               | 457.24                 | <b>7</b> |
| 4 | 531.24        | 266.12                | 513.22               | 257.12                 | <b>W</b>    | <b>745.40</b> | 373.20                | 728.37        | 364.69                 | 727.39               | 364.20                 | <b>6</b> |
| 5 | 644.32        | 322.66                | 626.31               | 313.66                 | <b>L</b>    | <b>559.32</b> | 280.16                | 542.29        | 271.65                 | 541.31               | 271.16                 | <b>5</b> |
| 6 | 759.35        | 380.18                | 741.34               | 371.17                 | <b>D</b>    | <b>446.24</b> | 223.62                | 429.21        | <b>215.11</b>          | 428.23               | 214.62                 | <b>4</b> |
| 7 | 858.41        | 429.71                | 840.40               | 420.71                 | <b>V</b>    | <b>331.21</b> | 166.11                | 314.18        | 157.59                 |                      |                        | <b>3</b> |
| 8 | 915.44        | 458.22                | 897.43               | 449.22                 | <b>G</b>    | 232.14        | 116.57                | <b>215.11</b> | 108.06                 |                      |                        | <b>2</b> |
| 9 |               |                       |                      |                        | <b>R</b>    | <b>175.12</b> | 88.06                 | 158.09        | 79.55                  |                      |                        | <b>1</b> |

MS/MS Fragmentation of ID102 **TLEEIQLSFR**

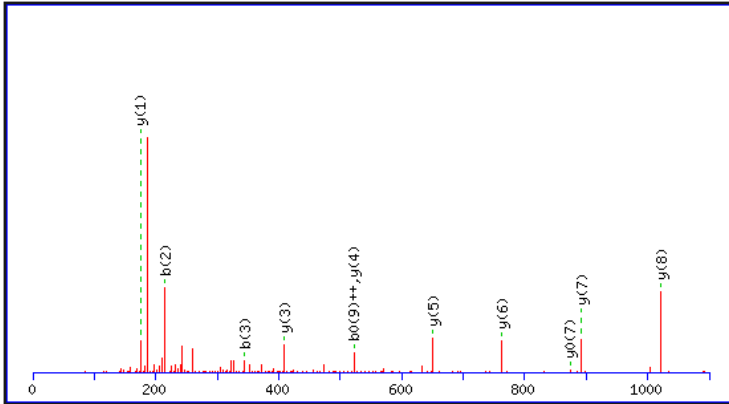

| #         | b             | b <sup>++</sup> | b*      | b <sup>*++</sup> | b <sup>0</sup> | b <sup>0++</sup> | Seq.     | y              | y <sup>++</sup> | y*      | y <sup>*++</sup> | y <sup>0</sup> | y <sup>0++</sup> | #         |
|-----------|---------------|-----------------|---------|------------------|----------------|------------------|----------|----------------|-----------------|---------|------------------|----------------|------------------|-----------|
| <b>1</b>  | 102.05        | 51.53           |         |                  | 84.04          | 42.53            | <b>T</b> |                |                 |         |                  |                |                  | <b>10</b> |
| <b>2</b>  | <b>215.14</b> | 108.07          |         |                  | 197.13         | 99.07            | <b>L</b> | 1134.62        | 567.81          | 1117.59 | 559.30           | 1116.60        | 558.81           | <b>9</b>  |
| <b>3</b>  | <b>344.18</b> | 172.59          |         |                  | 326.17         | 163.59           | <b>E</b> | <b>1021.53</b> | 511.27          | 1004.50 | 502.76           | 1003.52        | 502.26           | <b>8</b>  |
| <b>4</b>  | 473.22        | 237.12          |         |                  | 455.21         | 228.11           | <b>E</b> | <b>892.49</b>  | 446.75          | 875.46  | 438.23           | <b>874.48</b>  | 437.74           | <b>7</b>  |
| <b>5</b>  | 586.31        | 293.66          |         |                  | 568.30         | 284.65           | <b>I</b> | <b>763.45</b>  | 382.23          | 746.42  | 373.71           | 745.44         | 373.22           | <b>6</b>  |
| <b>6</b>  | 714.37        | 357.69          | 697.34  | 349.17           | 696.36         | 348.68           | <b>Q</b> | <b>650.36</b>  | 325.68          | 633.34  | 317.17           | 632.35         | 316.68           | <b>5</b>  |
| <b>7</b>  | 827.45        | 414.23          | 810.42  | 405.72           | 809.44         | 405.22           | <b>L</b> | <b>522.30</b>  | 261.66          | 505.28  | 253.14           | 504.29         | 252.65           | <b>4</b>  |
| <b>8</b>  | 914.48        | 457.75          | 897.46  | 449.23           | 896.47         | 448.74           | <b>S</b> | <b>409.22</b>  | 205.11          | 392.19  | 196.60           | 391.21         | 196.11           | <b>3</b>  |
| <b>9</b>  | 1061.55       | 531.28          | 1044.52 | 522.77           | 1043.54        | <b>522.27</b>    | <b>F</b> | 322.19         | 161.60          | 305.16  | 153.08           |                |                  | <b>2</b>  |
| <b>10</b> |               |                 |         |                  |                |                  | <b>R</b> | <b>175.12</b>  | 88.06           | 158.09  | 79.55            |                |                  | <b>1</b>  |

MS/MS Fragmentation of ID103 **LMDISGR**

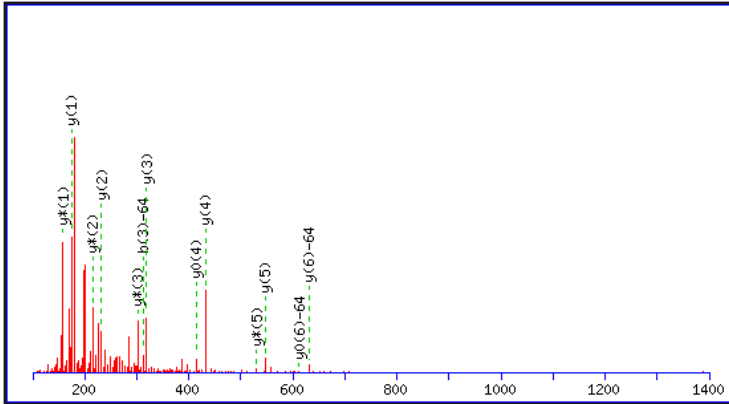

| # | <b>b</b>      | <b>b<sup>++</sup></b> | <b>b<sup>0</sup></b> | <b>b<sup>0++</sup></b> | <b>Seq.</b> | <b>y</b>      | <b>y<sup>++</sup></b> | <b>y<sup>*</sup></b> | <b>y<sup>***</sup></b> | <b>y<sup>0</sup></b> | <b>y<sup>0++</sup></b> | # |
|---|---------------|-----------------------|----------------------|------------------------|-------------|---------------|-----------------------|----------------------|------------------------|----------------------|------------------------|---|
| 1 | 114.09        | 57.55                 |                      |                        | <b>L</b>    |               |                       |                      |                        |                      |                        | 7 |
| 2 | 197.13        | 99.07                 |                      |                        | <b>M</b>    | <b>630.32</b> | 315.66                | 613.29               | 307.15                 | <b>612.31</b>        | 306.66                 | 6 |
| 3 | <b>312.16</b> | 156.58                | 294.14               | 147.58                 | <b>D</b>    | <b>547.28</b> | 274.15                | <b>530.26</b>        | 265.63                 | 529.27               | 265.14                 | 5 |
| 4 | 425.24        | 213.12                | 407.23               | 204.12                 | <b>I</b>    | <b>432.26</b> | 216.63                | 415.23               | 208.12                 | <b>414.25</b>        | 207.63                 | 4 |
| 5 | 512.27        | 256.64                | 494.26               | 247.63                 | <b>S</b>    | <b>319.17</b> | 160.09                | <b>302.15</b>        | 151.58                 | 301.16               | 151.08                 | 3 |
| 6 | 569.29        | 285.15                | 551.28               | 276.14                 | <b>G</b>    | <b>232.14</b> | 116.57                | <b>215.11</b>        | 108.06                 |                      |                        | 2 |
| 7 |               |                       |                      |                        | <b>R</b>    | <b>175.12</b> | 88.06                 | <b>158.09</b>        | 79.55                  |                      |                        | 1 |



MS/MS Fragmentation of ID109 **DGLLPSEFFSDVNR**

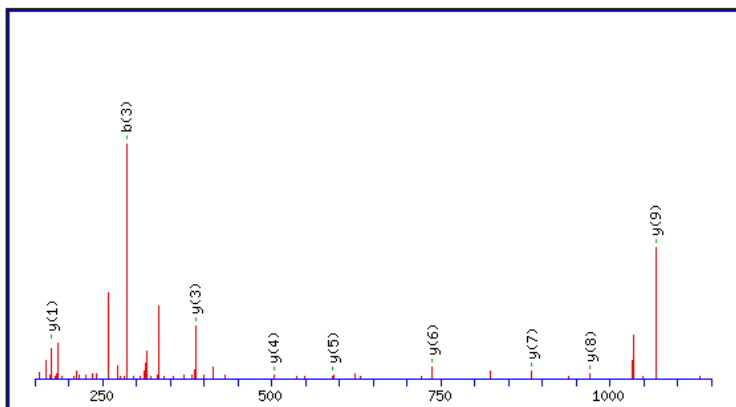

| #  | b             | b <sup>++</sup> | b*      | b <sup>*++</sup> | b <sup>0</sup> | b <sup>0++</sup> | Seq. | y              | y <sup>++</sup> | y*      | y <sup>*++</sup> | y <sup>0</sup> | y <sup>0++</sup> | #  |
|----|---------------|-----------------|---------|------------------|----------------|------------------|------|----------------|-----------------|---------|------------------|----------------|------------------|----|
| 1  | 116.03        | 58.52           |         |                  | 98.02          | 49.52            | D    |                |                 |         |                  |                |                  | 13 |
| 2  | 173.06        | 87.03           |         |                  | 155.05         | 78.03            | G    | 1351.70        | 676.35          | 1334.67 | 667.84           | 1333.69        | 667.35           | 12 |
| 3  | <b>286.14</b> | 143.57          |         |                  | 268.13         | 134.57           | L    | 1294.68        | 647.84          | 1277.65 | 639.33           | 1276.67        | 638.84           | 11 |
| 4  | 399.22        | 200.12          |         |                  | 381.21         | 191.11           | L    | 1181.59        | 591.30          | 1164.57 | 582.79           | 1163.58        | 582.30           | 10 |
| 5  | 496.28        | 248.64          |         |                  | 478.27         | 239.64           | P    | <b>1068.51</b> | 534.76          | 1051.48 | 526.25           | 1050.50        | 525.75           | 9  |
| 6  | 583.31        | 292.16          |         |                  | 565.30         | 283.15           | S    | <b>971.46</b>  | 486.23          | 954.43  | 477.72           | 953.45         | 477.23           | 8  |
| 7  | 730.38        | 365.69          |         |                  | 712.37         | 356.69           | F    | <b>884.43</b>  | 442.72          | 867.40  | 434.20           | 866.42         | 433.71           | 7  |
| 8  | 877.45        | 439.23          |         |                  | 859.43         | 430.22           | F    | <b>737.36</b>  | 369.18          | 720.33  | 360.67           | 719.35         | 360.18           | 6  |
| 9  | 964.48        | 482.74          |         |                  | 946.47         | 473.74           | S    | <b>590.29</b>  | 295.65          | 573.26  | 287.13           | 572.28         | 286.64           | 5  |
| 10 | 1079.50       | 540.26          |         |                  | 1061.49        | 531.25           | D    | <b>503.26</b>  | 252.13          | 486.23  | 243.62           | 485.25         | 243.13           | 4  |
| 11 | 1178.57       | 589.79          |         |                  | 1160.56        | 580.78           | V    | <b>388.23</b>  | 194.62          | 371.20  | 186.11           |                |                  | 3  |
| 12 | 1292.62       | 646.81          | 1275.59 | 638.30           | 1274.61        | 637.81           | N    | 289.16         | 145.08          | 272.14  | 136.57           |                |                  | 2  |
| 13 |               |                 |         |                  |                |                  | R    | <b>175.12</b>  | 88.06           | 158.09  | 79.55            |                |                  | 1  |

MS/MS Fragmentation of ID110 **DGLLPSLF<sup>SK</sup>**

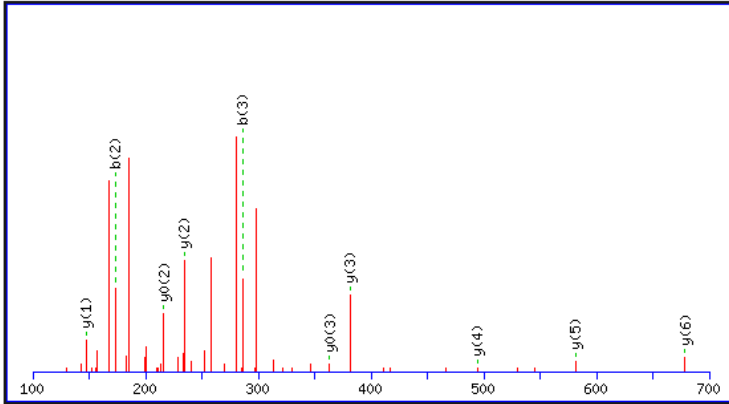

| #         | <b>b</b>      | <b>b<sup>++</sup></b> | <b>b<sup>0</sup></b> | <b>b<sup>0++</sup></b> | Seq.     | <b>y</b>      | <b>y<sup>++</sup></b> | <b>y<sup>*</sup></b> | <b>y<sup>*++</sup></b> | <b>y<sup>0</sup></b> | <b>y<sup>0++</sup></b> | #         |
|-----------|---------------|-----------------------|----------------------|------------------------|----------|---------------|-----------------------|----------------------|------------------------|----------------------|------------------------|-----------|
| <b>1</b>  | 116.03        | 58.52                 | 98.02                | 49.52                  | <b>D</b> |               |                       |                      |                        |                      |                        | <b>10</b> |
| <b>2</b>  | <b>173.06</b> | 87.03                 | 155.05               | 78.03                  | <b>G</b> | 961.57        | 481.29                | 944.55               | 472.78                 | 943.56               | 472.28                 | <b>9</b>  |
| <b>3</b>  | <b>286.14</b> | 143.57                | 268.13               | 134.57                 | <b>L</b> | 904.55        | 452.78                | 887.52               | 444.27                 | 886.54               | 443.77                 | <b>8</b>  |
| <b>4</b>  | 399.22        | 200.12                | <b>381.21</b>        | 191.11                 | <b>L</b> | 791.47        | 396.24                | 774.44               | 387.72                 | 773.46               | 387.23                 | <b>7</b>  |
| <b>5</b>  | 496.28        | 248.64                | 478.27               | 239.64                 | <b>P</b> | <b>678.38</b> | 339.69                | 661.36               | 331.18                 | 660.37               | 330.69                 | <b>6</b>  |
| <b>6</b>  | 583.31        | 292.16                | 565.30               | 283.15                 | <b>S</b> | <b>581.33</b> | 291.17                | 564.30               | 282.66                 | 563.32               | 282.16                 | <b>5</b>  |
| <b>7</b>  | 696.39        | 348.70                | <b>678.38</b>        | 339.69                 | <b>L</b> | <b>494.30</b> | 247.65                | 477.27               | 239.14                 | 476.29               | 238.65                 | <b>4</b>  |
| <b>8</b>  | 843.46        | 422.23                | 825.45               | 413.23                 | <b>F</b> | <b>381.21</b> | 191.11                | 364.19               | 182.60                 | <b>363.20</b>        | 182.10                 | <b>3</b>  |
| <b>9</b>  | 930.49        | 465.75                | 912.48               | 456.74                 | <b>S</b> | <b>234.14</b> | 117.58                | 217.12               | 109.06                 | <b>216.13</b>        | 108.57                 | <b>2</b>  |
| <b>10</b> |               |                       |                      |                        | <b>K</b> | <b>147.11</b> | 74.06                 | 130.09               | 65.55                  |                      |                        | <b>1</b>  |

MS/MS Fragmentation of ID112 **YVELAQAAFGER**

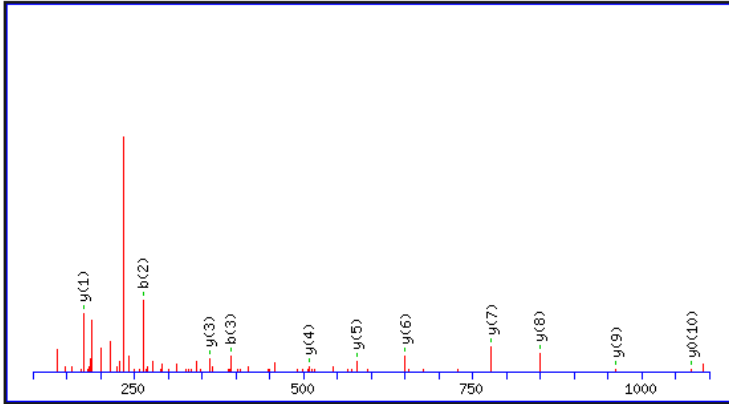

| #         | <b>b</b>      | <b>b<sup>++</sup></b> | <b>b<sup>*</sup></b> | <b>b<sup>*++</sup></b> | <b>b<sup>0</sup></b> | <b>b<sup>0++</sup></b> | Seq.     | <b>y</b>      | <b>y<sup>++</sup></b> | <b>y<sup>*</sup></b> | <b>y<sup>*++</sup></b> | <b>y<sup>0</sup></b> | <b>y<sup>0++</sup></b> | #         |
|-----------|---------------|-----------------------|----------------------|------------------------|----------------------|------------------------|----------|---------------|-----------------------|----------------------|------------------------|----------------------|------------------------|-----------|
| <b>1</b>  | 164.07        | 82.54                 |                      |                        |                      |                        | <b>Y</b> |               |                       |                      |                        |                      |                        | <b>12</b> |
| <b>2</b>  | <b>263.14</b> | 132.07                |                      |                        |                      |                        | <b>V</b> | 1190.62       | 595.81                | 1173.59              | 587.30                 | 1172.61              | 586.81                 | <b>11</b> |
| <b>3</b>  | <b>392.18</b> | 196.59                |                      |                        | 374.17               | 187.59                 | <b>E</b> | 1091.55       | 546.28                | 1074.52              | 537.76                 | <b>1073.54</b>       | 537.27                 | <b>10</b> |
| <b>4</b>  | 505.27        | 253.14                |                      |                        | 487.26               | 244.13                 | <b>L</b> | <b>962.51</b> | 481.76                | 945.48               | 473.24                 | 944.49               | 472.75                 | <b>9</b>  |
| <b>5</b>  | 576.30        | 288.66                |                      |                        | 558.29               | 279.65                 | <b>A</b> | <b>849.42</b> | 425.21                | 832.39               | 416.70                 | 831.41               | 416.21                 | <b>8</b>  |
| <b>6</b>  | 704.36        | 352.68                | 687.33               | 344.17                 | 686.35               | 343.68                 | <b>Q</b> | <b>778.38</b> | 389.70                | 761.36               | 381.18                 | 760.37               | 380.69                 | <b>7</b>  |
| <b>7</b>  | 775.40        | 388.20                | 758.37               | 379.69                 | 757.39               | 379.20                 | <b>A</b> | <b>650.33</b> | 325.67                | 633.30               | 317.15                 | 632.32               | 316.66                 | <b>6</b>  |
| <b>8</b>  | 846.44        | 423.72                | 829.41               | 415.21                 | 828.43               | 414.72                 | <b>A</b> | <b>579.29</b> | 290.15                | 562.26               | 281.63                 | 561.28               | 281.14                 | <b>5</b>  |
| <b>9</b>  | 993.50        | 497.26                | 976.48               | 488.74                 | 975.49               | 488.25                 | <b>F</b> | <b>508.25</b> | 254.63                | 491.22               | 246.12                 | 490.24               | 245.62                 | <b>4</b>  |
| <b>10</b> | 1050.53       | 525.77                | 1033.50              | 517.25                 | 1032.51              | 516.76                 | <b>G</b> | <b>361.18</b> | 181.10                | 344.16               | 172.58                 | 343.17               | 172.09                 | <b>3</b>  |
| <b>11</b> | 1179.57       | 590.29                | 1162.54              | 581.77                 | 1161.56              | 581.28                 | <b>E</b> | 304.16        | 152.58                | 287.13               | 144.07                 | 286.15               | 143.58                 | <b>2</b>  |
| <b>12</b> |               |                       |                      |                        |                      |                        | <b>R</b> | <b>175.12</b> | 88.06                 | 158.09               | 79.55                  |                      |                        | <b>1</b>  |

MS/MS Fragmentation of ID113 **NIVTDSSTYR**

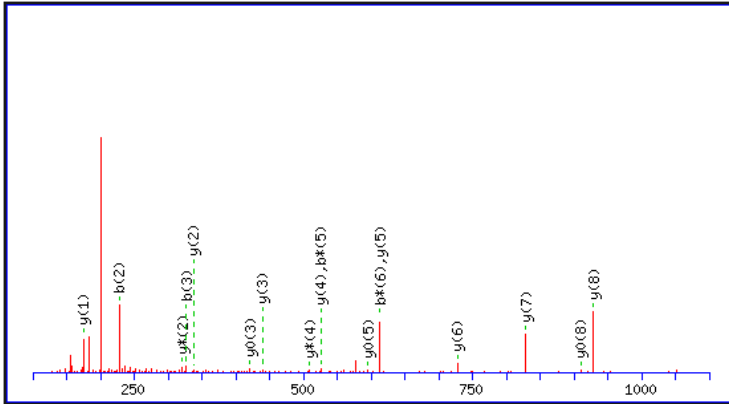

| #         | <b>b</b>      | <b>b<sup>++</sup></b> | <b>b<sup>*</sup></b> | <b>b<sup>*++</sup></b> | <b>b<sup>0</sup></b> | <b>b<sup>0++</sup></b> | Seq.     | <b>y</b>      | <b>y<sup>++</sup></b> | <b>y<sup>*</sup></b> | <b>y<sup>*++</sup></b> | <b>y<sup>0</sup></b> | <b>y<sup>0++</sup></b> | #         |
|-----------|---------------|-----------------------|----------------------|------------------------|----------------------|------------------------|----------|---------------|-----------------------|----------------------|------------------------|----------------------|------------------------|-----------|
| <b>1</b>  | 115.05        | 58.03                 | 98.02                | 49.52                  |                      |                        | <b>N</b> |               |                       |                      |                        |                      |                        | <b>10</b> |
| <b>2</b>  | <b>228.13</b> | 114.57                | 211.11               | 106.06                 |                      |                        | <b>I</b> | 1041.52       | 521.26                | 1024.49              | 512.75                 | 1023.51              | 512.26                 | <b>9</b>  |
| <b>3</b>  | <b>327.20</b> | 164.10                | 310.18               | 155.59                 |                      |                        | <b>V</b> | <b>928.44</b> | 464.72                | 911.41               | 456.21                 | <b>910.43</b>        | 455.72                 | <b>8</b>  |
| <b>4</b>  | 428.25        | 214.63                | 411.22               | 206.12                 | 410.24               | 205.62                 | <b>T</b> | <b>829.37</b> | 415.19                | 812.34               | 406.67                 | 811.36               | 406.18                 | <b>7</b>  |
| <b>5</b>  | 543.28        | 272.14                | <b>526.25</b>        | 263.63                 | 525.27               | 263.14                 | <b>D</b> | <b>728.32</b> | 364.66                | 711.29               | 356.15                 | 710.31               | 355.66                 | <b>6</b>  |
| <b>6</b>  | 630.31        | 315.66                | <b>613.28</b>        | 307.15                 | 612.30               | 306.65                 | <b>S</b> | <b>613.29</b> | 307.15                | 596.27               | 298.64                 | <b>595.28</b>        | 298.15                 | <b>5</b>  |
| <b>7</b>  | 717.34        | 359.17                | 700.31               | 350.66                 | 699.33               | 350.17                 | <b>S</b> | <b>526.26</b> | 263.63                | <b>509.24</b>        | 255.12                 | 508.25               | 254.63                 | <b>4</b>  |
| <b>8</b>  | 818.39        | 409.70                | 801.36               | 401.18                 | 800.38               | 400.69                 | <b>T</b> | <b>439.23</b> | 220.12                | 422.20               | 211.61                 | <b>421.22</b>        | 211.11                 | <b>3</b>  |
| <b>9</b>  | 981.45        | 491.23                | 964.43               | 482.72                 | 963.44               | 482.22                 | <b>Y</b> | <b>338.18</b> | 169.59                | <b>321.16</b>        | 161.08                 |                      |                        | <b>2</b>  |
| <b>10</b> |               |                       |                      |                        |                      |                        | <b>R</b> | <b>175.12</b> | 88.06                 | 158.09               | 79.55                  |                      |                        | <b>1</b>  |

MS/MS Fragmentation of ID121 **TGYLTLSSPR**

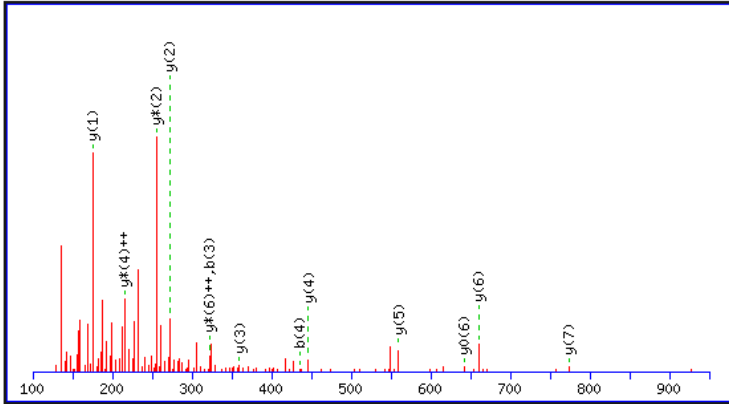

| #         | <b>b</b>      | <b>b<sup>++</sup></b> | <b>b<sup>0</sup></b> | <b>b<sup>0++</sup></b> | Seq.     | <b>y</b>      | <b>y<sup>++</sup></b> | <b>y<sup>*</sup></b> | <b>y<sup>*++</sup></b> | <b>y<sup>0</sup></b> | <b>y<sup>0++</sup></b> | #         |
|-----------|---------------|-----------------------|----------------------|------------------------|----------|---------------|-----------------------|----------------------|------------------------|----------------------|------------------------|-----------|
| <b>1</b>  | 102.05        | 51.53                 | 84.04                | 42.53                  | <b>T</b> |               |                       |                      |                        |                      |                        | <b>10</b> |
| <b>2</b>  | 159.08        | 80.04                 | 141.07               | 71.04                  | <b>G</b> | 993.54        | 497.27                | 976.51               | 488.76                 | 975.53               | 488.27                 | <b>9</b>  |
| <b>3</b>  | <b>322.14</b> | 161.57                | 304.13               | 152.57                 | <b>Y</b> | 936.51        | 468.76                | 919.49               | 460.25                 | 918.50               | 459.76                 | <b>8</b>  |
| <b>4</b>  | <b>435.22</b> | 218.12                | 417.21               | 209.11                 | <b>L</b> | <b>773.45</b> | 387.23                | 756.43               | 378.72                 | 755.44               | 378.22                 | <b>7</b>  |
| <b>5</b>  | 536.27        | 268.64                | 518.26               | 259.63                 | <b>T</b> | <b>660.37</b> | 330.69                | 643.34               | <b>322.17</b>          | <b>642.36</b>        | 321.68                 | <b>6</b>  |
| <b>6</b>  | 649.36        | 325.18                | 631.34               | 316.18                 | <b>L</b> | <b>559.32</b> | 280.16                | 542.29               | 271.65                 | 541.31               | 271.16                 | <b>5</b>  |
| <b>7</b>  | 736.39        | 368.70                | 718.38               | 359.69                 | <b>S</b> | <b>446.24</b> | 223.62                | 429.21               | <b>215.11</b>          | 428.23               | 214.62                 | <b>4</b>  |
| <b>8</b>  | 823.42        | 412.21                | 805.41               | 403.21                 | <b>S</b> | <b>359.20</b> | 180.11                | 342.18               | 171.59                 | 341.19               | 171.10                 | <b>3</b>  |
| <b>9</b>  | 920.47        | 460.74                | 902.46               | 451.73                 | <b>P</b> | <b>272.17</b> | 136.59                | <b>255.15</b>        | 128.08                 |                      |                        | <b>2</b>  |
| <b>10</b> |               |                       |                      |                        | <b>R</b> | <b>175.12</b> | 88.06                 | 158.09               | 79.55                  |                      |                        | <b>1</b>  |

MS/MS Fragmentation of ID127 **DGTVDYLGNPANR**

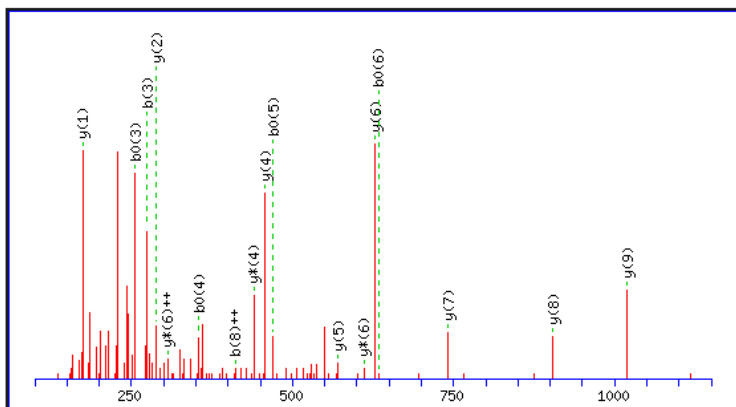

| #  | b             | b <sup>++</sup> | b <sup>*</sup> | b <sup>*++</sup> | b <sup>0</sup> | b <sup>0++</sup> | Seq.     | y              | y <sup>++</sup> | y <sup>*</sup> | y <sup>*++</sup> | y <sup>0</sup> | y <sup>0++</sup> | #         |
|----|---------------|-----------------|----------------|------------------|----------------|------------------|----------|----------------|-----------------|----------------|------------------|----------------|------------------|-----------|
| 1  | 116.03        | 58.52           |                |                  | 98.02          | 49.52            | <b>D</b> |                |                 |                |                  |                |                  | <b>13</b> |
| 2  | 173.06        | 87.03           |                |                  | 155.05         | 78.03            | <b>G</b> | 1276.63        | 638.82          | 1259.60        | 630.30           | 1258.62        | 629.81           | <b>12</b> |
| 3  | <b>274.10</b> | 137.56          |                |                  | <b>256.09</b>  | 128.55           | <b>T</b> | 1219.61        | 610.31          | 1202.58        | 601.79           | 1201.60        | 601.30           | <b>11</b> |
| 4  | 373.17        | 187.09          |                |                  | <b>355.16</b>  | 178.08           | <b>V</b> | 1118.56        | 559.78          | 1101.53        | 551.27           | 1100.55        | 550.78           | <b>10</b> |
| 5  | 488.20        | 244.60          |                |                  | <b>470.19</b>  | 235.60           | <b>D</b> | <b>1019.49</b> | 510.25          | 1002.46        | 501.74           | 1001.48        | 501.24           | <b>9</b>  |
| 6  | 651.26        | 326.13          |                |                  | <b>633.25</b>  | 317.13           | <b>Y</b> | <b>904.46</b>  | 452.74          | 887.44         | 444.22           |                |                  | <b>8</b>  |
| 7  | 764.35        | 382.68          |                |                  | 746.34         | 373.67           | <b>L</b> | <b>741.40</b>  | 371.20          | 724.37         | 362.69           |                |                  | <b>7</b>  |
| 8  | 821.37        | <b>411.19</b>   |                |                  | 803.36         | 402.18           | <b>G</b> | <b>628.32</b>  | 314.66          | <b>611.29</b>  | <b>306.15</b>    |                |                  | <b>6</b>  |
| 9  | 935.41        | 468.21          | 918.38         | 459.70           | 917.40         | 459.20           | <b>N</b> | <b>571.29</b>  | 286.15          | 554.27         | 277.64           |                |                  | <b>5</b>  |
| 10 | 1032.46       | 516.74          | 1015.44        | 508.22           | 1014.45        | 507.73           | <b>P</b> | <b>457.25</b>  | 229.13          | <b>440.23</b>  | 220.62           |                |                  | <b>4</b>  |
| 11 | 1103.50       | 552.25          | 1086.47        | 543.74           | 1085.49        | 543.25           | <b>A</b> | 360.20         | 180.60          | 343.17         | 172.09           |                |                  | <b>3</b>  |
| 12 | 1217.54       | 609.28          | 1200.52        | 600.76           | 1199.53        | 600.27           | <b>N</b> | <b>289.16</b>  | 145.08          | 272.14         | 136.57           |                |                  | <b>2</b>  |
| 13 |               |                 |                |                  |                |                  | <b>R</b> | <b>175.12</b>  | 88.06           | 158.09         | 79.55            |                |                  | <b>1</b>  |

MS/MS Fragmentation of ID130 **GNDFGLFSTQFAR**

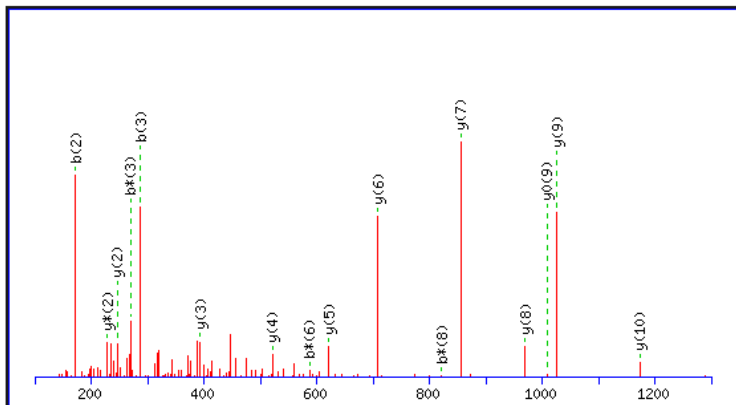

| #  | b             | b <sup>++</sup> | b*            | b <sup>*++</sup> | b <sup>0</sup> | b <sup>0++</sup> | Seq.     | y              | y <sup>++</sup> | y*            | y <sup>*++</sup> | y <sup>0</sup> | y <sup>0++</sup> | #         |
|----|---------------|-----------------|---------------|------------------|----------------|------------------|----------|----------------|-----------------|---------------|------------------|----------------|------------------|-----------|
| 1  | 58.03         | 29.52           |               |                  |                |                  | <b>G</b> |                |                 |               |                  |                |                  | <b>13</b> |
| 2  | <b>172.07</b> | 86.54           | 155.05        | 78.03            |                |                  | <b>N</b> | 1402.67        | 701.84          | 1385.65       | 693.33           | 1384.66        | 692.84           | <b>12</b> |
| 3  | <b>287.10</b> | 144.05          | <b>270.07</b> | 135.54           | 269.09         | 135.05           | <b>D</b> | 1288.63        | 644.82          | 1271.61       | 636.31           | 1270.62        | 635.81           | <b>11</b> |
| 4  | 434.17        | 217.59          | 417.14        | 209.07           | 416.16         | 208.58           | <b>F</b> | <b>1173.61</b> | 587.31          | 1156.58       | 578.79           | 1155.59        | 578.30           | <b>10</b> |
| 5  | 491.19        | 246.10          | 474.16        | 237.58           | 473.18         | 237.09           | <b>G</b> | <b>1026.54</b> | 513.77          | 1009.51       | 505.26           | <b>1008.53</b> | 504.77           | <b>9</b>  |
| 6  | 604.27        | 302.64          | <b>587.25</b> | 294.13           | 586.26         | 293.63           | <b>L</b> | <b>969.52</b>  | 485.26          | 952.49        | 476.75           | 951.50         | 476.26           | <b>8</b>  |
| 7  | 751.34        | 376.17          | 734.31        | 367.66           | 733.33         | 367.17           | <b>F</b> | <b>856.43</b>  | 428.72          | 839.40        | 420.21           | 838.42         | 419.71           | <b>7</b>  |
| 8  | 838.37        | 419.69          | <b>821.35</b> | 411.18           | 820.36         | 410.68           | <b>S</b> | <b>709.36</b>  | 355.19          | 692.34        | 346.67           | 691.35         | 346.18           | <b>6</b>  |
| 9  | 939.42        | 470.21          | 922.39        | 461.70           | 921.41         | 461.21           | <b>T</b> | <b>622.33</b>  | 311.67          | 605.30        | 303.16           | 604.32         | 302.66           | <b>5</b>  |
| 10 | 1067.48       | 534.24          | 1050.45       | 525.73           | 1049.47        | 525.24           | <b>Q</b> | <b>521.28</b>  | 261.15          | 504.26        | 252.63           |                |                  | <b>4</b>  |
| 11 | 1214.55       | 607.78          | 1197.52       | 599.26           | 1196.54        | 598.77           | <b>F</b> | <b>393.22</b>  | 197.12          | 376.20        | 188.60           |                |                  | <b>3</b>  |
| 12 | 1285.58       | 643.30          | 1268.56       | 634.78           | 1267.57        | 634.29           | <b>A</b> | <b>246.16</b>  | 123.58          | <b>229.13</b> | 115.07           |                |                  | <b>2</b>  |
| 13 |               |                 |               |                  |                |                  | <b>R</b> | 175.12         | 88.06           | 158.09        | 79.55            |                |                  | <b>1</b>  |

MS/MS Fragmentation of ID132 **ETFFPDDPLR**

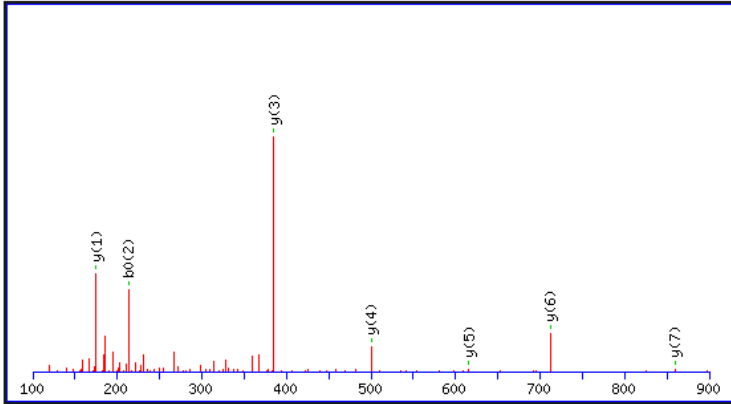

| #         | <b>b</b> | <b>b<sup>++</sup></b> | <b>b<sup>0</sup></b> | <b>b<sup>0++</sup></b> | Seq.     | <b>y</b>      | <b>y<sup>++</sup></b> | <b>y<sup>*</sup></b> | <b>y<sup>*++</sup></b> | <b>y<sup>0</sup></b> | <b>y<sup>0++</sup></b> | #         |
|-----------|----------|-----------------------|----------------------|------------------------|----------|---------------|-----------------------|----------------------|------------------------|----------------------|------------------------|-----------|
| <b>1</b>  | 130.05   | 65.53                 | 112.04               | 56.52                  | <b>E</b> |               |                       |                      |                        |                      |                        | <b>10</b> |
| <b>2</b>  | 231.10   | 116.05                | <b>213.09</b>        | 107.05                 | <b>T</b> | 1107.55       | 554.28                | 1090.52              | 545.76                 | 1089.54              | 545.27                 | <b>9</b>  |
| <b>3</b>  | 378.17   | 189.59                | 360.16               | 180.58                 | <b>F</b> | 1006.50       | 503.75                | 989.47               | 495.24                 | 988.49               | 494.75                 | <b>8</b>  |
| <b>4</b>  | 525.23   | 263.12                | 507.22               | 254.12                 | <b>F</b> | <b>859.43</b> | 430.22                | 842.40               | 421.71                 | 841.42               | 421.21                 | <b>7</b>  |
| <b>5</b>  | 622.29   | 311.65                | 604.28               | 302.64                 | <b>P</b> | <b>712.36</b> | 356.68                | 695.34               | 348.17                 | 694.35               | 347.68                 | <b>6</b>  |
| <b>6</b>  | 737.31   | 369.16                | 719.30               | 360.16                 | <b>D</b> | <b>615.31</b> | 308.16                | 598.28               | 299.65                 | 597.30               | 299.15                 | <b>5</b>  |
| <b>7</b>  | 852.34   | 426.67                | 834.33               | 417.67                 | <b>D</b> | <b>500.28</b> | 250.64                | 483.26               | 242.13                 | 482.27               | 241.64                 | <b>4</b>  |
| <b>8</b>  | 949.39   | 475.20                | 931.38               | 466.20                 | <b>P</b> | <b>385.26</b> | 193.13                | 368.23               | 184.62                 |                      |                        | <b>3</b>  |
| <b>9</b>  | 1062.48  | 531.74                | 1044.47              | 522.74                 | <b>L</b> | 288.20        | 144.61                | 271.18               | 136.09                 |                      |                        | <b>2</b>  |
| <b>10</b> |          |                       |                      |                        | <b>R</b> | <b>175.12</b> | 88.06                 | 158.09               | 79.55                  |                      |                        | <b>1</b>  |



MS/MS Fragmentation of ID133 **ETFFPDDPLR**

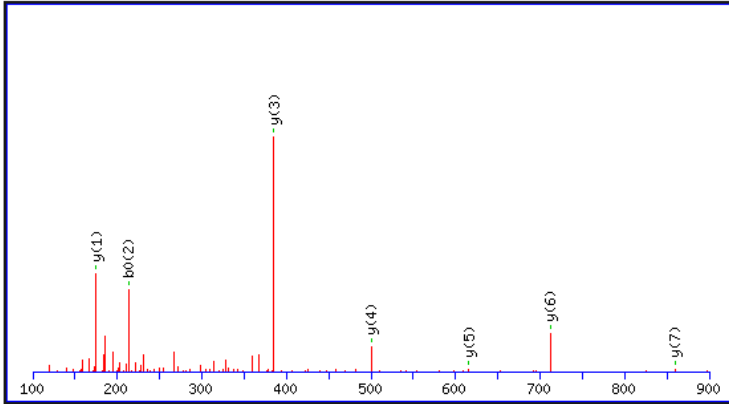

| #         | <b>b</b> | <b>b<sup>++</sup></b> | <b>b<sup>0</sup></b> | <b>b<sup>0++</sup></b> | Seq.     | <b>y</b>      | <b>y<sup>++</sup></b> | <b>y<sup>*</sup></b> | <b>y<sup>*++</sup></b> | <b>y<sup>0</sup></b> | <b>y<sup>0++</sup></b> | #         |
|-----------|----------|-----------------------|----------------------|------------------------|----------|---------------|-----------------------|----------------------|------------------------|----------------------|------------------------|-----------|
| <b>1</b>  | 130.05   | 65.53                 | 112.04               | 56.52                  | <b>E</b> |               |                       |                      |                        |                      |                        | <b>10</b> |
| <b>2</b>  | 231.10   | 116.05                | <b>213.09</b>        | 107.05                 | <b>T</b> | 1107.55       | 554.28                | 1090.52              | 545.76                 | 1089.54              | 545.27                 | <b>9</b>  |
| <b>3</b>  | 378.17   | 189.59                | 360.16               | 180.58                 | <b>F</b> | 1006.50       | 503.75                | 989.47               | 495.24                 | 988.49               | 494.75                 | <b>8</b>  |
| <b>4</b>  | 525.23   | 263.12                | 507.22               | 254.12                 | <b>F</b> | <b>859.43</b> | 430.22                | 842.40               | 421.71                 | 841.42               | 421.21                 | <b>7</b>  |
| <b>5</b>  | 622.29   | 311.65                | 604.28               | 302.64                 | <b>P</b> | <b>712.36</b> | 356.68                | 695.34               | 348.17                 | 694.35               | 347.68                 | <b>6</b>  |
| <b>6</b>  | 737.31   | 369.16                | 719.30               | 360.16                 | <b>D</b> | <b>615.31</b> | 308.16                | 598.28               | 299.65                 | 597.30               | 299.15                 | <b>5</b>  |
| <b>7</b>  | 852.34   | 426.67                | 834.33               | 417.67                 | <b>D</b> | <b>500.28</b> | 250.64                | 483.26               | 242.13                 | 482.27               | 241.64                 | <b>4</b>  |
| <b>8</b>  | 949.39   | 475.20                | 931.38               | 466.20                 | <b>P</b> | <b>385.26</b> | 193.13                | 368.23               | 184.62                 |                      |                        | <b>3</b>  |
| <b>9</b>  | 1062.48  | 531.74                | 1044.47              | 522.74                 | <b>L</b> | 288.20        | 144.61                | 271.18               | 136.09                 |                      |                        | <b>2</b>  |
| <b>10</b> |          |                       |                      |                        | <b>R</b> | <b>175.12</b> | 88.06                 | 158.09               | 79.55                  |                      |                        | <b>1</b>  |

MS/MS Fragmentation of ID136 **SEEFYSLPFNLNK**

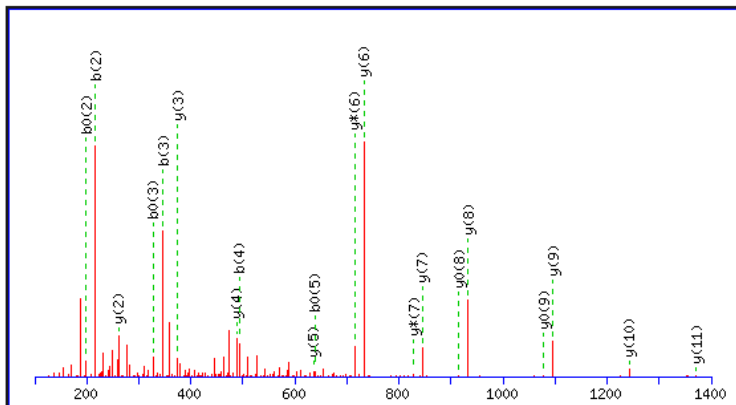

| #  | b             | b <sup>++</sup> | b*      | b <sup>*++</sup> | b <sup>0</sup> | b <sup>0++</sup> | Seq. | y              | y <sup>++</sup> | y*            | y <sup>*++</sup> | y <sup>0</sup> | y <sup>0++</sup> | #  |
|----|---------------|-----------------|---------|------------------|----------------|------------------|------|----------------|-----------------|---------------|------------------|----------------|------------------|----|
| 1  | 88.04         | 44.52           |         |                  | 70.03          | 35.52            | S    |                |                 |               |                  |                |                  | 13 |
| 2  | <b>217.08</b> | 109.04          |         |                  | <b>199.07</b>  | 100.04           | E    | 1500.74        | 750.87          | 1483.71       | 742.36           | 1482.73        | 741.87           | 12 |
| 3  | <b>346.12</b> | 173.57          |         |                  | <b>328.11</b>  | 164.56           | E    | <b>1371.69</b> | 686.35          | 1354.67       | 677.84           | 1353.68        | 677.35           | 11 |
| 4  | <b>493.19</b> | 247.10          |         |                  | 475.18         | 238.09           | F    | <b>1242.65</b> | 621.83          | 1225.63       | 613.32           | 1224.64        | 612.82           | 10 |
| 5  | 656.26        | 328.63          |         |                  | <b>638.25</b>  | 319.63           | Y    | <b>1095.58</b> | 548.30          | 1078.56       | 539.78           | <b>1077.57</b> | 539.29           | 9  |
| 6  | 743.29        | 372.15          |         |                  | 725.28         | 363.14           | S    | <b>932.52</b>  | 466.76          | 915.49        | 458.25           | <b>914.51</b>  | 457.76           | 8  |
| 7  | 856.37        | 428.69          |         |                  | 838.36         | 419.68           | L    | <b>845.49</b>  | 423.25          | <b>828.46</b> | 414.73           |                |                  | 7  |
| 8  | 953.43        | 477.22          |         |                  | 935.41         | 468.21           | P    | <b>732.40</b>  | 366.71          | <b>715.38</b> | 358.19           |                |                  | 6  |
| 9  | 1100.49       | 550.75          |         |                  | 1082.48        | 541.75           | F    | <b>635.35</b>  | 318.18          | 618.32        | 309.67           |                |                  | 5  |
| 10 | 1214.54       | 607.77          | 1197.51 | 599.26           | 1196.53        | 598.77           | N    | <b>488.28</b>  | 244.64          | 471.26        | 236.13           |                |                  | 4  |
| 11 | 1327.62       | 664.31          | 1310.59 | 655.80           | 1309.61        | 655.31           | L    | <b>374.24</b>  | 187.62          | 357.21        | 179.11           |                |                  | 3  |
| 12 | 1441.66       | 721.34          | 1424.64 | 712.82           | 1423.65        | 712.33           | N    | <b>261.16</b>  | 131.08          | 244.13        | 122.57           |                |                  | 2  |
| 13 |               |                 |         |                  |                |                  | K    | 147.11         | 74.06           | 130.09        | 65.55            |                |                  | 1  |

MS/MS Fragmentation of ID140 **GIGQSDSIAEQGQIFAR**

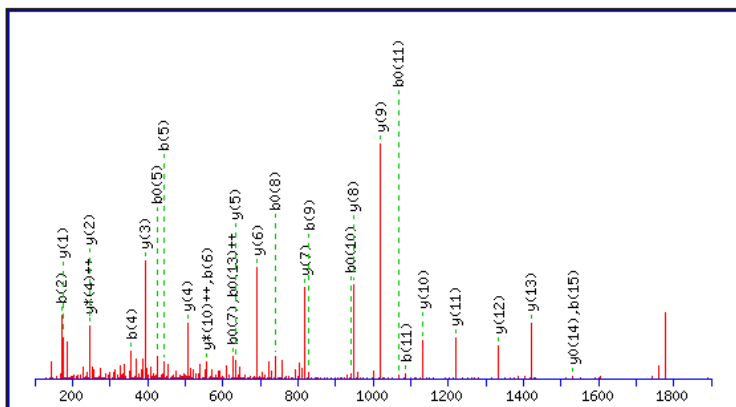

| #  | b       | b <sup>++</sup> | b <sup>*</sup> | b <sup>*++</sup> | b <sup>0</sup> | b <sup>0++</sup> | Seq. | y       | y <sup>++</sup> | y <sup>*</sup> | y <sup>*++</sup> | y <sup>0</sup> | y <sup>0++</sup> | #  |
|----|---------|-----------------|----------------|------------------|----------------|------------------|------|---------|-----------------|----------------|------------------|----------------|------------------|----|
| 1  | 58.03   | 29.52           |                |                  |                |                  | G    |         |                 |                |                  |                |                  | 17 |
| 2  | 171.11  | 86.06           |                |                  |                |                  | I    | 1719.87 | 860.44          | 1702.84        | 851.92           | 1701.86        | 851.43           | 16 |
| 3  | 228.13  | 114.57          |                |                  |                |                  | G    | 1606.78 | 803.89          | 1589.76        | 795.38           | 1588.77        | 794.89           | 15 |
| 4  | 356.19  | 178.60          | 339.17         | 170.09           |                |                  | Q    | 1549.76 | 775.38          | 1532.73        | 766.87           | 1531.75        | 766.38           | 14 |
| 5  | 443.22  | 222.12          | 426.20         | 213.60           | 425.21         | 213.11           | S    | 1421.70 | 711.35          | 1404.68        | 702.84           | 1403.69        | 702.35           | 13 |
| 6  | 558.25  | 279.63          | 541.23         | 271.12           | 540.24         | 270.62           | D    | 1334.67 | 667.84          | 1317.64        | 659.33           | 1316.66        | 658.83           | 12 |
| 7  | 645.28  | 323.15          | 628.26         | 314.63           | 627.27         | 314.14           | S    | 1219.64 | 610.33          | 1202.62        | 601.81           | 1201.63        | 601.32           | 11 |
| 8  | 758.37  | 379.69          | 741.34         | 371.17           | 740.36         | 370.68           | I    | 1132.61 | 566.81          | 1115.58        | 558.30           | 1114.60        | 557.80           | 10 |
| 9  | 829.41  | 415.21          | 812.38         | 406.69           | 811.39         | 406.20           | A    | 1019.53 | 510.27          | 1002.50        | 501.75           | 1001.52        | 501.26           | 9  |
| 10 | 958.45  | 479.73          | 941.42         | 471.21           | 940.44         | 470.72           | E    | 948.49  | 474.75          | 931.46         | 466.24           | 930.48         | 465.74           | 8  |
| 11 | 1086.51 | 543.76          | 1069.48        | 535.24           | 1068.50        | 534.75           | Q    | 819.45  | 410.23          | 802.42         | 401.71           |                |                  | 7  |
| 12 | 1143.53 | 572.27          | 1126.50        | 563.75           | 1125.52        | 563.26           | G    | 691.39  | 346.20          | 674.36         | 337.68           |                |                  | 6  |
| 13 | 1271.59 | 636.30          | 1254.56        | 627.78           | 1253.58        | 627.29           | Q    | 634.37  | 317.69          | 617.34         | 309.17           |                |                  | 5  |
| 14 | 1384.67 | 692.84          | 1367.64        | 684.33           | 1366.66        | 683.83           | I    | 506.31  | 253.66          | 489.28         | 245.14           |                |                  | 4  |
| 15 | 1531.74 | 766.37          | 1514.71        | 757.86           | 1513.73        | 757.37           | F    | 393.22  | 197.12          | 376.20         | 188.60           |                |                  | 3  |
| 16 | 1602.78 | 801.89          | 1585.75        | 793.38           | 1584.77        | 792.89           | A    | 246.16  | 123.58          | 229.13         | 115.07           |                |                  | 2  |
| 17 |         |                 |                |                  |                |                  | R    | 175.12  | 88.06           | 158.09         | 79.55            |                |                  | 1  |

MS/MS Fragmentation of ID141 **AAFADMLPLVK**

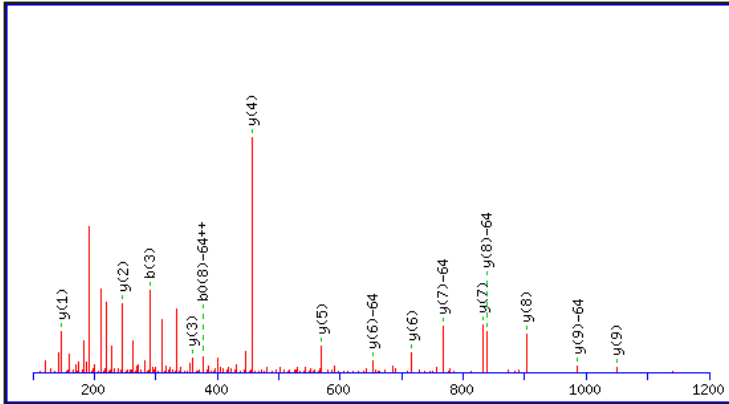

| #         | b             | b <sup>++</sup> | b <sup>0</sup> | b <sup>0++</sup> | Seq.     | y             | y <sup>++</sup> | y <sup>*</sup> | y <sup>*++</sup> | y <sup>0</sup> | y <sup>0++</sup> | #         |
|-----------|---------------|-----------------|----------------|------------------|----------|---------------|-----------------|----------------|------------------|----------------|------------------|-----------|
| <b>1</b>  | 72.04         | 36.53           |                |                  | <b>A</b> |               |                 |                |                  |                |                  | <b>11</b> |
| <b>2</b>  | 143.08        | 72.04           |                |                  | <b>A</b> | 1056.61       | 528.81          | 1039.58        | 520.29           | 1038.60        | 519.80           | <b>10</b> |
| <b>3</b>  | <b>290.15</b> | 145.58          |                |                  | <b>F</b> | <b>985.57</b> | 493.29          | 968.55         | 484.78           | 967.56         | 484.28           | <b>9</b>  |
| <b>4</b>  | 361.19        | 181.10          |                |                  | <b>A</b> | <b>838.50</b> | 419.76          | 821.48         | 411.24           | 820.49         | 410.75           | <b>8</b>  |
| <b>5</b>  | 476.21        | 238.61          | 458.20         | 229.61           | <b>D</b> | <b>767.47</b> | 384.24          | 750.44         | 375.72           | 749.46         | 375.23           | <b>7</b>  |
| <b>6</b>  | 559.25        | 280.13          | 541.24         | 271.12           | <b>M</b> | <b>652.44</b> | 326.72          | 635.41         | 318.21           |                |                  | <b>6</b>  |
| <b>7</b>  | 672.34        | 336.67          | 654.32         | 327.67           | <b>L</b> | <b>569.40</b> | 285.20          | 552.38         | 276.69           |                |                  | <b>5</b>  |
| <b>8</b>  | 769.39        | 385.20          | 751.38         | <b>376.19</b>    | <b>P</b> | <b>456.32</b> | 228.66          | 439.29         | 220.15           |                |                  | <b>4</b>  |
| <b>9</b>  | 882.47        | 441.74          | 864.46         | 432.73           | <b>L</b> | <b>359.27</b> | 180.14          | 342.24         | 171.62           |                |                  | <b>3</b>  |
| <b>10</b> | 981.54        | 491.27          | 963.53         | 482.27           | <b>V</b> | <b>246.18</b> | 123.59          | 229.15         | 115.08           |                |                  | <b>2</b>  |
| <b>11</b> |               |                 |                |                  | <b>K</b> | <b>147.11</b> | 74.06           | 130.09         | 65.55            |                |                  | <b>1</b>  |

MS/MS Fragmentation of ID142 **I A F P G I I A R**

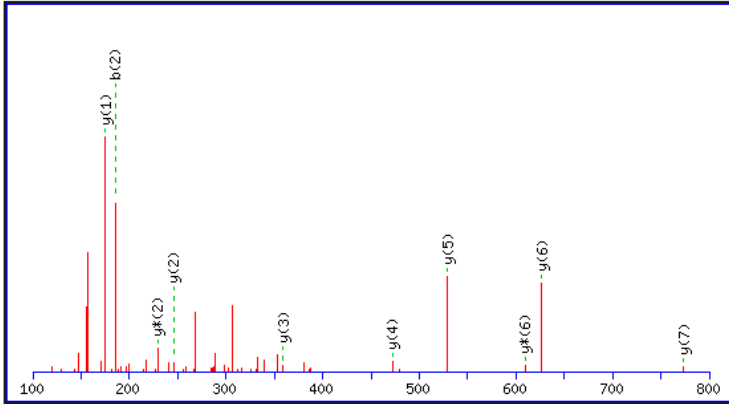

| # | b             | b <sup>++</sup> | Seq. | y             | y <sup>++</sup> | y*            | y <sup>*++</sup> | # |
|---|---------------|-----------------|------|---------------|-----------------|---------------|------------------|---|
| 1 | 114.09        | 57.55           | I    |               |                 |               |                  | 9 |
| 2 | <b>185.13</b> | 93.07           | A    | 844.50        | 422.76          | 827.48        | 414.24           | 8 |
| 3 | 332.20        | 166.60          | F    | <b>773.47</b> | 387.24          | 756.44        | 378.72           | 7 |
| 4 | 429.25        | 215.13          | P    | <b>626.40</b> | 313.70          | <b>609.37</b> | 305.19           | 6 |
| 5 | 486.27        | 243.64          | G    | <b>529.35</b> | 265.18          | 512.32        | 256.66           | 5 |
| 6 | 599.36        | 300.18          | I    | <b>472.32</b> | 236.67          | 455.30        | 228.15           | 4 |
| 7 | 712.44        | 356.72          | I    | <b>359.24</b> | 180.12          | 342.21        | 171.61           | 3 |
| 8 | 783.48        | 392.24          | A    | <b>246.16</b> | 123.58          | <b>229.13</b> | 115.07           | 2 |
| 9 |               |                 | R    | <b>175.12</b> | 88.06           | 158.09        | 79.55            | 1 |

MS/MS Fragmentation of ID143 **DIAEEAGLYAR**

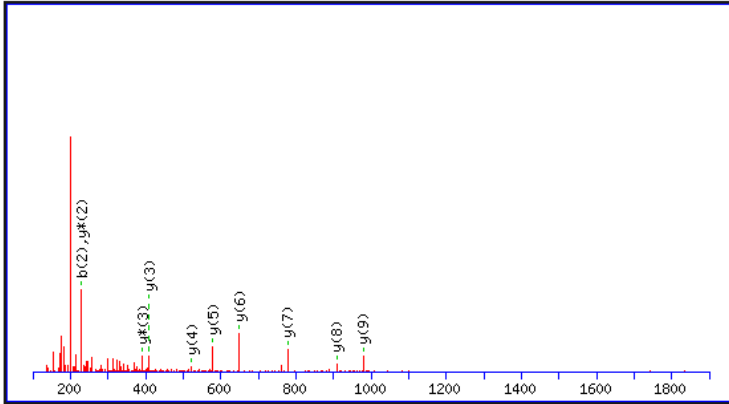

| #         | <b>b</b>      | <b>b<sup>++</sup></b> | <b>b<sup>0</sup></b> | <b>b<sup>0++</sup></b> | Seq.     | <b>y</b>      | <b>y<sup>++</sup></b> | <b>y<sup>*</sup></b> | <b>y<sup>*++</sup></b> | <b>y<sup>0</sup></b> | <b>y<sup>0++</sup></b> | #         |
|-----------|---------------|-----------------------|----------------------|------------------------|----------|---------------|-----------------------|----------------------|------------------------|----------------------|------------------------|-----------|
| <b>1</b>  | 116.03        | 58.52                 | 98.02                | 49.52                  | <b>D</b> |               |                       |                      |                        |                      |                        | <b>11</b> |
| <b>2</b>  | <b>229.12</b> | 115.06                | 211.11               | 106.06                 | <b>I</b> | 1092.57       | 546.79                | 1075.54              | 538.27                 | 1074.56              | 537.78                 | <b>10</b> |
| <b>3</b>  | 300.16        | 150.58                | 282.14               | 141.58                 | <b>A</b> | <b>979.48</b> | 490.25                | 962.46               | 481.73                 | 961.47               | 481.24                 | <b>9</b>  |
| <b>4</b>  | 429.20        | 215.10                | 411.19               | 206.10                 | <b>E</b> | <b>908.45</b> | 454.73                | 891.42               | 446.21                 | 890.44               | 445.72                 | <b>8</b>  |
| <b>5</b>  | 558.24        | 279.62                | 540.23               | 270.62                 | <b>E</b> | <b>779.40</b> | 390.21                | 762.38               | 381.69                 | 761.39               | 381.20                 | <b>7</b>  |
| <b>6</b>  | 629.28        | 315.14                | 611.27               | 306.14                 | <b>A</b> | <b>650.36</b> | 325.68                | 633.34               | 317.17                 |                      |                        | <b>6</b>  |
| <b>7</b>  | 686.30        | 343.65                | 668.29               | 334.65                 | <b>G</b> | <b>579.32</b> | 290.17                | 562.30               | 281.65                 |                      |                        | <b>5</b>  |
| <b>8</b>  | 799.38        | 400.20                | 781.37               | 391.19                 | <b>L</b> | <b>522.30</b> | 261.66                | 505.28               | 253.14                 |                      |                        | <b>4</b>  |
| <b>9</b>  | 962.45        | 481.73                | 944.44               | 472.72                 | <b>Y</b> | <b>409.22</b> | 205.11                | <b>392.19</b>        | 196.60                 |                      |                        | <b>3</b>  |
| <b>10</b> | 1033.48       | 517.25                | 1015.47              | 508.24                 | <b>A</b> | 246.16        | 123.58                | <b>229.13</b>        | 115.07                 |                      |                        | <b>2</b>  |
| <b>11</b> |               |                       |                      |                        | <b>R</b> | 175.12        | 88.06                 | 158.09               | 79.55                  |                      |                        | <b>1</b>  |

MS/MS Fragmentation of ID144 **YEMLGVYLQR**

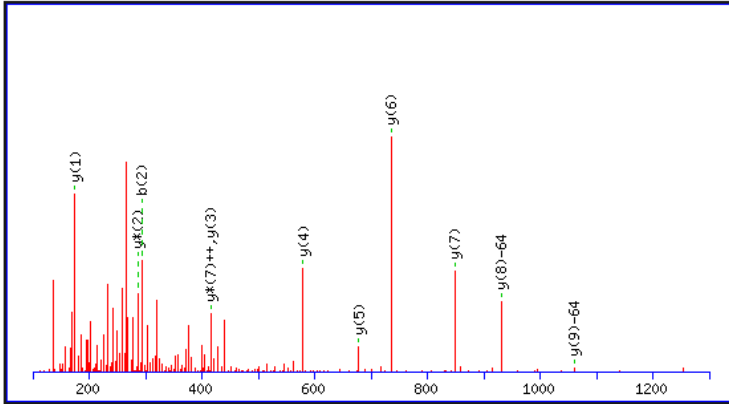

| #  | b             | b <sup>++</sup> | b*      | b <sup>*++</sup> | b <sup>0</sup> | b <sup>0++</sup> | Seq. | y              | y <sup>++</sup> | y*            | y <sup>*++</sup> | y <sup>0</sup> | y <sup>0++</sup> | #  |
|----|---------------|-----------------|---------|------------------|----------------|------------------|------|----------------|-----------------|---------------|------------------|----------------|------------------|----|
| 1  | 164.07        | 82.54           |         |                  |                |                  | Y    |                |                 |               |                  |                |                  | 10 |
| 2  | <b>293.11</b> | 147.06          |         |                  | 275.10         | 138.05           | E    | <b>1060.58</b> | 530.79          | 1043.55       | 522.28           | 1042.57        | 521.79           | 9  |
| 3  | 376.15        | 188.58          |         |                  | 358.14         | 179.57           | M    | <b>931.54</b>  | 466.27          | 914.51        | 457.76           |                |                  | 8  |
| 4  | 489.23        | 245.12          |         |                  | 471.22         | 236.12           | L    | <b>848.50</b>  | 424.75          | 831.47        | <b>416.24</b>    |                |                  | 7  |
| 5  | 546.26        | 273.63          |         |                  | 528.25         | 264.63           | G    | <b>735.41</b>  | 368.21          | 718.39        | 359.70           |                |                  | 6  |
| 6  | 645.32        | 323.17          |         |                  | 627.31         | 314.16           | V    | <b>678.39</b>  | 339.70          | 661.37        | 331.19           |                |                  | 5  |
| 7  | 808.39        | 404.70          |         |                  | 790.38         | 395.69           | Y    | <b>579.32</b>  | 290.17          | 562.30        | 281.65           |                |                  | 4  |
| 8  | 921.47        | 461.24          |         |                  | 903.46         | 452.23           | L    | <b>416.26</b>  | 208.63          | 399.24        | 200.12           |                |                  | 3  |
| 9  | 1049.53       | 525.27          | 1032.50 | 516.76           | 1031.52        | 516.26           | Q    | 303.18         | 152.09          | <b>286.15</b> | 143.58           |                |                  | 2  |
| 10 |               |                 |         |                  |                |                  | R    | <b>175.12</b>  | 88.06           | 158.09        | 79.55            |                |                  | 1  |

MS/MS Fragmentation of ID145 **IVDSAENLGEVLR**

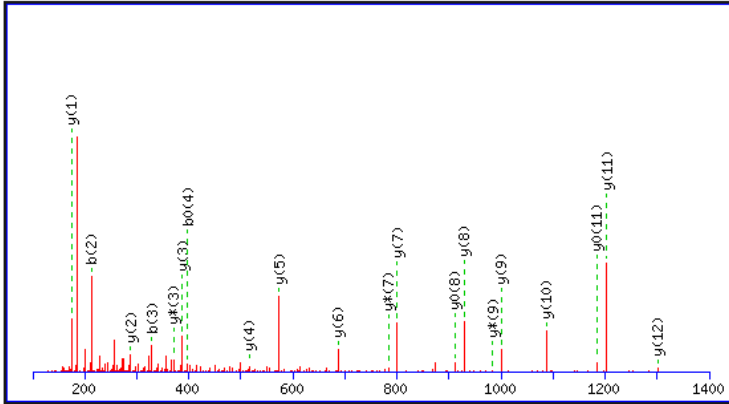

| #  | b             | b <sup>++</sup> | b*      | b <sup>*++</sup> | b <sup>0</sup> | b <sup>0++</sup> | Seq. | y              | y <sup>++</sup> | y*            | y <sup>*++</sup> | y <sup>0</sup> | y <sup>0++</sup> | #  |
|----|---------------|-----------------|---------|------------------|----------------|------------------|------|----------------|-----------------|---------------|------------------|----------------|------------------|----|
| 1  | 114.09        | 57.55           |         |                  |                |                  | I    |                |                 |               |                  |                |                  | 13 |
| 2  | <b>213.16</b> | 107.08          |         |                  |                |                  | V    | <b>1301.67</b> | 651.34          | 1284.64       | 642.83           | 1283.66        | 642.33           | 12 |
| 3  | <b>328.19</b> | 164.60          |         |                  | 310.18         | 155.59           | D    | <b>1202.60</b> | 601.80          | 1185.57       | 593.29           | <b>1184.59</b> | 592.80           | 11 |
| 4  | 415.22        | 208.11          |         |                  | <b>397.21</b>  | 199.11           | S    | <b>1087.57</b> | 544.29          | 1070.55       | 535.78           | 1069.56        | 535.29           | 10 |
| 5  | 486.26        | 243.63          |         |                  | 468.25         | 234.63           | A    | <b>1000.54</b> | 500.77          | <b>983.52</b> | 492.26           | 982.53         | 491.77           | 9  |
| 6  | 615.30        | 308.15          |         |                  | 597.29         | 299.15           | E    | <b>929.51</b>  | 465.26          | 912.48        | 456.74           | <b>911.49</b>  | 456.25           | 8  |
| 7  | 729.34        | 365.17          | 712.31  | 356.66           | 711.33         | 356.17           | N    | <b>800.46</b>  | 400.73          | <b>783.44</b> | 392.22           | 782.45         | 391.73           | 7  |
| 8  | 842.43        | 421.72          | 825.40  | 413.20           | 824.41         | 412.71           | L    | <b>686.42</b>  | 343.71          | 669.39        | 335.20           | 668.41         | 334.71           | 6  |
| 9  | 899.45        | 450.23          | 882.42  | 441.71           | 881.44         | 441.22           | G    | <b>573.34</b>  | 287.17          | 556.31        | 278.66           | 555.32         | 278.17           | 5  |
| 10 | 1028.49       | 514.75          | 1011.46 | 506.24           | 1010.48        | 505.74           | E    | <b>516.31</b>  | 258.66          | 499.29        | 250.15           | 498.30         | 249.66           | 4  |
| 11 | 1127.56       | 564.28          | 1110.53 | 555.77           | 1109.55        | 555.28           | V    | <b>387.27</b>  | 194.14          | <b>370.24</b> | 185.63           |                |                  | 3  |
| 12 | 1240.64       | 620.82          | 1223.62 | 612.31           | 1222.63        | 611.82           | L    | <b>288.20</b>  | 144.61          | 271.18        | 136.09           |                |                  | 2  |
| 13 |               |                 |         |                  |                |                  | R    | <b>175.12</b>  | 88.06           | 158.09        | 79.55            |                |                  | 1  |



MS/MS Fragmentation of ID146 **EIPQLPWYR**

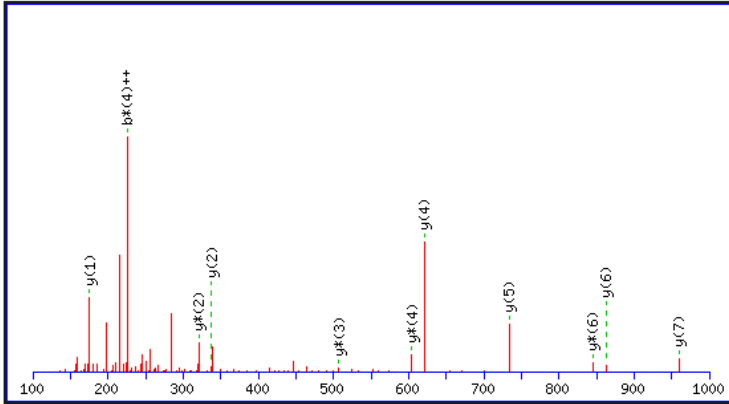

| #        | <b>b</b> | <b>b<sup>++</sup></b> | <b>b<sup>*</sup></b> | <b>b<sup>*++</sup></b> | <b>b<sup>0</sup></b> | <b>b<sup>0++</sup></b> | Seq.     | <b>y</b>      | <b>y<sup>++</sup></b> | <b>y<sup>*</sup></b> | <b>y<sup>*++</sup></b> | #        |
|----------|----------|-----------------------|----------------------|------------------------|----------------------|------------------------|----------|---------------|-----------------------|----------------------|------------------------|----------|
| <b>1</b> | 130.05   | 65.53                 |                      |                        | 112.04               | 56.52                  | <b>E</b> |               |                       |                      |                        | <b>9</b> |
| <b>2</b> | 243.13   | 122.07                |                      |                        | 225.12               | 113.07                 | <b>I</b> | 1072.59       | 536.80                | 1055.57              | 528.29                 | <b>8</b> |
| <b>3</b> | 340.19   | 170.60                |                      |                        | 322.18               | 161.59                 | <b>P</b> | <b>959.51</b> | 480.26                | 942.48               | 471.75                 | <b>7</b> |
| <b>4</b> | 468.25   | 234.63                | 451.22               | <b>226.11</b>          | 450.23               | 225.62                 | <b>Q</b> | <b>862.46</b> | 431.73                | <b>845.43</b>        | 423.22                 | <b>6</b> |
| <b>5</b> | 581.33   | 291.17                | 564.30               | 282.66                 | 563.32               | 282.16                 | <b>L</b> | <b>734.40</b> | 367.70                | 717.37               | 359.19                 | <b>5</b> |
| <b>6</b> | 678.38   | 339.69                | 661.36               | 331.18                 | 660.37               | 330.69                 | <b>P</b> | <b>621.31</b> | 311.16                | <b>604.29</b>        | 302.65                 | <b>4</b> |
| <b>7</b> | 864.46   | 432.73                | 847.43               | 424.22                 | 846.45               | 423.73                 | <b>W</b> | 524.26        | 262.63                | <b>507.24</b>        | 254.12                 | <b>3</b> |
| <b>8</b> | 1027.52  | 514.27                | 1010.50              | 505.75                 | 1009.51              | 505.26                 | <b>Y</b> | <b>338.18</b> | 169.59                | <b>321.16</b>        | 161.08                 | <b>2</b> |
| <b>9</b> |          |                       |                      |                        |                      |                        | <b>R</b> | <b>175.12</b> | 88.06                 | 158.09               | 79.55                  | <b>1</b> |

MS/MS Fragmentation of ID151 **QPIGTAAQAQDVK**

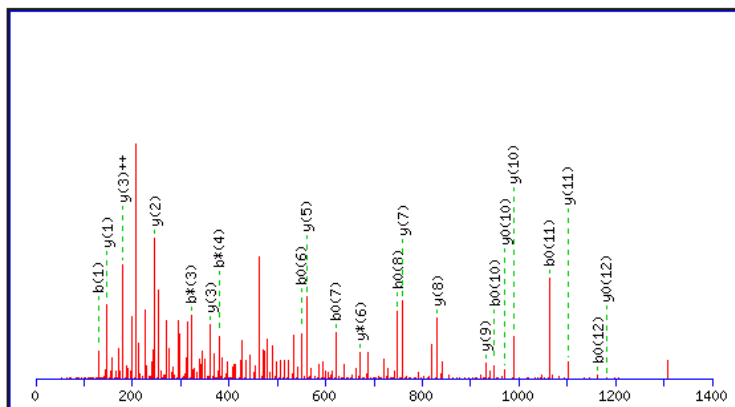

| #         | <b>b</b>      | <b>b<sup>++</sup></b> | <b>b*</b>     | <b>b<sup>***</sup></b> | <b>b<sup>0</sup></b> | <b>b<sup>0++</sup></b> | Seq.     | <b>y</b>       | <b>y<sup>++</sup></b> | <b>y*</b>     | <b>y<sup>***</sup></b> | <b>y<sup>0</sup></b> | <b>y<sup>0++</sup></b> | #         |
|-----------|---------------|-----------------------|---------------|------------------------|----------------------|------------------------|----------|----------------|-----------------------|---------------|------------------------|----------------------|------------------------|-----------|
| <b>1</b>  | <b>129.07</b> | 65.04                 | 112.04        | 56.52                  |                      |                        | <b>Q</b> |                |                       |               |                        |                      |                        | <b>13</b> |
| <b>2</b>  | 226.12        | 113.56                | 209.09        | 105.05                 |                      |                        | <b>P</b> | 1198.64        | 599.82                | 1181.62       | 591.31                 | <b>1180.63</b>       | 590.82                 | <b>12</b> |
| <b>3</b>  | 339.20        | 170.10                | <b>322.18</b> | 161.59                 |                      |                        | <b>I</b> | <b>1101.59</b> | 551.30                | 1084.56       | 542.79                 | 1083.58              | 542.29                 | <b>11</b> |
| <b>4</b>  | 396.22        | 198.62                | <b>379.20</b> | 190.10                 |                      |                        | <b>G</b> | <b>988.51</b>  | 494.76                | 971.48        | 486.24                 | <b>970.50</b>        | 485.75                 | <b>10</b> |
| <b>5</b>  | 497.27        | 249.14                | 480.25        | 240.63                 | 479.26               | 240.13                 | <b>T</b> | <b>931.48</b>  | 466.25                | 914.46        | 457.73                 | 913.47               | 457.24                 | <b>9</b>  |
| <b>6</b>  | 568.31        | 284.66                | 551.28        | 276.14                 | <b>550.30</b>        | 275.65                 | <b>A</b> | <b>830.44</b>  | 415.72                | 813.41        | 407.21                 | 812.43               | 406.72                 | <b>8</b>  |
| <b>7</b>  | 639.35        | 320.18                | 622.32        | 311.66                 | <b>621.34</b>        | 311.17                 | <b>A</b> | <b>759.40</b>  | 380.20                | 742.37        | 371.69                 | 741.39               | 371.20                 | <b>7</b>  |
| <b>8</b>  | 767.40        | 384.21                | 750.38        | 375.69                 | <b>749.39</b>        | 375.20                 | <b>Q</b> | 688.36         | 344.68                | <b>671.34</b> | 336.17                 | 670.35               | 335.68                 | <b>6</b>  |
| <b>9</b>  | 838.44        | 419.72                | 821.42        | 411.21                 | 820.43               | 410.72                 | <b>A</b> | <b>560.30</b>  | 280.66                | 543.28        | 272.14                 | 542.29               | 271.65                 | <b>5</b>  |
| <b>10</b> | 966.50        | 483.75                | 949.47        | 475.24                 | <b>948.49</b>        | 474.75                 | <b>Q</b> | 489.27         | 245.14                | 472.24        | 236.62                 | 471.26               | 236.13                 | <b>4</b>  |
| <b>11</b> | 1081.53       | 541.27                | 1064.50       | 532.75                 | <b>1063.52</b>       | 532.26                 | <b>D</b> | <b>361.21</b>  | <b>181.11</b>         | 344.18        | 172.59                 | 343.20               | 172.10                 | <b>3</b>  |
| <b>12</b> | 1180.60       | 590.80                | 1163.57       | 582.29                 | <b>1162.59</b>       | 581.80                 | <b>V</b> | <b>246.18</b>  | 123.59                | 229.15        | 115.08                 |                      |                        | <b>2</b>  |
| <b>13</b> |               |                       |               |                        |                      |                        | <b>K</b> | <b>147.11</b>  | 74.06                 | 130.09        | 65.55                  |                      |                        | <b>1</b>  |

MS/MS Fragmentation of ID154 **SFGAAVIYNNKK**

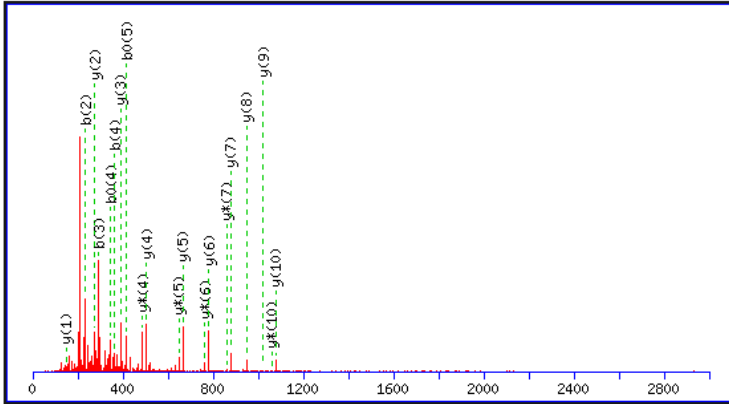

| #         | <b>b</b>      | <b>b<sup>++</sup></b> | <b>b<sup>*</sup></b> | <b>b<sup>*++</sup></b> | <b>b<sup>0</sup></b> | <b>b<sup>0++</sup></b> | Seq.     | <b>y</b>       | <b>y<sup>++</sup></b> | <b>y<sup>*</sup></b> | <b>y<sup>*++</sup></b> | #         |
|-----------|---------------|-----------------------|----------------------|------------------------|----------------------|------------------------|----------|----------------|-----------------------|----------------------|------------------------|-----------|
| <b>1</b>  | 88.04         | 44.52                 |                      |                        | 70.03                | 35.52                  | <b>S</b> |                |                       |                      |                        | <b>12</b> |
| <b>2</b>  | <b>235.11</b> | 118.06                |                      |                        | 217.10               | 109.05                 | <b>F</b> | 1224.67        | 612.84                | 1207.65              | 604.33                 | <b>11</b> |
| <b>3</b>  | <b>292.13</b> | 146.57                |                      |                        | 274.12               | 137.56                 | <b>G</b> | <b>1077.61</b> | 539.31                | <b>1060.58</b>       | 530.79                 | <b>10</b> |
| <b>4</b>  | <b>363.17</b> | 182.09                |                      |                        | <b>345.16</b>        | 173.08                 | <b>A</b> | <b>1020.58</b> | 510.80                | 1003.56              | 502.28                 | <b>9</b>  |
| <b>5</b>  | 434.20        | 217.61                |                      |                        | <b>416.19</b>        | 208.60                 | <b>A</b> | <b>949.55</b>  | 475.28                | 932.52               | 466.76                 | <b>8</b>  |
| <b>6</b>  | 533.27        | 267.14                |                      |                        | 515.26               | 258.13                 | <b>V</b> | <b>878.51</b>  | 439.76                | <b>861.48</b>        | 431.25                 | <b>7</b>  |
| <b>7</b>  | 646.36        | 323.68                |                      |                        | 628.35               | 314.68                 | <b>I</b> | <b>779.44</b>  | 390.22                | <b>762.41</b>        | 381.71                 | <b>6</b>  |
| <b>8</b>  | 809.42        | 405.21                |                      |                        | 791.41               | 396.21                 | <b>Y</b> | <b>666.36</b>  | 333.68                | <b>649.33</b>        | 325.17                 | <b>5</b>  |
| <b>9</b>  | 923.46        | 462.23                | 906.44               | 453.72                 | 905.45               | 453.23                 | <b>N</b> | <b>503.29</b>  | 252.15                | <b>486.27</b>        | 243.64                 | <b>4</b>  |
| <b>10</b> | 1037.51       | 519.26                | 1020.48              | 510.74                 | 1019.49              | 510.25                 | <b>N</b> | <b>389.25</b>  | 195.13                | 372.22               | 186.62                 | <b>3</b>  |
| <b>11</b> | 1165.60       | 583.30                | 1148.57              | 574.79                 | 1147.59              | 574.30                 | <b>K</b> | <b>275.21</b>  | 138.11                | 258.18               | 129.59                 | <b>2</b>  |
| <b>12</b> |               |                       |                      |                        |                      |                        | <b>K</b> | <b>147.11</b>  | 74.06                 | 130.09               | 65.55                  | <b>1</b>  |

MS/MS Fragmentation of ID156 **SFGAAVIINDKK**

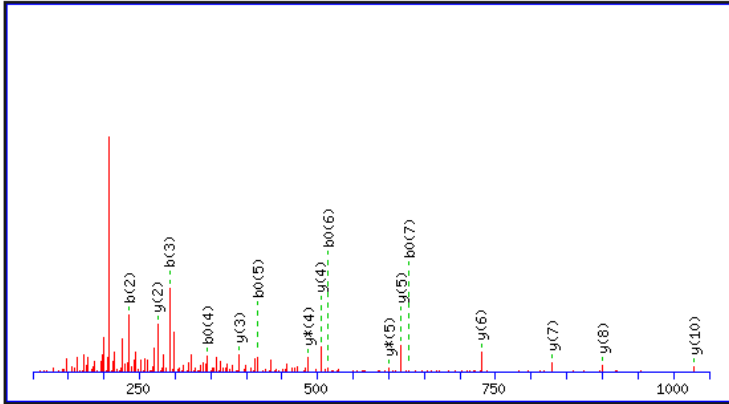

| #  | b             | b <sup>++</sup> | b <sup>*</sup> | b <sup>*++</sup> | b <sup>0</sup> | b <sup>0++</sup> | Seq. | y              | y <sup>++</sup> | y <sup>*</sup> | y <sup>*++</sup> | y <sup>0</sup> | y <sup>0++</sup> | #  |
|----|---------------|-----------------|----------------|------------------|----------------|------------------|------|----------------|-----------------|----------------|------------------|----------------|------------------|----|
| 1  | 88.04         | 44.52           |                |                  | 70.03          | 35.52            | S    |                |                 |                |                  |                |                  | 12 |
| 2  | <b>235.11</b> | 118.06          |                |                  | 217.10         | 109.05           | F    | 1175.68        | 588.34          | 1158.65        | 579.83           | 1157.67        | 579.34           | 11 |
| 3  | <b>292.13</b> | 146.57          |                |                  | 274.12         | 137.56           | G    | <b>1028.61</b> | 514.81          | 1011.58        | 506.30           | 1010.60        | 505.80           | 10 |
| 4  | 363.17        | 182.09          |                |                  | <b>345.16</b>  | 173.08           | A    | 971.59         | 486.30          | 954.56         | 477.78           | 953.58         | 477.29           | 9  |
| 5  | 434.20        | 217.61          |                |                  | <b>416.19</b>  | 208.60           | A    | <b>900.55</b>  | 450.78          | 883.52         | 442.27           | 882.54         | 441.77           | 8  |
| 6  | 533.27        | 267.14          |                |                  | <b>515.26</b>  | 258.13           | V    | <b>829.51</b>  | 415.26          | 812.49         | 406.75           | 811.50         | 406.26           | 7  |
| 7  | 646.36        | 323.68          |                |                  | <b>628.35</b>  | 314.68           | I    | <b>730.45</b>  | 365.73          | 713.42         | 357.21           | 712.44         | 356.72           | 6  |
| 8  | 759.44        | 380.22          |                |                  | 741.43         | 371.22           | I    | <b>617.36</b>  | 309.18          | <b>600.34</b>  | 300.67           | 599.35         | 300.18           | 5  |
| 9  | 873.48        | 437.25          | 856.46         | 428.73           | 855.47         | 428.24           | N    | <b>504.28</b>  | 252.64          | <b>487.25</b>  | 244.13           | 486.27         | 243.64           | 4  |
| 10 | 988.51        | 494.76          | 971.48         | 486.25           | 970.50         | 485.75           | D    | <b>390.23</b>  | 195.62          | 373.21         | 187.11           | 372.22         | 186.62           | 3  |
| 11 | 1116.60       | 558.81          | 1099.58        | 550.29           | 1098.59        | 549.80           | K    | <b>275.21</b>  | 138.11          | 258.18         | 129.59           |                |                  | 2  |
| 12 |               |                 |                |                  |                |                  | K    | 147.11         | 74.06           | 130.09         | 65.55            |                |                  | 1  |

MS/MS Fragmentation of ID158 **NIAVGHYHEATQPDALR**

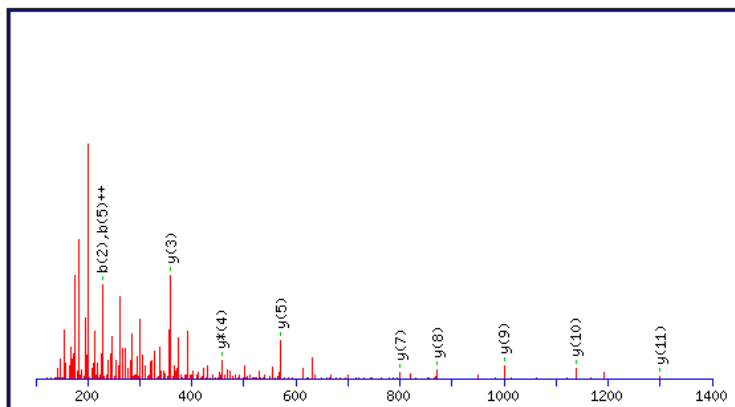

| #  | b             | b <sup>++</sup> | b*      | b <sup>*++</sup> | b <sup>0</sup> | b <sup>0++</sup> | Seq. | y              | y <sup>++</sup> | y*            | y <sup>*++</sup> | y <sup>0</sup> | y <sup>0++</sup> | #  |
|----|---------------|-----------------|---------|------------------|----------------|------------------|------|----------------|-----------------|---------------|------------------|----------------|------------------|----|
| 1  | 115.05        | 58.03           | 98.02   | 49.52            |                |                  | N    |                |                 |               |                  |                |                  | 17 |
| 2  | <b>228.13</b> | 114.57          | 211.11  | 106.06           |                |                  | I    | 1777.90        | 889.45          | 1760.87       | 880.94           | 1759.89        | 880.45           | 16 |
| 3  | 299.17        | 150.09          | 282.14  | 141.58           |                |                  | A    | 1664.81        | 832.91          | 1647.79       | 824.40           | 1646.80        | 823.91           | 15 |
| 4  | 398.24        | 199.62          | 381.21  | 191.11           |                |                  | V    | 1593.78        | 797.39          | 1576.75       | 788.88           | 1575.77        | 788.39           | 14 |
| 5  | 455.26        | <b>228.13</b>   | 438.23  | 219.62           |                |                  | G    | 1494.71        | 747.86          | 1477.68       | 739.34           | 1476.70        | 738.85           | 13 |
| 6  | 592.32        | 296.66          | 575.29  | 288.15           |                |                  | H    | 1437.69        | 719.35          | 1420.66       | 710.83           | 1419.68        | 710.34           | 12 |
| 7  | 755.38        | 378.20          | 738.36  | 369.68           |                |                  | Y    | <b>1300.63</b> | 650.82          | 1283.60       | 642.30           | 1282.62        | 641.81           | 11 |
| 8  | 892.44        | 446.72          | 875.42  | 438.21           |                |                  | H    | <b>1137.56</b> | 569.29          | 1120.54       | 560.77           | 1119.55        | 560.28           | 10 |
| 9  | 1021.48       | 511.25          | 1004.46 | 502.73           | 1003.47        | 502.24           | E    | <b>1000.51</b> | 500.76          | 983.48        | 492.24           | 982.50         | 491.75           | 9  |
| 10 | 1092.52       | 546.76          | 1075.50 | 538.25           | 1074.51        | 537.76           | A    | <b>871.46</b>  | 436.24          | 854.44        | 427.72           | 853.45         | 427.23           | 8  |
| 11 | 1193.57       | 597.29          | 1176.54 | 588.78           | 1175.56        | 588.28           | T    | <b>800.43</b>  | 400.72          | 783.40        | 392.20           | 782.42         | 391.71           | 7  |
| 12 | 1321.63       | 661.32          | 1304.60 | 652.80           | 1303.62        | 652.31           | Q    | 699.38         | 350.19          | 682.35        | 341.68           | 681.37         | 341.19           | 6  |
| 13 | 1418.68       | 709.84          | 1401.65 | 701.33           | 1400.67        | 700.84           | P    | <b>571.32</b>  | 286.16          | 554.29        | 277.65           | 553.31         | 277.16           | 5  |
| 14 | 1533.71       | 767.36          | 1516.68 | 758.84           | 1515.70        | 758.35           | D    | 474.27         | 237.64          | <b>457.24</b> | 229.12           | 456.26         | 228.63           | 4  |
| 15 | 1604.75       | 802.88          | 1587.72 | 794.36           | 1586.73        | 793.87           | A    | <b>359.24</b>  | 180.12          | 342.21        | 171.61           |                |                  | 3  |
| 16 | 1717.83       | 859.42          | 1700.80 | 850.90           | 1699.82        | 850.41           | L    | 288.20         | 144.61          | 271.18        | 136.09           |                |                  | 2  |
| 17 |               |                 |         |                  |                |                  | R    | 175.12         | 88.06           | 158.09        | 79.55            |                |                  | 1  |

MS/MS Fragmentation of ID160 **MEKPLLGESSGGR**

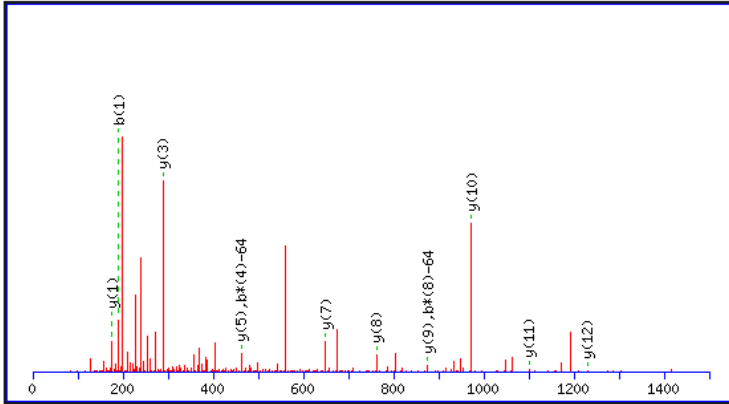

| #  | b             | b <sup>++</sup> | b*      | b <sup>*++</sup> | b <sup>0</sup> | b <sup>0++</sup> | Seq.     | y              | y <sup>++</sup> | y*      | y <sup>*++</sup> | y <sup>0</sup> | y <sup>0++</sup> | #         |
|----|---------------|-----------------|---------|------------------|----------------|------------------|----------|----------------|-----------------|---------|------------------|----------------|------------------|-----------|
| 1  | <b>190.05</b> | 95.53           |         |                  |                |                  | <b>M</b> |                |                 |         |                  |                |                  | <b>13</b> |
| 2  | 319.10        | 160.05          |         |                  | 301.09         | 151.05           | <b>E</b> | <b>1229.65</b> | 615.33          | 1212.62 | 606.81           | 1211.64        | 606.32           | <b>12</b> |
| 3  | 447.19        | 224.10          | 430.16  | 215.59           | 429.18         | 215.09           | <b>K</b> | <b>1100.61</b> | 550.81          | 1083.58 | 542.29           | 1082.60        | 541.80           | <b>11</b> |
| 4  | 544.24        | 272.63          | 527.22  | 264.11           | 526.23         | 263.62           | <b>P</b> | <b>972.51</b>  | 486.76          | 955.48  | 478.25           | 954.50         | 477.75           | <b>10</b> |
| 5  | 657.33        | 329.17          | 640.30  | 320.65           | 639.32         | 320.16           | <b>L</b> | <b>875.46</b>  | 438.23          | 858.43  | 429.72           | 857.45         | 429.23           | <b>9</b>  |
| 6  | 770.41        | 385.71          | 753.39  | 377.20           | 752.40         | 376.70           | <b>L</b> | <b>762.37</b>  | 381.69          | 745.35  | 373.18           | 744.36         | 372.69           | <b>8</b>  |
| 7  | 827.43        | 414.22          | 810.41  | 405.71           | 809.42         | 405.21           | <b>G</b> | <b>649.29</b>  | 325.15          | 632.26  | 316.64           | 631.28         | 316.14           | <b>7</b>  |
| 8  | 956.48        | 478.74          | 939.45  | 470.23           | 938.47         | 469.74           | <b>E</b> | 592.27         | 296.64          | 575.24  | 288.12           | 574.26         | 287.63           | <b>6</b>  |
| 9  | 1043.51       | 522.26          | 1026.48 | 513.74           | 1025.50        | 513.25           | <b>S</b> | <b>463.23</b>  | 232.12          | 446.20  | 223.60           | 445.22         | 223.11           | <b>5</b>  |
| 10 | 1130.54       | 565.77          | 1113.51 | 557.26           | 1112.53        | 556.77           | <b>S</b> | 376.19         | 188.60          | 359.17  | 180.09           | 358.18         | 179.60           | <b>4</b>  |
| 11 | 1187.56       | 594.28          | 1170.53 | 585.77           | 1169.55        | 585.28           | <b>G</b> | <b>289.16</b>  | 145.08          | 272.14  | 136.57           |                |                  | <b>3</b>  |
| 12 | 1244.58       | 622.79          | 1227.56 | 614.28           | 1226.57        | 613.79           | <b>G</b> | 232.14         | 116.57          | 215.11  | 108.06           |                |                  | <b>2</b>  |
| 13 |               |                 |         |                  |                |                  | <b>R</b> | <b>175.12</b>  | 88.06           | 158.09  | 79.55            |                |                  | <b>1</b>  |

MS/MS Fragmentation of ID161 **GPLQIFQGI EK**

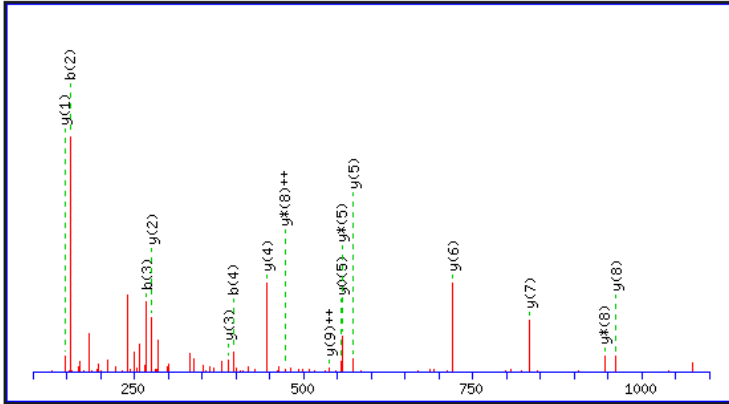

| #  | b             | b <sup>++</sup> | b*      | b <sup>*++</sup> | b <sup>0</sup> | b <sup>0++</sup> | Seq. | y             | y <sup>++</sup> | y*            | y <sup>*++</sup> | y <sup>0</sup> | y <sup>0++</sup> | #  |
|----|---------------|-----------------|---------|------------------|----------------|------------------|------|---------------|-----------------|---------------|------------------|----------------|------------------|----|
| 1  | 58.03         | 29.52           |         |                  |                |                  | G    |               |                 |               |                  |                |                  | 11 |
| 2  | <b>155.08</b> | 78.04           |         |                  |                |                  | P    | 1172.67       | 586.84          | 1155.64       | 578.32           | 1154.66        | 577.83           | 10 |
| 3  | <b>268.17</b> | 134.59          |         |                  |                |                  | L    | 1075.61       | <b>538.31</b>   | 1058.59       | 529.80           | 1057.60        | 529.31           | 9  |
| 4  | <b>396.22</b> | 198.62          | 379.20  | 190.10           |                |                  | Q    | <b>962.53</b> | 481.77          | <b>945.50</b> | <b>473.26</b>    | 944.52         | 472.76           | 8  |
| 5  | 509.31        | 255.16          | 492.28  | 246.64           |                |                  | I    | <b>834.47</b> | 417.74          | 817.45        | 409.23           | 816.46         | 408.73           | 7  |
| 6  | 656.38        | 328.69          | 639.35  | 320.18           |                |                  | F    | <b>721.39</b> | 361.20          | 704.36        | 352.68           | 703.38         | 352.19           | 6  |
| 7  | 784.44        | 392.72          | 767.41  | 384.21           |                |                  | Q    | <b>574.32</b> | 287.66          | <b>557.29</b> | 279.15           | <b>556.31</b>  | 278.66           | 5  |
| 8  | 841.46        | 421.23          | 824.43  | 412.72           |                |                  | G    | <b>446.26</b> | 223.63          | 429.23        | 215.12           | 428.25         | 214.63           | 4  |
| 9  | 954.54        | 477.77          | 937.51  | 469.26           |                |                  | I    | <b>389.24</b> | 195.12          | 372.21        | 186.61           | 371.23         | 186.12           | 3  |
| 10 | 1083.58       | 542.30          | 1066.56 | 533.78           | 1065.57        | 533.29           | E    | <b>276.16</b> | 138.58          | 259.13        | 130.07           | 258.14         | 129.58           | 2  |
| 11 |               |                 |         |                  |                |                  | K    | <b>147.11</b> | 74.06           | 130.09        | 65.55            |                |                  | 1  |

MS/MS Fragmentation of ID163 **GVGGILLEFAGIK**

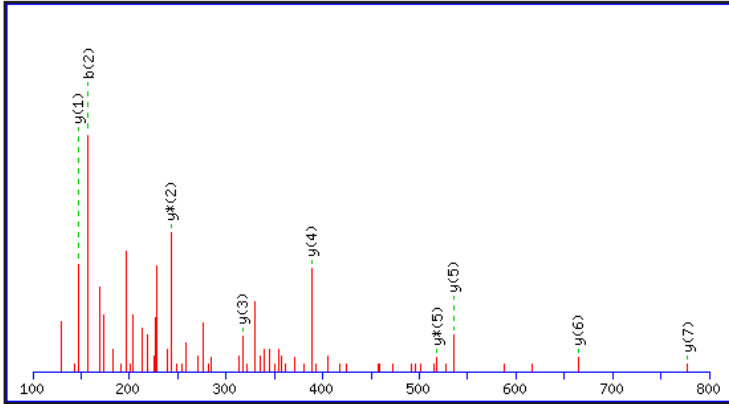

| #  | b       | b <sup>++</sup> | b <sup>0</sup> | b <sup>0++</sup> | Seq. | y       | y <sup>++</sup> | y*      | y <sup>*++</sup> | y <sup>0</sup> | y <sup>0++</sup> | #  |
|----|---------|-----------------|----------------|------------------|------|---------|-----------------|---------|------------------|----------------|------------------|----|
| 1  | 58.03   | 29.52           |                |                  | G    |         |                 |         |                  |                |                  | 12 |
| 2  | 157.10  | 79.05           |                |                  | V    | 1103.65 | 552.33          | 1086.62 | 543.81           | 1085.64        | 543.32           | 11 |
| 3  | 214.12  | 107.56          |                |                  | G    | 1004.58 | 502.79          | 987.55  | 494.28           | 986.57         | 493.79           | 10 |
| 4  | 271.14  | 136.07          |                |                  | G    | 947.56  | 474.28          | 930.53  | 465.77           | 929.55         | 465.28           | 9  |
| 5  | 384.22  | 192.62          |                |                  | L    | 890.53  | 445.77          | 873.51  | 437.26           | 872.52         | 436.77           | 8  |
| 6  | 497.31  | 249.16          |                |                  | L    | 777.45  | 389.23          | 760.42  | 380.72           | 759.44         | 380.22           | 7  |
| 7  | 626.35  | 313.68          | 608.34         | 304.67           | E    | 664.37  | 332.69          | 647.34  | 324.17           | 646.36         | 323.68           | 6  |
| 8  | 773.42  | 387.21          | 755.41         | 378.21           | F    | 535.32  | 268.17          | 518.30  | 259.65           |                |                  | 5  |
| 9  | 844.46  | 422.73          | 826.45         | 413.73           | A    | 388.26  | 194.63          | 371.23  | 186.12           |                |                  | 4  |
| 10 | 901.48  | 451.24          | 883.47         | 442.24           | G    | 317.22  | 159.11          | 300.19  | 150.60           |                |                  | 3  |
| 11 | 1014.56 | 507.78          | 996.55         | 498.78           | I    | 260.20  | 130.60          | 243.17  | 122.09           |                |                  | 2  |
| 12 |         |                 |                |                  | K    | 147.11  | 74.06           | 130.09  | 65.55            |                |                  | 1  |



MS/MS Fragmentation of ID164 **LLGLAQNK**

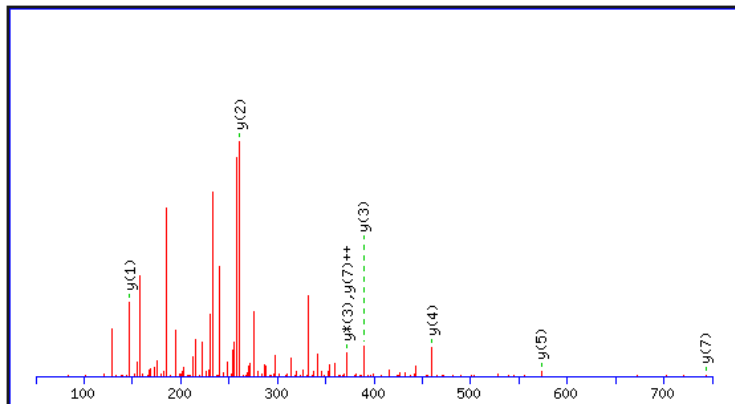

| #        | <b>b</b> | <b>b<sup>++</sup></b> | <b>b<sup>*</sup></b> | <b>b<sup>*++</sup></b> | Seq.     | <b>y</b>      | <b>y<sup>++</sup></b> | <b>y<sup>*</sup></b> | <b>y<sup>*++</sup></b> | #        |
|----------|----------|-----------------------|----------------------|------------------------|----------|---------------|-----------------------|----------------------|------------------------|----------|
| <b>1</b> | 114.09   | 57.55                 |                      |                        | <b>L</b> |               |                       |                      |                        | <b>8</b> |
| <b>2</b> | 227.18   | 114.09                |                      |                        | <b>L</b> | <b>743.44</b> | <b>372.22</b>         | 726.41               | 363.71                 | <b>7</b> |
| <b>3</b> | 284.20   | 142.60                |                      |                        | <b>G</b> | 630.36        | 315.68                | 613.33               | 307.17                 | <b>6</b> |
| <b>4</b> | 397.28   | 199.14                |                      |                        | <b>L</b> | <b>573.34</b> | 287.17                | 556.31               | 278.66                 | <b>5</b> |
| <b>5</b> | 468.32   | 234.66                |                      |                        | <b>A</b> | <b>460.25</b> | 230.63                | 443.22               | 222.12                 | <b>4</b> |
| <b>6</b> | 596.38   | 298.69                | 579.35               | 290.18                 | <b>Q</b> | <b>389.21</b> | 195.11                | <b>372.19</b>        | 186.60                 | <b>3</b> |
| <b>7</b> | 710.42   | 355.71                | 693.39               | 347.20                 | <b>N</b> | <b>261.16</b> | 131.08                | 244.13               | 122.57                 | <b>2</b> |
| <b>8</b> |          |                       |                      |                        | <b>K</b> | <b>147.11</b> | 74.06                 | 130.09               | 65.55                  | <b>1</b> |

MS/MS Fragmentation of ID166 **GETPEQILDAR**

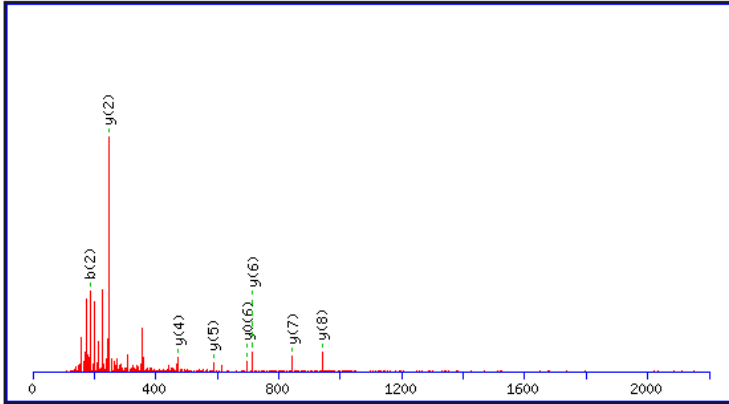

| #         | <b>b</b>      | <b>b<sup>++</sup></b> | <b>b<sup>*</sup></b> | <b>b<sup>*++</sup></b> | <b>b<sup>0</sup></b> | <b>b<sup>0++</sup></b> | Seq.     | <b>y</b>      | <b>y<sup>++</sup></b> | <b>y<sup>*</sup></b> | <b>y<sup>*++</sup></b> | <b>y<sup>0</sup></b> | <b>y<sup>0++</sup></b> | #         |
|-----------|---------------|-----------------------|----------------------|------------------------|----------------------|------------------------|----------|---------------|-----------------------|----------------------|------------------------|----------------------|------------------------|-----------|
| <b>1</b>  | 58.03         | 29.52                 |                      |                        |                      |                        | <b>G</b> |               |                       |                      |                        |                      |                        | <b>11</b> |
| <b>2</b>  | <b>187.07</b> | 94.04                 |                      |                        | 169.06               | 85.03                  | <b>E</b> | 1171.60       | 586.30                | 1154.57              | 577.79                 | 1153.58              | 577.30                 | <b>10</b> |
| <b>3</b>  | 288.12        | 144.56                |                      |                        | 270.11               | 135.56                 | <b>T</b> | 1042.55       | 521.78                | 1025.53              | 513.27                 | 1024.54              | 512.77                 | <b>9</b>  |
| <b>4</b>  | 385.17        | 193.09                |                      |                        | 367.16               | 184.08                 | <b>P</b> | <b>941.51</b> | 471.26                | 924.48               | 462.74                 | 923.49               | 462.25                 | <b>8</b>  |
| <b>5</b>  | 514.21        | 257.61                |                      |                        | 496.20               | 248.61                 | <b>E</b> | <b>844.45</b> | 422.73                | 827.43               | 414.22                 | 826.44               | 413.72                 | <b>7</b>  |
| <b>6</b>  | 642.27        | 321.64                | 625.25               | 313.13                 | 624.26               | 312.63                 | <b>Q</b> | <b>715.41</b> | 358.21                | 698.38               | 349.70                 | <b>697.40</b>        | 349.20                 | <b>6</b>  |
| <b>7</b>  | 755.36        | 378.18                | 738.33               | 369.67                 | 737.35               | 369.18                 | <b>I</b> | <b>587.35</b> | 294.18                | 570.32               | 285.67                 | 569.34               | 285.17                 | <b>5</b>  |
| <b>8</b>  | 868.44        | 434.72                | 851.41               | 426.21                 | 850.43               | 425.72                 | <b>L</b> | <b>474.27</b> | 237.64                | 457.24               | 229.12                 | 456.26               | 228.63                 | <b>4</b>  |
| <b>9</b>  | 983.47        | 492.24                | 966.44               | 483.72                 | 965.46               | 483.23                 | <b>D</b> | 361.18        | 181.10                | 344.16               | 172.58                 | 343.17               | 172.09                 | <b>3</b>  |
| <b>10</b> | 1054.51       | 527.76                | 1037.48              | 519.24                 | 1036.49              | 518.75                 | <b>A</b> | <b>246.16</b> | 123.58                | 229.13               | 115.07                 |                      |                        | <b>2</b>  |
| <b>11</b> |               |                       |                      |                        |                      |                        | <b>R</b> | 175.12        | 88.06                 | 158.09               | 79.55                  |                      |                        | <b>1</b>  |

MS/MS Fragmentation of ID168 **LLTFVDLSR**

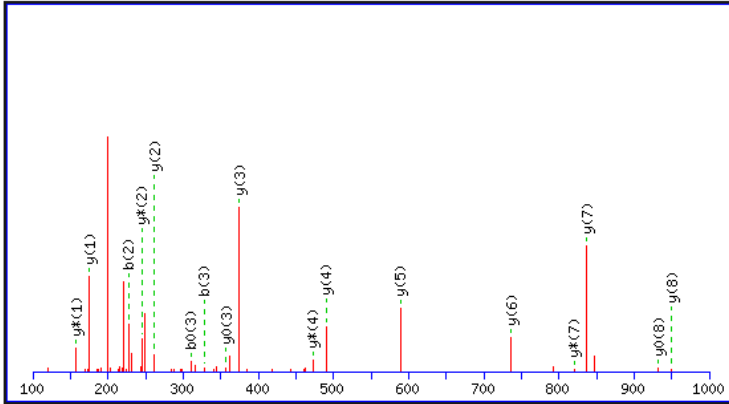

| # | <b>b</b>      | <b>b<sup>++</sup></b> | <b>b<sup>0</sup></b> | <b>b<sup>0++</sup></b> | <b>Seq.</b> | <b>y</b>      | <b>y<sup>++</sup></b> | <b>y<sup>*</sup></b> | <b>y<sup>***</sup></b> | <b>y<sup>0</sup></b> | <b>y<sup>0++</sup></b> | #        |
|---|---------------|-----------------------|----------------------|------------------------|-------------|---------------|-----------------------|----------------------|------------------------|----------------------|------------------------|----------|
| 1 | 114.09        | 57.55                 |                      |                        | <b>L</b>    |               |                       |                      |                        |                      |                        | <b>9</b> |
| 2 | <b>227.18</b> | 114.09                |                      |                        | <b>L</b>    | <b>950.53</b> | 475.77                | 933.50               | 467.26                 | <b>932.52</b>        | 466.76                 | <b>8</b> |
| 3 | <b>328.22</b> | 164.62                | <b>310.21</b>        | 155.61                 | <b>T</b>    | <b>837.45</b> | 419.23                | <b>820.42</b>        | 410.71                 | 819.44               | 410.22                 | <b>7</b> |
| 4 | 475.29        | 238.15                | 457.28               | 229.14                 | <b>F</b>    | <b>736.40</b> | 368.70                | 719.37               | 360.19                 | 718.39               | 359.70                 | <b>6</b> |
| 5 | 574.36        | 287.68                | 556.35               | 278.68                 | <b>V</b>    | <b>589.33</b> | 295.17                | 572.30               | 286.66                 | 571.32               | 286.16                 | <b>5</b> |
| 6 | 689.39        | 345.20                | 671.38               | 336.19                 | <b>D</b>    | <b>490.26</b> | 245.63                | <b>473.24</b>        | 237.12                 | 472.25               | 236.63                 | <b>4</b> |
| 7 | 802.47        | 401.74                | 784.46               | 392.73                 | <b>L</b>    | <b>375.24</b> | 188.12                | 358.21               | 179.61                 | <b>357.22</b>        | 179.12                 | <b>3</b> |
| 8 | 889.50        | 445.26                | 871.49               | 436.25                 | <b>S</b>    | <b>262.15</b> | 131.58                | <b>245.12</b>        | 123.07                 | 244.14               | 122.57                 | <b>2</b> |
| 9 |               |                       |                      |                        | <b>R</b>    | <b>175.12</b> | 88.06                 | <b>158.09</b>        | 79.55                  |                      |                        | <b>1</b> |

MS/MS Fragmentation of ID171 **IPVALSSLPR**

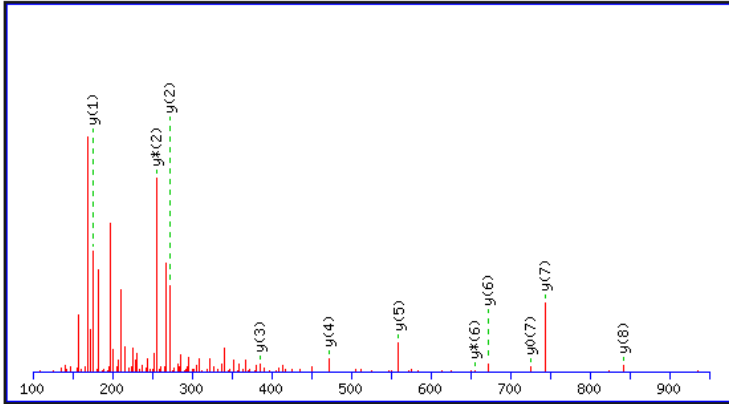

| #         | <b>b</b> | <b>b<sup>++</sup></b> | <b>b<sup>0</sup></b> | <b>b<sup>0++</sup></b> | Seq.     | <b>y</b>      | <b>y<sup>++</sup></b> | <b>y<sup>*</sup></b> | <b>y<sup>*++</sup></b> | <b>y<sup>0</sup></b> | <b>y<sup>0++</sup></b> | #         |
|-----------|----------|-----------------------|----------------------|------------------------|----------|---------------|-----------------------|----------------------|------------------------|----------------------|------------------------|-----------|
| <b>1</b>  | 114.09   | 57.55                 |                      |                        | <b>I</b> |               |                       |                      |                        |                      |                        | <b>10</b> |
| <b>2</b>  | 211.14   | 106.08                |                      |                        | <b>P</b> | 939.56        | 470.28                | 922.54               | 461.77                 | 921.55               | 461.28                 | <b>9</b>  |
| <b>3</b>  | 310.21   | 155.61                |                      |                        | <b>V</b> | <b>842.51</b> | 421.76                | 825.48               | 413.25                 | 824.50               | 412.75                 | <b>8</b>  |
| <b>4</b>  | 381.25   | 191.13                |                      |                        | <b>A</b> | <b>743.44</b> | 372.22                | 726.41               | 363.71                 | <b>725.43</b>        | 363.22                 | <b>7</b>  |
| <b>5</b>  | 494.33   | 247.67                |                      |                        | <b>L</b> | <b>672.40</b> | 336.71                | <b>655.38</b>        | 328.19                 | 654.39               | 327.70                 | <b>6</b>  |
| <b>6</b>  | 581.37   | 291.19                | 563.36               | 282.18                 | <b>S</b> | <b>559.32</b> | 280.16                | 542.29               | 271.65                 | 541.31               | 271.16                 | <b>5</b>  |
| <b>7</b>  | 668.40   | 334.70                | 650.39               | 325.70                 | <b>S</b> | <b>472.29</b> | 236.65                | 455.26               | 228.13                 | 454.28               | 227.64                 | <b>4</b>  |
| <b>8</b>  | 781.48   | 391.24                | 763.47               | 382.24                 | <b>L</b> | <b>385.26</b> | 193.13                | 368.23               | 184.62                 |                      |                        | <b>3</b>  |
| <b>9</b>  | 878.53   | 439.77                | 860.52               | 430.77                 | <b>P</b> | <b>272.17</b> | 136.59                | <b>255.15</b>        | 128.08                 |                      |                        | <b>2</b>  |
| <b>10</b> |          |                       |                      |                        | <b>R</b> | <b>175.12</b> | 88.06                 | 158.09               | 79.55                  |                      |                        | <b>1</b>  |

MS/MS Fragmentation of ID174 **LDALNTLSLR**

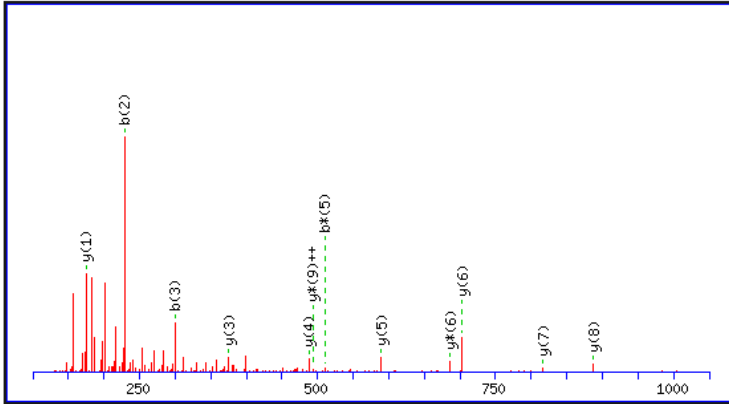

| #         | <b>b</b>      | <b>b<sup>++</sup></b> | <b>b<sup>*</sup></b> | <b>b<sup>*++</sup></b> | <b>b<sup>0</sup></b> | <b>b<sup>0++</sup></b> | Seq.     | <b>y</b>      | <b>y<sup>++</sup></b> | <b>y<sup>*</sup></b> | <b>y<sup>*++</sup></b> | <b>y<sup>0</sup></b> | <b>y<sup>0++</sup></b> | #         |
|-----------|---------------|-----------------------|----------------------|------------------------|----------------------|------------------------|----------|---------------|-----------------------|----------------------|------------------------|----------------------|------------------------|-----------|
| <b>1</b>  | 114.09        | 57.55                 |                      |                        |                      |                        | <b>L</b> |               |                       |                      |                        |                      |                        | <b>10</b> |
| <b>2</b>  | <b>229.12</b> | 115.06                |                      |                        | 211.11               | 106.06                 | <b>D</b> | 1002.56       | 501.78                | 985.53               | <b>493.27</b>          | 984.55               | 492.78                 | <b>9</b>  |
| <b>3</b>  | <b>300.16</b> | 150.58                |                      |                        | 282.14               | 141.58                 | <b>A</b> | <b>887.53</b> | 444.27                | 870.50               | 435.76                 | 869.52               | 435.26                 | <b>8</b>  |
| <b>4</b>  | 413.24        | 207.12                |                      |                        | 395.23               | 198.12                 | <b>L</b> | <b>816.49</b> | 408.75                | 799.47               | 400.24                 | 798.48               | 399.75                 | <b>7</b>  |
| <b>5</b>  | 527.28        | 264.14                | <b>510.26</b>        | 255.63                 | 509.27               | 255.14                 | <b>N</b> | <b>703.41</b> | 352.21                | <b>686.38</b>        | 343.70                 | 685.40               | 343.20                 | <b>6</b>  |
| <b>6</b>  | 628.33        | 314.67                | 611.30               | 306.16                 | 610.32               | 305.66                 | <b>T</b> | <b>589.37</b> | 295.19                | 572.34               | 286.67                 | 571.36               | 286.18                 | <b>5</b>  |
| <b>7</b>  | 741.41        | 371.21                | 724.39               | 362.70                 | 723.40               | 362.21                 | <b>L</b> | <b>488.32</b> | 244.66                | 471.29               | 236.15                 | 470.31               | 235.66                 | <b>4</b>  |
| <b>8</b>  | 828.45        | 414.73                | 811.42               | 406.21                 | 810.44               | 405.72                 | <b>S</b> | <b>375.24</b> | 188.12                | 358.21               | 179.61                 | 357.22               | 179.12                 | <b>3</b>  |
| <b>9</b>  | 941.53        | 471.27                | 924.50               | 462.76                 | 923.52               | 462.26                 | <b>L</b> | 288.20        | 144.61                | 271.18               | 136.09                 |                      |                        | <b>2</b>  |
| <b>10</b> |               |                       |                      |                        |                      |                        | <b>R</b> | <b>175.12</b> | 88.06                 | 158.09               | 79.55                  |                      |                        | <b>1</b>  |

MS/MS Fragmentation of ID176 **IPADIGDIISLR**

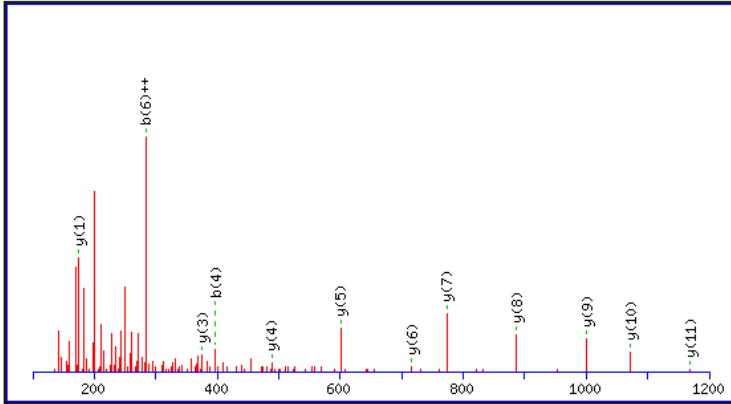

| #         | <b>b</b>      | <b>b<sup>++</sup></b> | <b>b<sup>0</sup></b> | <b>b<sup>0++</sup></b> | Seq.     | <b>y</b>       | <b>y<sup>++</sup></b> | <b>y<sup>*</sup></b> | <b>y<sup>*++</sup></b> | <b>y<sup>0</sup></b> | <b>y<sup>0++</sup></b> | #         |
|-----------|---------------|-----------------------|----------------------|------------------------|----------|----------------|-----------------------|----------------------|------------------------|----------------------|------------------------|-----------|
| <b>1</b>  | 114.09        | 57.55                 |                      |                        | <b>I</b> |                |                       |                      |                        |                      |                        | <b>12</b> |
| <b>2</b>  | 211.14        | 106.08                |                      |                        | <b>P</b> | <b>1169.65</b> | 585.33                | 1152.63              | 576.82                 | 1151.64              | 576.32                 | <b>11</b> |
| <b>3</b>  | 282.18        | 141.59                |                      |                        | <b>A</b> | <b>1072.60</b> | 536.80                | 1055.57              | 528.29                 | 1054.59              | 527.80                 | <b>10</b> |
| <b>4</b>  | <b>397.21</b> | 199.11                | 379.20               | 190.10                 | <b>D</b> | <b>1001.56</b> | 501.28                | 984.54               | 492.77                 | 983.55               | 492.28                 | <b>9</b>  |
| <b>5</b>  | 510.29        | 255.65                | 492.28               | 246.64                 | <b>I</b> | <b>886.54</b>  | 443.77                | 869.51               | 435.26                 | 868.53               | 434.77                 | <b>8</b>  |
| <b>6</b>  | 567.31        | <b>284.16</b>         | 549.30               | 275.16                 | <b>G</b> | <b>773.45</b>  | 387.23                | 756.43               | 378.72                 | 755.44               | 378.22                 | <b>7</b>  |
| <b>7</b>  | 682.34        | 341.67                | 664.33               | 332.67                 | <b>D</b> | <b>716.43</b>  | 358.72                | 699.40               | 350.21                 | 698.42               | 349.71                 | <b>6</b>  |
| <b>8</b>  | 795.42        | 398.22                | 777.41               | 389.21                 | <b>I</b> | <b>601.40</b>  | 301.21                | 584.38               | 292.69                 | 583.39               | 292.20                 | <b>5</b>  |
| <b>9</b>  | 908.51        | 454.76                | 890.50               | 445.75                 | <b>I</b> | <b>488.32</b>  | 244.66                | 471.29               | 236.15                 | 470.31               | 235.66                 | <b>4</b>  |
| <b>10</b> | 995.54        | 498.27                | 977.53               | 489.27                 | <b>S</b> | <b>375.24</b>  | 188.12                | 358.21               | 179.61                 | 357.22               | 179.12                 | <b>3</b>  |
| <b>11</b> | 1108.62       | 554.82                | 1090.61              | 545.81                 | <b>L</b> | 288.20         | 144.61                | 271.18               | 136.09                 |                      |                        | <b>2</b>  |
| <b>12</b> |               |                       |                      |                        | <b>R</b> | <b>175.12</b>  | 88.06                 | 158.09               | 79.55                  |                      |                        | <b>1</b>  |

MS/MS Fragmentation of ID188 **SANVLLDDDLVDR**

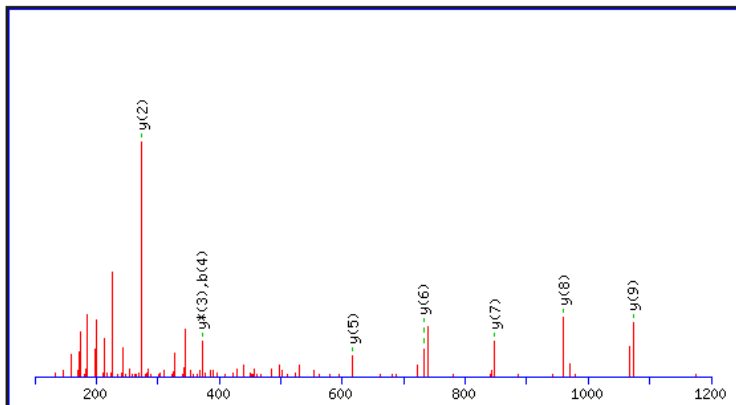

| #  | b             | b <sup>++</sup> | b*      | b <sup>*++</sup> | b <sup>0</sup> | b <sup>0++</sup> | Seq. | y              | y <sup>++</sup> | y*            | y <sup>*++</sup> | y <sup>0</sup> | y <sup>0++</sup> | #  |
|----|---------------|-----------------|---------|------------------|----------------|------------------|------|----------------|-----------------|---------------|------------------|----------------|------------------|----|
| 1  | 88.04         | 44.52           |         |                  | 70.03          | 35.52            | S    |                |                 |               |                  |                |                  | 13 |
| 2  | 159.08        | 80.04           |         |                  | 141.07         | 71.04            | A    | 1357.70        | 679.35          | 1340.67       | 670.84           | 1339.69        | 670.35           | 12 |
| 3  | 273.12        | 137.06          | 256.09  | 128.55           | 255.11         | 128.06           | N    | 1286.66        | 643.83          | 1269.63       | 635.32           | 1268.65        | 634.83           | 11 |
| 4  | <b>372.19</b> | 186.60          | 355.16  | 178.08           | 354.18         | 177.59           | V    | 1172.62        | 586.81          | 1155.59       | 578.30           | 1154.61        | 577.81           | 10 |
| 5  | 485.27        | 243.14          | 468.25  | 234.63           | 467.26         | 234.13           | L    | <b>1073.55</b> | 537.28          | 1056.52       | 528.76           | 1055.54        | 528.27           | 9  |
| 6  | 598.36        | 299.68          | 581.33  | 291.17           | 580.35         | 290.68           | L    | <b>960.46</b>  | 480.74          | 943.44        | 472.22           | 942.45         | 471.73           | 8  |
| 7  | 713.38        | 357.20          | 696.36  | 348.68           | 695.37         | 348.19           | D    | <b>847.38</b>  | 424.19          | 830.35        | 415.68           | 829.37         | 415.19           | 7  |
| 8  | 828.41        | 414.71          | 811.38  | 406.20           | 810.40         | 405.70           | D    | <b>732.35</b>  | 366.68          | 715.33        | 358.17           | 714.34         | 357.67           | 6  |
| 9  | 943.44        | 472.22          | 926.41  | 463.71           | 925.43         | 463.22           | D    | <b>617.33</b>  | 309.17          | 600.30        | 300.65           | 599.31         | 300.16           | 5  |
| 10 | 1056.52       | 528.76          | 1039.49 | 520.25           | 1038.51        | 519.76           | L    | 502.30         | 251.65          | 485.27        | 243.14           | 484.29         | 242.65           | 4  |
| 11 | 1171.55       | 586.28          | 1154.52 | 577.76           | 1153.54        | 577.27           | D    | 389.21         | 195.11          | <b>372.19</b> | 186.60           | 371.20         | 186.11           | 3  |
| 12 | 1270.62       | 635.81          | 1253.59 | 627.30           | 1252.61        | 626.81           | V    | <b>274.19</b>  | 137.60          | 257.16        | 129.08           |                |                  | 2  |
| 13 |               |                 |         |                  |                |                  | R    | 175.12         | 88.06           | 158.09        | 79.55            |                |                  | 1  |

MS/MS Fragmentation of ID190 **LLVYEYLENK**

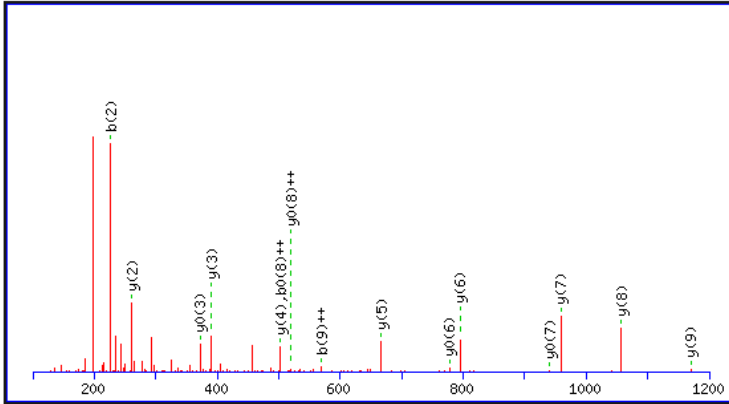

| #         | <b>b</b>      | <b>b<sup>++</sup></b> | <b>b*</b> | <b>b<sup>+++</sup></b> | <b>b<sup>0</sup></b> | <b>b<sup>0++</sup></b> | Seq.     | <b>y</b>       | <b>y<sup>++</sup></b> | <b>y*</b> | <b>y<sup>+++</sup></b> | <b>y<sup>0</sup></b> | <b>y<sup>0++</sup></b> | #         |
|-----------|---------------|-----------------------|-----------|------------------------|----------------------|------------------------|----------|----------------|-----------------------|-----------|------------------------|----------------------|------------------------|-----------|
| <b>1</b>  | 114.09        | 57.55                 |           |                        |                      |                        | <b>L</b> |                |                       |           |                        |                      |                        | <b>10</b> |
| <b>2</b>  | <b>227.18</b> | 114.09                |           |                        |                      |                        | <b>L</b> | <b>1170.60</b> | 585.81                | 1153.58   | 577.29                 | 1152.59              | 576.80                 | <b>9</b>  |
| <b>3</b>  | 326.24        | 163.63                |           |                        |                      |                        | <b>V</b> | <b>1057.52</b> | 529.26                | 1040.49   | 520.75                 | 1039.51              | <b>520.26</b>          | <b>8</b>  |
| <b>4</b>  | 489.31        | 245.16                |           |                        |                      |                        | <b>Y</b> | <b>958.45</b>  | 479.73                | 941.43    | 471.22                 | <b>940.44</b>        | 470.72                 | <b>7</b>  |
| <b>5</b>  | 618.35        | 309.68                |           |                        | 600.34               | 300.67                 | <b>E</b> | <b>795.39</b>  | 398.20                | 778.36    | 389.68                 | <b>777.38</b>        | 389.19                 | <b>6</b>  |
| <b>6</b>  | 781.41        | 391.21                |           |                        | 763.40               | 382.20                 | <b>Y</b> | <b>666.35</b>  | 333.68                | 649.32    | 325.16                 | 648.34               | 324.67                 | <b>5</b>  |
| <b>7</b>  | 894.50        | 447.75                |           |                        | 876.49               | 438.75                 | <b>L</b> | <b>503.28</b>  | 252.14                | 486.26    | 243.63                 | 485.27               | 243.14                 | <b>4</b>  |
| <b>8</b>  | 1023.54       | 512.27                |           |                        | 1005.53              | <b>503.27</b>          | <b>E</b> | <b>390.20</b>  | 195.60                | 373.17    | 187.09                 | <b>372.19</b>        | 186.60                 | <b>3</b>  |
| <b>9</b>  | 1137.58       | <b>569.29</b>         | 1120.56   | 560.78                 | 1119.57              | 560.29                 | <b>N</b> | <b>261.16</b>  | 131.08                | 244.13    | 122.57                 |                      |                        | <b>2</b>  |
| <b>10</b> |               |                       |           |                        |                      |                        | <b>K</b> | 147.11         | 74.06                 | 130.09    | 65.55                  |                      |                        | <b>1</b>  |



MS/MS Fragmentation of ID211 **GSFGYLDPEYFR**

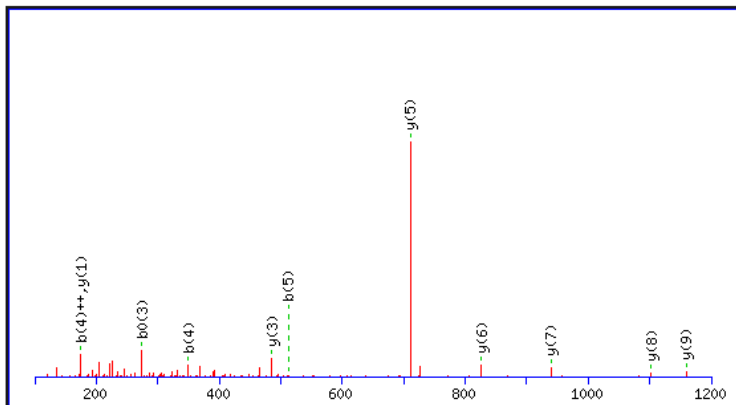

| #         | b             | b <sup>++</sup> | b <sup>0</sup> | b <sup>0++</sup> | Seq.     | y              | y <sup>++</sup> | y <sup>*</sup> | y <sup>*++</sup> | y <sup>0</sup> | y <sup>0++</sup> | #         |
|-----------|---------------|-----------------|----------------|------------------|----------|----------------|-----------------|----------------|------------------|----------------|------------------|-----------|
| <b>1</b>  | 58.03         | 29.52           |                |                  | <b>G</b> |                |                 |                |                  |                |                  | <b>12</b> |
| <b>2</b>  | 145.06        | 73.03           | 127.05         | 64.03            | <b>S</b> | 1393.64        | 697.32          | 1376.62        | 688.81           | 1375.63        | 688.32           | <b>11</b> |
| <b>3</b>  | 292.13        | 146.57          | <b>274.12</b>  | 137.56           | <b>F</b> | 1306.61        | 653.81          | 1289.58        | 645.30           | 1288.60        | 644.80           | <b>10</b> |
| <b>4</b>  | <b>349.15</b> | <b>175.08</b>   | 331.14         | 166.07           | <b>G</b> | <b>1159.54</b> | 580.27          | 1142.52        | 571.76           | 1141.53        | 571.27           | <b>9</b>  |
| <b>5</b>  | <b>512.21</b> | 256.61          | 494.20         | 247.61           | <b>Y</b> | <b>1102.52</b> | 551.76          | 1085.49        | 543.25           | 1084.51        | 542.76           | <b>8</b>  |
| <b>6</b>  | 625.30        | 313.15          | 607.29         | 304.15           | <b>L</b> | <b>939.46</b>  | 470.23          | 922.43         | 461.72           | 921.45         | 461.23           | <b>7</b>  |
| <b>7</b>  | 740.32        | 370.67          | 722.31         | 361.66           | <b>D</b> | <b>826.37</b>  | 413.69          | 809.35         | 405.18           | 808.36         | 404.68           | <b>6</b>  |
| <b>8</b>  | 837.38        | 419.19          | 819.37         | 410.19           | <b>P</b> | <b>711.35</b>  | 356.18          | 694.32         | 347.66           | 693.34         | 347.17           | <b>5</b>  |
| <b>9</b>  | 966.42        | 483.71          | 948.41         | 474.71           | <b>E</b> | 614.29         | 307.65          | 597.27         | 299.14           | 596.28         | 298.64           | <b>4</b>  |
| <b>10</b> | 1129.48       | 565.25          | 1111.47        | 556.24           | <b>Y</b> | <b>485.25</b>  | 243.13          | 468.22         | 234.62           |                |                  | <b>3</b>  |
| <b>11</b> | 1276.55       | 638.78          | 1258.54        | 629.77           | <b>F</b> | 322.19         | 161.60          | 305.16         | 153.08           |                |                  | <b>2</b>  |
| <b>12</b> |               |                 |                |                  | <b>R</b> | <b>175.12</b>  | 88.06           | 158.09         | 79.55            |                |                  | <b>1</b>  |

MS/MS Fragmentation of ID216 **ILIYEYMPNK**

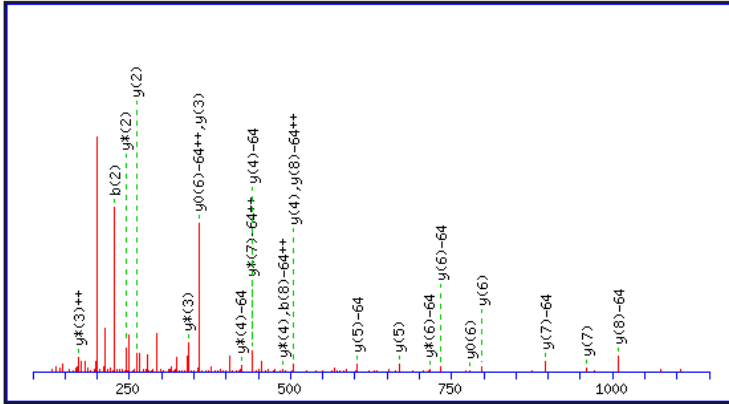

| #         | b             | b <sup>++</sup> | b*      | b <sup>*++</sup> | b <sup>0</sup> | b <sup>0++</sup> | Seq.     | y              | y <sup>++</sup> | y*            | y <sup>*++</sup> | y <sup>0</sup> | y <sup>0++</sup> | #         |
|-----------|---------------|-----------------|---------|------------------|----------------|------------------|----------|----------------|-----------------|---------------|------------------|----------------|------------------|-----------|
| <b>1</b>  | 114.09        | 57.55           |         |                  |                |                  | <b>I</b> |                |                 |               |                  |                |                  | <b>10</b> |
| <b>2</b>  | <b>227.18</b> | 114.09          |         |                  |                |                  | <b>L</b> | 1122.58        | 561.80          | 1105.56       | 553.28           | 1104.57        | 552.79           | <b>9</b>  |
| <b>3</b>  | 340.26        | 170.63          |         |                  |                |                  | <b>I</b> | <b>1009.50</b> | <b>505.25</b>   | 992.47        | 496.74           | 991.49         | 496.25           | <b>8</b>  |
| <b>4</b>  | 503.32        | 252.17          |         |                  |                |                  | <b>Y</b> | <b>896.41</b>  | 448.71          | 879.39        | <b>440.20</b>    | 878.40         | 439.71           | <b>7</b>  |
| <b>5</b>  | 632.37        | 316.69          |         |                  | 614.35         | 307.68           | <b>E</b> | <b>733.35</b>  | 367.18          | <b>716.33</b> | 358.67           | 715.34         | <b>358.17</b>    | <b>6</b>  |
| <b>6</b>  | 795.43        | 398.22          |         |                  | 777.42         | 389.21           | <b>Y</b> | <b>604.31</b>  | 302.66          | 587.28        | 294.14           |                |                  | <b>5</b>  |
| <b>7</b>  | 878.47        | 439.74          |         |                  | 860.46         | 430.73           | <b>M</b> | <b>441.25</b>  | 221.13          | <b>424.22</b> | 212.61           |                |                  | <b>4</b>  |
| <b>8</b>  | 975.52        | <b>488.26</b>   |         |                  | 957.51         | 479.26           | <b>P</b> | <b>358.21</b>  | 179.61          | <b>341.18</b> | <b>171.09</b>    |                |                  | <b>3</b>  |
| <b>9</b>  | 1089.56       | 545.28          | 1072.54 | 536.77           | 1071.55        | 536.28           | <b>N</b> | <b>261.16</b>  | 131.08          | <b>244.13</b> | 122.57           |                |                  | <b>2</b>  |
| <b>10</b> |               |                 |         |                  |                |                  | <b>K</b> | 147.11         | 74.06           | 130.09        | 65.55            |                |                  | <b>1</b>  |

MS/MS Fragmentation of ID219 **EFKAEVEIISR**

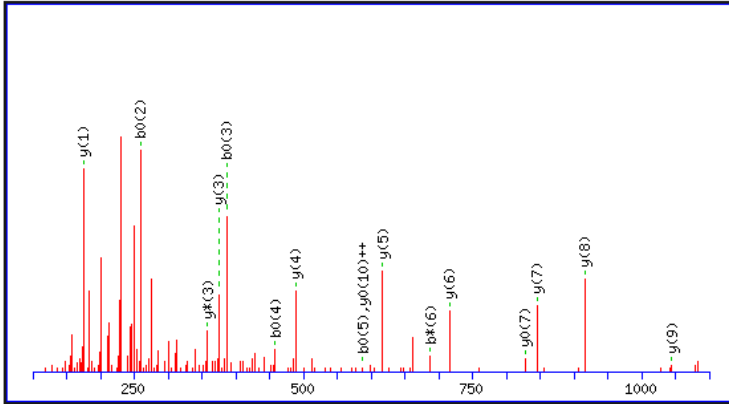

| #         | <b>b</b> | <b>b<sup>++</sup></b> | <b>b*</b>     | <b>b<sup>*++</sup></b> | <b>b<sup>0</sup></b> | <b>b<sup>0++</sup></b> | Seq.     | <b>y</b>       | <b>y<sup>++</sup></b> | <b>y*</b>     | <b>y<sup>*++</sup></b> | <b>y<sup>0</sup></b> | <b>y<sup>0++</sup></b> | #         |
|-----------|----------|-----------------------|---------------|------------------------|----------------------|------------------------|----------|----------------|-----------------------|---------------|------------------------|----------------------|------------------------|-----------|
| <b>1</b>  | 130.05   | 65.53                 |               |                        | 112.04               | 56.52                  | <b>E</b> |                |                       |               |                        |                      |                        | <b>11</b> |
| <b>2</b>  | 277.12   | 139.06                |               |                        | <b>259.11</b>        | 130.06                 | <b>F</b> | 1191.67        | 596.34                | 1174.65       | 587.83                 | 1173.66              | <b>587.33</b>          | <b>10</b> |
| <b>3</b>  | 405.21   | 203.11                | 388.19        | 194.60                 | <b>387.20</b>        | 194.10                 | <b>K</b> | <b>1044.60</b> | 522.81                | 1027.58       | 514.29                 | 1026.59              | 513.80                 | <b>9</b>  |
| <b>4</b>  | 476.25   | 238.63                | 459.22        | 230.12                 | <b>458.24</b>        | 229.62                 | <b>A</b> | <b>916.51</b>  | 458.76                | 899.48        | 450.25                 | 898.50               | 449.75                 | <b>8</b>  |
| <b>5</b>  | 605.29   | 303.15                | 588.27        | 294.64                 | <b>587.28</b>        | 294.14                 | <b>E</b> | <b>845.47</b>  | 423.24                | 828.45        | 414.73                 | <b>827.46</b>        | 414.23                 | <b>7</b>  |
| <b>6</b>  | 704.36   | 352.68                | <b>687.33</b> | 344.17                 | 686.35               | 343.68                 | <b>V</b> | <b>716.43</b>  | 358.72                | 699.40        | 350.21                 | 698.42               | 349.71                 | <b>6</b>  |
| <b>7</b>  | 833.40   | 417.21                | 816.38        | 408.69                 | 815.39               | 408.20                 | <b>E</b> | <b>617.36</b>  | 309.18                | 600.34        | 300.67                 | 599.35               | 300.18                 | <b>5</b>  |
| <b>8</b>  | 946.49   | 473.75                | 929.46        | 465.23                 | 928.48               | 464.74                 | <b>I</b> | <b>488.32</b>  | 244.66                | 471.29        | 236.15                 | 470.31               | 235.66                 | <b>4</b>  |
| <b>9</b>  | 1059.57  | 530.29                | 1042.55       | 521.78                 | 1041.56              | 521.28                 | <b>I</b> | <b>375.24</b>  | 188.12                | <b>358.21</b> | 179.61                 | 357.22               | 179.12                 | <b>3</b>  |
| <b>10</b> | 1146.60  | 573.81                | 1129.58       | 565.29                 | 1128.59              | 564.80                 | <b>S</b> | 262.15         | 131.58                | 245.12        | 123.07                 | 244.14               | 122.57                 | <b>2</b>  |
| <b>11</b> |          |                       |               |                        |                      |                        | <b>R</b> | <b>175.12</b>  | 88.06                 | 158.09        | 79.55                  |                      |                        | <b>1</b>  |

MS/MS Fragmentation of ID222 **IGPLYFVVK**

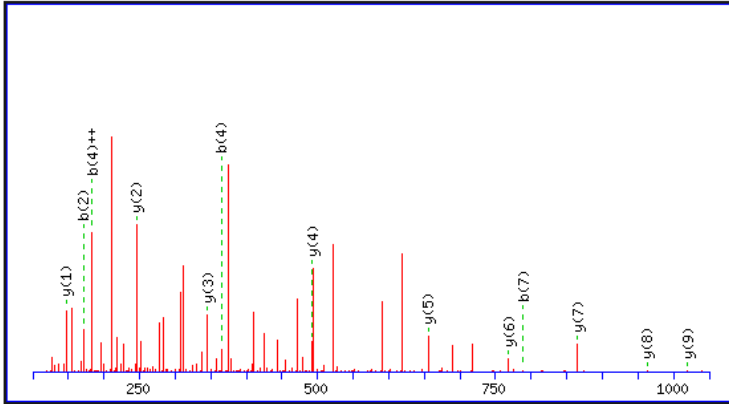

| #         | b             | b <sup>++</sup> | Seq.     | y              | y <sup>++</sup> | y*      | y <sup>*++</sup> | #         |
|-----------|---------------|-----------------|----------|----------------|-----------------|---------|------------------|-----------|
| <b>1</b>  | 114.09        | 57.55           | <b>I</b> |                |                 |         |                  | <b>10</b> |
| <b>2</b>  | <b>171.11</b> | 86.06           | <b>G</b> | <b>1019.59</b> | 510.30          | 1002.57 | 501.79           | <b>9</b>  |
| <b>3</b>  | 268.17        | 134.59          | <b>P</b> | <b>962.57</b>  | 481.79          | 945.54  | 473.28           | <b>8</b>  |
| <b>4</b>  | <b>365.22</b> | <b>183.11</b>   | <b>P</b> | <b>865.52</b>  | 433.26          | 848.49  | 424.75           | <b>7</b>  |
| <b>5</b>  | 478.30        | 239.65          | <b>L</b> | <b>768.47</b>  | 384.74          | 751.44  | 376.22           | <b>6</b>  |
| <b>6</b>  | 641.37        | 321.19          | <b>Y</b> | <b>655.38</b>  | 328.19          | 638.35  | 319.68           | <b>5</b>  |
| <b>7</b>  | <b>788.43</b> | 394.72          | <b>F</b> | <b>492.32</b>  | 246.66          | 475.29  | 238.15           | <b>4</b>  |
| <b>8</b>  | 887.50        | 444.25          | <b>V</b> | <b>345.25</b>  | 173.13          | 328.22  | 164.62           | <b>3</b>  |
| <b>9</b>  | 986.57        | 493.79          | <b>V</b> | <b>246.18</b>  | 123.59          | 229.15  | 115.08           | <b>2</b>  |
| <b>10</b> |               |                 | <b>K</b> | <b>147.11</b>  | 74.06           | 130.09  | 65.55            | <b>1</b>  |

MS/MS Fragmentation of ID233 **SMLISQLSFEK**

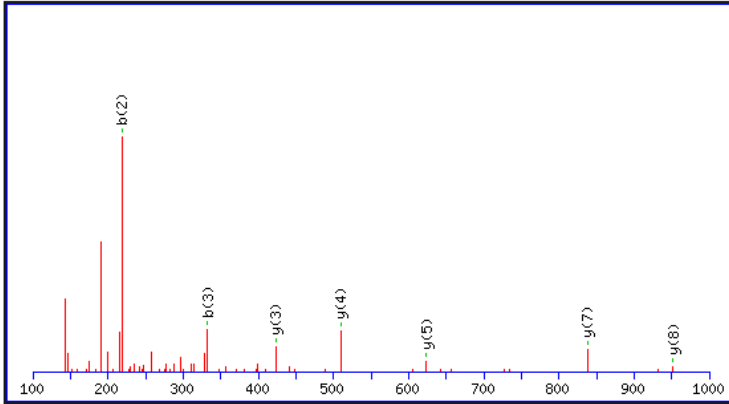

| #         | <b>b</b>      | <b>b<sup>++</sup></b> | <b>b*</b> | <b>b<sup>*++</sup></b> | <b>b<sup>0</sup></b> | <b>b<sup>0++</sup></b> | Seq.     | <b>y</b>      | <b>y<sup>++</sup></b> | <b>y*</b> | <b>y<sup>*++</sup></b> | <b>y<sup>0</sup></b> | <b>y<sup>0++</sup></b> | #         |
|-----------|---------------|-----------------------|-----------|------------------------|----------------------|------------------------|----------|---------------|-----------------------|-----------|------------------------|----------------------|------------------------|-----------|
| <b>1</b>  | 88.04         | 44.52                 |           |                        | 70.03                | 35.52                  | <b>S</b> |               |                       |           |                        |                      |                        | <b>11</b> |
| <b>2</b>  | <b>219.08</b> | 110.04                |           |                        | 201.07               | 101.04                 | <b>M</b> | 1195.64       | 598.32                | 1178.61   | 589.81                 | 1177.63              | 589.32                 | <b>10</b> |
| <b>3</b>  | <b>332.16</b> | 166.59                |           |                        | 314.15               | 157.58                 | <b>L</b> | 1064.60       | 532.80                | 1047.57   | 524.29                 | 1046.59              | 523.80                 | <b>9</b>  |
| <b>4</b>  | 445.25        | 223.13                |           |                        | 427.24               | 214.12                 | <b>I</b> | <b>951.51</b> | 476.26                | 934.49    | 467.75                 | 933.50               | 467.26                 | <b>8</b>  |
| <b>5</b>  | 532.28        | 266.64                |           |                        | 514.27               | 257.64                 | <b>S</b> | <b>838.43</b> | 419.72                | 821.40    | 411.21                 | 820.42               | 410.71                 | <b>7</b>  |
| <b>6</b>  | 660.34        | 330.67                | 643.31    | 322.16                 | 642.33               | 321.67                 | <b>Q</b> | 751.40        | 376.20                | 734.37    | 367.69                 | 733.39               | 367.20                 | <b>6</b>  |
| <b>7</b>  | 773.42        | 387.21                | 756.40    | 378.70                 | 755.41               | 378.21                 | <b>L</b> | <b>623.34</b> | 312.17                | 606.31    | 303.66                 | 605.33               | 303.17                 | <b>5</b>  |
| <b>8</b>  | 860.45        | 430.73                | 843.43    | 422.22                 | 842.44               | 421.73                 | <b>S</b> | <b>510.26</b> | 255.63                | 493.23    | 247.12                 | 492.25               | 246.63                 | <b>4</b>  |
| <b>9</b>  | 1007.52       | 504.27                | 990.50    | 495.75                 | 989.51               | 495.26                 | <b>F</b> | <b>423.22</b> | 212.12                | 406.20    | 203.60                 | 405.21               | 203.11                 | <b>3</b>  |
| <b>10</b> | 1136.57       | 568.79                | 1119.54   | 560.27                 | 1118.56              | 559.78                 | <b>E</b> | 276.16        | 138.58                | 259.13    | 130.07                 | 258.14               | 129.58                 | <b>2</b>  |
| <b>11</b> |               |                       |           |                        |                      |                        | <b>K</b> | 147.11        | 74.06                 | 130.09    | 65.55                  |                      |                        | <b>1</b>  |

MS/MS Fragmentation of ID245 **SGNEQFVTELSK**

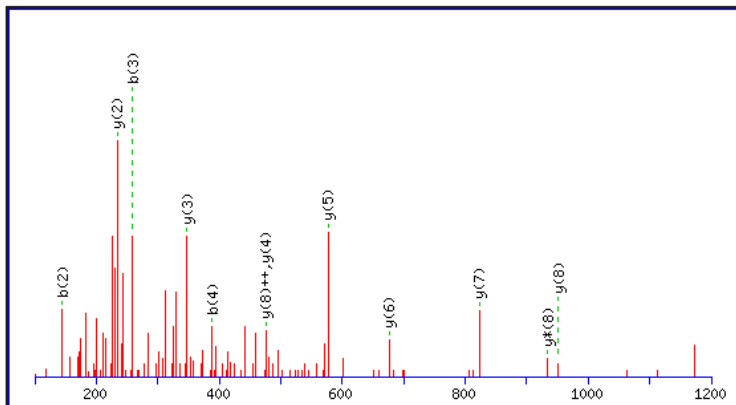

| #         | <b>b</b>      | <b>b<sup>++</sup></b> | <b>b*</b> | <b>b<sup>*++</sup></b> | <b>b<sup>0</sup></b> | <b>b<sup>0++</sup></b> | Seq.     | <b>y</b>      | <b>y<sup>++</sup></b> | <b>y*</b>     | <b>y<sup>*++</sup></b> | <b>y<sup>0</sup></b> | <b>y<sup>0++</sup></b> | #         |
|-----------|---------------|-----------------------|-----------|------------------------|----------------------|------------------------|----------|---------------|-----------------------|---------------|------------------------|----------------------|------------------------|-----------|
| <b>1</b>  | 88.04         | 44.52                 |           |                        | 70.03                | 35.52                  | <b>S</b> |               |                       |               |                        |                      |                        | <b>12</b> |
| <b>2</b>  | <b>145.06</b> | 73.03                 |           |                        | 127.05               | 64.03                  | <b>G</b> | 1251.62       | 626.31                | 1234.59       | 617.80                 | 1233.61              | 617.31                 | <b>11</b> |
| <b>3</b>  | <b>259.10</b> | 130.06                | 242.08    | 121.54                 | 241.09               | 121.05                 | <b>N</b> | 1194.60       | 597.80                | 1177.57       | 589.29                 | 1176.59              | 588.80                 | <b>10</b> |
| <b>4</b>  | <b>388.15</b> | 194.58                | 371.12    | 186.06                 | 370.14               | 185.57                 | <b>E</b> | 1080.56       | 540.78                | 1063.53       | 532.27                 | 1062.55              | 531.78                 | <b>9</b>  |
| <b>5</b>  | 516.20        | 258.61                | 499.18    | 250.09                 | 498.19               | 249.60                 | <b>Q</b> | <b>951.51</b> | <b>476.26</b>         | <b>934.49</b> | 467.75                 | 933.50               | 467.26                 | <b>8</b>  |
| <b>6</b>  | 663.27        | 332.14                | 646.25    | 323.63                 | 645.26               | 323.13                 | <b>F</b> | <b>823.46</b> | 412.23                | 806.43        | 403.72                 | 805.45               | 403.23                 | <b>7</b>  |
| <b>7</b>  | 762.34        | 381.67                | 745.32    | 373.16                 | 744.33               | 372.67                 | <b>V</b> | <b>676.39</b> | 338.70                | 659.36        | 330.18                 | 658.38               | 329.69                 | <b>6</b>  |
| <b>8</b>  | 863.39        | 432.20                | 846.36    | 423.69                 | 845.38               | 423.19                 | <b>T</b> | <b>577.32</b> | 289.16                | 560.29        | 280.65                 | 559.31               | 280.16                 | <b>5</b>  |
| <b>9</b>  | 992.43        | 496.72                | 975.41    | 488.21                 | 974.42               | 487.71                 | <b>E</b> | <b>476.27</b> | 238.64                | 459.24        | 230.13                 | 458.26               | 229.63                 | <b>4</b>  |
| <b>10</b> | 1105.52       | 553.26                | 1088.49   | 544.75                 | 1087.51              | 544.26                 | <b>L</b> | <b>347.23</b> | 174.12                | 330.20        | 165.60                 | 329.22               | 165.11                 | <b>3</b>  |
| <b>11</b> | 1192.55       | 596.78                | 1175.52   | 588.26                 | 1174.54              | 587.77                 | <b>S</b> | <b>234.14</b> | 117.58                | 217.12        | 109.06                 | 216.13               | 108.57                 | <b>2</b>  |
| <b>12</b> |               |                       |           |                        |                      |                        | <b>K</b> | 147.11        | 74.06                 | 130.09        | 65.55                  |                      |                        | <b>1</b>  |

MS/MS Fragmentation of ID247 **SAALELFTPR**

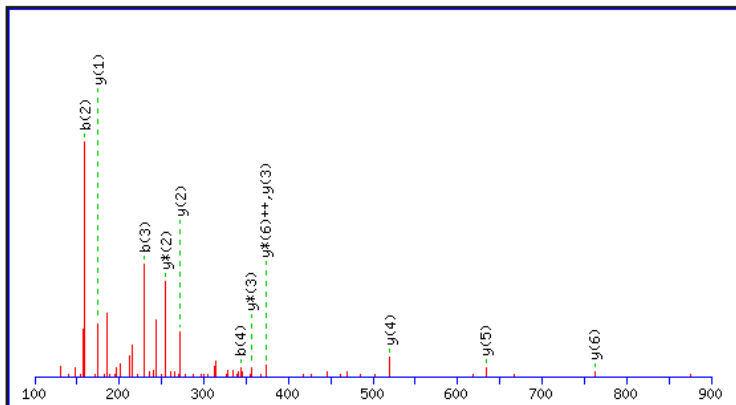

| #         | <b>b</b>      | <b>b<sup>++</sup></b> | <b>b<sup>0</sup></b> | <b>b<sup>0++</sup></b> | Seq.     | <b>y</b>      | <b>y<sup>++</sup></b> | <b>y<sup>*</sup></b> | <b>y<sup>+++</sup></b> | <b>y<sup>0</sup></b> | <b>y<sup>0++</sup></b> | #         |
|-----------|---------------|-----------------------|----------------------|------------------------|----------|---------------|-----------------------|----------------------|------------------------|----------------------|------------------------|-----------|
| <b>1</b>  | 88.04         | 44.52                 | 70.03                | 35.52                  | <b>S</b> |               |                       |                      |                        |                      |                        | <b>10</b> |
| <b>2</b>  | <b>159.08</b> | 80.04                 | 141.07               | 71.04                  | <b>A</b> | 1017.57       | 509.29                | 1000.55              | 500.78                 | 999.56               | 500.28                 | <b>9</b>  |
| <b>3</b>  | <b>230.11</b> | 115.56                | 212.10               | 106.56                 | <b>A</b> | 946.54        | 473.77                | 929.51               | 465.26                 | 928.53               | 464.77                 | <b>8</b>  |
| <b>4</b>  | <b>343.20</b> | 172.10                | 325.19               | 163.10                 | <b>L</b> | 875.50        | 438.25                | 858.47               | 429.74                 | 857.49               | 429.25                 | <b>7</b>  |
| <b>5</b>  | 472.24        | 236.62                | 454.23               | 227.62                 | <b>E</b> | <b>762.41</b> | 381.71                | 745.39               | <b>373.20</b>          | 744.40               | 372.71                 | <b>6</b>  |
| <b>6</b>  | 585.32        | 293.17                | 567.31               | 284.16                 | <b>L</b> | <b>633.37</b> | 317.19                | 616.35               | 308.68                 | 615.36               | 308.18                 | <b>5</b>  |
| <b>7</b>  | 732.39        | 366.70                | 714.38               | 357.69                 | <b>F</b> | <b>520.29</b> | 260.65                | 503.26               | 252.13                 | 502.28               | 251.64                 | <b>4</b>  |
| <b>8</b>  | 833.44        | 417.22                | 815.43               | 408.22                 | <b>T</b> | <b>373.22</b> | 187.11                | <b>356.19</b>        | 178.60                 | 355.21               | 178.11                 | <b>3</b>  |
| <b>9</b>  | 930.49        | 465.75                | 912.48               | 456.74                 | <b>P</b> | <b>272.17</b> | 136.59                | <b>255.15</b>        | 128.08                 |                      |                        | <b>2</b>  |
| <b>10</b> |               |                       |                      |                        | <b>R</b> | <b>175.12</b> | 88.06                 | 158.09               | 79.55                  |                      |                        | <b>1</b>  |

MS/MS Fragmentation of ID248 **EIAIGLEKSGQR**

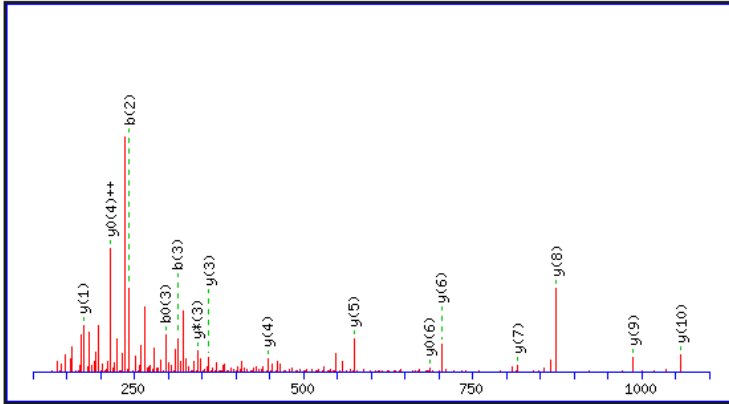

| #  | b             | b <sup>++</sup> | b <sup>*</sup> | b <sup>*++</sup> | b <sup>0</sup> | b <sup>0++</sup> | Seq. | y              | y <sup>++</sup> | y <sup>*</sup> | y <sup>*++</sup> | y <sup>0</sup> | y <sup>0++</sup> | #  |
|----|---------------|-----------------|----------------|------------------|----------------|------------------|------|----------------|-----------------|----------------|------------------|----------------|------------------|----|
| 1  | 130.05        | 65.53           |                |                  | 112.04         | 56.52            | E    |                |                 |                |                  |                |                  | 12 |
| 2  | <b>243.13</b> | 122.07          |                |                  | 225.12         | 113.07           | I    | 1171.68        | 586.34          | 1154.65        | 577.83           | 1153.67        | 577.34           | 11 |
| 3  | <b>314.17</b> | 157.59          |                |                  | <b>296.16</b>  | 148.58           | A    | <b>1058.60</b> | 529.80          | 1041.57        | 521.29           | 1040.58        | 520.80           | 10 |
| 4  | 427.26        | 214.13          |                |                  | 409.24         | 205.13           | I    | <b>987.56</b>  | 494.28          | 970.53         | 485.77           | 969.55         | 485.28           | 9  |
| 5  | 484.28        | 242.64          |                |                  | 466.27         | 233.64           | G    | <b>874.47</b>  | 437.74          | 857.45         | 429.23           | 856.46         | 428.74           | 8  |
| 6  | 597.36        | 299.18          |                |                  | 579.35         | 290.18           | L    | <b>817.45</b>  | 409.23          | 800.43         | 400.72           | 799.44         | 400.22           | 7  |
| 7  | 726.40        | 363.71          |                |                  | 708.39         | 354.70           | E    | <b>704.37</b>  | 352.69          | 687.34         | 344.17           | <b>686.36</b>  | 343.68           | 6  |
| 8  | 854.50        | 427.75          | 837.47         | 419.24           | 836.49         | 418.75           | K    | <b>575.33</b>  | 288.17          | 558.30         | 279.65           | 557.32         | 279.16           | 5  |
| 9  | 941.53        | 471.27          | 924.50         | 462.76           | 923.52         | 462.26           | S    | <b>447.23</b>  | 224.12          | 430.20         | 215.61           | 429.22         | <b>215.11</b>    | 4  |
| 10 | 998.55        | 499.78          | 981.53         | 491.27           | 980.54         | 490.77           | G    | <b>360.20</b>  | 180.60          | <b>343.17</b>  | 172.09           |                |                  | 3  |
| 11 | 1126.61       | 563.81          | 1109.58        | 555.30           | 1108.60        | 554.80           | Q    | 303.18         | 152.09          | 286.15         | 143.58           |                |                  | 2  |
| 12 |               |                 |                |                  |                |                  | R    | <b>175.12</b>  | 88.06           | 158.09         | 79.55            |                |                  | 1  |



MS/MS Fragmentation of ID253 **GVYPDGLYR**

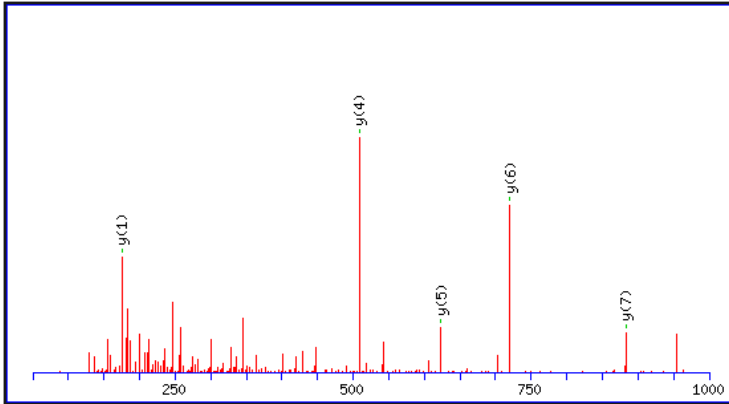

| #        | <b>b</b> | <b>b<sup>++</sup></b> | <b>b<sup>0</sup></b> | <b>b<sup>0++</sup></b> | <b>Seq.</b> | <b>y</b>      | <b>y<sup>++</sup></b> | <b>y<sup>*</sup></b> | <b>y<sup>+++</sup></b> | <b>y<sup>0</sup></b> | <b>y<sup>0++</sup></b> | #        |
|----------|----------|-----------------------|----------------------|------------------------|-------------|---------------|-----------------------|----------------------|------------------------|----------------------|------------------------|----------|
| <b>1</b> | 100.04   | 50.52                 |                      |                        | <b>G</b>    |               |                       |                      |                        |                      |                        | <b>9</b> |
| <b>2</b> | 199.11   | 100.06                |                      |                        | <b>V</b>    | 982.50        | 491.75                | 965.47               | 483.24                 | 964.49               | 482.75                 | <b>8</b> |
| <b>3</b> | 362.17   | 181.59                |                      |                        | <b>Y</b>    | <b>883.43</b> | 442.22                | 866.40               | 433.71                 | 865.42               | 433.21                 | <b>7</b> |
| <b>4</b> | 459.22   | 230.12                |                      |                        | <b>P</b>    | <b>720.37</b> | 360.69                | 703.34               | 352.17                 | 702.36               | 351.68                 | <b>6</b> |
| <b>5</b> | 574.25   | 287.63                | 556.24               | 278.62                 | <b>D</b>    | <b>623.31</b> | 312.16                | 606.29               | 303.65                 | 605.30               | 303.16                 | <b>5</b> |
| <b>6</b> | 631.27   | 316.14                | 613.26               | 307.13                 | <b>G</b>    | <b>508.29</b> | 254.65                | 491.26               | 246.13                 |                      |                        | <b>4</b> |
| <b>7</b> | 744.36   | 372.68                | 726.35               | 363.68                 | <b>L</b>    | 451.27        | 226.14                | 434.24               | 217.62                 |                      |                        | <b>3</b> |
| <b>8</b> | 907.42   | 454.21                | 889.41               | 445.21                 | <b>Y</b>    | 338.18        | 169.59                | 321.16               | 161.08                 |                      |                        | <b>2</b> |
| <b>9</b> |          |                       |                      |                        | <b>R</b>    | <b>175.12</b> | 88.06                 | 158.09               | 79.55                  |                      |                        | <b>1</b> |

MS/MS Fragmentation of ID254 **SDSTYSSTLLR**

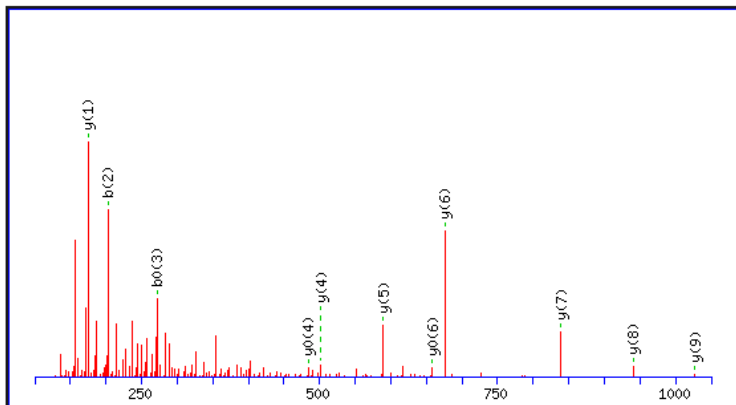

| #         | <b>b</b>      | <b>b<sup>++</sup></b> | <b>b<sup>0</sup></b> | <b>b<sup>0++</sup></b> | Seq.     | <b>y</b>       | <b>y<sup>++</sup></b> | <b>y<sup>*</sup></b> | <b>y<sup>*++</sup></b> | <b>y<sup>0</sup></b> | <b>y<sup>0++</sup></b> | #         |
|-----------|---------------|-----------------------|----------------------|------------------------|----------|----------------|-----------------------|----------------------|------------------------|----------------------|------------------------|-----------|
| <b>1</b>  | 88.04         | 44.52                 | 70.03                | 35.52                  | <b>S</b> |                |                       |                      |                        |                      |                        | <b>11</b> |
| <b>2</b>  | <b>203.07</b> | 102.04                | 185.06               | 93.03                  | <b>D</b> | 1142.57        | 571.79                | 1125.54              | 563.27                 | 1124.56              | 562.78                 | <b>10</b> |
| <b>3</b>  | 290.10        | 145.55                | <b>272.09</b>        | 136.55                 | <b>S</b> | <b>1027.54</b> | 514.27                | 1010.52              | 505.76                 | 1009.53              | 505.27                 | <b>9</b>  |
| <b>4</b>  | 391.15        | 196.08                | 373.14               | 187.07                 | <b>T</b> | <b>940.51</b>  | 470.76                | 923.48               | 462.25                 | 922.50               | 461.75                 | <b>8</b>  |
| <b>5</b>  | 554.21        | 277.61                | 536.20               | 268.60                 | <b>Y</b> | <b>839.46</b>  | 420.23                | 822.44               | 411.72                 | 821.45               | 411.23                 | <b>7</b>  |
| <b>6</b>  | 641.24        | 321.12                | 623.23               | 312.12                 | <b>S</b> | <b>676.40</b>  | 338.70                | 659.37               | 330.19                 | <b>658.39</b>        | 329.70                 | <b>6</b>  |
| <b>7</b>  | 728.27        | 364.64                | 710.26               | 355.64                 | <b>S</b> | <b>589.37</b>  | 295.19                | 572.34               | 286.67                 | 571.36               | 286.18                 | <b>5</b>  |
| <b>8</b>  | 829.32        | 415.16                | 811.31               | 406.16                 | <b>T</b> | <b>502.33</b>  | 251.67                | 485.31               | 243.16                 | <b>484.32</b>        | 242.67                 | <b>4</b>  |
| <b>9</b>  | 942.41        | 471.71                | 924.39               | 462.70                 | <b>L</b> | 401.29         | 201.15                | 384.26               | 192.63                 |                      |                        | <b>3</b>  |
| <b>10</b> | 1055.49       | 528.25                | 1037.48              | 519.24                 | <b>L</b> | 288.20         | 144.61                | 271.18               | 136.09                 |                      |                        | <b>2</b>  |
| <b>11</b> |               |                       |                      |                        | <b>R</b> | <b>175.12</b>  | 88.06                 | 158.09               | 79.55                  |                      |                        | <b>1</b>  |

MS/MS Fragmentation of ID255 **DLVGGYYDAGDAIK**

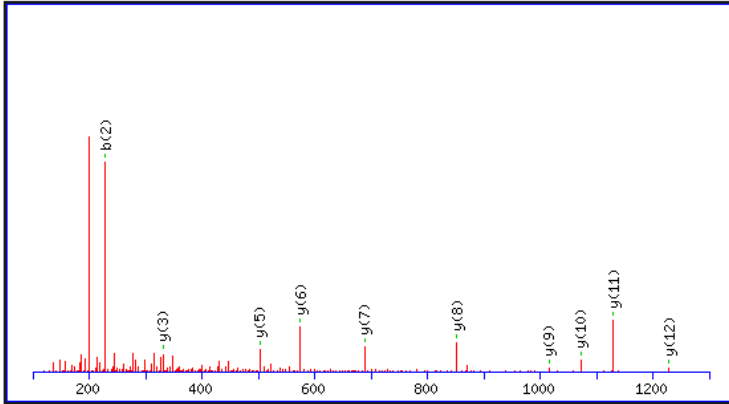

| #         | <b>b</b>      | <b>b<sup>++</sup></b> | <b>b<sup>0</sup></b> | <b>b<sup>0++</sup></b> | Seq.     | <b>y</b>       | <b>y<sup>++</sup></b> | <b>y<sup>*</sup></b> | <b>y<sup>*++</sup></b> | <b>y<sup>0</sup></b> | <b>y<sup>0++</sup></b> | #         |
|-----------|---------------|-----------------------|----------------------|------------------------|----------|----------------|-----------------------|----------------------|------------------------|----------------------|------------------------|-----------|
| <b>1</b>  | 116.03        | 58.52                 | 98.02                | 49.52                  | <b>D</b> |                |                       |                      |                        |                      |                        | <b>14</b> |
| <b>2</b>  | <b>229.12</b> | 115.06                | 211.11               | 106.06                 | <b>L</b> | 1341.67        | 671.34                | 1324.64              | 662.82                 | 1323.66              | 662.33                 | <b>13</b> |
| <b>3</b>  | 328.19        | 164.60                | 310.18               | 155.59                 | <b>V</b> | <b>1228.58</b> | 614.80                | 1211.56              | 606.28                 | 1210.57              | 605.79                 | <b>12</b> |
| <b>4</b>  | 385.21        | 193.11                | 367.20               | 184.10                 | <b>G</b> | <b>1129.52</b> | 565.26                | 1112.49              | 556.75                 | 1111.51              | 556.26                 | <b>11</b> |
| <b>5</b>  | 442.23        | 221.62                | 424.22               | 212.61                 | <b>G</b> | <b>1072.49</b> | 536.75                | 1055.47              | 528.24                 | 1054.48              | 527.75                 | <b>10</b> |
| <b>6</b>  | 605.29        | 303.15                | 587.28               | 294.14                 | <b>Y</b> | <b>1015.47</b> | 508.24                | 998.45               | 499.73                 | 997.46               | 499.23                 | <b>9</b>  |
| <b>7</b>  | 768.36        | 384.68                | 750.35               | 375.68                 | <b>Y</b> | <b>852.41</b>  | 426.71                | 835.38               | 418.20                 | 834.40               | 417.70                 | <b>8</b>  |
| <b>8</b>  | 883.38        | 442.20                | 865.37               | 433.19                 | <b>D</b> | <b>689.35</b>  | 345.18                | 672.32               | 336.66                 | 671.34               | 336.17                 | <b>7</b>  |
| <b>9</b>  | 954.42        | 477.71                | 936.41               | 468.71                 | <b>A</b> | <b>574.32</b>  | 287.66                | 557.29               | 279.15                 | 556.31               | 278.66                 | <b>6</b>  |
| <b>10</b> | 1011.44       | 506.22                | 993.43               | 497.22                 | <b>G</b> | <b>503.28</b>  | 252.14                | 486.26               | 243.63                 | 485.27               | 243.14                 | <b>5</b>  |
| <b>11</b> | 1126.47       | 563.74                | 1108.46              | 554.73                 | <b>D</b> | 446.26         | 223.63                | 429.23               | 215.12                 | 428.25               | 214.63                 | <b>4</b>  |
| <b>12</b> | 1197.51       | 599.26                | 1179.50              | 590.25                 | <b>A</b> | <b>331.23</b>  | 166.12                | 314.21               | 157.61                 |                      |                        | <b>3</b>  |
| <b>13</b> | 1310.59       | 655.80                | 1292.58              | 646.79                 | <b>I</b> | 260.20         | 130.60                | 243.17               | 122.09                 |                      |                        | <b>2</b>  |
| <b>14</b> |               |                       |                      |                        | <b>K</b> | 147.11         | 74.06                 | 130.09               | 65.55                  |                      |                        | <b>1</b>  |

MS/MS Fragmentation of ID257 **LSPETVVQMLK**

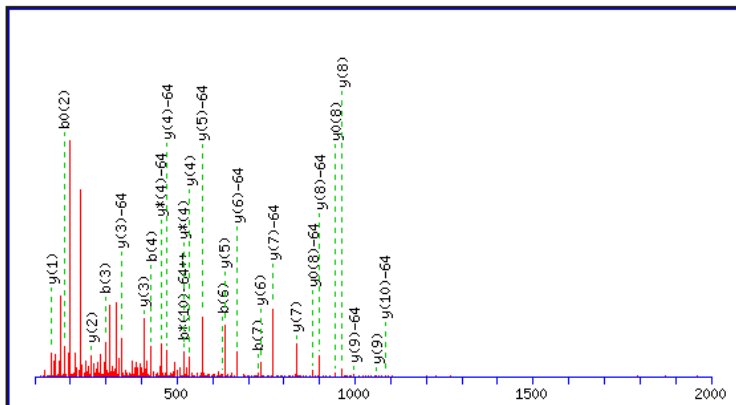

| #  | b       | b <sup>++</sup> | b <sup>*</sup> | b <sup>*++</sup> | b <sup>0</sup> | b <sup>0++</sup> | Seq. | y       | y <sup>++</sup> | y <sup>*</sup> | y <sup>*++</sup> | y <sup>0</sup> | y <sup>0++</sup> | #  |
|----|---------|-----------------|----------------|------------------|----------------|------------------|------|---------|-----------------|----------------|------------------|----------------|------------------|----|
| 1  | 114.09  | 57.55           |                |                  |                |                  | L    |         |                 |                |                  |                |                  | 11 |
| 2  | 201.12  | 101.07          |                |                  | 183.11         | 92.06            | S    | 1083.60 | 542.31          | 1066.58        | 533.79           | 1065.59        | 533.30           | 10 |
| 3  | 298.18  | 149.59          |                |                  | 280.17         | 140.59           | P    | 996.57  | 498.79          | 979.55         | 490.28           | 978.56         | 489.78           | 9  |
| 4  | 427.22  | 214.11          |                |                  | 409.21         | 205.11           | E    | 899.52  | 450.26          | 882.49         | 441.75           | 881.51         | 441.26           | 8  |
| 5  | 528.27  | 264.64          |                |                  | 510.26         | 255.63           | T    | 770.48  | 385.74          | 753.45         | 377.23           | 752.47         | 376.74           | 7  |
| 6  | 627.33  | 314.17          |                |                  | 609.32         | 305.17           | V    | 669.43  | 335.22          | 652.40         | 326.71           |                |                  | 6  |
| 7  | 726.40  | 363.71          |                |                  | 708.39         | 354.70           | V    | 570.36  | 285.68          | 553.33         | 277.17           |                |                  | 5  |
| 8  | 854.46  | 427.73          | 837.44         | 419.22           | 836.45         | 418.73           | Q    | 471.29  | 236.15          | 454.27         | 227.64           |                |                  | 4  |
| 9  | 937.50  | 469.25          | 920.47         | 460.74           | 919.49         | 460.25           | M    | 343.23  | 172.12          | 326.21         | 163.61           |                |                  | 3  |
| 10 | 1050.58 | 525.80          | 1033.56        | 517.28           | 1032.57        | 516.79           | L    | 260.20  | 130.60          | 243.17         | 122.09           |                |                  | 2  |
| 11 |         |                 |                |                  |                |                  | K    | 147.11  | 74.06           | 130.09         | 65.55            |                |                  | 1  |

MS/MS Fragmentation of ID261 **AGQFTLLIR**

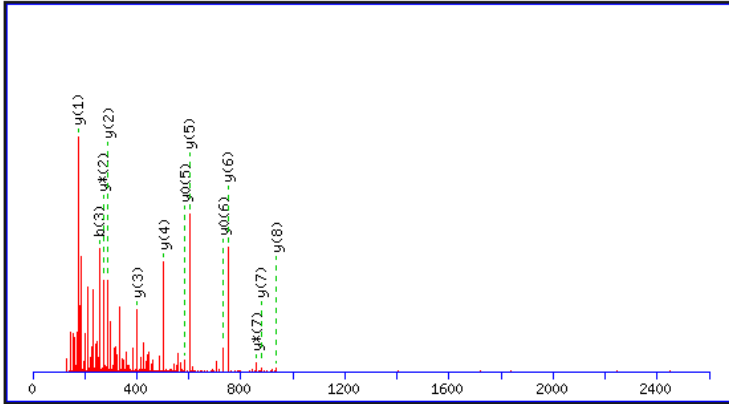

| #        | <b>b</b>      | <b>b<sup>++</sup></b> | <b>b<sup>*</sup></b> | <b>b<sup>*++</sup></b> | <b>b<sup>0</sup></b> | <b>b<sup>0++</sup></b> | Seq.     | <b>y</b>      | <b>y<sup>++</sup></b> | <b>y<sup>*</sup></b> | <b>y<sup>*++</sup></b> | <b>y<sup>0</sup></b> | <b>y<sup>0++</sup></b> | #        |
|----------|---------------|-----------------------|----------------------|------------------------|----------------------|------------------------|----------|---------------|-----------------------|----------------------|------------------------|----------------------|------------------------|----------|
| <b>1</b> | 72.04         | 36.53                 |                      |                        |                      |                        | <b>A</b> |               |                       |                      |                        |                      |                        | <b>9</b> |
| <b>2</b> | 129.07        | 65.04                 |                      |                        |                      |                        | <b>G</b> | <b>935.53</b> | 468.27                | 918.50               | 459.76                 | 917.52               | 459.26                 | <b>8</b> |
| <b>3</b> | <b>257.12</b> | 129.07                | 240.10               | 120.55                 |                      |                        | <b>Q</b> | <b>878.51</b> | 439.76                | <b>861.48</b>        | 431.25                 | 860.50               | 430.75                 | <b>7</b> |
| <b>4</b> | 404.19        | 202.60                | 387.17               | 194.09                 |                      |                        | <b>F</b> | <b>750.45</b> | 375.73                | 733.42               | 367.22                 | <b>732.44</b>        | 366.72                 | <b>6</b> |
| <b>5</b> | 505.24        | 253.12                | 488.21               | 244.61                 | 487.23               | 244.12                 | <b>T</b> | <b>603.38</b> | 302.19                | 586.36               | 293.68                 | <b>585.37</b>        | 293.19                 | <b>5</b> |
| <b>6</b> | 606.29        | 303.65                | 589.26               | 295.13                 | 588.28               | 294.64                 | <b>T</b> | <b>502.33</b> | 251.67                | 485.31               | 243.16                 | 484.32               | 242.67                 | <b>4</b> |
| <b>7</b> | 719.37        | 360.19                | 702.35               | 351.68                 | 701.36               | 351.18                 | <b>L</b> | <b>401.29</b> | 201.15                | 384.26               | 192.63                 |                      |                        | <b>3</b> |
| <b>8</b> | 832.46        | 416.73                | 815.43               | 408.22                 | 814.45               | 407.73                 | <b>I</b> | <b>288.20</b> | 144.61                | <b>271.18</b>        | 136.09                 |                      |                        | <b>2</b> |
| <b>9</b> |               |                       |                      |                        |                      |                        | <b>R</b> | <b>175.12</b> | 88.06                 | 158.09               | 79.55                  |                      |                        | <b>1</b> |

MS/MS Fragmentation of ID266 **ATGLNNHGLVGFQR**

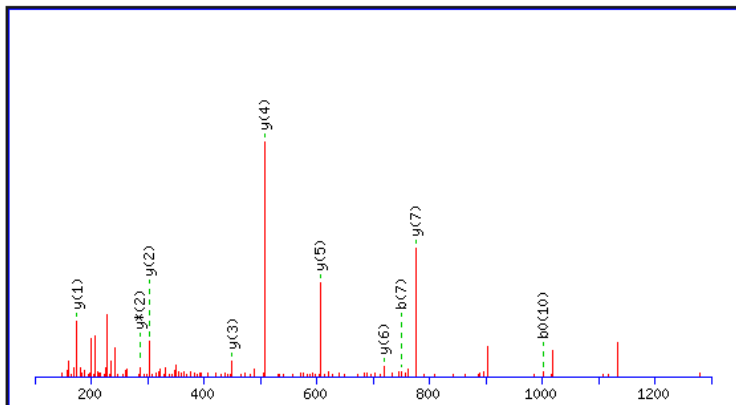

| #  | b             | b <sup>++</sup> | b*      | b <sup>*++</sup> | b <sup>0</sup> | b <sup>0++</sup> | Seq. | y             | y <sup>++</sup> | y*            | y <sup>*++</sup> | y <sup>0</sup> | y <sup>0++</sup> | #  |
|----|---------------|-----------------|---------|------------------|----------------|------------------|------|---------------|-----------------|---------------|------------------|----------------|------------------|----|
| 1  | 114.05        | 57.53           |         |                  |                |                  | A    |               |                 |               |                  |                |                  | 14 |
| 2  | 215.10        | 108.05          |         |                  | 197.09         | 99.05            | T    | 1412.74       | 706.87          | 1395.71       | 698.36           | 1394.73        | 697.87           | 13 |
| 3  | 272.12        | 136.57          |         |                  | 254.11         | 127.56           | G    | 1311.69       | 656.35          | 1294.67       | 647.84           |                |                  | 12 |
| 4  | 385.21        | 193.11          |         |                  | 367.20         | 184.10           | L    | 1254.67       | 627.84          | 1237.64       | 619.33           |                |                  | 11 |
| 5  | 499.25        | 250.13          | 482.22  | 241.62           | 481.24         | 241.12           | N    | 1141.59       | 571.30          | 1124.56       | 562.78           |                |                  | 10 |
| 6  | 613.29        | 307.15          | 596.27  | 298.64           | 595.28         | 298.15           | N    | 1027.54       | 514.28          | 1010.52       | 505.76           |                |                  | 9  |
| 7  | <b>750.35</b> | 375.68          | 733.33  | 367.17           | 732.34         | 366.67           | H    | 913.50        | 457.25          | 896.47        | 448.74           |                |                  | 8  |
| 8  | 807.37        | 404.19          | 790.35  | 395.68           | 789.36         | 395.19           | G    | <b>776.44</b> | 388.72          | 759.41        | 380.21           |                |                  | 7  |
| 9  | 920.46        | 460.73          | 903.43  | 452.22           | 902.45         | 451.73           | L    | <b>719.42</b> | 360.21          | 702.39        | 351.70           |                |                  | 6  |
| 10 | 1019.53       | 510.27          | 1002.50 | 501.75           | <b>1001.52</b> | 501.26           | V    | <b>606.34</b> | 303.67          | 589.31        | 295.16           |                |                  | 5  |
| 11 | 1076.55       | 538.78          | 1059.52 | 530.26           | 1058.54        | 529.77           | G    | <b>507.27</b> | 254.14          | 490.24        | 245.62           |                |                  | 4  |
| 12 | 1223.62       | 612.31          | 1206.59 | 603.80           | 1205.61        | 603.31           | F    | <b>450.25</b> | 225.63          | 433.22        | 217.11           |                |                  | 3  |
| 13 | 1351.68       | 676.34          | 1334.65 | 667.83           | 1333.66        | 667.34           | Q    | <b>303.18</b> | 152.09          | <b>286.15</b> | 143.58           |                |                  | 2  |
| 14 |               |                 |         |                  |                |                  | R    | <b>175.12</b> | 88.06           | 158.09        | 79.55            |                |                  | 1  |

MS/MS Fragmentation of ID277 **QVPIAFLE**R

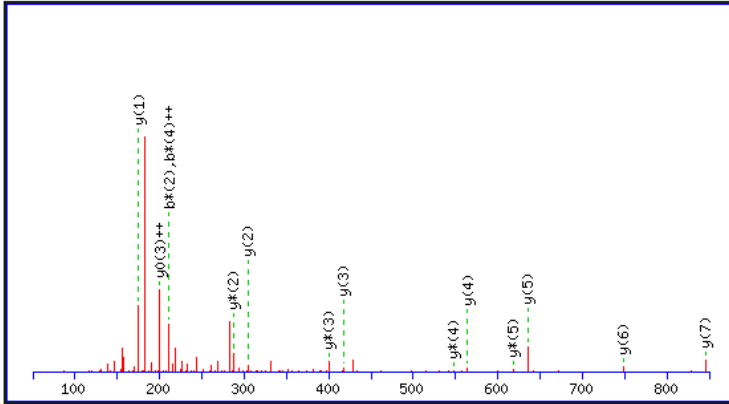

| #        | b      | b <sup>++</sup> | b <sup>*</sup> | b <sup>*++</sup> | b <sup>0</sup> | b <sup>0++</sup> | Seq.     | y             | y <sup>++</sup> | y <sup>*</sup> | y <sup>*++</sup> | y <sup>0</sup> | y <sup>0++</sup> | #        |
|----------|--------|-----------------|----------------|------------------|----------------|------------------|----------|---------------|-----------------|----------------|------------------|----------------|------------------|----------|
| <b>1</b> | 129.07 | 65.04           | 112.04         | 56.52            |                |                  | <b>Q</b> |               |                 |                |                  |                |                  | <b>9</b> |
| <b>2</b> | 228.13 | 114.57          | <b>211.11</b>  | 106.06           |                |                  | <b>V</b> | 944.56        | 472.78          | 927.53         | 464.27           | 926.55         | 463.78           | <b>8</b> |
| <b>3</b> | 325.19 | 163.10          | 308.16         | 154.58           |                |                  | <b>P</b> | <b>845.49</b> | 423.25          | 828.46         | 414.73           | 827.48         | 414.24           | <b>7</b> |
| <b>4</b> | 438.27 | 219.64          | 421.24         | <b>211.13</b>    |                |                  | <b>I</b> | <b>748.44</b> | 374.72          | 731.41         | 366.21           | 730.42         | 365.72           | <b>6</b> |
| <b>5</b> | 509.31 | 255.16          | 492.28         | 246.64           |                |                  | <b>A</b> | <b>635.35</b> | 318.18          | <b>618.32</b>  | 309.67           | 617.34         | 309.17           | <b>5</b> |
| <b>6</b> | 656.38 | 328.69          | 639.35         | 320.18           |                |                  | <b>F</b> | <b>564.31</b> | 282.66          | <b>547.29</b>  | 274.15           | 546.30         | 273.66           | <b>4</b> |
| <b>7</b> | 769.46 | 385.23          | 752.43         | 376.72           |                |                  | <b>L</b> | <b>417.25</b> | 209.13          | <b>400.22</b>  | 200.61           | 399.24         | <b>200.12</b>    | <b>3</b> |
| <b>8</b> | 898.50 | 449.76          | 881.48         | 441.24           | 880.49         | 440.75           | <b>E</b> | <b>304.16</b> | 152.58          | <b>287.13</b>  | 144.07           | 286.15         | 143.58           | <b>2</b> |
| <b>9</b> |        |                 |                |                  |                |                  | <b>R</b> | <b>175.12</b> | 88.06           | 158.09         | 79.55            |                |                  | <b>1</b> |

MS/MS Fragmentation of ID279 **ATNTTSTIFATR**

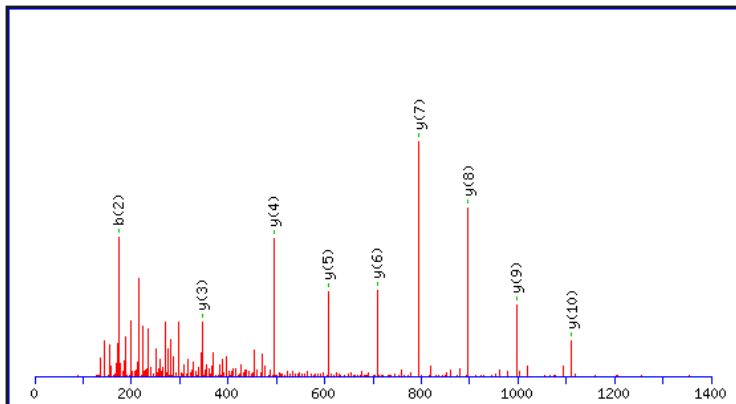

| #         | <b>b</b>      | <b>b<sup>++</sup></b> | <b>b<sup>*</sup></b> | <b>b<sup>*++</sup></b> | <b>b<sup>0</sup></b> | <b>b<sup>0++</sup></b> | Seq.     | <b>y</b>       | <b>y<sup>++</sup></b> | <b>y<sup>*</sup></b> | <b>y<sup>*++</sup></b> | <b>y<sup>0</sup></b> | <b>y<sup>0++</sup></b> | #         |
|-----------|---------------|-----------------------|----------------------|------------------------|----------------------|------------------------|----------|----------------|-----------------------|----------------------|------------------------|----------------------|------------------------|-----------|
| <b>1</b>  | 72.04         | 36.53                 |                      |                        |                      |                        | <b>A</b> |                |                       |                      |                        |                      |                        | <b>12</b> |
| <b>2</b>  | <b>173.09</b> | 87.05                 |                      |                        | 155.08               | 78.04                  | <b>T</b> | 1212.62        | 606.81                | 1195.60              | 598.30                 | 1194.61              | 597.81                 | <b>11</b> |
| <b>3</b>  | 287.13        | 144.07                | 270.11               | 135.56                 | 269.12               | 135.07                 | <b>N</b> | <b>1111.57</b> | 556.29                | 1094.55              | 547.78                 | 1093.56              | 547.29                 | <b>10</b> |
| <b>4</b>  | 388.18        | 194.59                | 371.16               | 186.08                 | 370.17               | 185.59                 | <b>T</b> | <b>997.53</b>  | 499.27                | 980.50               | 490.76                 | 979.52               | 490.26                 | <b>9</b>  |
| <b>5</b>  | 489.23        | 245.12                | 472.20               | 236.61                 | 471.22               | 236.11                 | <b>T</b> | <b>896.48</b>  | 448.75                | 879.46               | 440.23                 | 878.47               | 439.74                 | <b>8</b>  |
| <b>6</b>  | 576.26        | 288.63                | 559.24               | 280.12                 | 558.25               | 279.63                 | <b>S</b> | <b>795.44</b>  | 398.22                | 778.41               | 389.71                 | 777.43               | 389.22                 | <b>7</b>  |
| <b>7</b>  | 677.31        | 339.16                | 660.28               | 330.65                 | 659.30               | 330.15                 | <b>T</b> | <b>708.40</b>  | 354.71                | 691.38               | 346.19                 | 690.39               | 345.70                 | <b>6</b>  |
| <b>8</b>  | 790.39        | 395.70                | 773.37               | 387.19                 | 772.38               | 386.70                 | <b>I</b> | <b>607.36</b>  | 304.18                | 590.33               | 295.67                 | 589.35               | 295.18                 | <b>5</b>  |
| <b>9</b>  | 937.46        | 469.23                | 920.44               | 460.72                 | 919.45               | 460.23                 | <b>F</b> | <b>494.27</b>  | 247.64                | 477.25               | 239.13                 | 476.26               | 238.63                 | <b>4</b>  |
| <b>10</b> | 1008.50       | 504.75                | 991.47               | 496.24                 | 990.49               | 495.75                 | <b>A</b> | <b>347.20</b>  | 174.11                | 330.18               | 165.59                 | 329.19               | 165.10                 | <b>3</b>  |
| <b>11</b> | 1109.55       | 555.28                | 1092.52              | 546.76                 | 1091.54              | 546.27                 | <b>T</b> | 276.17         | 138.59                | 259.14               | 130.07                 | 258.16               | 129.58                 | <b>2</b>  |
| <b>12</b> |               |                       |                      |                        |                      |                        | <b>R</b> | 175.12         | 88.06                 | 158.09               | 79.55                  |                      |                        | <b>1</b>  |



MS/MS Fragmentation of ID280 **AFLNNITESVR**

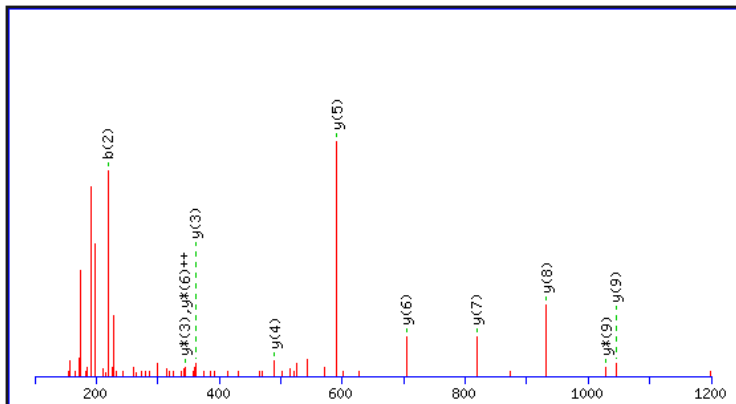

| #  | b             | b <sup>++</sup> | b <sup>*</sup> | b <sup>*++</sup> | b <sup>0</sup> | b <sup>0++</sup> | Seq. | y              | y <sup>++</sup> | y <sup>*</sup> | y <sup>*++</sup> | y <sup>0</sup> | y <sup>0++</sup> | #  |
|----|---------------|-----------------|----------------|------------------|----------------|------------------|------|----------------|-----------------|----------------|------------------|----------------|------------------|----|
| 1  | 72.04         | 36.53           |                |                  |                |                  | A    |                |                 |                |                  |                |                  | 11 |
| 2  | <b>219.11</b> | 110.06          |                |                  |                |                  | F    | 1192.63        | 596.82          | 1175.61        | 588.31           | 1174.62        | 587.81           | 10 |
| 3  | 332.20        | 166.60          |                |                  |                |                  | L    | <b>1045.56</b> | 523.29          | <b>1028.54</b> | 514.77           | 1027.55        | 514.28           | 9  |
| 4  | 446.24        | 223.62          | 429.21         | 215.11           |                |                  | N    | <b>932.48</b>  | 466.74          | 915.45         | 458.23           | 914.47         | 457.74           | 8  |
| 5  | 560.28        | 280.64          | 543.26         | 272.13           |                |                  | N    | <b>818.44</b>  | 409.72          | 801.41         | 401.21           | 800.43         | 400.72           | 7  |
| 6  | 673.37        | 337.19          | 656.34         | 328.67           |                |                  | I    | <b>704.39</b>  | 352.70          | 687.37         | <b>344.19</b>    | 686.38         | 343.70           | 6  |
| 7  | 774.41        | 387.71          | 757.39         | 379.20           | 756.40         | 378.71           | T    | <b>591.31</b>  | 296.16          | 574.28         | 287.65           | 573.30         | 287.15           | 5  |
| 8  | 903.46        | 452.23          | 886.43         | 443.72           | 885.45         | 443.23           | E    | <b>490.26</b>  | 245.63          | 473.24         | 237.12           | 472.25         | 236.63           | 4  |
| 9  | 990.49        | 495.75          | 973.46         | 487.23           | 972.48         | 486.74           | S    | <b>361.22</b>  | 181.11          | <b>344.19</b>  | 172.60           | 343.21         | 172.11           | 3  |
| 10 | 1089.56       | 545.28          | 1072.53        | 536.77           | 1071.55        | 536.28           | V    | 274.19         | 137.60          | 257.16         | 129.08           |                |                  | 2  |
| 11 |               |                 |                |                  |                |                  | R    | 175.12         | 88.06           | 158.09         | 79.55            |                |                  | 1  |

MS/MS Fragmentation of ID284 **LDDFSGWLR**

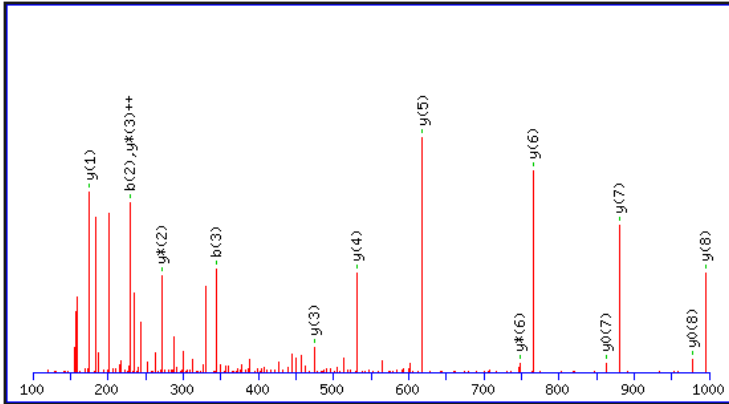

| # | b             | b <sup>++</sup> | b <sup>0</sup> | b <sup>0++</sup> | Seq. | y             | y <sup>++</sup> | y <sup>*</sup> | y <sup>*++</sup> | y <sup>0</sup> | y <sup>0++</sup> | # |
|---|---------------|-----------------|----------------|------------------|------|---------------|-----------------|----------------|------------------|----------------|------------------|---|
| 1 | 114.09        | 57.55           |                |                  | L    |               |                 |                |                  |                |                  | 9 |
| 2 | <b>229.12</b> | 115.06          | 211.11         | 106.06           | D    | <b>995.46</b> | 498.23          | 978.43         | 489.72           | <b>977.45</b>  | 489.23           | 8 |
| 3 | <b>344.15</b> | 172.58          | 326.13         | 163.57           | D    | <b>880.43</b> | 440.72          | 863.40         | 432.21           | <b>862.42</b>  | 431.71           | 7 |
| 4 | 491.21        | 246.11          | 473.20         | 237.11           | F    | <b>765.40</b> | 383.21          | <b>748.38</b>  | 374.69           | 747.39         | 374.20           | 6 |
| 5 | 578.25        | 289.63          | 560.24         | 280.62           | S    | <b>618.34</b> | 309.67          | 601.31         | 301.16           | 600.33         | 300.67           | 5 |
| 6 | 635.27        | 318.14          | 617.26         | 309.13           | G    | <b>531.30</b> | 266.16          | 514.28         | 257.64           |                |                  | 4 |
| 7 | 821.35        | 411.18          | 803.34         | 402.17           | W    | <b>474.28</b> | 237.64          | 457.26         | <b>229.13</b>    |                |                  | 3 |
| 8 | 934.43        | 467.72          | 916.42         | 458.71           | L    | 288.20        | 144.61          | <b>271.18</b>  | 136.09           |                |                  | 2 |
| 9 |               |                 |                |                  | R    | <b>175.12</b> | 88.06           | 158.09         | 79.55            |                |                  | 1 |

MS/MS Fragmentation of ID287 **SVQTLQGLR**

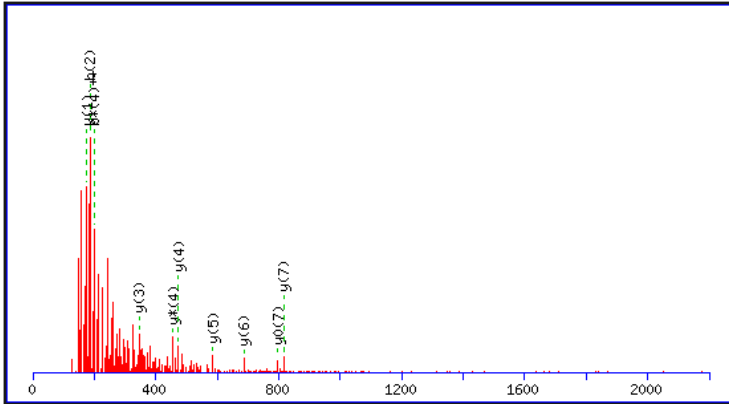

| # | b             | b <sup>++</sup> | b <sup>*</sup> | b <sup>*++</sup> | b <sup>0</sup> | b <sup>0++</sup> | Seq. | y             | y <sup>++</sup> | y <sup>*</sup> | y <sup>*++</sup> | y <sup>0</sup> | y <sup>0++</sup> | # |
|---|---------------|-----------------|----------------|------------------|----------------|------------------|------|---------------|-----------------|----------------|------------------|----------------|------------------|---|
| 1 | 88.04         | 44.52           |                |                  | 70.03          | 35.52            | S    |               |                 |                |                  |                |                  | 9 |
| 2 | <b>187.11</b> | 94.06           |                |                  | 169.10         | 85.05            | V    | 914.54        | 457.77          | 897.52         | 449.26           | 896.53         | 448.77           | 8 |
| 3 | 315.17        | 158.09          | 298.14         | 149.57           | 297.16         | 149.08           | Q    | <b>815.47</b> | 408.24          | 798.45         | 399.73           | <b>797.46</b>  | 399.24           | 7 |
| 4 | 416.21        | 208.61          | 399.19         | <b>200.10</b>    | 398.20         | 199.61           | T    | <b>687.41</b> | 344.21          | 670.39         | 335.70           | 669.40         | 335.21           | 6 |
| 5 | 529.30        | 265.15          | 512.27         | 256.64           | 511.29         | 256.15           | L    | <b>586.37</b> | 293.69          | 569.34         | 285.17           |                |                  | 5 |
| 6 | 657.36        | 329.18          | 640.33         | 320.67           | 639.35         | 320.18           | Q    | <b>473.28</b> | 237.15          | <b>456.26</b>  | 228.63           |                |                  | 4 |
| 7 | 714.38        | 357.69          | 697.35         | 349.18           | 696.37         | 348.69           | G    | <b>345.22</b> | 173.12          | 328.20         | 164.60           |                |                  | 3 |
| 8 | 827.46        | 414.23          | 810.44         | 405.72           | 809.45         | 405.23           | L    | 288.20        | 144.61          | 271.18         | 136.09           |                |                  | 2 |
| 9 |               |                 |                |                  |                |                  | R    | <b>175.12</b> | 88.06           | 158.09         | 79.55            |                |                  | 1 |

MS/MS Fragmentation of ID288 **DAQALFQSLR**

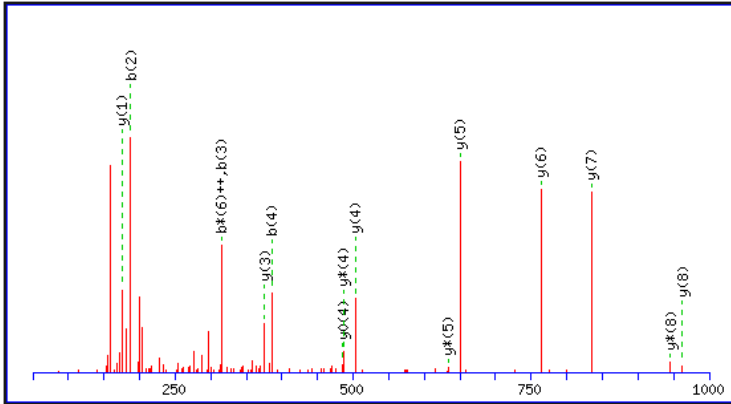

| #  | b             | b <sup>++</sup> | b*     | b <sup>+++</sup> | b <sup>0</sup> | b <sup>0++</sup> | Seq. | y             | y <sup>++</sup> | y*            | y <sup>+++</sup> | y <sup>0</sup> | y <sup>0++</sup> | #  |
|----|---------------|-----------------|--------|------------------|----------------|------------------|------|---------------|-----------------|---------------|------------------|----------------|------------------|----|
| 1  | 116.03        | 58.52           |        |                  | 98.02          | 49.52            | D    |               |                 |               |                  |                |                  | 10 |
| 2  | <b>187.07</b> | 94.04           |        |                  | 169.06         | 85.03            | A    | 1033.58       | 517.29          | 1016.55       | 508.78           | 1015.57        | 508.29           | 9  |
| 3  | <b>315.13</b> | 158.07          | 298.10 | 149.56           | 297.12         | 149.06           | Q    | <b>962.54</b> | 481.77          | <b>945.52</b> | 473.26           | 944.53         | 472.77           | 8  |
| 4  | <b>386.17</b> | 193.59          | 369.14 | 185.07           | 368.16         | 184.58           | A    | <b>834.48</b> | 417.75          | 817.46        | 409.23           | 816.47         | 408.74           | 7  |
| 5  | 499.25        | 250.13          | 482.22 | 241.62           | 481.24         | 241.12           | L    | <b>763.45</b> | 382.23          | 746.42        | 373.71           | 745.44         | 373.22           | 6  |
| 6  | 646.32        | 323.66          | 629.29 | <b>315.15</b>    | 628.31         | 314.66           | F    | <b>650.36</b> | 325.68          | <b>633.34</b> | 317.17           | 632.35         | 316.68           | 5  |
| 7  | 774.38        | 387.69          | 757.35 | 379.18           | 756.37         | 378.69           | Q    | <b>503.29</b> | 252.15          | <b>486.27</b> | 243.64           | <b>485.28</b>  | 243.15           | 4  |
| 8  | 861.41        | 431.21          | 844.38 | 422.70           | 843.40         | 422.20           | S    | <b>375.24</b> | 188.12          | 358.21        | 179.61           | 357.22         | 179.12           | 3  |
| 9  | 974.49        | 487.75          | 957.47 | 479.24           | 956.48         | 478.75           | L    | 288.20        | 144.61          | 271.18        | 136.09           |                |                  | 2  |
| 10 |               |                 |        |                  |                |                  | R    | <b>175.12</b> | 88.06           | 158.09        | 79.55            |                |                  | 1  |

MS/MS Fragmentation of ID290 **SVSSGGLDSR**

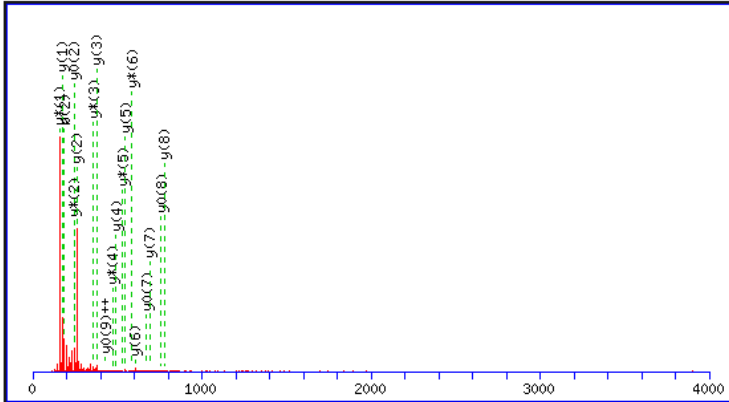

| #         | <b>b</b>      | <b>b<sup>++</sup></b> | <b>b<sup>0</sup></b> | <b>b<sup>0++</sup></b> | Seq.     | <b>y</b>      | <b>y<sup>++</sup></b> | <b>y<sup>*</sup></b> | <b>y<sup>*++</sup></b> | <b>y<sup>0</sup></b> | <b>y<sup>0++</sup></b> | #         |
|-----------|---------------|-----------------------|----------------------|------------------------|----------|---------------|-----------------------|----------------------|------------------------|----------------------|------------------------|-----------|
| <b>1</b>  | 88.04         | 44.52                 | 70.03                | 35.52                  | <b>S</b> |               |                       |                      |                        |                      |                        | <b>10</b> |
| <b>2</b>  | <b>187.11</b> | 94.06                 | 169.10               | 85.05                  | <b>V</b> | 877.44        | 439.22                | 860.41               | 430.71                 | 859.43               | <b>430.22</b>          | <b>9</b>  |
| <b>3</b>  | 274.14        | 137.57                | 256.13               | 128.57                 | <b>S</b> | <b>778.37</b> | 389.69                | 761.34               | 381.17                 | <b>760.36</b>        | 380.68                 | <b>8</b>  |
| <b>4</b>  | 361.17        | 181.09                | 343.16               | 172.08                 | <b>S</b> | <b>691.34</b> | 346.17                | 674.31               | 337.66                 | <b>673.33</b>        | 337.17                 | <b>7</b>  |
| <b>5</b>  | 418.19        | 209.60                | 400.18               | 200.59                 | <b>G</b> | <b>604.30</b> | 302.66                | <b>587.28</b>        | 294.14                 | 586.29               | 293.65                 | <b>6</b>  |
| <b>6</b>  | 475.21        | 238.11                | 457.20               | 229.11                 | <b>G</b> | <b>547.28</b> | 274.15                | <b>530.26</b>        | 265.63                 | 529.27               | 265.14                 | <b>5</b>  |
| <b>7</b>  | 588.30        | 294.65                | 570.29               | 285.65                 | <b>L</b> | <b>490.26</b> | 245.63                | <b>473.24</b>        | 237.12                 | 472.25               | 236.63                 | <b>4</b>  |
| <b>8</b>  | 703.33        | 352.17                | 685.32               | 343.16                 | <b>D</b> | <b>377.18</b> | 189.09                | <b>360.15</b>        | 180.58                 | 359.17               | 180.09                 | <b>3</b>  |
| <b>9</b>  | 790.36        | 395.68                | 772.35               | 386.68                 | <b>S</b> | <b>262.15</b> | 131.58                | <b>245.12</b>        | 123.07                 | <b>244.14</b>        | 122.57                 | <b>2</b>  |
| <b>10</b> |               |                       |                      |                        | <b>R</b> | <b>175.12</b> | 88.06                 | <b>158.09</b>        | 79.55                  |                      |                        | <b>1</b>  |

MS/MS Fragmentation of ID302 **AVDFYISDFQSGLR**

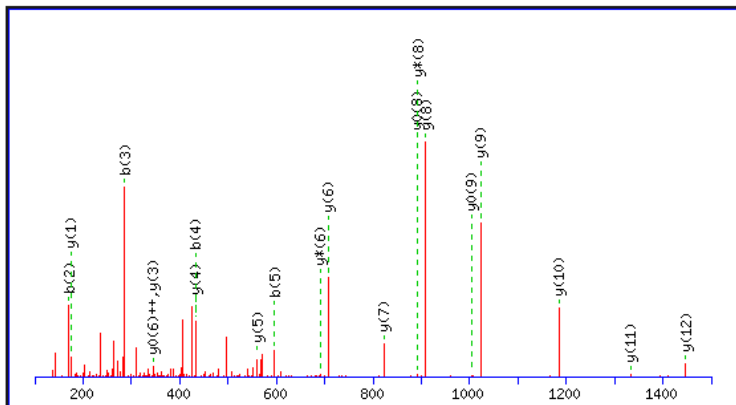

| #  | b       | b <sup>++</sup> | b*      | b <sup>*++</sup> | b <sup>0</sup> | b <sup>0++</sup> | Seq. | y       | y <sup>++</sup> | y*      | y <sup>*++</sup> | y <sup>0</sup> | y <sup>0++</sup> | #  |
|----|---------|-----------------|---------|------------------|----------------|------------------|------|---------|-----------------|---------|------------------|----------------|------------------|----|
| 1  | 72.04   | 36.53           |         |                  |                |                  | A    |         |                 |         |                  |                |                  | 14 |
| 2  | 171.11  | 86.06           |         |                  |                |                  | V    | 1546.75 | 773.88          | 1529.73 | 765.37           | 1528.74        | 764.88           | 13 |
| 3  | 286.14  | 143.57          |         |                  | 268.13         | 134.57           | D    | 1447.69 | 724.35          | 1430.66 | 715.83           | 1429.67        | 715.34           | 12 |
| 4  | 433.21  | 217.11          |         |                  | 415.20         | 208.10           | F    | 1332.66 | 666.83          | 1315.63 | 658.32           | 1314.65        | 657.83           | 11 |
| 5  | 596.27  | 298.64          |         |                  | 578.26         | 289.63           | Y    | 1185.59 | 593.30          | 1168.56 | 584.79           | 1167.58        | 584.29           | 10 |
| 6  | 709.36  | 355.18          |         |                  | 691.34         | 346.18           | I    | 1022.53 | 511.77          | 1005.50 | 503.25           | 1004.52        | 502.76           | 9  |
| 7  | 796.39  | 398.70          |         |                  | 778.38         | 389.69           | S    | 909.44  | 455.22          | 892.42  | 446.71           | 891.43         | 446.22           | 8  |
| 8  | 911.41  | 456.21          |         |                  | 893.40         | 447.21           | D    | 822.41  | 411.71          | 805.38  | 403.20           | 804.40         | 402.70           | 7  |
| 9  | 1058.48 | 529.75          |         |                  | 1040.47        | 520.74           | F    | 707.38  | 354.20          | 690.36  | 345.68           | 689.37         | 345.19           | 6  |
| 10 | 1186.54 | 593.77          | 1169.51 | 585.26           | 1168.53        | 584.77           | Q    | 560.32  | 280.66          | 543.29  | 272.15           | 542.30         | 271.66           | 5  |
| 11 | 1273.57 | 637.29          | 1256.55 | 628.78           | 1255.56        | 628.29           | S    | 432.26  | 216.63          | 415.23  | 208.12           | 414.25         | 207.63           | 4  |
| 12 | 1330.59 | 665.80          | 1313.57 | 657.29           | 1312.58        | 656.80           | G    | 345.22  | 173.12          | 328.20  | 164.60           |                |                  | 3  |
| 13 | 1443.68 | 722.34          | 1426.65 | 713.83           | 1425.67        | 713.34           | L    | 288.20  | 144.61          | 271.18  | 136.09           |                |                  | 2  |
| 14 |         |                 |         |                  |                |                  | R    | 175.12  | 88.06           | 158.09  | 79.55            |                |                  | 1  |

MS/MS Fragmentation of ID308 **YGLDTSEFSYNPSEPHR**

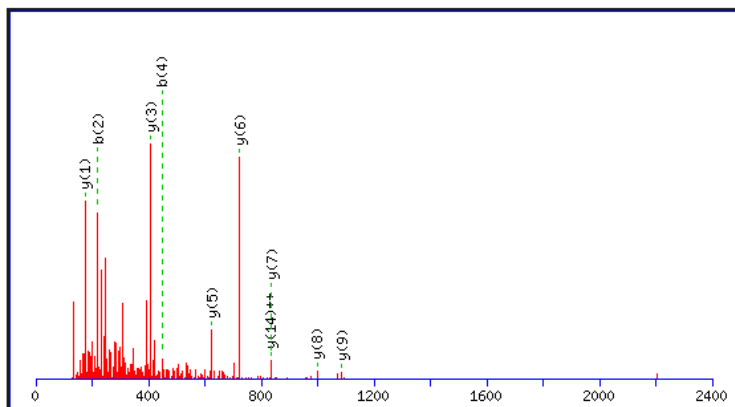

| #  | b             | b <sup>++</sup> | b*      | b <sup>*++</sup> | b <sup>0</sup> | b <sup>0++</sup> | Seq. | y              | y <sup>++</sup> | y*      | y <sup>*++</sup> | y <sup>0</sup> | y <sup>0++</sup> | #  |
|----|---------------|-----------------|---------|------------------|----------------|------------------|------|----------------|-----------------|---------|------------------|----------------|------------------|----|
| 1  | 164.07        | 82.54           |         |                  |                |                  | Y    |                |                 |         |                  |                |                  | 17 |
| 2  | <b>221.09</b> | 111.05          |         |                  |                |                  | G    | 1835.82        | 918.41          | 1818.79 | 909.90           | 1817.81        | 909.41           | 16 |
| 3  | 334.18        | 167.59          |         |                  |                |                  | L    | 1778.80        | 889.90          | 1761.77 | 881.39           | 1760.79        | 880.90           | 15 |
| 4  | <b>449.20</b> | 225.11          |         |                  | 431.19         | 216.10           | D    | 1665.71        | <b>833.36</b>   | 1648.69 | 824.85           | 1647.70        | 824.36           | 14 |
| 5  | 550.25        | 275.63          |         |                  | 532.24         | 266.62           | T    | 1550.69        | 775.85          | 1533.66 | 767.33           | 1532.68        | 766.84           | 13 |
| 6  | 637.28        | 319.15          |         |                  | 619.27         | 310.14           | S    | 1449.64        | 725.32          | 1432.61 | 716.81           | 1431.63        | 716.32           | 12 |
| 7  | 766.33        | 383.67          |         |                  | 748.31         | 374.66           | E    | 1362.61        | 681.81          | 1345.58 | 673.29           | 1344.60        | 672.80           | 11 |
| 8  | 913.39        | 457.20          |         |                  | 895.38         | 448.20           | F    | 1233.56        | 617.29          | 1216.54 | 608.77           | 1215.55        | 608.28           | 10 |
| 9  | 1000.43       | 500.72          |         |                  | 982.42         | 491.71           | S    | <b>1086.50</b> | 543.75          | 1069.47 | 535.24           | 1068.49        | 534.75           | 9  |
| 10 | 1163.49       | 582.25          |         |                  | 1145.48        | 573.24           | Y    | <b>999.46</b>  | 500.24          | 982.44  | 491.72           | 981.45         | 491.23           | 8  |
| 11 | 1277.53       | 639.27          | 1260.51 | 630.76           | 1259.52        | 630.26           | N    | <b>836.40</b>  | 418.70          | 819.37  | 410.19           | 818.39         | 409.70           | 7  |
| 12 | 1374.58       | 687.80          | 1357.56 | 679.28           | 1356.57        | 678.79           | P    | <b>722.36</b>  | 361.68          | 705.33  | 353.17           | 704.35         | 352.68           | 6  |
| 13 | 1461.62       | 731.31          | 1444.59 | 722.80           | 1443.61        | 722.31           | S    | <b>625.31</b>  | 313.16          | 608.28  | 304.64           | 607.29         | 304.15           | 5  |
| 14 | 1590.66       | 795.83          | 1573.63 | 787.32           | 1572.65        | 786.83           | E    | 538.27         | 269.64          | 521.25  | 261.13           | 520.26         | 260.63           | 4  |
| 15 | 1687.71       | 844.36          | 1670.69 | 835.85           | 1669.70        | 835.35           | P    | <b>409.23</b>  | 205.12          | 392.20  | 196.61           |                |                  | 3  |
| 16 | 1824.77       | 912.89          | 1807.74 | 904.38           | 1806.76        | 903.88           | H    | 312.18         | 156.59          | 295.15  | 148.08           |                |                  | 2  |
| 17 |               |                 |         |                  |                |                  | R    | <b>175.12</b>  | 88.06           | 158.09  | 79.55            |                |                  | 1  |

MS/MS Fragmentation of ID310 **DGVFQQESPFK**

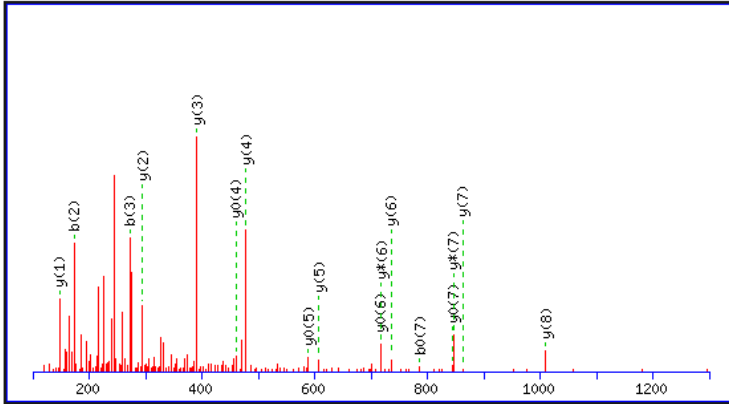

| #         | b             | b <sup>++</sup> | b*      | b <sup>*++</sup> | b <sup>0</sup> | b <sup>0++</sup> | Seq.     | y              | y <sup>++</sup> | y*            | y <sup>*++</sup> | y <sup>0</sup> | y <sup>0++</sup> | #         |
|-----------|---------------|-----------------|---------|------------------|----------------|------------------|----------|----------------|-----------------|---------------|------------------|----------------|------------------|-----------|
| <b>1</b>  | 116.03        | 58.52           |         |                  | 98.02          | 49.52            | <b>D</b> |                |                 |               |                  |                |                  | <b>11</b> |
| <b>2</b>  | <b>173.06</b> | 87.03           |         |                  | 155.05         | 78.03            | <b>G</b> | 1166.58        | 583.80          | 1149.56       | 575.28           | 1148.57        | 574.79           | <b>10</b> |
| <b>3</b>  | <b>272.12</b> | 136.57          |         |                  | 254.11         | 127.56           | <b>V</b> | 1109.56        | 555.28          | 1092.54       | 546.77           | 1091.55        | 546.28           | <b>9</b>  |
| <b>4</b>  | 419.19        | 210.10          |         |                  | 401.18         | 201.09           | <b>F</b> | <b>1010.49</b> | 505.75          | 993.47        | 497.24           | 992.48         | 496.75           | <b>8</b>  |
| <b>5</b>  | 547.25        | 274.13          | 530.22  | 265.62           | 529.24         | 265.12           | <b>Q</b> | <b>863.43</b>  | 432.22          | <b>846.40</b> | 423.70           | <b>845.42</b>  | 423.21           | <b>7</b>  |
| <b>6</b>  | 675.31        | 338.16          | 658.28  | 329.65           | 657.30         | 329.15           | <b>Q</b> | <b>735.37</b>  | 368.19          | <b>718.34</b> | 359.67           | <b>717.36</b>  | 359.18           | <b>6</b>  |
| <b>7</b>  | 804.35        | 402.68          | 787.33  | 394.17           | <b>786.34</b>  | 393.67           | <b>E</b> | <b>607.31</b>  | 304.16          | 590.28        | 295.64           | <b>589.30</b>  | 295.15           | <b>5</b>  |
| <b>8</b>  | 891.38        | 446.20          | 874.36  | 437.68           | 873.37         | 437.19           | <b>S</b> | <b>478.27</b>  | 239.64          | 461.24        | 231.12           | <b>460.26</b>  | 230.63           | <b>4</b>  |
| <b>9</b>  | 988.44        | 494.72          | 971.41  | 486.21           | 970.43         | 485.72           | <b>P</b> | <b>391.23</b>  | 196.12          | 374.21        | 187.61           |                |                  | <b>3</b>  |
| <b>10</b> | 1135.51       | 568.26          | 1118.48 | 559.74           | 1117.49        | 559.25           | <b>F</b> | <b>294.18</b>  | 147.59          | 277.15        | 139.08           |                |                  | <b>2</b>  |
| <b>11</b> |               |                 |         |                  |                |                  | <b>K</b> | <b>147.11</b>  | 74.06           | 130.09        | 65.55            |                |                  | <b>1</b>  |



MS/MS Fragmentation of ID311 **LTFLESSGIAK**

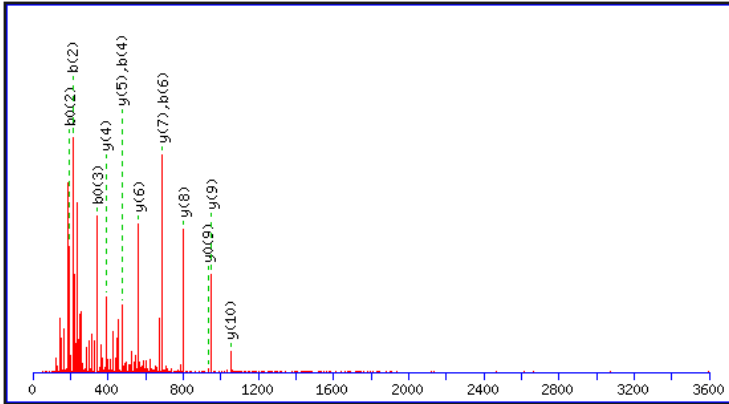

| #         | b             | b <sup>++</sup> | b <sup>0</sup> | b <sup>0++</sup> | Seq.     | y              | y <sup>++</sup> | y <sup>*</sup> | y <sup>*++</sup> | y <sup>0</sup> | y <sup>0++</sup> | #         |
|-----------|---------------|-----------------|----------------|------------------|----------|----------------|-----------------|----------------|------------------|----------------|------------------|-----------|
| <b>1</b>  | 114.09        | 57.55           |                |                  | <b>L</b> |                |                 |                |                  |                |                  | <b>11</b> |
| <b>2</b>  | <b>215.14</b> | 108.07          | <b>197.13</b>  | 99.07            | <b>T</b> | <b>1052.56</b> | 526.78          | 1035.54        | 518.27           | 1034.55        | 517.78           | <b>10</b> |
| <b>3</b>  | 362.21        | 181.61          | <b>344.20</b>  | 172.60           | <b>F</b> | <b>951.51</b>  | 476.26          | 934.49         | 467.75           | <b>933.50</b>  | 467.26           | <b>9</b>  |
| <b>4</b>  | <b>475.29</b> | 238.15          | 457.28         | 229.14           | <b>L</b> | <b>804.45</b>  | 402.73          | 787.42         | 394.21           | 786.44         | 393.72           | <b>8</b>  |
| <b>5</b>  | 604.33        | 302.67          | 586.32         | 293.67           | <b>E</b> | <b>691.36</b>  | 346.18          | 674.34         | 337.67           | 673.35         | 337.18           | <b>7</b>  |
| <b>6</b>  | <b>691.37</b> | 346.19          | 673.36         | 337.18           | <b>S</b> | <b>562.32</b>  | 281.66          | 545.29         | 273.15           | 544.31         | 272.66           | <b>6</b>  |
| <b>7</b>  | 778.40        | 389.70          | 760.39         | 380.70           | <b>S</b> | <b>475.29</b>  | 238.15          | 458.26         | 229.63           | 457.28         | 229.14           | <b>5</b>  |
| <b>8</b>  | 835.42        | 418.21          | 817.41         | 409.21           | <b>G</b> | <b>388.26</b>  | 194.63          | 371.23         | 186.12           |                |                  | <b>4</b>  |
| <b>9</b>  | 948.50        | 474.76          | 930.49         | 465.75           | <b>I</b> | 331.23         | 166.12          | 314.21         | 157.61           |                |                  | <b>3</b>  |
| <b>10</b> | 1019.54       | 510.27          | 1001.53        | 501.27           | <b>A</b> | 218.15         | 109.58          | 201.12         | 101.07           |                |                  | <b>2</b>  |
| <b>11</b> |               |                 |                |                  | <b>K</b> | 147.11         | 74.06           | 130.09         | 65.55            |                |                  | <b>1</b>  |

MS/MS Fragmentation of ID321 **ELGKPTVPLDR**

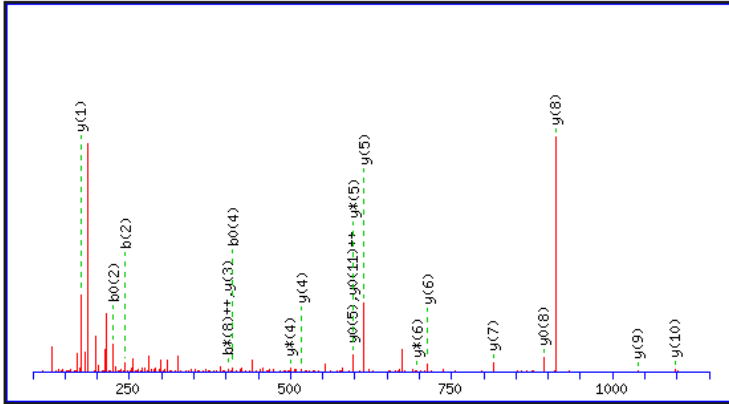

| #  | b             | b <sup>++</sup> | b*      | b <sup>*++</sup> | b <sup>0</sup> | b <sup>0++</sup> | Seq. | y              | y <sup>++</sup> | y*            | y <sup>*++</sup> | y <sup>0</sup> | y <sup>0++</sup> | #  |
|----|---------------|-----------------|---------|------------------|----------------|------------------|------|----------------|-----------------|---------------|------------------|----------------|------------------|----|
| 1  | 130.05        | 65.53           |         |                  | 112.04         | 56.52            | E    |                |                 |               |                  |                |                  | 12 |
| 2  | <b>243.13</b> | 122.07          |         |                  | <b>225.12</b>  | 113.07           | L    | 1209.69        | 605.35          | 1192.67       | 596.84           | 1191.68        | <b>596.35</b>    | 11 |
| 3  | 300.16        | 150.58          |         |                  | 282.14         | 141.58           | G    | <b>1096.61</b> | 548.81          | 1079.58       | 540.30           | 1078.60        | 539.80           | 10 |
| 4  | 428.25        | 214.63          | 411.22  | 206.12           | <b>410.24</b>  | 205.62           | K    | <b>1039.59</b> | 520.30          | 1022.56       | 511.79           | 1021.58        | 511.29           | 9  |
| 5  | 525.30        | 263.16          | 508.28  | 254.64           | 507.29         | 254.15           | P    | <b>911.49</b>  | 456.25          | 894.47        | 447.74           | <b>893.48</b>  | 447.25           | 8  |
| 6  | 626.35        | 313.68          | 609.32  | 305.17           | 608.34         | 304.67           | T    | <b>814.44</b>  | 407.72          | 797.42        | 399.21           | 796.43         | 398.72           | 7  |
| 7  | 725.42        | 363.21          | 708.39  | 354.70           | 707.41         | 354.21           | V    | <b>713.39</b>  | 357.20          | <b>696.37</b> | 348.69           | 695.38         | 348.20           | 6  |
| 8  | 822.47        | 411.74          | 805.45  | <b>403.23</b>    | 804.46         | 402.73           | P    | <b>614.33</b>  | 307.67          | <b>597.30</b> | 299.15           | <b>596.32</b>  | 298.66           | 5  |
| 9  | 936.51        | 468.76          | 919.49  | 460.25           | 918.50         | 459.76           | N    | <b>517.27</b>  | 259.14          | <b>500.25</b> | 250.63           | 499.26         | 250.13           | 4  |
| 10 | 1049.60       | 525.30          | 1032.57 | 516.79           | 1031.59        | 516.30           | L    | <b>403.23</b>  | 202.12          | 386.20        | 193.61           | 385.22         | 193.11           | 3  |
| 11 | 1164.63       | 582.82          | 1147.60 | 574.30           | 1146.62        | 573.81           | D    | 290.15         | 145.58          | 273.12        | 137.06           | 272.14         | 136.57           | 2  |
| 12 |               |                 |         |                  |                |                  | R    | <b>175.12</b>  | 88.06           | 158.09        | 79.55            |                |                  | 1  |

MS/MS Fragmentation of ID323 **VVINHLSSPEAGFLR**

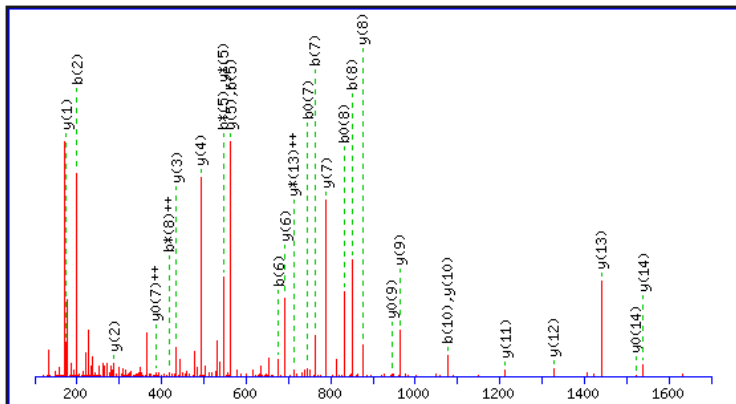

| #  | b       | b <sup>++</sup> | b*      | b <sup>*++</sup> | b <sup>0</sup> | b <sup>0++</sup> | Seq. | y       | y <sup>++</sup> | y*      | y <sup>*++</sup> | y <sup>0</sup> | y <sup>0++</sup> | #  |
|----|---------|-----------------|---------|------------------|----------------|------------------|------|---------|-----------------|---------|------------------|----------------|------------------|----|
| 1  | 100.08  | 50.54           |         |                  |                |                  | V    |         |                 |         |                  |                |                  | 15 |
| 2  | 199.14  | 100.08          |         |                  |                |                  | V    | 1539.83 | 770.42          | 1522.80 | 761.90           | 1521.82        | 761.41           | 14 |
| 3  | 312.23  | 156.62          |         |                  |                |                  | I    | 1440.76 | 720.88          | 1423.73 | 712.37           | 1422.75        | 711.88           | 13 |
| 4  | 426.27  | 213.64          | 409.24  | 205.13           |                |                  | N    | 1327.68 | 664.34          | 1310.65 | 655.83           | 1309.66        | 655.34           | 12 |
| 5  | 563.33  | 282.17          | 546.30  | 273.66           |                |                  | H    | 1213.63 | 607.32          | 1196.61 | 598.81           | 1195.62        | 598.31           | 11 |
| 6  | 676.41  | 338.71          | 659.39  | 330.20           |                |                  | L    | 1076.57 | 538.79          | 1059.55 | 530.28           | 1058.56        | 529.79           | 10 |
| 7  | 763.45  | 382.23          | 746.42  | 373.71           | 745.44         | 373.22           | S    | 963.49  | 482.25          | 946.46  | 473.74           | 945.48         | 473.24           | 9  |
| 8  | 850.48  | 425.74          | 833.45  | 417.23           | 832.47         | 416.74           | S    | 876.46  | 438.73          | 859.43  | 430.22           | 858.45         | 429.73           | 8  |
| 9  | 947.53  | 474.27          | 930.50  | 465.76           | 929.52         | 465.26           | P    | 789.43  | 395.22          | 772.40  | 386.70           | 771.41         | 386.21           | 7  |
| 10 | 1076.57 | 538.79          | 1059.55 | 530.28           | 1058.56        | 529.79           | E    | 692.37  | 346.69          | 675.35  | 338.18           | 674.36         | 337.68           | 6  |
| 11 | 1147.61 | 574.31          | 1130.58 | 565.80           | 1129.60        | 565.30           | A    | 563.33  | 282.17          | 546.30  | 273.66           |                |                  | 5  |
| 12 | 1204.63 | 602.82          | 1187.61 | 594.31           | 1186.62        | 593.81           | G    | 492.29  | 246.65          | 475.27  | 238.14           |                |                  | 4  |
| 13 | 1351.70 | 676.35          | 1334.67 | 667.84           | 1333.69        | 667.35           | F    | 435.27  | 218.14          | 418.24  | 209.63           |                |                  | 3  |
| 14 | 1464.78 | 732.90          | 1447.76 | 724.38           | 1446.77        | 723.89           | L    | 288.20  | 144.61          | 271.18  | 136.09           |                |                  | 2  |
| 15 |         |                 |         |                  |                |                  | R    | 175.12  | 88.06           | 158.09  | 79.55            |                |                  | 1  |

MS/MS Fragmentation of ID326 **QDTGEVDVLTK**

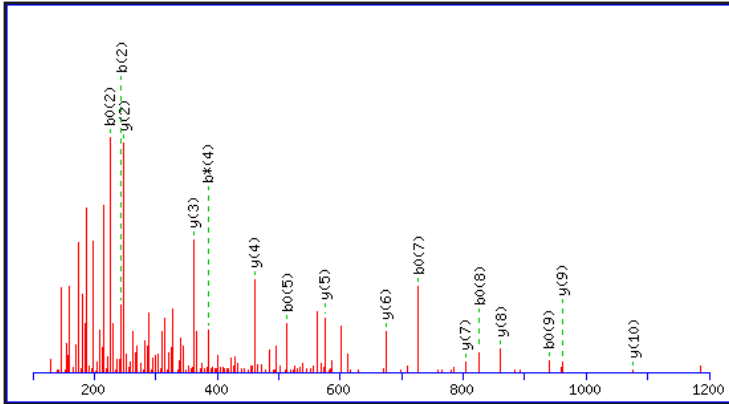

| #         | <b>b</b>      | <b>b<sup>++</sup></b> | <b>b<sup>*</sup></b> | <b>b<sup>*++</sup></b> | <b>b<sup>0</sup></b> | <b>b<sup>0++</sup></b> | Seq.     | <b>y</b>       | <b>y<sup>++</sup></b> | <b>y<sup>*</sup></b> | <b>y<sup>*++</sup></b> | <b>y<sup>0</sup></b> | <b>y<sup>0++</sup></b> | #         |
|-----------|---------------|-----------------------|----------------------|------------------------|----------------------|------------------------|----------|----------------|-----------------------|----------------------|------------------------|----------------------|------------------------|-----------|
| <b>1</b>  | 129.07        | 65.04                 | 112.04               | 56.52                  |                      |                        | <b>Q</b> |                |                       |                      |                        |                      |                        | <b>11</b> |
| <b>2</b>  | <b>244.09</b> | 122.55                | 227.07               | 114.04                 | <b>226.08</b>        | 113.54                 | <b>D</b> | <b>1076.55</b> | 538.78                | 1059.52              | 530.26                 | 1058.54              | 529.77                 | <b>10</b> |
| <b>3</b>  | 345.14        | 173.07                | 328.11               | 164.56                 | 327.13               | 164.07                 | <b>T</b> | <b>961.52</b>  | 481.26                | 944.49               | 472.75                 | 943.51               | 472.26                 | <b>9</b>  |
| <b>4</b>  | 402.16        | 201.58                | <b>385.14</b>        | 193.07                 | 384.15               | 192.58                 | <b>G</b> | <b>860.47</b>  | 430.74                | 843.45               | 422.23                 | 842.46               | 421.73                 | <b>8</b>  |
| <b>5</b>  | 531.20        | 266.11                | 514.18               | 257.59                 | <b>513.19</b>        | 257.10                 | <b>E</b> | <b>803.45</b>  | 402.23                | 786.42               | 393.72                 | 785.44               | 393.22                 | <b>7</b>  |
| <b>6</b>  | 630.27        | 315.64                | 613.25               | 307.13                 | 612.26               | 306.63                 | <b>V</b> | <b>674.41</b>  | 337.71                | 657.38               | 329.19                 | 656.40               | 328.70                 | <b>6</b>  |
| <b>7</b>  | 745.30        | 373.15                | 728.27               | 364.64                 | <b>727.29</b>        | 364.15                 | <b>D</b> | <b>575.34</b>  | 288.17                | 558.31               | 279.66                 | 557.33               | 279.17                 | <b>5</b>  |
| <b>8</b>  | 844.37        | 422.69                | 827.34               | 414.17                 | <b>826.36</b>        | 413.68                 | <b>V</b> | <b>460.31</b>  | 230.66                | 443.29               | 222.15                 | 442.30               | 221.65                 | <b>4</b>  |
| <b>9</b>  | 957.45        | 479.23                | 940.43               | 470.72                 | <b>939.44</b>        | 470.22                 | <b>L</b> | <b>361.24</b>  | 181.13                | 344.22               | 172.61                 | 343.23               | 172.12                 | <b>3</b>  |
| <b>10</b> | 1058.50       | 529.75                | 1041.47              | 521.24                 | 1040.49              | 520.75                 | <b>T</b> | <b>248.16</b>  | 124.58                | 231.13               | 116.07                 | 230.15               | 115.58                 | <b>2</b>  |
| <b>11</b> |               |                       |                      |                        |                      |                        | <b>K</b> | 147.11         | 74.06                 | 130.09               | 65.55                  |                      |                        | <b>1</b>  |

MS/MS Fragmentation of ID327 **DGVLVEGLFWK**

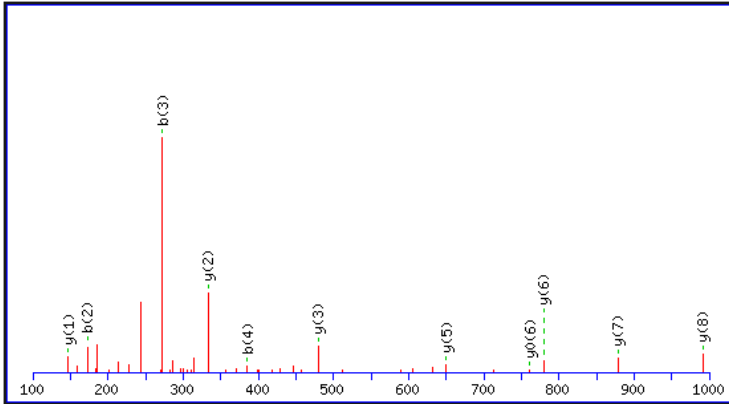

| #         | <b>b</b>      | <b>b<sup>++</sup></b> | <b>b<sup>0</sup></b> | <b>b<sup>0++</sup></b> | Seq.     | <b>y</b>      | <b>y<sup>++</sup></b> | <b>y<sup>*</sup></b> | <b>y<sup>*++</sup></b> | <b>y<sup>0</sup></b> | <b>y<sup>0++</sup></b> | #         |
|-----------|---------------|-----------------------|----------------------|------------------------|----------|---------------|-----------------------|----------------------|------------------------|----------------------|------------------------|-----------|
| <b>1</b>  | 116.03        | 58.52                 | 98.02                | 49.52                  | <b>D</b> |               |                       |                      |                        |                      |                        | <b>11</b> |
| <b>2</b>  | <b>173.06</b> | 87.03                 | 155.05               | 78.03                  | <b>G</b> | 1147.65       | 574.33                | 1130.62              | 565.82                 | 1129.64              | 565.32                 | <b>10</b> |
| <b>3</b>  | <b>272.12</b> | 136.57                | 254.11               | 127.56                 | <b>V</b> | 1090.63       | 545.82                | 1073.60              | 537.31                 | 1072.62              | 536.81                 | <b>9</b>  |
| <b>4</b>  | <b>385.21</b> | 193.11                | 367.20               | 184.10                 | <b>L</b> | <b>991.56</b> | 496.28                | 974.53               | 487.77                 | 973.55               | 487.28                 | <b>8</b>  |
| <b>5</b>  | 484.28        | 242.64                | 466.27               | 233.64                 | <b>V</b> | <b>878.48</b> | 439.74                | 861.45               | 431.23                 | 860.47               | 430.74                 | <b>7</b>  |
| <b>6</b>  | 613.32        | 307.16                | 595.31               | 298.16                 | <b>E</b> | <b>779.41</b> | 390.21                | 762.38               | 381.69                 | <b>761.40</b>        | 381.20                 | <b>6</b>  |
| <b>7</b>  | 670.34        | 335.67                | 652.33               | 326.67                 | <b>G</b> | <b>650.37</b> | 325.69                | 633.34               | 317.17                 |                      |                        | <b>5</b>  |
| <b>8</b>  | 783.42        | 392.22                | 765.41               | 383.21                 | <b>L</b> | 593.34        | 297.18                | 576.32               | 288.66                 |                      |                        | <b>4</b>  |
| <b>9</b>  | 930.49        | 465.75                | 912.48               | 456.74                 | <b>F</b> | <b>480.26</b> | 240.63                | 463.23               | 232.12                 |                      |                        | <b>3</b>  |
| <b>10</b> | 1116.57       | 558.79                | 1098.56              | 549.78                 | <b>W</b> | <b>333.19</b> | 167.10                | 316.17               | 158.59                 |                      |                        | <b>2</b>  |
| <b>11</b> |               |                       |                      |                        | <b>K</b> | <b>147.11</b> | 74.06                 | 130.09               | 65.55                  |                      |                        | <b>1</b>  |

MS/MS Fragmentation of ID329 **EMVVDNMR**

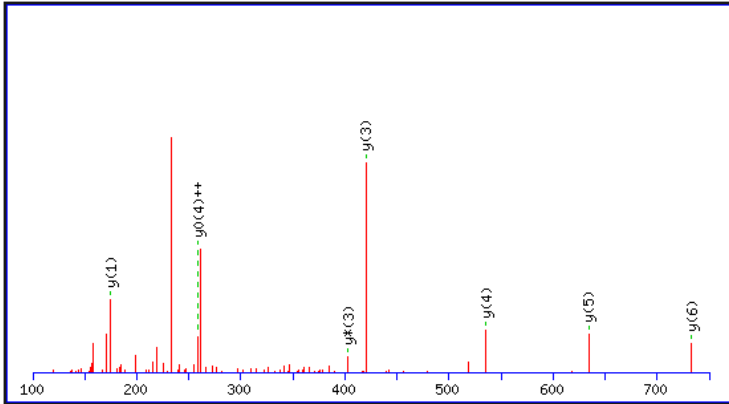

| #        | <b>b</b> | <b>b<sup>++</sup></b> | <b>b<sup>*</sup></b> | <b>b<sup>*++</sup></b> | <b>b<sup>0</sup></b> | <b>b<sup>0++</sup></b> | Seq.     | <b>y</b>      | <b>y<sup>++</sup></b> | <b>y<sup>*</sup></b> | <b>y<sup>*++</sup></b> | <b>y<sup>0</sup></b> | <b>y<sup>0++</sup></b> | #        |
|----------|----------|-----------------------|----------------------|------------------------|----------------------|------------------------|----------|---------------|-----------------------|----------------------|------------------------|----------------------|------------------------|----------|
| <b>1</b> | 130.05   | 65.53                 |                      |                        | 112.04               | 56.52                  | <b>E</b> |               |                       |                      |                        |                      |                        | <b>8</b> |
| <b>2</b> | 261.09   | 131.05                |                      |                        | 243.08               | 122.04                 | <b>M</b> | 864.41        | 432.71                | 847.38               | 424.19                 | 846.40               | 423.70                 | <b>7</b> |
| <b>3</b> | 360.16   | 180.58                |                      |                        | 342.15               | 171.58                 | <b>V</b> | <b>733.37</b> | 367.19                | 716.34               | 358.67                 | 715.36               | 358.18                 | <b>6</b> |
| <b>4</b> | 459.23   | 230.12                |                      |                        | 441.22               | 221.11                 | <b>V</b> | <b>634.30</b> | 317.65                | 617.27               | 309.14                 | 616.29               | 308.65                 | <b>5</b> |
| <b>5</b> | 574.25   | 287.63                |                      |                        | 556.24               | 278.63                 | <b>D</b> | <b>535.23</b> | 268.12                | 518.20               | 259.61                 | 517.22               | <b>259.11</b>          | <b>4</b> |
| <b>6</b> | 688.30   | 344.65                | 671.27               | 336.14                 | 670.29               | 335.65                 | <b>N</b> | <b>420.20</b> | 210.60                | <b>403.18</b>        | 202.09                 |                      |                        | <b>3</b> |
| <b>7</b> | 819.34   | 410.17                | 802.31               | 401.66                 | 801.33               | 401.17                 | <b>M</b> | 306.16        | 153.58                | 289.13               | 145.07                 |                      |                        | <b>2</b> |
| <b>8</b> |          |                       |                      |                        |                      |                        | <b>R</b> | <b>175.12</b> | 88.06                 | 158.09               | 79.55                  |                      |                        | <b>1</b> |

MS/MS Fragmentation of ID336 **TFSVGDLSLVFN YGGGHTVDEVR**

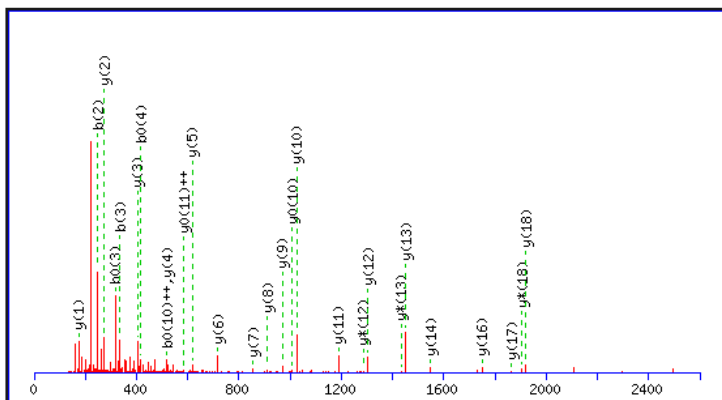

| #  | b             | b <sup>++</sup> | b*      | b <sup>+++</sup> | b <sup>0</sup> | b <sup>0++</sup> | Seq. | y              | y <sup>++</sup> | y*             | y <sup>+++</sup> | y <sup>0</sup> | y <sup>0++</sup> | #  |
|----|---------------|-----------------|---------|------------------|----------------|------------------|------|----------------|-----------------|----------------|------------------|----------------|------------------|----|
| 1  | 102.05        | 51.53           |         |                  | 84.04          | 42.53            | T    |                |                 |                |                  |                |                  | 22 |
| 2  | <b>249.12</b> | 125.07          |         |                  | 231.11         | 116.06           | F    | 2255.07        | 1128.04         | 2238.05        | 1119.53          | 2237.06        | 1119.03          | 21 |
| 3  | <b>336.16</b> | 168.58          |         |                  | <b>318.14</b>  | 159.58           | S    | 2108.00        | 1054.51         | 2090.98        | 1045.99          | 2089.99        | 1045.50          | 20 |
| 4  | 435.22        | 218.12          |         |                  | <b>417.21</b>  | 209.11           | V    | 2020.97        | 1010.99         | 2003.95        | 1002.48          | 2002.96        | 1001.98          | 19 |
| 5  | 492.25        | 246.63          |         |                  | 474.23         | 237.62           | G    | <b>1921.90</b> | 961.46          | <b>1904.88</b> | 952.94           | 1903.89        | 952.45           | 18 |
| 6  | 607.27        | 304.14          |         |                  | 589.26         | 295.13           | D    | <b>1864.88</b> | 932.94          | 1847.86        | 924.43           | 1846.87        | 923.94           | 17 |
| 7  | 694.30        | 347.66          |         |                  | 676.29         | 338.65           | S    | <b>1749.86</b> | 875.43          | 1732.83        | 866.92           | 1731.84        | 866.43           | 16 |
| 8  | 807.39        | 404.20          |         |                  | 789.38         | 395.19           | L    | 1662.82        | 831.92          | 1645.80        | 823.40           | 1644.81        | 822.91           | 15 |
| 9  | 906.46        | 453.73          |         |                  | 888.45         | 444.73           | V    | <b>1549.74</b> | 775.37          | 1532.71        | 766.86           | 1531.73        | 766.37           | 14 |
| 10 | 1053.53       | 527.27          |         |                  | 1035.51        | <b>518.26</b>    | F    | <b>1450.67</b> | 725.84          | <b>1433.64</b> | 717.33           | 1432.66        | 716.83           | 13 |
| 11 | 1167.57       | 584.29          | 1150.54 | 575.77           | 1149.56        | 575.28           | N    | <b>1303.60</b> | 652.30          | <b>1286.58</b> | 643.79           | 1285.59        | 643.30           | 12 |
| 12 | 1330.63       | 665.82          | 1313.60 | 657.31           | 1312.62        | 656.81           | Y    | <b>1189.56</b> | 595.28          | 1172.53        | 586.77           | 1171.55        | <b>586.28</b>    | 11 |
| 13 | 1387.65       | 694.33          | 1370.63 | 685.82           | 1369.64        | 685.32           | G    | <b>1026.50</b> | 513.75          | 1009.47        | 505.24           | <b>1008.49</b> | 504.75           | 10 |
| 14 | 1444.67       | 722.84          | 1427.65 | 714.33           | 1426.66        | 713.84           | G    | <b>969.47</b>  | 485.24          | 952.45         | 476.73           | 951.46         | 476.24           | 9  |
| 15 | 1501.70       | 751.35          | 1484.67 | 742.84           | 1483.69        | 742.35           | G    | <b>912.45</b>  | 456.73          | 895.43         | 448.22           | 894.44         | 447.73           | 8  |
| 16 | 1638.75       | 819.88          | 1621.73 | 811.37           | 1620.74        | 810.88           | H    | <b>855.43</b>  | 428.22          | 838.41         | 419.71           | 837.42         | 419.21           | 7  |
| 17 | 1739.80       | 870.40          | 1722.78 | 861.89           | 1721.79        | 861.40           | T    | <b>718.37</b>  | 359.69          | 701.35         | 351.18           | 700.36         | 350.68           | 6  |
| 18 | 1838.87       | 919.94          | 1821.84 | 911.43           | 1820.86        | 910.93           | V    | <b>617.33</b>  | 309.17          | 600.30         | 300.65           | 599.31         | 300.16           | 5  |
| 19 | 1953.90       | 977.45          | 1936.87 | 968.94           | 1935.89        | 968.45           | D    | <b>518.26</b>  | 259.63          | 501.23         | 251.12           | 500.25         | 250.63           | 4  |
| 20 | 2082.94       | 1041.97         | 2065.91 | 1033.46          | 2064.93        | 1032.97          | E    | <b>403.23</b>  | 202.12          | 386.20         | 193.61           | 385.22         | 193.11           | 3  |
| 21 | 2182.01       | 1091.51         | 2164.98 | 1082.99          | 2164.00        | 1082.50          | V    | <b>274.19</b>  | 137.60          | 257.16         | 129.08           |                |                  | 2  |
| 22 |               |                 |         |                  |                |                  | R    | <b>175.12</b>  | 88.06           | 158.09         | 79.55            |                |                  | 1  |

MS/MS Fragmentation of ID337 **LVVVVLADR**

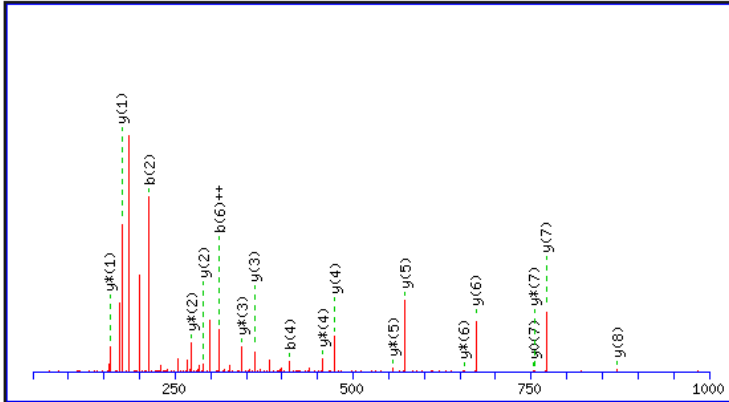

| # | <b>b</b>      | <b>b<sup>++</sup></b> | <b>b<sup>0</sup></b> | <b>b<sup>0++</sup></b> | Seq.     | <b>y</b>      | <b>y<sup>++</sup></b> | <b>y*</b>     | <b>y<sup>+++</sup></b> | <b>y<sup>0</sup></b> | <b>y<sup>0++</sup></b> | #        |
|---|---------------|-----------------------|----------------------|------------------------|----------|---------------|-----------------------|---------------|------------------------|----------------------|------------------------|----------|
| 1 | 114.09        | 57.55                 |                      |                        | <b>L</b> |               |                       |               |                        |                      |                        | <b>9</b> |
| 2 | <b>213.16</b> | 107.08                |                      |                        | <b>V</b> | <b>870.54</b> | 435.77                | 853.51        | 427.26                 | 852.53               | 426.77                 | <b>8</b> |
| 3 | <b>312.23</b> | 156.62                |                      |                        | <b>V</b> | <b>771.47</b> | 386.24                | <b>754.45</b> | 377.73                 | <b>753.46</b>        | 377.23                 | <b>7</b> |
| 4 | <b>411.30</b> | 206.15                |                      |                        | <b>V</b> | <b>672.40</b> | 336.71                | <b>655.38</b> | 328.19                 | 654.39               | 327.70                 | <b>6</b> |
| 5 | 510.36        | 255.69                |                      |                        | <b>V</b> | <b>573.34</b> | 287.17                | <b>556.31</b> | 278.66                 | 555.32               | 278.17                 | <b>5</b> |
| 6 | 623.45        | <b>312.23</b>         |                      |                        | <b>L</b> | <b>474.27</b> | 237.64                | <b>457.24</b> | 229.12                 | 456.26               | 228.63                 | <b>4</b> |
| 7 | 694.49        | 347.75                |                      |                        | <b>A</b> | <b>361.18</b> | 181.10                | <b>344.16</b> | 172.58                 | 343.17               | 172.09                 | <b>3</b> |
| 8 | 809.51        | 405.26                | 791.50               | 396.25                 | <b>D</b> | <b>290.15</b> | 145.58                | <b>273.12</b> | 137.06                 | 272.14               | 136.57                 | <b>2</b> |
| 9 |               |                       |                      |                        | <b>R</b> | <b>175.12</b> | 88.06                 | <b>158.09</b> | 79.55                  |                      |                        | <b>1</b> |



MS/MS Fragmentation of ID338 **NLLNDVLQR**

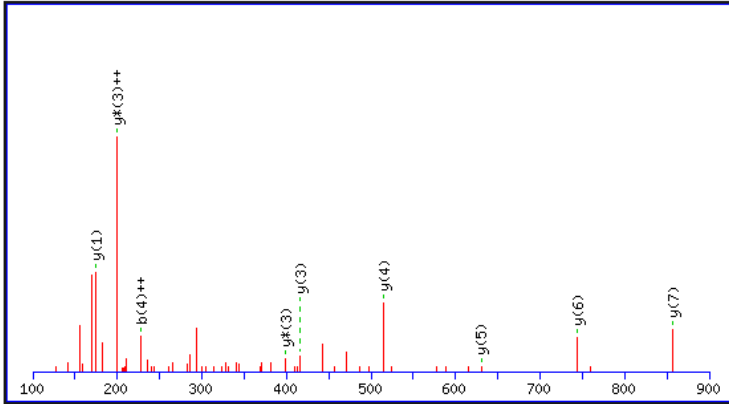

| #        | <b>b</b>      | <b>b<sup>++</sup></b> | <b>b<sup>*</sup></b> | <b>b<sup>*++</sup></b> | <b>b<sup>0</sup></b> | <b>b<sup>0++</sup></b> | Seq.     | <b>y</b>      | <b>y<sup>++</sup></b> | <b>y<sup>*</sup></b> | <b>y<sup>*++</sup></b> | <b>y<sup>0</sup></b> | <b>y<sup>0++</sup></b> | #        |
|----------|---------------|-----------------------|----------------------|------------------------|----------------------|------------------------|----------|---------------|-----------------------|----------------------|------------------------|----------------------|------------------------|----------|
| <b>1</b> | 115.05        | 58.03                 | 98.02                | 49.52                  |                      |                        | <b>N</b> |               |                       |                      |                        |                      |                        | <b>9</b> |
| <b>2</b> | <b>228.13</b> | 114.57                | 211.11               | 106.06                 |                      |                        | <b>L</b> | 970.57        | 485.79                | 953.54               | 477.27                 | 952.56               | 476.78                 | <b>8</b> |
| <b>3</b> | 341.22        | 171.11                | 324.19               | 162.60                 |                      |                        | <b>L</b> | <b>857.48</b> | 429.25                | 840.46               | 420.73                 | 839.47               | 420.24                 | <b>7</b> |
| <b>4</b> | 455.26        | <b>228.13</b>         | 438.23               | 219.62                 |                      |                        | <b>N</b> | <b>744.40</b> | 372.70                | 727.37               | 364.19                 | 726.39               | 363.70                 | <b>6</b> |
| <b>5</b> | 570.29        | 285.65                | 553.26               | 277.13                 | 552.28               | 276.64                 | <b>D</b> | <b>630.36</b> | 315.68                | 613.33               | 307.17                 | 612.35               | 306.68                 | <b>5</b> |
| <b>6</b> | 669.36        | 335.18                | 652.33               | 326.67                 | 651.35               | 326.18                 | <b>V</b> | <b>515.33</b> | 258.17                | 498.30               | 249.66                 |                      |                        | <b>4</b> |
| <b>7</b> | 782.44        | 391.72                | 765.41               | 383.21                 | 764.43               | 382.72                 | <b>L</b> | <b>416.26</b> | 208.63                | <b>399.24</b>        | <b>200.12</b>          |                      |                        | <b>3</b> |
| <b>8</b> | 910.50        | 455.75                | 893.47               | 447.24                 | 892.49               | 446.75                 | <b>Q</b> | 303.18        | 152.09                | 286.15               | 143.58                 |                      |                        | <b>2</b> |
| <b>9</b> |               |                       |                      |                        |                      |                        | <b>R</b> | <b>175.12</b> | 88.06                 | 158.09               | 79.55                  |                      |                        | <b>1</b> |

MS/MS Fragmentation of ID339 **TQSFFASLVR**

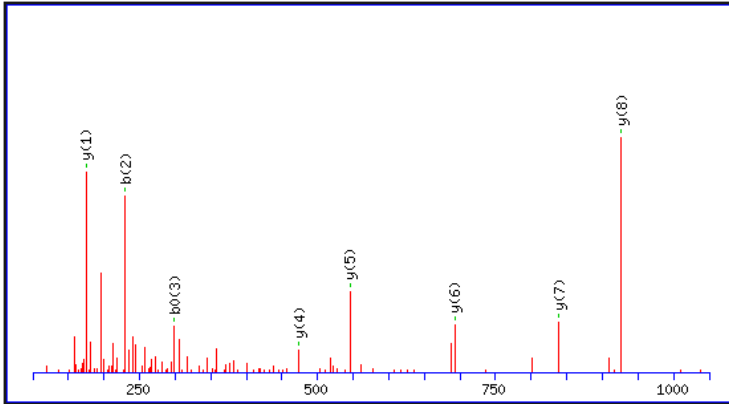

| #         | <b>b</b>      | <b>b<sup>++</sup></b> | <b>b<sup>*</sup></b> | <b>b<sup>*++</sup></b> | <b>b<sup>0</sup></b> | <b>b<sup>0++</sup></b> | Seq.     | <b>y</b>      | <b>y<sup>++</sup></b> | <b>y<sup>*</sup></b> | <b>y<sup>*++</sup></b> | <b>y<sup>0</sup></b> | <b>y<sup>0++</sup></b> | #         |
|-----------|---------------|-----------------------|----------------------|------------------------|----------------------|------------------------|----------|---------------|-----------------------|----------------------|------------------------|----------------------|------------------------|-----------|
| <b>1</b>  | 102.05        | 51.53                 |                      |                        | 84.04                | 42.53                  | <b>T</b> |               |                       |                      |                        |                      |                        | <b>10</b> |
| <b>2</b>  | <b>230.11</b> | 115.56                | 213.09               | 107.05                 | 212.10               | 106.56                 | <b>Q</b> | 1054.57       | 527.79                | 1037.54              | 519.27                 | 1036.56              | 518.78                 | <b>9</b>  |
| <b>3</b>  | 317.15        | 159.08                | 300.12               | 150.56                 | <b>299.14</b>        | 150.07                 | <b>S</b> | <b>926.51</b> | 463.76                | 909.48               | 455.25                 | 908.50               | 454.75                 | <b>8</b>  |
| <b>4</b>  | 464.21        | 232.61                | 447.19               | 224.10                 | 446.20               | 223.61                 | <b>F</b> | <b>839.48</b> | 420.24                | 822.45               | 411.73                 | 821.47               | 411.24                 | <b>7</b>  |
| <b>5</b>  | 611.28        | 306.14                | 594.26               | 297.63                 | 593.27               | 297.14                 | <b>F</b> | <b>692.41</b> | 346.71                | 675.38               | 338.19                 | 674.40               | 337.70                 | <b>6</b>  |
| <b>6</b>  | 682.32        | 341.66                | 665.29               | 333.15                 | 664.31               | 332.66                 | <b>A</b> | <b>545.34</b> | 273.17                | 528.31               | 264.66                 | 527.33               | 264.17                 | <b>5</b>  |
| <b>7</b>  | 769.35        | 385.18                | 752.32               | 376.67                 | 751.34               | 376.17                 | <b>S</b> | <b>474.30</b> | 237.66                | 457.28               | 229.14                 | 456.29               | 228.65                 | <b>4</b>  |
| <b>8</b>  | 882.44        | 441.72                | 865.41               | 433.21                 | 864.43               | 432.72                 | <b>L</b> | 387.27        | 194.14                | 370.24               | 185.63                 |                      |                        | <b>3</b>  |
| <b>9</b>  | 981.50        | 491.26                | 964.48               | 482.74                 | 963.49               | 482.25                 | <b>V</b> | 274.19        | 137.60                | 257.16               | 129.08                 |                      |                        | <b>2</b>  |
| <b>10</b> |               |                       |                      |                        |                      |                        | <b>R</b> | <b>175.12</b> | 88.06                 | 158.09               | 79.55                  |                      |                        | <b>1</b>  |

MS/MS Fragmentation of ID342 **DPNSLEDILR**

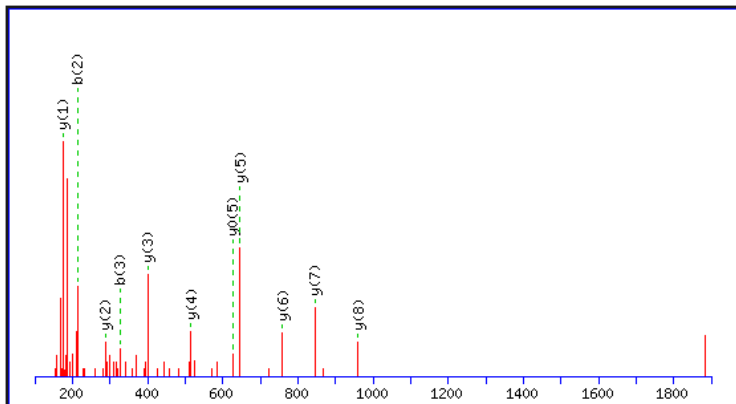

| #         | <b>b</b>      | <b>b<sup>++</sup></b> | <b>b<sup>*</sup></b> | <b>b<sup>+++</sup></b> | <b>b<sup>0</sup></b> | <b>b<sup>0++</sup></b> | Seq.     | <b>y</b>      | <b>y<sup>++</sup></b> | <b>y<sup>*</sup></b> | <b>y<sup>+++</sup></b> | <b>y<sup>0</sup></b> | <b>y<sup>0++</sup></b> | #         |
|-----------|---------------|-----------------------|----------------------|------------------------|----------------------|------------------------|----------|---------------|-----------------------|----------------------|------------------------|----------------------|------------------------|-----------|
| <b>1</b>  | 116.03        | 58.52                 |                      |                        | 98.02                | 49.52                  | <b>D</b> |               |                       |                      |                        |                      |                        | <b>10</b> |
| <b>2</b>  | <b>213.09</b> | 107.05                |                      |                        | 195.08               | 98.04                  | <b>P</b> | 1056.57       | 528.79                | 1039.54              | 520.27                 | 1038.56              | 519.78                 | <b>9</b>  |
| <b>3</b>  | <b>327.13</b> | 164.07                | 310.10               | 155.56                 | 309.12               | 155.06                 | <b>N</b> | <b>959.52</b> | 480.26                | 942.49               | 471.75                 | 941.51               | 471.26                 | <b>8</b>  |
| <b>4</b>  | 414.16        | 207.58                | 397.14               | 199.07                 | 396.15               | 198.58                 | <b>S</b> | <b>845.47</b> | 423.24                | 828.45               | 414.73                 | 827.46               | 414.23                 | <b>7</b>  |
| <b>5</b>  | 527.25        | 264.13                | 510.22               | 255.61                 | 509.24               | 255.12                 | <b>L</b> | <b>758.44</b> | 379.72                | 741.41               | 371.21                 | 740.43               | 370.72                 | <b>6</b>  |
| <b>6</b>  | 656.29        | 328.65                | 639.26               | 320.13                 | 638.28               | 319.64                 | <b>E</b> | <b>645.36</b> | 323.18                | 628.33               | 314.67                 | <b>627.35</b>        | 314.18                 | <b>5</b>  |
| <b>7</b>  | 771.32        | 386.16                | 754.29               | 377.65                 | 753.30               | 377.16                 | <b>D</b> | <b>516.31</b> | 258.66                | 499.29               | 250.15                 | 498.30               | 249.66                 | <b>4</b>  |
| <b>8</b>  | 884.40        | 442.70                | 867.37               | 434.19                 | 866.39               | 433.70                 | <b>I</b> | <b>401.29</b> | 201.15                | 384.26               | 192.63                 |                      |                        | <b>3</b>  |
| <b>9</b>  | 997.48        | 499.25                | 980.46               | 490.73                 | 979.47               | 490.24                 | <b>L</b> | <b>288.20</b> | 144.61                | 271.18               | 136.09                 |                      |                        | <b>2</b>  |
| <b>10</b> |               |                       |                      |                        |                      |                        | <b>R</b> | <b>175.12</b> | 88.06                 | 158.09               | 79.55                  |                      |                        | <b>1</b>  |

MS/MS Fragmentation of ID345 **MVSSLMIR**

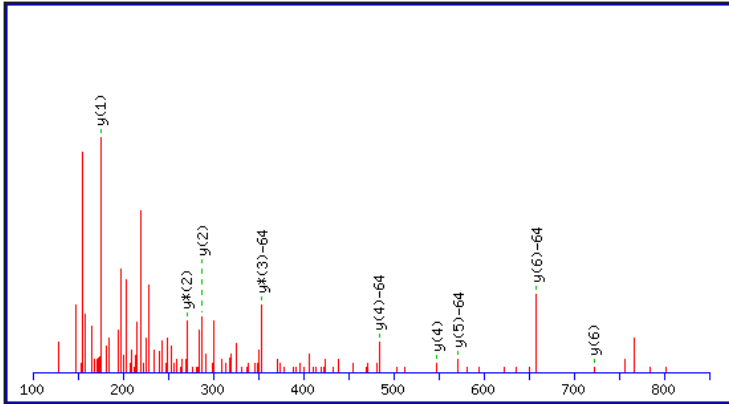

| #        | <b>b</b> | <b>b<sup>++</sup></b> | <b>b<sup>0</sup></b> | <b>b<sup>0++</sup></b> | Seq.     | <b>y</b>      | <b>y<sup>++</sup></b> | <b>y<sup>*</sup></b> | <b>y<sup>+++</sup></b> | <b>y<sup>0</sup></b> | <b>y<sup>0++</sup></b> | #        |
|----------|----------|-----------------------|----------------------|------------------------|----------|---------------|-----------------------|----------------------|------------------------|----------------------|------------------------|----------|
| <b>1</b> | 84.04    | 42.53                 |                      |                        | <b>M</b> |               |                       |                      |                        |                      |                        | <b>8</b> |
| <b>2</b> | 183.11   | 92.06                 |                      |                        | <b>V</b> | 757.46        | 379.23                | 740.43               | 370.72                 | 739.45               | 370.23                 | <b>7</b> |
| <b>3</b> | 270.14   | 135.58                | 252.13               | 126.57                 | <b>S</b> | <b>658.39</b> | 329.70                | 641.36               | 321.18                 | 640.38               | 320.69                 | <b>6</b> |
| <b>4</b> | 357.18   | 179.09                | 339.17               | 170.09                 | <b>S</b> | <b>571.36</b> | 286.18                | 554.33               | 277.67                 | 553.35               | 277.18                 | <b>5</b> |
| <b>5</b> | 470.26   | 235.63                | 452.25               | 226.63                 | <b>L</b> | <b>484.32</b> | 242.67                | 467.30               | 234.15                 |                      |                        | <b>4</b> |
| <b>6</b> | 553.30   | 277.15                | 535.29               | 268.15                 | <b>M</b> | 371.24        | 186.12                | <b>354.21</b>        | 177.61                 |                      |                        | <b>3</b> |
| <b>7</b> | 666.38   | 333.69                | 648.37               | 324.69                 | <b>I</b> | <b>288.20</b> | 144.61                | <b>271.18</b>        | 136.09                 |                      |                        | <b>2</b> |
| <b>8</b> |          |                       |                      |                        | <b>R</b> | <b>175.12</b> | 88.06                 | 158.09               | 79.55                  |                      |                        | <b>1</b> |

MS/MS Fragmentation of ID347 **EAL**ESVTAEQR

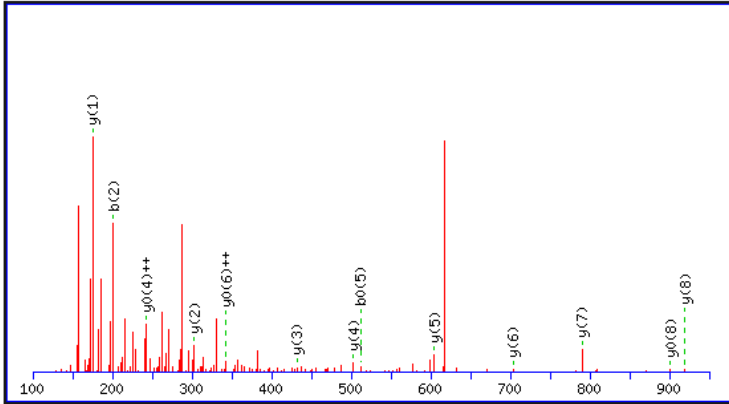

| #         | <b>b</b>      | <b>b<sup>++</sup></b> | <b>b<sup>*</sup></b> | <b>b<sup>*++</sup></b> | <b>b<sup>0</sup></b> | <b>b<sup>0++</sup></b> | Seq.     | <b>y</b>      | <b>y<sup>++</sup></b> | <b>y<sup>*</sup></b> | <b>y<sup>*++</sup></b> | <b>y<sup>0</sup></b> | <b>y<sup>0++</sup></b> | #         |
|-----------|---------------|-----------------------|----------------------|------------------------|----------------------|------------------------|----------|---------------|-----------------------|----------------------|------------------------|----------------------|------------------------|-----------|
| <b>1</b>  | 130.05        | 65.53                 |                      |                        | 112.04               | 56.52                  | <b>E</b> |               |                       |                      |                        |                      |                        | <b>11</b> |
| <b>2</b>  | <b>201.09</b> | 101.05                |                      |                        | 183.08               | 92.04                  | <b>A</b> | 1103.57       | 552.29                | 1086.54              | 543.77                 | 1085.56              | 543.28                 | <b>10</b> |
| <b>3</b>  | 314.17        | 157.59                |                      |                        | 296.16               | 148.58                 | <b>L</b> | 1032.53       | 516.77                | 1015.51              | 508.26                 | 1014.52              | 507.76                 | <b>9</b>  |
| <b>4</b>  | 443.21        | 222.11                |                      |                        | 425.20               | 213.11                 | <b>E</b> | <b>919.45</b> | 460.23                | 902.42               | 451.71                 | <b>901.44</b>        | 451.22                 | <b>8</b>  |
| <b>5</b>  | 530.25        | 265.63                |                      |                        | <b>512.24</b>        | 256.62                 | <b>S</b> | <b>790.41</b> | 395.71                | 773.38               | 387.19                 | 772.39               | 386.70                 | <b>7</b>  |
| <b>6</b>  | 629.31        | 315.16                |                      |                        | 611.30               | 306.16                 | <b>V</b> | <b>703.37</b> | 352.19                | 686.35               | 343.68                 | 685.36               | <b>343.19</b>          | <b>6</b>  |
| <b>7</b>  | 730.36        | 365.68                |                      |                        | 712.35               | 356.68                 | <b>T</b> | <b>604.30</b> | 302.66                | 587.28               | 294.14                 | 586.29               | 293.65                 | <b>5</b>  |
| <b>8</b>  | 801.40        | 401.20                |                      |                        | 783.39               | 392.20                 | <b>A</b> | <b>503.26</b> | 252.13                | 486.23               | 243.62                 | 485.25               | <b>243.13</b>          | <b>4</b>  |
| <b>9</b>  | 930.44        | 465.72                |                      |                        | 912.43               | 456.72                 | <b>E</b> | <b>432.22</b> | 216.61                | 415.19               | 208.10                 | 414.21               | 207.61                 | <b>3</b>  |
| <b>10</b> | 1058.50       | 529.75                | 1041.47              | 521.24                 | 1040.49              | 520.75                 | <b>Q</b> | <b>303.18</b> | 152.09                | 286.15               | 143.58                 |                      |                        | <b>2</b>  |
| <b>11</b> |               |                       |                      |                        |                      |                        | <b>R</b> | <b>175.12</b> | 88.06                 | 158.09               | 79.55                  |                      |                        | <b>1</b>  |

MS/MS Fragmentation of ID348 **IMAHPATVVYPR**

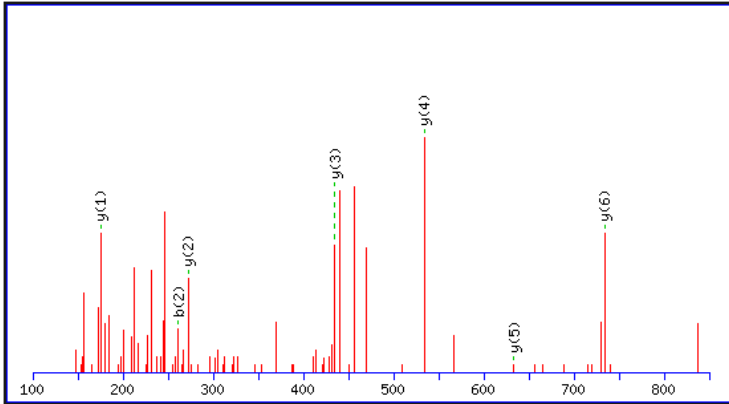

| #         | <b>b</b>      | <b>b<sup>++</sup></b> | <b>b<sup>0</sup></b> | <b>b<sup>0++</sup></b> | Seq.     | <b>y</b>      | <b>y<sup>++</sup></b> | <b>y<sup>*</sup></b> | <b>y<sup>*++</sup></b> | <b>y<sup>0</sup></b> | <b>y<sup>0++</sup></b> | #         |
|-----------|---------------|-----------------------|----------------------|------------------------|----------|---------------|-----------------------|----------------------|------------------------|----------------------|------------------------|-----------|
| <b>1</b>  | 114.09        | 57.55                 |                      |                        | <b>I</b> |               |                       |                      |                        |                      |                        | <b>12</b> |
| <b>2</b>  | <b>261.13</b> | 131.07                |                      |                        | <b>M</b> | 1257.64       | 629.32                | 1240.61              | 620.81                 | 1239.63              | 620.32                 | <b>11</b> |
| <b>3</b>  | 332.16        | 166.59                |                      |                        | <b>A</b> | 1110.61       | 555.81                | 1093.58              | 547.29                 | 1092.59              | 546.80                 | <b>10</b> |
| <b>4</b>  | 469.22        | 235.12                |                      |                        | <b>H</b> | 1039.57       | 520.29                | 1022.54              | 511.77                 | 1021.56              | 511.28                 | <b>9</b>  |
| <b>5</b>  | 566.28        | 283.64                |                      |                        | <b>P</b> | 902.51        | 451.76                | 885.48               | 443.25                 | 884.50               | 442.75                 | <b>8</b>  |
| <b>6</b>  | 637.31        | 319.16                |                      |                        | <b>A</b> | 805.46        | 403.23                | 788.43               | 394.72                 | 787.45               | 394.23                 | <b>7</b>  |
| <b>7</b>  | 738.36        | 369.68                | 720.35               | 360.68                 | <b>T</b> | <b>734.42</b> | 367.71                | 717.39               | 359.20                 | 716.41               | 358.71                 | <b>6</b>  |
| <b>8</b>  | 837.43        | 419.22                | 819.42               | 410.21                 | <b>V</b> | <b>633.37</b> | 317.19                | 616.35               | 308.68                 |                      |                        | <b>5</b>  |
| <b>9</b>  | 936.50        | 468.75                | 918.49               | 459.75                 | <b>V</b> | <b>534.30</b> | 267.66                | 517.28               | 259.14                 |                      |                        | <b>4</b>  |
| <b>10</b> | 1099.56       | 550.28                | 1081.55              | 541.28                 | <b>Y</b> | <b>435.24</b> | 218.12                | 418.21               | 209.61                 |                      |                        | <b>3</b>  |
| <b>11</b> | 1196.61       | 598.81                | 1178.60              | 589.80                 | <b>P</b> | <b>272.17</b> | 136.59                | 255.15               | 128.08                 |                      |                        | <b>2</b>  |
| <b>12</b> |               |                       |                      |                        | <b>R</b> | <b>175.12</b> | 88.06                 | 158.09               | 79.55                  |                      |                        | <b>1</b>  |

MS/MS Fragmentation of ID349 **AWEVAQAPFK**

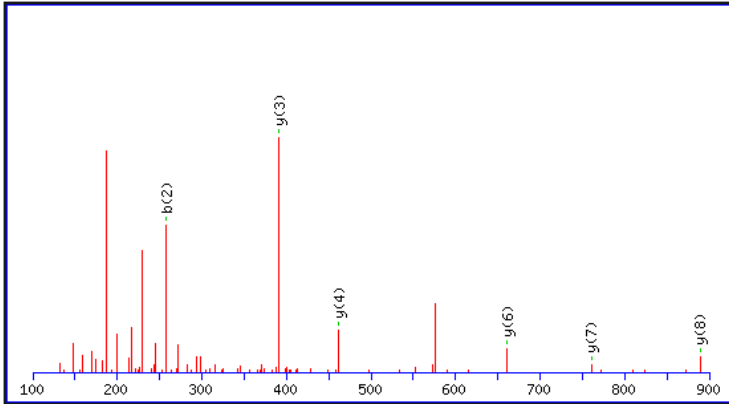

| #         | <b>b</b>      | <b>b<sup>++</sup></b> | <b>b<sup>*</sup></b> | <b>b<sup>*++</sup></b> | <b>b<sup>0</sup></b> | <b>b<sup>0++</sup></b> | Seq.     | <b>y</b>      | <b>y<sup>++</sup></b> | <b>y<sup>*</sup></b> | <b>y<sup>*++</sup></b> | <b>y<sup>0</sup></b> | <b>y<sup>0++</sup></b> | #         |
|-----------|---------------|-----------------------|----------------------|------------------------|----------------------|------------------------|----------|---------------|-----------------------|----------------------|------------------------|----------------------|------------------------|-----------|
| <b>1</b>  | 72.04         | 36.53                 |                      |                        |                      |                        | <b>A</b> |               |                       |                      |                        |                      |                        | <b>10</b> |
| <b>2</b>  | <b>258.12</b> | 129.57                |                      |                        |                      |                        | <b>W</b> | 1075.56       | 538.28                | 1058.53              | 529.77                 | 1057.55              | 529.28                 | <b>9</b>  |
| <b>3</b>  | 387.17        | 194.09                |                      |                        | 369.16               | 185.08                 | <b>E</b> | <b>889.48</b> | 445.24                | 872.45               | 436.73                 | 871.47               | 436.24                 | <b>8</b>  |
| <b>4</b>  | 486.23        | 243.62                |                      |                        | 468.22               | 234.62                 | <b>V</b> | <b>760.44</b> | 380.72                | 743.41               | 372.21                 |                      |                        | <b>7</b>  |
| <b>5</b>  | 557.27        | 279.14                |                      |                        | 539.26               | 270.13                 | <b>A</b> | <b>661.37</b> | 331.19                | 644.34               | 322.67                 |                      |                        | <b>6</b>  |
| <b>6</b>  | 685.33        | 343.17                | 668.30               | 334.66                 | 667.32               | 334.16                 | <b>Q</b> | 590.33        | 295.67                | 573.30               | 287.16                 |                      |                        | <b>5</b>  |
| <b>7</b>  | 756.37        | 378.69                | 739.34               | 370.17                 | 738.36               | 369.68                 | <b>A</b> | <b>462.27</b> | 231.64                | 445.24               | 223.13                 |                      |                        | <b>4</b>  |
| <b>8</b>  | 853.42        | 427.21                | 836.39               | 418.70                 | 835.41               | 418.21                 | <b>P</b> | <b>391.23</b> | 196.12                | 374.21               | 187.61                 |                      |                        | <b>3</b>  |
| <b>9</b>  | 1000.49       | 500.75                | 983.46               | 492.23                 | 982.48               | 491.74                 | <b>F</b> | 294.18        | 147.59                | 277.15               | 139.08                 |                      |                        | <b>2</b>  |
| <b>10</b> |               |                       |                      |                        |                      |                        | <b>K</b> | 147.11        | 74.06                 | 130.09               | 65.55                  |                      |                        | <b>1</b>  |

MS/MS Fragmentation of ID350 **LLADDLFLTK**

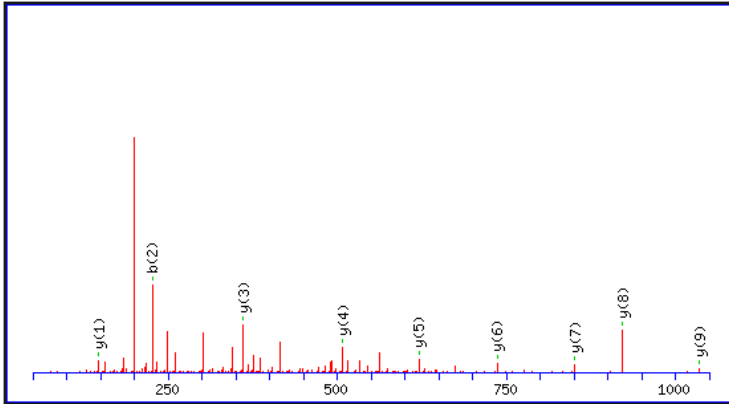

| #         | <b>b</b>      | <b>b<sup>++</sup></b> | <b>b<sup>0</sup></b> | <b>b<sup>0++</sup></b> | Seq.     | <b>y</b>       | <b>y<sup>++</sup></b> | <b>y<sup>*</sup></b> | <b>y<sup>*++</sup></b> | <b>y<sup>0</sup></b> | <b>y<sup>0++</sup></b> | #         |
|-----------|---------------|-----------------------|----------------------|------------------------|----------|----------------|-----------------------|----------------------|------------------------|----------------------|------------------------|-----------|
| <b>1</b>  | 114.09        | 57.55                 |                      |                        | <b>L</b> |                |                       |                      |                        |                      |                        | <b>10</b> |
| <b>2</b>  | <b>227.18</b> | 114.09                |                      |                        | <b>L</b> | <b>1035.57</b> | 518.29                | 1018.55              | 509.78                 | 1017.56              | 509.28                 | <b>9</b>  |
| <b>3</b>  | 298.21        | 149.61                |                      |                        | <b>A</b> | <b>922.49</b>  | 461.75                | 905.46               | 453.23                 | 904.48               | 452.74                 | <b>8</b>  |
| <b>4</b>  | 413.24        | 207.12                | 395.23               | 198.12                 | <b>D</b> | <b>851.45</b>  | 426.23                | 834.42               | 417.72                 | 833.44               | 417.22                 | <b>7</b>  |
| <b>5</b>  | 528.27        | 264.64                | 510.26               | 255.63                 | <b>D</b> | <b>736.42</b>  | 368.72                | 719.40               | 360.20                 | 718.41               | 359.71                 | <b>6</b>  |
| <b>6</b>  | 641.35        | 321.18                | 623.34               | 312.17                 | <b>L</b> | <b>621.40</b>  | 311.20                | 604.37               | 302.69                 | 603.39               | 302.20                 | <b>5</b>  |
| <b>7</b>  | 788.42        | 394.71                | 770.41               | 385.71                 | <b>F</b> | <b>508.31</b>  | 254.66                | 491.29               | 246.15                 | 490.30               | 245.65                 | <b>4</b>  |
| <b>8</b>  | 901.50        | 451.26                | 883.49               | 442.25                 | <b>L</b> | <b>361.24</b>  | 181.13                | 344.22               | 172.61                 | 343.23               | 172.12                 | <b>3</b>  |
| <b>9</b>  | 1002.55       | 501.78                | 984.54               | 492.77                 | <b>T</b> | 248.16         | 124.58                | 231.13               | 116.07                 | 230.15               | 115.58                 | <b>2</b>  |
| <b>10</b> |               |                       |                      |                        | <b>K</b> | <b>147.11</b>  | 74.06                 | 130.09               | 65.55                  |                      |                        | <b>1</b>  |



MS/MS Fragmentation of ID355 **TLFLDIPALTK**

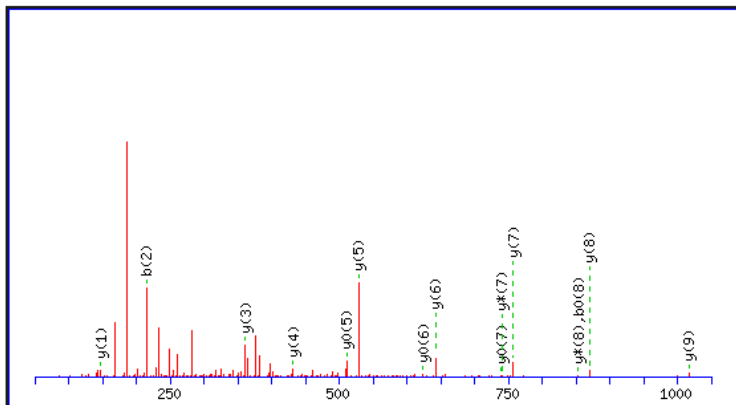

| #         | <b>b</b>      | <b>b<sup>++</sup></b> | <b>b<sup>0</sup></b> | <b>b<sup>0++</sup></b> | Seq.     | <b>y</b>       | <b>y<sup>++</sup></b> | <b>y<sup>*</sup></b> | <b>y<sup>*++</sup></b> | <b>y<sup>0</sup></b> | <b>y<sup>0++</sup></b> | #         |
|-----------|---------------|-----------------------|----------------------|------------------------|----------|----------------|-----------------------|----------------------|------------------------|----------------------|------------------------|-----------|
| <b>1</b>  | 102.05        | 51.53                 | 84.04                | 42.53                  | <b>T</b> |                |                       |                      |                        |                      |                        | <b>11</b> |
| <b>2</b>  | <b>215.14</b> | 108.07                | 197.13               | 99.07                  | <b>L</b> | 1130.68        | 565.84                | 1113.66              | 557.33                 | 1112.67              | 556.84                 | <b>10</b> |
| <b>3</b>  | 362.21        | 181.61                | 344.20               | 172.60                 | <b>F</b> | <b>1017.60</b> | 509.30                | 1000.57              | 500.79                 | 999.59               | 500.30                 | <b>9</b>  |
| <b>4</b>  | 475.29        | 238.15                | 457.28               | 229.14                 | <b>L</b> | <b>870.53</b>  | 435.77                | <b>853.50</b>        | 427.26                 | 852.52               | 426.76                 | <b>8</b>  |
| <b>5</b>  | 590.32        | 295.66                | 572.31               | 286.66                 | <b>D</b> | <b>757.45</b>  | 379.23                | <b>740.42</b>        | 370.71                 | <b>739.43</b>        | 370.22                 | <b>7</b>  |
| <b>6</b>  | 703.40        | 352.20                | 685.39               | 343.20                 | <b>I</b> | <b>642.42</b>  | 321.71                | 625.39               | 313.20                 | <b>624.41</b>        | 312.71                 | <b>6</b>  |
| <b>7</b>  | 800.46        | 400.73                | 782.44               | 391.73                 | <b>P</b> | <b>529.33</b>  | 265.17                | 512.31               | 256.66                 | <b>511.32</b>        | 256.17                 | <b>5</b>  |
| <b>8</b>  | 871.49        | 436.25                | <b>853.48</b>        | 427.24                 | <b>A</b> | <b>432.28</b>  | 216.64                | 415.26               | 208.13                 | 414.27               | 207.64                 | <b>4</b>  |
| <b>9</b>  | 984.58        | 492.79                | 966.57               | 483.79                 | <b>L</b> | <b>361.24</b>  | 181.13                | 344.22               | 172.61                 | 343.23               | 172.12                 | <b>3</b>  |
| <b>10</b> | 1085.62       | 543.32                | 1067.61              | 534.31                 | <b>T</b> | 248.16         | 124.58                | 231.13               | 116.07                 | 230.15               | 115.58                 | <b>2</b>  |
| <b>11</b> |               |                       |                      |                        | <b>K</b> | <b>147.11</b>  | 74.06                 | 130.09               | 65.55                  |                      |                        | <b>1</b>  |

MS/MS Fragmentation of ID356 **LTEAENLIGVLR**

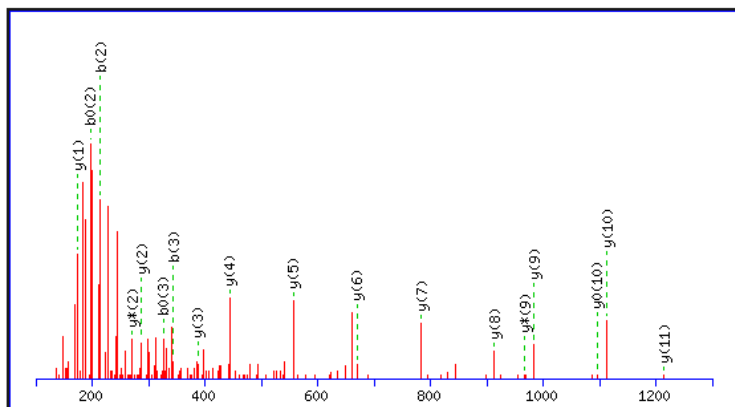

| #         | b             | b <sup>++</sup> | b*      | b <sup>*++</sup> | b <sup>0</sup> | b <sup>0++</sup> | Seq.     | y              | y <sup>++</sup> | y*            | y <sup>*++</sup> | y <sup>0</sup> | y <sup>0++</sup> | #         |
|-----------|---------------|-----------------|---------|------------------|----------------|------------------|----------|----------------|-----------------|---------------|------------------|----------------|------------------|-----------|
| <b>1</b>  | 114.09        | 57.55           |         |                  |                |                  | <b>L</b> |                |                 |               |                  |                |                  | <b>12</b> |
| <b>2</b>  | <b>215.14</b> | 108.07          |         |                  | <b>197.13</b>  | 99.07            | <b>T</b> | <b>1214.67</b> | 607.84          | 1197.65       | 599.33           | 1196.66        | 598.84           | <b>11</b> |
| <b>3</b>  | <b>344.18</b> | 172.59          |         |                  | <b>326.17</b>  | 163.59           | <b>E</b> | <b>1113.63</b> | 557.32          | 1096.60       | 548.80           | <b>1095.62</b> | 548.31           | <b>10</b> |
| <b>4</b>  | 415.22        | 208.11          |         |                  | 397.21         | 199.11           | <b>A</b> | <b>984.58</b>  | 492.80          | <b>967.56</b> | 484.28           | 966.57         | 483.79           | <b>9</b>  |
| <b>5</b>  | 544.26        | 272.63          |         |                  | 526.25         | 263.63           | <b>E</b> | <b>913.55</b>  | 457.28          | 896.52        | 448.76           | 895.54         | 448.27           | <b>8</b>  |
| <b>6</b>  | 658.30        | 329.66          | 641.28  | 321.14           | 640.29         | 320.65           | <b>N</b> | <b>784.50</b>  | 392.76          | 767.48        | 384.24           |                |                  | <b>7</b>  |
| <b>7</b>  | 771.39        | 386.20          | 754.36  | 377.68           | 753.38         | 377.19           | <b>L</b> | <b>670.46</b>  | 335.73          | 653.43        | 327.22           |                |                  | <b>6</b>  |
| <b>8</b>  | 884.47        | 442.74          | 867.45  | 434.23           | 866.46         | 433.73           | <b>I</b> | <b>557.38</b>  | 279.19          | 540.35        | 270.68           |                |                  | <b>5</b>  |
| <b>9</b>  | 941.49        | 471.25          | 924.47  | 462.74           | 923.48         | 462.25           | <b>G</b> | <b>444.29</b>  | 222.65          | 427.27        | 214.14           |                |                  | <b>4</b>  |
| <b>10</b> | 1040.56       | 520.78          | 1023.54 | 512.27           | 1022.55        | 511.78           | <b>V</b> | <b>387.27</b>  | 194.14          | 370.24        | 185.63           |                |                  | <b>3</b>  |
| <b>11</b> | 1153.65       | 577.33          | 1136.62 | 568.81           | 1135.64        | 568.32           | <b>L</b> | <b>288.20</b>  | 144.61          | <b>271.18</b> | 136.09           |                |                  | <b>2</b>  |
| <b>12</b> |               |                 |         |                  |                |                  | <b>R</b> | <b>175.12</b>  | 88.06           | 158.09        | 79.55            |                |                  | <b>1</b>  |

MS/MS Fragmentation of ID357 **YTTDQISIIFGDAFGNQVYDSK**

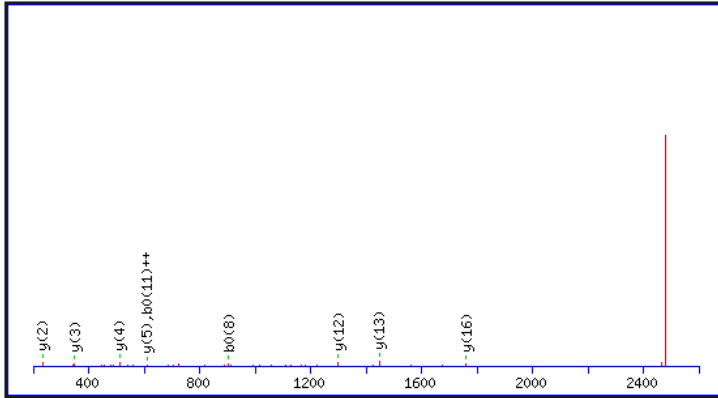

| #         | b       | b <sup>++</sup> | b*      | b <sup>*++</sup> | b <sup>0</sup> | b <sup>0++</sup> | Seq.     | y              | y <sup>++</sup> | y*      | y <sup>*++</sup> | y <sup>0</sup> | y <sup>0++</sup> | #         |
|-----------|---------|-----------------|---------|------------------|----------------|------------------|----------|----------------|-----------------|---------|------------------|----------------|------------------|-----------|
| <b>1</b>  | 164.07  | 82.54           |         |                  |                |                  | <b>Y</b> |                |                 |         |                  |                |                  | <b>22</b> |
| <b>2</b>  | 265.12  | 133.06          |         |                  | 247.11         | 124.06           | <b>T</b> | 2319.11        | 1160.06         | 2302.09 | 1151.55          | 2301.10        | 1151.06          | <b>21</b> |
| <b>3</b>  | 366.17  | 183.59          |         |                  | 348.16         | 174.58           | <b>T</b> | 2218.07        | 1109.54         | 2201.04 | 1101.02          | 2200.06        | 1100.53          | <b>20</b> |
| <b>4</b>  | 481.19  | 241.10          |         |                  | 463.18         | 232.09           | <b>D</b> | 2117.02        | 1059.01         | 2099.99 | 1050.50          | 2099.01        | 1050.01          | <b>19</b> |
| <b>5</b>  | 609.25  | 305.13          | 592.22  | 296.62           | 591.24         | 296.12           | <b>Q</b> | 2001.99        | 1001.50         | 1984.97 | 992.99           | 1983.98        | 992.49           | <b>18</b> |
| <b>6</b>  | 722.34  | 361.67          | 705.31  | 353.16           | 704.32         | 352.67           | <b>I</b> | 1873.93        | 937.47          | 1856.91 | 928.96           | 1855.92        | 928.46           | <b>17</b> |
| <b>7</b>  | 809.37  | 405.19          | 792.34  | 396.67           | 791.36         | 396.18           | <b>S</b> | <b>1760.85</b> | 880.93          | 1743.82 | 872.41           | 1742.84        | 871.92           | <b>16</b> |
| <b>8</b>  | 922.45  | 461.73          | 905.43  | 453.22           | <b>904.44</b>  | 452.72           | <b>I</b> | 1673.82        | 837.41          | 1656.79 | 828.90           | 1655.81        | 828.41           | <b>15</b> |
| <b>9</b>  | 1035.54 | 518.27          | 1018.51 | 509.76           | 1017.53        | 509.27           | <b>I</b> | 1560.73        | 780.87          | 1543.71 | 772.36           | 1542.72        | 771.86           | <b>14</b> |
| <b>10</b> | 1182.60 | 591.81          | 1165.58 | 583.29           | 1164.59        | 582.80           | <b>F</b> | <b>1447.65</b> | 724.33          | 1430.62 | 715.81           | 1429.64        | 715.32           | <b>13</b> |
| <b>11</b> | 1239.63 | 620.32          | 1222.60 | 611.80           | 1221.62        | <b>611.31</b>    | <b>G</b> | <b>1300.58</b> | 650.79          | 1283.55 | 642.28           | 1282.57        | 641.79           | <b>12</b> |
| <b>12</b> | 1354.65 | 677.83          | 1337.63 | 669.32           | 1336.64        | 668.82           | <b>D</b> | 1243.56        | 622.28          | 1226.53 | 613.77           | 1225.55        | 613.28           | <b>11</b> |
| <b>13</b> | 1425.69 | 713.35          | 1408.66 | 704.84           | 1407.68        | 704.34           | <b>A</b> | 1128.53        | 564.77          | 1111.51 | 556.26           | 1110.52        | 555.76           | <b>10</b> |
| <b>14</b> | 1572.76 | 786.88          | 1555.73 | 778.37           | 1554.75        | 777.88           | <b>F</b> | 1057.49        | 529.25          | 1040.47 | 520.74           | 1039.48        | 520.25           | <b>9</b>  |
| <b>15</b> | 1629.78 | 815.39          | 1612.75 | 806.88           | 1611.77        | 806.39           | <b>G</b> | 910.43         | 455.72          | 893.40  | 447.20           | 892.42         | 446.71           | <b>8</b>  |
| <b>16</b> | 1743.82 | 872.41          | 1726.80 | 863.90           | 1725.81        | 863.41           | <b>N</b> | 853.41         | 427.21          | 836.38  | 418.69           | 835.39         | 418.20           | <b>7</b>  |
| <b>17</b> | 1871.88 | 936.44          | 1854.85 | 927.93           | 1853.87        | 927.44           | <b>Q</b> | 739.36         | 370.18          | 722.34  | 361.67           | 721.35         | 361.18           | <b>6</b>  |
| <b>18</b> | 1970.95 | 985.98          | 1953.92 | 977.47           | 1952.94        | 976.97           | <b>V</b> | <b>611.30</b>  | 306.16          | 594.28  | 297.64           | 593.29         | 297.15           | <b>5</b>  |
| <b>19</b> | 2134.01 | 1067.51         | 2116.99 | 1059.00          | 2116.00        | 1058.50          | <b>Y</b> | <b>512.24</b>  | 256.62          | 495.21  | 248.11           | 494.22         | 247.62           | <b>4</b>  |
| <b>20</b> | 2249.04 | 1125.02         | 2232.01 | 1116.51          | 2231.03        | 1116.02          | <b>D</b> | <b>349.17</b>  | 175.09          | 332.15  | 166.58           | 331.16         | 166.08           | <b>3</b>  |
| <b>21</b> | 2336.07 | 1168.54         | 2319.05 | 1160.03          | 2318.06        | 1159.53          | <b>S</b> | <b>234.14</b>  | 117.58          | 217.12  | 109.06           | 216.13         | 108.57           | <b>2</b>  |
| <b>22</b> |         |                 |         |                  |                |                  | <b>K</b> | 147.11         | 74.06           | 130.09  | 65.55            |                |                  | <b>1</b>  |

MS/MS Fragmentation of ID358 **LDDPSTGTFFER**

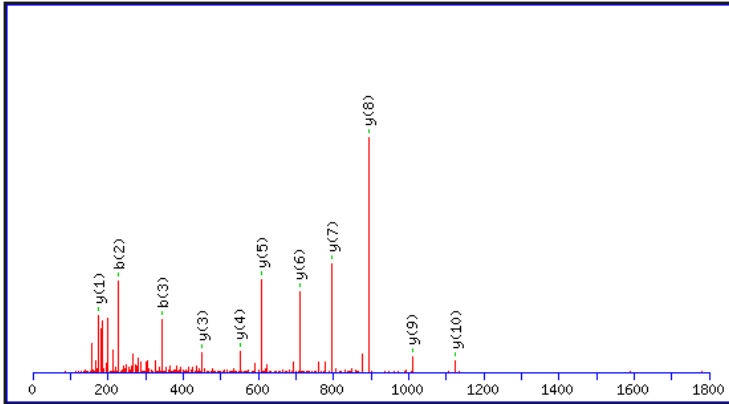

| #         | <b>b</b>      | <b>b<sup>++</sup></b> | <b>b<sup>0</sup></b> | <b>b<sup>0++</sup></b> | Seq.     | <b>y</b>       | <b>y<sup>++</sup></b> | <b>y<sup>*</sup></b> | <b>y<sup>*++</sup></b> | <b>y<sup>0</sup></b> | <b>y<sup>0++</sup></b> | #         |
|-----------|---------------|-----------------------|----------------------|------------------------|----------|----------------|-----------------------|----------------------|------------------------|----------------------|------------------------|-----------|
| <b>1</b>  | 114.09        | 57.55                 |                      |                        | <b>L</b> |                |                       |                      |                        |                      |                        | <b>11</b> |
| <b>2</b>  | <b>229.12</b> | 115.06                | 211.11               | 106.06                 | <b>D</b> | <b>1124.49</b> | 562.75                | 1107.46              | 554.23                 | 1106.47              | 553.74                 | <b>10</b> |
| <b>3</b>  | <b>344.15</b> | 172.58                | 326.13               | 163.57                 | <b>D</b> | <b>1009.46</b> | 505.23                | 992.43               | 496.72                 | 991.45               | 496.23                 | <b>9</b>  |
| <b>4</b>  | 441.20        | 221.10                | 423.19               | 212.10                 | <b>P</b> | <b>894.43</b>  | 447.72                | 877.41               | 439.21                 | 876.42               | 438.71                 | <b>8</b>  |
| <b>5</b>  | 528.23        | 264.62                | 510.22               | 255.61                 | <b>S</b> | <b>797.38</b>  | 399.19                | 780.35               | 390.68                 | 779.37               | 390.19                 | <b>7</b>  |
| <b>6</b>  | 629.28        | 315.14                | 611.27               | 306.14                 | <b>T</b> | <b>710.35</b>  | 355.68                | 693.32               | 347.16                 | 692.34               | 346.67                 | <b>6</b>  |
| <b>7</b>  | 686.30        | 343.65                | 668.29               | 334.65                 | <b>G</b> | <b>609.30</b>  | 305.15                | 592.27               | 296.64                 | 591.29               | 296.15                 | <b>5</b>  |
| <b>8</b>  | 787.35        | 394.18                | 769.34               | 385.17                 | <b>T</b> | <b>552.28</b>  | 276.64                | 535.25               | 268.13                 | 534.27               | 267.64                 | <b>4</b>  |
| <b>9</b>  | 934.42        | 467.71                | 916.40               | 458.71                 | <b>F</b> | <b>451.23</b>  | 226.12                | 434.20               | 217.61                 | 433.22               | 217.11                 | <b>3</b>  |
| <b>10</b> | 1063.46       | 532.23                | 1045.45              | 523.23                 | <b>E</b> | 304.16         | 152.58                | 287.13               | 144.07                 | 286.15               | 143.58                 | <b>2</b>  |
| <b>11</b> |               |                       |                      |                        | <b>R</b> | <b>175.12</b>  | 88.06                 | 158.09               | 79.55                  |                      |                        | <b>1</b>  |

MS/MS Fragmentation of ID359 **D**TLLYSNVK**L**D

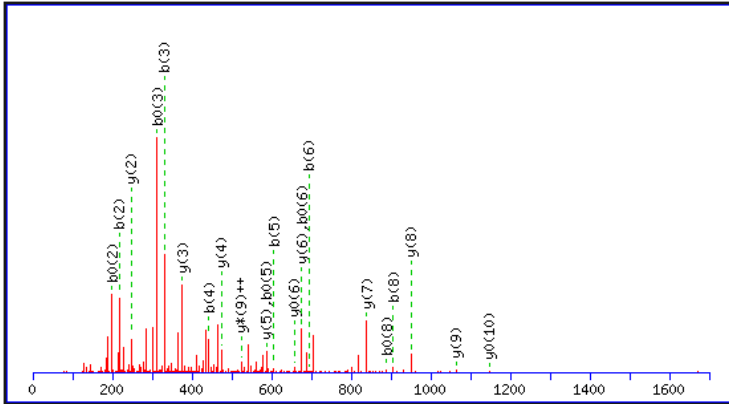

| #  | b              | b <sup>++</sup> | b <sup>*</sup> | b <sup>*++</sup> | b <sup>0</sup> | b <sup>0++</sup> | Seq.     | y              | y <sup>++</sup> | y <sup>*</sup> | y <sup>*++</sup> | y <sup>0</sup> | y <sup>0++</sup> | #         |
|----|----------------|-----------------|----------------|------------------|----------------|------------------|----------|----------------|-----------------|----------------|------------------|----------------|------------------|-----------|
| 1  | 116.03         | 58.52           |                |                  | 98.02          | 49.52            | <b>D</b> |                |                 |                |                  |                |                  | <b>11</b> |
| 2  | <b>217.08</b>  | 109.04          |                |                  | <b>199.07</b>  | 100.04           | <b>T</b> | 1165.65        | 583.33          | 1148.62        | 574.81           | <b>1147.64</b> | 574.32           | <b>10</b> |
| 3  | <b>330.17</b>  | 165.59          |                |                  | <b>312.16</b>  | 156.58           | <b>L</b> | <b>1064.60</b> | 532.80          | 1047.57        | <b>524.29</b>    | 1046.59        | 523.80           | <b>9</b>  |
| 4  | <b>443.25</b>  | 222.13          |                |                  | 425.24         | 213.12           | <b>L</b> | <b>951.51</b>  | 476.26          | 934.49         | 467.75           | 933.50         | 467.26           | <b>8</b>  |
| 5  | <b>606.31</b>  | 303.66          |                |                  | <b>588.30</b>  | 294.66           | <b>Y</b> | <b>838.43</b>  | 419.72          | 821.40         | 411.21           | 820.42         | 410.71           | <b>7</b>  |
| 6  | <b>693.35</b>  | 347.18          |                |                  | <b>675.33</b>  | 338.17           | <b>S</b> | <b>675.37</b>  | 338.19          | 658.34         | 329.67           | <b>657.36</b>  | 329.18           | <b>6</b>  |
| 7  | 807.39         | 404.20          | 790.36         | 395.68           | 789.38         | 395.19           | <b>N</b> | <b>588.34</b>  | 294.67          | 571.31         | 286.16           | 570.32         | 285.67           | <b>5</b>  |
| 8  | <b>906.46</b>  | 453.73          | 889.43         | 445.22           | <b>888.45</b>  | 444.73           | <b>V</b> | <b>474.29</b>  | 237.65          | 457.27         | 229.14           | 456.28         | 228.64           | <b>4</b>  |
| 9  | 1034.55        | 517.78          | 1017.53        | 509.27           | 1016.54        | 508.77           | <b>K</b> | <b>375.22</b>  | 188.12          | 358.20         | 179.60           | 357.21         | 179.11           | <b>3</b>  |
| 10 | <b>1147.64</b> | 574.32          | 1130.61        | 565.81           | 1129.63        | 565.32           | <b>L</b> | <b>247.13</b>  | 124.07          |                |                  | 229.12         | 115.06           | <b>2</b>  |
| 11 |                |                 |                |                  |                |                  | <b>D</b> | 134.04         | 67.53           |                |                  | 116.03         | 58.52            | <b>1</b>  |

MS/MS Fragmentation of ID361 **DLPFDPTGELQSLR**

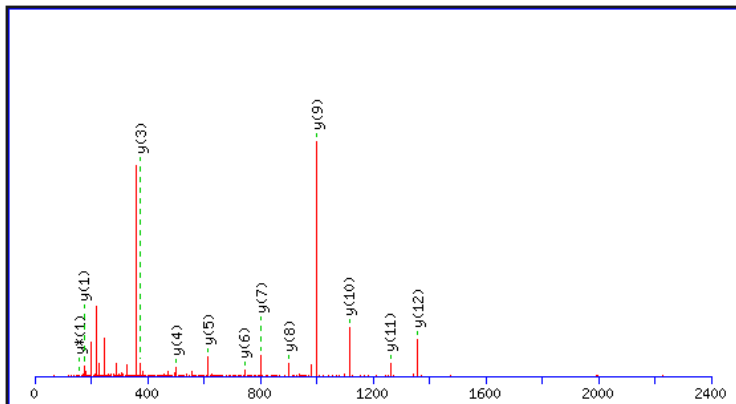

| #  | b       | b <sup>++</sup> | b*      | b <sup>+++</sup> | b <sup>0</sup> | b <sup>0++</sup> | Seq. | y       | y <sup>++</sup> | y*      | y <sup>+++</sup> | y <sup>0</sup> | y <sup>0++</sup> | #  |
|----|---------|-----------------|---------|------------------|----------------|------------------|------|---------|-----------------|---------|------------------|----------------|------------------|----|
| 1  | 116.03  | 58.52           |         |                  | 98.02          | 49.52            | D    |         |                 |         |                  |                |                  | 14 |
| 2  | 229.12  | 115.06          |         |                  | 211.11         | 106.06           | L    | 1472.77 | 736.89          | 1455.75 | 728.38           | 1454.76        | 727.89           | 13 |
| 3  | 326.17  | 163.59          |         |                  | 308.16         | 154.58           | P    | 1359.69 | 680.35          | 1342.66 | 671.84           | 1341.68        | 671.34           | 12 |
| 4  | 473.24  | 237.12          |         |                  | 455.23         | 228.12           | F    | 1262.64 | 631.82          | 1245.61 | 623.31           | 1244.63        | 622.82           | 11 |
| 5  | 588.27  | 294.64          |         |                  | 570.26         | 285.63           | D    | 1115.57 | 558.29          | 1098.54 | 549.77           | 1097.56        | 549.28           | 10 |
| 6  | 685.32  | 343.16          |         |                  | 667.31         | 334.16           | P    | 1000.54 | 500.77          | 983.52  | 492.26           | 982.53         | 491.77           | 9  |
| 7  | 786.37  | 393.69          |         |                  | 768.36         | 384.68           | T    | 903.49  | 452.25          | 886.46  | 443.74           | 885.48         | 443.24           | 8  |
| 8  | 843.39  | 422.20          |         |                  | 825.38         | 413.19           | G    | 802.44  | 401.72          | 785.42  | 393.21           | 784.43         | 392.72           | 7  |
| 9  | 972.43  | 486.72          |         |                  | 954.42         | 477.71           | E    | 745.42  | 373.21          | 728.39  | 364.70           | 727.41         | 364.21           | 6  |
| 10 | 1085.51 | 543.26          |         |                  | 1067.50        | 534.26           | L    | 616.38  | 308.69          | 599.35  | 300.18           | 598.37         | 299.69           | 5  |
| 11 | 1213.57 | 607.29          | 1196.55 | 598.78           | 1195.56        | 598.29           | Q    | 503.29  | 252.15          | 486.27  | 243.64           | 485.28         | 243.15           | 4  |
| 12 | 1300.61 | 650.81          | 1283.58 | 642.29           | 1282.59        | 641.80           | S    | 375.24  | 188.12          | 358.21  | 179.61           | 357.22         | 179.12           | 3  |
| 13 | 1413.69 | 707.35          | 1396.66 | 698.84           | 1395.68        | 698.34           | L    | 288.20  | 144.61          | 271.18  | 136.09           |                |                  | 2  |
| 14 |         |                 |         |                  |                |                  | R    | 175.12  | 88.06           | 158.09  | 79.55            |                |                  | 1  |

MS/MS Fragmentation of ID362 **VQAIKDLEELEQR**

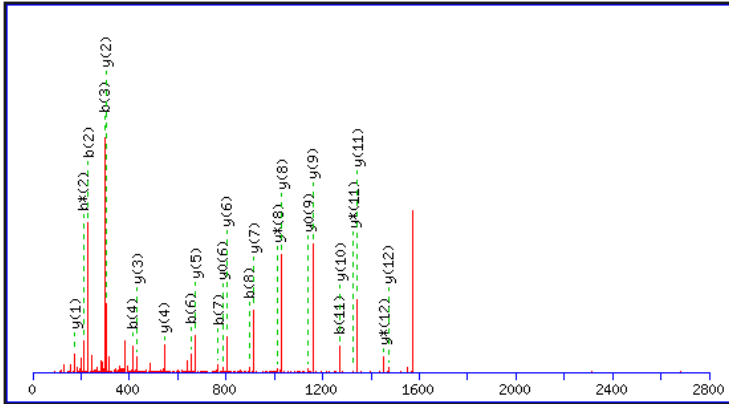

| #  | b       | b <sup>++</sup> | b <sup>*</sup> | b <sup>*++</sup> | b <sup>0</sup> | b <sup>0++</sup> | Seq. | y       | y <sup>++</sup> | y <sup>*</sup> | y <sup>*++</sup> | y <sup>0</sup> | y <sup>0++</sup> | #  |
|----|---------|-----------------|----------------|------------------|----------------|------------------|------|---------|-----------------|----------------|------------------|----------------|------------------|----|
| 1  | 100.08  | 50.54           |                |                  |                |                  | V    |         |                 |                |                  |                |                  | 13 |
| 2  | 228.13  | 114.57          | 211.11         | 106.06           |                |                  | Q    | 1471.78 | 736.39          | 1454.75        | 727.88           | 1453.76        | 727.39           | 12 |
| 3  | 299.17  | 150.09          | 282.14         | 141.58           |                |                  | A    | 1343.72 | 672.36          | 1326.69        | 663.85           | 1325.71        | 663.36           | 11 |
| 4  | 412.26  | 206.63          | 395.23         | 198.12           |                |                  | I    | 1272.68 | 636.84          | 1255.65        | 628.33           | 1254.67        | 627.84           | 10 |
| 5  | 540.35  | 270.68          | 523.32         | 262.17           |                |                  | K    | 1159.60 | 580.30          | 1142.57        | 571.79           | 1141.58        | 571.30           | 9  |
| 6  | 655.38  | 328.19          | 638.35         | 319.68           | 637.37         | 319.19           | D    | 1031.50 | 516.25          | 1014.47        | 507.74           | 1013.49        | 507.25           | 8  |
| 7  | 768.46  | 384.73          | 751.43         | 376.22           | 750.45         | 375.73           | L    | 916.47  | 458.74          | 899.45         | 450.23           | 898.46         | 449.74           | 7  |
| 8  | 897.50  | 449.26          | 880.48         | 440.74           | 879.49         | 440.25           | E    | 803.39  | 402.20          | 786.36         | 393.69           | 785.38         | 393.19           | 6  |
| 9  | 1026.55 | 513.78          | 1009.52        | 505.26           | 1008.54        | 504.77           | E    | 674.35  | 337.68          | 657.32         | 329.16           | 656.34         | 328.67           | 5  |
| 10 | 1139.63 | 570.32          | 1122.60        | 561.81           | 1121.62        | 561.31           | L    | 545.30  | 273.16          | 528.28         | 264.64           | 527.29         | 264.15           | 4  |
| 11 | 1268.67 | 634.84          | 1251.65        | 626.33           | 1250.66        | 625.83           | E    | 432.22  | 216.61          | 415.19         | 208.10           | 414.21         | 207.61           | 3  |
| 12 | 1396.73 | 698.87          | 1379.71        | 690.36           | 1378.72        | 689.86           | Q    | 303.18  | 152.09          | 286.15         | 143.58           |                |                  | 2  |
| 13 |         |                 |                |                  |                |                  | R    | 175.12  | 88.06           | 158.09         | 79.55            |                |                  | 1  |

MS/MS Fragmentation of ID365 **LDDLEQNVR**

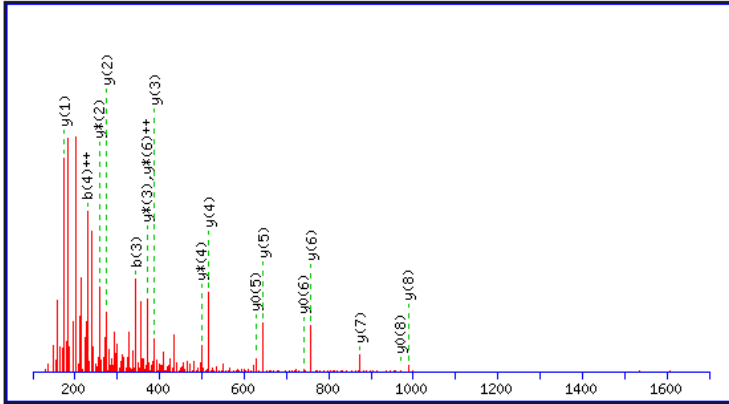

| #        | <b>b</b>      | <b>b<sup>++</sup></b> | <b>b<sup>*</sup></b> | <b>b<sup>*++</sup></b> | <b>b<sup>0</sup></b> | <b>b<sup>0++</sup></b> | Seq.     | <b>y</b>      | <b>y<sup>++</sup></b> | <b>y<sup>*</sup></b> | <b>y<sup>*++</sup></b> | <b>y<sup>0</sup></b> | <b>y<sup>0++</sup></b> | #        |
|----------|---------------|-----------------------|----------------------|------------------------|----------------------|------------------------|----------|---------------|-----------------------|----------------------|------------------------|----------------------|------------------------|----------|
| <b>1</b> | 114.09        | 57.55                 |                      |                        |                      |                        | <b>L</b> |               |                       |                      |                        |                      |                        | <b>9</b> |
| <b>2</b> | <b>229.12</b> | 115.06                |                      |                        | 211.11               | 106.06                 | <b>D</b> | <b>988.47</b> | 494.74                | 971.44               | 486.23                 | <b>970.46</b>        | 485.73                 | <b>8</b> |
| <b>3</b> | <b>344.15</b> | 172.58                |                      |                        | 326.13               | 163.57                 | <b>D</b> | <b>873.44</b> | 437.22                | 856.42               | 428.71                 | 855.43               | 428.22                 | <b>7</b> |
| <b>4</b> | 457.23        | <b>229.12</b>         |                      |                        | 439.22               | 220.11                 | <b>L</b> | <b>758.42</b> | 379.71                | 741.39               | <b>371.20</b>          | <b>740.40</b>        | 370.71                 | <b>6</b> |
| <b>5</b> | 586.27        | 293.64                |                      |                        | 568.26               | 284.63                 | <b>E</b> | <b>645.33</b> | 323.17                | 628.30               | 314.66                 | <b>627.32</b>        | 314.16                 | <b>5</b> |
| <b>6</b> | 714.33        | 357.67                | 697.30               | 349.16                 | 696.32               | 348.66                 | <b>Q</b> | <b>516.29</b> | 258.65                | <b>499.26</b>        | 250.13                 |                      |                        | <b>4</b> |
| <b>7</b> | 828.37        | 414.69                | 811.35               | 406.18                 | 810.36               | 405.69                 | <b>N</b> | <b>388.23</b> | 194.62                | <b>371.20</b>        | 186.11                 |                      |                        | <b>3</b> |
| <b>8</b> | 927.44        | 464.22                | 910.42               | 455.71                 | 909.43               | 455.22                 | <b>V</b> | <b>274.19</b> | 137.60                | <b>257.16</b>        | 129.08                 |                      |                        | <b>2</b> |
| <b>9</b> |               |                       |                      |                        |                      |                        | <b>R</b> | <b>175.12</b> | 88.06                 | 158.09               | 79.55                  |                      |                        | <b>1</b> |



MS/MS Fragmentation of ID367 **FIEDWGSAR**

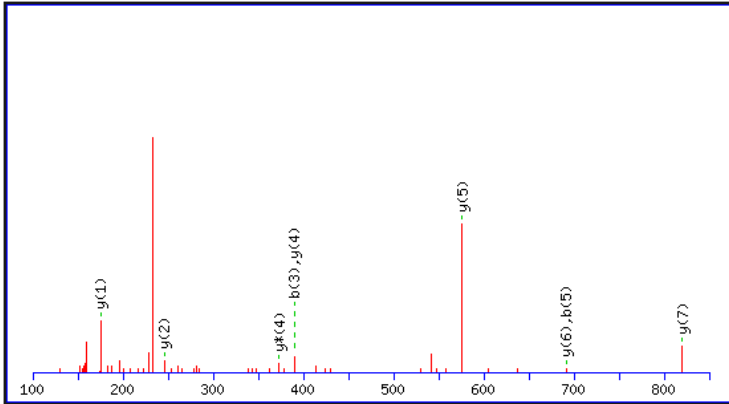

| # | b             | b <sup>++</sup> | b <sup>0</sup> | b <sup>0++</sup> | Seq. | y             | y <sup>++</sup> | y <sup>*</sup> | y <sup>+++</sup> | y <sup>0</sup> | y <sup>0++</sup> | # |
|---|---------------|-----------------|----------------|------------------|------|---------------|-----------------|----------------|------------------|----------------|------------------|---|
| 1 | 148.08        | 74.54           |                |                  | F    |               |                 |                |                  |                |                  | 9 |
| 2 | 261.16        | 131.08          |                |                  | I    | 933.44        | 467.22          | 916.42         | 458.71           | 915.43         | 458.22           | 8 |
| 3 | <b>390.20</b> | 195.60          | 372.19         | 186.60           | E    | <b>820.36</b> | 410.68          | 803.33         | 402.17           | 802.35         | 401.68           | 7 |
| 4 | 505.23        | 253.12          | 487.22         | 244.11           | D    | <b>691.32</b> | 346.16          | 674.29         | 337.65           | 673.31         | 337.16           | 6 |
| 5 | <b>691.31</b> | 346.16          | 673.30         | 337.15           | W    | <b>576.29</b> | 288.65          | 559.26         | 280.13           | 558.28         | 279.64           | 5 |
| 6 | 748.33        | 374.67          | 730.32         | 365.66           | G    | <b>390.21</b> | 195.61          | <b>373.18</b>  | 187.10           | 372.20         | 186.60           | 4 |
| 7 | 835.36        | 418.18          | 817.35         | 409.18           | S    | 333.19        | 167.10          | 316.16         | 158.58           | 315.18         | 158.09           | 3 |
| 8 | 906.40        | 453.70          | 888.39         | 444.70           | A    | <b>246.16</b> | 123.58          | 229.13         | 115.07           |                |                  | 2 |
| 9 |               |                 |                |                  | R    | <b>175.12</b> | 88.06           | 158.09         | 79.55            |                |                  | 1 |

MS/MS Fragmentation of ID370 **SGEPAFSVLVS**R

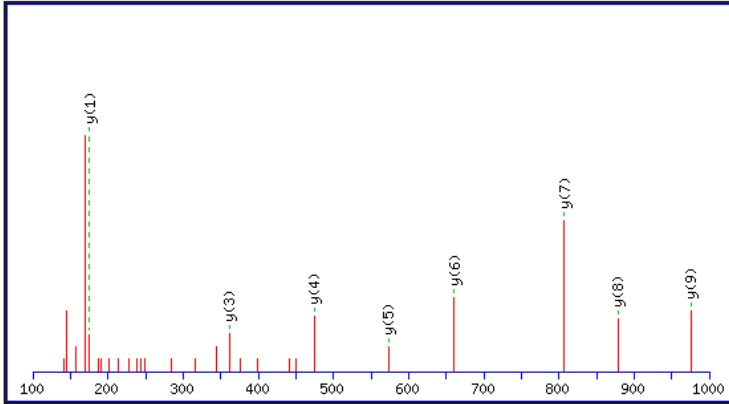

| #         | <b>b</b> | <b>b<sup>++</sup></b> | <b>b<sup>0</sup></b> | <b>b<sup>0++</sup></b> | Seq.     | <b>y</b>      | <b>y<sup>++</sup></b> | <b>y<sup>*</sup></b> | <b>y<sup>*++</sup></b> | <b>y<sup>0</sup></b> | <b>y<sup>0++</sup></b> | #         |
|-----------|----------|-----------------------|----------------------|------------------------|----------|---------------|-----------------------|----------------------|------------------------|----------------------|------------------------|-----------|
| <b>1</b>  | 88.04    | 44.52                 | 70.03                | 35.52                  | <b>S</b> |               |                       |                      |                        |                      |                        | <b>12</b> |
| <b>2</b>  | 145.06   | 73.03                 | 127.05               | 64.03                  | <b>G</b> | 1161.63       | 581.32                | 1144.60              | 572.80                 | 1143.62              | 572.31                 | <b>11</b> |
| <b>3</b>  | 274.10   | 137.56                | 256.09               | 128.55                 | <b>E</b> | 1104.60       | 552.81                | 1087.58              | 544.29                 | 1086.59              | 543.80                 | <b>10</b> |
| <b>4</b>  | 371.16   | 186.08                | 353.15               | 177.08                 | <b>P</b> | <b>975.56</b> | 488.28                | 958.54               | 479.77                 | 957.55               | 479.28                 | <b>9</b>  |
| <b>5</b>  | 442.19   | 221.60                | 424.18               | 212.59                 | <b>A</b> | <b>878.51</b> | 439.76                | 861.48               | 431.25                 | 860.50               | 430.75                 | <b>8</b>  |
| <b>6</b>  | 589.26   | 295.13                | 571.25               | 286.13                 | <b>F</b> | <b>807.47</b> | 404.24                | 790.45               | 395.73                 | 789.46               | 395.23                 | <b>7</b>  |
| <b>7</b>  | 676.29   | 338.65                | 658.28               | 329.65                 | <b>S</b> | <b>660.40</b> | 330.71                | 643.38               | 322.19                 | 642.39               | 321.70                 | <b>6</b>  |
| <b>8</b>  | 775.36   | 388.18                | 757.35               | 379.18                 | <b>V</b> | <b>573.37</b> | 287.19                | 556.35               | 278.68                 | 555.36               | 278.18                 | <b>5</b>  |
| <b>9</b>  | 888.45   | 444.73                | 870.44               | 435.72                 | <b>L</b> | <b>474.30</b> | 237.66                | 457.28               | 229.14                 | 456.29               | 228.65                 | <b>4</b>  |
| <b>10</b> | 987.51   | 494.26                | 969.50               | 485.26                 | <b>V</b> | <b>361.22</b> | 181.11                | 344.19               | 172.60                 | 343.21               | 172.11                 | <b>3</b>  |
| <b>11</b> | 1074.55  | 537.78                | 1056.54              | 528.77                 | <b>S</b> | 262.15        | 131.58                | 245.12               | 123.07                 | 244.14               | 122.57                 | <b>2</b>  |
| <b>12</b> |          |                       |                      |                        | <b>R</b> | <b>175.12</b> | 88.06                 | 158.09               | 79.55                  |                      |                        | <b>1</b>  |

MS/MS Fragmentation of ID372 **EGGPLFGFTK**

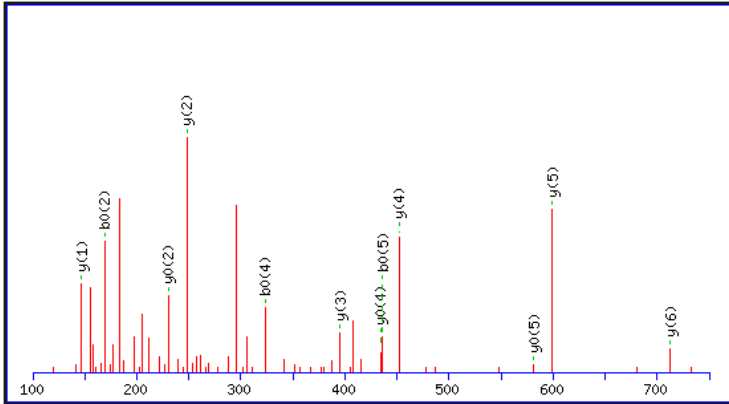

| #         | <b>b</b> | <b>b<sup>++</sup></b> | <b>b<sup>0</sup></b> | <b>b<sup>0++</sup></b> | Seq.     | <b>y</b>      | <b>y<sup>++</sup></b> | <b>y<sup>*</sup></b> | <b>y<sup>*++</sup></b> | <b>y<sup>0</sup></b> | <b>y<sup>0++</sup></b> | #         |
|-----------|----------|-----------------------|----------------------|------------------------|----------|---------------|-----------------------|----------------------|------------------------|----------------------|------------------------|-----------|
| <b>1</b>  | 130.05   | 65.53                 | 112.04               | 56.52                  | <b>E</b> |               |                       |                      |                        |                      |                        | <b>10</b> |
| <b>2</b>  | 187.07   | 94.04                 | <b>169.06</b>        | 85.03                  | <b>G</b> | 923.50        | 462.25                | 906.47               | 453.74                 | 905.49               | 453.25                 | <b>9</b>  |
| <b>3</b>  | 244.09   | 122.55                | 226.08               | 113.54                 | <b>G</b> | 866.48        | 433.74                | 849.45               | 425.23                 | 848.47               | 424.74                 | <b>8</b>  |
| <b>4</b>  | 341.15   | 171.08                | <b>323.13</b>        | 162.07                 | <b>P</b> | 809.46        | 405.23                | 792.43               | 396.72                 | 791.45               | 396.23                 | <b>7</b>  |
| <b>5</b>  | 454.23   | 227.62                | <b>436.22</b>        | 218.61                 | <b>L</b> | <b>712.40</b> | 356.71                | 695.38               | 348.19                 | 694.39               | 347.70                 | <b>6</b>  |
| <b>6</b>  | 601.30   | 301.15                | 583.29               | 292.15                 | <b>F</b> | <b>599.32</b> | 300.16                | 582.29               | 291.65                 | <b>581.31</b>        | 291.16                 | <b>5</b>  |
| <b>7</b>  | 658.32   | 329.66                | 640.31               | 320.66                 | <b>G</b> | <b>452.25</b> | 226.63                | 435.22               | 218.12                 | <b>434.24</b>        | 217.62                 | <b>4</b>  |
| <b>8</b>  | 805.39   | 403.20                | 787.38               | 394.19                 | <b>F</b> | <b>395.23</b> | 198.12                | 378.20               | 189.60                 | 377.22               | 189.11                 | <b>3</b>  |
| <b>9</b>  | 906.44   | 453.72                | 888.43               | 444.72                 | <b>T</b> | <b>248.16</b> | 124.58                | 231.13               | 116.07                 | <b>230.15</b>        | 115.58                 | <b>2</b>  |
| <b>10</b> |          |                       |                      |                        | <b>K</b> | <b>147.11</b> | 74.06                 | 130.09               | 65.55                  |                      |                        | <b>1</b>  |

MS/MS Fragmentation of ID373 **FVFFNFQR**

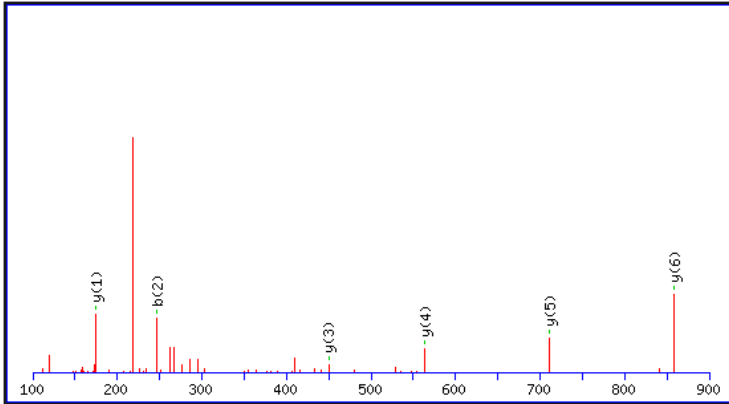

| #        | <b>b</b>      | <b>b<sup>++</sup></b> | <b>b<sup>*</sup></b> | <b>b<sup>*++</sup></b> | <b>Seq.</b> | <b>y</b>      | <b>y<sup>++</sup></b> | <b>y<sup>*</sup></b> | <b>y<sup>*++</sup></b> | #        |
|----------|---------------|-----------------------|----------------------|------------------------|-------------|---------------|-----------------------|----------------------|------------------------|----------|
| <b>1</b> | 148.08        | 74.54                 |                      |                        | <b>F</b>    |               |                       |                      |                        | <b>8</b> |
| <b>2</b> | <b>247.14</b> | 124.08                |                      |                        | <b>V</b>    | 957.49        | 479.25                | 940.47               | 470.74                 | <b>7</b> |
| <b>3</b> | 394.21        | 197.61                |                      |                        | <b>F</b>    | <b>858.43</b> | 429.72                | 841.40               | 421.20                 | <b>6</b> |
| <b>4</b> | 541.28        | 271.14                |                      |                        | <b>F</b>    | <b>711.36</b> | 356.18                | 694.33               | 347.67                 | <b>5</b> |
| <b>5</b> | 655.32        | 328.17                | 638.30               | 319.65                 | <b>N</b>    | <b>564.29</b> | 282.65                | 547.26               | 274.13                 | <b>4</b> |
| <b>6</b> | 802.39        | 401.70                | 785.37               | 393.19                 | <b>F</b>    | <b>450.25</b> | 225.63                | 433.22               | 217.11                 | <b>3</b> |
| <b>7</b> | 930.45        | 465.73                | 913.42               | 457.22                 | <b>Q</b>    | 303.18        | 152.09                | 286.15               | 143.58                 | <b>2</b> |
| <b>8</b> |               |                       |                      |                        | <b>R</b>    | <b>175.12</b> | 88.06                 | 158.09               | 79.55                  | <b>1</b> |

MS/MS Fragmentation of ID380 **IFLENVIR**

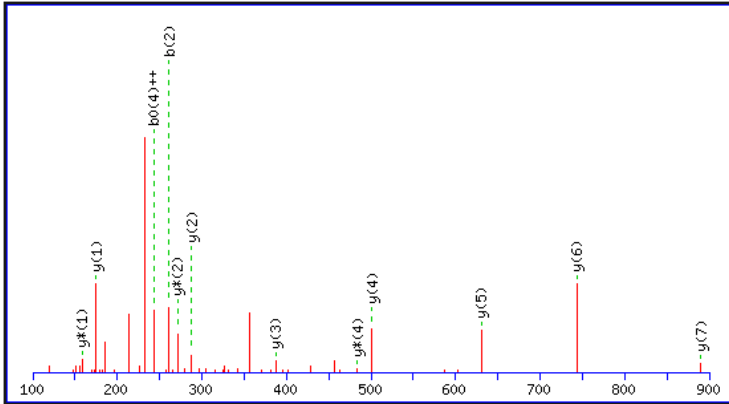

| #        | <b>b</b>      | <b>b<sup>++</sup></b> | <b>b<sup>*</sup></b> | <b>b<sup>*++</sup></b> | <b>b<sup>0</sup></b> | <b>b<sup>0++</sup></b> | Seq.     | <b>y</b>      | <b>y<sup>++</sup></b> | <b>y<sup>*</sup></b> | <b>y<sup>*++</sup></b> | <b>y<sup>0</sup></b> | <b>y<sup>0++</sup></b> | #        |
|----------|---------------|-----------------------|----------------------|------------------------|----------------------|------------------------|----------|---------------|-----------------------|----------------------|------------------------|----------------------|------------------------|----------|
| <b>1</b> | 114.09        | 57.55                 |                      |                        |                      |                        | <b>I</b> |               |                       |                      |                        |                      |                        | <b>8</b> |
| <b>2</b> | <b>261.16</b> | 131.08                |                      |                        |                      |                        | <b>F</b> | <b>890.51</b> | 445.76                | 873.48               | 437.25                 | 872.50               | 436.75                 | <b>7</b> |
| <b>3</b> | 374.24        | 187.63                |                      |                        |                      |                        | <b>L</b> | <b>743.44</b> | 372.22                | 726.41               | 363.71                 | 725.43               | 363.22                 | <b>6</b> |
| <b>4</b> | 503.29        | 252.15                |                      |                        | 485.28               | <b>243.14</b>          | <b>E</b> | <b>630.36</b> | 315.68                | 613.33               | 307.17                 | 612.35               | 306.68                 | <b>5</b> |
| <b>5</b> | 617.33        | 309.17                | 600.30               | 300.66                 | 599.32               | 300.16                 | <b>N</b> | <b>501.31</b> | 251.16                | <b>484.29</b>        | 242.65                 |                      |                        | <b>4</b> |
| <b>6</b> | 716.40        | 358.70                | 699.37               | 350.19                 | 698.39               | 349.70                 | <b>V</b> | <b>387.27</b> | 194.14                | 370.24               | 185.63                 |                      |                        | <b>3</b> |
| <b>7</b> | 829.48        | 415.24                | 812.46               | 406.73                 | 811.47               | 406.24                 | <b>I</b> | <b>288.20</b> | 144.61                | <b>271.18</b>        | 136.09                 |                      |                        | <b>2</b> |
| <b>8</b> |               |                       |                      |                        |                      |                        | <b>R</b> | <b>175.12</b> | 88.06                 | <b>158.09</b>        | 79.55                  |                      |                        | <b>1</b> |

MS/MS Fragmentation of ID381 **QPQYTPLPIEK**

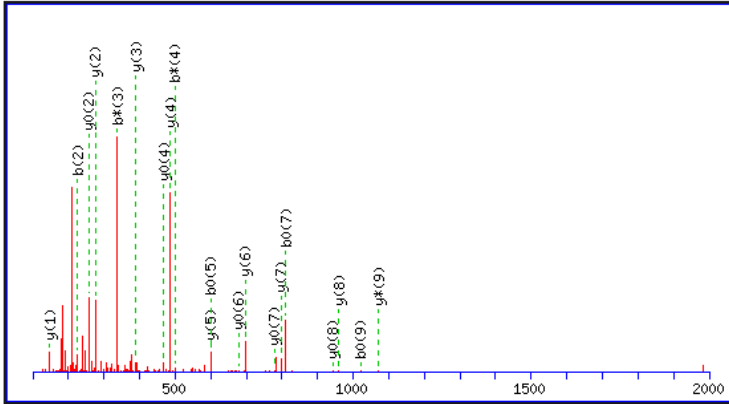

| #  | b             | b <sup>++</sup> | b*            | b <sup>*++</sup> | b <sup>0</sup> | b <sup>0++</sup> | Seq. | y             | y <sup>++</sup> | y*             | y <sup>*++</sup> | y <sup>0</sup> | y <sup>0++</sup> | #  |
|----|---------------|-----------------|---------------|------------------|----------------|------------------|------|---------------|-----------------|----------------|------------------|----------------|------------------|----|
| 1  | 129.07        | 65.04           | 112.04        | 56.52            |                |                  | Q    |               |                 |                |                  |                |                  | 11 |
| 2  | <b>226.12</b> | 113.56          | 209.09        | 105.05           |                |                  | P    | 1185.65       | 593.33          | 1168.62        | 584.82           | 1167.64        | 584.32           | 10 |
| 3  | 354.18        | 177.59          | <b>337.15</b> | 169.08           |                |                  | Q    | 1088.60       | 544.80          | <b>1071.57</b> | 536.29           | 1070.59        | 535.80           | 9  |
| 4  | 517.24        | 259.12          | <b>500.21</b> | 250.61           |                |                  | Y    | <b>960.54</b> | 480.77          | 943.51         | 472.26           | <b>942.53</b>  | 471.77           | 8  |
| 5  | 618.29        | 309.65          | 601.26        | 301.13           | <b>600.28</b>  | 300.64           | T    | <b>797.48</b> | 399.24          | 780.45         | 390.73           | <b>779.47</b>  | 390.24           | 7  |
| 6  | 715.34        | 358.17          | 698.31        | 349.66           | 697.33         | 349.17           | P    | <b>696.43</b> | 348.72          | 679.40         | 340.20           | <b>678.42</b>  | 339.71           | 6  |
| 7  | 828.43        | 414.72          | 811.40        | 406.20           | <b>810.41</b>  | 405.71           | L    | <b>599.38</b> | 300.19          | 582.35         | 291.68           | 581.37         | 291.19           | 5  |
| 8  | 925.48        | 463.24          | 908.45        | 454.73           | 907.47         | 454.24           | P    | <b>486.29</b> | 243.65          | 469.27         | 235.14           | <b>468.28</b>  | 234.64           | 4  |
| 9  | 1038.56       | 519.78          | 1021.54       | 511.27           | <b>1020.55</b> | 510.78           | I    | <b>389.24</b> | 195.12          | 372.21         | 186.61           | 371.23         | 186.12           | 3  |
| 10 | 1167.60       | 584.31          | 1150.58       | 575.79           | 1149.59        | 575.30           | E    | <b>276.16</b> | 138.58          | 259.13         | 130.07           | <b>258.14</b>  | 129.58           | 2  |
| 11 |               |                 |               |                  |                |                  | K    | <b>147.11</b> | 74.06           | 130.09         | 65.55            |                |                  | 1  |

MS/MS Fragmentation of ID386 **NKLDHYQILK**

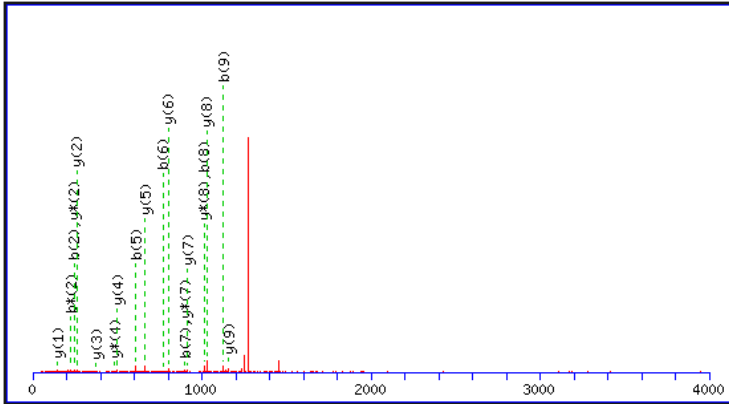

| #  | b              | b <sup>++</sup> | b*            | b <sup>*++</sup> | b <sup>0</sup> | b <sup>0++</sup> | Seq. | y              | y <sup>++</sup> | y*             | y <sup>*++</sup> | y <sup>0</sup> | y <sup>0++</sup> | #  |
|----|----------------|-----------------|---------------|------------------|----------------|------------------|------|----------------|-----------------|----------------|------------------|----------------|------------------|----|
| 1  | 115.05         | 58.03           | 98.02         | 49.52            |                |                  | N    |                |                 |                |                  |                |                  | 10 |
| 2  | <b>243.15</b>  | 122.08          | <b>226.12</b> | 113.56           |                |                  | K    | <b>1157.67</b> | 579.34          | 1140.64        | 570.82           | 1139.66        | 570.33           | 9  |
| 3  | 356.23         | 178.62          | 339.20        | 170.10           |                |                  | L    | <b>1029.57</b> | 515.29          | <b>1012.55</b> | 506.78           | 1011.56        | 506.28           | 8  |
| 4  | 471.26         | 236.13          | 454.23        | 227.62           | 453.25         | 227.13           | D    | <b>916.49</b>  | 458.75          | <b>899.46</b>  | 450.23           | 898.48         | 449.74           | 7  |
| 5  | <b>608.32</b>  | 304.66          | 591.29        | 296.15           | 590.30         | 295.66           | H    | <b>801.46</b>  | 401.23          | 784.44         | 392.72           |                |                  | 6  |
| 6  | <b>771.38</b>  | 386.19          | 754.35        | 377.68           | 753.37         | 377.19           | Y    | <b>664.40</b>  | 332.71          | 647.38         | 324.19           |                |                  | 5  |
| 7  | <b>899.44</b>  | 450.22          | 882.41        | 441.71           | 881.43         | 441.22           | Q    | <b>501.34</b>  | 251.17          | <b>484.31</b>  | 242.66           |                |                  | 4  |
| 8  | <b>1012.52</b> | 506.76          | 995.49        | 498.25           | 994.51         | 497.76           | I    | <b>373.28</b>  | 187.14          | 356.25         | 178.63           |                |                  | 3  |
| 9  | <b>1125.61</b> | 563.31          | 1108.58       | 554.79           | 1107.59        | 554.30           | L    | <b>260.20</b>  | 130.60          | <b>243.17</b>  | 122.09           |                |                  | 2  |
| 10 |                |                 |               |                  |                |                  | K    | <b>147.11</b>  | 74.06           | 130.09         | 65.55            |                |                  | 1  |

MS/MS Fragmentation of ID388 **LSAVVAWENSK**

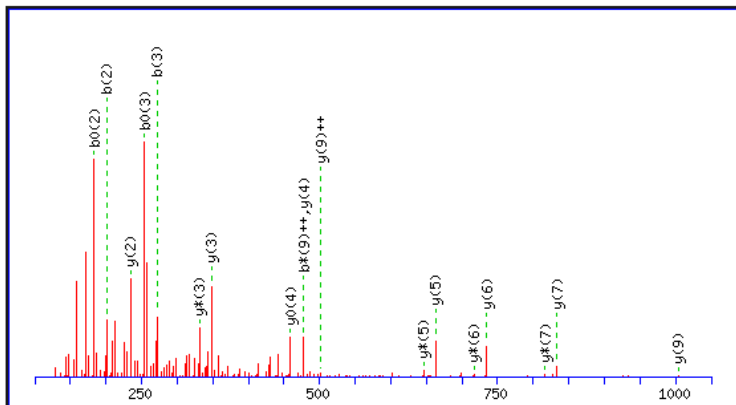

| #  | b             | b <sup>++</sup> | b <sup>*</sup> | b <sup>*++</sup> | b <sup>0</sup> | b <sup>0++</sup> | Seq. | y              | y <sup>++</sup> | y <sup>*</sup> | y <sup>*++</sup> | y <sup>0</sup> | y <sup>0++</sup> | #  |
|----|---------------|-----------------|----------------|------------------|----------------|------------------|------|----------------|-----------------|----------------|------------------|----------------|------------------|----|
| 1  | 114.09        | 57.55           |                |                  |                |                  | L    |                |                 |                |                  |                |                  | 11 |
| 2  | <b>201.12</b> | 101.07          |                |                  | <b>183.11</b>  | 92.06            | S    | 1090.55        | 545.78          | 1073.53        | 537.27           | 1072.54        | 536.77           | 10 |
| 3  | <b>272.16</b> | 136.58          |                |                  | <b>254.15</b>  | 127.58           | A    | <b>1003.52</b> | <b>502.26</b>   | 986.49         | 493.75           | 985.51         | 493.26           | 9  |
| 4  | 371.23        | 186.12          |                |                  | 353.22         | 177.11           | V    | 932.48         | 466.75          | 915.46         | 458.23           | 914.47         | 457.74           | 8  |
| 5  | 470.30        | 235.65          |                |                  | 452.29         | 226.65           | V    | <b>833.42</b>  | 417.21          | <b>816.39</b>  | 408.70           | 815.40         | 408.21           | 7  |
| 6  | 541.33        | 271.17          |                |                  | 523.32         | 262.17           | A    | <b>734.35</b>  | 367.68          | <b>717.32</b>  | 359.16           | 716.34         | 358.67           | 6  |
| 7  | 727.41        | 364.21          |                |                  | 709.40         | 355.21           | W    | <b>663.31</b>  | 332.16          | <b>646.28</b>  | 323.65           | 645.30         | 323.15           | 5  |
| 8  | 856.46        | 428.73          |                |                  | 838.45         | 419.73           | E    | <b>477.23</b>  | 239.12          | 460.20         | 230.61           | <b>459.22</b>  | 230.11           | 4  |
| 9  | 970.50        | 485.75          | 953.47         | <b>477.24</b>    | 952.49         | 476.75           | N    | <b>348.19</b>  | 174.60          | <b>331.16</b>  | 166.08           | 330.18         | 165.59           | 3  |
| 10 | 1057.53       | 529.27          | 1040.50        | 520.76           | 1039.52        | 520.26           | S    | <b>234.14</b>  | 117.58          | 217.12         | 109.06           | 216.13         | 108.57           | 2  |
| 11 |               |                 |                |                  |                |                  | K    | 147.11         | 74.06           | 130.09         | 65.55            |                |                  | 1  |



MS/MS Fragmentation of ID389 **GYFVLNDVFR**

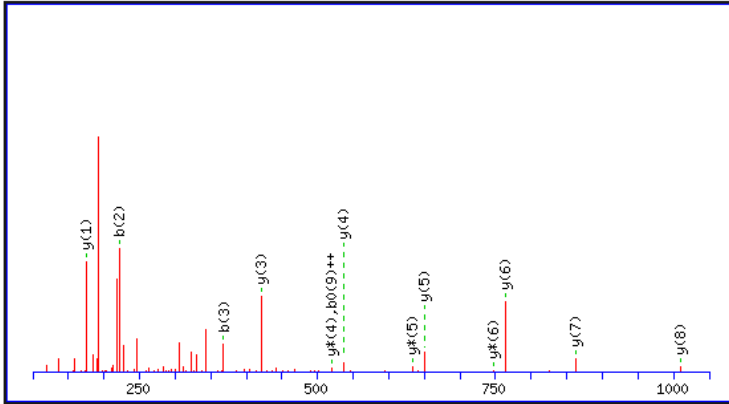

| #         | b             | b <sup>++</sup> | b <sup>*</sup> | b <sup>*++</sup> | b <sup>0</sup> | b <sup>0++</sup> | Seq.     | y              | y <sup>++</sup> | y <sup>*</sup> | y <sup>*++</sup> | y <sup>0</sup> | y <sup>0++</sup> | #         |
|-----------|---------------|-----------------|----------------|------------------|----------------|------------------|----------|----------------|-----------------|----------------|------------------|----------------|------------------|-----------|
| <b>1</b>  | 58.03         | 29.52           |                |                  |                |                  | <b>G</b> |                |                 |                |                  |                |                  | <b>10</b> |
| <b>2</b>  | <b>221.09</b> | 111.05          |                |                  |                |                  | <b>Y</b> | 1172.61        | 586.81          | 1155.58        | 578.30           | 1154.60        | 577.80           | <b>9</b>  |
| <b>3</b>  | <b>368.16</b> | 184.58          |                |                  |                |                  | <b>F</b> | <b>1009.55</b> | 505.28          | 992.52         | 496.76           | 991.54         | 496.27           | <b>8</b>  |
| <b>4</b>  | 467.23        | 234.12          |                |                  |                |                  | <b>V</b> | <b>862.48</b>  | 431.74          | 845.45         | 423.23           | 844.47         | 422.74           | <b>7</b>  |
| <b>5</b>  | 580.31        | 290.66          |                |                  |                |                  | <b>L</b> | <b>763.41</b>  | 382.21          | <b>746.38</b>  | 373.70           | 745.40         | 373.20           | <b>6</b>  |
| <b>6</b>  | 694.36        | 347.68          | 677.33         | 339.17           |                |                  | <b>N</b> | <b>650.33</b>  | 325.67          | <b>633.30</b>  | 317.15           | 632.32         | 316.66           | <b>5</b>  |
| <b>7</b>  | 809.38        | 405.20          | 792.36         | 396.68           | 791.37         | 396.19           | <b>D</b> | <b>536.28</b>  | 268.64          | <b>519.26</b>  | 260.13           | 518.27         | 259.64           | <b>4</b>  |
| <b>8</b>  | 908.45        | 454.73          | 891.42         | 446.22           | 890.44         | 445.72           | <b>V</b> | <b>421.26</b>  | 211.13          | 404.23         | 202.62           |                |                  | <b>3</b>  |
| <b>9</b>  | 1055.52       | 528.26          | 1038.49        | 519.75           | 1037.51        | <b>519.26</b>    | <b>F</b> | 322.19         | 161.60          | 305.16         | 153.08           |                |                  | <b>2</b>  |
| <b>10</b> |               |                 |                |                  |                |                  | <b>R</b> | <b>175.12</b>  | 88.06           | 158.09         | 79.55            |                |                  | <b>1</b>  |

MS/MS Fragmentation of ID390 **QNAFLLLDWIR**

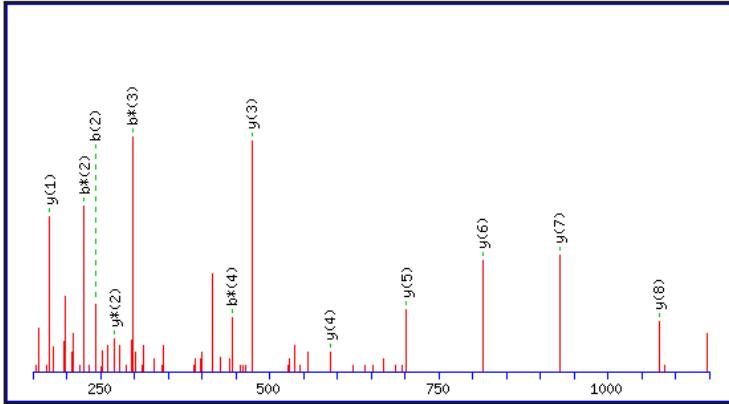

| #  | b             | b <sup>++</sup> | b*            | b <sup>*++</sup> | b <sup>0</sup> | b <sup>0++</sup> | Seq. | y              | y <sup>++</sup> | y*            | y <sup>*++</sup> | y <sup>0</sup> | y <sup>0++</sup> | #  |
|----|---------------|-----------------|---------------|------------------|----------------|------------------|------|----------------|-----------------|---------------|------------------|----------------|------------------|----|
| 1  | 129.07        | 65.04           | 112.04        | 56.52            |                |                  | Q    |                |                 |               |                  |                |                  | 11 |
| 2  | <b>243.11</b> | 122.06          | <b>226.08</b> | 113.54           |                |                  | N    | 1260.71        | 630.86          | 1243.68       | 622.35           | 1242.70        | 621.85           | 10 |
| 3  | 314.15        | 157.58          | <b>297.12</b> | 149.06           |                |                  | A    | 1146.67        | 573.84          | 1129.64       | 565.32           | 1128.66        | 564.83           | 9  |
| 4  | 461.21        | 231.11          | <b>444.19</b> | 222.60           |                |                  | F    | <b>1075.63</b> | 538.32          | 1058.60       | 529.81           | 1057.62        | 529.31           | 8  |
| 5  | 574.30        | 287.65          | 557.27        | 279.14           |                |                  | L    | <b>928.56</b>  | 464.78          | 911.53        | 456.27           | 910.55         | 455.78           | 7  |
| 6  | 687.38        | 344.19          | 670.36        | 335.68           |                |                  | L    | <b>815.48</b>  | 408.24          | 798.45        | 399.73           | 797.47         | 399.24           | 6  |
| 7  | 800.47        | 400.74          | 783.44        | 392.22           |                |                  | L    | <b>702.39</b>  | 351.70          | 685.37        | 343.19           | 684.38         | 342.70           | 5  |
| 8  | 915.49        | 458.25          | 898.47        | 449.74           | 897.48         | 449.25           | D    | <b>589.31</b>  | 295.16          | 572.28        | 286.64           | 571.30         | 286.15           | 4  |
| 9  | 1101.57       | 551.29          | 1084.55       | 542.78           | 1083.56        | 542.28           | W    | <b>474.28</b>  | 237.64          | 457.26        | 229.13           |                |                  | 3  |
| 10 | 1214.66       | 607.83          | 1197.63       | 599.32           | 1196.65        | 598.83           | I    | 288.20         | 144.61          | <b>271.18</b> | 136.09           |                |                  | 2  |
| 11 |               |                 |               |                  |                |                  | R    | <b>175.12</b>  | 88.06           | 158.09        | 79.55            |                |                  | 1  |

MS/MS Fragmentation of ID391 **LNWATLGAGER**

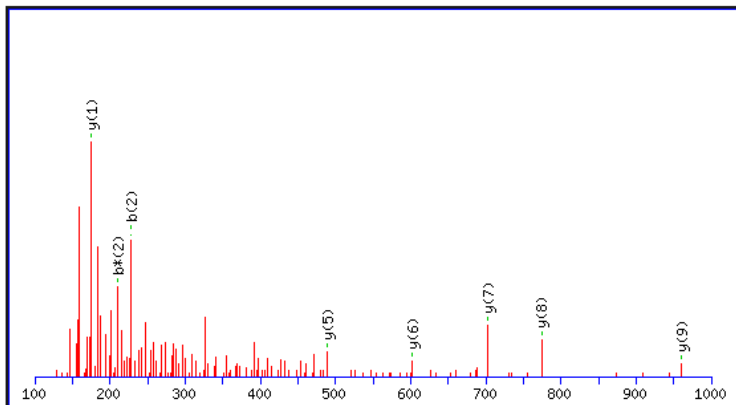

| #         | <b>b</b>      | <b>b<sup>++</sup></b> | <b>b<sup>*</sup></b> | <b>b<sup>*++</sup></b> | <b>b<sup>0</sup></b> | <b>b<sup>0++</sup></b> | Seq.     | <b>y</b>      | <b>y<sup>++</sup></b> | <b>y<sup>*</sup></b> | <b>y<sup>*++</sup></b> | <b>y<sup>0</sup></b> | <b>y<sup>0++</sup></b> | #         |
|-----------|---------------|-----------------------|----------------------|------------------------|----------------------|------------------------|----------|---------------|-----------------------|----------------------|------------------------|----------------------|------------------------|-----------|
| <b>1</b>  | 114.09        | 57.55                 |                      |                        |                      |                        | <b>L</b> |               |                       |                      |                        |                      |                        | <b>11</b> |
| <b>2</b>  | <b>228.13</b> | 114.57                | <b>211.11</b>        | 106.06                 |                      |                        | <b>N</b> | 1074.53       | 537.77                | 1057.51              | 529.26                 | 1056.52              | 528.76                 | <b>10</b> |
| <b>3</b>  | 414.21        | 207.61                | 397.19               | 199.10                 |                      |                        | <b>W</b> | <b>960.49</b> | 480.75                | 943.46               | 472.24                 | 942.48               | 471.74                 | <b>9</b>  |
| <b>4</b>  | 485.25        | 243.13                | 468.22               | 234.62                 |                      |                        | <b>A</b> | <b>774.41</b> | 387.71                | 757.38               | 379.20                 | 756.40               | 378.70                 | <b>8</b>  |
| <b>5</b>  | 586.30        | 293.65                | 569.27               | 285.14                 | 568.29               | 284.65                 | <b>T</b> | <b>703.37</b> | 352.19                | 686.35               | 343.68                 | 685.36               | 343.19                 | <b>7</b>  |
| <b>6</b>  | 699.38        | 350.19                | 682.36               | 341.68                 | 681.37               | 341.19                 | <b>L</b> | <b>602.33</b> | 301.67                | 585.30               | 293.15                 | 584.32               | 292.66                 | <b>6</b>  |
| <b>7</b>  | 756.40        | 378.71                | 739.38               | 370.19                 | 738.39               | 369.70                 | <b>G</b> | <b>489.24</b> | 245.12                | 472.22               | 236.61                 | 471.23               | 236.12                 | <b>5</b>  |
| <b>8</b>  | 827.44        | 414.22                | 810.41               | 405.71                 | 809.43               | 405.22                 | <b>A</b> | 432.22        | 216.61                | 415.19               | 208.10                 | 414.21               | 207.61                 | <b>4</b>  |
| <b>9</b>  | 884.46        | 442.73                | 867.44               | 434.22                 | 866.45               | 433.73                 | <b>G</b> | 361.18        | 181.10                | 344.16               | 172.58                 | 343.17               | 172.09                 | <b>3</b>  |
| <b>10</b> | 1013.51       | 507.26                | 996.48               | 498.74                 | 995.49               | 498.25                 | <b>E</b> | 304.16        | 152.58                | 287.13               | 144.07                 | 286.15               | 143.58                 | <b>2</b>  |
| <b>11</b> |               |                       |                      |                        |                      |                        | <b>R</b> | <b>175.12</b> | 88.06                 | 158.09               | 79.55                  |                      |                        | <b>1</b>  |

MS/MS Fragmentation of ID392 **AVDVTAPGGNPVQGR**

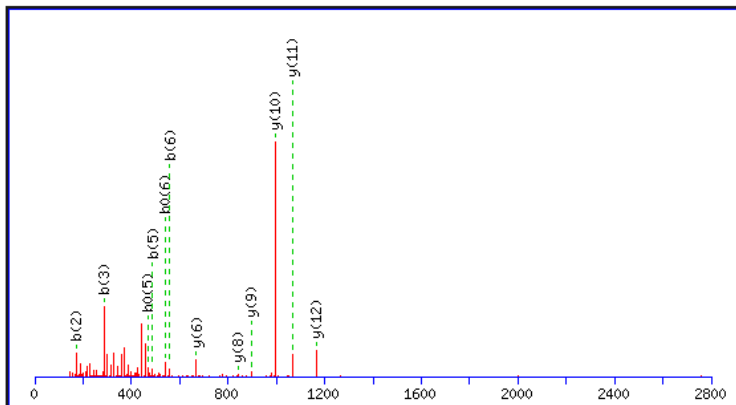

| #  | b       | b <sup>++</sup> | b*      | b <sup>*++</sup> | b <sup>0</sup> | b <sup>0++</sup> | Seq. | y       | y <sup>++</sup> | y*      | y <sup>*++</sup> | y <sup>0</sup> | y <sup>0++</sup> | #  |
|----|---------|-----------------|---------|------------------|----------------|------------------|------|---------|-----------------|---------|------------------|----------------|------------------|----|
| 1  | 72.04   | 36.53           |         |                  |                |                  | A    |         |                 |         |                  |                |                  | 16 |
| 2  | 171.11  | 86.06           |         |                  |                |                  | V    | 1479.79 | 740.40          | 1462.76 | 731.89           | 1461.78        | 731.39           | 15 |
| 3  | 286.14  | 143.57          |         |                  | 268.13         | 134.57           | D    | 1380.72 | 690.87          | 1363.70 | 682.35           | 1362.71        | 681.86           | 14 |
| 4  | 385.21  | 193.11          |         |                  | 367.20         | 184.10           | V    | 1265.70 | 633.35          | 1248.67 | 624.84           | 1247.69        | 624.35           | 13 |
| 5  | 486.26  | 243.63          |         |                  | 468.25         | 234.63           | T    | 1166.63 | 583.82          | 1149.60 | 575.30           | 1148.62        | 574.81           | 12 |
| 6  | 557.29  | 279.15          |         |                  | 539.28         | 270.14           | A    | 1065.58 | 533.29          | 1048.55 | 524.78           |                |                  | 11 |
| 7  | 654.35  | 327.68          |         |                  | 636.34         | 318.67           | P    | 994.54  | 497.78          | 977.52  | 489.26           |                |                  | 10 |
| 8  | 711.37  | 356.19          |         |                  | 693.36         | 347.18           | G    | 897.49  | 449.25          | 880.46  | 440.74           |                |                  | 9  |
| 9  | 768.39  | 384.70          |         |                  | 750.38         | 375.69           | G    | 840.47  | 420.74          | 823.44  | 412.22           |                |                  | 8  |
| 10 | 882.43  | 441.72          | 865.41  | 433.21           | 864.42         | 432.71           | N    | 783.45  | 392.23          | 766.42  | 383.71           |                |                  | 7  |
| 11 | 979.48  | 490.25          | 962.46  | 481.73           | 961.47         | 481.24           | P    | 669.40  | 335.21          | 652.38  | 326.69           |                |                  | 6  |
| 12 | 1078.55 | 539.78          | 1061.53 | 531.27           | 1060.54        | 530.77           | V    | 572.35  | 286.68          | 555.32  | 278.17           |                |                  | 5  |
| 13 | 1206.61 | 603.81          | 1189.58 | 595.30           | 1188.60        | 594.80           | Q    | 473.28  | 237.15          | 456.26  | 228.63           |                |                  | 4  |
| 14 | 1263.63 | 632.32          | 1246.61 | 623.81           | 1245.62        | 623.31           | G    | 345.22  | 173.12          | 328.20  | 164.60           |                |                  | 3  |
| 15 | 1376.72 | 688.86          | 1359.69 | 680.35           | 1358.71        | 679.86           | I    | 288.20  | 144.61          | 271.18  | 136.09           |                |                  | 2  |
| 16 |         |                 |         |                  |                |                  | R    | 175.12  | 88.06           | 158.09  | 79.55            |                |                  | 1  |

MS/MS Fragmentation of ID394 **QVVSDEAR**

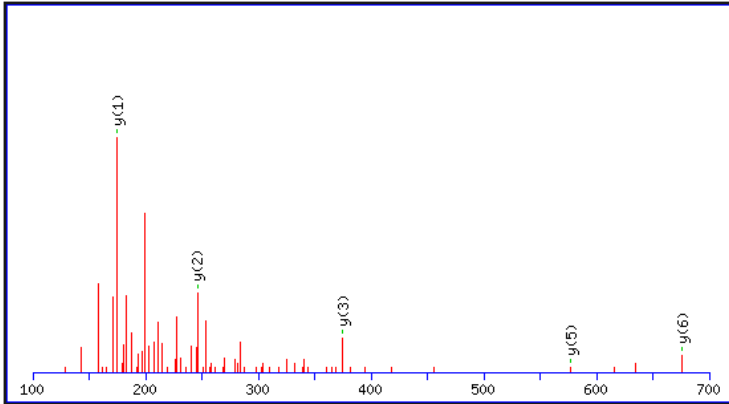

| #        | <b>b</b> | <b>b<sup>++</sup></b> | <b>b<sup>*</sup></b> | <b>b<sup>*++</sup></b> | <b>b<sup>0</sup></b> | <b>b<sup>0++</sup></b> | Seq.     | <b>y</b>      | <b>y<sup>++</sup></b> | <b>y<sup>*</sup></b> | <b>y<sup>*++</sup></b> | <b>y<sup>0</sup></b> | <b>y<sup>0++</sup></b> | #        |
|----------|----------|-----------------------|----------------------|------------------------|----------------------|------------------------|----------|---------------|-----------------------|----------------------|------------------------|----------------------|------------------------|----------|
| <b>1</b> | 129.07   | 65.04                 | 112.04               | 56.52                  |                      |                        | <b>Q</b> |               |                       |                      |                        |                      |                        | <b>8</b> |
| <b>2</b> | 228.13   | 114.57                | 211.11               | 106.06                 |                      |                        | <b>V</b> | 775.39        | 388.20                | 758.37               | 379.69                 | 757.38               | 379.20                 | <b>7</b> |
| <b>3</b> | 327.20   | 164.10                | 310.18               | 155.59                 |                      |                        | <b>V</b> | <b>676.33</b> | 338.67                | 659.30               | 330.15                 | 658.32               | 329.66                 | <b>6</b> |
| <b>4</b> | 414.23   | 207.62                | 397.21               | 199.11                 | 396.22               | 198.62                 | <b>S</b> | <b>577.26</b> | 289.13                | 560.23               | 280.62                 | 559.25               | 280.13                 | <b>5</b> |
| <b>5</b> | 529.26   | 265.13                | 512.24               | 256.62                 | 511.25               | 256.13                 | <b>D</b> | 490.23        | 245.62                | 473.20               | 237.10                 | 472.22               | 236.61                 | <b>4</b> |
| <b>6</b> | 658.30   | 329.66                | 641.28               | 321.14                 | 640.29               | 320.65                 | <b>E</b> | <b>375.20</b> | 188.10                | 358.17               | 179.59                 | 357.19               | 179.10                 | <b>3</b> |
| <b>7</b> | 729.34   | 365.17                | 712.31               | 356.66                 | 711.33               | 356.17                 | <b>A</b> | <b>246.16</b> | 123.58                | 229.13               | 115.07                 |                      |                        | <b>2</b> |
| <b>8</b> |          |                       |                      |                        |                      |                        | <b>R</b> | <b>175.12</b> | 88.06                 | 158.09               | 79.55                  |                      |                        | <b>1</b> |

MS/MS Fragmentation of ID396 **DIGETDPDIFYTNR**

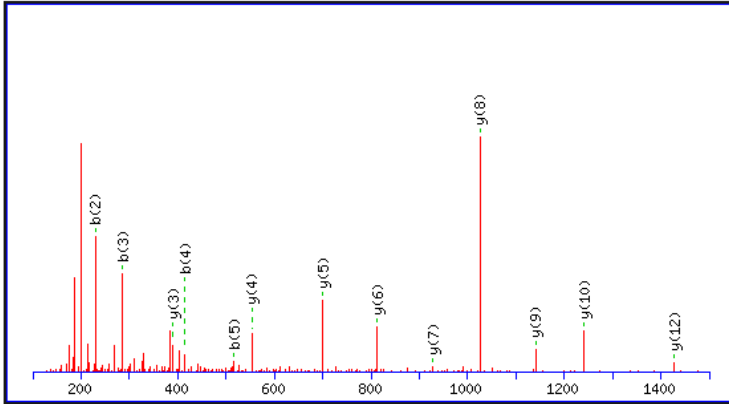

| #         | <b>b</b>      | <b>b<sup>++</sup></b> | <b>b<sup>*</sup></b> | <b>b<sup>*++</sup></b> | <b>b<sup>0</sup></b> | <b>b<sup>0++</sup></b> | Seq.     | <b>y</b>       | <b>y<sup>++</sup></b> | <b>y<sup>*</sup></b> | <b>y<sup>*++</sup></b> | <b>y<sup>0</sup></b> | <b>y<sup>0++</sup></b> | #         |
|-----------|---------------|-----------------------|----------------------|------------------------|----------------------|------------------------|----------|----------------|-----------------------|----------------------|------------------------|----------------------|------------------------|-----------|
| <b>1</b>  | 116.03        | 58.52                 |                      |                        | 98.02                | 49.52                  | <b>D</b> |                |                       |                      |                        |                      |                        | <b>14</b> |
| <b>2</b>  | <b>229.12</b> | 115.06                |                      |                        | 211.11               | 106.06                 | <b>I</b> | 1540.73        | 770.87                | 1523.70              | 762.35                 | 1522.72              | 761.86                 | <b>13</b> |
| <b>3</b>  | <b>286.14</b> | 143.57                |                      |                        | 268.13               | 134.57                 | <b>G</b> | <b>1427.64</b> | 714.33                | 1410.62              | 705.81                 | 1409.63              | 705.32                 | <b>12</b> |
| <b>4</b>  | <b>415.18</b> | 208.09                |                      |                        | 397.17               | 199.09                 | <b>E</b> | 1370.62        | 685.81                | 1353.60              | 677.30                 | 1352.61              | 676.81                 | <b>11</b> |
| <b>5</b>  | <b>516.23</b> | 258.62                |                      |                        | 498.22               | 249.61                 | <b>T</b> | <b>1241.58</b> | 621.29                | 1224.55              | 612.78                 | 1223.57              | 612.29                 | <b>10</b> |
| <b>6</b>  | 631.26        | 316.13                |                      |                        | 613.25               | 307.13                 | <b>D</b> | <b>1140.53</b> | 570.77                | 1123.51              | 562.26                 | 1122.52              | 561.76                 | <b>9</b>  |
| <b>7</b>  | 728.31        | 364.66                |                      |                        | 710.30               | 355.65                 | <b>P</b> | <b>1025.51</b> | 513.26                | 1008.48              | 504.74                 | 1007.49              | 504.25                 | <b>8</b>  |
| <b>8</b>  | 843.34        | 422.17                |                      |                        | 825.33               | 413.17                 | <b>D</b> | <b>928.45</b>  | 464.73                | 911.43               | 456.22                 | 910.44               | 455.72                 | <b>7</b>  |
| <b>9</b>  | 956.42        | 478.71                |                      |                        | 938.41               | 469.71                 | <b>I</b> | <b>813.43</b>  | 407.22                | 796.40               | 398.70                 | 795.41               | 398.21                 | <b>6</b>  |
| <b>10</b> | 1103.49       | 552.25                |                      |                        | 1085.48              | 543.24                 | <b>F</b> | <b>700.34</b>  | 350.67                | 683.31               | 342.16                 | 682.33               | 341.67                 | <b>5</b>  |
| <b>11</b> | 1266.55       | 633.78                |                      |                        | 1248.54              | 624.77                 | <b>Y</b> | <b>553.27</b>  | 277.14                | 536.25               | 268.63                 | 535.26               | 268.13                 | <b>4</b>  |
| <b>12</b> | 1367.60       | 684.30                |                      |                        | 1349.59              | 675.30                 | <b>T</b> | <b>390.21</b>  | 195.61                | 373.18               | 187.10                 | 372.20               | 186.60                 | <b>3</b>  |
| <b>13</b> | 1481.64       | 741.33                | 1464.62              | 732.81                 | 1463.63              | 732.32                 | <b>N</b> | 289.16         | 145.08                | 272.14               | 136.57                 |                      |                        | <b>2</b>  |
| <b>14</b> |               |                       |                      |                        |                      |                        | <b>R</b> | 175.12         | 88.06                 | 158.09               | 79.55                  |                      |                        | <b>1</b>  |

MS/MS Fragmentation of ID397 **TTFPALQNVQSALIK**

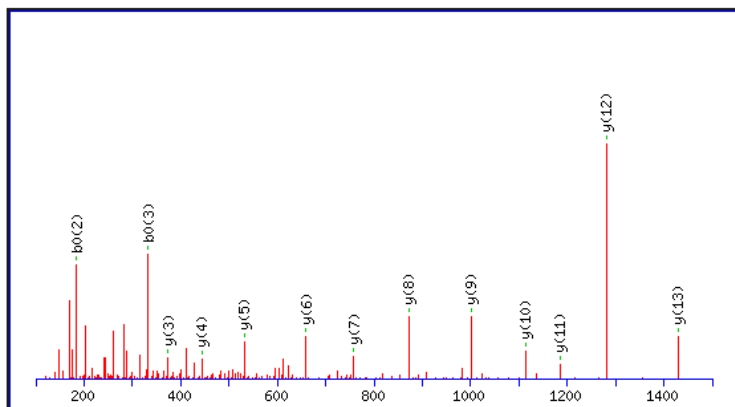

| #         | b       | b <sup>++</sup> | b*      | b <sup>*++</sup> | b <sup>0</sup> | b <sup>0++</sup> | Seq.     | y              | y <sup>++</sup> | y*      | y <sup>*++</sup> | y <sup>0</sup> | y <sup>0++</sup> | #         |
|-----------|---------|-----------------|---------|------------------|----------------|------------------|----------|----------------|-----------------|---------|------------------|----------------|------------------|-----------|
| <b>1</b>  | 102.05  | 51.53           |         |                  | 84.04          | 42.53            | <b>T</b> |                |                 |         |                  |                |                  | <b>15</b> |
| <b>2</b>  | 203.10  | 102.05          |         |                  | <b>185.09</b>  | 93.05            | <b>T</b> | 1529.87        | 765.44          | 1512.84 | 756.92           | 1511.86        | 756.43           | <b>14</b> |
| <b>3</b>  | 350.17  | 175.59          |         |                  | <b>332.16</b>  | 166.58           | <b>F</b> | <b>1428.82</b> | 714.91          | 1411.79 | 706.40           | 1410.81        | 705.91           | <b>13</b> |
| <b>4</b>  | 447.22  | 224.12          |         |                  | 429.21         | 215.11           | <b>P</b> | <b>1281.75</b> | 641.38          | 1264.73 | 632.87           | 1263.74        | 632.37           | <b>12</b> |
| <b>5</b>  | 518.26  | 259.63          |         |                  | 500.25         | 250.63           | <b>A</b> | <b>1184.70</b> | 592.85          | 1167.67 | 584.34           | 1166.69        | 583.85           | <b>11</b> |
| <b>6</b>  | 631.34  | 316.18          |         |                  | 613.33         | 307.17           | <b>L</b> | <b>1113.66</b> | 557.33          | 1096.64 | 548.82           | 1095.65        | 548.33           | <b>10</b> |
| <b>7</b>  | 759.40  | 380.21          | 742.38  | 371.69           | 741.39         | 371.20           | <b>Q</b> | <b>1000.58</b> | 500.79          | 983.55  | 492.28           | 982.57         | 491.79           | <b>9</b>  |
| <b>8</b>  | 873.45  | 437.23          | 856.42  | 428.71           | 855.44         | 428.22           | <b>N</b> | <b>872.52</b>  | 436.76          | 855.49  | 428.25           | 854.51         | 427.76           | <b>8</b>  |
| <b>9</b>  | 972.51  | 486.76          | 955.49  | 478.25           | 954.50         | 477.76           | <b>V</b> | <b>758.48</b>  | 379.74          | 741.45  | 371.23           | 740.47         | 370.74           | <b>7</b>  |
| <b>10</b> | 1100.57 | 550.79          | 1083.55 | 542.28           | 1082.56        | 541.79           | <b>Q</b> | <b>659.41</b>  | 330.21          | 642.38  | 321.69           | 641.40         | 321.20           | <b>6</b>  |
| <b>11</b> | 1187.61 | 594.31          | 1170.58 | 585.79           | 1169.59        | 585.30           | <b>S</b> | <b>531.35</b>  | 266.18          | 514.32  | 257.67           | 513.34         | 257.17           | <b>5</b>  |
| <b>12</b> | 1258.64 | 629.82          | 1241.62 | 621.31           | 1240.63        | 620.82           | <b>A</b> | <b>444.32</b>  | 222.66          | 427.29  | 214.15           |                |                  | <b>4</b>  |
| <b>13</b> | 1371.73 | 686.37          | 1354.70 | 677.85           | 1353.72        | 677.36           | <b>L</b> | <b>373.28</b>  | 187.14          | 356.25  | 178.63           |                |                  | <b>3</b>  |
| <b>14</b> | 1484.81 | 742.91          | 1467.78 | 734.40           | 1466.80        | 733.90           | <b>I</b> | 260.20         | 130.60          | 243.17  | 122.09           |                |                  | <b>2</b>  |
| <b>15</b> |         |                 |         |                  |                |                  | <b>K</b> | 147.11         | 74.06           | 130.09  | 65.55            |                |                  | <b>1</b>  |

MS/MS Fragmentation of ID398 **TTFPALQNVQSALIK**

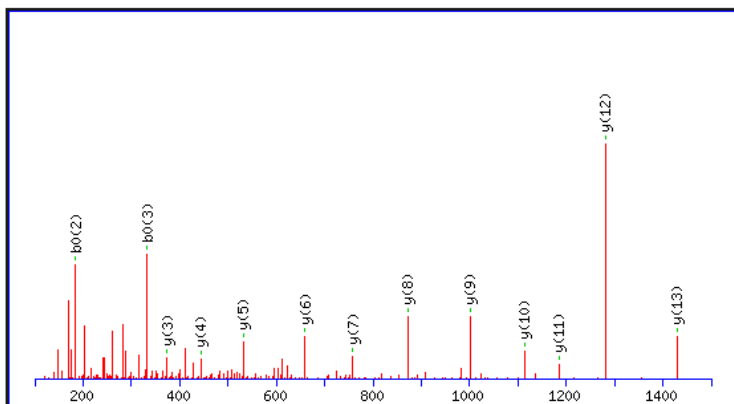

| #         | b       | b <sup>++</sup> | b <sup>*</sup> | b <sup>*++</sup> | b <sup>0</sup> | b <sup>0++</sup> | Seq.     | y              | y <sup>++</sup> | y <sup>*</sup> | y <sup>*++</sup> | y <sup>0</sup> | y <sup>0++</sup> | #         |
|-----------|---------|-----------------|----------------|------------------|----------------|------------------|----------|----------------|-----------------|----------------|------------------|----------------|------------------|-----------|
| <b>1</b>  | 102.05  | 51.53           |                |                  | 84.04          | 42.53            | <b>T</b> |                |                 |                |                  |                |                  | <b>15</b> |
| <b>2</b>  | 203.10  | 102.05          |                |                  | <b>185.09</b>  | 93.05            | <b>T</b> | 1529.87        | 765.44          | 1512.84        | 756.92           | 1511.86        | 756.43           | <b>14</b> |
| <b>3</b>  | 350.17  | 175.59          |                |                  | <b>332.16</b>  | 166.58           | <b>F</b> | <b>1428.82</b> | 714.91          | 1411.79        | 706.40           | 1410.81        | 705.91           | <b>13</b> |
| <b>4</b>  | 447.22  | 224.12          |                |                  | 429.21         | 215.11           | <b>P</b> | <b>1281.75</b> | 641.38          | 1264.73        | 632.87           | 1263.74        | 632.37           | <b>12</b> |
| <b>5</b>  | 518.26  | 259.63          |                |                  | 500.25         | 250.63           | <b>A</b> | <b>1184.70</b> | 592.85          | 1167.67        | 584.34           | 1166.69        | 583.85           | <b>11</b> |
| <b>6</b>  | 631.34  | 316.18          |                |                  | 613.33         | 307.17           | <b>L</b> | <b>1113.66</b> | 557.33          | 1096.64        | 548.82           | 1095.65        | 548.33           | <b>10</b> |
| <b>7</b>  | 759.40  | 380.21          | 742.38         | 371.69           | 741.39         | 371.20           | <b>Q</b> | <b>1000.58</b> | 500.79          | 983.55         | 492.28           | 982.57         | 491.79           | <b>9</b>  |
| <b>8</b>  | 873.45  | 437.23          | 856.42         | 428.71           | 855.44         | 428.22           | <b>N</b> | <b>872.52</b>  | 436.76          | 855.49         | 428.25           | 854.51         | 427.76           | <b>8</b>  |
| <b>9</b>  | 972.51  | 486.76          | 955.49         | 478.25           | 954.50         | 477.76           | <b>V</b> | <b>758.48</b>  | 379.74          | 741.45         | 371.23           | 740.47         | 370.74           | <b>7</b>  |
| <b>10</b> | 1100.57 | 550.79          | 1083.55        | 542.28           | 1082.56        | 541.79           | <b>Q</b> | <b>659.41</b>  | 330.21          | 642.38         | 321.69           | 641.40         | 321.20           | <b>6</b>  |
| <b>11</b> | 1187.61 | 594.31          | 1170.58        | 585.79           | 1169.59        | 585.30           | <b>S</b> | <b>531.35</b>  | 266.18          | 514.32         | 257.67           | 513.34         | 257.17           | <b>5</b>  |
| <b>12</b> | 1258.64 | 629.82          | 1241.62        | 621.31           | 1240.63        | 620.82           | <b>A</b> | <b>444.32</b>  | 222.66          | 427.29         | 214.15           |                |                  | <b>4</b>  |
| <b>13</b> | 1371.73 | 686.37          | 1354.70        | 677.85           | 1353.72        | 677.36           | <b>L</b> | <b>373.28</b>  | 187.14          | 356.25         | 178.63           |                |                  | <b>3</b>  |
| <b>14</b> | 1484.81 | 742.91          | 1467.78        | 734.40           | 1466.80        | 733.90           | <b>I</b> | 260.20         | 130.60          | 243.17         | 122.09           |                |                  | <b>2</b>  |
| <b>15</b> |         |                 |                |                  |                |                  | <b>K</b> | 147.11         | 74.06           | 130.09         | 65.55            |                |                  | <b>1</b>  |



MS/MS Fragmentation of ID400 **GGFVSNMPGDVPR**

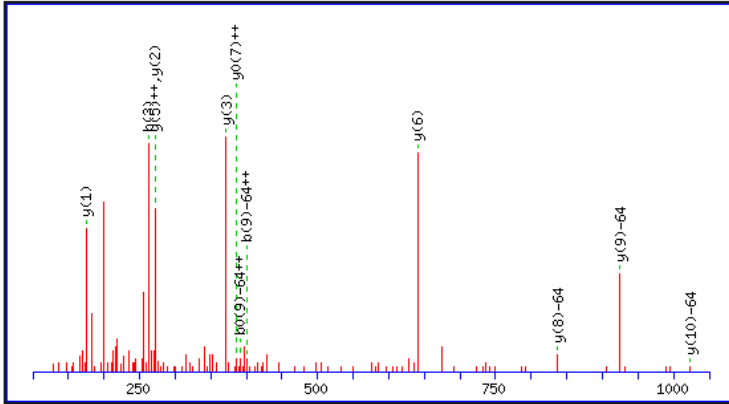

| #  | b       | b <sup>++</sup> | b <sup>*</sup> | b <sup>*++</sup> | b <sup>0</sup> | b <sup>0++</sup> | Seq. | y       | y <sup>++</sup> | y <sup>*</sup> | y <sup>*++</sup> | y <sup>0</sup> | y <sup>0++</sup> | #  |
|----|---------|-----------------|----------------|------------------|----------------|------------------|------|---------|-----------------|----------------|------------------|----------------|------------------|----|
| 1  | 58.03   | 29.52           |                |                  |                |                  | G    |         |                 |                |                  |                |                  | 13 |
| 2  | 115.05  | 58.03           |                |                  |                |                  | G    | 1227.61 | 614.31          | 1210.59        | 605.80           | 1209.60        | 605.30           | 12 |
| 3  | 262.12  | 131.56          |                |                  |                |                  | F    | 1170.59 | 585.80          | 1153.56        | 577.29           | 1152.58        | 576.79           | 11 |
| 4  | 361.19  | 181.10          |                |                  |                |                  | V    | 1023.52 | 512.26          | 1006.50        | 503.75           | 1005.51        | 503.26           | 10 |
| 5  | 448.22  | 224.61          |                |                  | 430.21         | 215.61           | S    | 924.45  | 462.73          | 907.43         | 454.22           | 906.44         | 453.73           | 9  |
| 6  | 562.26  | 281.63          | 545.24         | 273.12           | 544.25         | 272.63           | N    | 837.42  | 419.21          | 820.39         | 410.70           | 819.41         | 410.21           | 8  |
| 7  | 645.30  | 323.15          | 628.27         | 314.64           | 627.29         | 314.15           | M    | 723.38  | 362.19          | 706.35         | 353.68           | 705.37         | 353.19           | 7  |
| 8  | 742.35  | 371.68          | 725.33         | 363.17           | 724.34         | 362.67           | P    | 640.34  | 320.67          | 623.31         | 312.16           | 622.33         | 311.67           | 6  |
| 9  | 799.37  | 400.19          | 782.35         | 391.68           | 781.36         | 391.19           | G    | 543.29  | 272.15          | 526.26         | 263.63           | 525.28         | 263.14           | 5  |
| 10 | 914.40  | 457.70          | 897.37         | 449.19           | 896.39         | 448.70           | D    | 486.27  | 243.64          | 469.24         | 235.12           | 468.26         | 234.63           | 4  |
| 11 | 1013.47 | 507.24          | 996.44         | 498.72           | 995.46         | 498.23           | V    | 371.24  | 186.12          | 354.21         | 177.61           |                |                  | 3  |
| 12 | 1110.52 | 555.76          | 1093.49        | 547.25           | 1092.51        | 546.76           | P    | 272.17  | 136.59          | 255.15         | 128.08           |                |                  | 2  |
| 13 |         |                 |                |                  |                |                  | R    | 175.12  | 88.06           | 158.09         | 79.55            |                |                  | 1  |

MS/MS Fragmentation of ID401 **VATVLSIDGGGIR**

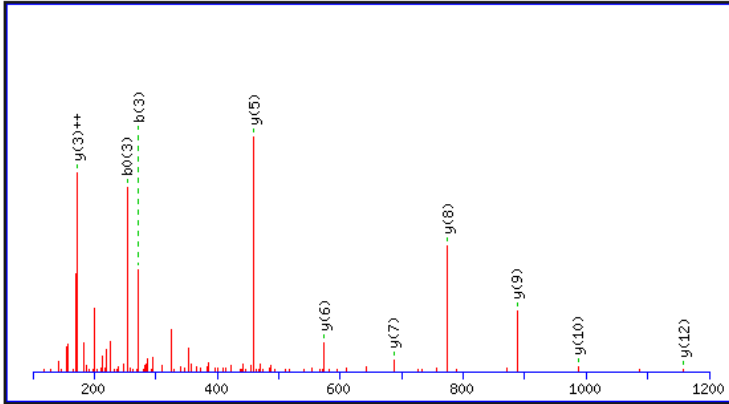

| #         | <b>b</b>      | <b>b<sup>++</sup></b> | <b>b<sup>0</sup></b> | <b>b<sup>0++</sup></b> | Seq.     | <b>y</b>       | <b>y<sup>++</sup></b> | <b>y<sup>*</sup></b> | <b>y<sup>*++</sup></b> | <b>y<sup>0</sup></b> | <b>y<sup>0++</sup></b> | #         |
|-----------|---------------|-----------------------|----------------------|------------------------|----------|----------------|-----------------------|----------------------|------------------------|----------------------|------------------------|-----------|
| <b>1</b>  | 100.08        | 50.54                 |                      |                        | <b>V</b> |                |                       |                      |                        |                      |                        | <b>13</b> |
| <b>2</b>  | 171.11        | 86.06                 |                      |                        | <b>A</b> | <b>1158.65</b> | 579.83                | 1141.62              | 571.31                 | 1140.64              | 570.82                 | <b>12</b> |
| <b>3</b>  | <b>272.16</b> | 136.58                | <b>254.15</b>        | 127.58                 | <b>T</b> | 1087.61        | 544.31                | 1070.58              | 535.80                 | 1069.60              | 535.30                 | <b>11</b> |
| <b>4</b>  | 371.23        | 186.12                | 353.22               | 177.11                 | <b>V</b> | <b>986.56</b>  | 493.79                | 969.54               | 485.27                 | 968.55               | 484.78                 | <b>10</b> |
| <b>5</b>  | 484.31        | 242.66                | 466.30               | 233.65                 | <b>L</b> | <b>887.49</b>  | 444.25                | 870.47               | 435.74                 | 869.48               | 435.25                 | <b>9</b>  |
| <b>6</b>  | 571.34        | 286.18                | 553.33               | 277.17                 | <b>S</b> | <b>774.41</b>  | 387.71                | 757.38               | 379.20                 | 756.40               | 378.70                 | <b>8</b>  |
| <b>7</b>  | 684.43        | 342.72                | 666.42               | 333.71                 | <b>I</b> | <b>687.38</b>  | 344.19                | 670.35               | 335.68                 | 669.37               | 335.19                 | <b>7</b>  |
| <b>8</b>  | 799.46        | 400.23                | 781.45               | 391.23                 | <b>D</b> | <b>574.29</b>  | 287.65                | 557.27               | 279.14                 | 556.28               | 278.65                 | <b>6</b>  |
| <b>9</b>  | 856.48        | 428.74                | 838.47               | 419.74                 | <b>G</b> | <b>459.27</b>  | 230.14                | 442.24               | 221.62                 |                      |                        | <b>5</b>  |
| <b>10</b> | 913.50        | 457.25                | 895.49               | 448.25                 | <b>G</b> | 402.25         | 201.63                | 385.22               | 193.11                 |                      |                        | <b>4</b>  |
| <b>11</b> | 970.52        | 485.76                | 952.51               | 476.76                 | <b>G</b> | 345.22         | <b>173.12</b>         | 328.20               | 164.60                 |                      |                        | <b>3</b>  |
| <b>12</b> | 1083.60       | 542.31                | 1065.59              | 533.30                 | <b>I</b> | 288.20         | 144.61                | 271.18               | 136.09                 |                      |                        | <b>2</b>  |
| <b>13</b> |               |                       |                      |                        | <b>R</b> | 175.12         | 88.06                 | 158.09               | 79.55                  |                      |                        | <b>1</b>  |

MS/MS Fragmentation of ID402 **LTVPELAVLR**

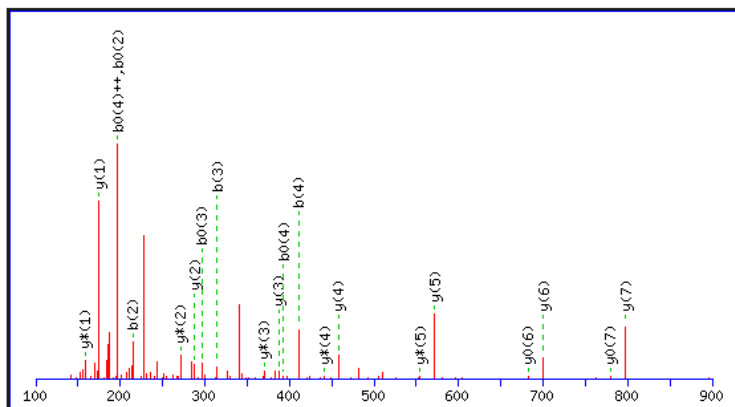

| #         | <b>b</b>      | <b>b<sup>++</sup></b> | <b>b<sup>0</sup></b> | <b>b<sup>0++</sup></b> | Seq.     | <b>y</b>      | <b>y<sup>++</sup></b> | <b>y<sup>*</sup></b> | <b>y<sup>*++</sup></b> | <b>y<sup>0</sup></b> | <b>y<sup>0++</sup></b> | #         |
|-----------|---------------|-----------------------|----------------------|------------------------|----------|---------------|-----------------------|----------------------|------------------------|----------------------|------------------------|-----------|
| <b>1</b>  | 114.09        | 57.55                 |                      |                        | <b>L</b> |               |                       |                      |                        |                      |                        | <b>10</b> |
| <b>2</b>  | <b>215.14</b> | 108.07                | <b>197.13</b>        | 99.07                  | <b>T</b> | 997.60        | 499.31                | 980.58               | 490.79                 | 979.59               | 490.30                 | <b>9</b>  |
| <b>3</b>  | <b>314.21</b> | 157.61                | <b>296.20</b>        | 148.60                 | <b>V</b> | 896.56        | 448.78                | 879.53               | 440.27                 | 878.55               | 439.78                 | <b>8</b>  |
| <b>4</b>  | <b>411.26</b> | 206.13                | <b>393.25</b>        | <b>197.13</b>          | <b>P</b> | <b>797.49</b> | 399.25                | 780.46               | 390.73                 | <b>779.48</b>        | 390.24                 | <b>7</b>  |
| <b>5</b>  | 540.30        | 270.66                | 522.29               | 261.65                 | <b>E</b> | <b>700.44</b> | 350.72                | 683.41               | 342.21                 | <b>682.42</b>        | 341.72                 | <b>6</b>  |
| <b>6</b>  | 653.39        | 327.20                | 635.38               | 318.19                 | <b>L</b> | <b>571.39</b> | 286.20                | <b>554.37</b>        | 277.69                 |                      |                        | <b>5</b>  |
| <b>7</b>  | 724.42        | 362.72                | 706.41               | 353.71                 | <b>A</b> | <b>458.31</b> | 229.66                | <b>441.28</b>        | 221.14                 |                      |                        | <b>4</b>  |
| <b>8</b>  | 823.49        | 412.25                | 805.48               | 403.24                 | <b>V</b> | <b>387.27</b> | 194.14                | <b>370.24</b>        | 185.63                 |                      |                        | <b>3</b>  |
| <b>9</b>  | 936.58        | 468.79                | 918.57               | 459.79                 | <b>L</b> | <b>288.20</b> | 144.61                | <b>271.18</b>        | 136.09                 |                      |                        | <b>2</b>  |
| <b>10</b> |               |                       |                      |                        | <b>R</b> | <b>175.12</b> | 88.06                 | <b>158.09</b>        | 79.55                  |                      |                        | <b>1</b>  |

MS/MS Fragmentation of ID403 **YLFGDNNPPLDLK**

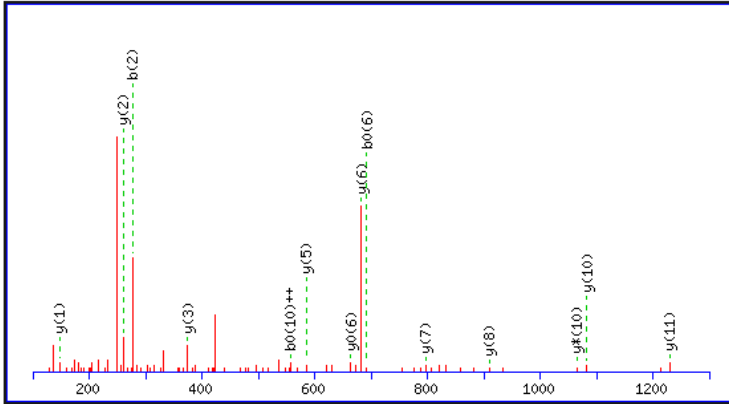

| #         | b             | b <sup>++</sup> | b*      | b <sup>*++</sup> | b <sup>0</sup> | b <sup>0++</sup> | Seq.     | y              | y <sup>++</sup> | y*             | y <sup>*++</sup> | y <sup>0</sup> | y <sup>0++</sup> | #         |
|-----------|---------------|-----------------|---------|------------------|----------------|------------------|----------|----------------|-----------------|----------------|------------------|----------------|------------------|-----------|
| <b>1</b>  | 164.07        | 82.54           |         |                  |                |                  | <b>Y</b> |                |                 |                |                  |                |                  | <b>13</b> |
| <b>2</b>  | <b>277.15</b> | 139.08          |         |                  |                |                  | <b>L</b> | 1342.70        | 671.85          | 1325.67        | 663.34           | 1324.69        | 662.85           | <b>12</b> |
| <b>3</b>  | 424.22        | 212.62          |         |                  |                |                  | <b>F</b> | <b>1229.62</b> | 615.31          | 1212.59        | 606.80           | 1211.61        | 606.31           | <b>11</b> |
| <b>4</b>  | 481.24        | 241.13          |         |                  |                |                  | <b>G</b> | <b>1082.55</b> | 541.78          | <b>1065.52</b> | 533.26           | 1064.54        | 532.77           | <b>10</b> |
| <b>5</b>  | 596.27        | 298.64          |         |                  | 578.26         | 289.63           | <b>D</b> | 1025.53        | 513.27          | 1008.50        | 504.75           | 1007.52        | 504.26           | <b>9</b>  |
| <b>6</b>  | 710.31        | 355.66          | 693.29  | 347.15           | <b>692.30</b>  | 346.66           | <b>N</b> | <b>910.50</b>  | 455.75          | 893.47         | 447.24           | 892.49         | 446.75           | <b>8</b>  |
| <b>7</b>  | 824.36        | 412.68          | 807.33  | 404.17           | 806.35         | 403.68           | <b>N</b> | <b>796.46</b>  | 398.73          | 779.43         | 390.22           | 778.45         | 389.73           | <b>7</b>  |
| <b>8</b>  | 921.41        | 461.21          | 904.38  | 452.70           | 903.40         | 452.20           | <b>P</b> | <b>682.41</b>  | 341.71          | 665.39         | 333.20           | <b>664.40</b>  | 332.71           | <b>6</b>  |
| <b>9</b>  | 1018.46       | 509.74          | 1001.44 | 501.22           | 1000.45        | 500.73           | <b>P</b> | <b>585.36</b>  | 293.18          | 568.33         | 284.67           | 567.35         | 284.18           | <b>5</b>  |
| <b>10</b> | 1131.55       | 566.28          | 1114.52 | 557.76           | 1113.54        | <b>557.27</b>    | <b>L</b> | 488.31         | 244.66          | 471.28         | 236.14           | 470.30         | 235.65           | <b>4</b>  |
| <b>11</b> | 1246.57       | 623.79          | 1229.55 | 615.28           | 1228.56        | 614.79           | <b>D</b> | <b>375.22</b>  | 188.12          | 358.20         | 179.60           | 357.21         | 179.11           | <b>3</b>  |
| <b>12</b> | 1359.66       | 680.33          | 1342.63 | 671.82           | 1341.65        | 671.33           | <b>L</b> | <b>260.20</b>  | 130.60          | 243.17         | 122.09           |                |                  | <b>2</b>  |
| <b>13</b> |               |                 |         |                  |                |                  | <b>K</b> | <b>147.11</b>  | 74.06           | 130.09         | 65.55            |                |                  | <b>1</b>  |

MS/MS Fragmentation of ID404 **IQPLIPTSK**

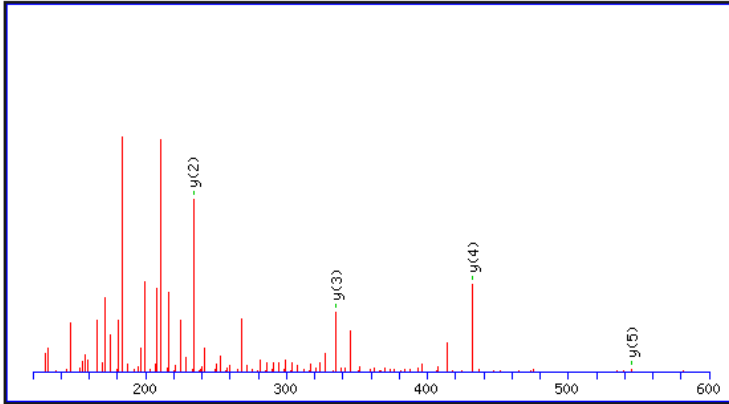

| #        | <b>b</b> | <b>b<sup>++</sup></b> | <b>b<sup>*</sup></b> | <b>b<sup>*++</sup></b> | <b>b<sup>0</sup></b> | <b>b<sup>0++</sup></b> | Seq.     | <b>y</b>      | <b>y<sup>++</sup></b> | <b>y<sup>*</sup></b> | <b>y<sup>*++</sup></b> | <b>y<sup>0</sup></b> | <b>y<sup>0++</sup></b> | #        |
|----------|----------|-----------------------|----------------------|------------------------|----------------------|------------------------|----------|---------------|-----------------------|----------------------|------------------------|----------------------|------------------------|----------|
| <b>1</b> | 114.09   | 57.55                 |                      |                        |                      |                        | <b>I</b> |               |                       |                      |                        |                      |                        | <b>9</b> |
| <b>2</b> | 242.15   | 121.58                | 225.12               | 113.07                 |                      |                        | <b>Q</b> | 883.52        | 442.27                | 866.50               | 433.75                 | 865.51               | 433.26                 | <b>8</b> |
| <b>3</b> | 339.20   | 170.10                | 322.18               | 161.59                 |                      |                        | <b>P</b> | 755.47        | 378.24                | 738.44               | 369.72                 | 737.46               | 369.23                 | <b>7</b> |
| <b>4</b> | 452.29   | 226.65                | 435.26               | 218.13                 |                      |                        | <b>L</b> | 658.41        | 329.71                | 641.39               | 321.20                 | 640.40               | 320.71                 | <b>6</b> |
| <b>5</b> | 565.37   | 283.19                | 548.34               | 274.68                 |                      |                        | <b>I</b> | <b>545.33</b> | 273.17                | 528.30               | 264.66                 | 527.32               | 264.16                 | <b>5</b> |
| <b>6</b> | 662.42   | 331.72                | 645.40               | 323.20                 |                      |                        | <b>P</b> | <b>432.25</b> | 216.63                | 415.22               | 208.11                 | 414.23               | 207.62                 | <b>4</b> |
| <b>7</b> | 763.47   | 382.24                | 746.44               | 373.73                 | 745.46               | 373.23                 | <b>T</b> | <b>335.19</b> | 168.10                | 318.17               | 159.59                 | 317.18               | 159.09                 | <b>3</b> |
| <b>8</b> | 850.50   | 425.76                | 833.48               | 417.24                 | 832.49               | 416.75                 | <b>S</b> | <b>234.14</b> | 117.58                | 217.12               | 109.06                 | 216.13               | 108.57                 | <b>2</b> |
| <b>9</b> |          |                       |                      |                        |                      |                        | <b>K</b> | 147.11        | 74.06                 | 130.09               | 65.55                  |                      |                        | <b>1</b> |

MS/MS Fragmentation of ID406 **VLMLVWDDR**

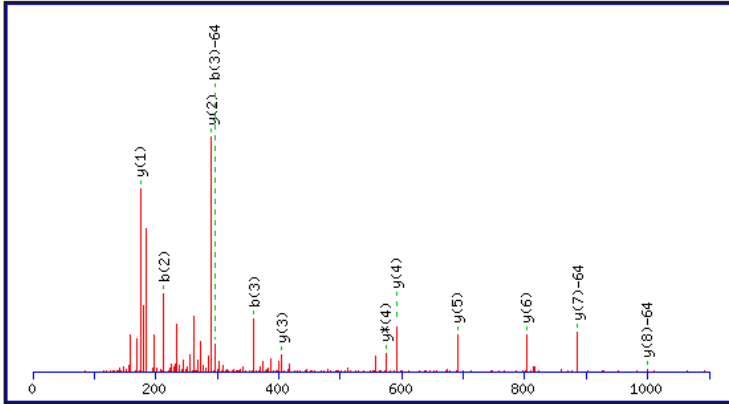

| #        | <b>b</b>      | <b>b<sup>++</sup></b> | <b>b<sup>0</sup></b> | <b>b<sup>0++</sup></b> | <b>Seq.</b> | <b>y</b>      | <b>y<sup>++</sup></b> | <b>y<sup>*</sup></b> | <b>y<sup>***</sup></b> | <b>y<sup>0</sup></b> | <b>y<sup>0++</sup></b> | #        |
|----------|---------------|-----------------------|----------------------|------------------------|-------------|---------------|-----------------------|----------------------|------------------------|----------------------|------------------------|----------|
| <b>1</b> | 100.08        | 50.54                 |                      |                        | <b>V</b>    |               |                       |                      |                        |                      |                        | <b>9</b> |
| <b>2</b> | <b>213.16</b> | 107.08                |                      |                        | <b>L</b>    | <b>999.53</b> | 500.27                | 982.50               | 491.75                 | 981.52               | 491.26                 | <b>8</b> |
| <b>3</b> | <b>296.20</b> | 148.60                |                      |                        | <b>M</b>    | <b>886.44</b> | 443.72                | 869.42               | 435.21                 | 868.43               | 434.72                 | <b>7</b> |
| <b>4</b> | 409.28        | 205.14                |                      |                        | <b>L</b>    | <b>803.40</b> | 402.21                | 786.38               | 393.69                 | 785.39               | 393.20                 | <b>6</b> |
| <b>5</b> | 508.35        | 254.68                |                      |                        | <b>V</b>    | <b>690.32</b> | 345.66                | 673.29               | 337.15                 | 672.31               | 336.66                 | <b>5</b> |
| <b>6</b> | 694.43        | 347.72                |                      |                        | <b>W</b>    | <b>591.25</b> | 296.13                | <b>574.23</b>        | 287.62                 | 573.24               | 287.12                 | <b>4</b> |
| <b>7</b> | 809.46        | 405.23                | 791.45               | 396.23                 | <b>D</b>    | <b>405.17</b> | 203.09                | 388.15               | 194.58                 | 387.16               | 194.08                 | <b>3</b> |
| <b>8</b> | 924.48        | 462.74                | 906.47               | 453.74                 | <b>D</b>    | <b>290.15</b> | 145.58                | 273.12               | 137.06                 | 272.14               | 136.57                 | <b>2</b> |
| <b>9</b> |               |                       |                      |                        | <b>R</b>    | <b>175.12</b> | 88.06                 | 158.09               | 79.55                  |                      |                        | <b>1</b> |

MS/MS Fragmentation of ID407 **VLLLVWDDR**

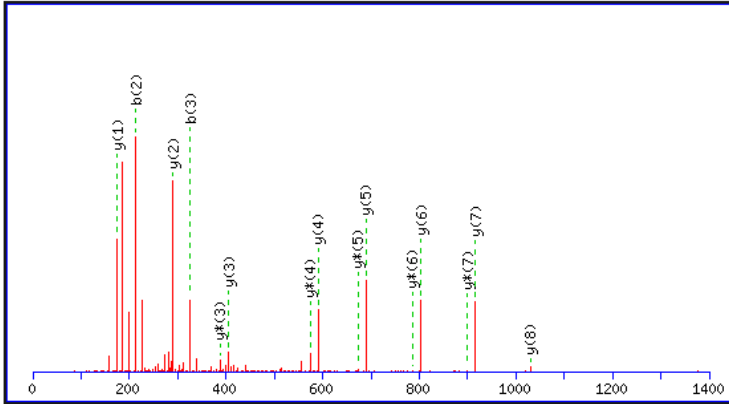

| #        | <b>b</b>      | <b>b<sup>++</sup></b> | <b>b<sup>0</sup></b> | <b>b<sup>0++</sup></b> | <b>Seq.</b> | <b>y</b>       | <b>y<sup>++</sup></b> | <b>y*</b>     | <b>y<sup>*++</sup></b> | <b>y<sup>0</sup></b> | <b>y<sup>0++</sup></b> | #        |
|----------|---------------|-----------------------|----------------------|------------------------|-------------|----------------|-----------------------|---------------|------------------------|----------------------|------------------------|----------|
| <b>1</b> | 100.08        | 50.54                 |                      |                        | <b>V</b>    |                |                       |               |                        |                      |                        | <b>9</b> |
| <b>2</b> | <b>213.16</b> | 107.08                |                      |                        | <b>L</b>    | <b>1029.57</b> | 515.29                | 1012.55       | 506.78                 | 1011.56              | 506.28                 | <b>8</b> |
| <b>3</b> | <b>326.24</b> | 163.63                |                      |                        | <b>L</b>    | <b>916.49</b>  | 458.75                | <b>899.46</b> | 450.23                 | 898.48               | 449.74                 | <b>7</b> |
| <b>4</b> | 439.33        | 220.17                |                      |                        | <b>L</b>    | <b>803.40</b>  | 402.21                | <b>786.38</b> | 393.69                 | 785.39               | 393.20                 | <b>6</b> |
| <b>5</b> | 538.40        | 269.70                |                      |                        | <b>V</b>    | <b>690.32</b>  | 345.66                | <b>673.29</b> | 337.15                 | 672.31               | 336.66                 | <b>5</b> |
| <b>6</b> | 724.48        | 362.74                |                      |                        | <b>W</b>    | <b>591.25</b>  | 296.13                | <b>574.23</b> | 287.62                 | 573.24               | 287.12                 | <b>4</b> |
| <b>7</b> | 839.50        | 420.25                | 821.49               | 411.25                 | <b>D</b>    | <b>405.17</b>  | 203.09                | <b>388.15</b> | 194.58                 | 387.16               | 194.08                 | <b>3</b> |
| <b>8</b> | 954.53        | 477.77                | 936.52               | 468.76                 | <b>D</b>    | <b>290.15</b>  | 145.58                | 273.12        | 137.06                 | 272.14               | 136.57                 | <b>2</b> |
| <b>9</b> |               |                       |                      |                        | <b>R</b>    | <b>175.12</b>  | 88.06                 | 158.09        | 79.55                  |                      |                        | <b>1</b> |

MS/MS Fragmentation of ID412 **ITTEGVTISQPYALK**

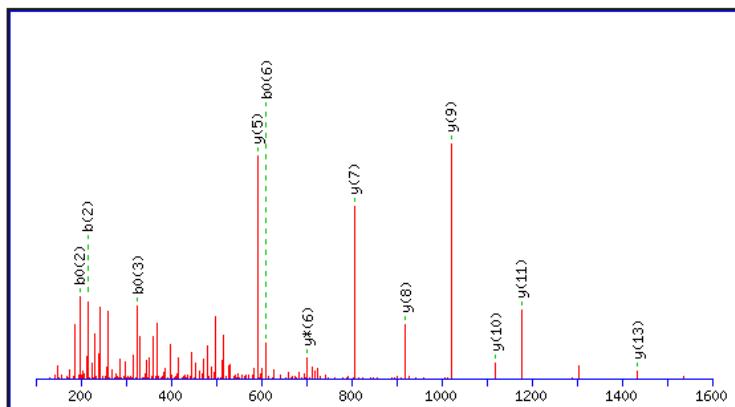

| #  | b             | b <sup>++</sup> | b <sup>*</sup> | b <sup>*++</sup> | b <sup>0</sup> | b <sup>0++</sup> | Seq. | y              | y <sup>++</sup> | y <sup>*</sup> | y <sup>*++</sup> | y <sup>0</sup> | y <sup>0++</sup> | #  |
|----|---------------|-----------------|----------------|------------------|----------------|------------------|------|----------------|-----------------|----------------|------------------|----------------|------------------|----|
| 1  | 114.09        | 57.55           |                |                  |                |                  | I    |                |                 |                |                  |                |                  | 15 |
| 2  | <b>215.14</b> | 108.07          |                |                  | <b>197.13</b>  | 99.07            | T    | 1535.80        | 768.40          | 1518.77        | 759.89           | 1517.78        | 759.40           | 14 |
| 3  | 344.18        | 172.59          |                |                  | <b>326.17</b>  | 163.59           | E    | <b>1434.75</b> | 717.88          | 1417.72        | 709.36           | 1416.74        | 708.87           | 13 |
| 4  | 473.22        | 237.12          |                |                  | 455.21         | 228.11           | E    | 1305.70        | 653.36          | 1288.68        | 644.84           | 1287.69        | 644.35           | 12 |
| 5  | 530.25        | 265.63          |                |                  | 512.24         | 256.62           | G    | <b>1176.66</b> | 588.83          | 1159.64        | 580.32           | 1158.65        | 579.83           | 11 |
| 6  | 629.31        | 315.16          |                |                  | <b>611.30</b>  | 306.16           | V    | <b>1119.64</b> | 560.32          | 1102.61        | 551.81           | 1101.63        | 551.32           | 10 |
| 7  | 730.36        | 365.68          |                |                  | 712.35         | 356.68           | T    | <b>1020.57</b> | 510.79          | 1003.55        | 502.28           | 1002.56        | 501.78           | 9  |
| 8  | 843.45        | 422.23          |                |                  | 825.44         | 413.22           | I    | <b>919.52</b>  | 460.27          | 902.50         | 451.75           | 901.51         | 451.26           | 8  |
| 9  | 930.48        | 465.74          |                |                  | 912.47         | 456.74           | S    | <b>806.44</b>  | 403.72          | 789.41         | 395.21           | 788.43         | 394.72           | 7  |
| 10 | 1058.54       | 529.77          | 1041.51        | 521.26           | 1040.53        | 520.77           | Q    | 719.41         | 360.21          | <b>702.38</b>  | 351.69           |                |                  | 6  |
| 11 | 1155.59       | 578.30          | 1138.56        | 569.78           | 1137.58        | 569.29           | P    | <b>591.35</b>  | 296.18          | 574.32         | 287.67           |                |                  | 5  |
| 12 | 1318.65       | 659.83          | 1301.63        | 651.32           | 1300.64        | 650.82           | Y    | 494.30         | 247.65          | 477.27         | 239.14           |                |                  | 4  |
| 13 | 1389.69       | 695.35          | 1372.66        | 686.84           | 1371.68        | 686.34           | A    | 331.23         | 166.12          | 314.21         | 157.61           |                |                  | 3  |
| 14 | 1502.77       | 751.89          | 1485.75        | 743.38           | 1484.76        | 742.89           | L    | 260.20         | 130.60          | 243.17         | 122.09           |                |                  | 2  |
| 15 |               |                 |                |                  |                |                  | K    | 147.11         | 74.06           | 130.09         | 65.55            |                |                  | 1  |



MS/MS Fragmentation of ID414 **TFDYFMDLLAK**

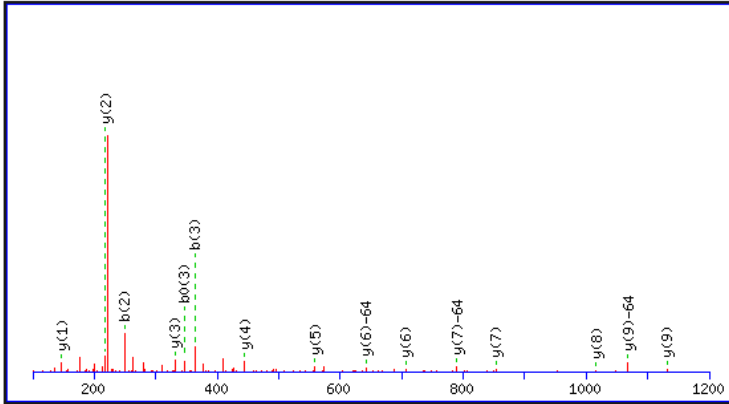

| #         | <b>b</b>      | <b>b<sup>++</sup></b> | <b>b<sup>0</sup></b> | <b>b<sup>0++</sup></b> | Seq.     | <b>y</b>       | <b>y<sup>++</sup></b> | <b>y<sup>*</sup></b> | <b>y<sup>*++</sup></b> | <b>y<sup>0</sup></b> | <b>y<sup>0++</sup></b> | #         |
|-----------|---------------|-----------------------|----------------------|------------------------|----------|----------------|-----------------------|----------------------|------------------------|----------------------|------------------------|-----------|
| <b>1</b>  | 102.05        | 51.53                 | 84.04                | 42.53                  | <b>T</b> |                |                       |                      |                        |                      |                        | <b>11</b> |
| <b>2</b>  | <b>249.12</b> | 125.07                | 231.11               | 116.06                 | <b>F</b> | 1278.61        | 639.81                | 1261.58              | 631.29                 | 1260.60              | 630.80                 | <b>10</b> |
| <b>3</b>  | <b>364.15</b> | 182.58                | <b>346.14</b>        | 173.57                 | <b>D</b> | <b>1131.54</b> | 566.27                | 1114.51              | 557.76                 | 1113.53              | 557.27                 | <b>9</b>  |
| <b>4</b>  | 527.21        | 264.11                | 509.20               | 255.11                 | <b>Y</b> | <b>1016.51</b> | 508.76                | 999.49               | 500.25                 | 998.50               | 499.75                 | <b>8</b>  |
| <b>5</b>  | 674.28        | 337.64                | 656.27               | 328.64                 | <b>F</b> | <b>853.45</b>  | 427.23                | 836.42               | 418.71                 | 835.44               | 418.22                 | <b>7</b>  |
| <b>6</b>  | 821.32        | 411.16                | 803.31               | 402.16                 | <b>M</b> | <b>706.38</b>  | 353.69                | 689.35               | 345.18                 | 688.37               | 344.69                 | <b>6</b>  |
| <b>7</b>  | 936.34        | 468.68                | 918.33               | 459.67                 | <b>D</b> | <b>559.34</b>  | 280.18                | 542.32               | 271.66                 | 541.33               | 271.17                 | <b>5</b>  |
| <b>8</b>  | 1049.43       | 525.22                | 1031.42              | 516.21                 | <b>L</b> | <b>444.32</b>  | 222.66                | 427.29               | 214.15                 |                      |                        | <b>4</b>  |
| <b>9</b>  | 1162.51       | 581.76                | 1144.50              | 572.75                 | <b>L</b> | <b>331.23</b>  | 166.12                | 314.21               | 157.61                 |                      |                        | <b>3</b>  |
| <b>10</b> | 1233.55       | 617.28                | 1215.54              | 608.27                 | <b>A</b> | <b>218.15</b>  | 109.58                | 201.12               | 101.07                 |                      |                        | <b>2</b>  |
| <b>11</b> |               |                       |                      |                        | <b>K</b> | <b>147.11</b>  | 74.06                 | 130.09               | 65.55                  |                      |                        | <b>1</b>  |

MS/MS Fragmentation of ID415 **TYDYFMDLLAK**

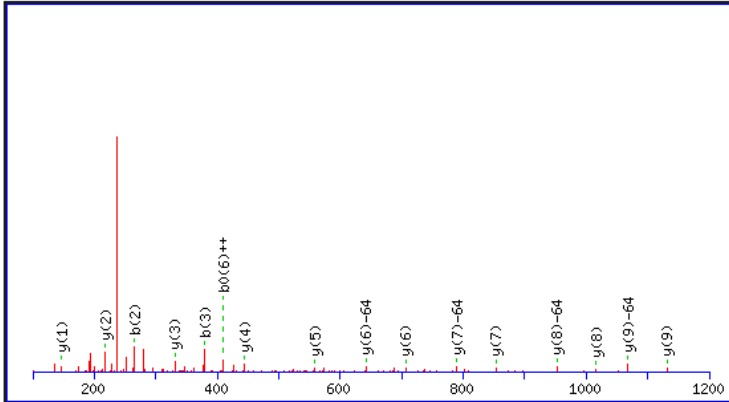

| #         | <b>b</b>      | <b>b<sup>++</sup></b> | <b>b<sup>0</sup></b> | <b>b<sup>0++</sup></b> | <b>Seq.</b> | <b>y</b>       | <b>y<sup>++</sup></b> | <b>y<sup>*</sup></b> | <b>y<sup>*++</sup></b> | <b>y<sup>0</sup></b> | <b>y<sup>0++</sup></b> | #         |
|-----------|---------------|-----------------------|----------------------|------------------------|-------------|----------------|-----------------------|----------------------|------------------------|----------------------|------------------------|-----------|
| <b>1</b>  | 102.05        | 51.53                 | 84.04                | 42.53                  | <b>T</b>    |                |                       |                      |                        |                      |                        | <b>11</b> |
| <b>2</b>  | <b>265.12</b> | 133.06                | 247.11               | 124.06                 | <b>Y</b>    | 1230.60        | 615.81                | 1213.58              | 607.29                 | 1212.59              | 606.80                 | <b>10</b> |
| <b>3</b>  | <b>380.15</b> | 190.58                | 362.13               | 181.57                 | <b>D</b>    | <b>1067.54</b> | 534.27                | 1050.51              | 525.76                 | 1049.53              | 525.27                 | <b>9</b>  |
| <b>4</b>  | 543.21        | 272.11                | 525.20               | 263.10                 | <b>Y</b>    | <b>952.51</b>  | 476.76                | 935.49               | 468.25                 | 934.50               | 467.76                 | <b>8</b>  |
| <b>5</b>  | 690.28        | 345.64                | 672.27               | 336.64                 | <b>F</b>    | <b>789.45</b>  | 395.23                | 772.42               | 386.72                 | 771.44               | 386.22                 | <b>7</b>  |
| <b>6</b>  | 773.31        | 387.16                | 755.30               | 378.16                 | <b>M</b>    | <b>642.38</b>  | 321.69                | 625.36               | 313.18                 | 624.37               | 312.69                 | <b>6</b>  |
| <b>7</b>  | 888.34        | 444.67                | 870.33               | 435.67                 | <b>D</b>    | <b>559.34</b>  | 280.18                | 542.32               | 271.66                 | 541.33               | 271.17                 | <b>5</b>  |
| <b>8</b>  | 1001.43       | 501.22                | 983.41               | 492.21                 | <b>L</b>    | <b>444.32</b>  | 222.66                | 427.29               | 214.15                 |                      |                        | <b>4</b>  |
| <b>9</b>  | 1114.51       | 557.76                | 1096.50              | 548.75                 | <b>L</b>    | <b>331.23</b>  | 166.12                | 314.21               | 157.61                 |                      |                        | <b>3</b>  |
| <b>10</b> | 1185.55       | 593.28                | 1167.54              | 584.27                 | <b>A</b>    | <b>218.15</b>  | 109.58                | 201.12               | 101.07                 |                      |                        | <b>2</b>  |
| <b>11</b> |               |                       |                      |                        | <b>K</b>    | <b>147.11</b>  | 74.06                 | 130.09               | 65.55                  |                      |                        | <b>1</b>  |

MS/MS Fragmentation of ID417 **VPDDLLEAK**

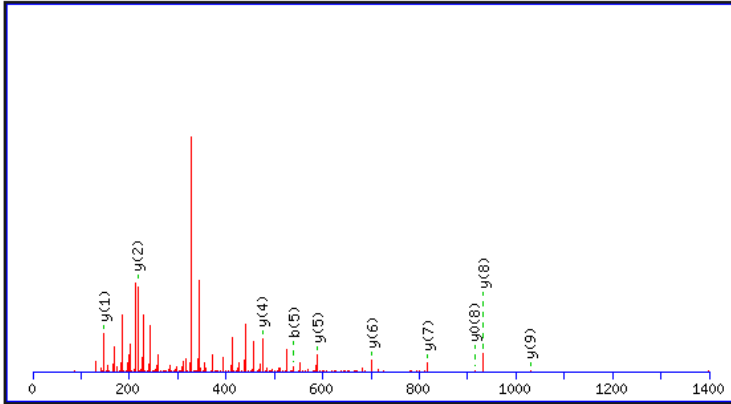

| #         | <b>b</b>      | <b>b<sup>++</sup></b> | <b>b<sup>0</sup></b> | <b>b<sup>0++</sup></b> | Seq.     | <b>y</b>       | <b>y<sup>++</sup></b> | <b>y<sup>*</sup></b> | <b>y<sup>++*</sup></b> | <b>y<sup>0</sup></b> | <b>y<sup>0++</sup></b> | #         |
|-----------|---------------|-----------------------|----------------------|------------------------|----------|----------------|-----------------------|----------------------|------------------------|----------------------|------------------------|-----------|
| <b>1</b>  | 100.08        | 50.54                 |                      |                        | <b>V</b> |                |                       |                      |                        |                      |                        | <b>10</b> |
| <b>2</b>  | 197.13        | 99.07                 |                      |                        | <b>P</b> | <b>1029.51</b> | 515.26                | 1012.48              | 506.75                 | 1011.50              | 506.25                 | <b>9</b>  |
| <b>3</b>  | 312.16        | 156.58                | 294.14               | 147.58                 | <b>D</b> | <b>932.46</b>  | 466.73                | 915.43               | 458.22                 | <b>914.45</b>        | 457.73                 | <b>8</b>  |
| <b>4</b>  | 427.18        | 214.09                | 409.17               | 205.09                 | <b>D</b> | <b>817.43</b>  | 409.22                | 800.40               | 400.71                 | 799.42               | 400.21                 | <b>7</b>  |
| <b>5</b>  | <b>540.27</b> | 270.64                | 522.26               | 261.63                 | <b>L</b> | <b>702.40</b>  | 351.71                | 685.38               | 343.19                 | 684.39               | 342.70                 | <b>6</b>  |
| <b>6</b>  | 653.35        | 327.18                | 635.34               | 318.17                 | <b>L</b> | <b>589.32</b>  | 295.16                | 572.29               | 286.65                 | 571.31               | 286.16                 | <b>5</b>  |
| <b>7</b>  | 782.39        | 391.70                | 764.38               | 382.69                 | <b>E</b> | <b>476.24</b>  | 238.62                | 459.21               | 230.11                 | 458.22               | 229.62                 | <b>4</b>  |
| <b>8</b>  | 911.44        | 456.22                | 893.43               | 447.22                 | <b>E</b> | 347.19         | 174.10                | 330.17               | 165.59                 | 329.18               | 165.09                 | <b>3</b>  |
| <b>9</b>  | 982.47        | 491.74                | 964.46               | 482.73                 | <b>A</b> | <b>218.15</b>  | 109.58                | 201.12               | 101.07                 |                      |                        | <b>2</b>  |
| <b>10</b> |               |                       |                      |                        | <b>K</b> | <b>147.11</b>  | 74.06                 | 130.09               | 65.55                  |                      |                        | <b>1</b>  |

MS/MS Fragmentation of ID421 **LFQVEYAIEAIK**

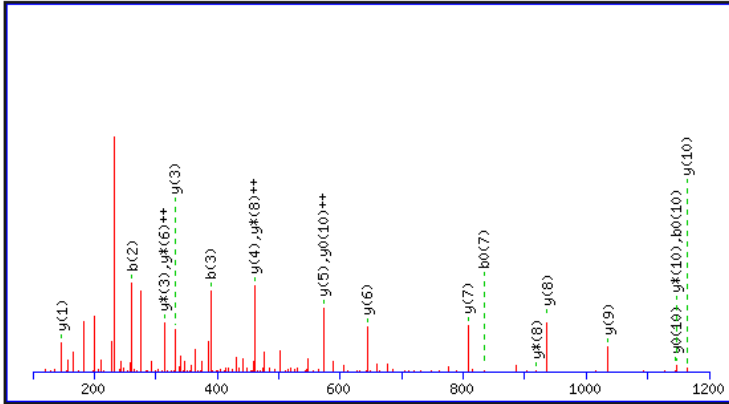

| #         | <b>b</b>      | <b>b<sup>++</sup></b> | <b>b<sup>*</sup></b> | <b>b<sup>*++</sup></b> | <b>b<sup>0</sup></b> | <b>b<sup>0++</sup></b> | Seq.     | <b>y</b>       | <b>y<sup>++</sup></b> | <b>y<sup>*</sup></b> | <b>y<sup>*++</sup></b> | <b>y<sup>0</sup></b> | <b>y<sup>0++</sup></b> | #         |
|-----------|---------------|-----------------------|----------------------|------------------------|----------------------|------------------------|----------|----------------|-----------------------|----------------------|------------------------|----------------------|------------------------|-----------|
| <b>1</b>  | 114.09        | 57.55                 |                      |                        |                      |                        | <b>L</b> |                |                       |                      |                        |                      |                        | <b>12</b> |
| <b>2</b>  | <b>261.16</b> | 131.08                |                      |                        |                      |                        | <b>F</b> | 1310.70        | 655.85                | 1293.67              | 647.34                 | 1292.69              | 646.85                 | <b>11</b> |
| <b>3</b>  | <b>389.22</b> | 195.11                | 372.19               | 186.60                 |                      |                        | <b>Q</b> | <b>1163.63</b> | 582.32                | <b>1146.60</b>       | 573.81                 | <b>1145.62</b>       | <b>573.31</b>          | <b>10</b> |
| <b>4</b>  | 488.29        | 244.65                | 471.26               | 236.13                 |                      |                        | <b>V</b> | <b>1035.57</b> | 518.29                | 1018.55              | 509.78                 | 1017.56              | 509.28                 | <b>9</b>  |
| <b>5</b>  | 617.33        | 309.17                | 600.30               | 300.66                 | 599.32               | 300.16                 | <b>E</b> | <b>936.50</b>  | 468.76                | <b>919.48</b>        | <b>460.24</b>          | 918.49               | 459.75                 | <b>8</b>  |
| <b>6</b>  | 780.39        | 390.70                | 763.37               | 382.19                 | 762.38               | 381.69                 | <b>Y</b> | <b>807.46</b>  | 404.23                | 790.43               | 395.72                 | 789.45               | 395.23                 | <b>7</b>  |
| <b>7</b>  | 851.43        | 426.22                | 834.40               | 417.71                 | <b>833.42</b>        | 417.21                 | <b>A</b> | <b>644.40</b>  | 322.70                | 627.37               | <b>314.19</b>          | 626.39               | 313.70                 | <b>6</b>  |
| <b>8</b>  | 964.51        | 482.76                | 947.49               | 474.25                 | 946.50               | 473.76                 | <b>I</b> | <b>573.36</b>  | 287.18                | 556.33               | 278.67                 | 555.35               | 278.18                 | <b>5</b>  |
| <b>9</b>  | 1093.56       | 547.28                | 1076.53              | 538.77                 | 1075.55              | 538.28                 | <b>E</b> | <b>460.28</b>  | 230.64                | 443.25               | 222.13                 | 442.27               | 221.64                 | <b>4</b>  |
| <b>10</b> | 1164.59       | 582.80                | 1147.57              | 574.29                 | <b>1146.58</b>       | 573.80                 | <b>A</b> | <b>331.23</b>  | 166.12                | <b>314.21</b>        | 157.61                 |                      |                        | <b>3</b>  |
| <b>11</b> | 1277.68       | 639.34                | 1260.65              | 630.83                 | 1259.67              | 630.34                 | <b>I</b> | 260.20         | 130.60                | 243.17               | 122.09                 |                      |                        | <b>2</b>  |
| <b>12</b> |               |                       |                      |                        |                      |                        | <b>K</b> | <b>147.11</b>  | 74.06                 | 130.09               | 65.55                  |                      |                        | <b>1</b>  |

MS/MS Fragmentation of ID423 **LVVAPPNFVIK**

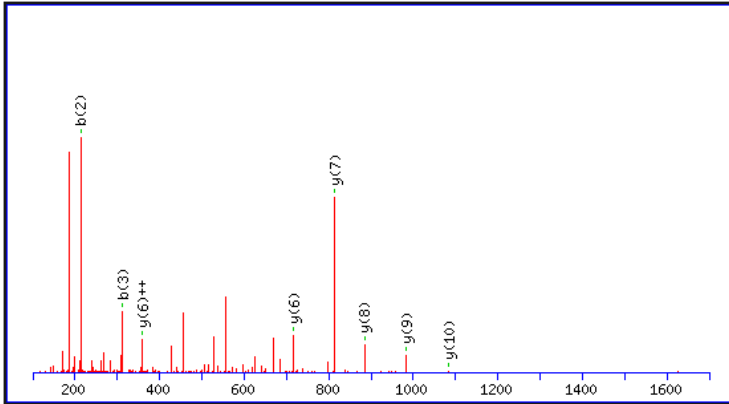

| #         | <b>b</b>      | <b>b<sup>++</sup></b> | <b>b<sup>*</sup></b> | <b>b<sup>*++</sup></b> | Seq.     | <b>y</b>       | <b>y<sup>++</sup></b> | <b>y<sup>*</sup></b> | <b>y<sup>*++</sup></b> | #         |
|-----------|---------------|-----------------------|----------------------|------------------------|----------|----------------|-----------------------|----------------------|------------------------|-----------|
| <b>1</b>  | 114.09        | 57.55                 |                      |                        | <b>L</b> |                |                       |                      |                        | <b>11</b> |
| <b>2</b>  | <b>213.16</b> | 107.08                |                      |                        | <b>V</b> | <b>1083.66</b> | 542.33                | 1066.63              | 533.82                 | <b>10</b> |
| <b>3</b>  | <b>312.23</b> | 156.62                |                      |                        | <b>V</b> | <b>984.59</b>  | 492.80                | 967.56               | 484.28                 | <b>9</b>  |
| <b>4</b>  | 383.27        | 192.14                |                      |                        | <b>A</b> | <b>885.52</b>  | 443.26                | 868.49               | 434.75                 | <b>8</b>  |
| <b>5</b>  | 480.32        | 240.66                |                      |                        | <b>P</b> | <b>814.48</b>  | 407.74                | 797.46               | 399.23                 | <b>7</b>  |
| <b>6</b>  | 577.37        | 289.19                |                      |                        | <b>P</b> | <b>717.43</b>  | <b>359.22</b>         | 700.40               | 350.71                 | <b>6</b>  |
| <b>7</b>  | 691.41        | 346.21                | 674.39               | 337.70                 | <b>N</b> | 620.38         | 310.69                | 603.35               | 302.18                 | <b>5</b>  |
| <b>8</b>  | 838.48        | 419.74                | 821.46               | 411.23                 | <b>F</b> | 506.33         | 253.67                | 489.31               | 245.16                 | <b>4</b>  |
| <b>9</b>  | 937.55        | 469.28                | 920.52               | 460.77                 | <b>V</b> | 359.27         | 180.14                | 342.24               | 171.62                 | <b>3</b>  |
| <b>10</b> | 1050.63       | 525.82                | 1033.61              | 517.31                 | <b>I</b> | 260.20         | 130.60                | 243.17               | 122.09                 | <b>2</b>  |
| <b>11</b> |               |                       |                      |                        | <b>K</b> | 147.11         | 74.06                 | 130.09               | 65.55                  | <b>1</b>  |

MS/MS Fragmentation of ID424 **VQFTEYIQK**

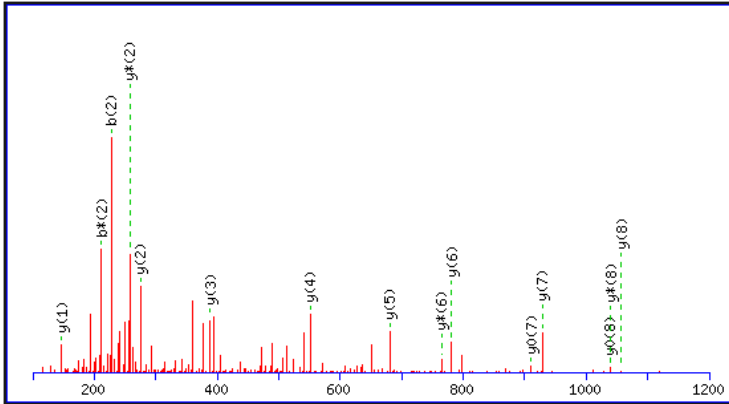

| #        | <b>b</b>      | <b>b<sup>++</sup></b> | <b>b*</b>     | <b>b<sup>*++</sup></b> | <b>b<sup>0</sup></b> | <b>b<sup>0++</sup></b> | Seq.     | <b>y</b>       | <b>y<sup>++</sup></b> | <b>y*</b>      | <b>y<sup>*++</sup></b> | <b>y<sup>0</sup></b> | <b>y<sup>0++</sup></b> | #        |
|----------|---------------|-----------------------|---------------|------------------------|----------------------|------------------------|----------|----------------|-----------------------|----------------|------------------------|----------------------|------------------------|----------|
| <b>1</b> | 100.08        | 50.54                 |               |                        |                      |                        | <b>V</b> |                |                       |                |                        |                      |                        | <b>9</b> |
| <b>2</b> | <b>228.13</b> | 114.57                | <b>211.11</b> | 106.06                 |                      |                        | <b>Q</b> | <b>1056.54</b> | 528.77                | <b>1039.51</b> | 520.26                 | <b>1038.53</b>       | 519.77                 | <b>8</b> |
| <b>3</b> | 375.20        | 188.10                | 358.18        | 179.59                 |                      |                        | <b>F</b> | <b>928.48</b>  | 464.74                | 911.45         | 456.23                 | <b>910.47</b>        | 455.74                 | <b>7</b> |
| <b>4</b> | 476.25        | 238.63                | 459.22        | 230.12                 | 458.24               | 229.62                 | <b>T</b> | <b>781.41</b>  | 391.21                | <b>764.38</b>  | 382.69                 | 763.40               | 382.20                 | <b>6</b> |
| <b>5</b> | 605.29        | 303.15                | 588.27        | 294.64                 | 587.28               | 294.14                 | <b>E</b> | <b>680.36</b>  | 340.68                | 663.33         | 332.17                 | 662.35               | 331.68                 | <b>5</b> |
| <b>6</b> | 768.36        | 384.68                | 751.33        | 376.17                 | 750.35               | 375.68                 | <b>Y</b> | <b>551.32</b>  | 276.16                | 534.29         | 267.65                 |                      |                        | <b>4</b> |
| <b>7</b> | 881.44        | 441.22                | 864.41        | 432.71                 | 863.43               | 432.22                 | <b>I</b> | <b>388.26</b>  | 194.63                | 371.23         | 186.12                 |                      |                        | <b>3</b> |
| <b>8</b> | 1009.50       | 505.25                | 992.47        | 496.74                 | 991.49               | 496.25                 | <b>Q</b> | <b>275.17</b>  | 138.09                | <b>258.14</b>  | 129.58                 |                      |                        | <b>2</b> |
| <b>9</b> |               |                       |               |                        |                      |                        | <b>K</b> | <b>147.11</b>  | 74.06                 | 130.09         | 65.55                  |                      |                        | <b>1</b> |

MS/MS Fragmentation of ID425 **GILLFGPPGTGK**

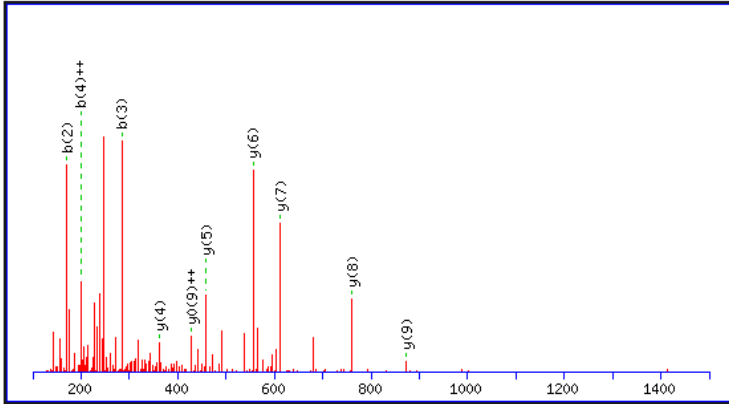

| #         | <b>b</b>      | <b>b<sup>++</sup></b> | <b>b<sup>0</sup></b> | <b>b<sup>0++</sup></b> | Seq.     | <b>y</b>      | <b>y<sup>++</sup></b> | <b>y<sup>*</sup></b> | <b>y<sup>*++</sup></b> | <b>y<sup>0</sup></b> | <b>y<sup>0++</sup></b> | #         |
|-----------|---------------|-----------------------|----------------------|------------------------|----------|---------------|-----------------------|----------------------|------------------------|----------------------|------------------------|-----------|
| <b>1</b>  | 58.03         | 29.52                 |                      |                        | <b>G</b> |               |                       |                      |                        |                      |                        | <b>12</b> |
| <b>2</b>  | <b>171.11</b> | 86.06                 |                      |                        | <b>I</b> | 1099.65       | 550.33                | 1082.62              | 541.82                 | 1081.64              | 541.32                 | <b>11</b> |
| <b>3</b>  | <b>284.20</b> | 142.60                |                      |                        | <b>L</b> | 986.57        | 493.79                | 969.54               | 485.27                 | 968.56               | 484.78                 | <b>10</b> |
| <b>4</b>  | 397.28        | <b>199.14</b>         |                      |                        | <b>L</b> | <b>873.48</b> | 437.25                | 856.46               | 428.73                 | 855.47               | <b>428.24</b>          | <b>9</b>  |
| <b>5</b>  | 544.35        | 272.68                |                      |                        | <b>F</b> | <b>760.40</b> | 380.70                | 743.37               | 372.19                 | 742.39               | 371.70                 | <b>8</b>  |
| <b>6</b>  | 601.37        | 301.19                |                      |                        | <b>G</b> | <b>613.33</b> | 307.17                | 596.30               | 298.66                 | 595.32               | 298.16                 | <b>7</b>  |
| <b>7</b>  | 698.42        | 349.72                |                      |                        | <b>P</b> | <b>556.31</b> | 278.66                | 539.28               | 270.14                 | 538.30               | 269.65                 | <b>6</b>  |
| <b>8</b>  | 795.48        | 398.24                |                      |                        | <b>P</b> | <b>459.26</b> | 230.13                | 442.23               | 221.62                 | 441.25               | 221.13                 | <b>5</b>  |
| <b>9</b>  | 852.50        | 426.75                |                      |                        | <b>G</b> | <b>362.20</b> | 181.61                | 345.18               | 173.09                 | 344.19               | 172.60                 | <b>4</b>  |
| <b>10</b> | 953.55        | 477.28                | 935.53               | 468.27                 | <b>T</b> | 305.18        | 153.09                | 288.16               | 144.58                 | 287.17               | 144.09                 | <b>3</b>  |
| <b>11</b> | 1010.57       | 505.79                | 992.56               | 496.78                 | <b>G</b> | 204.13        | 102.57                | 187.11               | 94.06                  |                      |                        | <b>2</b>  |
| <b>12</b> |               |                       |                      |                        | <b>K</b> | 147.11        | 74.06                 | 130.09               | 65.55                  |                      |                        | <b>1</b>  |

MS/MS Fragmentation of ID432 **TVTINSEGVSR**

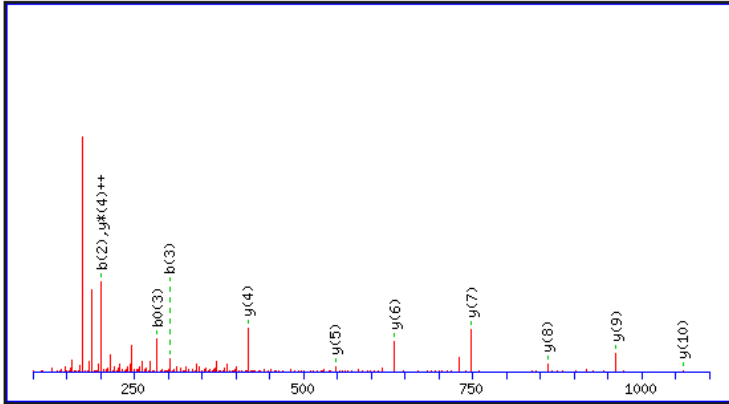

| #         | <b>b</b>      | <b>b<sup>++</sup></b> | <b>b<sup>*</sup></b> | <b>b<sup>*++</sup></b> | <b>b<sup>0</sup></b> | <b>b<sup>0++</sup></b> | Seq.     | <b>y</b>       | <b>y<sup>++</sup></b> | <b>y<sup>*</sup></b> | <b>y<sup>*++</sup></b> | <b>y<sup>0</sup></b> | <b>y<sup>0++</sup></b> | #         |
|-----------|---------------|-----------------------|----------------------|------------------------|----------------------|------------------------|----------|----------------|-----------------------|----------------------|------------------------|----------------------|------------------------|-----------|
| <b>1</b>  | 102.05        | 51.53                 |                      |                        | 84.04                | 42.53                  | <b>T</b> |                |                       |                      |                        |                      |                        | <b>11</b> |
| <b>2</b>  | <b>201.12</b> | 101.07                |                      |                        | 183.11               | 92.06                  | <b>V</b> | <b>1061.56</b> | 531.28                | 1044.53              | 522.77                 | 1043.55              | 522.28                 | <b>10</b> |
| <b>3</b>  | <b>302.17</b> | 151.59                |                      |                        | <b>284.16</b>        | 142.58                 | <b>T</b> | <b>962.49</b>  | 481.75                | 945.46               | 473.24                 | 944.48               | 472.74                 | <b>9</b>  |
| <b>4</b>  | 415.26        | 208.13                |                      |                        | 397.24               | 199.13                 | <b>I</b> | <b>861.44</b>  | 431.22                | 844.42               | 422.71                 | 843.43               | 422.22                 | <b>8</b>  |
| <b>5</b>  | 529.30        | 265.15                | 512.27               | 256.64                 | 511.29               | 256.15                 | <b>N</b> | <b>748.36</b>  | 374.68                | 731.33               | 366.17                 | 730.35               | 365.68                 | <b>7</b>  |
| <b>6</b>  | 616.33        | 308.67                | 599.30               | 300.16                 | 598.32               | 299.66                 | <b>S</b> | <b>634.32</b>  | 317.66                | 617.29               | 309.15                 | 616.30               | 308.66                 | <b>6</b>  |
| <b>7</b>  | 745.37        | 373.19                | 728.35               | 364.68                 | 727.36               | 364.18                 | <b>E</b> | <b>547.28</b>  | 274.15                | 530.26               | 265.63                 | 529.27               | 265.14                 | <b>5</b>  |
| <b>8</b>  | 802.39        | 401.70                | 785.37               | 393.19                 | 784.38               | 392.70                 | <b>G</b> | <b>418.24</b>  | 209.62                | 401.21               | <b>201.11</b>          | 400.23               | 200.62                 | <b>4</b>  |
| <b>9</b>  | 901.46        | 451.23                | 884.44               | 442.72                 | 883.45               | 442.23                 | <b>V</b> | 361.22         | 181.11                | 344.19               | 172.60                 | 343.21               | 172.11                 | <b>3</b>  |
| <b>10</b> | 988.49        | 494.75                | 971.47               | 486.24                 | 970.48               | 485.75                 | <b>S</b> | 262.15         | 131.58                | 245.12               | 123.07                 | 244.14               | 122.57                 | <b>2</b>  |
| <b>11</b> |               |                       |                      |                        |                      |                        | <b>R</b> | 175.12         | 88.06                 | 158.09               | 79.55                  |                      |                        | <b>1</b>  |



MS/MS Fragmentation of ID438 **GVLIIYGGPPGTGK**

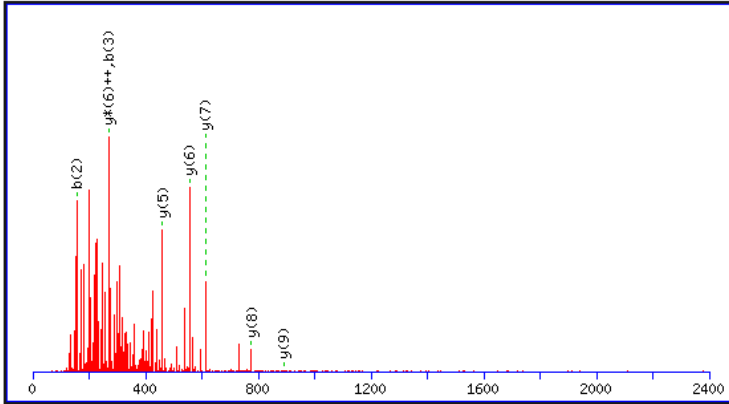

| #         | b             | b <sup>++</sup> | b <sup>0</sup> | b <sup>0++</sup> | Seq.     | y             | y <sup>++</sup> | y*      | y <sup>*++</sup> | y <sup>0</sup> | y <sup>0++</sup> | #         |
|-----------|---------------|-----------------|----------------|------------------|----------|---------------|-----------------|---------|------------------|----------------|------------------|-----------|
| <b>1</b>  | 58.03         | 29.52           |                |                  | <b>G</b> |               |                 |         |                  |                |                  | <b>12</b> |
| <b>2</b>  | <b>157.10</b> | 79.05           |                |                  | <b>V</b> | 1101.63       | 551.32          | 1084.60 | 542.81           | 1083.62        | 542.31           | <b>11</b> |
| <b>3</b>  | <b>270.18</b> | 135.59          |                |                  | <b>L</b> | 1002.56       | 501.78          | 985.54  | 493.27           | 984.55         | 492.78           | <b>10</b> |
| <b>4</b>  | 383.27        | 192.14          |                |                  | <b>I</b> | <b>889.48</b> | 445.24          | 872.45  | 436.73           | 871.47         | 436.24           | <b>9</b>  |
| <b>5</b>  | 546.33        | 273.67          |                |                  | <b>Y</b> | <b>776.39</b> | 388.70          | 759.37  | 380.19           | 758.38         | 379.70           | <b>8</b>  |
| <b>6</b>  | 603.35        | 302.18          |                |                  | <b>G</b> | <b>613.33</b> | 307.17          | 596.30  | 298.66           | 595.32         | 298.16           | <b>7</b>  |
| <b>7</b>  | 700.40        | 350.71          |                |                  | <b>P</b> | <b>556.31</b> | 278.66          | 539.28  | <b>270.14</b>    | 538.30         | 269.65           | <b>6</b>  |
| <b>8</b>  | 797.46        | 399.23          |                |                  | <b>P</b> | <b>459.26</b> | 230.13          | 442.23  | 221.62           | 441.25         | 221.13           | <b>5</b>  |
| <b>9</b>  | 854.48        | 427.74          |                |                  | <b>G</b> | 362.20        | 181.61          | 345.18  | 173.09           | 344.19         | 172.60           | <b>4</b>  |
| <b>10</b> | 955.52        | 478.27          | 937.51         | 469.26           | <b>T</b> | 305.18        | 153.09          | 288.16  | 144.58           | 287.17         | 144.09           | <b>3</b>  |
| <b>11</b> | 1012.55       | 506.78          | 994.54         | 497.77           | <b>G</b> | 204.13        | 102.57          | 187.11  | 94.06            |                |                  | <b>2</b>  |
| <b>12</b> |               |                 |                |                  | <b>K</b> | 147.11        | 74.06           | 130.09  | 65.55            |                |                  | <b>1</b>  |

MS/MS Fragmentation of ID439 **TLFFDSSIR**

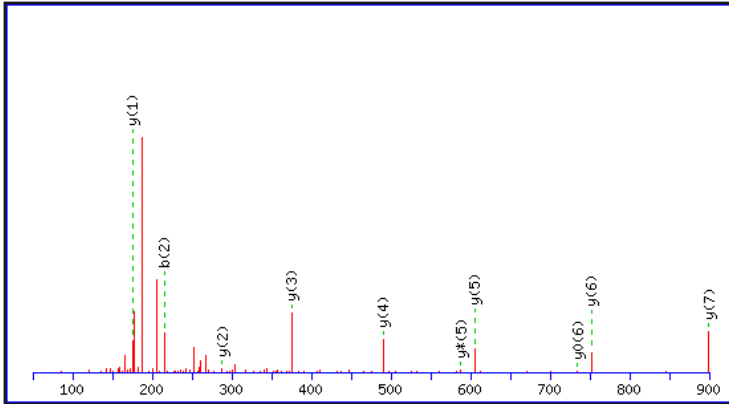

| # | <b>b</b>      | <b>b<sup>++</sup></b> | <b>b<sup>0</sup></b> | <b>b<sup>0++</sup></b> | <b>Seq.</b> | <b>y</b>      | <b>y<sup>++</sup></b> | <b>y<sup>*</sup></b> | <b>y<sup>*++</sup></b> | <b>y<sup>0</sup></b> | <b>y<sup>0++</sup></b> | # |
|---|---------------|-----------------------|----------------------|------------------------|-------------|---------------|-----------------------|----------------------|------------------------|----------------------|------------------------|---|
| 1 | 102.05        | 51.53                 | 84.04                | 42.53                  | <b>T</b>    |               |                       |                      |                        |                      |                        | 9 |
| 2 | <b>215.14</b> | 108.07                | 197.13               | 99.07                  | <b>L</b>    | 1012.51       | 506.76                | 995.48               | 498.25                 | 994.50               | 497.75                 | 8 |
| 3 | 362.21        | 181.61                | 344.20               | 172.60                 | <b>F</b>    | <b>899.43</b> | 450.22                | 882.40               | 441.70                 | 881.42               | 441.21                 | 7 |
| 4 | 509.28        | 255.14                | 491.27               | 246.14                 | <b>F</b>    | <b>752.36</b> | 376.68                | 735.33               | 368.17                 | <b>734.35</b>        | 367.68                 | 6 |
| 5 | 624.30        | 312.66                | 606.29               | 303.65                 | <b>D</b>    | <b>605.29</b> | 303.15                | <b>588.26</b>        | 294.63                 | 587.28               | 294.14                 | 5 |
| 6 | 739.33        | 370.17                | 721.32               | 361.16                 | <b>D</b>    | <b>490.26</b> | 245.63                | 473.24               | 237.12                 | 472.25               | 236.63                 | 4 |
| 7 | 826.36        | 413.68                | 808.35               | 404.68                 | <b>S</b>    | <b>375.24</b> | 188.12                | 358.21               | 179.61                 | 357.22               | 179.12                 | 3 |
| 8 | 939.45        | 470.23                | 921.44               | 461.22                 | <b>I</b>    | <b>288.20</b> | 144.61                | 271.18               | 136.09                 |                      |                        | 2 |
| 9 |               |                       |                      |                        | <b>R</b>    | <b>175.12</b> | 88.06                 | 158.09               | 79.55                  |                      |                        | 1 |

MS/MS Fragmentation of ID452 **LIESPAPGIISR**

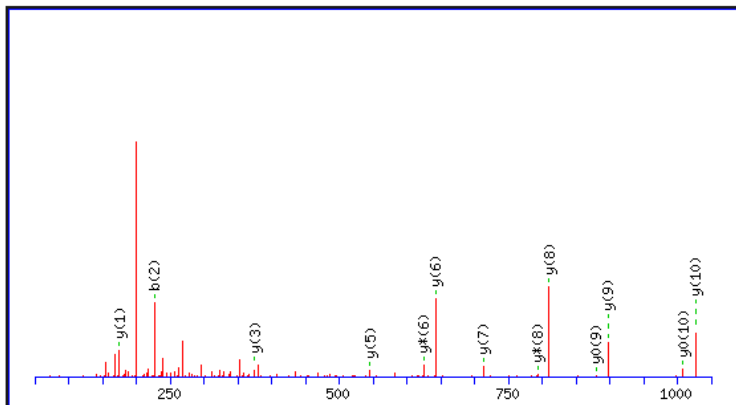

| #         | <b>b</b>      | <b>b<sup>++</sup></b> | <b>b<sup>0</sup></b> | <b>b<sup>0++</sup></b> | Seq.     | <b>y</b>       | <b>y<sup>++</sup></b> | <b>y<sup>*</sup></b> | <b>y<sup>*++</sup></b> | <b>y<sup>0</sup></b> | <b>y<sup>0++</sup></b> | #         |
|-----------|---------------|-----------------------|----------------------|------------------------|----------|----------------|-----------------------|----------------------|------------------------|----------------------|------------------------|-----------|
| <b>1</b>  | 114.09        | 57.55                 |                      |                        | <b>L</b> |                |                       |                      |                        |                      |                        | <b>12</b> |
| <b>2</b>  | <b>227.18</b> | 114.09                |                      |                        | <b>I</b> | 1139.64        | 570.32                | 1122.62              | 561.81                 | 1121.63              | 561.32                 | <b>11</b> |
| <b>3</b>  | 356.22        | 178.61                | 338.21               | 169.61                 | <b>E</b> | <b>1026.56</b> | 513.78                | 1009.53              | 505.27                 | <b>1008.55</b>       | 504.78                 | <b>10</b> |
| <b>4</b>  | 443.25        | 222.13                | 425.24               | 213.12                 | <b>S</b> | <b>897.52</b>  | 449.26                | 880.49               | 440.75                 | <b>879.50</b>        | 440.26                 | <b>9</b>  |
| <b>5</b>  | 540.30        | 270.66                | 522.29               | 261.65                 | <b>P</b> | <b>810.48</b>  | 405.75                | <b>793.46</b>        | 397.23                 | 792.47               | 396.74                 | <b>8</b>  |
| <b>6</b>  | 611.34        | 306.17                | 593.33               | 297.17                 | <b>A</b> | <b>713.43</b>  | 357.22                | 696.40               | 348.71                 | 695.42               | 348.21                 | <b>7</b>  |
| <b>7</b>  | 708.39        | 354.70                | 690.38               | 345.69                 | <b>P</b> | <b>642.39</b>  | 321.70                | <b>625.37</b>        | 313.19                 | 624.38               | 312.70                 | <b>6</b>  |
| <b>8</b>  | 765.41        | 383.21                | 747.40               | 374.21                 | <b>G</b> | <b>545.34</b>  | 273.17                | 528.31               | 264.66                 | 527.33               | 264.17                 | <b>5</b>  |
| <b>9</b>  | 878.50        | 439.75                | 860.49               | 430.75                 | <b>I</b> | 488.32         | 244.66                | 471.29               | 236.15                 | 470.31               | 235.66                 | <b>4</b>  |
| <b>10</b> | 991.58        | 496.29                | 973.57               | 487.29                 | <b>I</b> | <b>375.24</b>  | 188.12                | 358.21               | 179.61                 | 357.22               | 179.12                 | <b>3</b>  |
| <b>11</b> | 1078.61       | 539.81                | 1060.60              | 530.81                 | <b>S</b> | 262.15         | 131.58                | 245.12               | 123.07                 | 244.14               | 122.57                 | <b>2</b>  |
| <b>12</b> |               |                       |                      |                        | <b>R</b> | <b>175.12</b>  | 88.06                 | 158.09               | 79.55                  |                      |                        | <b>1</b>  |

MS/MS Fragmentation of ID455 **NQSGYIEIEELR**

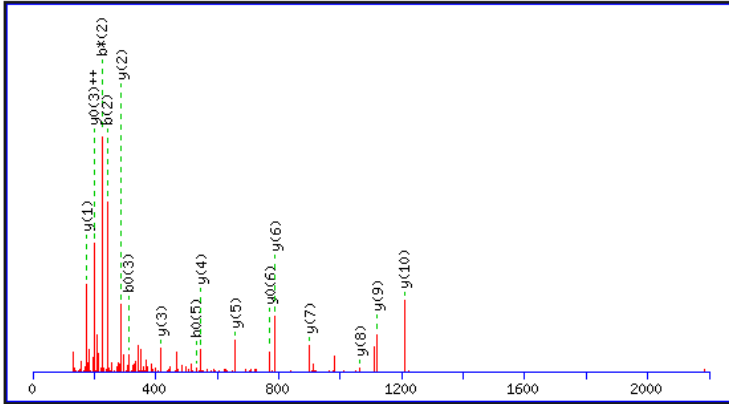

| #  | b             | b <sup>++</sup> | b*            | b <sup>*++</sup> | b <sup>0</sup> | b <sup>0++</sup> | Seq. | y              | y <sup>++</sup> | y*      | y <sup>*++</sup> | y <sup>0</sup> | y <sup>0++</sup> | #  |
|----|---------------|-----------------|---------------|------------------|----------------|------------------|------|----------------|-----------------|---------|------------------|----------------|------------------|----|
| 1  | 115.05        | 58.03           | 98.02         | 49.52            |                |                  | N    |                |                 |         |                  |                |                  | 12 |
| 2  | <b>243.11</b> | 122.06          | <b>226.08</b> | 113.54           |                |                  | Q    | 1336.67        | 668.84          | 1319.65 | 660.33           | 1318.66        | 659.84           | 11 |
| 3  | 330.14        | 165.57          | 313.11        | 157.06           | <b>312.13</b>  | 156.57           | S    | <b>1208.62</b> | 604.81          | 1191.59 | 596.30           | 1190.61        | 595.81           | 10 |
| 4  | 387.16        | 194.08          | 370.14        | 185.57           | 369.15         | 185.08           | G    | <b>1121.58</b> | 561.30          | 1104.56 | 552.78           | 1103.57        | 552.29           | 9  |
| 5  | 550.23        | 275.62          | 533.20        | 267.10           | <b>532.22</b>  | 266.61           | Y    | <b>1064.56</b> | 532.78          | 1047.54 | 524.27           | 1046.55        | 523.78           | 8  |
| 6  | 663.31        | 332.16          | 646.28        | 323.65           | 645.30         | 323.15           | I    | <b>901.50</b>  | 451.25          | 884.47  | 442.74           | 883.49         | 442.25           | 7  |
| 7  | 792.35        | 396.68          | 775.33        | 388.17           | 774.34         | 387.67           | E    | <b>788.41</b>  | 394.71          | 771.39  | 386.20           | <b>770.40</b>  | 385.71           | 6  |
| 8  | 905.44        | 453.22          | 888.41        | 444.71           | 887.43         | 444.22           | I    | <b>659.37</b>  | 330.19          | 642.35  | 321.68           | 641.36         | 321.18           | 5  |
| 9  | 1034.48       | 517.74          | 1017.45       | 509.23           | 1016.47        | 508.74           | E    | <b>546.29</b>  | 273.65          | 529.26  | 265.13           | 528.28         | 264.64           | 4  |
| 10 | 1163.52       | 582.26          | 1146.49       | 573.75           | 1145.51        | 573.26           | E    | <b>417.25</b>  | 209.13          | 400.22  | 200.61           | 399.24         | <b>200.12</b>    | 3  |
| 11 | 1276.61       | 638.81          | 1259.58       | 630.29           | 1258.59        | 629.80           | L    | <b>288.20</b>  | 144.61          | 271.18  | 136.09           |                |                  | 2  |
| 12 |               |                 |               |                  |                |                  | R    | <b>175.12</b>  | 88.06           | 158.09  | 79.55            |                |                  | 1  |

MS/MS Fragmentation of ID456 **MDLTAIHEILEK**

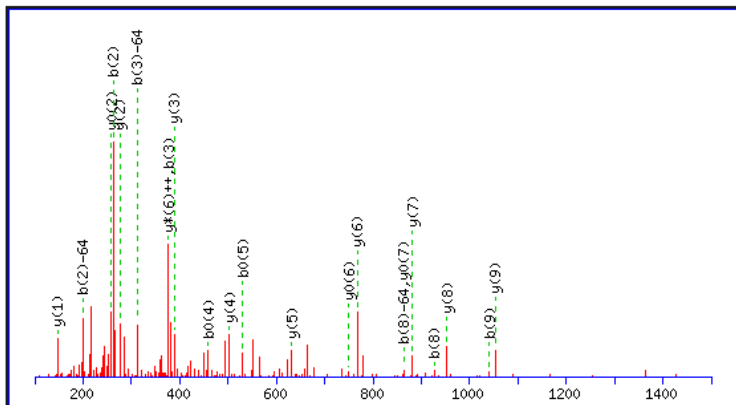

| #         | <b>b</b>      | <b>b<sup>++</sup></b> | <b>b<sup>0</sup></b> | <b>b<sup>0++</sup></b> | Seq.     | <b>y</b>       | <b>y<sup>++</sup></b> | <b>y<sup>*</sup></b> | <b>y<sup>*++</sup></b> | <b>y<sup>0</sup></b> | <b>y<sup>0++</sup></b> | #         |
|-----------|---------------|-----------------------|----------------------|------------------------|----------|----------------|-----------------------|----------------------|------------------------|----------------------|------------------------|-----------|
| <b>1</b>  | 84.04         | 42.53                 |                      |                        | <b>M</b> |                |                       |                      |                        |                      |                        | <b>12</b> |
| <b>2</b>  | <b>199.07</b> | 100.04                | 181.06               | 91.03                  | <b>D</b> | 1281.70        | 641.36                | 1264.68              | 632.84                 | 1263.69              | 632.35                 | <b>11</b> |
| <b>3</b>  | <b>312.16</b> | 156.58                | 294.14               | 147.58                 | <b>L</b> | 1166.68        | 583.84                | 1149.65              | 575.33                 | 1148.67              | 574.84                 | <b>10</b> |
| <b>4</b>  | 413.20        | 207.11                | 395.19               | 198.10                 | <b>T</b> | <b>1053.59</b> | 527.30                | 1036.57              | 518.79                 | 1035.58              | 518.30                 | <b>9</b>  |
| <b>5</b>  | 484.24        | 242.62                | 466.23               | 233.62                 | <b>A</b> | <b>952.55</b>  | 476.78                | 935.52               | 468.26                 | 934.54               | 467.77                 | <b>8</b>  |
| <b>6</b>  | 597.32        | 299.17                | 579.31               | 290.16                 | <b>I</b> | <b>881.51</b>  | 441.26                | 864.48               | 432.74                 | <b>863.50</b>        | 432.25                 | <b>7</b>  |
| <b>7</b>  | 734.38        | 367.70                | 716.37               | 358.69                 | <b>H</b> | <b>768.43</b>  | 384.72                | 751.40               | <b>376.20</b>          | <b>750.41</b>        | 375.71                 | <b>6</b>  |
| <b>8</b>  | <b>863.43</b> | 432.22                | 845.42               | 423.21                 | <b>E</b> | <b>631.37</b>  | 316.19                | 614.34               | 307.67                 | 613.36               | 307.18                 | <b>5</b>  |
| <b>9</b>  | 976.51        | 488.76                | 958.50               | 479.75                 | <b>I</b> | <b>502.32</b>  | 251.67                | 485.30               | 243.15                 | 484.31               | 242.66                 | <b>4</b>  |
| <b>10</b> | 1089.59       | 545.30                | 1071.58              | 536.30                 | <b>L</b> | <b>389.24</b>  | 195.12                | 372.21               | 186.61                 | 371.23               | 186.12                 | <b>3</b>  |
| <b>11</b> | 1218.64       | 609.82                | 1200.63              | 600.82                 | <b>E</b> | <b>276.16</b>  | 138.58                | 259.13               | 130.07                 | <b>258.14</b>        | 129.58                 | <b>2</b>  |
| <b>12</b> |               |                       |                      |                        | <b>K</b> | <b>147.11</b>  | 74.06                 | 130.09               | 65.55                  |                      |                        | <b>1</b>  |

MS/MS Fragmentation of ID458 **LPVEVLR**

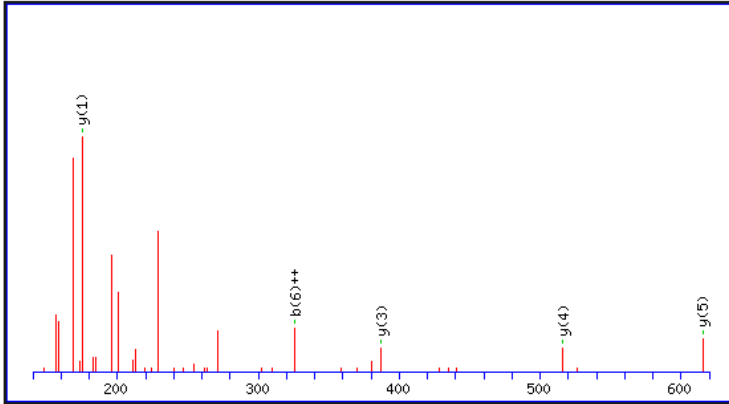

| #        | <b>b</b> | <b>b<sup>++</sup></b> | <b>b<sup>0</sup></b> | <b>b<sup>0++</sup></b> | <b>Seq.</b> | <b>y</b>      | <b>y<sup>++</sup></b> | <b>y*</b> | <b>y<sup>+++</sup></b> | <b>y<sup>0</sup></b> | <b>y<sup>0++</sup></b> | #        |
|----------|----------|-----------------------|----------------------|------------------------|-------------|---------------|-----------------------|-----------|------------------------|----------------------|------------------------|----------|
| <b>1</b> | 114.09   | 57.55                 |                      |                        | <b>L</b>    |               |                       |           |                        |                      |                        | <b>7</b> |
| <b>2</b> | 211.14   | 106.08                |                      |                        | <b>P</b>    | 712.44        | 356.72                | 695.41    | 348.21                 | 694.42               | 347.72                 | <b>6</b> |
| <b>3</b> | 310.21   | 155.61                |                      |                        | <b>V</b>    | <b>615.38</b> | 308.19                | 598.36    | 299.68                 | 597.37               | 299.19                 | <b>5</b> |
| <b>4</b> | 439.26   | 220.13                | 421.24               | 211.13                 | <b>E</b>    | <b>516.31</b> | 258.66                | 499.29    | 250.15                 | 498.30               | 249.66                 | <b>4</b> |
| <b>5</b> | 538.32   | 269.67                | 520.31               | 260.66                 | <b>V</b>    | <b>387.27</b> | 194.14                | 370.24    | 185.63                 |                      |                        | <b>3</b> |
| <b>6</b> | 651.41   | <b>326.21</b>         | 633.40               | 317.20                 | <b>L</b>    | 288.20        | 144.61                | 271.18    | 136.09                 |                      |                        | <b>2</b> |
| <b>7</b> |          |                       |                      |                        | <b>R</b>    | <b>175.12</b> | 88.06                 | 158.09    | 79.55                  |                      |                        | <b>1</b> |

MS/MS Fragmentation of ID459 **SSNILLDDDFQPK**

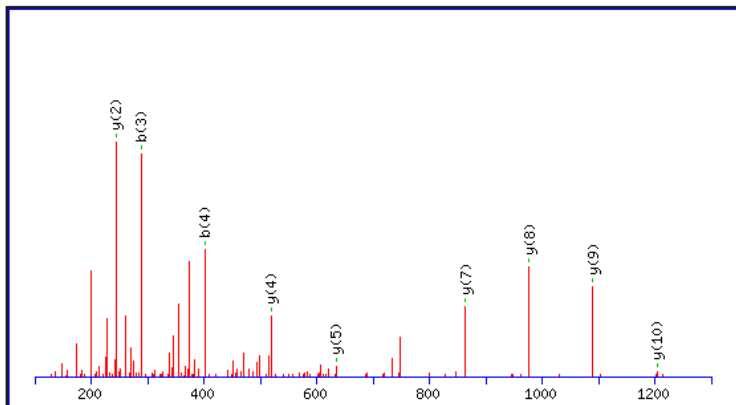

| #  | b             | b <sup>++</sup> | b*      | b <sup>*++</sup> | b <sup>0</sup> | b <sup>0++</sup> | Seq. | y              | y <sup>++</sup> | y*      | y <sup>*++</sup> | y <sup>0</sup> | y <sup>0++</sup> | #  |
|----|---------------|-----------------|---------|------------------|----------------|------------------|------|----------------|-----------------|---------|------------------|----------------|------------------|----|
| 1  | 88.04         | 44.52           |         |                  | 70.03          | 35.52            | S    |                |                 |         |                  |                |                  | 13 |
| 2  | 175.07        | 88.04           |         |                  | 157.06         | 79.03            | S    | 1404.70        | 702.85          | 1387.67 | 694.34           | 1386.69        | 693.85           | 12 |
| 3  | <b>289.11</b> | 145.06          | 272.09  | 136.55           | 271.10         | 136.06           | N    | 1317.67        | 659.34          | 1300.64 | 650.82           | 1299.66        | 650.33           | 11 |
| 4  | <b>402.20</b> | 201.60          | 385.17  | 193.09           | 384.19         | 192.60           | I    | <b>1203.63</b> | 602.32          | 1186.60 | 593.80           | 1185.61        | 593.31           | 10 |
| 5  | 515.28        | 258.14          | 498.26  | 249.63           | 497.27         | 249.14           | L    | <b>1090.54</b> | 545.77          | 1073.51 | 537.26           | 1072.53        | 536.77           | 9  |
| 6  | 628.37        | 314.69          | 611.34  | 306.17           | 610.36         | 305.68           | L    | <b>977.46</b>  | 489.23          | 960.43  | 480.72           | 959.45         | 480.23           | 8  |
| 7  | 743.39        | 372.20          | 726.37  | 363.69           | 725.38         | 363.20           | D    | <b>864.37</b>  | 432.69          | 847.35  | 424.18           | 846.36         | 423.69           | 7  |
| 8  | 858.42        | 429.71          | 841.39  | 421.20           | 840.41         | 420.71           | D    | 749.35         | 375.18          | 732.32  | 366.66           | 731.34         | 366.17           | 6  |
| 9  | 973.45        | 487.23          | 956.42  | 478.71           | 955.44         | 478.22           | D    | <b>634.32</b>  | 317.66          | 617.29  | 309.15           | 616.31         | 308.66           | 5  |
| 10 | 1120.52       | 560.76          | 1103.49 | 552.25           | 1102.51        | 551.76           | F    | <b>519.29</b>  | 260.15          | 502.27  | 251.64           |                |                  | 4  |
| 11 | 1248.57       | 624.79          | 1231.55 | 616.28           | 1230.56        | 615.79           | Q    | 372.22         | 186.62          | 355.20  | 178.10           |                |                  | 3  |
| 12 | 1345.63       | 673.32          | 1328.60 | 664.80           | 1327.62        | 664.31           | P    | <b>244.17</b>  | 122.59          | 227.14  | 114.07           |                |                  | 2  |
| 13 |               |                 |         |                  |                |                  | K    | 147.11         | 74.06           | 130.09  | 65.55            |                |                  | 1  |

MS/MS Fragmentation of ID460 **IPSSIGNLR**

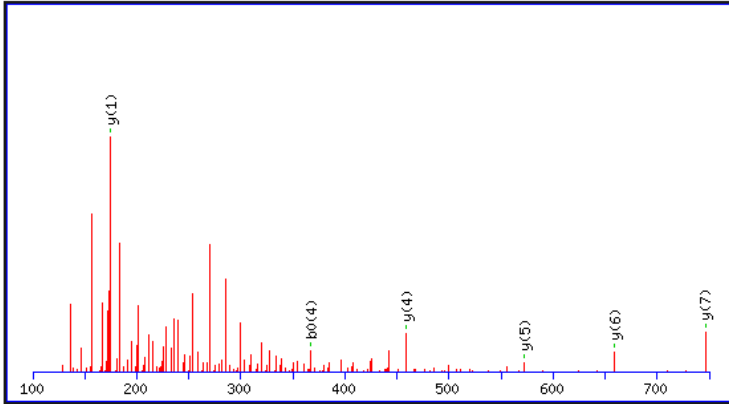

| #        | <b>b</b> | <b>b<sup>++</sup></b> | <b>b<sup>*</sup></b> | <b>b<sup>*++</sup></b> | <b>b<sup>0</sup></b> | <b>b<sup>0++</sup></b> | <b>Seq.</b> | <b>y</b>      | <b>y<sup>++</sup></b> | <b>y<sup>*</sup></b> | <b>y<sup>*++</sup></b> | <b>y<sup>0</sup></b> | <b>y<sup>0++</sup></b> | #        |
|----------|----------|-----------------------|----------------------|------------------------|----------------------|------------------------|-------------|---------------|-----------------------|----------------------|------------------------|----------------------|------------------------|----------|
| <b>1</b> | 114.09   | 57.55                 |                      |                        |                      |                        | <b>I</b>    |               |                       |                      |                        |                      |                        | <b>9</b> |
| <b>2</b> | 211.14   | 106.08                |                      |                        |                      |                        | <b>P</b>    | 843.47        | 422.24                | 826.44               | 413.72                 | 825.46               | 413.23                 | <b>8</b> |
| <b>3</b> | 298.18   | 149.59                |                      |                        | 280.17               | 140.59                 | <b>S</b>    | <b>746.42</b> | 373.71                | 729.39               | 365.20                 | 728.40               | 364.71                 | <b>7</b> |
| <b>4</b> | 385.21   | 193.11                |                      |                        | <b>367.20</b>        | 184.10                 | <b>S</b>    | <b>659.38</b> | 330.20                | 642.36               | 321.68                 | 641.37               | 321.19                 | <b>6</b> |
| <b>5</b> | 498.29   | 249.65                |                      |                        | 480.28               | 240.64                 | <b>I</b>    | <b>572.35</b> | 286.68                | 555.32               | 278.17                 |                      |                        | <b>5</b> |
| <b>6</b> | 555.31   | 278.16                |                      |                        | 537.30               | 269.16                 | <b>G</b>    | <b>459.27</b> | 230.14                | 442.24               | 221.62                 |                      |                        | <b>4</b> |
| <b>7</b> | 669.36   | 335.18                | 652.33               | 326.67                 | 651.35               | 326.18                 | <b>N</b>    | 402.25        | 201.63                | 385.22               | 193.11                 |                      |                        | <b>3</b> |
| <b>8</b> | 782.44   | 391.72                | 765.41               | 383.21                 | 764.43               | 382.72                 | <b>L</b>    | 288.20        | 144.61                | 271.18               | 136.09                 |                      |                        | <b>2</b> |
| <b>9</b> |          |                       |                      |                        |                      |                        | <b>R</b>    | <b>175.12</b> | 88.06                 | 158.09               | 79.55                  |                      |                        | <b>1</b> |



MS/MS Fragmentation of ID461 **TALAFVTLR**

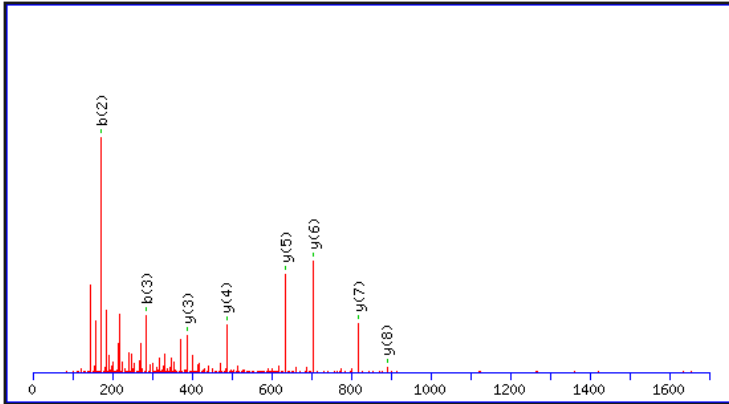

| # | <b>b</b>      | <b>b<sup>++</sup></b> | <b>b<sup>0</sup></b> | <b>b<sup>0++</sup></b> | <b>Seq.</b> | <b>y</b>      | <b>y<sup>++</sup></b> | <b>y<sup>*</sup></b> | <b>y<sup>+++</sup></b> | <b>y<sup>0</sup></b> | <b>y<sup>0++</sup></b> | # |
|---|---------------|-----------------------|----------------------|------------------------|-------------|---------------|-----------------------|----------------------|------------------------|----------------------|------------------------|---|
| 1 | 102.05        | 51.53                 | 84.04                | 42.53                  | <b>T</b>    |               |                       |                      |                        |                      |                        | 9 |
| 2 | <b>173.09</b> | 87.05                 | 155.08               | 78.04                  | <b>A</b>    | <b>890.55</b> | 445.78                | 873.52               | 437.26                 | 872.54               | 436.77                 | 8 |
| 3 | <b>286.18</b> | 143.59                | 268.17               | 134.59                 | <b>L</b>    | <b>819.51</b> | 410.26                | 802.48               | 401.74                 | 801.50               | 401.25                 | 7 |
| 4 | 357.21        | 179.11                | 339.20               | 170.10                 | <b>A</b>    | <b>706.42</b> | 353.72                | 689.40               | 345.20                 | 688.41               | 344.71                 | 6 |
| 5 | 504.28        | 252.64                | 486.27               | 243.64                 | <b>F</b>    | <b>635.39</b> | 318.20                | 618.36               | 309.68                 | 617.38               | 309.19                 | 5 |
| 6 | 603.35        | 302.18                | 585.34               | 293.17                 | <b>V</b>    | <b>488.32</b> | 244.66                | 471.29               | 236.15                 | 470.31               | 235.66                 | 4 |
| 7 | 704.40        | 352.70                | 686.39               | 343.70                 | <b>T</b>    | <b>389.25</b> | 195.13                | 372.22               | 186.62                 | 371.24               | 186.12                 | 3 |
| 8 | 817.48        | 409.24                | 799.47               | 400.24                 | <b>L</b>    | 288.20        | 144.61                | 271.18               | 136.09                 |                      |                        | 2 |
| 9 |               |                       |                      |                        | <b>R</b>    | 175.12        | 88.06                 | 158.09               | 79.55                  |                      |                        | 1 |

MS/MS Fragmentation of ID465 **STGVIALSK**

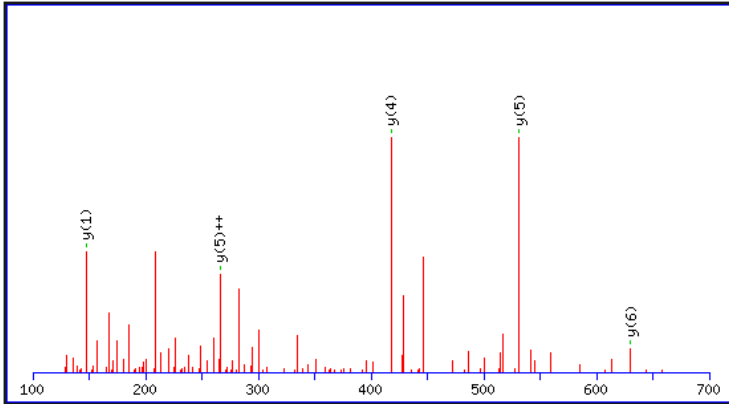

| #        | <b>b</b> | <b>b<sup>++</sup></b> | <b>b<sup>0</sup></b> | <b>b<sup>0++</sup></b> | <b>Seq.</b> | <b>y</b>      | <b>y<sup>++</sup></b> | <b>y<sup>*</sup></b> | <b>y<sup>+++</sup></b> | <b>y<sup>0</sup></b> | <b>y<sup>0++</sup></b> | #        |
|----------|----------|-----------------------|----------------------|------------------------|-------------|---------------|-----------------------|----------------------|------------------------|----------------------|------------------------|----------|
| <b>1</b> | 130.05   | 65.53                 | 112.04               | 56.52                  | <b>S</b>    |               |                       |                      |                        |                      |                        | <b>9</b> |
| <b>2</b> | 231.10   | 116.05                | 213.09               | 107.05                 | <b>T</b>    | 788.49        | 394.75                | 771.46               | 386.23                 | 770.48               | 385.74                 | <b>8</b> |
| <b>3</b> | 288.12   | 144.56                | 270.11               | 135.56                 | <b>G</b>    | 687.44        | 344.22                | 670.41               | 335.71                 | 669.43               | 335.22                 | <b>7</b> |
| <b>4</b> | 387.19   | 194.10                | 369.18               | 185.09                 | <b>V</b>    | <b>630.42</b> | 315.71                | 613.39               | 307.20                 | 612.41               | 306.71                 | <b>6</b> |
| <b>5</b> | 500.27   | 250.64                | 482.26               | 241.63                 | <b>I</b>    | <b>531.35</b> | <b>266.18</b>         | 514.32               | 257.67                 | 513.34               | 257.17                 | <b>5</b> |
| <b>6</b> | 571.31   | 286.16                | 553.30               | 277.15                 | <b>A</b>    | <b>418.27</b> | 209.64                | 401.24               | 201.12                 | 400.26               | 200.63                 | <b>4</b> |
| <b>7</b> | 684.39   | 342.70                | 666.38               | 333.69                 | <b>L</b>    | 347.23        | 174.12                | 330.20               | 165.60                 | 329.22               | 165.11                 | <b>3</b> |
| <b>8</b> | 771.42   | 386.22                | 753.41               | 377.21                 | <b>S</b>    | 234.14        | 117.58                | 217.12               | 109.06                 | 216.13               | 108.57                 | <b>2</b> |
| <b>9</b> |          |                       |                      |                        | <b>K</b>    | <b>147.11</b> | 74.06                 | 130.09               | 65.55                  |                      |                        | <b>1</b> |

MS/MS Fragmentation of ID468 **VFLESSLPVVEYYDSK**

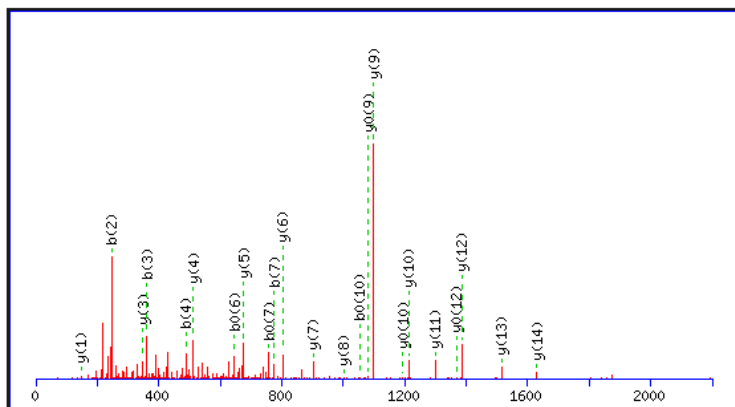

| #  | b       | b <sup>++</sup> | b <sup>0</sup> | b <sup>0++</sup> | Seq. | y       | y <sup>++</sup> | y <sup>*</sup> | y <sup>*++</sup> | y <sup>0</sup> | y <sup>0++</sup> | #  |
|----|---------|-----------------|----------------|------------------|------|---------|-----------------|----------------|------------------|----------------|------------------|----|
| 1  | 100.08  | 50.54           |                |                  | V    |         |                 |                |                  |                |                  | 16 |
| 2  | 247.14  | 124.08          |                |                  | F    | 1775.87 | 888.44          | 1758.85        | 879.93           | 1757.86        | 879.44           | 15 |
| 3  | 360.23  | 180.62          |                |                  | L    | 1628.81 | 814.91          | 1611.78        | 806.39           | 1610.79        | 805.90           | 14 |
| 4  | 489.27  | 245.14          | 471.26         | 236.13           | E    | 1515.72 | 758.36          | 1498.69        | 749.85           | 1497.71        | 749.36           | 13 |
| 5  | 576.30  | 288.66          | 558.29         | 279.65           | S    | 1386.68 | 693.84          | 1369.65        | 685.33           | 1368.67        | 684.84           | 12 |
| 6  | 663.33  | 332.17          | 645.32         | 323.17           | S    | 1299.65 | 650.33          | 1282.62        | 641.81           | 1281.64        | 641.32           | 11 |
| 7  | 776.42  | 388.71          | 758.41         | 379.71           | L    | 1212.61 | 606.81          | 1195.59        | 598.30           | 1194.60        | 597.81           | 10 |
| 8  | 873.47  | 437.24          | 855.46         | 428.23           | P    | 1099.53 | 550.27          | 1082.50        | 541.76           | 1081.52        | 541.26           | 9  |
| 9  | 972.54  | 486.77          | 954.53         | 477.77           | V    | 1002.48 | 501.74          | 985.45         | 493.23           | 984.47         | 492.74           | 8  |
| 10 | 1071.61 | 536.31          | 1053.60        | 527.30           | V    | 903.41  | 452.21          | 886.38         | 443.70           | 885.40         | 443.20           | 7  |
| 11 | 1200.65 | 600.83          | 1182.64        | 591.82           | E    | 804.34  | 402.67          | 787.31         | 394.16           | 786.33         | 393.67           | 6  |
| 12 | 1363.71 | 682.36          | 1345.70        | 673.36           | Y    | 675.30  | 338.15          | 658.27         | 329.64           | 657.29         | 329.15           | 5  |
| 13 | 1526.78 | 763.89          | 1508.77        | 754.89           | Y    | 512.24  | 256.62          | 495.21         | 248.11           | 494.22         | 247.62           | 4  |
| 14 | 1641.80 | 821.41          | 1623.79        | 812.40           | D    | 349.17  | 175.09          | 332.15         | 166.58           | 331.16         | 166.08           | 3  |
| 15 | 1728.84 | 864.92          | 1710.83        | 855.92           | S    | 234.14  | 117.58          | 217.12         | 109.06           | 216.13         | 108.57           | 2  |
| 16 |         |                 |                |                  | K    | 147.11  | 74.06           | 130.09         | 65.55            |                |                  | 1  |

MS/MS Fragmentation of ID470 **LQWFSVAGNR**

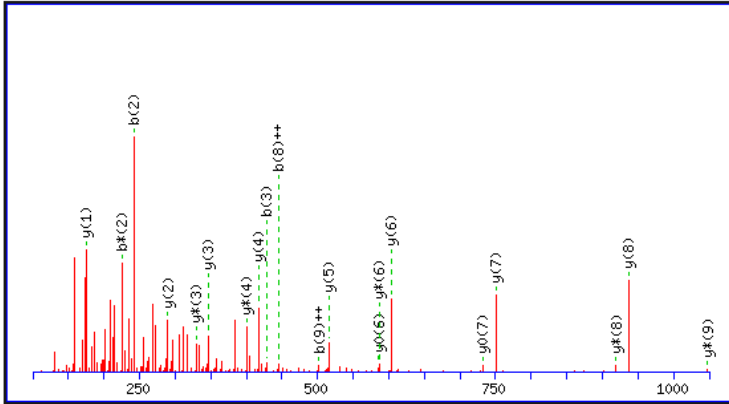

| #  | b             | b <sup>++</sup> | b*            | b <sup>*++</sup> | b <sup>0</sup> | b <sup>0++</sup> | Seq. | y             | y <sup>++</sup> | y*             | y <sup>*++</sup> | y <sup>0</sup> | y <sup>0++</sup> | #  |
|----|---------------|-----------------|---------------|------------------|----------------|------------------|------|---------------|-----------------|----------------|------------------|----------------|------------------|----|
| 1  | 114.09        | 57.55           |               |                  |                |                  | L    |               |                 |                |                  |                |                  | 10 |
| 2  | <b>242.15</b> | 121.58          | <b>225.12</b> | 113.07           |                |                  | Q    | 1064.53       | 532.77          | <b>1047.50</b> | 524.25           | 1046.52        | 523.76           | 9  |
| 3  | <b>428.23</b> | 214.62          | 411.20        | 206.10           |                |                  | W    | <b>936.47</b> | 468.74          | <b>919.44</b>  | 460.22           | 918.46         | 459.73           | 8  |
| 4  | 575.30        | 288.15          | 558.27        | 279.64           |                |                  | F    | <b>750.39</b> | 375.70          | 733.36         | 367.19           | <b>732.38</b>  | 366.69           | 7  |
| 5  | 662.33        | 331.67          | 645.30        | 323.16           | 644.32         | 322.66           | S    | <b>603.32</b> | 302.16          | <b>586.29</b>  | 293.65           | <b>585.31</b>  | 293.16           | 6  |
| 6  | 761.40        | 381.20          | 744.37        | 372.69           | 743.39         | 372.20           | V    | <b>516.29</b> | 258.65          | 499.26         | 250.13           |                |                  | 5  |
| 7  | 832.44        | 416.72          | 815.41        | 408.21           | 814.42         | 407.72           | A    | <b>417.22</b> | 209.11          | <b>400.19</b>  | 200.60           |                |                  | 4  |
| 8  | 889.46        | <b>445.23</b>   | 872.43        | 436.72           | 871.45         | 436.23           | G    | <b>346.18</b> | 173.60          | <b>329.16</b>  | 165.08           |                |                  | 3  |
| 9  | 1003.50       | <b>502.25</b>   | 986.47        | 493.74           | 985.49         | 493.25           | N    | <b>289.16</b> | 145.08          | 272.14         | 136.57           |                |                  | 2  |
| 10 |               |                 |               |                  |                |                  | R    | <b>175.12</b> | 88.06           | 158.09         | 79.55            |                |                  | 1  |

MS/MS Fragmentation of ID472 **VASVYSEVQSSR**

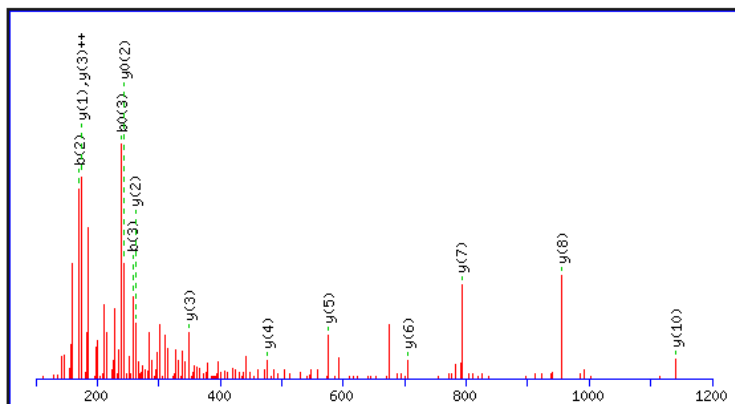

| #  | b       | b <sup>++</sup> | b <sup>*</sup> | b <sup>*++</sup> | b <sup>0</sup> | b <sup>0++</sup> | Seq. | y       | y <sup>++</sup> | y <sup>*</sup> | y <sup>*++</sup> | y <sup>0</sup> | y <sup>0++</sup> | #  |
|----|---------|-----------------|----------------|------------------|----------------|------------------|------|---------|-----------------|----------------|------------------|----------------|------------------|----|
| 1  | 100.08  | 50.54           |                |                  |                |                  | V    |         |                 |                |                  |                |                  | 12 |
| 2  | 171.11  | 86.06           |                |                  |                |                  | A    | 1212.59 | 606.80          | 1195.56        | 598.28           | 1194.57        | 597.79           | 11 |
| 3  | 258.14  | 129.58          |                |                  | 240.13         | 120.57           | S    | 1141.55 | 571.28          | 1124.52        | 562.76           | 1123.54        | 562.27           | 10 |
| 4  | 357.21  | 179.11          |                |                  | 339.20         | 170.10           | V    | 1054.52 | 527.76          | 1037.49        | 519.25           | 1036.51        | 518.76           | 9  |
| 5  | 520.28  | 260.64          |                |                  | 502.27         | 251.64           | Y    | 955.45  | 478.23          | 938.42         | 469.71           | 937.44         | 469.22           | 8  |
| 6  | 607.31  | 304.16          |                |                  | 589.30         | 295.15           | S    | 792.38  | 396.70          | 775.36         | 388.18           | 774.37         | 387.69           | 7  |
| 7  | 736.35  | 368.68          |                |                  | 718.34         | 359.67           | E    | 705.35  | 353.18          | 688.33         | 344.67           | 687.34         | 344.17           | 6  |
| 8  | 835.42  | 418.21          |                |                  | 817.41         | 409.21           | V    | 576.31  | 288.66          | 559.28         | 280.15           | 558.30         | 279.65           | 5  |
| 9  | 963.48  | 482.24          | 946.45         | 473.73           | 945.47         | 473.24           | Q    | 477.24  | 239.12          | 460.22         | 230.61           | 459.23         | 230.12           | 4  |
| 10 | 1050.51 | 525.76          | 1033.48        | 517.25           | 1032.50        | 516.75           | S    | 349.18  | 175.10          | 332.16         | 166.58           | 331.17         | 166.09           | 3  |
| 11 | 1137.54 | 569.27          | 1120.52        | 560.76           | 1119.53        | 560.27           | S    | 262.15  | 131.58          | 245.12         | 123.07           | 244.14         | 122.57           | 2  |
| 12 |         |                 |                |                  |                |                  | R    | 175.12  | 88.06           | 158.09         | 79.55            |                |                  | 1  |

MS/MS Fragmentation of ID473 **AYFEALTLR**

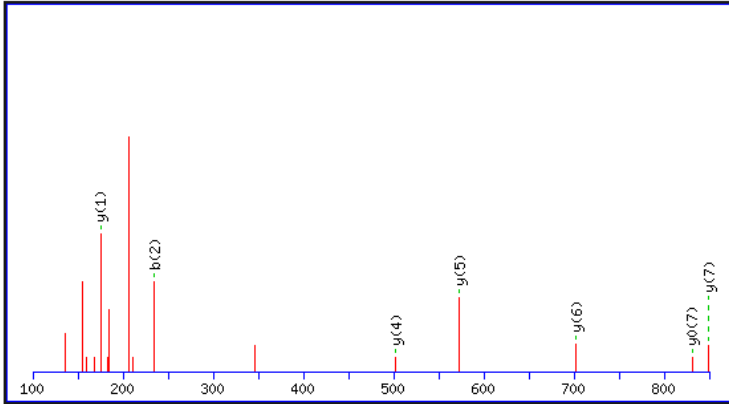

| # | <b>b</b>      | <b>b<sup>++</sup></b> | <b>b<sup>0</sup></b> | <b>b<sup>0++</sup></b> | <b>Seq.</b> | <b>y</b>      | <b>y<sup>++</sup></b> | <b>y<sup>*</sup></b> | <b>y<sup>*++</sup></b> | <b>y<sup>0</sup></b> | <b>y<sup>0++</sup></b> | #        |
|---|---------------|-----------------------|----------------------|------------------------|-------------|---------------|-----------------------|----------------------|------------------------|----------------------|------------------------|----------|
| 1 | 72.04         | 36.53                 |                      |                        | <b>A</b>    |               |                       |                      |                        |                      |                        | <b>9</b> |
| 2 | <b>235.11</b> | 118.06                |                      |                        | <b>Y</b>    | 1012.55       | 506.78                | 995.52               | 498.26                 | 994.54               | 497.77                 | <b>8</b> |
| 3 | 382.18        | 191.59                |                      |                        | <b>F</b>    | <b>849.48</b> | 425.25                | 832.46               | 416.73                 | <b>831.47</b>        | 416.24                 | <b>7</b> |
| 4 | 511.22        | 256.11                | 493.21               | 247.11                 | <b>E</b>    | <b>702.41</b> | 351.71                | 685.39               | 343.20                 | 684.40               | 342.71                 | <b>6</b> |
| 5 | 582.26        | 291.63                | 564.25               | 282.63                 | <b>A</b>    | <b>573.37</b> | 287.19                | 556.35               | 278.68                 | 555.36               | 278.18                 | <b>5</b> |
| 6 | 695.34        | 348.17                | 677.33               | 339.17                 | <b>L</b>    | <b>502.33</b> | 251.67                | 485.31               | 243.16                 | 484.32               | 242.67                 | <b>4</b> |
| 7 | 796.39        | 398.70                | 778.38               | 389.69                 | <b>T</b>    | 389.25        | 195.13                | 372.22               | 186.62                 | 371.24               | 186.12                 | <b>3</b> |
| 8 | 909.47        | 455.24                | 891.46               | 446.23                 | <b>L</b>    | 288.20        | 144.61                | 271.18               | 136.09                 |                      |                        | <b>2</b> |
| 9 |               |                       |                      |                        | <b>R</b>    | <b>175.12</b> | 88.06                 | 158.09               | 79.55                  |                      |                        | <b>1</b> |

MS/MS Fragmentation of ID488 **AVGSALELSQITGSR**

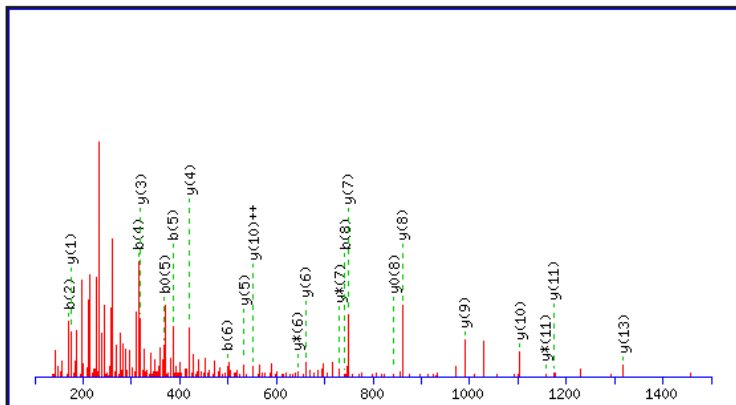

| #  | b       | b <sup>++</sup> | b <sup>*</sup> | b <sup>*++</sup> | b <sup>0</sup> | b <sup>0++</sup> | Seq. | y       | y <sup>++</sup> | y <sup>*</sup> | y <sup>*++</sup> | y <sup>0</sup> | y <sup>0++</sup> | #  |
|----|---------|-----------------|----------------|------------------|----------------|------------------|------|---------|-----------------|----------------|------------------|----------------|------------------|----|
| 1  | 72.04   | 36.53           |                |                  |                |                  | A    |         |                 |                |                  |                |                  | 15 |
| 2  | 171.11  | 86.06           |                |                  |                |                  | V    | 1417.76 | 709.39          | 1400.74        | 700.87           | 1399.75        | 700.38           | 14 |
| 3  | 228.13  | 114.57          |                |                  |                |                  | G    | 1318.70 | 659.85          | 1301.67        | 651.34           | 1300.69        | 650.85           | 13 |
| 4  | 315.17  | 158.09          |                |                  | 297.16         | 149.08           | S    | 1261.67 | 631.34          | 1244.65        | 622.83           | 1243.66        | 622.34           | 12 |
| 5  | 386.20  | 193.61          |                |                  | 368.19         | 184.60           | A    | 1174.64 | 587.82          | 1157.62        | 579.31           | 1156.63        | 578.82           | 11 |
| 6  | 499.29  | 250.15          |                |                  | 481.28         | 241.14           | L    | 1103.61 | 552.31          | 1086.58        | 543.79           | 1085.59        | 543.30           | 10 |
| 7  | 628.33  | 314.67          |                |                  | 610.32         | 305.66           | E    | 990.52  | 495.76          | 973.49         | 487.25           | 972.51         | 486.76           | 9  |
| 8  | 741.41  | 371.21          |                |                  | 723.40         | 362.21           | L    | 861.48  | 431.24          | 844.45         | 422.73           | 843.47         | 422.24           | 8  |
| 9  | 828.45  | 414.73          |                |                  | 810.44         | 405.72           | S    | 748.39  | 374.70          | 731.37         | 366.19           | 730.38         | 365.70           | 7  |
| 10 | 956.50  | 478.76          | 939.48         | 470.24           | 938.49         | 469.75           | Q    | 661.36  | 331.19          | 644.34         | 322.67           | 643.35         | 322.18           | 6  |
| 11 | 1069.59 | 535.30          | 1052.56        | 526.78           | 1051.58        | 526.29           | I    | 533.30  | 267.16          | 516.28         | 258.64           | 515.29         | 258.15           | 5  |
| 12 | 1170.64 | 585.82          | 1153.61        | 577.31           | 1152.63        | 576.82           | T    | 420.22  | 210.61          | 403.19         | 202.10           | 402.21         | 201.61           | 4  |
| 13 | 1227.66 | 614.33          | 1210.63        | 605.82           | 1209.65        | 605.33           | G    | 319.17  | 160.09          | 302.15         | 151.58           | 301.16         | 151.08           | 3  |
| 14 | 1314.69 | 657.85          | 1297.66        | 649.34           | 1296.68        | 648.84           | S    | 262.15  | 131.58          | 245.12         | 123.07           | 244.14         | 122.57           | 2  |
| 15 |         |                 |                |                  |                |                  | R    | 175.12  | 88.06           | 158.09         | 79.55            |                |                  | 1  |

MS/MS Fragmentation of ID489 **GLVPVLYAGSAK**

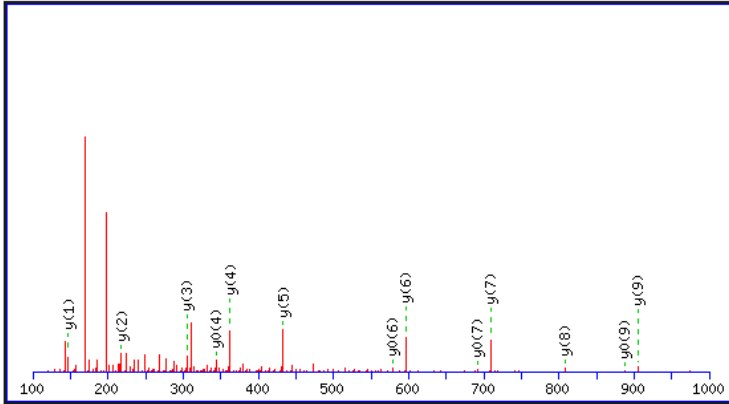

| #         | <b>b</b> | <b>b<sup>++</sup></b> | <b>b<sup>0</sup></b> | <b>b<sup>0++</sup></b> | Seq.     | <b>y</b>      | <b>y<sup>++</sup></b> | <b>y<sup>*</sup></b> | <b>y<sup>*++</sup></b> | <b>y<sup>0</sup></b> | <b>y<sup>0++</sup></b> | #         |
|-----------|----------|-----------------------|----------------------|------------------------|----------|---------------|-----------------------|----------------------|------------------------|----------------------|------------------------|-----------|
| <b>1</b>  | 58.03    | 29.52                 |                      |                        | <b>G</b> |               |                       |                      |                        |                      |                        | <b>12</b> |
| <b>2</b>  | 171.11   | 86.06                 |                      |                        | <b>L</b> | 1117.66       | 559.33                | 1100.63              | 550.82                 | 1099.65              | 550.33                 | <b>11</b> |
| <b>3</b>  | 270.18   | 135.59                |                      |                        | <b>V</b> | 1004.58       | 502.79                | 987.55               | 494.28                 | 986.57               | 493.79                 | <b>10</b> |
| <b>4</b>  | 367.23   | 184.12                |                      |                        | <b>P</b> | <b>905.51</b> | 453.26                | 888.48               | 444.74                 | <b>887.50</b>        | 444.25                 | <b>9</b>  |
| <b>5</b>  | 466.30   | 233.65                |                      |                        | <b>V</b> | <b>808.46</b> | 404.73                | 791.43               | 396.22                 | 790.45               | 395.73                 | <b>8</b>  |
| <b>6</b>  | 579.39   | 290.20                |                      |                        | <b>L</b> | <b>709.39</b> | 355.20                | 692.36               | 346.68                 | <b>691.38</b>        | 346.19                 | <b>7</b>  |
| <b>7</b>  | 742.45   | 371.73                |                      |                        | <b>Y</b> | <b>596.30</b> | 298.66                | 579.28               | 290.14                 | <b>578.29</b>        | 289.65                 | <b>6</b>  |
| <b>8</b>  | 813.49   | 407.25                |                      |                        | <b>A</b> | <b>433.24</b> | 217.12                | 416.21               | 208.61                 | 415.23               | 208.12                 | <b>5</b>  |
| <b>9</b>  | 870.51   | 435.76                |                      |                        | <b>G</b> | <b>362.20</b> | 181.61                | 345.18               | 173.09                 | <b>344.19</b>        | 172.60                 | <b>4</b>  |
| <b>10</b> | 957.54   | 479.27                | 939.53               | 470.27                 | <b>S</b> | <b>305.18</b> | 153.09                | 288.16               | 144.58                 | 287.17               | 144.09                 | <b>3</b>  |
| <b>11</b> | 1028.58  | 514.79                | 1010.57              | 505.79                 | <b>A</b> | <b>218.15</b> | 109.58                | 201.12               | 101.07                 |                      |                        | <b>2</b>  |
| <b>12</b> |          |                       |                      |                        | <b>K</b> | <b>147.11</b> | 74.06                 | 130.09               | 65.55                  |                      |                        | <b>1</b>  |



MS/MS Fragmentation of ID490 **VPVLETPDGPFI FESNAIAR**

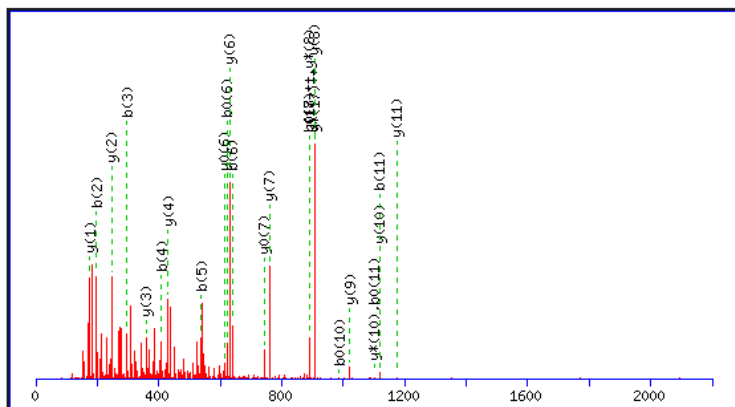

| #  | b       | b <sup>++</sup> | b <sup>*</sup> | b <sup>*++</sup> | b <sup>0</sup> | b <sup>0++</sup> | Seq. | y       | y <sup>++</sup> | y <sup>*</sup> | y <sup>*++</sup> | y <sup>0</sup> | y <sup>0++</sup> | #  |
|----|---------|-----------------|----------------|------------------|----------------|------------------|------|---------|-----------------|----------------|------------------|----------------|------------------|----|
| 1  | 100.08  | 50.54           |                |                  |                |                  | V    |         |                 |                |                  |                |                  | 19 |
| 2  | 197.13  | 99.07           |                |                  |                |                  | P    | 1926.00 | 963.50          | 1908.97        | 954.99           | 1907.99        | 954.50           | 18 |
| 3  | 296.20  | 148.60          |                |                  |                |                  | V    | 1828.94 | 914.98          | 1811.92        | 906.46           | 1810.93        | 905.97           | 17 |
| 4  | 409.28  | 205.14          |                |                  |                |                  | L    | 1729.88 | 865.44          | 1712.85        | 856.93           | 1711.86        | 856.44           | 16 |
| 5  | 538.32  | 269.67          |                |                  | 520.31         | 260.66           | E    | 1616.79 | 808.90          | 1599.76        | 800.39           | 1598.78        | 799.89           | 15 |
| 6  | 639.37  | 320.19          |                |                  | 621.36         | 311.18           | T    | 1487.75 | 744.38          | 1470.72        | 735.86           | 1469.74        | 735.37           | 14 |
| 7  | 736.42  | 368.72          |                |                  | 718.41         | 359.71           | P    | 1386.70 | 693.85          | 1369.67        | 685.34           | 1368.69        | 684.85           | 13 |
| 8  | 851.45  | 426.23          |                |                  | 833.44         | 417.22           | D    | 1289.65 | 645.33          | 1272.62        | 636.81           | 1271.64        | 636.32           | 12 |
| 9  | 908.47  | 454.74          |                |                  | 890.46         | 445.73           | G    | 1174.62 | 587.81          | 1157.59        | 579.30           | 1156.61        | 578.81           | 11 |
| 10 | 1005.53 | 503.27          |                |                  | 987.51         | 494.26           | P    | 1117.60 | 559.30          | 1100.57        | 550.79           | 1099.59        | 550.30           | 10 |
| 11 | 1118.61 | 559.81          |                |                  | 1100.60        | 550.80           | I    | 1020.55 | 510.78          | 1003.52        | 502.26           | 1002.54        | 501.77           | 9  |
| 12 | 1265.68 | 633.34          |                |                  | 1247.67        | 624.34           | F    | 907.46  | 454.24          | 890.44         | 445.72           | 889.45         | 445.23           | 8  |
| 13 | 1394.72 | 697.86          |                |                  | 1376.71        | 688.86           | E    | 760.39  | 380.70          | 743.37         | 372.19           | 742.38         | 371.70           | 7  |
| 14 | 1481.75 | 741.38          |                |                  | 1463.74        | 732.37           | S    | 631.35  | 316.18          | 614.33         | 307.67           | 613.34         | 307.17           | 6  |
| 15 | 1595.80 | 798.40          | 1578.77        | 789.89           | 1577.78        | 789.40           | N    | 544.32  | 272.66          | 527.29         | 264.15           |                |                  | 5  |
| 16 | 1666.83 | 833.92          | 1649.81        | 825.41           | 1648.82        | 824.91           | A    | 430.28  | 215.64          | 413.25         | 207.13           |                |                  | 4  |
| 17 | 1779.92 | 890.46          | 1762.89        | 881.95           | 1761.91        | 881.46           | I    | 359.24  | 180.12          | 342.21         | 171.61           |                |                  | 3  |
| 18 | 1850.95 | 925.98          | 1833.93        | 917.47           | 1832.94        | 916.98           | A    | 246.16  | 123.58          | 229.13         | 115.07           |                |                  | 2  |
| 19 |         |                 |                |                  |                |                  | R    | 175.12  | 88.06           | 158.09         | 79.55            |                |                  | 1  |

MS/MS Fragmentation of ID493 **VAEAMEVL**R

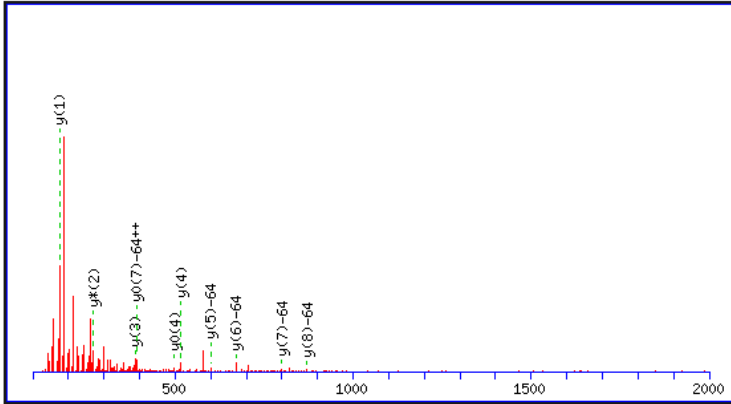

| #        | <b>b</b> | <b>b<sup>++</sup></b> | <b>b<sup>0</sup></b> | <b>b<sup>0++</sup></b> | Seq.     | <b>y</b>      | <b>y<sup>++</sup></b> | <b>y<sup>*</sup></b> | <b>y<sup>***</sup></b> | <b>y<sup>0</sup></b> | <b>y<sup>0++</sup></b> | #        |
|----------|----------|-----------------------|----------------------|------------------------|----------|---------------|-----------------------|----------------------|------------------------|----------------------|------------------------|----------|
| <b>1</b> | 100.08   | 50.54                 |                      |                        | <b>V</b> |               |                       |                      |                        |                      |                        | <b>9</b> |
| <b>2</b> | 171.11   | 86.06                 |                      |                        | <b>A</b> | <b>870.47</b> | 435.74                | 853.44               | 427.22                 | 852.46               | 426.73                 | <b>8</b> |
| <b>3</b> | 300.16   | 150.58                | 282.14               | 141.58                 | <b>E</b> | <b>799.43</b> | 400.22                | 782.40               | 391.71                 | 781.42               | <b>391.21</b>          | <b>7</b> |
| <b>4</b> | 371.19   | 186.10                | 353.18               | 177.09                 | <b>A</b> | <b>670.39</b> | 335.70                | 653.36               | 327.18                 | 652.38               | 326.69                 | <b>6</b> |
| <b>5</b> | 454.23   | 227.62                | 436.22               | 218.61                 | <b>M</b> | <b>599.35</b> | 300.18                | 582.32               | 291.67                 | 581.34               | 291.17                 | <b>5</b> |
| <b>6</b> | 583.27   | 292.14                | 565.26               | 283.13                 | <b>E</b> | <b>516.31</b> | 258.66                | 499.29               | 250.15                 | <b>498.30</b>        | 249.66                 | <b>4</b> |
| <b>7</b> | 682.34   | 341.67                | 664.33               | 332.67                 | <b>V</b> | <b>387.27</b> | 194.14                | 370.24               | 185.63                 |                      |                        | <b>3</b> |
| <b>8</b> | 795.42   | 398.22                | 777.41               | 389.21                 | <b>L</b> | 288.20        | 144.61                | <b>271.18</b>        | 136.09                 |                      |                        | <b>2</b> |
| <b>9</b> |          |                       |                      |                        | <b>R</b> | <b>175.12</b> | 88.06                 | 158.09               | 79.55                  |                      |                        | <b>1</b> |

MS/MS Fragmentation of ID496 **AYGELPENTR**

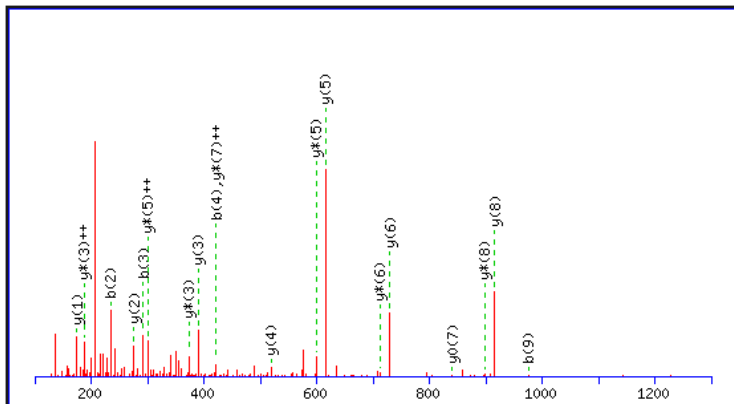

| #         | b             | b <sup>++</sup> | b <sup>*</sup> | b <sup>*++</sup> | b <sup>0</sup> | b <sup>0++</sup> | Seq.     | y             | y <sup>++</sup> | y <sup>*</sup> | y <sup>*++</sup> | y <sup>0</sup> | y <sup>0++</sup> | #         |
|-----------|---------------|-----------------|----------------|------------------|----------------|------------------|----------|---------------|-----------------|----------------|------------------|----------------|------------------|-----------|
| <b>1</b>  | 72.04         | 36.53           |                |                  |                |                  | <b>A</b> |               |                 |                |                  |                |                  | <b>10</b> |
| <b>2</b>  | <b>235.11</b> | 118.06          |                |                  |                |                  | <b>Y</b> | 1078.52       | 539.76          | 1061.49        | 531.25           | 1060.51        | 530.76           | <b>9</b>  |
| <b>3</b>  | <b>292.13</b> | 146.57          |                |                  |                |                  | <b>G</b> | <b>915.45</b> | 458.23          | <b>898.43</b>  | 449.72           | 897.44         | 449.22           | <b>8</b>  |
| <b>4</b>  | <b>421.17</b> | 211.09          |                |                  | 403.16         | 202.08           | <b>E</b> | 858.43        | 429.72          | 841.41         | <b>421.21</b>    | <b>840.42</b>  | 420.71           | <b>7</b>  |
| <b>5</b>  | 534.26        | 267.63          |                |                  | 516.25         | 258.63           | <b>L</b> | <b>729.39</b> | 365.20          | <b>712.36</b>  | 356.68           | 711.38         | 356.19           | <b>6</b>  |
| <b>6</b>  | 631.31        | 316.16          |                |                  | 613.30         | 307.15           | <b>P</b> | <b>616.30</b> | 308.66          | <b>599.28</b>  | <b>300.14</b>    | 598.29         | 299.65           | <b>5</b>  |
| <b>7</b>  | 760.35        | 380.68          |                |                  | 742.34         | 371.67           | <b>E</b> | <b>519.25</b> | 260.13          | 502.23         | 251.62           | 501.24         | 251.12           | <b>4</b>  |
| <b>8</b>  | 874.39        | 437.70          | 857.37         | 429.19           | 856.38         | 428.70           | <b>N</b> | <b>390.21</b> | 195.61          | <b>373.18</b>  | <b>187.10</b>    | 372.20         | 186.60           | <b>3</b>  |
| <b>9</b>  | <b>975.44</b> | 488.22          | 958.42         | 479.71           | 957.43         | 479.22           | <b>T</b> | <b>276.17</b> | 138.59          | 259.14         | 130.07           | 258.16         | 129.58           | <b>2</b>  |
| <b>10</b> |               |                 |                |                  |                |                  | <b>R</b> | <b>175.12</b> | 88.06           | 158.09         | 79.55            |                |                  | <b>1</b>  |

MS/MS Fragmentation of ID503 **QSVLGAITSAQQR**

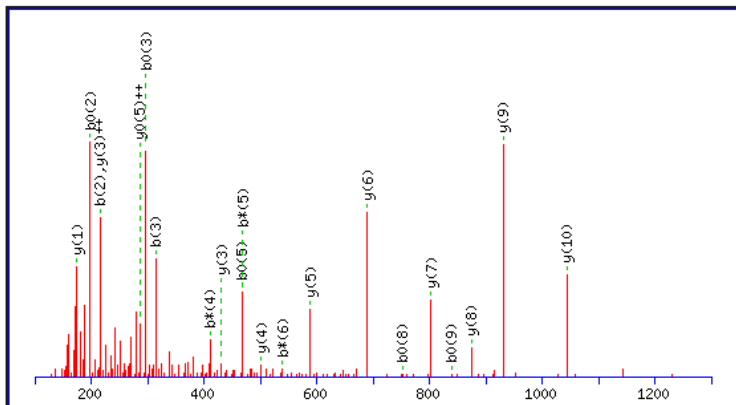

| #  | b             | b <sup>++</sup> | b*            | b <sup>*++</sup> | b <sup>0</sup> | b <sup>0++</sup> | Seq. | y              | y <sup>++</sup> | y*            | y <sup>*++</sup> | y <sup>0</sup> | y <sup>0++</sup> | #  |
|----|---------------|-----------------|---------------|------------------|----------------|------------------|------|----------------|-----------------|---------------|------------------|----------------|------------------|----|
| 1  | 129.07        | 65.04           | 112.04        | 56.52            |                |                  | Q    |                |                 |               |                  |                |                  | 13 |
| 2  | <b>216.10</b> | 108.55          | 199.07        | 100.04           | <b>198.09</b>  | 99.55            | S    | 1230.68        | 615.84          | 1213.65       | 607.33           | 1212.67        | 606.84           | 12 |
| 3  | <b>315.17</b> | 158.09          | 298.14        | 149.57           | <b>297.16</b>  | 149.08           | V    | 1143.65        | 572.33          | 1126.62       | 563.81           | 1125.64        | 563.32           | 11 |
| 4  | 428.25        | 214.63          | <b>411.22</b> | 206.12           | 410.24         | 205.62           | L    | <b>1044.58</b> | 522.79          | 1027.55       | 514.28           | 1026.57        | 513.79           | 10 |
| 5  | 485.27        | 243.14          | <b>468.25</b> | 234.63           | <b>467.26</b>  | 234.13           | G    | <b>931.50</b>  | 466.25          | 914.47        | 457.74           | 913.48         | 457.25           | 9  |
| 6  | 556.31        | 278.66          | <b>539.28</b> | 270.14           | 538.30         | 269.65           | A    | <b>874.47</b>  | 437.74          | 857.45        | 429.23           | 856.46         | 428.74           | 8  |
| 7  | 669.39        | 335.20          | 652.37        | 326.69           | 651.38         | 326.19           | I    | <b>803.44</b>  | 402.22          | 786.41        | 393.71           | 785.43         | 393.22           | 7  |
| 8  | 770.44        | 385.72          | 753.41        | 377.21           | <b>752.43</b>  | 376.72           | T    | <b>690.35</b>  | 345.68          | 673.33        | 337.17           | 672.34         | 336.67           | 6  |
| 9  | 857.47        | 429.24          | 840.45        | 420.73           | <b>839.46</b>  | 420.23           | S    | <b>589.31</b>  | 295.16          | 572.28        | 286.64           | 571.29         | <b>286.15</b>    | 5  |
| 10 | 928.51        | 464.76          | 911.48        | 456.25           | 910.50         | 455.75           | A    | <b>502.27</b>  | 251.64          | 485.25        | 243.13           |                |                  | 4  |
| 11 | 1056.57       | 528.79          | 1039.54       | 520.27           | 1038.56        | 519.78           | Q    | <b>431.24</b>  | <b>216.12</b>   | 414.21        | 207.61           |                |                  | 3  |
| 12 | 1184.63       | 592.82          | 1167.60       | 584.30           | 1166.62        | 583.81           | Q    | 303.18         | 152.09          | <b>286.15</b> | 143.58           |                |                  | 2  |
| 13 |               |                 |               |                  |                |                  | R    | <b>175.12</b>  | 88.06           | 158.09        | 79.55            |                |                  | 1  |

MS/MS Fragmentation of ID504 **NSLPDQVVVQR**

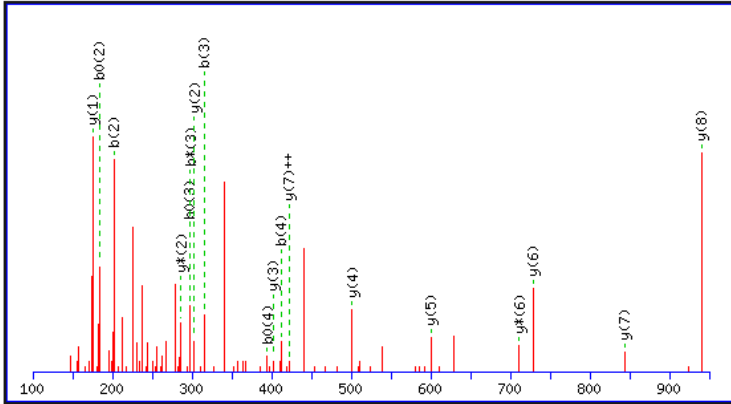

| #  | <b>b</b>      | <b>b<sup>++</sup></b> | <b>b<sup>*</sup></b> | <b>b<sup>*++</sup></b> | <b>b<sup>0</sup></b> | <b>b<sup>0++</sup></b> | Seq. | <b>y</b>      | <b>y<sup>++</sup></b> | <b>y<sup>*</sup></b> | <b>y<sup>*++</sup></b> | <b>y<sup>0</sup></b> | <b>y<sup>0++</sup></b> | #  |
|----|---------------|-----------------------|----------------------|------------------------|----------------------|------------------------|------|---------------|-----------------------|----------------------|------------------------|----------------------|------------------------|----|
| 1  | 115.05        | 58.03                 | 98.02                | 49.52                  |                      |                        | N    |               |                       |                      |                        |                      |                        | 11 |
| 2  | <b>202.08</b> | 101.54                | 185.06               | 93.03                  | <b>184.07</b>        | 92.54                  | S    | 1140.64       | 570.82                | 1123.61              | 562.31                 | 1122.63              | 561.82                 | 10 |
| 3  | <b>315.17</b> | 158.09                | <b>298.14</b>        | 149.57                 | <b>297.16</b>        | 149.08                 | L    | 1053.61       | 527.31                | 1036.58              | 518.79                 | 1035.59              | 518.30                 | 9  |
| 4  | <b>412.22</b> | 206.61                | 395.19               | 198.10                 | <b>394.21</b>        | 197.61                 | P    | <b>940.52</b> | 470.76                | 923.49               | 462.25                 | 922.51               | 461.76                 | 8  |
| 5  | 527.25        | 264.13                | 510.22               | 255.61                 | 509.24               | 255.12                 | D    | <b>843.47</b> | <b>422.24</b>         | 826.44               | 413.72                 | 825.46               | 413.23                 | 7  |
| 6  | 655.30        | 328.16                | 638.28               | 319.64                 | 637.29               | 319.15                 | Q    | <b>728.44</b> | 364.72                | <b>711.41</b>        | 356.21                 |                      |                        | 6  |
| 7  | 754.37        | 377.69                | 737.35               | 369.18                 | 736.36               | 368.68                 | V    | <b>600.38</b> | 300.70                | 583.36               | 292.18                 |                      |                        | 5  |
| 8  | 853.44        | 427.22                | 836.41               | 418.71                 | 835.43               | 418.22                 | V    | <b>501.31</b> | 251.16                | 484.29               | 242.65                 |                      |                        | 4  |
| 9  | 952.51        | 476.76                | 935.48               | 468.25                 | 934.50               | 467.75                 | V    | <b>402.25</b> | 201.63                | 385.22               | 193.11                 |                      |                        | 3  |
| 10 | 1080.57       | 540.79                | 1063.54              | 532.27                 | 1062.56              | 531.78                 | Q    | <b>303.18</b> | 152.09                | <b>286.15</b>        | 143.58                 |                      |                        | 2  |
| 11 |               |                       |                      |                        |                      |                        | R    | <b>175.12</b> | 88.06                 | 158.09               | 79.55                  |                      |                        | 1  |

MS/MS Fragmentation of ID506 **TQIIDLFNQDK**

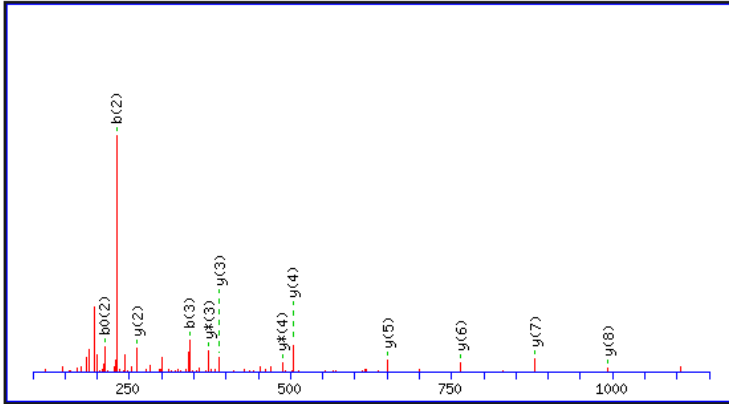

| #  | b             | b <sup>++</sup> | b*      | b <sup>*++</sup> | b <sup>0</sup> | b <sup>0++</sup> | Seq. | y             | y <sup>++</sup> | y*            | y <sup>*++</sup> | y <sup>0</sup> | y <sup>0++</sup> | #  |
|----|---------------|-----------------|---------|------------------|----------------|------------------|------|---------------|-----------------|---------------|------------------|----------------|------------------|----|
| 1  | 102.05        | 51.53           |         |                  | 84.04          | 42.53            | T    |               |                 |               |                  |                |                  | 11 |
| 2  | <b>230.11</b> | 115.56          | 213.09  | 107.05           | <b>212.10</b>  | 106.56           | Q    | 1233.65       | 617.33          | 1216.62       | 608.81           | 1215.64        | 608.32           | 10 |
| 3  | <b>343.20</b> | 172.10          | 326.17  | 163.59           | 325.19         | 163.10           | I    | 1105.59       | 553.30          | 1088.56       | 544.78           | 1087.58        | 544.29           | 9  |
| 4  | 456.28        | 228.64          | 439.26  | 220.13           | 438.27         | 219.64           | I    | <b>992.50</b> | 496.76          | 975.48        | 488.24           | 974.49         | 487.75           | 8  |
| 5  | 571.31        | 286.16          | 554.28  | 277.64           | 553.30         | 277.15           | D    | <b>879.42</b> | 440.21          | 862.39        | 431.70           | 861.41         | 431.21           | 7  |
| 6  | 684.39        | 342.70          | 667.37  | 334.19           | 666.38         | 333.69           | L    | <b>764.39</b> | 382.70          | 747.37        | 374.19           | 746.38         | 373.70           | 6  |
| 7  | 831.46        | 416.23          | 814.43  | 407.72           | 813.45         | 407.23           | F    | <b>651.31</b> | 326.16          | 634.28        | 317.65           | 633.30         | 317.15           | 5  |
| 8  | 945.50        | 473.26          | 928.48  | 464.74           | 927.49         | 464.25           | N    | <b>504.24</b> | 252.62          | <b>487.21</b> | 244.11           | 486.23         | 243.62           | 4  |
| 9  | 1073.56       | 537.28          | 1056.54 | 528.77           | 1055.55        | 528.28           | Q    | <b>390.20</b> | 195.60          | <b>373.17</b> | 187.09           | 372.19         | 186.60           | 3  |
| 10 | 1188.59       | 594.80          | 1171.56 | 586.29           | 1170.58        | 585.79           | D    | <b>262.14</b> | 131.57          | 245.11        | 123.06           | 244.13         | 122.57           | 2  |
| 11 |               |                 |         |                  |                |                  | K    | 147.11        | 74.06           | 130.09        | 65.55            |                |                  | 1  |

MS/MS Fragmentation of ID507 **VATELELWQEAFR**

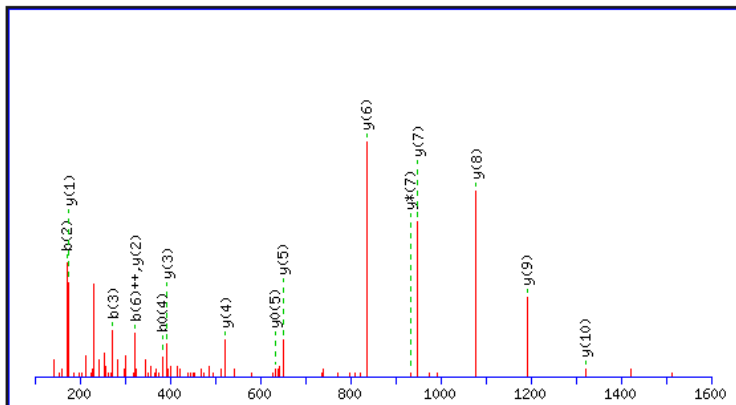

| #  | b       | b <sup>++</sup> | b <sup>*</sup> | b <sup>*++</sup> | b <sup>0</sup> | b <sup>0++</sup> | Seq. | y       | y <sup>++</sup> | y <sup>*</sup> | y <sup>*++</sup> | y <sup>0</sup> | y <sup>0++</sup> | #  |
|----|---------|-----------------|----------------|------------------|----------------|------------------|------|---------|-----------------|----------------|------------------|----------------|------------------|----|
| 1  | 100.08  | 50.54           |                |                  |                |                  | V    |         |                 |                |                  |                |                  | 13 |
| 2  | 171.11  | 86.06           |                |                  |                |                  | A    | 1492.74 | 746.88          | 1475.72        | 738.36           | 1474.73        | 737.87           | 12 |
| 3  | 272.16  | 136.58          |                |                  | 254.15         | 127.58           | T    | 1421.71 | 711.36          | 1404.68        | 702.84           | 1403.70        | 702.35           | 11 |
| 4  | 401.20  | 201.11          |                |                  | 383.19         | 192.10           | E    | 1320.66 | 660.83          | 1303.63        | 652.32           | 1302.65        | 651.83           | 10 |
| 5  | 514.29  | 257.65          |                |                  | 496.28         | 248.64           | L    | 1191.62 | 596.31          | 1174.59        | 587.80           | 1173.61        | 587.31           | 9  |
| 6  | 643.33  | 322.17          |                |                  | 625.32         | 313.16           | E    | 1078.53 | 539.77          | 1061.51        | 531.26           | 1060.52        | 530.76           | 8  |
| 7  | 756.41  | 378.71          |                |                  | 738.40         | 369.71           | L    | 949.49  | 475.25          | 932.46         | 466.73           | 931.48         | 466.24           | 7  |
| 8  | 942.49  | 471.75          |                |                  | 924.48         | 462.74           | W    | 836.40  | 418.71          | 819.38         | 410.19           | 818.39         | 409.70           | 6  |
| 9  | 1070.55 | 535.78          | 1053.53        | 527.27           | 1052.54        | 526.77           | Q    | 650.33  | 325.67          | 633.30         | 317.15           | 632.32         | 316.66           | 5  |
| 10 | 1199.59 | 600.30          | 1182.57        | 591.79           | 1181.58        | 591.30           | E    | 522.27  | 261.64          | 505.24         | 253.12           | 504.26         | 252.63           | 4  |
| 11 | 1270.63 | 635.82          | 1253.60        | 627.31           | 1252.62        | 626.81           | A    | 393.22  | 197.12          | 376.20         | 188.60           |                |                  | 3  |
| 12 | 1417.70 | 709.35          | 1400.67        | 700.84           | 1399.69        | 700.35           | F    | 322.19  | 161.60          | 305.16         | 153.08           |                |                  | 2  |
| 13 |         |                 |                |                  |                |                  | R    | 175.12  | 88.06           | 158.09         | 79.55            |                |                  | 1  |

MS/MS Fragmentation of ID508 **VATELELWQEA**FR

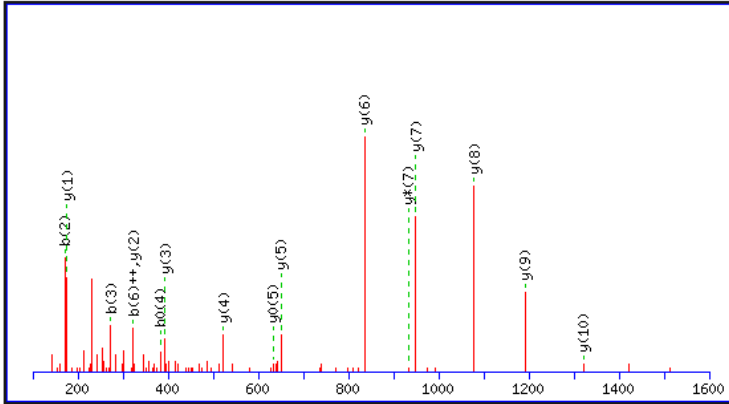

| #  | b       | b <sup>++</sup> | b <sup>*</sup> | b <sup>*++</sup> | b <sup>0</sup> | b <sup>0++</sup> | Seq. | y       | y <sup>++</sup> | y <sup>*</sup> | y <sup>*++</sup> | y <sup>0</sup> | y <sup>0++</sup> | #  |
|----|---------|-----------------|----------------|------------------|----------------|------------------|------|---------|-----------------|----------------|------------------|----------------|------------------|----|
| 1  | 100.08  | 50.54           |                |                  |                |                  | V    |         |                 |                |                  |                |                  | 13 |
| 2  | 171.11  | 86.06           |                |                  |                |                  | A    | 1492.74 | 746.88          | 1475.72        | 738.36           | 1474.73        | 737.87           | 12 |
| 3  | 272.16  | 136.58          |                |                  | 254.15         | 127.58           | T    | 1421.71 | 711.36          | 1404.68        | 702.84           | 1403.70        | 702.35           | 11 |
| 4  | 401.20  | 201.11          |                |                  | 383.19         | 192.10           | E    | 1320.66 | 660.83          | 1303.63        | 652.32           | 1302.65        | 651.83           | 10 |
| 5  | 514.29  | 257.65          |                |                  | 496.28         | 248.64           | L    | 1191.62 | 596.31          | 1174.59        | 587.80           | 1173.61        | 587.31           | 9  |
| 6  | 643.33  | 322.17          |                |                  | 625.32         | 313.16           | E    | 1078.53 | 539.77          | 1061.51        | 531.26           | 1060.52        | 530.76           | 8  |
| 7  | 756.41  | 378.71          |                |                  | 738.40         | 369.71           | L    | 949.49  | 475.25          | 932.46         | 466.73           | 931.48         | 466.24           | 7  |
| 8  | 942.49  | 471.75          |                |                  | 924.48         | 462.74           | W    | 836.40  | 418.71          | 819.38         | 410.19           | 818.39         | 409.70           | 6  |
| 9  | 1070.55 | 535.78          | 1053.53        | 527.27           | 1052.54        | 526.77           | Q    | 650.33  | 325.67          | 633.30         | 317.15           | 632.32         | 316.66           | 5  |
| 10 | 1199.59 | 600.30          | 1182.57        | 591.79           | 1181.58        | 591.30           | E    | 522.27  | 261.64          | 505.24         | 253.12           | 504.26         | 252.63           | 4  |
| 11 | 1270.63 | 635.82          | 1253.60        | 627.31           | 1252.62        | 626.81           | A    | 393.22  | 197.12          | 376.20         | 188.60           |                |                  | 3  |
| 12 | 1417.70 | 709.35          | 1400.67        | 700.84           | 1399.69        | 700.35           | F    | 322.19  | 161.60          | 305.16         | 153.08           |                |                  | 2  |
| 13 |         |                 |                |                  |                |                  | R    | 175.12  | 88.06           | 158.09         | 79.55            |                |                  | 1  |



MS/MS Fragmentation of ID528 **AQIWDTAGQER**

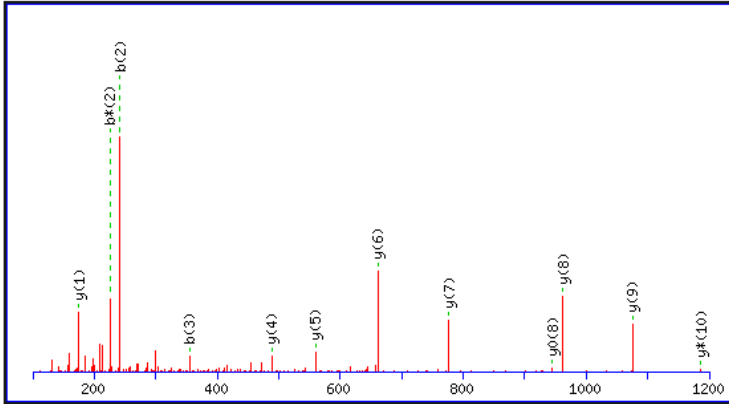

| #  | b             | b <sup>++</sup> | b*            | b <sup>*++</sup> | b <sup>0</sup> | b <sup>0++</sup> | Seq. | y              | y <sup>++</sup> | y*             | y <sup>*++</sup> | y <sup>0</sup> | y <sup>0++</sup> | #  |
|----|---------------|-----------------|---------------|------------------|----------------|------------------|------|----------------|-----------------|----------------|------------------|----------------|------------------|----|
| 1  | 114.05        | 57.53           |               |                  |                |                  | A    |                |                 |                |                  |                |                  | 11 |
| 2  | <b>242.11</b> | 121.56          | <b>225.09</b> | 113.05           |                |                  | Q    | 1203.58        | 602.29          | <b>1186.55</b> | 593.78           | 1185.56        | 593.29           | 10 |
| 3  | <b>355.20</b> | 178.10          | 338.17        | 169.59           |                |                  | I    | <b>1075.52</b> | 538.26          | 1058.49        | 529.75           | 1057.51        | 529.26           | 9  |
| 4  | 541.28        | 271.14          | 524.25        | 262.63           |                |                  | W    | <b>962.43</b>  | 481.72          | 945.41         | 473.21           | <b>944.42</b>  | 472.71           | 8  |
| 5  | 656.30        | 328.66          | 639.28        | 320.14           | 638.29         | 319.65           | D    | <b>776.35</b>  | 388.68          | 759.33         | 380.17           | 758.34         | 379.68           | 7  |
| 6  | 757.35        | 379.18          | 740.32        | 370.67           | 739.34         | 370.17           | T    | <b>661.33</b>  | 331.17          | 644.30         | 322.65           | 643.32         | 322.16           | 6  |
| 7  | 828.39        | 414.70          | 811.36        | 406.18           | 810.38         | 405.69           | A    | <b>560.28</b>  | 280.64          | 543.25         | 272.13           | 542.27         | 271.64           | 5  |
| 8  | 885.41        | 443.21          | 868.38        | 434.70           | 867.40         | 434.20           | G    | <b>489.24</b>  | 245.12          | 472.22         | 236.61           | 471.23         | 236.12           | 4  |
| 9  | 1013.47       | 507.24          | 996.44        | 498.72           | 995.46         | 498.23           | Q    | 432.22         | 216.61          | 415.19         | 208.10           | 414.21         | 207.61           | 3  |
| 10 | 1142.51       | 571.76          | 1125.48       | 563.25           | 1124.50        | 562.75           | E    | 304.16         | 152.58          | 287.13         | 144.07           | 286.15         | 143.58           | 2  |
| 11 |               |                 |               |                  |                |                  | R    | <b>175.12</b>  | 88.06           | 158.09         | 79.55            |                |                  | 1  |

MS/MS Fragmentation of ID549 **TYVVQDGDIIFFK**

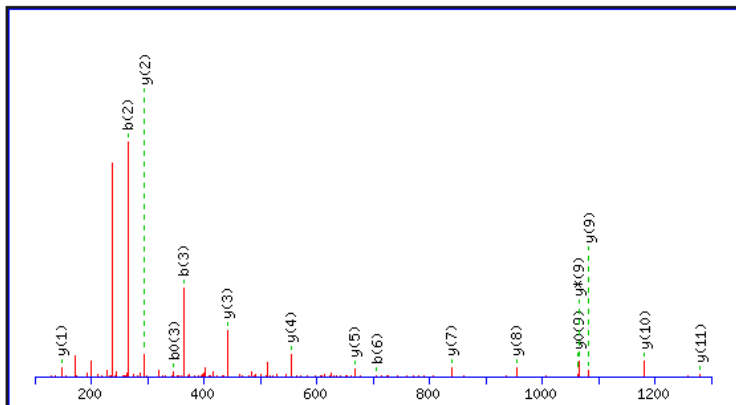

| #  | b             | b <sup>++</sup> | b <sup>*</sup> | b <sup>*++</sup> | b <sup>0</sup> | b <sup>0++</sup> | Seq. | y              | y <sup>++</sup> | y <sup>*</sup> | y <sup>*++</sup> | y <sup>0</sup> | y <sup>0++</sup> | #  |
|----|---------------|-----------------|----------------|------------------|----------------|------------------|------|----------------|-----------------|----------------|------------------|----------------|------------------|----|
| 1  | 102.05        | 51.53           |                |                  | 84.04          | 42.53            | T    |                |                 |                |                  |                |                  | 13 |
| 2  | <b>265.12</b> | 133.06          |                |                  | 247.11         | 124.06           | Y    | 1443.75        | 722.38          | 1426.73        | 713.87           | 1425.74        | 713.37           | 12 |
| 3  | <b>364.19</b> | 182.60          |                |                  | <b>346.18</b>  | 173.59           | V    | <b>1280.69</b> | 640.85          | 1263.66        | 632.33           | 1262.68        | 631.84           | 11 |
| 4  | 463.26        | 232.13          |                |                  | 445.24         | 223.13           | V    | <b>1181.62</b> | 591.31          | 1164.59        | 582.80           | 1163.61        | 582.31           | 10 |
| 5  | 591.31        | 296.16          | 574.29         | 287.65           | 573.30         | 287.16           | Q    | <b>1082.55</b> | 541.78          | <b>1065.53</b> | 533.27           | <b>1064.54</b> | 532.77           | 9  |
| 6  | <b>706.34</b> | 353.67          | 689.31         | 345.16           | 688.33         | 344.67           | D    | <b>954.49</b>  | 477.75          | 937.47         | 469.24           | 936.48         | 468.74           | 8  |
| 7  | 763.36        | 382.18          | 746.34         | 373.67           | 745.35         | 373.18           | G    | <b>839.47</b>  | 420.24          | 822.44         | 411.72           | 821.46         | 411.23           | 7  |
| 8  | 878.39        | 439.70          | 861.36         | 431.18           | 860.38         | 430.69           | D    | 782.44         | 391.73          | 765.42         | 383.21           | 764.43         | 382.72           | 6  |
| 9  | 991.47        | 496.24          | 974.45         | 487.73           | 973.46         | 487.23           | I    | <b>667.42</b>  | 334.21          | 650.39         | 325.70           |                |                  | 5  |
| 10 | 1104.56       | 552.78          | 1087.53        | 544.27           | 1086.55        | 543.78           | I    | <b>554.33</b>  | 277.67          | 537.31         | 269.16           |                |                  | 4  |
| 11 | 1251.63       | 626.32          | 1234.60        | 617.80           | 1233.61        | 617.31           | F    | <b>441.25</b>  | 221.13          | 424.22         | 212.62           |                |                  | 3  |
| 12 | 1398.69       | 699.85          | 1381.67        | 691.34           | 1380.68        | 690.85           | F    | <b>294.18</b>  | 147.59          | 277.15         | 139.08           |                |                  | 2  |
| 13 |               |                 |                |                  |                |                  | K    | <b>147.11</b>  | 74.06           | 130.09         | 65.55            |                |                  | 1  |

MS/MS Fragmentation of ID550 **ELAQEIETLWR**

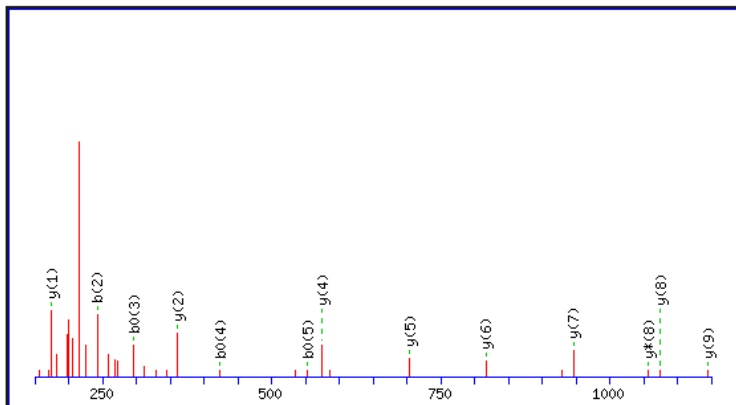

| #         | <b>b</b>      | <b>b<sup>++</sup></b> | <b>b<sup>*</sup></b> | <b>b<sup>*++</sup></b> | <b>b<sup>0</sup></b> | <b>b<sup>0++</sup></b> | Seq.     | <b>y</b>       | <b>y<sup>++</sup></b> | <b>y<sup>*</sup></b> | <b>y<sup>*++</sup></b> | <b>y<sup>0</sup></b> | <b>y<sup>0++</sup></b> | #         |
|-----------|---------------|-----------------------|----------------------|------------------------|----------------------|------------------------|----------|----------------|-----------------------|----------------------|------------------------|----------------------|------------------------|-----------|
| <b>1</b>  | 130.05        | 65.53                 |                      |                        | 112.04               | 56.52                  | <b>E</b> |                |                       |                      |                        |                      |                        | <b>11</b> |
| <b>2</b>  | <b>243.13</b> | 122.07                |                      |                        | 225.12               | 113.07                 | <b>L</b> | 1258.68        | 629.84                | 1241.65              | 621.33                 | 1240.67              | 620.84                 | <b>10</b> |
| <b>3</b>  | 314.17        | 157.59                |                      |                        | <b>296.16</b>        | 148.58                 | <b>A</b> | <b>1145.59</b> | 573.30                | 1128.57              | 564.79                 | 1127.58              | 564.30                 | <b>9</b>  |
| <b>4</b>  | 442.23        | 221.62                | 425.20               | 213.11                 | <b>424.22</b>        | 212.61                 | <b>Q</b> | <b>1074.56</b> | 537.78                | <b>1057.53</b>       | 529.27                 | 1056.55              | 528.78                 | <b>8</b>  |
| <b>5</b>  | 571.27        | 286.14                | 554.25               | 277.63                 | <b>553.26</b>        | 277.13                 | <b>E</b> | <b>946.50</b>  | 473.75                | 929.47               | 465.24                 | 928.49               | 464.75                 | <b>7</b>  |
| <b>6</b>  | 684.36        | 342.68                | 667.33               | 334.17                 | 666.35               | 333.68                 | <b>I</b> | <b>817.46</b>  | 409.23                | 800.43               | 400.72                 | 799.45               | 400.23                 | <b>6</b>  |
| <b>7</b>  | 813.40        | 407.20                | 796.37               | 398.69                 | 795.39               | 398.20                 | <b>E</b> | <b>704.37</b>  | 352.69                | 687.35               | 344.18                 | 686.36               | 343.68                 | <b>5</b>  |
| <b>8</b>  | 914.45        | 457.73                | 897.42               | 449.21                 | 896.44               | 448.72                 | <b>T</b> | <b>575.33</b>  | 288.17                | 558.30               | 279.66                 | 557.32               | 279.16                 | <b>4</b>  |
| <b>9</b>  | 1027.53       | 514.27                | 1010.50              | 505.76                 | 1009.52              | 505.26                 | <b>L</b> | 474.28         | 237.64                | 457.26               | 229.13                 |                      |                        | <b>3</b>  |
| <b>10</b> | 1213.61       | 607.31                | 1196.58              | 598.80                 | 1195.60              | 598.30                 | <b>W</b> | <b>361.20</b>  | 181.10                | 344.17               | 172.59                 |                      |                        | <b>2</b>  |
| <b>11</b> |               |                       |                      |                        |                      |                        | <b>R</b> | <b>175.12</b>  | 88.06                 | 158.09               | 79.55                  |                      |                        | <b>1</b>  |

MS/MS Fragmentation of ID555 **EQVFILGR**

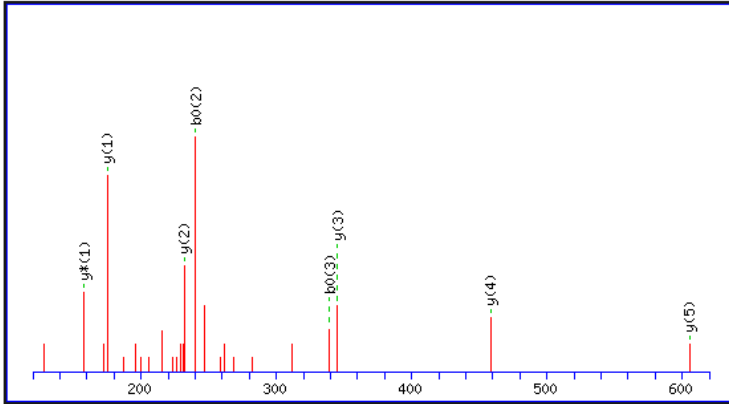

| #        | <b>b</b> | <b>b<sup>++</sup></b> | <b>b<sup>*</sup></b> | <b>b<sup>*++</sup></b> | <b>b<sup>0</sup></b> | <b>b<sup>0++</sup></b> | Seq.     | <b>y</b>      | <b>y<sup>++</sup></b> | <b>y<sup>*</sup></b> | <b>y<sup>*++</sup></b> | #        |
|----------|----------|-----------------------|----------------------|------------------------|----------------------|------------------------|----------|---------------|-----------------------|----------------------|------------------------|----------|
| <b>1</b> | 130.05   | 65.53                 |                      |                        | 112.04               | 56.52                  | <b>E</b> |               |                       |                      |                        | <b>8</b> |
| <b>2</b> | 258.11   | 129.56                | 241.08               | 121.04                 | <b>240.10</b>        | 120.55                 | <b>Q</b> | 832.50        | 416.76                | 815.48               | 408.24                 | <b>7</b> |
| <b>3</b> | 357.18   | 179.09                | 340.15               | 170.58                 | <b>339.17</b>        | 170.09                 | <b>V</b> | 704.45        | 352.73                | 687.42               | 344.21                 | <b>6</b> |
| <b>4</b> | 504.25   | 252.63                | 487.22               | 244.11                 | 486.23               | 243.62                 | <b>F</b> | <b>605.38</b> | 303.19                | 588.35               | 294.68                 | <b>5</b> |
| <b>5</b> | 617.33   | 309.17                | 600.30               | 300.66                 | 599.32               | 300.16                 | <b>I</b> | <b>458.31</b> | 229.66                | 441.28               | 221.14                 | <b>4</b> |
| <b>6</b> | 730.41   | 365.71                | 713.39               | 357.20                 | 712.40               | 356.71                 | <b>L</b> | <b>345.22</b> | 173.12                | 328.20               | 164.60                 | <b>3</b> |
| <b>7</b> | 787.43   | 394.22                | 770.41               | 385.71                 | 769.42               | 385.22                 | <b>G</b> | <b>232.14</b> | 116.57                | 215.11               | 108.06                 | <b>2</b> |
| <b>8</b> |          |                       |                      |                        |                      |                        | <b>R</b> | <b>175.12</b> | 88.06                 | <b>158.09</b>        | 79.55                  | <b>1</b> |

MS/MS Fragmentation of ID559 **GIELPNFLPR**

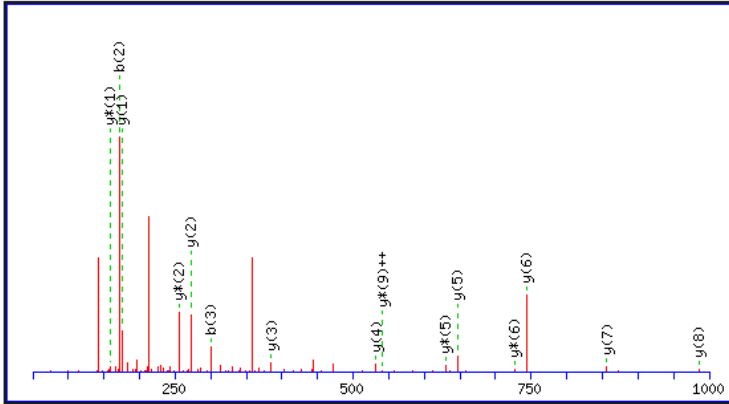

| #  | b      | b <sup>++</sup> | b <sup>*</sup> | b <sup>+++</sup> | b <sup>0</sup> | b <sup>0++</sup> | Seq. | y       | y <sup>++</sup> | y <sup>*</sup> | y <sup>+++</sup> | y <sup>0</sup> | y <sup>0++</sup> | #  |
|----|--------|-----------------|----------------|------------------|----------------|------------------|------|---------|-----------------|----------------|------------------|----------------|------------------|----|
| 1  | 58.03  | 29.52           |                |                  |                |                  | G    |         |                 |                |                  |                |                  | 10 |
| 2  | 171.11 | 86.06           |                |                  |                |                  | I    | 1098.63 | 549.82          | 1081.60        | 541.31           | 1080.62        | 540.81           | 9  |
| 3  | 300.16 | 150.58          |                |                  | 282.14         | 141.58           | E    | 985.55  | 493.28          | 968.52         | 484.76           | 967.54         | 484.27           | 8  |
| 4  | 413.24 | 207.12          |                |                  | 395.23         | 198.12           | L    | 856.50  | 428.76          | 839.48         | 420.24           |                |                  | 7  |
| 5  | 510.29 | 255.65          |                |                  | 492.28         | 246.64           | P    | 743.42  | 372.21          | 726.39         | 363.70           |                |                  | 6  |
| 6  | 624.34 | 312.67          | 607.31         | 304.16           | 606.32         | 303.67           | N    | 646.37  | 323.69          | 629.34         | 315.17           |                |                  | 5  |
| 7  | 771.40 | 386.21          | 754.38         | 377.69           | 753.39         | 377.20           | F    | 532.32  | 266.67          | 515.30         | 258.15           |                |                  | 4  |
| 8  | 884.49 | 442.75          | 867.46         | 434.23           | 866.48         | 433.74           | L    | 385.26  | 193.13          | 368.23         | 184.62           |                |                  | 3  |
| 9  | 981.54 | 491.27          | 964.51         | 482.76           | 963.53         | 482.27           | P    | 272.17  | 136.59          | 255.15         | 128.08           |                |                  | 2  |
| 10 |        |                 |                |                  |                |                  | R    | 175.12  | 88.06           | 158.09         | 79.55            |                |                  | 1  |

MS/MS Fragmentation of ID560 **GIQLPNFLPR**

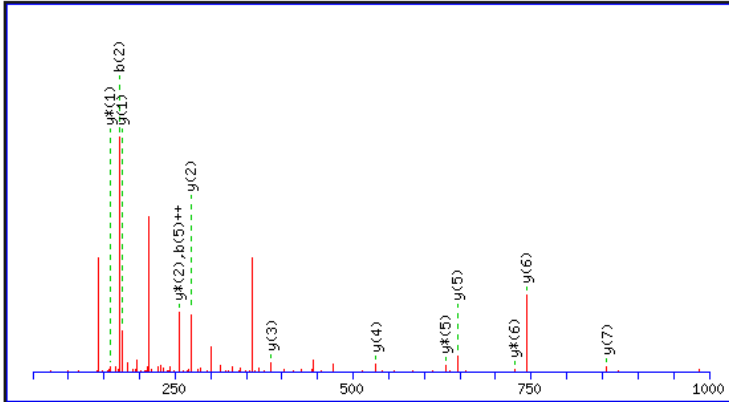

| #         | b             | b <sup>++</sup> | b <sup>*</sup> | b <sup>*++</sup> | Seq.     | y             | y <sup>++</sup> | y <sup>*</sup> | y <sup>*++</sup> | #         |
|-----------|---------------|-----------------|----------------|------------------|----------|---------------|-----------------|----------------|------------------|-----------|
| 1         | 58.03         | 29.52           |                |                  | <b>G</b> |               |                 |                |                  | <b>10</b> |
| 2         | <b>171.11</b> | 86.06           |                |                  | <b>I</b> | 1097.65       | 549.33          | 1080.62        | 540.81           | <b>9</b>  |
| 3         | 299.17        | 150.09          | 282.14         | 141.58           | <b>Q</b> | 984.56        | 492.78          | 967.54         | 484.27           | <b>8</b>  |
| 4         | 412.26        | 206.63          | 395.23         | 198.12           | <b>L</b> | <b>856.50</b> | 428.76          | 839.48         | 420.24           | <b>7</b>  |
| 5         | 509.31        | <b>255.16</b>   | 492.28         | 246.64           | <b>P</b> | <b>743.42</b> | 372.21          | <b>726.39</b>  | 363.70           | <b>6</b>  |
| 6         | 623.35        | 312.18          | 606.32         | 303.67           | <b>N</b> | <b>646.37</b> | 323.69          | <b>629.34</b>  | 315.17           | <b>5</b>  |
| 7         | 770.42        | 385.71          | 753.39         | 377.20           | <b>F</b> | <b>532.32</b> | 266.67          | 515.30         | 258.15           | <b>4</b>  |
| 8         | 883.50        | 442.26          | 866.48         | 433.74           | <b>L</b> | <b>385.26</b> | 193.13          | 368.23         | 184.62           | <b>3</b>  |
| 9         | 980.56        | 490.78          | 963.53         | 482.27           | <b>P</b> | <b>272.17</b> | 136.59          | <b>255.15</b>  | 128.08           | <b>2</b>  |
| <b>10</b> |               |                 |                |                  | <b>R</b> | <b>175.12</b> | 88.06           | <b>158.09</b>  | 79.55            | <b>1</b>  |

MS/MS Fragmentation of ID566 **GSIKLLDQR**

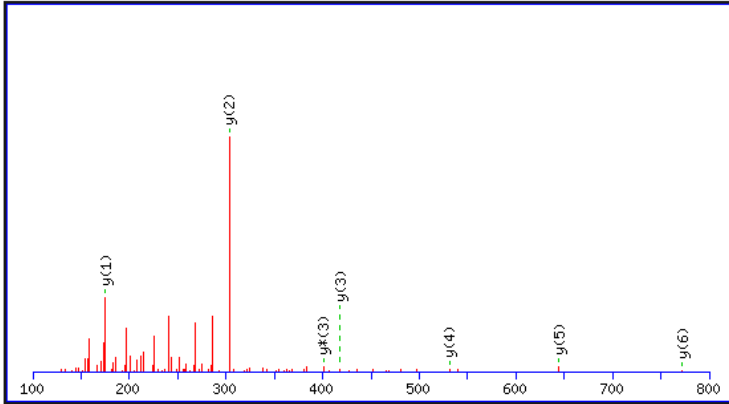

| #        | <b>b</b> | <b>b<sup>++</sup></b> | <b>b<sup>*</sup></b> | <b>b<sup>*++</sup></b> | <b>b<sup>0</sup></b> | <b>b<sup>0++</sup></b> | Seq.     | <b>y</b>      | <b>y<sup>++</sup></b> | <b>y<sup>*</sup></b> | <b>y<sup>*++</sup></b> | <b>y<sup>0</sup></b> | <b>y<sup>0++</sup></b> | #        |
|----------|----------|-----------------------|----------------------|------------------------|----------------------|------------------------|----------|---------------|-----------------------|----------------------|------------------------|----------------------|------------------------|----------|
| <b>1</b> | 58.03    | 29.52                 |                      |                        |                      |                        | <b>G</b> |               |                       |                      |                        |                      |                        | <b>9</b> |
| <b>2</b> | 145.06   | 73.03                 |                      |                        | 127.05               | 64.03                  | <b>S</b> | 972.58        | 486.80                | 955.56               | 478.28                 | 954.57               | 477.79                 | <b>8</b> |
| <b>3</b> | 258.14   | 129.58                |                      |                        | 240.13               | 120.57                 | <b>L</b> | 885.55        | 443.28                | 868.53               | 434.77                 | 867.54               | 434.27                 | <b>7</b> |
| <b>4</b> | 386.24   | 193.62                | 369.21               | 185.11                 | 368.23               | 184.62                 | <b>K</b> | <b>772.47</b> | 386.74                | 755.44               | 378.22                 | 754.46               | 377.73                 | <b>6</b> |
| <b>5</b> | 499.32   | 250.17                | 482.30               | 241.65                 | 481.31               | 241.16                 | <b>L</b> | <b>644.37</b> | 322.69                | 627.35               | 314.18                 | 626.36               | 313.68                 | <b>5</b> |
| <b>6</b> | 612.41   | 306.71                | 595.38               | 298.19                 | 594.40               | 297.70                 | <b>L</b> | <b>531.29</b> | 266.15                | 514.26               | 257.63                 | 513.28               | 257.14                 | <b>4</b> |
| <b>7</b> | 727.43   | 364.22                | 710.41               | 355.71                 | 709.42               | 355.22                 | <b>D</b> | <b>418.20</b> | 209.61                | <b>401.18</b>        | 201.09                 | 400.19               | 200.60                 | <b>3</b> |
| <b>8</b> | 855.49   | 428.25                | 838.47               | 419.74                 | 837.48               | 419.25                 | <b>Q</b> | <b>303.18</b> | 152.09                | 286.15               | 143.58                 |                      |                        | <b>2</b> |
| <b>9</b> |          |                       |                      |                        |                      |                        | <b>R</b> | <b>175.12</b> | 88.06                 | 158.09               | 79.55                  |                      |                        | <b>1</b> |

MS/MS Fragmentation of ID567 **EYAAFPASWLR**

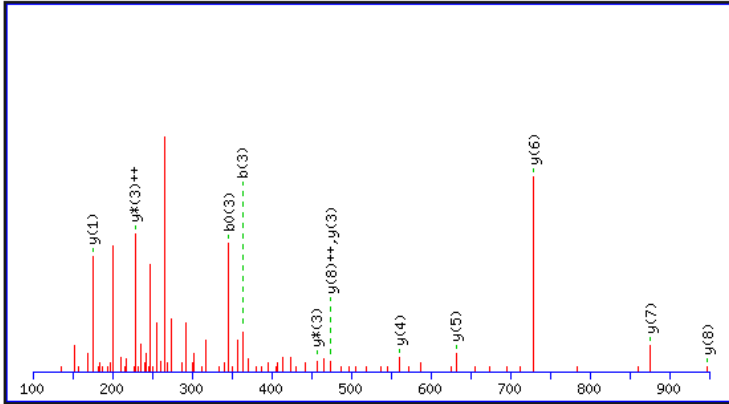

| #         | <b>b</b>      | <b>b<sup>++</sup></b> | <b>b<sup>0</sup></b> | <b>b<sup>0++</sup></b> | <b>Seq.</b> | <b>y</b>      | <b>y<sup>++</sup></b> | <b>y<sup>*</sup></b> | <b>y<sup>*++</sup></b> | <b>y<sup>0</sup></b> | <b>y<sup>0++</sup></b> | #         |
|-----------|---------------|-----------------------|----------------------|------------------------|-------------|---------------|-----------------------|----------------------|------------------------|----------------------|------------------------|-----------|
| <b>1</b>  | 130.05        | 65.53                 | 112.04               | 56.52                  | <b>E</b>    |               |                       |                      |                        |                      |                        | <b>11</b> |
| <b>2</b>  | 293.11        | 147.06                | 275.10               | 138.05                 | <b>Y</b>    | 1181.61       | 591.31                | 1164.58              | 582.80                 | 1163.60              | 582.30                 | <b>10</b> |
| <b>3</b>  | <b>364.15</b> | 182.58                | <b>346.14</b>        | 173.57                 | <b>A</b>    | 1018.55       | 509.78                | 1001.52              | 501.26                 | 1000.54              | 500.77                 | <b>9</b>  |
| <b>4</b>  | 435.19        | 218.10                | 417.18               | 209.09                 | <b>A</b>    | <b>947.51</b> | <b>474.26</b>         | 930.48               | 465.75                 | 929.50               | 465.25                 | <b>8</b>  |
| <b>5</b>  | 582.26        | 291.63                | 564.25               | 282.63                 | <b>F</b>    | <b>876.47</b> | 438.74                | 859.45               | 430.23                 | 858.46               | 429.73                 | <b>7</b>  |
| <b>6</b>  | 679.31        | 340.16                | 661.30               | 331.15                 | <b>P</b>    | <b>729.40</b> | 365.21                | 712.38               | 356.69                 | 711.39               | 356.20                 | <b>6</b>  |
| <b>7</b>  | 750.35        | 375.68                | 732.34               | 366.67                 | <b>A</b>    | <b>632.35</b> | 316.68                | 615.32               | 308.17                 | 614.34               | 307.67                 | <b>5</b>  |
| <b>8</b>  | 837.38        | 419.19                | 819.37               | 410.19                 | <b>S</b>    | <b>561.31</b> | 281.16                | 544.29               | 272.65                 | 543.30               | 272.16                 | <b>4</b>  |
| <b>9</b>  | 1023.46       | 512.23                | 1005.45              | 503.23                 | <b>W</b>    | <b>474.28</b> | 237.64                | <b>457.26</b>        | <b>229.13</b>          |                      |                        | <b>3</b>  |
| <b>10</b> | 1136.54       | 568.77                | 1118.53              | 559.77                 | <b>L</b>    | 288.20        | 144.61                | 271.18               | 136.09                 |                      |                        | <b>2</b>  |
| <b>11</b> |               |                       |                      |                        | <b>R</b>    | <b>175.12</b> | 88.06                 | 158.09               | 79.55                  |                      |                        | <b>1</b>  |



MS/MS Fragmentation of ID568 **LIENEYLGLK**

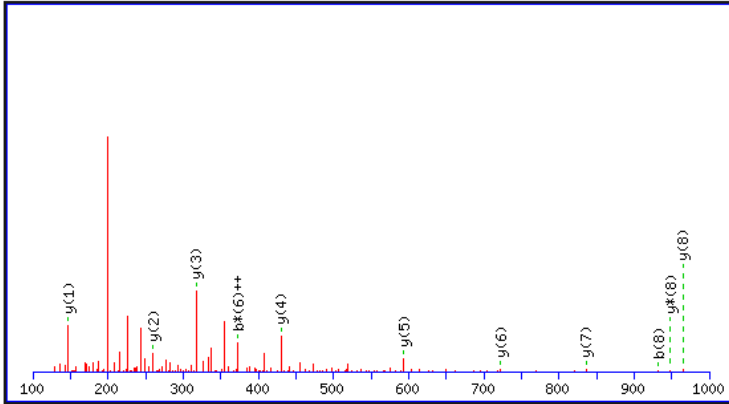

| #         | <b>b</b>      | <b>b<sup>++</sup></b> | <b>b*</b> | <b>b<sup>*++</sup></b> | <b>b<sup>0</sup></b> | <b>b<sup>0++</sup></b> | Seq.     | <b>y</b>      | <b>y<sup>++</sup></b> | <b>y*</b>     | <b>y<sup>*++</sup></b> | <b>y<sup>0</sup></b> | <b>y<sup>0++</sup></b> | #         |
|-----------|---------------|-----------------------|-----------|------------------------|----------------------|------------------------|----------|---------------|-----------------------|---------------|------------------------|----------------------|------------------------|-----------|
| <b>1</b>  | 114.09        | 57.55                 |           |                        |                      |                        | <b>L</b> |               |                       |               |                        |                      |                        | <b>10</b> |
| <b>2</b>  | 227.18        | 114.09                |           |                        |                      |                        | <b>I</b> | 1078.58       | 539.79                | 1061.55       | 531.28                 | 1060.57              | 530.79                 | <b>9</b>  |
| <b>3</b>  | 356.22        | 178.61                |           |                        | 338.21               | 169.61                 | <b>E</b> | <b>965.49</b> | 483.25                | <b>948.47</b> | 474.74                 | 947.48               | 474.25                 | <b>8</b>  |
| <b>4</b>  | 470.26        | 235.63                | 453.23    | 227.12                 | 452.25               | 226.63                 | <b>N</b> | <b>836.45</b> | 418.73                | 819.42        | 410.22                 | 818.44               | 409.72                 | <b>7</b>  |
| <b>5</b>  | 599.30        | 300.16                | 582.28    | 291.64                 | 581.29               | 291.15                 | <b>E</b> | <b>722.41</b> | 361.71                | 705.38        | 353.19                 | 704.40               | 352.70                 | <b>6</b>  |
| <b>6</b>  | 762.37        | 381.69                | 745.34    | <b>373.17</b>          | 744.36               | 372.68                 | <b>Y</b> | <b>593.37</b> | 297.19                | 576.34        | 288.67                 |                      |                        | <b>5</b>  |
| <b>7</b>  | 875.45        | 438.23                | 858.42    | 429.72                 | 857.44               | 429.22                 | <b>L</b> | <b>430.30</b> | 215.65                | 413.28        | 207.14                 |                      |                        | <b>4</b>  |
| <b>8</b>  | <b>932.47</b> | 466.74                | 915.45    | 458.23                 | 914.46               | 457.73                 | <b>G</b> | <b>317.22</b> | 159.11                | 300.19        | 150.60                 |                      |                        | <b>3</b>  |
| <b>9</b>  | 1045.56       | 523.28                | 1028.53   | 514.77                 | 1027.55              | 514.28                 | <b>L</b> | <b>260.20</b> | 130.60                | 243.17        | 122.09                 |                      |                        | <b>2</b>  |
| <b>10</b> |               |                       |           |                        |                      |                        | <b>K</b> | <b>147.11</b> | 74.06                 | 130.09        | 65.55                  |                      |                        | <b>1</b>  |

MS/MS Fragmentation of ID575 **GISMAVESVVTNLK**

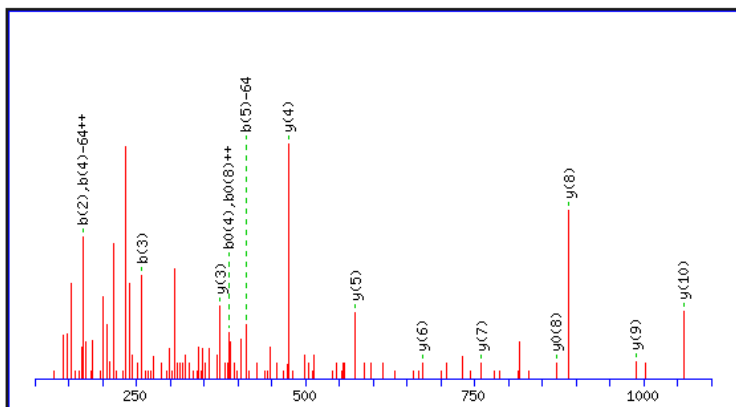

| #  | b             | b <sup>++</sup> | b <sup>*</sup> | b <sup>*++</sup> | b <sup>0</sup> | b <sup>0++</sup> | Seq.     | y              | y <sup>++</sup> | y <sup>*</sup> | y <sup>*++</sup> | y <sup>0</sup> | y <sup>0++</sup> | #  |
|----|---------------|-----------------|----------------|------------------|----------------|------------------|----------|----------------|-----------------|----------------|------------------|----------------|------------------|----|
| 1  | 58.03         | 29.52           |                |                  |                |                  | <b>G</b> |                |                 |                |                  |                |                  | 14 |
| 2  | <b>171.11</b> | 86.06           |                |                  |                |                  | <b>I</b> | 1342.76        | 671.88          | 1325.73        | 663.37           | 1324.75        | 662.88           | 13 |
| 3  | <b>258.14</b> | 129.58          |                |                  | 240.13         | 120.57           | <b>S</b> | 1229.67        | 615.34          | 1212.65        | 606.83           | 1211.66        | 606.34           | 12 |
| 4  | 341.18        | <b>171.09</b>   |                |                  | 323.17         | 162.09           | <b>M</b> | 1142.64        | 571.82          | 1125.62        | 563.31           | 1124.63        | 562.82           | 11 |
| 5  | <b>412.22</b> | 206.61          |                |                  | 394.21         | 197.61           | <b>A</b> | <b>1059.60</b> | 530.31          | 1042.58        | 521.79           | 1041.59        | 521.30           | 10 |
| 6  | 511.29        | 256.15          |                |                  | 493.28         | 247.14           | <b>V</b> | <b>988.57</b>  | 494.79          | 971.54         | 486.27           | 970.56         | 485.78           | 9  |
| 7  | 640.33        | 320.67          |                |                  | 622.32         | 311.66           | <b>E</b> | <b>889.50</b>  | 445.25          | 872.47         | 436.74           | <b>871.49</b>  | 436.25           | 8  |
| 8  | 727.36        | 364.18          |                |                  | 709.35         | 355.18           | <b>S</b> | <b>760.46</b>  | 380.73          | 743.43         | 372.22           | 742.45         | 371.73           | 7  |
| 9  | 826.43        | 413.72          |                |                  | 808.42         | 404.71           | <b>V</b> | <b>673.42</b>  | 337.22          | 656.40         | 328.70           | 655.41         | 328.21           | 6  |
| 10 | 925.50        | 463.25          |                |                  | 907.49         | 454.25           | <b>V</b> | <b>574.36</b>  | 287.68          | 557.33         | 279.17           | 556.35         | 278.68           | 5  |
| 11 | 1026.55       | 513.78          |                |                  | 1008.54        | 504.77           | <b>T</b> | <b>475.29</b>  | 238.15          | 458.26         | 229.63           | 457.28         | 229.14           | 4  |
| 12 | 1140.59       | 570.80          | 1123.56        | 562.29           | 1122.58        | 561.79           | <b>N</b> | <b>374.24</b>  | 187.62          | 357.21         | 179.11           |                |                  | 3  |
| 13 | 1253.67       | 627.34          | 1236.65        | 618.83           | 1235.66        | 618.34           | <b>L</b> | 260.20         | 130.60          | 243.17         | 122.09           |                |                  | 2  |
| 14 |               |                 |                |                  |                |                  | <b>K</b> | 147.11         | 74.06           | 130.09         | 65.55            |                |                  | 1  |

MS/MS Fragmentation of ID579 **IYEEFLAIIK**

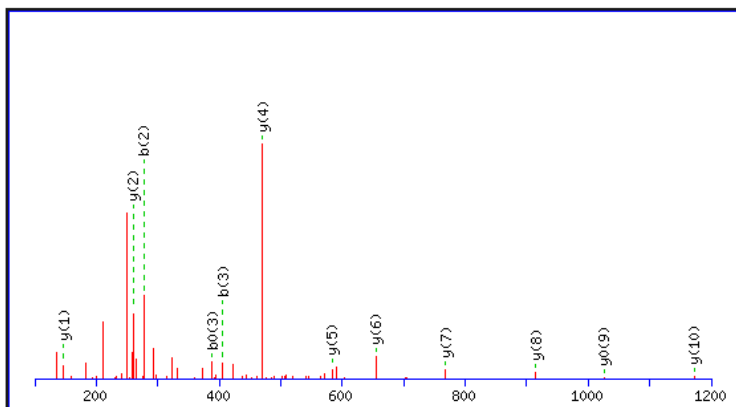

| #         | <b>b</b>      | <b>b<sup>++</sup></b> | <b>b<sup>0</sup></b> | <b>b<sup>0++</sup></b> | Seq.     | <b>y</b>       | <b>y<sup>++</sup></b> | <b>y<sup>*</sup></b> | <b>y<sup>*++</sup></b> | <b>y<sup>0</sup></b> | <b>y<sup>0++</sup></b> | #         |
|-----------|---------------|-----------------------|----------------------|------------------------|----------|----------------|-----------------------|----------------------|------------------------|----------------------|------------------------|-----------|
| <b>1</b>  | 114.09        | 57.55                 |                      |                        | <b>I</b> |                |                       |                      |                        |                      |                        | <b>12</b> |
| <b>2</b>  | <b>277.15</b> | 139.08                |                      |                        | <b>Y</b> | 1335.76        | 668.38                | 1318.73              | 659.87                 | 1317.75              | 659.38                 | <b>11</b> |
| <b>3</b>  | <b>406.20</b> | 203.60                | <b>388.19</b>        | 194.60                 | <b>E</b> | <b>1172.69</b> | 586.85                | 1155.67              | 578.34                 | 1154.68              | 577.84                 | <b>10</b> |
| <b>4</b>  | 535.24        | 268.12                | 517.23               | 259.12                 | <b>E</b> | 1043.65        | 522.33                | 1026.62              | 513.82                 | <b>1025.64</b>       | 513.32                 | <b>9</b>  |
| <b>5</b>  | 682.31        | 341.66                | 664.30               | 332.65                 | <b>F</b> | <b>914.61</b>  | 457.81                | 897.58               | 449.29                 |                      |                        | <b>8</b>  |
| <b>6</b>  | 795.39        | 398.20                | 777.38               | 389.19                 | <b>L</b> | <b>767.54</b>  | 384.27                | 750.51               | 375.76                 |                      |                        | <b>7</b>  |
| <b>7</b>  | 866.43        | 433.72                | 848.42               | 424.71                 | <b>A</b> | <b>654.45</b>  | 327.73                | 637.43               | 319.22                 |                      |                        | <b>6</b>  |
| <b>8</b>  | 979.51        | 490.26                | 961.50               | 481.26                 | <b>I</b> | <b>583.42</b>  | 292.21                | 566.39               | 283.70                 |                      |                        | <b>5</b>  |
| <b>9</b>  | 1076.57       | 538.79                | 1058.56              | 529.78                 | <b>P</b> | <b>470.33</b>  | 235.67                | 453.31               | 227.16                 |                      |                        | <b>4</b>  |
| <b>10</b> | 1189.65       | 595.33                | 1171.64              | 586.32                 | <b>I</b> | 373.28         | 187.14                | 356.25               | 178.63                 |                      |                        | <b>3</b>  |
| <b>11</b> | 1302.73       | 651.87                | 1284.72              | 642.87                 | <b>I</b> | <b>260.20</b>  | 130.60                | 243.17               | 122.09                 |                      |                        | <b>2</b>  |
| <b>12</b> |               |                       |                      |                        | <b>K</b> | <b>147.11</b>  | 74.06                 | 130.09               | 65.55                  |                      |                        | <b>1</b>  |

MS/MS Fragmentation of ID580 **VFEIGPVFR**

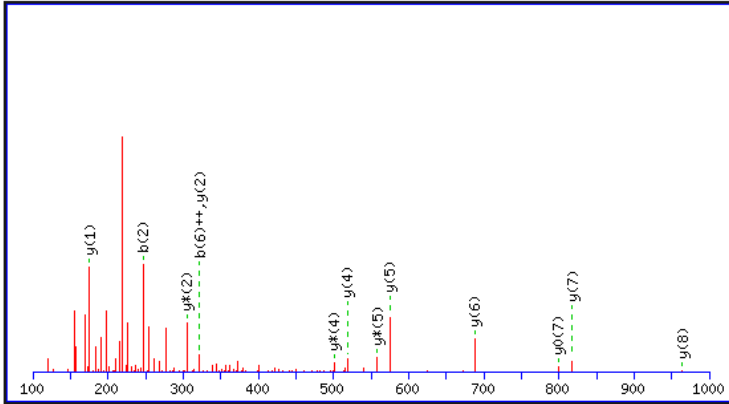

| # | <b>b</b>      | <b>b<sup>++</sup></b> | <b>b<sup>0</sup></b> | <b>b<sup>0++</sup></b> | <b>Seq.</b> | <b>y</b>      | <b>y<sup>++</sup></b> | <b>y<sup>*</sup></b> | <b>y<sup>+++</sup></b> | <b>y<sup>0</sup></b> | <b>y<sup>0++</sup></b> | # |
|---|---------------|-----------------------|----------------------|------------------------|-------------|---------------|-----------------------|----------------------|------------------------|----------------------|------------------------|---|
| 1 | 100.08        | 50.54                 |                      |                        | <b>V</b>    |               |                       |                      |                        |                      |                        | 9 |
| 2 | <b>247.14</b> | 124.08                |                      |                        | <b>F</b>    | <b>964.53</b> | 482.77                | 947.50               | 474.25                 | 946.51               | 473.76                 | 8 |
| 3 | 376.19        | 188.60                | 358.18               | 179.59                 | <b>E</b>    | <b>817.46</b> | 409.23                | 800.43               | 400.72                 | <b>799.45</b>        | 400.23                 | 7 |
| 4 | 489.27        | 245.14                | 471.26               | 236.13                 | <b>I</b>    | <b>688.41</b> | 344.71                | 671.39               | 336.20                 |                      |                        | 6 |
| 5 | 546.29        | 273.65                | 528.28               | 264.64                 | <b>G</b>    | <b>575.33</b> | 288.17                | <b>558.30</b>        | 279.66                 |                      |                        | 5 |
| 6 | 643.34        | <b>322.18</b>         | 625.33               | 313.17                 | <b>P</b>    | <b>518.31</b> | 259.66                | <b>501.28</b>        | 251.14                 |                      |                        | 4 |
| 7 | 742.41        | 371.71                | 724.40               | 362.71                 | <b>V</b>    | 421.26        | 211.13                | 404.23               | 202.62                 |                      |                        | 3 |
| 8 | 889.48        | 445.24                | 871.47               | 436.24                 | <b>F</b>    | <b>322.19</b> | 161.60                | <b>305.16</b>        | 153.08                 |                      |                        | 2 |
| 9 |               |                       |                      |                        | <b>R</b>    | <b>175.12</b> | 88.06                 | 158.09               | 79.55                  |                      |                        | 1 |

MS/MS Fragmentation of ID584 **IINEPTAAAIAYGLDK**

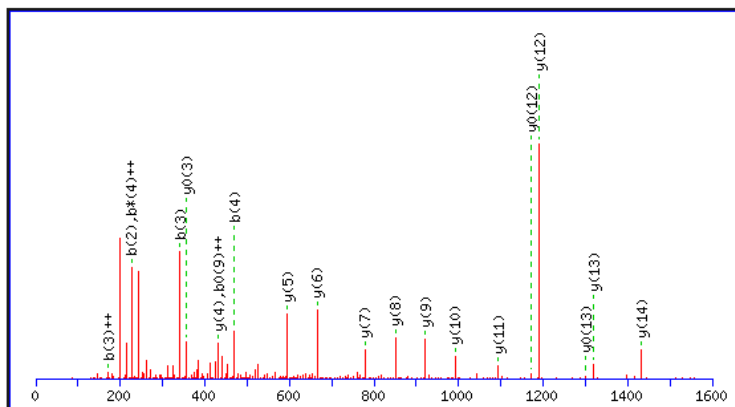

| #  | b             | b <sup>++</sup> | b <sup>*</sup> | b <sup>*++</sup> | b <sup>0</sup> | b <sup>0++</sup> | Seq. | y              | y <sup>++</sup> | y <sup>*</sup> | y <sup>*++</sup> | y <sup>0</sup> | y <sup>0++</sup> | #  |
|----|---------------|-----------------|----------------|------------------|----------------|------------------|------|----------------|-----------------|----------------|------------------|----------------|------------------|----|
| 1  | 114.09        | 57.55           |                |                  |                |                  | I    |                |                 |                |                  |                |                  | 16 |
| 2  | <b>227.18</b> | 114.09          |                |                  |                |                  | I    | 1546.81        | 773.91          | 1529.78        | 765.40           | 1528.80        | 764.90           | 15 |
| 3  | <b>341.22</b> | <b>171.11</b>   | 324.19         | 162.60           |                |                  | N    | <b>1433.73</b> | 717.37          | 1416.70        | 708.85           | 1415.72        | 708.36           | 14 |
| 4  | <b>470.26</b> | 235.63          | 453.23         | <b>227.12</b>    | 452.25         | 226.63           | E    | <b>1319.68</b> | 660.35          | 1302.66        | 651.83           | <b>1301.67</b> | 651.34           | 13 |
| 5  | 567.31        | 284.16          | 550.29         | 275.65           | 549.30         | 275.16           | P    | <b>1190.64</b> | 595.82          | 1173.61        | 587.31           | <b>1172.63</b> | 586.82           | 12 |
| 6  | 668.36        | 334.68          | 651.33         | 326.17           | 650.35         | 325.68           | T    | <b>1093.59</b> | 547.30          | 1076.56        | 538.78           | 1075.58        | 538.29           | 11 |
| 7  | 739.40        | 370.20          | 722.37         | 361.69           | 721.39         | 361.20           | A    | <b>992.54</b>  | 496.77          | 975.51         | 488.26           | 974.53         | 487.77           | 10 |
| 8  | 810.44        | 405.72          | 793.41         | 397.21           | 792.43         | 396.72           | A    | <b>921.50</b>  | 461.26          | 904.48         | 452.74           | 903.49         | 452.25           | 9  |
| 9  | 881.47        | 441.24          | 864.45         | 432.73           | 863.46         | <b>432.23</b>    | A    | <b>850.47</b>  | 425.74          | 833.44         | 417.22           | 832.46         | 416.73           | 8  |
| 10 | 994.56        | 497.78          | 977.53         | 489.27           | 976.55         | 488.78           | I    | <b>779.43</b>  | 390.22          | 762.40         | 381.71           | 761.42         | 381.21           | 7  |
| 11 | 1065.59       | 533.30          | 1048.57        | 524.79           | 1047.58        | 524.30           | A    | <b>666.35</b>  | 333.68          | 649.32         | 325.16           | 648.34         | 324.67           | 6  |
| 12 | 1228.66       | 614.83          | 1211.63        | 606.32           | 1210.65        | 605.83           | Y    | <b>595.31</b>  | 298.16          | 578.28         | 289.64           | 577.30         | 289.15           | 5  |
| 13 | 1285.68       | 643.34          | 1268.65        | 634.83           | 1267.67        | 634.34           | G    | <b>432.25</b>  | 216.63          | 415.22         | 208.11           | 414.23         | 207.62           | 4  |
| 14 | 1398.76       | 699.88          | 1381.74        | 691.37           | 1380.75        | 690.88           | L    | 375.22         | 188.12          | 358.20         | 179.60           | <b>357.21</b>  | 179.11           | 3  |
| 15 | 1513.79       | 757.40          | 1496.76        | 748.89           | 1495.78        | 748.39           | D    | 262.14         | 131.57          | 245.11         | 123.06           | 244.13         | 122.57           | 2  |
| 16 |               |                 |                |                  |                |                  | K    | 147.11         | 74.06           | 130.09         | 65.55            |                |                  | 1  |

MS/MS Fragmentation of ID588 **GILLFGPPGTGK**



| #         | <b>b</b>      | <b>b<sup>++</sup></b> | <b>b<sup>0</sup></b> | <b>b<sup>0++</sup></b> | Seq.     | <b>y</b>      | <b>y<sup>++</sup></b> | <b>y<sup>*</sup></b> | <b>y<sup>*++</sup></b> | <b>y<sup>0</sup></b> | <b>y<sup>0++</sup></b> | #         |
|-----------|---------------|-----------------------|----------------------|------------------------|----------|---------------|-----------------------|----------------------|------------------------|----------------------|------------------------|-----------|
| <b>1</b>  | 58.03         | 29.52                 |                      |                        | <b>G</b> |               |                       |                      |                        |                      |                        | <b>12</b> |
| <b>2</b>  | <b>171.11</b> | 86.06                 |                      |                        | <b>I</b> | 1099.65       | 550.33                | 1082.62              | 541.82                 | 1081.64              | 541.32                 | <b>11</b> |
| <b>3</b>  | <b>284.20</b> | 142.60                |                      |                        | <b>L</b> | 986.57        | 493.79                | 969.54               | 485.27                 | 968.56               | 484.78                 | <b>10</b> |
| <b>4</b>  | 397.28        | <b>199.14</b>         |                      |                        | <b>L</b> | <b>873.48</b> | 437.25                | 856.46               | 428.73                 | 855.47               | <b>428.24</b>          | <b>9</b>  |
| <b>5</b>  | 544.35        | 272.68                |                      |                        | <b>F</b> | <b>760.40</b> | 380.70                | 743.37               | 372.19                 | 742.39               | 371.70                 | <b>8</b>  |
| <b>6</b>  | 601.37        | 301.19                |                      |                        | <b>G</b> | <b>613.33</b> | 307.17                | 596.30               | 298.66                 | 595.32               | 298.16                 | <b>7</b>  |
| <b>7</b>  | 698.42        | 349.72                |                      |                        | <b>P</b> | <b>556.31</b> | 278.66                | 539.28               | 270.14                 | 538.30               | 269.65                 | <b>6</b>  |
| <b>8</b>  | 795.48        | 398.24                |                      |                        | <b>P</b> | <b>459.26</b> | 230.13                | 442.23               | 221.62                 | 441.25               | 221.13                 | <b>5</b>  |
| <b>9</b>  | 852.50        | 426.75                |                      |                        | <b>G</b> | <b>362.20</b> | 181.61                | 345.18               | 173.09                 | 344.19               | 172.60                 | <b>4</b>  |
| <b>10</b> | 953.55        | 477.28                | 935.53               | 468.27                 | <b>T</b> | 305.18        | 153.09                | 288.16               | 144.58                 | 287.17               | 144.09                 | <b>3</b>  |
| <b>11</b> | 1010.57       | 505.79                | 992.56               | 496.78                 | <b>G</b> | 204.13        | 102.57                | 187.11               | 94.06                  |                      |                        | <b>2</b>  |
| <b>12</b> |               |                       |                      |                        | <b>K</b> | 147.11        | 74.06                 | 130.09               | 65.55                  |                      |                        | <b>1</b>  |

MS/MS Fragmentation of ID592 **TGNLVDNLLTGALK**

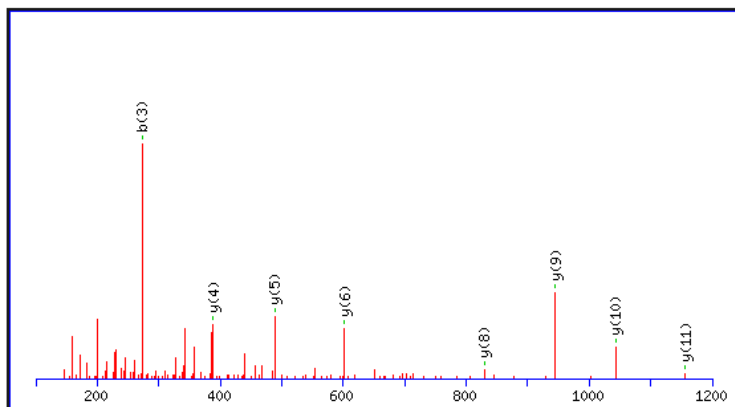

| #         | <b>b</b>      | <b>b<sup>++</sup></b> | <b>b<sup>*</sup></b> | <b>b<sup>*++</sup></b> | <b>b<sup>0</sup></b> | <b>b<sup>0++</sup></b> | Seq.     | <b>y</b>       | <b>y<sup>++</sup></b> | <b>y<sup>*</sup></b> | <b>y<sup>*++</sup></b> | <b>y<sup>0</sup></b> | <b>y<sup>0++</sup></b> | #         |
|-----------|---------------|-----------------------|----------------------|------------------------|----------------------|------------------------|----------|----------------|-----------------------|----------------------|------------------------|----------------------|------------------------|-----------|
| <b>1</b>  | 102.05        | 51.53                 |                      |                        | 84.04                | 42.53                  | <b>T</b> |                |                       |                      |                        |                      |                        | <b>14</b> |
| <b>2</b>  | 159.08        | 80.04                 |                      |                        | 141.07               | 71.04                  | <b>G</b> | 1327.76        | 664.38                | 1310.73              | 655.87                 | 1309.75              | 655.38                 | <b>13</b> |
| <b>3</b>  | <b>273.12</b> | 137.06                | 256.09               | 128.55                 | 255.11               | 128.06                 | <b>N</b> | 1270.74        | 635.87                | 1253.71              | 627.36                 | 1252.73              | 626.87                 | <b>12</b> |
| <b>4</b>  | 386.20        | 193.61                | 369.18               | 185.09                 | 368.19               | 184.60                 | <b>L</b> | <b>1156.69</b> | 578.85                | 1139.67              | 570.34                 | 1138.68              | 569.85                 | <b>11</b> |
| <b>5</b>  | 485.27        | 243.14                | 468.25               | 234.63                 | 467.26               | 234.13                 | <b>V</b> | <b>1043.61</b> | 522.31                | 1026.58              | 513.80                 | 1025.60              | 513.30                 | <b>10</b> |
| <b>6</b>  | 600.30        | 300.65                | 583.27               | 292.14                 | 582.29               | 291.65                 | <b>D</b> | <b>944.54</b>  | 472.77                | 927.51               | 464.26                 | 926.53               | 463.77                 | <b>9</b>  |
| <b>7</b>  | 714.34        | 357.67                | 697.32               | 349.16                 | 696.33               | 348.67                 | <b>N</b> | <b>829.51</b>  | 415.26                | 812.49               | 406.75                 | 811.50               | 406.26                 | <b>8</b>  |
| <b>8</b>  | 827.43        | 414.22                | 810.40               | 405.70                 | 809.42               | 405.21                 | <b>L</b> | 715.47         | 358.24                | 698.44               | 349.73                 | 697.46               | 349.23                 | <b>7</b>  |
| <b>9</b>  | 940.51        | 470.76                | 923.48               | 462.25                 | 922.50               | 461.75                 | <b>L</b> | <b>602.39</b>  | 301.70                | 585.36               | 293.18                 | 584.38               | 292.69                 | <b>6</b>  |
| <b>10</b> | 1041.56       | 521.28                | 1024.53              | 512.77                 | 1023.55              | 512.28                 | <b>T</b> | <b>489.30</b>  | 245.16                | 472.28               | 236.64                 | 471.29               | 236.15                 | <b>5</b>  |
| <b>11</b> | 1098.58       | 549.79                | 1081.55              | 541.28                 | 1080.57              | 540.79                 | <b>G</b> | <b>388.26</b>  | 194.63                | 371.23               | 186.12                 |                      |                        | <b>4</b>  |
| <b>12</b> | 1169.62       | 585.31                | 1152.59              | 576.80                 | 1151.61              | 576.31                 | <b>A</b> | 331.23         | 166.12                | 314.21               | 157.61                 |                      |                        | <b>3</b>  |
| <b>13</b> | 1282.70       | 641.85                | 1265.67              | 633.34                 | 1264.69              | 632.85                 | <b>L</b> | 260.20         | 130.60                | 243.17               | 122.09                 |                      |                        | <b>2</b>  |
| <b>14</b> |               |                       |                      |                        |                      |                        | <b>K</b> | 147.11         | 74.06                 | 130.09               | 65.55                  |                      |                        | <b>1</b>  |

MS/MS Fragmentation of ID593 **VVGTQAPVQLGSLR**

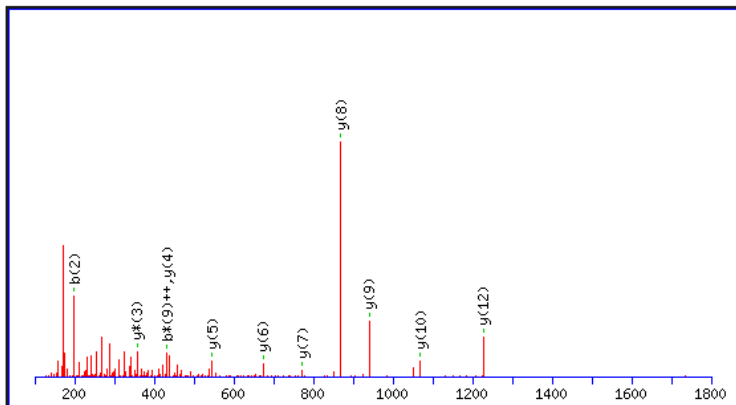

| #  | b             | b <sup>++</sup> | b*      | b <sup>*++</sup> | b <sup>0</sup> | b <sup>0++</sup> | Seq. | y              | y <sup>++</sup> | y*            | y <sup>*++</sup> | y <sup>0</sup> | y <sup>0++</sup> | #  |
|----|---------------|-----------------|---------|------------------|----------------|------------------|------|----------------|-----------------|---------------|------------------|----------------|------------------|----|
| 1  | 100.08        | 50.54           |         |                  |                |                  | V    |                |                 |               |                  |                |                  | 14 |
| 2  | <b>199.14</b> | 100.08          |         |                  |                |                  | V    | 1325.75        | 663.38          | 1308.73       | 654.87           | 1307.74        | 654.38           | 13 |
| 3  | 256.17        | 128.59          |         |                  |                |                  | G    | <b>1226.69</b> | 613.85          | 1209.66       | 605.33           | 1208.67        | 604.84           | 12 |
| 4  | 357.21        | 179.11          |         |                  | 339.20         | 170.10           | T    | 1169.66        | 585.34          | 1152.64       | 576.82           | 1151.65        | 576.33           | 11 |
| 5  | 485.27        | 243.14          | 468.25  | 234.63           | 467.26         | 234.13           | Q    | <b>1068.62</b> | 534.81          | 1051.59       | 526.30           | 1050.61        | 525.81           | 10 |
| 6  | 556.31        | 278.66          | 539.28  | 270.14           | 538.30         | 269.65           | A    | <b>940.56</b>  | 470.78          | 923.53        | 462.27           | 922.55         | 461.78           | 9  |
| 7  | 653.36        | 327.18          | 636.34  | 318.67           | 635.35         | 318.18           | P    | <b>869.52</b>  | 435.26          | 852.49        | 426.75           | 851.51         | 426.26           | 8  |
| 8  | 752.43        | 376.72          | 735.40  | 368.21           | 734.42         | 367.71           | V    | <b>772.47</b>  | 386.74          | 755.44        | 378.22           | 754.46         | 377.73           | 7  |
| 9  | 880.49        | 440.75          | 863.46  | <b>432.23</b>    | 862.48         | 431.74           | Q    | <b>673.40</b>  | 337.20          | 656.37        | 328.69           | 655.39         | 328.20           | 6  |
| 10 | 993.57        | 497.29          | 976.55  | 488.78           | 975.56         | 488.28           | L    | <b>545.34</b>  | 273.17          | 528.31        | 264.66           | 527.33         | 264.17           | 5  |
| 11 | 1050.59       | 525.80          | 1033.57 | 517.29           | 1032.58        | 516.80           | G    | <b>432.26</b>  | 216.63          | 415.23        | 208.12           | 414.25         | 207.63           | 4  |
| 12 | 1137.63       | 569.32          | 1120.60 | 560.80           | 1119.62        | 560.31           | S    | 375.24         | 188.12          | <b>358.21</b> | 179.61           | 357.22         | 179.12           | 3  |
| 13 | 1250.71       | 625.86          | 1233.68 | 617.35           | 1232.70        | 616.85           | L    | 288.20         | 144.61          | 271.18        | 136.09           |                |                  | 2  |
| 14 |               |                 |         |                  |                |                  | R    | 175.12         | 88.06           | 158.09        | 79.55            |                |                  | 1  |



MS/MS Fragmentation of ID609 **LLGSALFGVGEYK**

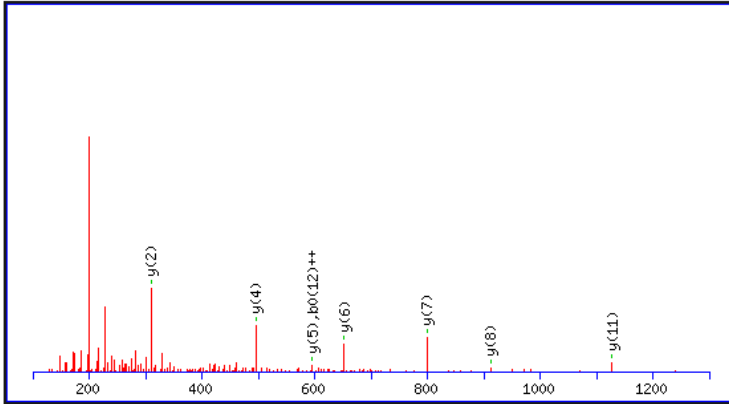

| #         | <b>b</b> | <b>b<sup>++</sup></b> | <b>b<sup>0</sup></b> | <b>b<sup>0++</sup></b> | Seq.     | <b>y</b>       | <b>y<sup>++</sup></b> | <b>y<sup>*</sup></b> | <b>y<sup>*++</sup></b> | <b>y<sup>0</sup></b> | <b>y<sup>0++</sup></b> | #         |
|-----------|----------|-----------------------|----------------------|------------------------|----------|----------------|-----------------------|----------------------|------------------------|----------------------|------------------------|-----------|
| <b>1</b>  | 114.09   | 57.55                 |                      |                        | <b>L</b> |                |                       |                      |                        |                      |                        | <b>13</b> |
| <b>2</b>  | 227.18   | 114.09                |                      |                        | <b>L</b> | 1240.66        | 620.83                | 1223.63              | 612.32                 | 1222.65              | 611.83                 | <b>12</b> |
| <b>3</b>  | 284.20   | 142.60                |                      |                        | <b>G</b> | <b>1127.57</b> | 564.29                | 1110.55              | 555.78                 | 1109.56              | 555.28                 | <b>11</b> |
| <b>4</b>  | 371.23   | 186.12                | 353.22               | 177.11                 | <b>S</b> | 1070.55        | 535.78                | 1053.53              | 527.27                 | 1052.54              | 526.77                 | <b>10</b> |
| <b>5</b>  | 442.27   | 221.64                | 424.26               | 212.63                 | <b>A</b> | 983.52         | 492.26                | 966.49               | 483.75                 | 965.51               | 483.26                 | <b>9</b>  |
| <b>6</b>  | 555.35   | 278.18                | 537.34               | 269.17                 | <b>L</b> | <b>912.48</b>  | 456.74                | 895.46               | 448.23                 | 894.47               | 447.74                 | <b>8</b>  |
| <b>7</b>  | 702.42   | 351.71                | 684.41               | 342.71                 | <b>F</b> | <b>799.40</b>  | 400.20                | 782.37               | 391.69                 | 781.39               | 391.20                 | <b>7</b>  |
| <b>8</b>  | 759.44   | 380.22                | 741.43               | 371.22                 | <b>G</b> | <b>652.33</b>  | 326.67                | 635.30               | 318.16                 | 634.32               | 317.66                 | <b>6</b>  |
| <b>9</b>  | 858.51   | 429.76                | 840.50               | 420.75                 | <b>V</b> | <b>595.31</b>  | 298.16                | 578.28               | 289.64                 | 577.30               | 289.15                 | <b>5</b>  |
| <b>10</b> | 915.53   | 458.27                | 897.52               | 449.26                 | <b>G</b> | <b>496.24</b>  | 248.62                | 479.21               | 240.11                 | 478.23               | 239.62                 | <b>4</b>  |
| <b>11</b> | 1044.57  | 522.79                | 1026.56              | 513.78                 | <b>E</b> | 439.22         | 220.11                | 422.19               | 211.60                 | 421.21               | 211.11                 | <b>3</b>  |
| <b>12</b> | 1207.64  | 604.32                | 1189.63              | <b>595.32</b>          | <b>Y</b> | <b>310.18</b>  | 155.59                | 293.15               | 147.08                 |                      |                        | <b>2</b>  |
| <b>13</b> |          |                       |                      |                        | <b>K</b> | 147.11         | 74.06                 | 130.09               | 65.55                  |                      |                        | <b>1</b>  |

MS/MS Fragmentation of ID610 **ISASELGEVLK**

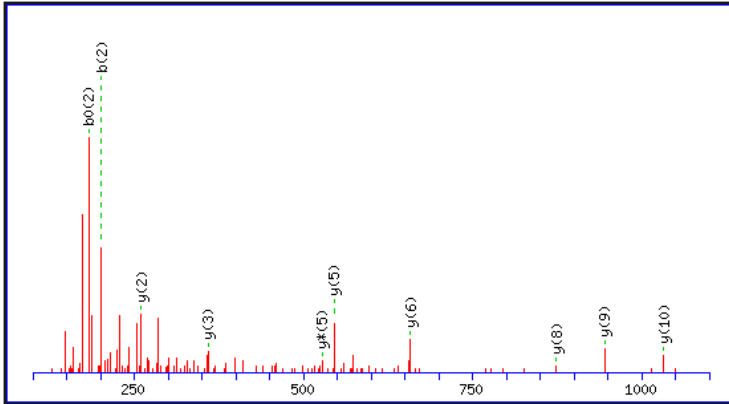

| #         | <b>b</b>      | <b>b<sup>++</sup></b> | <b>b<sup>0</sup></b> | <b>b<sup>0++</sup></b> | Seq.     | <b>y</b>       | <b>y<sup>++</sup></b> | <b>y<sup>*</sup></b> | <b>y<sup>*++</sup></b> | <b>y<sup>0</sup></b> | <b>y<sup>0++</sup></b> | #         |
|-----------|---------------|-----------------------|----------------------|------------------------|----------|----------------|-----------------------|----------------------|------------------------|----------------------|------------------------|-----------|
| <b>1</b>  | 114.09        | 57.55                 |                      |                        | <b>I</b> |                |                       |                      |                        |                      |                        | <b>11</b> |
| <b>2</b>  | <b>201.12</b> | 101.07                | <b>183.11</b>        | 92.06                  | <b>S</b> | <b>1032.56</b> | 516.78                | 1015.53              | 508.27                 | 1014.55              | 507.78                 | <b>10</b> |
| <b>3</b>  | 272.16        | 136.58                | 254.15               | 127.58                 | <b>A</b> | <b>945.53</b>  | 473.27                | 928.50               | 464.75                 | 927.51               | 464.26                 | <b>9</b>  |
| <b>4</b>  | 359.19        | 180.10                | 341.18               | 171.09                 | <b>S</b> | <b>874.49</b>  | 437.75                | 857.46               | 429.23                 | 856.48               | 428.74                 | <b>8</b>  |
| <b>5</b>  | 488.24        | 244.62                | 470.22               | 235.62                 | <b>E</b> | 787.46         | 394.23                | 770.43               | 385.72                 | 769.45               | 385.23                 | <b>7</b>  |
| <b>6</b>  | 601.32        | 301.16                | 583.31               | 292.16                 | <b>L</b> | <b>658.41</b>  | 329.71                | 641.39               | 321.20                 | 640.40               | 320.71                 | <b>6</b>  |
| <b>7</b>  | 658.34        | 329.67                | 640.33               | 320.67                 | <b>G</b> | <b>545.33</b>  | 273.17                | <b>528.30</b>        | 264.66                 | 527.32               | 264.16                 | <b>5</b>  |
| <b>8</b>  | 787.38        | 394.20                | 769.37               | 385.19                 | <b>E</b> | 488.31         | 244.66                | 471.28               | 236.14                 | 470.30               | 235.65                 | <b>4</b>  |
| <b>9</b>  | 886.45        | 443.73                | 868.44               | 434.72                 | <b>V</b> | <b>359.27</b>  | 180.14                | 342.24               | 171.62                 |                      |                        | <b>3</b>  |
| <b>10</b> | 999.54        | 500.27                | 981.53               | 491.27                 | <b>L</b> | <b>260.20</b>  | 130.60                | 243.17               | 122.09                 |                      |                        | <b>2</b>  |
| <b>11</b> |               |                       |                      |                        | <b>K</b> | 147.11         | 74.06                 | 130.09               | 65.55                  |                      |                        | <b>1</b>  |

MS/MS Fragmentation of ID611 **LTIEEATFR**

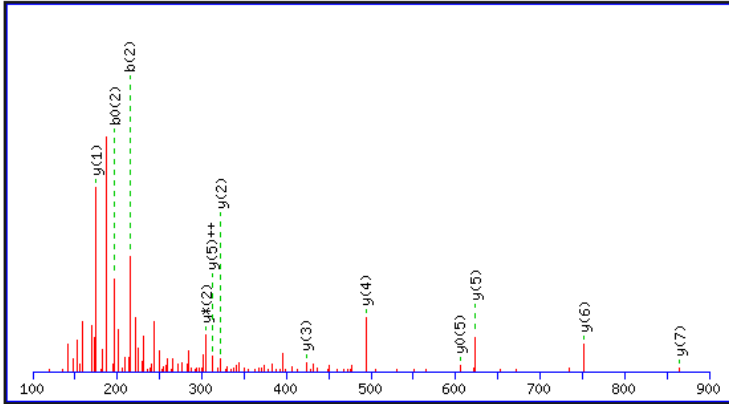

| # | b             | b <sup>++</sup> | b <sup>0</sup> | b <sup>0++</sup> | Seq. | y             | y <sup>++</sup> | y*            | y <sup>+++</sup> | y <sup>0</sup> | y <sup>0++</sup> | # |
|---|---------------|-----------------|----------------|------------------|------|---------------|-----------------|---------------|------------------|----------------|------------------|---|
| 1 | 114.09        | 57.55           |                |                  | L    |               |                 |               |                  |                |                  | 9 |
| 2 | <b>215.14</b> | 108.07          | <b>197.13</b>  | 99.07            | T    | 966.49        | 483.75          | 949.46        | 475.23           | 948.48         | 474.74           | 8 |
| 3 | 328.22        | 164.62          | 310.21         | 155.61           | I    | <b>865.44</b> | 433.22          | 848.41        | 424.71           | 847.43         | 424.22           | 7 |
| 4 | 457.27        | 229.14          | 439.26         | 220.13           | E    | <b>752.36</b> | 376.68          | 735.33        | 368.17           | 734.35         | 367.68           | 6 |
| 5 | 586.31        | 293.66          | 568.30         | 284.65           | E    | <b>623.31</b> | <b>312.16</b>   | 606.29        | 303.65           | <b>605.30</b>  | 303.16           | 5 |
| 6 | 657.35        | 329.18          | 639.33         | 320.17           | A    | <b>494.27</b> | 247.64          | 477.25        | 239.13           | 476.26         | 238.63           | 4 |
| 7 | 758.39        | 379.70          | 740.38         | 370.69           | T    | <b>423.24</b> | 212.12          | 406.21        | 203.61           | 405.22         | 203.12           | 3 |
| 8 | 905.46        | 453.23          | 887.45         | 444.23           | F    | <b>322.19</b> | 161.60          | <b>305.16</b> | 153.08           |                |                  | 2 |
| 9 |               |                 |                |                  | R    | <b>175.12</b> | 88.06           | 158.09        | 79.55            |                |                  | 1 |

MS/MS Fragmentation of ID615 **AGLIPPETALPWFR**

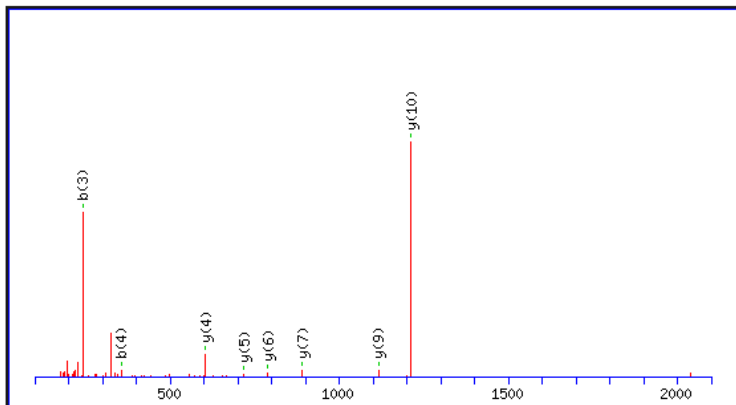

| #         | b             | b <sup>++</sup> | b <sup>0</sup> | b <sup>0++</sup> | Seq.     | y              | y <sup>++</sup> | y*      | y <sup>*++</sup> | y <sup>0</sup> | y <sup>0++</sup> | #         |
|-----------|---------------|-----------------|----------------|------------------|----------|----------------|-----------------|---------|------------------|----------------|------------------|-----------|
| <b>1</b>  | 72.04         | 36.53           |                |                  | <b>A</b> |                |                 |         |                  |                |                  | <b>14</b> |
| <b>2</b>  | 129.07        | 65.04           |                |                  | <b>G</b> | 1496.83        | 748.92          | 1479.80 | 740.40           | 1478.82        | 739.91           | <b>13</b> |
| <b>3</b>  | <b>242.15</b> | 121.58          |                |                  | <b>L</b> | 1439.80        | 720.41          | 1422.78 | 711.89           | 1421.79        | 711.40           | <b>12</b> |
| <b>4</b>  | <b>355.23</b> | 178.12          |                |                  | <b>I</b> | 1326.72        | 663.86          | 1309.69 | 655.35           | 1308.71        | 654.86           | <b>11</b> |
| <b>5</b>  | 452.29        | 226.65          |                |                  | <b>P</b> | <b>1213.64</b> | 607.32          | 1196.61 | 598.81           | 1195.63        | 598.32           | <b>10</b> |
| <b>6</b>  | 549.34        | 275.17          |                |                  | <b>P</b> | <b>1116.58</b> | 558.80          | 1099.56 | 550.28           | 1098.57        | 549.79           | <b>9</b>  |
| <b>7</b>  | 678.38        | 339.69          | 660.37         | 330.69           | <b>E</b> | 1019.53        | 510.27          | 1002.50 | 501.76           | 1001.52        | 501.26           | <b>8</b>  |
| <b>8</b>  | 779.43        | 390.22          | 761.42         | 381.21           | <b>T</b> | <b>890.49</b>  | 445.75          | 873.46  | 437.23           | 872.48         | 436.74           | <b>7</b>  |
| <b>9</b>  | 850.47        | 425.74          | 832.46         | 416.73           | <b>A</b> | <b>789.44</b>  | 395.22          | 772.41  | 386.71           |                |                  | <b>6</b>  |
| <b>10</b> | 963.55        | 482.28          | 945.54         | 473.27           | <b>L</b> | <b>718.40</b>  | 359.71          | 701.38  | 351.19           |                |                  | <b>5</b>  |
| <b>11</b> | 1060.60       | 530.81          | 1042.59        | 521.80           | <b>P</b> | <b>605.32</b>  | 303.16          | 588.29  | 294.65           |                |                  | <b>4</b>  |
| <b>12</b> | 1246.68       | 623.85          | 1228.67        | 614.84           | <b>W</b> | 508.27         | 254.64          | 491.24  | 246.12           |                |                  | <b>3</b>  |
| <b>13</b> | 1393.75       | 697.38          | 1375.74        | 688.37           | <b>F</b> | 322.19         | 161.60          | 305.16  | 153.08           |                |                  | <b>2</b>  |
| <b>14</b> |               |                 |                |                  | <b>R</b> | 175.12         | 88.06           | 158.09  | 79.55            |                |                  | <b>1</b>  |

MS/MS Fragmentation of ID621 **SALLQMNVPNK**

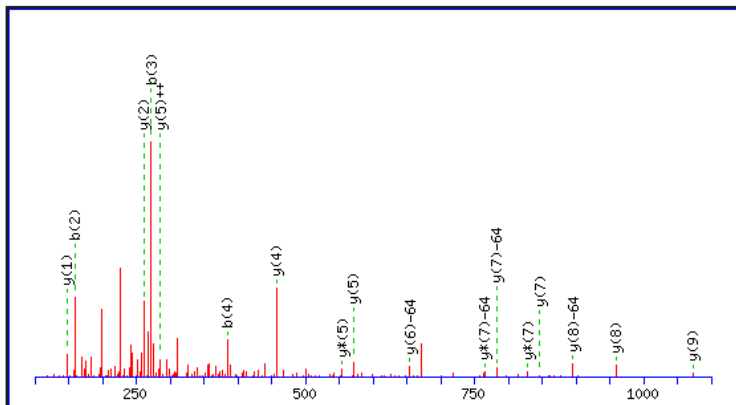

| #  | <b>b</b>      | <b>b<sup>++</sup></b> | <b>b*</b> | <b>b<sup>*++</sup></b> | <b>b<sup>0</sup></b> | <b>b<sup>0++</sup></b> | Seq.     | <b>y</b>      | <b>y<sup>++</sup></b> | <b>y*</b>     | <b>y<sup>*++</sup></b> | #         |
|----|---------------|-----------------------|-----------|------------------------|----------------------|------------------------|----------|---------------|-----------------------|---------------|------------------------|-----------|
| 1  | 88.04         | 44.52                 |           |                        | 70.03                | 35.52                  | <b>S</b> |               |                       |               |                        | <b>12</b> |
| 2  | <b>159.08</b> | 80.04                 |           |                        | 141.07               | 71.04                  | <b>A</b> | 1192.70       | 596.86                | 1175.68       | 588.34                 | <b>11</b> |
| 3  | <b>272.16</b> | 136.58                |           |                        | 254.15               | 127.58                 | <b>L</b> | 1121.67       | 561.34                | 1104.64       | 552.82                 | <b>10</b> |
| 4  | <b>385.24</b> | 193.13                |           |                        | 367.23               | 184.12                 | <b>L</b> | 1008.58       | 504.80                | 991.56        | 496.28                 | <b>9</b>  |
| 5  | 498.33        | 249.67                |           |                        | 480.32               | 240.66                 | <b>L</b> | <b>895.50</b> | 448.25                | 878.47        | 439.74                 | <b>8</b>  |
| 6  | 626.39        | 313.70                | 609.36    | 305.18                 | 608.38               | 304.69                 | <b>Q</b> | <b>782.42</b> | 391.71                | <b>765.39</b> | 383.20                 | <b>7</b>  |
| 7  | 709.42        | 355.22                | 692.40    | 346.70                 | 691.41               | 346.21                 | <b>M</b> | <b>654.36</b> | 327.68                | 637.33        | 319.17                 | <b>6</b>  |
| 8  | 823.47        | 412.24                | 806.44    | 403.72                 | 805.46               | 403.23                 | <b>N</b> | <b>571.32</b> | <b>286.16</b>         | <b>554.29</b> | 277.65                 | <b>5</b>  |
| 9  | 920.52        | 460.76                | 903.49    | 452.25                 | 902.51               | 451.76                 | <b>P</b> | <b>457.28</b> | 229.14                | 440.25        | 220.63                 | <b>4</b>  |
| 10 | 1019.59       | 510.30                | 1002.56   | 501.78                 | 1001.58              | 501.29                 | <b>V</b> | 360.22        | 180.62                | 343.20        | 172.10                 | <b>3</b>  |
| 11 | 1133.63       | 567.32                | 1116.60   | 558.81                 | 1115.62              | 558.31                 | <b>N</b> | <b>261.16</b> | 131.08                | 244.13        | 122.57                 | <b>2</b>  |
| 12 |               |                       |           |                        |                      |                        | <b>K</b> | <b>147.11</b> | 74.06                 | 130.09        | 65.55                  | <b>1</b>  |

MS/MS Fragmentation of ID622 **QFSYLAR**

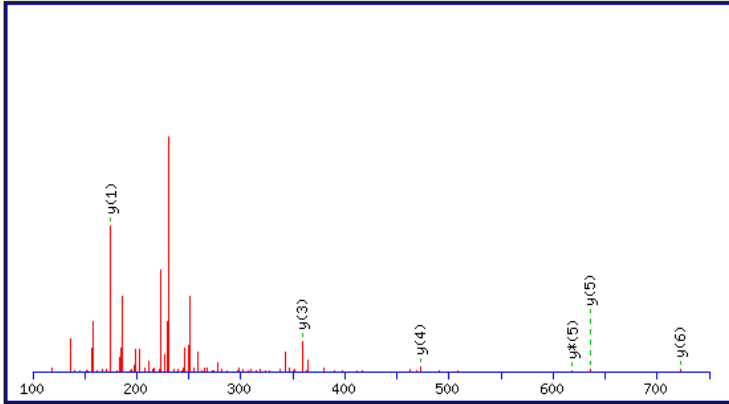

| #        | <b>b</b> | <b>b<sup>++</sup></b> | <b>b<sup>*</sup></b> | <b>b<sup>*++</sup></b> | <b>b<sup>0</sup></b> | <b>b<sup>0++</sup></b> | Seq.     | <b>y</b>      | <b>y<sup>++</sup></b> | <b>y<sup>*</sup></b> | <b>y<sup>*++</sup></b> | <b>y<sup>0</sup></b> | <b>y<sup>0++</sup></b> | #        |
|----------|----------|-----------------------|----------------------|------------------------|----------------------|------------------------|----------|---------------|-----------------------|----------------------|------------------------|----------------------|------------------------|----------|
| <b>1</b> | 129.07   | 65.04                 | 112.04               | 56.52                  |                      |                        | <b>Q</b> |               |                       |                      |                        |                      |                        | <b>8</b> |
| <b>2</b> | 276.13   | 138.57                | 259.11               | 130.06                 |                      |                        | <b>F</b> | 869.49        | 435.25                | 852.46               | 426.73                 | 851.48               | 426.24                 | <b>7</b> |
| <b>3</b> | 363.17   | 182.09                | 346.14               | 173.57                 | 345.16               | 173.08                 | <b>S</b> | <b>722.42</b> | 361.71                | 705.39               | 353.20                 | 704.41               | 352.71                 | <b>6</b> |
| <b>4</b> | 526.23   | 263.62                | 509.20               | 255.11                 | 508.22               | 254.61                 | <b>Y</b> | <b>635.39</b> | 318.20                | <b>618.36</b>        | 309.68                 |                      |                        | <b>5</b> |
| <b>5</b> | 639.31   | 320.16                | 622.29               | 311.65                 | 621.30               | 311.16                 | <b>I</b> | <b>472.32</b> | 236.67                | 455.30               | 228.15                 |                      |                        | <b>4</b> |
| <b>6</b> | 752.40   | 376.70                | 735.37               | 368.19                 | 734.39               | 367.70                 | <b>L</b> | <b>359.24</b> | 180.12                | 342.21               | 171.61                 |                      |                        | <b>3</b> |
| <b>7</b> | 823.43   | 412.22                | 806.41               | 403.71                 | 805.42               | 403.22                 | <b>A</b> | 246.16        | 123.58                | 229.13               | 115.07                 |                      |                        | <b>2</b> |
| <b>8</b> |          |                       |                      |                        |                      |                        | <b>R</b> | <b>175.12</b> | 88.06                 | 158.09               | 79.55                  |                      |                        | <b>1</b> |

MS/MS Fragmentation of ID624 **EIGVLDDWEK**

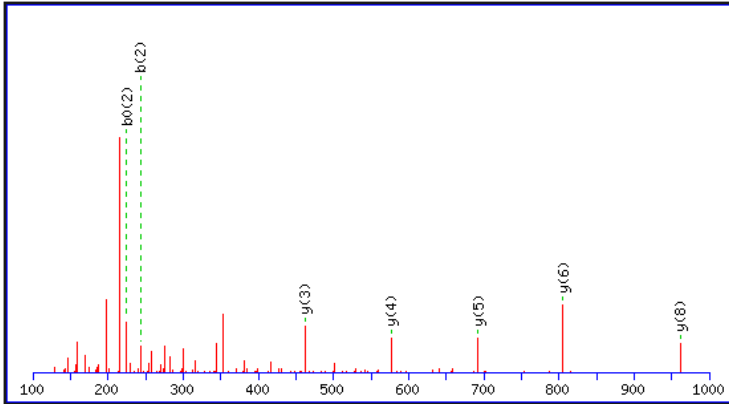

| #         | <b>b</b>      | <b>b<sup>++</sup></b> | <b>b<sup>0</sup></b> | <b>b<sup>0++</sup></b> | Seq.     | <b>y</b>      | <b>y<sup>++</sup></b> | <b>y<sup>*</sup></b> | <b>y<sup>*++</sup></b> | <b>y<sup>0</sup></b> | <b>y<sup>0++</sup></b> | #         |
|-----------|---------------|-----------------------|----------------------|------------------------|----------|---------------|-----------------------|----------------------|------------------------|----------------------|------------------------|-----------|
| <b>1</b>  | 130.05        | 65.53                 | 112.04               | 56.52                  | <b>E</b> |               |                       |                      |                        |                      |                        | <b>10</b> |
| <b>2</b>  | <b>243.13</b> | 122.07                | <b>225.12</b>        | 113.07                 | <b>I</b> | 1074.55       | 537.78                | 1057.52              | 529.26                 | 1056.54              | 528.77                 | <b>9</b>  |
| <b>3</b>  | 300.16        | 150.58                | 282.14               | 141.58                 | <b>G</b> | <b>961.46</b> | 481.23                | 944.44               | 472.72                 | 943.45               | 472.23                 | <b>8</b>  |
| <b>4</b>  | 399.22        | 200.12                | 381.21               | 191.11                 | <b>V</b> | 904.44        | 452.72                | 887.41               | 444.21                 | 886.43               | 443.72                 | <b>7</b>  |
| <b>5</b>  | 512.31        | 256.66                | 494.30               | 247.65                 | <b>L</b> | <b>805.37</b> | 403.19                | 788.35               | 394.68                 | 787.36               | 394.18                 | <b>6</b>  |
| <b>6</b>  | 627.33        | 314.17                | 609.32               | 305.17                 | <b>D</b> | <b>692.29</b> | 346.65                | 675.26               | 338.13                 | 674.28               | 337.64                 | <b>5</b>  |
| <b>7</b>  | 742.36        | 371.68                | 724.35               | 362.68                 | <b>D</b> | <b>577.26</b> | 289.13                | 560.24               | 280.62                 | 559.25               | 280.13                 | <b>4</b>  |
| <b>8</b>  | 928.44        | 464.72                | 910.43               | 455.72                 | <b>W</b> | <b>462.23</b> | 231.62                | 445.21               | 223.11                 | 444.22               | 222.62                 | <b>3</b>  |
| <b>9</b>  | 1057.48       | 529.25                | 1039.47              | 520.24                 | <b>E</b> | 276.16        | 138.58                | 259.13               | 130.07                 | 258.14               | 129.58                 | <b>2</b>  |
| <b>10</b> |               |                       |                      |                        | <b>K</b> | 147.11        | 74.06                 | 130.09               | 65.55                  |                      |                        | <b>1</b>  |

MS/MS Fragmentation of ID626 **LELILFER**

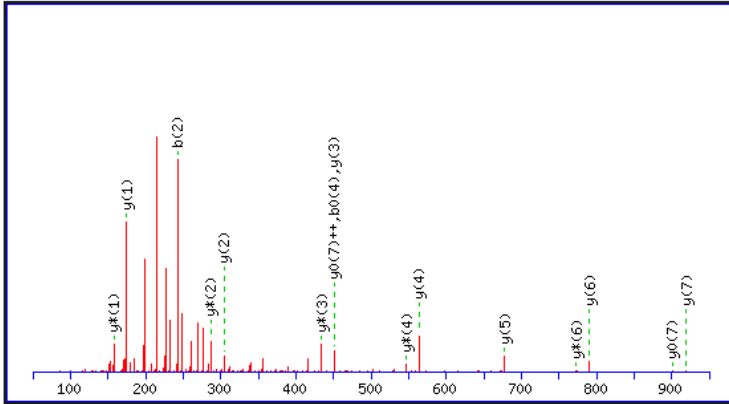

| #        | <b>b</b>      | <b>b<sup>++</sup></b> | <b>b<sup>0</sup></b> | <b>b<sup>0++</sup></b> | Seq.     | <b>y</b>      | <b>y<sup>++</sup></b> | <b>y*</b>     | <b>y<sup>+++</sup></b> | <b>y<sup>0</sup></b> | <b>y<sup>0++</sup></b> | #        |
|----------|---------------|-----------------------|----------------------|------------------------|----------|---------------|-----------------------|---------------|------------------------|----------------------|------------------------|----------|
| <b>1</b> | 114.09        | 57.55                 |                      |                        | <b>L</b> |               |                       |               |                        |                      |                        | <b>8</b> |
| <b>2</b> | <b>243.13</b> | 122.07                | 225.12               | 113.07                 | <b>E</b> | <b>919.52</b> | 460.27                | 902.50        | 451.75                 | <b>901.51</b>        | <b>451.26</b>          | <b>7</b> |
| <b>3</b> | 356.22        | 178.61                | 338.21               | 169.61                 | <b>L</b> | <b>790.48</b> | 395.74                | <b>773.46</b> | 387.23                 | 772.47               | 386.74                 | <b>6</b> |
| <b>4</b> | 469.30        | 235.15                | <b>451.29</b>        | 226.15                 | <b>I</b> | <b>677.40</b> | 339.20                | 660.37        | 330.69                 | 659.39               | 330.20                 | <b>5</b> |
| <b>5</b> | 582.39        | 291.70                | 564.38               | 282.69                 | <b>L</b> | <b>564.31</b> | 282.66                | <b>547.29</b> | 274.15                 | 546.30               | 273.66                 | <b>4</b> |
| <b>6</b> | 729.45        | 365.23                | 711.44               | 356.23                 | <b>F</b> | <b>451.23</b> | 226.12                | <b>434.20</b> | 217.61                 | 433.22               | 217.11                 | <b>3</b> |
| <b>7</b> | 858.50        | 429.75                | 840.49               | 420.75                 | <b>E</b> | <b>304.16</b> | 152.58                | <b>287.13</b> | 144.07                 | 286.15               | 143.58                 | <b>2</b> |
| <b>8</b> |               |                       |                      |                        | <b>R</b> | <b>175.12</b> | 88.06                 | <b>158.09</b> | 79.55                  |                      |                        | <b>1</b> |



MS/MS Fragmentation of ID627 **AQDFPLRDPVAFFR**

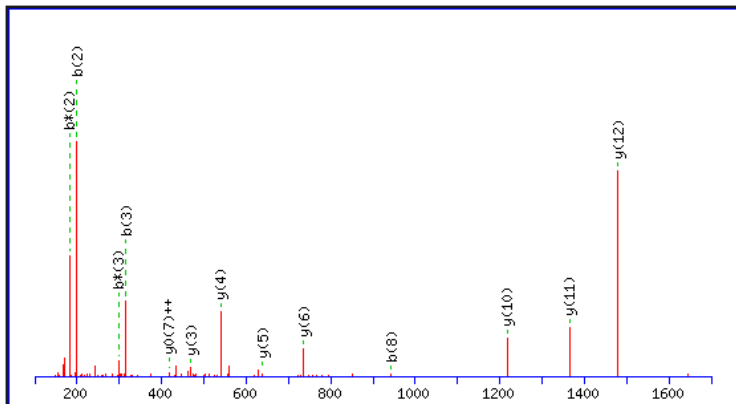

| #  | b             | b <sup>++</sup> | b*            | b <sup>*++</sup> | b <sup>0</sup> | b <sup>0++</sup> | Seq. | y              | y <sup>++</sup> | y*      | y <sup>*++</sup> | y <sup>0</sup> | y <sup>0++</sup> | #  |
|----|---------------|-----------------|---------------|------------------|----------------|------------------|------|----------------|-----------------|---------|------------------|----------------|------------------|----|
| 1  | 72.04         | 36.53           |               |                  |                |                  | A    |                |                 |         |                  |                |                  | 14 |
| 2  | <b>200.10</b> | 100.56          | <b>183.08</b> | 92.04            |                |                  | Q    | 1607.83        | 804.42          | 1590.81 | 795.91           | 1589.82        | 795.41           | 13 |
| 3  | <b>315.13</b> | 158.07          | <b>298.10</b> | 149.56           | 297.12         | 149.06           | D    | <b>1479.77</b> | 740.39          | 1462.75 | 731.88           | 1461.76        | 731.39           | 12 |
| 4  | 462.20        | 231.60          | 445.17        | 223.09           | 444.19         | 222.60           | F    | <b>1364.75</b> | 682.88          | 1347.72 | 674.36           | 1346.74        | 673.87           | 11 |
| 5  | 559.25        | 280.13          | 542.22        | 271.62           | 541.24         | 271.12           | P    | <b>1217.68</b> | 609.34          | 1200.65 | 600.83           | 1199.67        | 600.34           | 10 |
| 6  | 672.34        | 336.67          | 655.31        | 328.16           | 654.32         | 327.67           | L    | 1120.63        | 560.82          | 1103.60 | 552.30           | 1102.62        | 551.81           | 9  |
| 7  | 828.44        | 414.72          | 811.41        | 406.21           | 810.43         | 405.72           | R    | 1007.54        | 504.27          | 990.52  | 495.76           | 989.53         | 495.27           | 8  |
| 8  | <b>943.46</b> | 472.24          | 926.44        | 463.72           | 925.45         | 463.23           | D    | 851.44         | 426.22          | 834.41  | 417.71           | 833.43         | <b>417.22</b>    | 7  |
| 9  | 1040.52       | 520.76          | 1023.49       | 512.25           | 1022.51        | 511.76           | P    | <b>736.41</b>  | 368.71          | 719.39  | 360.20           |                |                  | 6  |
| 10 | 1139.58       | 570.30          | 1122.56       | 561.78           | 1121.57        | 561.29           | V    | <b>639.36</b>  | 320.18          | 622.33  | 311.67           |                |                  | 5  |
| 11 | 1210.62       | 605.81          | 1193.59       | 597.30           | 1192.61        | 596.81           | A    | <b>540.29</b>  | 270.65          | 523.27  | 262.14           |                |                  | 4  |
| 12 | 1357.69       | 679.35          | 1340.66       | 670.84           | 1339.68        | 670.34           | F    | <b>469.26</b>  | 235.13          | 452.23  | 226.62           |                |                  | 3  |
| 13 | 1504.76       | 752.88          | 1487.73       | 744.37           | 1486.75        | 743.88           | F    | 322.19         | 161.60          | 305.16  | 153.08           |                |                  | 2  |
| 14 |               |                 |               |                  |                |                  | R    | 175.12         | 88.06           | 158.09  | 79.55            |                |                  | 1  |

MS/MS Fragmentation of ID633 **SLLDEQNFQVR**

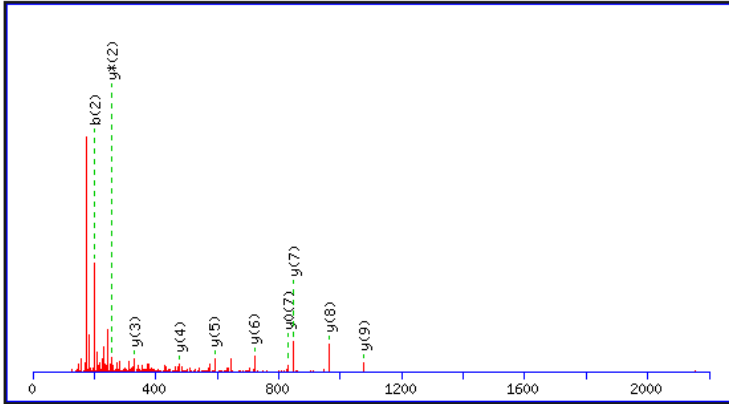

| #         | <b>b</b>      | <b>b<sup>++</sup></b> | <b>b*</b> | <b>b<sup>+++</sup></b> | <b>b<sup>0</sup></b> | <b>b<sup>0++</sup></b> | Seq.     | <b>y</b>       | <b>y<sup>++</sup></b> | <b>y*</b>     | <b>y<sup>+++</sup></b> | <b>y<sup>0</sup></b> | <b>y<sup>0++</sup></b> | #         |
|-----------|---------------|-----------------------|-----------|------------------------|----------------------|------------------------|----------|----------------|-----------------------|---------------|------------------------|----------------------|------------------------|-----------|
| <b>1</b>  | 88.04         | 44.52                 |           |                        | 70.03                | 35.52                  | <b>S</b> |                |                       |               |                        |                      |                        | <b>11</b> |
| <b>2</b>  | <b>201.12</b> | 101.07                |           |                        | 183.11               | 92.06                  | <b>L</b> | 1190.62        | 595.81                | 1173.59       | 587.30                 | 1172.61              | 586.81                 | <b>10</b> |
| <b>3</b>  | 314.21        | 157.61                |           |                        | 296.20               | 148.60                 | <b>L</b> | <b>1077.53</b> | 539.27                | 1060.51       | 530.76                 | 1059.52              | 530.26                 | <b>9</b>  |
| <b>4</b>  | 429.23        | 215.12                |           |                        | 411.22               | 206.12                 | <b>D</b> | <b>964.45</b>  | 482.73                | 947.42        | 474.21                 | 946.44               | 473.72                 | <b>8</b>  |
| <b>5</b>  | 558.28        | 279.64                |           |                        | 540.27               | 270.64                 | <b>E</b> | <b>849.42</b>  | 425.21                | 832.39        | 416.70                 | <b>831.41</b>        | 416.21                 | <b>7</b>  |
| <b>6</b>  | 686.34        | 343.67                | 669.31    | 335.16                 | 668.32               | 334.67                 | <b>Q</b> | <b>720.38</b>  | 360.69                | 703.35        | 352.18                 |                      |                        | <b>6</b>  |
| <b>7</b>  | 800.38        | 400.69                | 783.35    | 392.18                 | 782.37               | 391.69                 | <b>N</b> | <b>592.32</b>  | 296.66                | 575.29        | 288.15                 |                      |                        | <b>5</b>  |
| <b>8</b>  | 947.45        | 474.23                | 930.42    | 465.71                 | 929.44               | 465.22                 | <b>F</b> | <b>478.28</b>  | 239.64                | 461.25        | 231.13                 |                      |                        | <b>4</b>  |
| <b>9</b>  | 1004.47       | 502.74                | 987.44    | 494.22                 | 986.46               | 493.73                 | <b>G</b> | <b>331.21</b>  | 166.11                | 314.18        | 157.59                 |                      |                        | <b>3</b>  |
| <b>10</b> | 1103.54       | 552.27                | 1086.51   | 543.76                 | 1085.53              | 543.27                 | <b>V</b> | 274.19         | 137.60                | <b>257.16</b> | 129.08                 |                      |                        | <b>2</b>  |
| <b>11</b> |               |                       |           |                        |                      |                        | <b>R</b> | 175.12         | 88.06                 | 158.09        | 79.55                  |                      |                        | <b>1</b>  |

MS/MS Fragmentation of ID635 **IGGAEDVFGDIR**

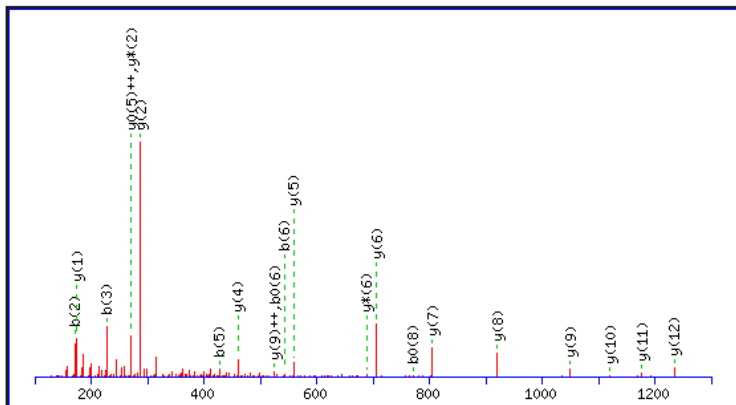

| #  | b             | b <sup>++</sup> | b <sup>0</sup> | b <sup>0++</sup> | Seq. | y              | y <sup>++</sup> | y <sup>*</sup> | y <sup>*++</sup> | y <sup>0</sup> | y <sup>0++</sup> | #  |
|----|---------------|-----------------|----------------|------------------|------|----------------|-----------------|----------------|------------------|----------------|------------------|----|
| 1  | 114.09        | 57.55           |                |                  | I    |                |                 |                |                  |                |                  | 13 |
| 2  | <b>171.11</b> | 86.06           |                |                  | G    | <b>1234.61</b> | 617.81          | 1217.58        | 609.29           | 1216.60        | 608.80           | 12 |
| 3  | <b>228.13</b> | 114.57          |                |                  | G    | <b>1177.58</b> | 589.30          | 1160.56        | 580.78           | 1159.57        | 580.29           | 11 |
| 4  | 299.17        | 150.09          |                |                  | A    | <b>1120.56</b> | 560.79          | 1103.54        | 552.27           | 1102.55        | 551.78           | 10 |
| 5  | <b>428.21</b> | 214.61          | 410.20         | 205.61           | E    | <b>1049.53</b> | <b>525.27</b>   | 1032.50        | 516.75           | 1031.52        | 516.26           | 9  |
| 6  | <b>543.24</b> | 272.12          | <b>525.23</b>  | 263.12           | D    | <b>920.48</b>  | 460.75          | 903.46         | 452.23           | 902.47         | 451.74           | 8  |
| 7  | 642.31        | 321.66          | 624.30         | 312.65           | V    | <b>805.46</b>  | 403.23          | 788.43         | 394.72           | 787.45         | 394.23           | 7  |
| 8  | 789.38        | 395.19          | <b>771.37</b>  | 386.19           | F    | <b>706.39</b>  | 353.70          | <b>689.36</b>  | 345.18           | 688.38         | 344.69           | 6  |
| 9  | 888.45        | 444.73          | 870.44         | 435.72           | V    | <b>559.32</b>  | 280.16          | 542.29         | 271.65           | 541.31         | <b>271.16</b>    | 5  |
| 10 | 945.47        | 473.24          | 927.46         | 464.23           | G    | <b>460.25</b>  | 230.63          | 443.22         | 222.12           | 442.24         | 221.62           | 4  |
| 11 | 1060.49       | 530.75          | 1042.48        | 521.75           | D    | 403.23         | 202.12          | 386.20         | 193.61           | 385.22         | 193.11           | 3  |
| 12 | 1173.58       | 587.29          | 1155.57        | 578.29           | I    | <b>288.20</b>  | 144.61          | <b>271.18</b>  | 136.09           |                |                  | 2  |
| 13 |               |                 |                |                  | R    | <b>175.12</b>  | 88.06           | 158.09         | 79.55            |                |                  | 1  |

MS/MS Fragmentation of ID636 **GVVIDGSTVR**

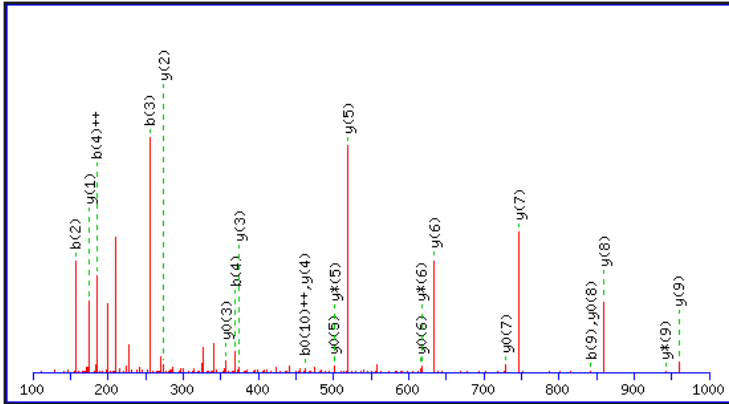

| #         | b             | b <sup>++</sup> | b <sup>0</sup> | b <sup>0++</sup> | Seq.     | y             | y <sup>++</sup> | y*            | y <sup>+++</sup> | y <sup>0</sup> | y <sup>0++</sup> | #         |
|-----------|---------------|-----------------|----------------|------------------|----------|---------------|-----------------|---------------|------------------|----------------|------------------|-----------|
| <b>1</b>  | 58.03         | 29.52           |                |                  | <b>G</b> |               |                 |               |                  |                |                  | <b>11</b> |
| <b>2</b>  | <b>157.10</b> | 79.05           |                |                  | <b>V</b> | 1058.62       | 529.81          | 1041.59       | 521.30           | 1040.61        | 520.81           | <b>10</b> |
| <b>3</b>  | <b>256.17</b> | 128.59          |                |                  | <b>V</b> | <b>959.55</b> | 480.28          | <b>942.53</b> | 471.77           | 941.54         | 471.27           | <b>9</b>  |
| <b>4</b>  | <b>369.25</b> | <b>185.13</b>   |                |                  | <b>I</b> | <b>860.48</b> | 430.75          | 843.46        | 422.23           | <b>842.47</b>  | 421.74           | <b>8</b>  |
| <b>5</b>  | 482.33        | 241.67          |                |                  | <b>I</b> | <b>747.40</b> | 374.20          | 730.37        | 365.69           | <b>729.39</b>  | 365.20           | <b>7</b>  |
| <b>6</b>  | 597.36        | 299.18          | 579.35         | 290.18           | <b>D</b> | <b>634.32</b> | 317.66          | <b>617.29</b> | 309.15           | <b>616.30</b>  | 308.66           | <b>6</b>  |
| <b>7</b>  | 654.38        | 327.69          | 636.37         | 318.69           | <b>G</b> | <b>519.29</b> | 260.15          | <b>502.26</b> | 251.63           | <b>501.28</b>  | 251.14           | <b>5</b>  |
| <b>8</b>  | 741.41        | 371.21          | 723.40         | 362.21           | <b>S</b> | <b>462.27</b> | 231.64          | 445.24        | 223.12           | 444.26         | 222.63           | <b>4</b>  |
| <b>9</b>  | <b>842.46</b> | 421.73          | 824.45         | 412.73           | <b>T</b> | <b>375.24</b> | 188.12          | 358.21        | 179.61           | <b>357.22</b>  | 179.12           | <b>3</b>  |
| <b>10</b> | 941.53        | 471.27          | 923.52         | <b>462.26</b>    | <b>V</b> | <b>274.19</b> | 137.60          | 257.16        | 129.08           |                |                  | <b>2</b>  |
| <b>11</b> |               |                 |                |                  | <b>R</b> | <b>175.12</b> | 88.06           | 158.09        | 79.55            |                |                  | <b>1</b>  |

MS/MS Fragmentation of ID639 **LGALGLLLETAR**

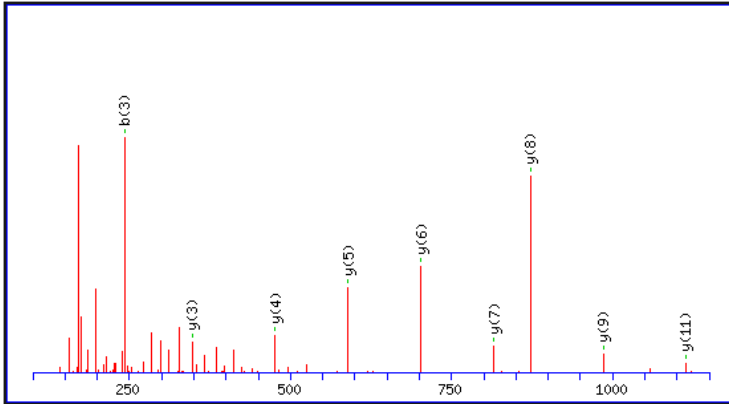

| #         | <b>b</b>      | <b>b<sup>++</sup></b> | <b>b<sup>0</sup></b> | <b>b<sup>0++</sup></b> | Seq.     | <b>y</b>       | <b>y<sup>++</sup></b> | <b>y<sup>*</sup></b> | <b>y<sup>*++</sup></b> | <b>y<sup>0</sup></b> | <b>y<sup>0++</sup></b> | #         |
|-----------|---------------|-----------------------|----------------------|------------------------|----------|----------------|-----------------------|----------------------|------------------------|----------------------|------------------------|-----------|
| <b>1</b>  | 114.09        | 57.55                 |                      |                        | <b>L</b> |                |                       |                      |                        |                      |                        | <b>12</b> |
| <b>2</b>  | 171.11        | 86.06                 |                      |                        | <b>G</b> | <b>1113.66</b> | 557.33                | 1096.64              | 548.82                 | 1095.65              | 548.33                 | <b>11</b> |
| <b>3</b>  | <b>242.15</b> | 121.58                |                      |                        | <b>A</b> | 1056.64        | 528.82                | 1039.61              | 520.31                 | 1038.63              | 519.82                 | <b>10</b> |
| <b>4</b>  | 355.23        | 178.12                |                      |                        | <b>L</b> | <b>985.60</b>  | 493.31                | 968.58               | 484.79                 | 967.59               | 484.30                 | <b>9</b>  |
| <b>5</b>  | 412.26        | 206.63                |                      |                        | <b>G</b> | <b>872.52</b>  | 436.76                | 855.49               | 428.25                 | 854.51               | 427.76                 | <b>8</b>  |
| <b>6</b>  | 525.34        | 263.17                |                      |                        | <b>L</b> | <b>815.50</b>  | 408.25                | 798.47               | 399.74                 | 797.49               | 399.25                 | <b>7</b>  |
| <b>7</b>  | 638.42        | 319.72                |                      |                        | <b>L</b> | <b>702.41</b>  | 351.71                | 685.39               | 343.20                 | 684.40               | 342.71                 | <b>6</b>  |
| <b>8</b>  | 751.51        | 376.26                |                      |                        | <b>L</b> | <b>589.33</b>  | 295.17                | 572.30               | 286.66                 | 571.32               | 286.16                 | <b>5</b>  |
| <b>9</b>  | 880.55        | 440.78                | 862.54               | 431.77                 | <b>E</b> | <b>476.25</b>  | 238.63                | 459.22               | 230.11                 | 458.24               | 229.62                 | <b>4</b>  |
| <b>10</b> | 981.60        | 491.30                | 963.59               | 482.30                 | <b>T</b> | <b>347.20</b>  | 174.11                | 330.18               | 165.59                 | 329.19               | 165.10                 | <b>3</b>  |
| <b>11</b> | 1052.63       | 526.82                | 1034.62              | 517.82                 | <b>A</b> | 246.16         | 123.58                | 229.13               | 115.07                 |                      |                        | <b>2</b>  |
| <b>12</b> |               |                       |                      |                        | <b>R</b> | 175.12         | 88.06                 | 158.09               | 79.55                  |                      |                        | <b>1</b>  |

MS/MS Fragmentation of ID640 **LTVLTSAFK**

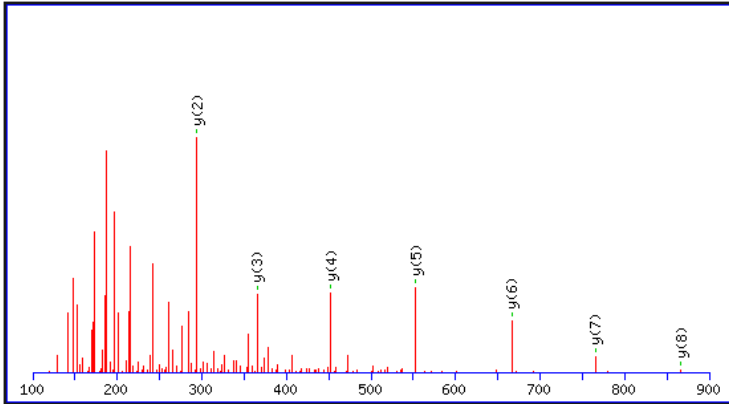

| #        | <b>b</b> | <b>b<sup>++</sup></b> | <b>b<sup>0</sup></b> | <b>b<sup>0++</sup></b> | <b>Seq.</b> | <b>y</b>      | <b>y<sup>++</sup></b> | <b>y<sup>*</sup></b> | <b>y<sup>+++</sup></b> | <b>y<sup>0</sup></b> | <b>y<sup>0++</sup></b> | #        |
|----------|----------|-----------------------|----------------------|------------------------|-------------|---------------|-----------------------|----------------------|------------------------|----------------------|------------------------|----------|
| <b>1</b> | 114.09   | 57.55                 |                      |                        | <b>L</b>    |               |                       |                      |                        |                      |                        | <b>9</b> |
| <b>2</b> | 215.14   | 108.07                | 197.13               | 99.07                  | <b>T</b>    | <b>866.50</b> | 433.75                | 849.47               | 425.24                 | 848.49               | 424.75                 | <b>8</b> |
| <b>3</b> | 314.21   | 157.61                | 296.20               | 148.60                 | <b>V</b>    | <b>765.45</b> | 383.23                | 748.42               | 374.72                 | 747.44               | 374.22                 | <b>7</b> |
| <b>4</b> | 427.29   | 214.15                | 409.28               | 205.14                 | <b>L</b>    | <b>666.38</b> | 333.69                | 649.36               | 325.18                 | 648.37               | 324.69                 | <b>6</b> |
| <b>5</b> | 528.34   | 264.67                | 510.33               | 255.67                 | <b>T</b>    | <b>553.30</b> | 277.15                | 536.27               | 268.64                 | 535.29               | 268.15                 | <b>5</b> |
| <b>6</b> | 615.37   | 308.19                | 597.36               | 299.18                 | <b>S</b>    | <b>452.25</b> | 226.63                | 435.22               | 218.12                 | 434.24               | 217.62                 | <b>4</b> |
| <b>7</b> | 686.41   | 343.71                | 668.40               | 334.70                 | <b>A</b>    | <b>365.22</b> | 183.11                | 348.19               | 174.60                 |                      |                        | <b>3</b> |
| <b>8</b> | 833.48   | 417.24                | 815.47               | 408.24                 | <b>F</b>    | <b>294.18</b> | 147.59                | 277.15               | 139.08                 |                      |                        | <b>2</b> |
| <b>9</b> |          |                       |                      |                        | <b>K</b>    | 147.11        | 74.06                 | 130.09               | 65.55                  |                      |                        | <b>1</b> |

MS/MS Fragmentation of ID641 **SSGSLIGSSIASIQK**

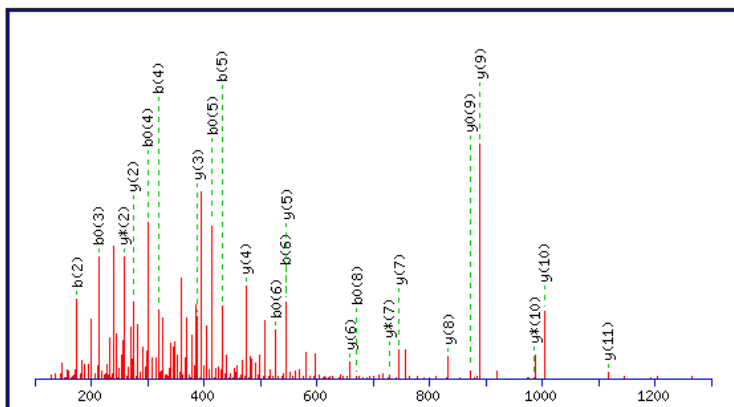

| #  | b             | b <sup>++</sup> | b*      | b <sup>*++</sup> | b <sup>0</sup> | b <sup>0++</sup> | Seq. | y              | y <sup>++</sup> | y*            | y <sup>*++</sup> | y <sup>0</sup> | y <sup>0++</sup> | #  |
|----|---------------|-----------------|---------|------------------|----------------|------------------|------|----------------|-----------------|---------------|------------------|----------------|------------------|----|
| 1  | 88.04         | 44.52           |         |                  | 70.03          | 35.52            | S    |                |                 |               |                  |                |                  | 15 |
| 2  | <b>175.07</b> | 88.04           |         |                  | 157.06         | 79.03            | S    | 1347.75        | 674.38          | 1330.72       | 665.86           | 1329.74        | 665.37           | 14 |
| 3  | 232.09        | 116.55          |         |                  | <b>214.08</b>  | 107.54           | G    | 1260.72        | 630.86          | 1243.69       | 622.35           | 1242.71        | 621.86           | 13 |
| 4  | <b>319.12</b> | 160.07          |         |                  | <b>301.11</b>  | 151.06           | S    | 1203.69        | 602.35          | 1186.67       | 593.84           | 1185.68        | 593.35           | 12 |
| 5  | <b>432.21</b> | 216.61          |         |                  | <b>414.20</b>  | 207.60           | L    | <b>1116.66</b> | 558.83          | 1099.64       | 550.32           | 1098.65        | 549.83           | 11 |
| 6  | <b>545.29</b> | 273.15          |         |                  | <b>527.28</b>  | 264.14           | I    | <b>1003.58</b> | 502.29          | <b>986.55</b> | 493.78           | 985.57         | 493.29           | 10 |
| 7  | 602.31        | 301.66          |         |                  | 584.30         | 292.66           | G    | <b>890.49</b>  | 445.75          | 873.47        | 437.24           | <b>872.48</b>  | 436.75           | 9  |
| 8  | 689.35        | 345.18          |         |                  | <b>671.34</b>  | 336.17           | S    | <b>833.47</b>  | 417.24          | 816.45        | 408.73           | 815.46         | 408.23           | 8  |
| 9  | 776.38        | 388.69          |         |                  | 758.37         | 379.69           | S    | <b>746.44</b>  | 373.72          | <b>729.41</b> | 365.21           | 728.43         | 364.72           | 7  |
| 10 | 889.46        | 445.23          |         |                  | 871.45         | 436.23           | I    | <b>659.41</b>  | 330.21          | 642.38        | 321.69           | 641.40         | 321.20           | 6  |
| 11 | 960.50        | 480.75          |         |                  | 942.49         | 471.75           | A    | <b>546.32</b>  | 273.67          | 529.30        | 265.15           | 528.31         | 264.66           | 5  |
| 12 | 1047.53       | 524.27          |         |                  | 1029.52        | 515.26           | S    | <b>475.29</b>  | 238.15          | 458.26        | 229.63           | 457.28         | 229.14           | 4  |
| 13 | 1160.62       | 580.81          |         |                  | 1142.61        | 571.81           | I    | <b>388.26</b>  | 194.63          | 371.23        | 186.12           |                |                  | 3  |
| 14 | 1288.67       | 644.84          | 1271.65 | 636.33           | 1270.66        | 635.84           | Q    | <b>275.17</b>  | 138.09          | <b>258.14</b> | 129.58           |                |                  | 2  |
| 15 |               |                 |         |                  |                |                  | K    | 147.11         | 74.06           | 130.09        | 65.55            |                |                  | 1  |

MS/MS Fragmentation of ID642 **SRFLAGAPSK**

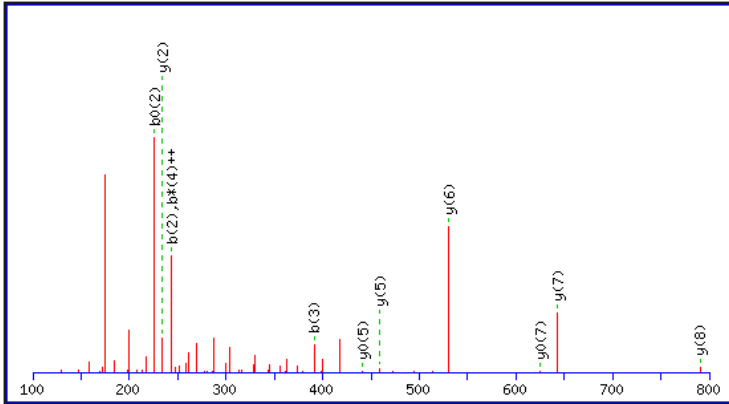

| #         | <b>b</b>      | <b>b<sup>++</sup></b> | <b>b<sup>*</sup></b> | <b>b<sup>*++</sup></b> | <b>b<sup>0</sup></b> | <b>b<sup>0++</sup></b> | Seq.     | <b>y</b>      | <b>y<sup>++</sup></b> | <b>y<sup>*</sup></b> | <b>y<sup>*++</sup></b> | <b>y<sup>0</sup></b> | <b>y<sup>0++</sup></b> | #         |
|-----------|---------------|-----------------------|----------------------|------------------------|----------------------|------------------------|----------|---------------|-----------------------|----------------------|------------------------|----------------------|------------------------|-----------|
| <b>1</b>  | 88.04         | 44.52                 |                      |                        | 70.03                | 35.52                  | <b>S</b> |               |                       |                      |                        |                      |                        | <b>10</b> |
| <b>2</b>  | <b>244.14</b> | 122.57                | 227.11               | 114.06                 | <b>226.13</b>        | 113.57                 | <b>R</b> | 946.55        | 473.78                | 929.52               | 465.26                 | 928.54               | 464.77                 | <b>9</b>  |
| <b>3</b>  | <b>391.21</b> | 196.11                | 374.18               | 187.59                 | 373.20               | 187.10                 | <b>F</b> | <b>790.45</b> | 395.73                | 773.42               | 387.21                 | 772.44               | 386.72                 | <b>8</b>  |
| <b>4</b>  | 504.29        | 252.65                | 487.27               | <b>244.14</b>          | 486.28               | 243.64                 | <b>L</b> | <b>643.38</b> | 322.19                | 626.35               | 313.68                 | <b>625.37</b>        | 313.19                 | <b>7</b>  |
| <b>5</b>  | 575.33        | 288.17                | 558.30               | 279.66                 | 557.32               | 279.16                 | <b>A</b> | <b>530.29</b> | 265.65                | 513.27               | 257.14                 | 512.28               | 256.64                 | <b>6</b>  |
| <b>6</b>  | 632.35        | 316.68                | 615.32               | 308.17                 | 614.34               | 307.67                 | <b>G</b> | <b>459.26</b> | 230.13                | 442.23               | 221.62                 | <b>441.25</b>        | 221.13                 | <b>5</b>  |
| <b>7</b>  | 703.39        | 352.20                | 686.36               | 343.68                 | 685.38               | 343.19                 | <b>A</b> | 402.23        | 201.62                | 385.21               | 193.11                 | 384.22               | 192.62                 | <b>4</b>  |
| <b>8</b>  | 800.44        | 400.72                | 783.41               | 392.21                 | 782.43               | 391.72                 | <b>P</b> | 331.20        | 166.10                | 314.17               | 157.59                 | 313.19               | 157.10                 | <b>3</b>  |
| <b>9</b>  | 887.47        | 444.24                | 870.45               | 435.73                 | 869.46               | 435.24                 | <b>S</b> | <b>234.14</b> | 117.58                | 217.12               | 109.06                 | 216.13               | 108.57                 | <b>2</b>  |
| <b>10</b> |               |                       |                      |                        |                      |                        | <b>K</b> | 147.11        | 74.06                 | 130.09               | 65.55                  |                      |                        | <b>1</b>  |



MS/MS Fragmentation of ID644 **LGEVPENLER**

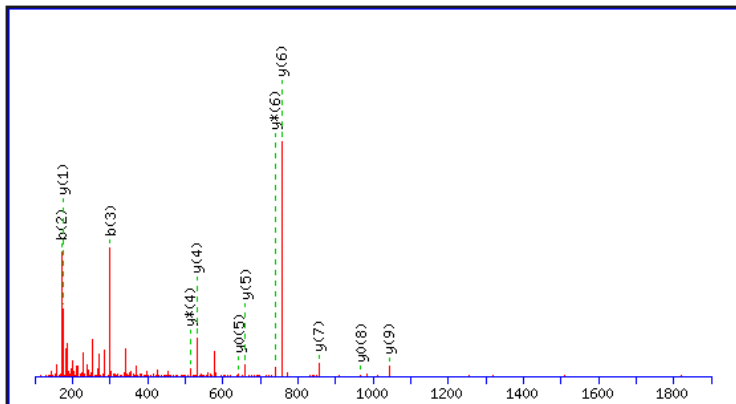

| #         | <b>b</b>      | <b>b<sup>++</sup></b> | <b>b<sup>*</sup></b> | <b>b<sup>+++</sup></b> | <b>b<sup>0</sup></b> | <b>b<sup>0++</sup></b> | Seq.     | <b>y</b>       | <b>y<sup>++</sup></b> | <b>y<sup>*</sup></b> | <b>y<sup>+++</sup></b> | <b>y<sup>0</sup></b> | <b>y<sup>0++</sup></b> | #         |
|-----------|---------------|-----------------------|----------------------|------------------------|----------------------|------------------------|----------|----------------|-----------------------|----------------------|------------------------|----------------------|------------------------|-----------|
| <b>1</b>  | 114.09        | 57.55                 |                      |                        |                      |                        | <b>L</b> |                |                       |                      |                        |                      |                        | <b>10</b> |
| <b>2</b>  | <b>171.11</b> | 86.06                 |                      |                        |                      |                        | <b>G</b> | <b>1042.52</b> | 521.76                | 1025.49              | 513.25                 | 1024.51              | 512.76                 | <b>9</b>  |
| <b>3</b>  | <b>300.16</b> | 150.58                |                      |                        | 282.14               | 141.58                 | <b>E</b> | 985.49         | 493.25                | 968.47               | 484.74                 | <b>967.48</b>        | 484.25                 | <b>8</b>  |
| <b>4</b>  | 399.22        | 200.12                |                      |                        | 381.21               | 191.11                 | <b>V</b> | <b>856.45</b>  | 428.73                | 839.43               | 420.22                 | 838.44               | 419.72                 | <b>7</b>  |
| <b>5</b>  | 496.28        | 248.64                |                      |                        | 478.27               | 239.64                 | <b>P</b> | <b>757.38</b>  | 379.20                | <b>740.36</b>        | 370.68                 | 739.37               | 370.19                 | <b>6</b>  |
| <b>6</b>  | 625.32        | 313.16                |                      |                        | 607.31               | 304.16                 | <b>E</b> | <b>660.33</b>  | 330.67                | 643.30               | 322.16                 | <b>642.32</b>        | 321.66                 | <b>5</b>  |
| <b>7</b>  | 739.36        | 370.18                | 722.34               | 361.67                 | 721.35               | 361.18                 | <b>N</b> | <b>531.29</b>  | 266.15                | <b>514.26</b>        | 257.63                 | 513.28               | 257.14                 | <b>4</b>  |
| <b>8</b>  | 852.45        | 426.73                | 835.42               | 418.21                 | 834.44               | 417.72                 | <b>L</b> | 417.25         | 209.13                | 400.22               | 200.61                 | 399.24               | 200.12                 | <b>3</b>  |
| <b>9</b>  | 981.49        | 491.25                | 964.46               | 482.73                 | 963.48               | 482.24                 | <b>E</b> | 304.16         | 152.58                | 287.13               | 144.07                 | 286.15               | 143.58                 | <b>2</b>  |
| <b>10</b> |               |                       |                      |                        |                      |                        | <b>R</b> | <b>175.12</b>  | 88.06                 | 158.09               | 79.55                  |                      |                        | <b>1</b>  |

MS/MS Fragmentation of ID650 **FFAMSNLSR**

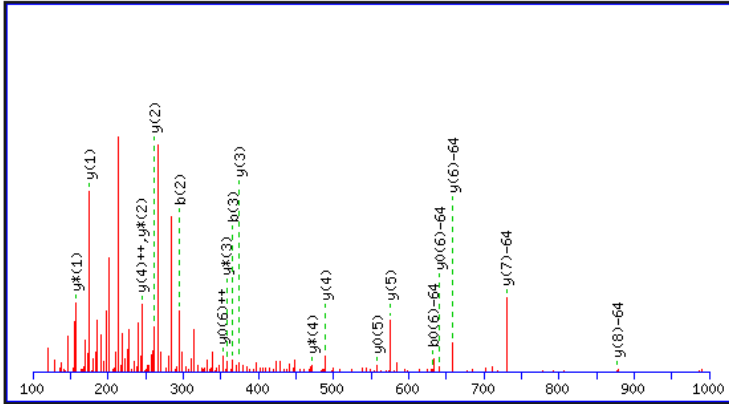

| #        | <b>b</b>      | <b>b<sup>++</sup></b> | <b>b<sup>*</sup></b> | <b>b<sup>*++</sup></b> | <b>b<sup>0</sup></b> | <b>b<sup>0++</sup></b> | Seq.     | <b>y</b>      | <b>y<sup>++</sup></b> | <b>y<sup>*</sup></b> | <b>y<sup>*++</sup></b> | <b>y<sup>0</sup></b> | <b>y<sup>0++</sup></b> | #        |
|----------|---------------|-----------------------|----------------------|------------------------|----------------------|------------------------|----------|---------------|-----------------------|----------------------|------------------------|----------------------|------------------------|----------|
| <b>1</b> | 148.08        | 74.54                 |                      |                        |                      |                        | <b>F</b> |               |                       |                      |                        |                      |                        | <b>9</b> |
| <b>2</b> | <b>295.14</b> | 148.08                |                      |                        |                      |                        | <b>F</b> | <b>877.45</b> | 439.23                | 860.43               | 430.72                 | 859.44               | 430.22                 | <b>8</b> |
| <b>3</b> | <b>366.18</b> | 183.59                |                      |                        |                      |                        | <b>A</b> | <b>730.38</b> | 365.70                | 713.36               | 357.18                 | 712.37               | 356.69                 | <b>7</b> |
| <b>4</b> | 449.22        | 225.11                |                      |                        |                      |                        | <b>M</b> | <b>659.35</b> | 330.18                | 642.32               | 321.66                 | <b>641.34</b>        | 321.17                 | <b>6</b> |
| <b>5</b> | 536.25        | 268.63                |                      |                        | 518.24               | 259.62                 | <b>S</b> | <b>576.31</b> | 288.66                | 559.28               | 280.15                 | <b>558.30</b>        | 279.65                 | <b>5</b> |
| <b>6</b> | 650.29        | 325.65                | 633.27               | 317.14                 | <b>632.28</b>        | 316.65                 | <b>N</b> | <b>489.28</b> | <b>245.14</b>         | <b>472.25</b>        | 236.63                 | 471.27               | 236.14                 | <b>4</b> |
| <b>7</b> | 763.38        | 382.19                | 746.35               | 373.68                 | 745.37               | 373.19                 | <b>L</b> | <b>375.24</b> | 188.12                | <b>358.21</b>        | 179.61                 | 357.22               | 179.12                 | <b>3</b> |
| <b>8</b> | 850.41        | 425.71                | 833.38               | 417.20                 | 832.40               | 416.70                 | <b>S</b> | <b>262.15</b> | 131.58                | <b>245.12</b>        | 123.07                 | 244.14               | 122.57                 | <b>2</b> |
| <b>9</b> |               |                       |                      |                        |                      |                        | <b>R</b> | <b>175.12</b> | 88.06                 | <b>158.09</b>        | 79.55                  |                      |                        | <b>1</b> |

MS/MS Fragmentation of ID651 **DTIASGEGPIK**

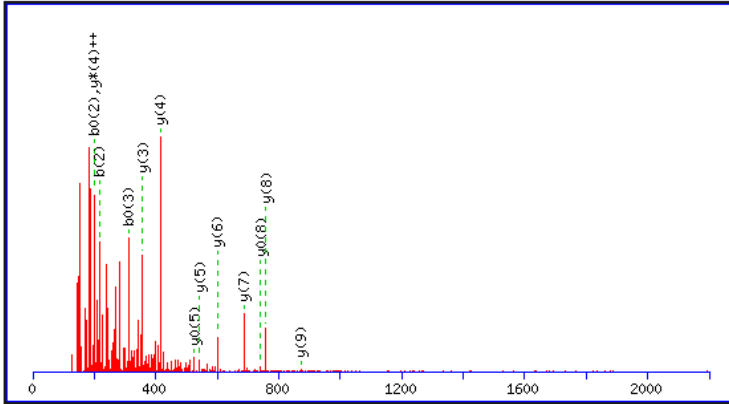

| #         | <b>b</b>      | <b>b<sup>++</sup></b> | <b>b<sup>0</sup></b> | <b>b<sup>0++</sup></b> | Seq.     | <b>y</b>      | <b>y<sup>++</sup></b> | <b>y<sup>*</sup></b> | <b>y<sup>*++</sup></b> | <b>y<sup>0</sup></b> | <b>y<sup>0++</sup></b> | #         |
|-----------|---------------|-----------------------|----------------------|------------------------|----------|---------------|-----------------------|----------------------|------------------------|----------------------|------------------------|-----------|
| <b>1</b>  | 116.03        | 58.52                 | 98.02                | 49.52                  | <b>D</b> |               |                       |                      |                        |                      |                        | <b>11</b> |
| <b>2</b>  | <b>217.08</b> | 109.04                | <b>199.07</b>        | 100.04                 | <b>T</b> | 972.54        | 486.77                | 955.51               | 478.26                 | 954.53               | 477.77                 | <b>10</b> |
| <b>3</b>  | 330.17        | 165.59                | <b>312.16</b>        | 156.58                 | <b>I</b> | <b>871.49</b> | 436.25                | 854.46               | 427.73                 | 853.48               | 427.24                 | <b>9</b>  |
| <b>4</b>  | 401.20        | 201.11                | 383.19               | 192.10                 | <b>A</b> | <b>758.40</b> | 379.71                | 741.38               | 371.19                 | <b>740.39</b>        | 370.70                 | <b>8</b>  |
| <b>5</b>  | 488.24        | 244.62                | 470.22               | 235.62                 | <b>S</b> | <b>687.37</b> | 344.19                | 670.34               | 335.67                 | 669.36               | 335.18                 | <b>7</b>  |
| <b>6</b>  | 545.26        | 273.13                | 527.25               | 264.13                 | <b>G</b> | <b>600.34</b> | 300.67                | 583.31               | 292.16                 | 582.32               | 291.67                 | <b>6</b>  |
| <b>7</b>  | 674.30        | 337.65                | 656.29               | 328.65                 | <b>E</b> | <b>543.31</b> | 272.16                | 526.29               | 263.65                 | <b>525.30</b>        | 263.16                 | <b>5</b>  |
| <b>8</b>  | 731.32        | 366.16                | 713.31               | 357.16                 | <b>G</b> | <b>414.27</b> | 207.64                | 397.24               | <b>199.13</b>          |                      |                        | <b>4</b>  |
| <b>9</b>  | 828.37        | 414.69                | 810.36               | 405.69                 | <b>P</b> | <b>357.25</b> | 179.13                | 340.22               | 170.62                 |                      |                        | <b>3</b>  |
| <b>10</b> | 941.46        | 471.23                | 923.45               | 462.23                 | <b>I</b> | 260.20        | 130.60                | 243.17               | 122.09                 |                      |                        | <b>2</b>  |
| <b>11</b> |               |                       |                      |                        | <b>K</b> | 147.11        | 74.06                 | 130.09               | 65.55                  |                      |                        | <b>1</b>  |

MS/MS Fragmentation of ID652 **LGIANPDFEDEK**

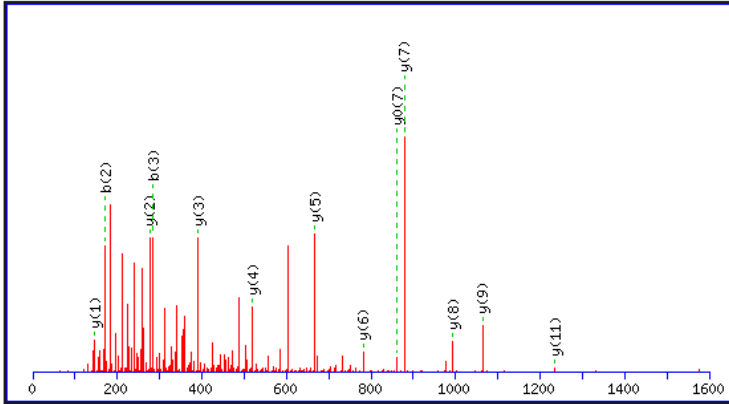

| #  | b             | b <sup>++</sup> | b*      | b <sup>*++</sup> | b <sup>0</sup> | b <sup>0++</sup> | Seq. | y              | y <sup>++</sup> | y*      | y <sup>*++</sup> | y <sup>0</sup> | y <sup>0++</sup> | #  |
|----|---------------|-----------------|---------|------------------|----------------|------------------|------|----------------|-----------------|---------|------------------|----------------|------------------|----|
| 1  | 114.09        | 57.55           |         |                  |                |                  | L    |                |                 |         |                  |                |                  | 12 |
| 2  | <b>171.11</b> | 86.06           |         |                  |                |                  | G    | <b>1234.56</b> | 617.78          | 1217.53 | 609.27           | 1216.55        | 608.78           | 11 |
| 3  | <b>284.20</b> | 142.60          |         |                  |                |                  | I    | 1177.54        | 589.27          | 1160.51 | 580.76           | 1159.53        | 580.27           | 10 |
| 4  | 355.23        | 178.12          |         |                  |                |                  | A    | <b>1064.45</b> | 532.73          | 1047.43 | 524.22           | 1046.44        | 523.72           | 9  |
| 5  | 469.28        | 235.14          | 452.25  | 226.63           |                |                  | N    | <b>993.42</b>  | 497.21          | 976.39  | 488.70           | 975.41         | 488.21           | 8  |
| 6  | 566.33        | 283.67          | 549.30  | 275.16           |                |                  | P    | <b>879.37</b>  | 440.19          | 862.35  | 431.68           | <b>861.36</b>  | 431.18           | 7  |
| 7  | 681.36        | 341.18          | 664.33  | 332.67           | 663.35         | 332.18           | D    | <b>782.32</b>  | 391.66          | 765.29  | 383.15           | 764.31         | 382.66           | 6  |
| 8  | 828.43        | 414.72          | 811.40  | 406.20           | 810.41         | 405.71           | F    | <b>667.29</b>  | 334.15          | 650.27  | 325.64           | 649.28         | 325.15           | 5  |
| 9  | 957.47        | 479.24          | 940.44  | 470.72           | 939.46         | 470.23           | E    | <b>520.22</b>  | 260.62          | 503.20  | 252.10           | 502.21         | 251.61           | 4  |
| 10 | 1072.49       | 536.75          | 1055.47 | 528.24           | 1054.48        | 527.75           | D    | <b>391.18</b>  | 196.09          | 374.16  | 187.58           | 373.17         | 187.09           | 3  |
| 11 | 1201.54       | 601.27          | 1184.51 | 592.76           | 1183.53        | 592.27           | E    | <b>276.16</b>  | 138.58          | 259.13  | 130.07           | 258.14         | 129.58           | 2  |
| 12 |               |                 |         |                  |                |                  | K    | <b>147.11</b>  | 74.06           | 130.09  | 65.55            |                |                  | 1  |

MS/MS Fragmentation of ID653 **LGIANPDFEDEK**



| #         | b             | b <sup>++</sup> | b <sup>*</sup> | b <sup>*++</sup> | b <sup>0</sup> | b <sup>0++</sup> | Seq.     | y              | y <sup>++</sup> | y <sup>*</sup> | y <sup>*++</sup> | y <sup>0</sup> | y <sup>0++</sup> | #         |
|-----------|---------------|-----------------|----------------|------------------|----------------|------------------|----------|----------------|-----------------|----------------|------------------|----------------|------------------|-----------|
| <b>1</b>  | 114.09        | 57.55           |                |                  |                |                  | <b>L</b> |                |                 |                |                  |                |                  | <b>12</b> |
| <b>2</b>  | <b>171.11</b> | 86.06           |                |                  |                |                  | <b>G</b> | <b>1234.56</b> | 617.78          | 1217.53        | 609.27           | 1216.55        | 608.78           | <b>11</b> |
| <b>3</b>  | <b>284.20</b> | 142.60          |                |                  |                |                  | <b>I</b> | 1177.54        | 589.27          | 1160.51        | 580.76           | 1159.53        | 580.27           | <b>10</b> |
| <b>4</b>  | 355.23        | 178.12          |                |                  |                |                  | <b>A</b> | <b>1064.45</b> | 532.73          | 1047.43        | 524.22           | 1046.44        | 523.72           | <b>9</b>  |
| <b>5</b>  | 469.28        | 235.14          | 452.25         | 226.63           |                |                  | <b>N</b> | <b>993.42</b>  | 497.21          | 976.39         | 488.70           | 975.41         | 488.21           | <b>8</b>  |
| <b>6</b>  | 566.33        | 283.67          | 549.30         | 275.16           |                |                  | <b>P</b> | <b>879.37</b>  | 440.19          | 862.35         | 431.68           | <b>861.36</b>  | 431.18           | <b>7</b>  |
| <b>7</b>  | 681.36        | 341.18          | 664.33         | 332.67           | 663.35         | 332.18           | <b>D</b> | <b>782.32</b>  | 391.66          | 765.29         | 383.15           | 764.31         | 382.66           | <b>6</b>  |
| <b>8</b>  | 828.43        | 414.72          | 811.40         | 406.20           | 810.41         | 405.71           | <b>F</b> | <b>667.29</b>  | 334.15          | 650.27         | 325.64           | 649.28         | 325.15           | <b>5</b>  |
| <b>9</b>  | 957.47        | 479.24          | 940.44         | 470.72           | 939.46         | 470.23           | <b>E</b> | <b>520.22</b>  | 260.62          | 503.20         | 252.10           | 502.21         | 251.61           | <b>4</b>  |
| <b>10</b> | 1072.49       | 536.75          | 1055.47        | 528.24           | 1054.48        | 527.75           | <b>D</b> | <b>391.18</b>  | 196.09          | 374.16         | 187.58           | 373.17         | 187.09           | <b>3</b>  |
| <b>11</b> | 1201.54       | 601.27          | 1184.51        | 592.76           | 1183.53        | 592.27           | <b>E</b> | <b>276.16</b>  | 138.58          | 259.13         | 130.07           | 258.14         | 129.58           | <b>2</b>  |
| <b>12</b> |               |                 |                |                  |                |                  | <b>K</b> | <b>147.11</b>  | 74.06           | 130.09         | 65.55            |                |                  | <b>1</b>  |

MS/MS Fragmentation of ID654 **SLGADEVLDYK**

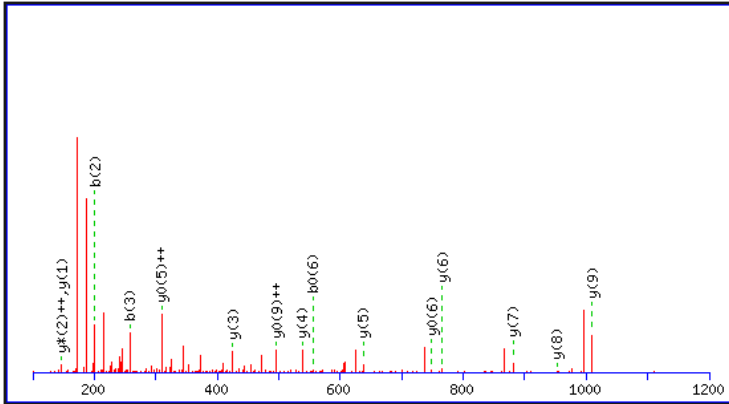

| #         | <b>b</b>      | <b>b<sup>++</sup></b> | <b>b<sup>0</sup></b> | <b>b<sup>0++</sup></b> | Seq.     | <b>y</b>       | <b>y<sup>++</sup></b> | <b>y<sup>*</sup></b> | <b>y<sup>*++</sup></b> | <b>y<sup>0</sup></b> | <b>y<sup>0++</sup></b> | #         |
|-----------|---------------|-----------------------|----------------------|------------------------|----------|----------------|-----------------------|----------------------|------------------------|----------------------|------------------------|-----------|
| <b>1</b>  | 88.04         | 44.52                 | 70.03                | 35.52                  | <b>S</b> |                |                       |                      |                        |                      |                        | <b>11</b> |
| <b>2</b>  | <b>201.12</b> | 101.07                | 183.11               | 92.06                  | <b>L</b> | 1122.57        | 561.79                | 1105.54              | 553.27                 | 1104.56              | 552.78                 | <b>10</b> |
| <b>3</b>  | <b>258.14</b> | 129.58                | 240.13               | 120.57                 | <b>G</b> | <b>1009.48</b> | 505.25                | 992.46               | 496.73                 | 991.47               | <b>496.24</b>          | <b>9</b>  |
| <b>4</b>  | 329.18        | 165.09                | 311.17               | 156.09                 | <b>A</b> | <b>952.46</b>  | 476.73                | 935.44               | 468.22                 | 934.45               | 467.73                 | <b>8</b>  |
| <b>5</b>  | 444.21        | 222.61                | 426.20               | 213.60                 | <b>D</b> | <b>881.43</b>  | 441.22                | 864.40               | 432.70                 | 863.41               | 432.21                 | <b>7</b>  |
| <b>6</b>  | 573.25        | 287.13                | <b>555.24</b>        | 278.12                 | <b>E</b> | <b>766.40</b>  | 383.70                | 749.37               | 375.19                 | <b>748.39</b>        | 374.70                 | <b>6</b>  |
| <b>7</b>  | 672.32        | 336.66                | 654.31               | 327.66                 | <b>V</b> | <b>637.36</b>  | 319.18                | 620.33               | 310.67                 | 619.34               | <b>310.18</b>          | <b>5</b>  |
| <b>8</b>  | 785.40        | 393.21                | 767.39               | 384.20                 | <b>L</b> | <b>538.29</b>  | 269.65                | 521.26               | 261.13                 | 520.28               | 260.64                 | <b>4</b>  |
| <b>9</b>  | 900.43        | 450.72                | 882.42               | 441.71                 | <b>D</b> | <b>425.20</b>  | 213.11                | 408.18               | 204.59                 | 407.19               | 204.10                 | <b>3</b>  |
| <b>10</b> | 1063.49       | 532.25                | 1045.48              | 523.25                 | <b>Y</b> | <b>310.18</b>  | 155.59                | 293.15               | <b>147.08</b>          |                      |                        | <b>2</b>  |
| <b>11</b> |               |                       |                      |                        | <b>K</b> | <b>147.11</b>  | 74.06                 | 130.09               | 65.55                  |                      |                        | <b>1</b>  |

MS/MS Fragmentation of ID657 **VIEIFEAATAEIK**

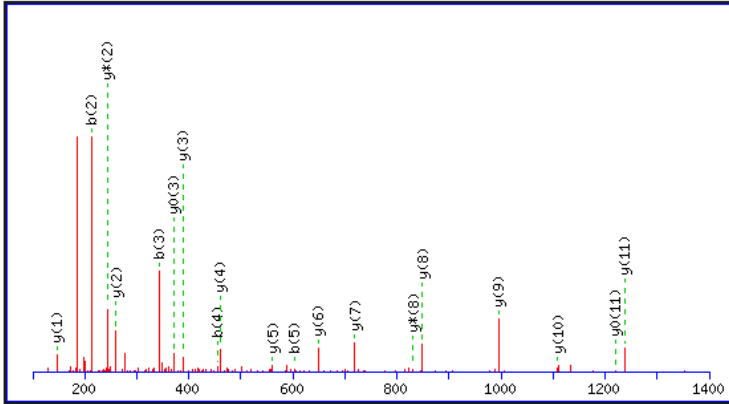

| #         | <b>b</b>      | <b>b<sup>++</sup></b> | <b>b<sup>0</sup></b> | <b>b<sup>0++</sup></b> | Seq.     | <b>y</b>       | <b>y<sup>++</sup></b> | <b>y<sup>*</sup></b> | <b>y<sup>*++</sup></b> | <b>y<sup>0</sup></b> | <b>y<sup>0++</sup></b> | #         |
|-----------|---------------|-----------------------|----------------------|------------------------|----------|----------------|-----------------------|----------------------|------------------------|----------------------|------------------------|-----------|
| <b>1</b>  | 100.08        | 50.54                 |                      |                        | <b>V</b> |                |                       |                      |                        |                      |                        | <b>13</b> |
| <b>2</b>  | <b>213.16</b> | 107.08                |                      |                        | <b>I</b> | 1350.72        | 675.86                | 1333.69              | 667.35                 | 1332.70              | 666.86                 | <b>12</b> |
| <b>3</b>  | <b>342.20</b> | 171.60                | 324.19               | 162.60                 | <b>E</b> | <b>1237.63</b> | 619.32                | 1220.60              | 610.81                 | <b>1219.62</b>       | 610.31                 | <b>11</b> |
| <b>4</b>  | <b>455.29</b> | 228.15                | 437.28               | 219.14                 | <b>I</b> | <b>1108.59</b> | 554.80                | 1091.56              | 546.28                 | 1090.58              | 545.79                 | <b>10</b> |
| <b>5</b>  | <b>602.35</b> | 301.68                | 584.34               | 292.68                 | <b>F</b> | <b>995.50</b>  | 498.26                | 978.48               | 489.74                 | 977.49               | 489.25                 | <b>9</b>  |
| <b>6</b>  | 731.40        | 366.20                | 713.39               | 357.20                 | <b>E</b> | <b>848.44</b>  | 424.72                | <b>831.41</b>        | 416.21                 | 830.43               | 415.72                 | <b>8</b>  |
| <b>7</b>  | 802.43        | 401.72                | 784.42               | 392.72                 | <b>A</b> | <b>719.39</b>  | 360.20                | 702.37               | 351.69                 | 701.38               | 351.20                 | <b>7</b>  |
| <b>8</b>  | 889.47        | 445.24                | 871.46               | 436.23                 | <b>S</b> | <b>648.36</b>  | 324.68                | 631.33               | 316.17                 | 630.35               | 315.68                 | <b>6</b>  |
| <b>9</b>  | 990.51        | 495.76                | 972.50               | 486.76                 | <b>T</b> | <b>561.32</b>  | 281.17                | 544.30               | 272.65                 | 543.31               | 272.16                 | <b>5</b>  |
| <b>10</b> | 1061.55       | 531.28                | 1043.54              | 522.27                 | <b>A</b> | <b>460.28</b>  | 230.64                | 443.25               | 222.13                 | 442.27               | 221.64                 | <b>4</b>  |
| <b>11</b> | 1190.59       | 595.80                | 1172.58              | 586.80                 | <b>E</b> | <b>389.24</b>  | 195.12                | 372.21               | 186.61                 | <b>371.23</b>        | 186.12                 | <b>3</b>  |
| <b>12</b> | 1303.68       | 652.34                | 1285.67              | 643.34                 | <b>I</b> | <b>260.20</b>  | 130.60                | <b>243.17</b>        | 122.09                 |                      |                        | <b>2</b>  |
| <b>13</b> |               |                       |                      |                        | <b>K</b> | <b>147.11</b>  | 74.06                 | 130.09               | 65.55                  |                      |                        | <b>1</b>  |

MS/MS Fragmentation of ID663 **NLGADSFVSR**

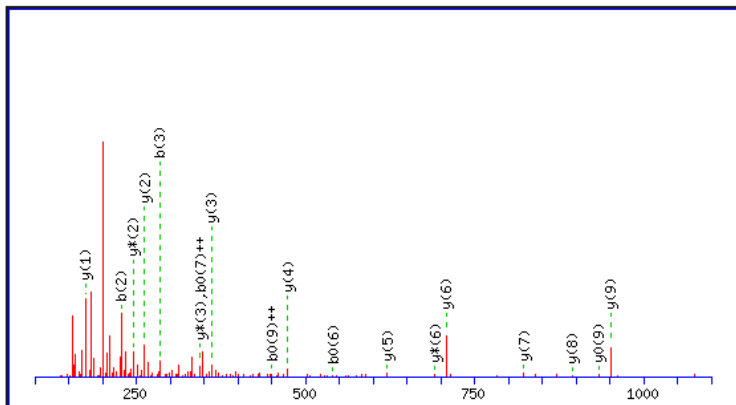

| #         | <b>b</b>      | <b>b<sup>++</sup></b> | <b>b<sup>*</sup></b> | <b>b<sup>*++</sup></b> | <b>b<sup>0</sup></b> | <b>b<sup>0++</sup></b> | Seq.     | <b>y</b>      | <b>y<sup>++</sup></b> | <b>y<sup>*</sup></b> | <b>y<sup>*++</sup></b> | <b>y<sup>0</sup></b> | <b>y<sup>0++</sup></b> | #         |
|-----------|---------------|-----------------------|----------------------|------------------------|----------------------|------------------------|----------|---------------|-----------------------|----------------------|------------------------|----------------------|------------------------|-----------|
| <b>1</b>  | 115.05        | 58.03                 | 98.02                | 49.52                  |                      |                        | <b>N</b> |               |                       |                      |                        |                      |                        | <b>11</b> |
| <b>2</b>  | <b>228.13</b> | 114.57                | 211.11               | 106.06                 |                      |                        | <b>L</b> | 1064.57       | 532.79                | 1047.55              | 524.28                 | 1046.56              | 523.79                 | <b>10</b> |
| <b>3</b>  | <b>285.16</b> | 143.08                | 268.13               | 134.57                 |                      |                        | <b>G</b> | <b>951.49</b> | 476.25                | 934.46               | 467.74                 | <b>933.48</b>        | 467.24                 | <b>9</b>  |
| <b>4</b>  | 356.19        | 178.60                | 339.17               | 170.09                 |                      |                        | <b>A</b> | <b>894.47</b> | 447.74                | 877.44               | 439.22                 | 876.46               | 438.73                 | <b>8</b>  |
| <b>5</b>  | 471.22        | 236.11                | 454.19               | 227.60                 | 453.21               | 227.11                 | <b>D</b> | <b>823.43</b> | 412.22                | 806.40               | 403.71                 | 805.42               | 403.21                 | <b>7</b>  |
| <b>6</b>  | 558.25        | 279.63                | 541.23               | 271.12                 | <b>540.24</b>        | 270.62                 | <b>S</b> | <b>708.40</b> | 354.71                | <b>691.38</b>        | 346.19                 | 690.39               | 345.70                 | <b>6</b>  |
| <b>7</b>  | 705.32        | 353.16                | 688.29               | 344.65                 | 687.31               | <b>344.16</b>          | <b>F</b> | <b>621.37</b> | 311.19                | 604.35               | 302.68                 | 603.36               | 302.18                 | <b>5</b>  |
| <b>8</b>  | 818.40        | 409.71                | 801.38               | 401.19                 | 800.39               | 400.70                 | <b>L</b> | <b>474.30</b> | 237.66                | 457.28               | 229.14                 | 456.29               | 228.65                 | <b>4</b>  |
| <b>9</b>  | 917.47        | 459.24                | 900.45               | 450.73                 | 899.46               | <b>450.23</b>          | <b>V</b> | <b>361.22</b> | 181.11                | <b>344.19</b>        | 172.60                 | 343.21               | 172.11                 | <b>3</b>  |
| <b>10</b> | 1004.50       | 502.76                | 987.48               | 494.24                 | 986.49               | 493.75                 | <b>S</b> | <b>262.15</b> | 131.58                | <b>245.12</b>        | 123.07                 | 244.14               | 122.57                 | <b>2</b>  |
| <b>11</b> |               |                       |                      |                        |                      |                        | <b>R</b> | <b>175.12</b> | 88.06                 | 158.09               | 79.55                  |                      |                        | <b>1</b>  |



MS/MS Fragmentation of ID664 **KAPAGYVR**

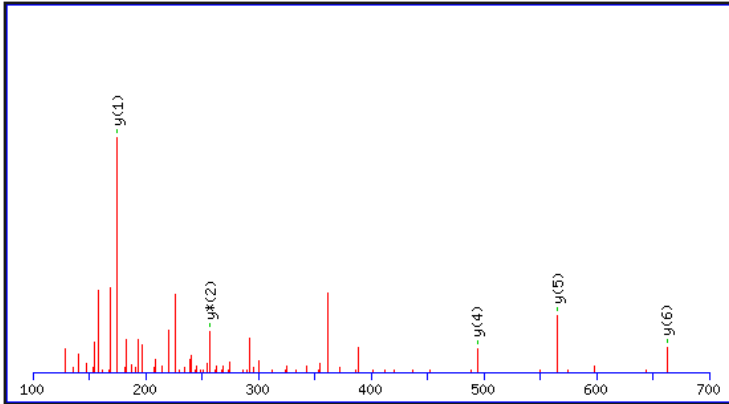

| #        | <b>b</b> | <b>b<sup>++</sup></b> | <b>b<sup>*</sup></b> | <b>b<sup>*++</sup></b> | <b>Seq.</b> | <b>y</b>      | <b>y<sup>++</sup></b> | <b>y<sup>*</sup></b> | <b>y<sup>*++</sup></b> | #        |
|----------|----------|-----------------------|----------------------|------------------------|-------------|---------------|-----------------------|----------------------|------------------------|----------|
| <b>1</b> | 129.10   | 65.05                 | 112.08               | 56.54                  | <b>K</b>    |               |                       |                      |                        | <b>8</b> |
| <b>2</b> | 200.14   | 100.57                | 183.11               | 92.06                  | <b>A</b>    | 733.40        | 367.20                | 716.37               | 358.69                 | <b>7</b> |
| <b>3</b> | 297.19   | 149.10                | 280.17               | 140.59                 | <b>P</b>    | <b>662.36</b> | 331.68                | 645.34               | 323.17                 | <b>6</b> |
| <b>4</b> | 368.23   | 184.62                | 351.20               | 176.10                 | <b>A</b>    | <b>565.31</b> | 283.16                | 548.28               | 274.64                 | <b>5</b> |
| <b>5</b> | 425.25   | 213.13                | 408.22               | 204.62                 | <b>G</b>    | <b>494.27</b> | 247.64                | 477.25               | 239.13                 | <b>4</b> |
| <b>6</b> | 588.31   | 294.66                | 571.29               | 286.15                 | <b>Y</b>    | 437.25        | 219.13                | 420.22               | 210.62                 | <b>3</b> |
| <b>7</b> | 687.38   | 344.19                | 670.36               | 335.68                 | <b>V</b>    | 274.19        | 137.60                | <b>257.16</b>        | 129.08                 | <b>2</b> |
| <b>8</b> |          |                       |                      |                        | <b>R</b>    | <b>175.12</b> | 88.06                 | 158.09               | 79.55                  | <b>1</b> |

MS/MS Fragmentation of ID669 **ALSGYNQSFSLR**

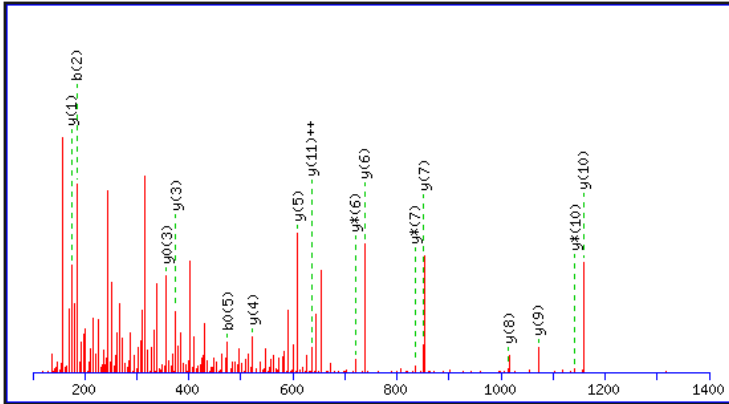

| #  | b             | b <sup>++</sup> | b <sup>*</sup> | b <sup>*++</sup> | b <sup>0</sup> | b <sup>0++</sup> | Seq. | y              | y <sup>++</sup> | y <sup>*</sup> | y <sup>*++</sup> | y <sup>0</sup> | y <sup>0++</sup> | #  |
|----|---------------|-----------------|----------------|------------------|----------------|------------------|------|----------------|-----------------|----------------|------------------|----------------|------------------|----|
| 1  | 72.04         | 36.53           |                |                  |                |                  | A    |                |                 |                |                  |                |                  | 12 |
| 2  | <b>185.13</b> | 93.07           |                |                  |                |                  | L    | 1271.64        | <b>636.32</b>   | 1254.61        | 627.81           | 1253.63        | 627.32           | 11 |
| 3  | 272.16        | 136.58          |                |                  | 254.15         | 127.58           | S    | <b>1158.55</b> | 579.78          | <b>1141.53</b> | 571.27           | 1140.54        | 570.78           | 10 |
| 4  | 329.18        | 165.09          |                |                  | 311.17         | 156.09           | G    | <b>1071.52</b> | 536.26          | 1054.50        | 527.75           | 1053.51        | 527.26           | 9  |
| 5  | 492.25        | 246.63          |                |                  | <b>474.23</b>  | 237.62           | Y    | <b>1014.50</b> | 507.75          | 997.47         | 499.24           | 996.49         | 498.75           | 8  |
| 6  | 606.29        | 303.65          | 589.26         | 295.13           | 588.28         | 294.64           | N    | <b>851.44</b>  | 426.22          | <b>834.41</b>  | 417.71           | 833.43         | 417.22           | 7  |
| 7  | 734.35        | 367.68          | 717.32         | 359.16           | 716.34         | 358.67           | Q    | <b>737.39</b>  | 369.20          | <b>720.37</b>  | 360.69           | 719.38         | 360.20           | 6  |
| 8  | 821.38        | 411.19          | 804.35         | 402.68           | 803.37         | 402.19           | S    | <b>609.34</b>  | 305.17          | 592.31         | 296.66           | 591.32         | 296.17           | 5  |
| 9  | 968.45        | 484.73          | 951.42         | 476.21           | 950.44         | 475.72           | F    | <b>522.30</b>  | 261.66          | 505.28         | 253.14           | 504.29         | 252.65           | 4  |
| 10 | 1055.48       | 528.24          | 1038.45        | 519.73           | 1037.47        | 519.24           | S    | <b>375.24</b>  | 188.12          | 358.21         | 179.61           | <b>357.22</b>  | 179.12           | 3  |
| 11 | 1168.56       | 584.79          | 1151.54        | 576.27           | 1150.55        | 575.78           | L    | 288.20         | 144.61          | 271.18         | 136.09           |                |                  | 2  |
| 12 |               |                 |                |                  |                |                  | R    | <b>175.12</b>  | 88.06           | 158.09         | 79.55            |                |                  | 1  |

MS/MS Fragmentation of ID671 **SISSGFGVLLK**

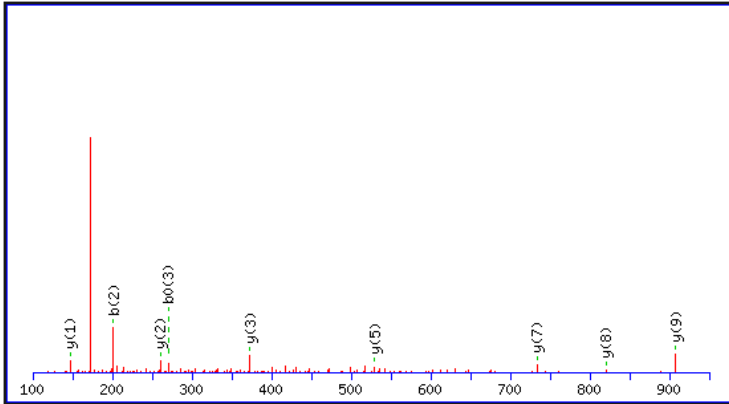

| #         | <b>b</b>      | <b>b<sup>++</sup></b> | <b>b<sup>0</sup></b> | <b>b<sup>0++</sup></b> | Seq.     | <b>y</b>      | <b>y<sup>++</sup></b> | <b>y<sup>*</sup></b> | <b>y<sup>*++</sup></b> | <b>y<sup>0</sup></b> | <b>y<sup>0++</sup></b> | #         |
|-----------|---------------|-----------------------|----------------------|------------------------|----------|---------------|-----------------------|----------------------|------------------------|----------------------|------------------------|-----------|
| <b>1</b>  | 88.04         | 44.52                 | 70.03                | 35.52                  | <b>S</b> |               |                       |                      |                        |                      |                        | <b>11</b> |
| <b>2</b>  | <b>201.12</b> | 101.07                | 183.11               | 92.06                  | <b>I</b> | 1020.61       | 510.81                | 1003.58              | 502.29                 | 1002.60              | 501.80                 | <b>10</b> |
| <b>3</b>  | 288.16        | 144.58                | <b>270.14</b>        | 135.58                 | <b>S</b> | <b>907.52</b> | 454.27                | 890.50               | 445.75                 | 889.51               | 445.26                 | <b>9</b>  |
| <b>4</b>  | 375.19        | 188.10                | 357.18               | 179.09                 | <b>S</b> | <b>820.49</b> | 410.75                | 803.47               | 402.24                 | 802.48               | 401.74                 | <b>8</b>  |
| <b>5</b>  | 432.21        | 216.61                | 414.20               | 207.60                 | <b>G</b> | <b>733.46</b> | 367.23                | 716.43               | 358.72                 |                      |                        | <b>7</b>  |
| <b>6</b>  | 579.28        | 290.14                | 561.27               | 281.14                 | <b>F</b> | 676.44        | 338.72                | 659.41               | 330.21                 |                      |                        | <b>6</b>  |
| <b>7</b>  | 636.30        | 318.65                | 618.29               | 309.65                 | <b>G</b> | <b>529.37</b> | 265.19                | 512.34               | 256.68                 |                      |                        | <b>5</b>  |
| <b>8</b>  | 735.37        | 368.19                | 717.36               | 359.18                 | <b>V</b> | 472.35        | 236.68                | 455.32               | 228.17                 |                      |                        | <b>4</b>  |
| <b>9</b>  | 848.45        | 424.73                | 830.44               | 415.72                 | <b>L</b> | <b>373.28</b> | 187.14                | 356.25               | 178.63                 |                      |                        | <b>3</b>  |
| <b>10</b> | 961.54        | 481.27                | 943.52               | 472.27                 | <b>L</b> | <b>260.20</b> | 130.60                | 243.17               | 122.09                 |                      |                        | <b>2</b>  |
| <b>11</b> |               |                       |                      |                        | <b>K</b> | <b>147.11</b> | 74.06                 | 130.09               | 65.55                  |                      |                        | <b>1</b>  |

MS/MS Fragmentation of ID672 **NYFFISGK**

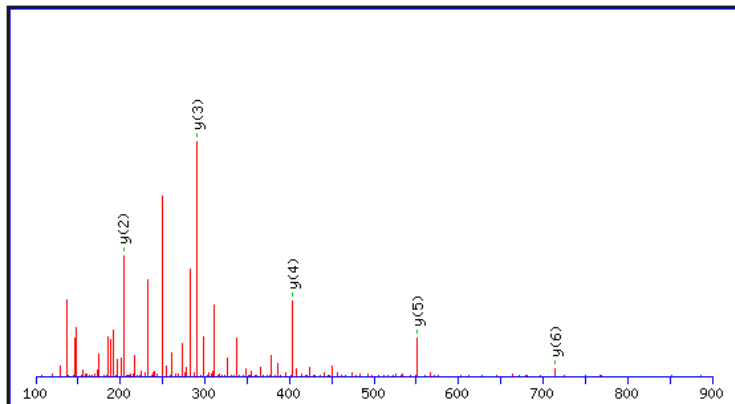

| #        | <b>b</b> | <b>b<sup>++</sup></b> | <b>b<sup>*</sup></b> | <b>b<sup>*++</sup></b> | <b>b<sup>0</sup></b> | <b>b<sup>0++</sup></b> | Seq.     | <b>y</b>      | <b>y<sup>++</sup></b> | <b>y<sup>*</sup></b> | <b>y<sup>*++</sup></b> | <b>y<sup>0</sup></b> | <b>y<sup>0++</sup></b> | #        |
|----------|----------|-----------------------|----------------------|------------------------|----------------------|------------------------|----------|---------------|-----------------------|----------------------|------------------------|----------------------|------------------------|----------|
| <b>1</b> | 115.05   | 58.03                 | 98.02                | 49.52                  |                      |                        | <b>N</b> |               |                       |                      |                        |                      |                        | <b>8</b> |
| <b>2</b> | 278.11   | 139.56                | 261.09               | 131.05                 |                      |                        | <b>Y</b> | 877.45        | 439.23                | 860.42               | 430.71                 | 859.43               | 430.22                 | <b>7</b> |
| <b>3</b> | 441.18   | 221.09                | 424.15               | 212.58                 |                      |                        | <b>Y</b> | <b>714.38</b> | 357.69                | 697.36               | 349.18                 | 696.37               | 348.69                 | <b>6</b> |
| <b>4</b> | 588.25   | 294.63                | 571.22               | 286.11                 |                      |                        | <b>F</b> | <b>551.32</b> | 276.16                | 534.29               | 267.65                 | 533.31               | 267.16                 | <b>5</b> |
| <b>5</b> | 701.33   | 351.17                | 684.30               | 342.66                 |                      |                        | <b>I</b> | <b>404.25</b> | 202.63                | 387.22               | 194.12                 | 386.24               | 193.62                 | <b>4</b> |
| <b>6</b> | 788.36   | 394.68                | 771.33               | 386.17                 | 770.35               | 385.68                 | <b>S</b> | <b>291.17</b> | 146.09                | 274.14               | 137.57                 | 273.16               | 137.08                 | <b>3</b> |
| <b>7</b> | 845.38   | 423.20                | 828.36               | 414.68                 | 827.37               | 414.19                 | <b>G</b> | <b>204.13</b> | 102.57                | 187.11               | 94.06                  |                      |                        | <b>2</b> |
| <b>8</b> |          |                       |                      |                        |                      |                        | <b>K</b> | 147.11        | 74.06                 | 130.09               | 65.55                  |                      |                        | <b>1</b> |

MS/MS Fragmentation of ID677 **LWQVPETLPEEVLGK**

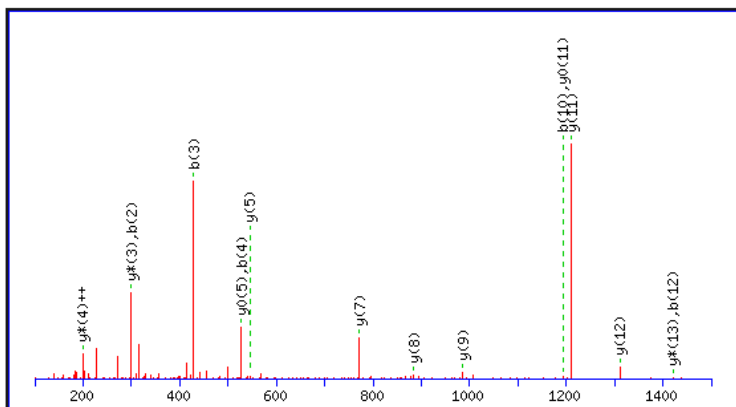

| #  | b              | b <sup>++</sup> | b <sup>*</sup> | b <sup>*++</sup> | b <sup>0</sup> | b <sup>0++</sup> | Seq. | y              | y <sup>++</sup> | y <sup>*</sup> | y <sup>*++</sup> | y <sup>0</sup> | y <sup>0++</sup> | #  |
|----|----------------|-----------------|----------------|------------------|----------------|------------------|------|----------------|-----------------|----------------|------------------|----------------|------------------|----|
| 1  | 114.09         | 57.55           |                |                  |                |                  | L    |                |                 |                |                  |                |                  | 15 |
| 2  | <b>300.17</b>  | 150.59          |                |                  |                |                  | W    | 1624.86        | 812.93          | 1607.83        | 804.42           | 1606.85        | 803.93           | 14 |
| 3  | <b>428.23</b>  | 214.62          | 411.20         | 206.10           |                |                  | Q    | 1438.78        | 719.89          | <b>1421.75</b> | 711.38           | 1420.77        | 710.89           | 13 |
| 4  | <b>527.30</b>  | 264.15          | 510.27         | 255.64           |                |                  | V    | <b>1310.72</b> | 655.86          | 1293.69        | 647.35           | 1292.71        | 646.86           | 12 |
| 5  | 624.35         | 312.68          | 607.32         | 304.17           |                |                  | P    | <b>1211.65</b> | 606.33          | 1194.63        | 597.82           | <b>1193.64</b> | 597.32           | 11 |
| 6  | 753.39         | 377.20          | 736.37         | 368.69           | 735.38         | 368.19           | E    | 1114.60        | 557.80          | 1097.57        | 549.29           | 1096.59        | 548.80           | 10 |
| 7  | 854.44         | 427.72          | 837.41         | 419.21           | 836.43         | 418.72           | T    | <b>985.56</b>  | 493.28          | 968.53         | 484.77           | 967.55         | 484.28           | 9  |
| 8  | 967.52         | 484.27          | 950.50         | 475.75           | 949.51         | 475.26           | L    | <b>884.51</b>  | 442.76          | 867.48         | 434.24           | 866.50         | 433.75           | 8  |
| 9  | 1064.58        | 532.79          | 1047.55        | 524.28           | 1046.57        | 523.79           | P    | <b>771.42</b>  | 386.22          | 754.40         | 377.70           | 753.41         | 377.21           | 7  |
| 10 | <b>1193.62</b> | 597.31          | 1176.59        | 588.80           | 1175.61        | 588.31           | E    | 674.37         | 337.69          | 657.35         | 329.18           | 656.36         | 328.68           | 6  |
| 11 | 1322.66        | 661.83          | 1305.64        | 653.32           | 1304.65        | 652.83           | E    | <b>545.33</b>  | 273.17          | 528.30         | 264.66           | <b>527.32</b>  | 264.16           | 5  |
| 12 | <b>1421.73</b> | 711.37          | 1404.70        | 702.86           | 1403.72        | 702.36           | V    | 416.29         | 208.65          | 399.26         | <b>200.13</b>    |                |                  | 4  |
| 13 | 1534.82        | 767.91          | 1517.79        | 759.40           | 1516.80        | 758.91           | L    | 317.22         | 159.11          | <b>300.19</b>  | 150.60           |                |                  | 3  |
| 14 | 1591.84        | 796.42          | 1574.81        | 787.91           | 1573.83        | 787.42           | G    | 204.13         | 102.57          | 187.11         | 94.06            |                |                  | 2  |
| 15 |                |                 |                |                  |                |                  | K    | 147.11         | 74.06           | 130.09         | 65.55            |                |                  | 1  |

MS/MS Fragmentation of ID684 **GLASMIEVIK**

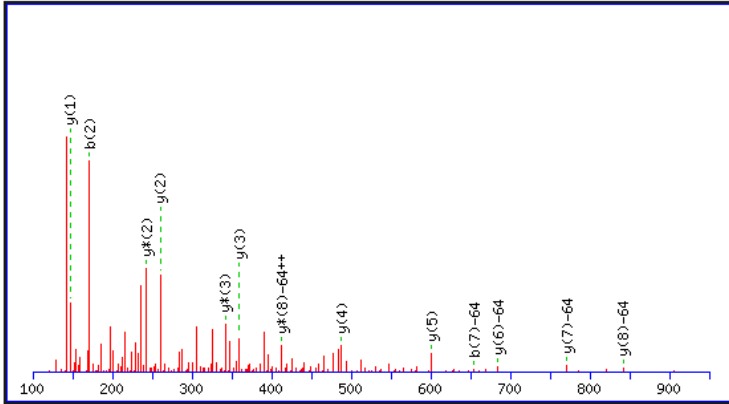

| #         | <b>b</b>      | <b>b<sup>++</sup></b> | <b>b<sup>0</sup></b> | <b>b<sup>0++</sup></b> | Seq.     | <b>y</b>      | <b>y<sup>++</sup></b> | <b>y<sup>*</sup></b> | <b>y<sup>*++</sup></b> | <b>y<sup>0</sup></b> | <b>y<sup>0++</sup></b> | #         |
|-----------|---------------|-----------------------|----------------------|------------------------|----------|---------------|-----------------------|----------------------|------------------------|----------------------|------------------------|-----------|
| <b>1</b>  | 58.03         | 29.52                 |                      |                        | <b>G</b> |               |                       |                      |                        |                      |                        | <b>10</b> |
| <b>2</b>  | <b>171.11</b> | 86.06                 |                      |                        | <b>L</b> | 955.58        | 478.29                | 938.56               | 469.78                 | 937.57               | 469.29                 | <b>9</b>  |
| <b>3</b>  | 242.15        | 121.58                |                      |                        | <b>A</b> | <b>842.50</b> | 421.75                | 825.47               | <b>413.24</b>          | 824.49               | 412.75                 | <b>8</b>  |
| <b>4</b>  | 329.18        | 165.09                | 311.17               | 156.09                 | <b>S</b> | <b>771.46</b> | 386.23                | 754.43               | 377.72                 | 753.45               | 377.23                 | <b>7</b>  |
| <b>5</b>  | 412.22        | 206.61                | 394.21               | 197.61                 | <b>M</b> | <b>684.43</b> | 342.72                | 667.40               | 334.20                 | 666.42               | 333.71                 | <b>6</b>  |
| <b>6</b>  | 525.30        | 263.16                | 507.29               | 254.15                 | <b>I</b> | <b>601.39</b> | 301.20                | 584.37               | 292.69                 | 583.38               | 292.19                 | <b>5</b>  |
| <b>7</b>  | <b>654.35</b> | 327.68                | 636.34               | 318.67                 | <b>E</b> | <b>488.31</b> | 244.66                | 471.28               | 236.14                 | 470.30               | 235.65                 | <b>4</b>  |
| <b>8</b>  | 753.41        | 377.21                | 735.40               | 368.21                 | <b>V</b> | <b>359.27</b> | 180.14                | <b>342.24</b>        | 171.62                 |                      |                        | <b>3</b>  |
| <b>9</b>  | 866.50        | 433.75                | 848.49               | 424.75                 | <b>I</b> | <b>260.20</b> | 130.60                | <b>243.17</b>        | 122.09                 |                      |                        | <b>2</b>  |
| <b>10</b> |               |                       |                      |                        | <b>K</b> | <b>147.11</b> | 74.06                 | 130.09               | 65.55                  |                      |                        | <b>1</b>  |

MS/MS Fragmentation of ID694 **LFLGNIQASR**

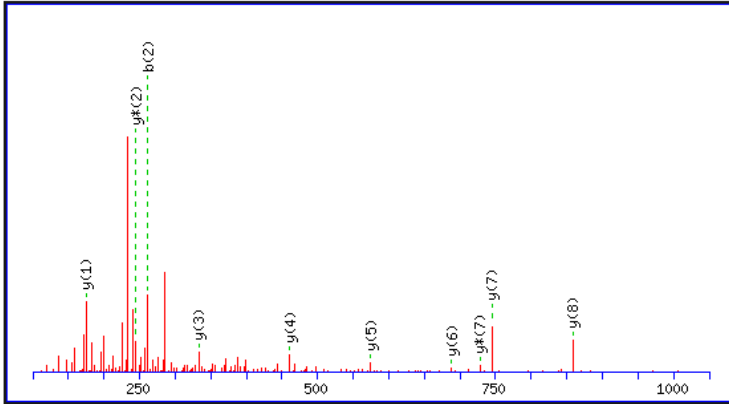

| #         | <b>b</b>      | <b>b<sup>++</sup></b> | <b>b<sup>*</sup></b> | <b>b<sup>*++</sup></b> | <b>b<sup>0</sup></b> | <b>b<sup>0++</sup></b> | Seq.     | <b>y</b>      | <b>y<sup>++</sup></b> | <b>y<sup>*</sup></b> | <b>y<sup>*++</sup></b> | <b>y<sup>0</sup></b> | <b>y<sup>0++</sup></b> | #         |
|-----------|---------------|-----------------------|----------------------|------------------------|----------------------|------------------------|----------|---------------|-----------------------|----------------------|------------------------|----------------------|------------------------|-----------|
| <b>1</b>  | 114.09        | 57.55                 |                      |                        |                      |                        | <b>L</b> |               |                       |                      |                        |                      |                        | <b>10</b> |
| <b>2</b>  | <b>261.16</b> | 131.08                |                      |                        |                      |                        | <b>F</b> | 1005.55       | 503.28                | 988.52               | 494.76                 | 987.54               | 494.27                 | <b>9</b>  |
| <b>3</b>  | 374.24        | 187.63                |                      |                        |                      |                        | <b>L</b> | <b>858.48</b> | 429.74                | 841.45               | 421.23                 | 840.47               | 420.74                 | <b>8</b>  |
| <b>4</b>  | 431.27        | 216.14                |                      |                        |                      |                        | <b>G</b> | <b>745.40</b> | 373.20                | <b>728.37</b>        | 364.69                 | 727.38               | 364.20                 | <b>7</b>  |
| <b>5</b>  | 545.31        | 273.16                | 528.28               | 264.64                 |                      |                        | <b>N</b> | <b>688.37</b> | 344.69                | 671.35               | 336.18                 | 670.36               | 335.69                 | <b>6</b>  |
| <b>6</b>  | 658.39        | 329.70                | 641.37               | 321.19                 |                      |                        | <b>L</b> | <b>574.33</b> | 287.67                | 557.30               | 279.16                 | 556.32               | 278.66                 | <b>5</b>  |
| <b>7</b>  | 786.45        | 393.73                | 769.42               | 385.22                 |                      |                        | <b>Q</b> | <b>461.25</b> | 231.13                | 444.22               | 222.61                 | 443.24               | 222.12                 | <b>4</b>  |
| <b>8</b>  | 857.49        | 429.25                | 840.46               | 420.73                 |                      |                        | <b>A</b> | <b>333.19</b> | 167.10                | 316.16               | 158.58                 | 315.18               | 158.09                 | <b>3</b>  |
| <b>9</b>  | 944.52        | 472.76                | 927.49               | 464.25                 | 926.51               | 463.76                 | <b>S</b> | 262.15        | 131.58                | <b>245.12</b>        | 123.07                 | 244.14               | 122.57                 | <b>2</b>  |
| <b>10</b> |               |                       |                      |                        |                      |                        | <b>R</b> | <b>175.12</b> | 88.06                 | 158.09               | 79.55                  |                      |                        | <b>1</b>  |

MS/MS Fragmentation of ID696 **AVAVLNSSEGVK**

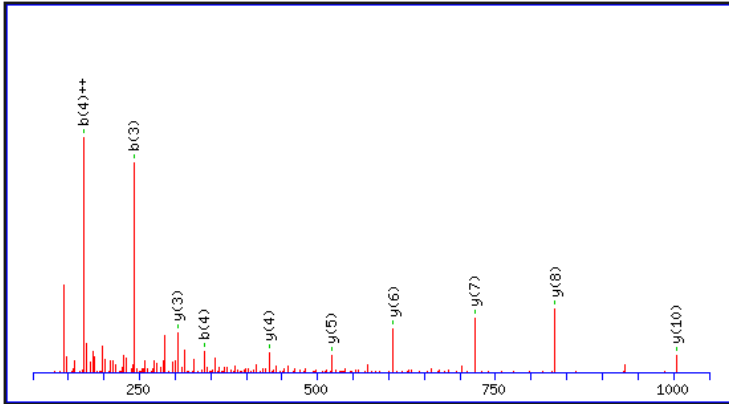

| #         | <b>b</b>      | <b>b<sup>++</sup></b> | <b>b*</b> | <b>b<sup>*++</sup></b> | <b>b<sup>0</sup></b> | <b>b<sup>0++</sup></b> | Seq.     | <b>y</b>       | <b>y<sup>++</sup></b> | <b>y*</b> | <b>y<sup>*++</sup></b> | <b>y<sup>0</sup></b> | <b>y<sup>0++</sup></b> | #         |
|-----------|---------------|-----------------------|-----------|------------------------|----------------------|------------------------|----------|----------------|-----------------------|-----------|------------------------|----------------------|------------------------|-----------|
| <b>1</b>  | 72.04         | 36.53                 |           |                        |                      |                        | <b>A</b> |                |                       |           |                        |                      |                        | <b>12</b> |
| <b>2</b>  | <b>171.11</b> | 86.06                 |           |                        |                      |                        | <b>V</b> | 1102.61        | 551.81                | 1085.58   | 543.30                 | 1084.60              | 542.80                 | <b>11</b> |
| <b>3</b>  | <b>242.15</b> | 121.58                |           |                        |                      |                        | <b>A</b> | <b>1003.54</b> | 502.27                | 986.52    | 493.76                 | 985.53               | 493.27                 | <b>10</b> |
| <b>4</b>  | <b>341.22</b> | <b>171.11</b>         |           |                        |                      |                        | <b>V</b> | 932.50         | 466.76                | 915.48    | 458.24                 | 914.49               | 457.75                 | <b>9</b>  |
| <b>5</b>  | 454.30        | 227.65                |           |                        |                      |                        | <b>L</b> | <b>833.44</b>  | 417.22                | 816.41    | 408.71                 | 815.43               | 408.22                 | <b>8</b>  |
| <b>6</b>  | 568.35        | 284.68                | 551.32    | 276.16                 |                      |                        | <b>N</b> | <b>720.35</b>  | 360.68                | 703.33    | 352.17                 | 702.34               | 351.67                 | <b>7</b>  |
| <b>7</b>  | 655.38        | 328.19                | 638.35    | 319.68                 | 637.37               | 319.19                 | <b>S</b> | <b>606.31</b>  | 303.66                | 589.28    | 295.15                 | 588.30               | 294.65                 | <b>6</b>  |
| <b>8</b>  | 742.41        | 371.71                | 725.38    | 363.20                 | 724.40               | 362.70                 | <b>S</b> | <b>519.28</b>  | 260.14                | 502.25    | 251.63                 | 501.27               | 251.14                 | <b>5</b>  |
| <b>9</b>  | 871.45        | 436.23                | 854.43    | 427.72                 | 853.44               | 427.22                 | <b>E</b> | <b>432.25</b>  | 216.63                | 415.22    | 208.11                 | 414.23               | 207.62                 | <b>4</b>  |
| <b>10</b> | 928.47        | 464.74                | 911.45    | 456.23                 | 910.46               | 455.74                 | <b>G</b> | <b>303.20</b>  | 152.10                | 286.18    | 143.59                 |                      |                        | <b>3</b>  |
| <b>11</b> | 1027.54       | 514.27                | 1010.52   | 505.76                 | 1009.53              | 505.27                 | <b>V</b> | 246.18         | 123.59                | 229.15    | 115.08                 |                      |                        | <b>2</b>  |
| <b>12</b> |               |                       |           |                        |                      |                        | <b>K</b> | 147.11         | 74.06                 | 130.09    | 65.55                  |                      |                        | <b>1</b>  |



MS/MS Fragmentation of ID703 **VSSALVEIVR**

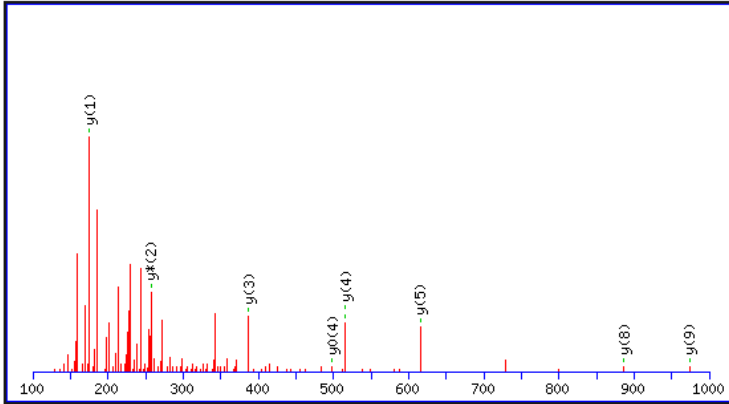

| #         | <b>b</b> | <b>b<sup>++</sup></b> | <b>b<sup>0</sup></b> | <b>b<sup>0++</sup></b> | Seq.     | <b>y</b>      | <b>y<sup>++</sup></b> | <b>y<sup>*</sup></b> | <b>y<sup>*++</sup></b> | <b>y<sup>0</sup></b> | <b>y<sup>0++</sup></b> | #         |
|-----------|----------|-----------------------|----------------------|------------------------|----------|---------------|-----------------------|----------------------|------------------------|----------------------|------------------------|-----------|
| <b>1</b>  | 100.08   | 50.54                 |                      |                        | <b>V</b> |               |                       |                      |                        |                      |                        | <b>10</b> |
| <b>2</b>  | 187.11   | 94.06                 | 169.10               | 85.05                  | <b>S</b> | <b>973.57</b> | 487.29                | 956.54               | 478.77                 | 955.56               | 478.28                 | <b>9</b>  |
| <b>3</b>  | 274.14   | 137.57                | 256.13               | 128.57                 | <b>S</b> | <b>886.54</b> | 443.77                | 869.51               | 435.26                 | 868.53               | 434.77                 | <b>8</b>  |
| <b>4</b>  | 345.18   | 173.09                | 327.17               | 164.09                 | <b>A</b> | 799.50        | 400.26                | 782.48               | 391.74                 | 781.49               | 391.25                 | <b>7</b>  |
| <b>5</b>  | 458.26   | 229.63                | 440.25               | 220.63                 | <b>L</b> | 728.47        | 364.74                | 711.44               | 356.22                 | 710.46               | 355.73                 | <b>6</b>  |
| <b>6</b>  | 557.33   | 279.17                | 539.32               | 270.16                 | <b>V</b> | <b>615.38</b> | 308.19                | 598.36               | 299.68                 | 597.37               | 299.19                 | <b>5</b>  |
| <b>7</b>  | 686.37   | 343.69                | 668.36               | 334.68                 | <b>E</b> | <b>516.31</b> | 258.66                | 499.29               | 250.15                 | <b>498.30</b>        | 249.66                 | <b>4</b>  |
| <b>8</b>  | 799.46   | 400.23                | 781.45               | 391.23                 | <b>I</b> | <b>387.27</b> | 194.14                | 370.24               | 185.63                 |                      |                        | <b>3</b>  |
| <b>9</b>  | 898.52   | 449.77                | 880.51               | 440.76                 | <b>V</b> | 274.19        | 137.60                | <b>257.16</b>        | 129.08                 |                      |                        | <b>2</b>  |
| <b>10</b> |          |                       |                      |                        | <b>R</b> | <b>175.12</b> | 88.06                 | 158.09               | 79.55                  |                      |                        | <b>1</b>  |

MS/MS Fragmentation of ID706 **SNVLAFWR**

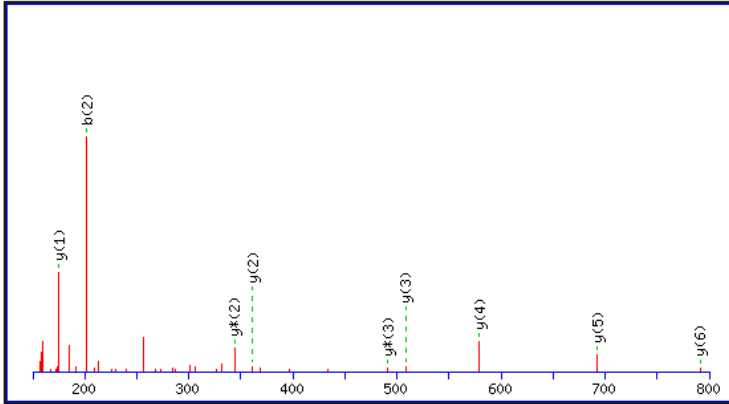

| #        | <b>b</b>      | <b>b<sup>++</sup></b> | <b>b<sup>*</sup></b> | <b>b<sup>*++</sup></b> | <b>b<sup>0</sup></b> | <b>b<sup>0++</sup></b> | Seq.     | <b>y</b>      | <b>y<sup>++</sup></b> | <b>y<sup>*</sup></b> | <b>y<sup>*++</sup></b> | #        |
|----------|---------------|-----------------------|----------------------|------------------------|----------------------|------------------------|----------|---------------|-----------------------|----------------------|------------------------|----------|
| <b>1</b> | 88.04         | 44.52                 |                      |                        | 70.03                | 35.52                  | <b>S</b> |               |                       |                      |                        | <b>8</b> |
| <b>2</b> | <b>202.08</b> | 101.54                | 185.06               | 93.03                  | 184.07               | 92.54                  | <b>N</b> | 905.50        | 453.25                | 888.47               | 444.74                 | <b>7</b> |
| <b>3</b> | 301.15        | 151.08                | 284.12               | 142.57                 | 283.14               | 142.07                 | <b>V</b> | <b>791.46</b> | 396.23                | 774.43               | 387.72                 | <b>6</b> |
| <b>4</b> | 414.23        | 207.62                | 397.21               | 199.11                 | 396.22               | 198.62                 | <b>L</b> | <b>692.39</b> | 346.70                | 675.36               | 338.18                 | <b>5</b> |
| <b>5</b> | 485.27        | 243.14                | 468.25               | 234.63                 | 467.26               | 234.13                 | <b>A</b> | <b>579.30</b> | 290.16                | 562.28               | 281.64                 | <b>4</b> |
| <b>6</b> | 632.34        | 316.67                | 615.31               | 308.16                 | 614.33               | 307.67                 | <b>F</b> | <b>508.27</b> | 254.64                | <b>491.24</b>        | 246.12                 | <b>3</b> |
| <b>7</b> | 818.42        | 409.71                | 801.39               | 401.20                 | 800.41               | 400.71                 | <b>W</b> | <b>361.20</b> | 181.10                | <b>344.17</b>        | 172.59                 | <b>2</b> |
| <b>8</b> |               |                       |                      |                        |                      |                        | <b>R</b> | <b>175.12</b> | 88.06                 | 158.09               | 79.55                  | <b>1</b> |

MS/MS Fragmentation of ID707 **SLGVEFIPLEASVK**

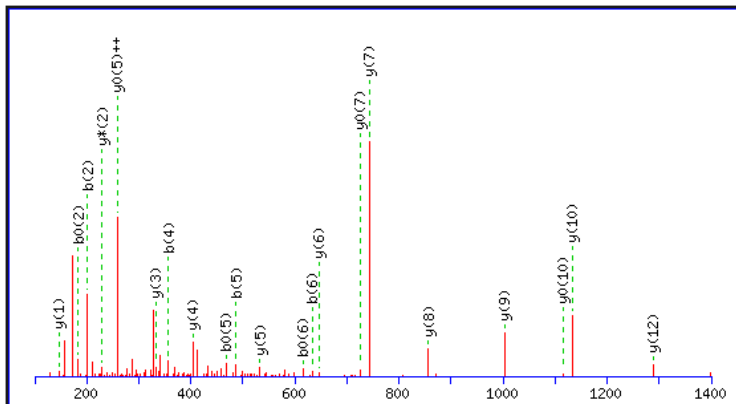

| #         | <b>b</b>      | <b>b<sup>++</sup></b> | <b>b<sup>0</sup></b> | <b>b<sup>0++</sup></b> | Seq.     | <b>y</b>       | <b>y<sup>++</sup></b> | <b>y*</b>     | <b>y<sup>*++</sup></b> | <b>y<sup>0</sup></b> | <b>y<sup>0++</sup></b> | #         |
|-----------|---------------|-----------------------|----------------------|------------------------|----------|----------------|-----------------------|---------------|------------------------|----------------------|------------------------|-----------|
| <b>1</b>  | 88.04         | 44.52                 | 70.03                | 35.52                  | <b>S</b> |                |                       |               |                        |                      |                        | <b>14</b> |
| <b>2</b>  | <b>201.12</b> | 101.07                | <b>183.11</b>        | 92.06                  | <b>L</b> | 1401.80        | 701.40                | 1384.77       | 692.89                 | 1383.79              | 692.40                 | <b>13</b> |
| <b>3</b>  | <b>258.14</b> | 129.58                | 240.13               | 120.57                 | <b>G</b> | <b>1288.71</b> | 644.86                | 1271.69       | 636.35                 | 1270.70              | 635.86                 | <b>12</b> |
| <b>4</b>  | <b>357.21</b> | 179.11                | 339.20               | 170.10                 | <b>V</b> | 1231.69        | 616.35                | 1214.67       | 607.84                 | 1213.68              | 607.34                 | <b>11</b> |
| <b>5</b>  | <b>486.26</b> | 243.63                | <b>468.25</b>        | 234.63                 | <b>E</b> | <b>1132.62</b> | 566.82                | 1115.60       | 558.30                 | <b>1114.61</b>       | 557.81                 | <b>10</b> |
| <b>6</b>  | <b>633.32</b> | 317.17                | <b>615.31</b>        | 308.16                 | <b>F</b> | <b>1003.58</b> | 502.29                | 986.56        | 493.78                 | 985.57               | 493.29                 | <b>9</b>  |
| <b>7</b>  | 746.41        | 373.71                | 728.40               | 364.70                 | <b>I</b> | <b>856.51</b>  | 428.76                | 839.49        | 420.25                 | 838.50               | 419.76                 | <b>8</b>  |
| <b>8</b>  | 843.46        | 422.23                | 825.45               | 413.23                 | <b>P</b> | <b>743.43</b>  | 372.22                | 726.40        | 363.71                 | <b>725.42</b>        | 363.21                 | <b>7</b>  |
| <b>9</b>  | 956.55        | 478.78                | 938.53               | 469.77                 | <b>L</b> | <b>646.38</b>  | 323.69                | 629.35        | 315.18                 | 628.37               | 314.69                 | <b>6</b>  |
| <b>10</b> | 1085.59       | 543.30                | 1067.58              | 534.29                 | <b>E</b> | <b>533.29</b>  | 267.15                | 516.27        | 258.64                 | 515.28               | <b>258.14</b>          | <b>5</b>  |
| <b>11</b> | 1156.62       | 578.82                | 1138.61              | 569.81                 | <b>A</b> | <b>404.25</b>  | 202.63                | 387.22        | 194.12                 | 386.24               | 193.62                 | <b>4</b>  |
| <b>12</b> | 1243.66       | 622.33                | 1225.65              | 613.33                 | <b>S</b> | <b>333.21</b>  | 167.11                | 316.19        | 158.60                 | 315.20               | 158.10                 | <b>3</b>  |
| <b>13</b> | 1342.73       | 671.87                | 1324.71              | 662.86                 | <b>V</b> | 246.18         | 123.59                | <b>229.15</b> | 115.08                 |                      |                        | <b>2</b>  |
| <b>14</b> |               |                       |                      |                        | <b>K</b> | <b>147.11</b>  | 74.06                 | 130.09        | 65.55                  |                      |                        | <b>1</b>  |

MS/MS Fragmentation of ID708 **VFTQGFLPLDK**

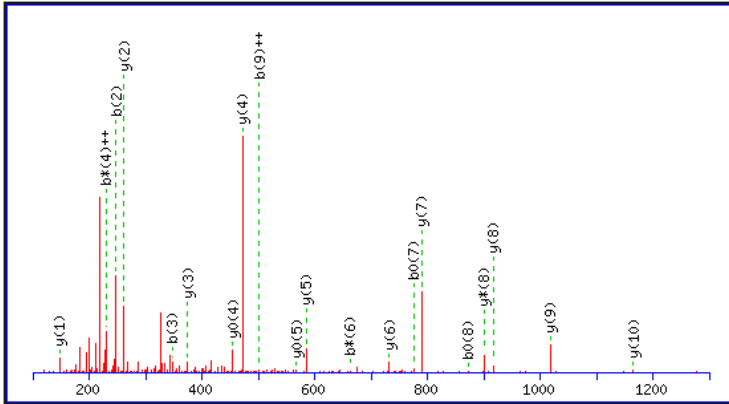

| #  | b             | b <sup>++</sup> | b*            | b <sup>*++</sup> | b <sup>0</sup> | b <sup>0++</sup> | Seq. | y              | y <sup>++</sup> | y*            | y <sup>*++</sup> | y <sup>0</sup> | y <sup>0++</sup> | #  |
|----|---------------|-----------------|---------------|------------------|----------------|------------------|------|----------------|-----------------|---------------|------------------|----------------|------------------|----|
| 1  | 100.08        | 50.54           |               |                  |                |                  | V    |                |                 |               |                  |                |                  | 11 |
| 2  | <b>247.14</b> | 124.08          |               |                  |                |                  | F    | <b>1165.63</b> | 583.32          | 1148.60       | 574.80           | 1147.61        | 574.31           | 10 |
| 3  | <b>348.19</b> | 174.60          |               |                  | 330.18         | 165.59           | T    | <b>1018.56</b> | 509.78          | 1001.53       | 501.27           | 1000.55        | 500.78           | 9  |
| 4  | 476.25        | 238.63          | 459.22        | <b>230.12</b>    | 458.24         | 229.62           | Q    | <b>917.51</b>  | 459.26          | <b>900.48</b> | 450.74           | 899.50         | 450.25           | 8  |
| 5  | 533.27        | 267.14          | 516.25        | 258.63           | 515.26         | 258.13           | G    | <b>789.45</b>  | 395.23          | 772.42        | 386.72           | 771.44         | 386.22           | 7  |
| 6  | 680.34        | 340.67          | <b>663.31</b> | 332.16           | 662.33         | 331.67           | F    | <b>732.43</b>  | 366.72          | 715.40        | 358.20           | 714.42         | 357.71           | 6  |
| 7  | 793.42        | 397.22          | 776.40        | 388.70           | <b>775.41</b>  | 388.21           | L    | <b>585.36</b>  | 293.18          | 568.33        | 284.67           | <b>567.35</b>  | 284.18           | 5  |
| 8  | 890.48        | 445.74          | 873.45        | 437.23           | <b>872.47</b>  | 436.74           | P    | <b>472.28</b>  | 236.64          | 455.25        | 228.13           | <b>454.27</b>  | 227.64           | 4  |
| 9  | 1003.56       | <b>502.28</b>   | 986.53        | 493.77           | 985.55         | 493.28           | L    | <b>375.22</b>  | 188.12          | 358.20        | 179.60           | 357.21         | 179.11           | 3  |
| 10 | 1118.59       | 559.80          | 1101.56       | 551.28           | 1100.58        | 550.79           | D    | <b>262.14</b>  | 131.57          | 245.11        | 123.06           | 244.13         | 122.57           | 2  |
| 11 |               |                 |               |                  |                |                  | K    | <b>147.11</b>  | 74.06           | 130.09        | 65.55            |                |                  | 1  |

MS/MS Fragmentation of ID711 **YIGLSEASASTIR**

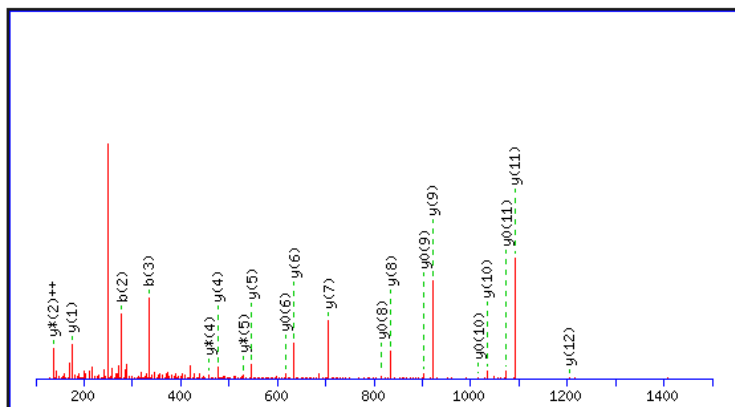

| #         | b             | b <sup>++</sup> | b <sup>0</sup> | b <sup>0++</sup> | Seq.     | y              | y <sup>++</sup> | y <sup>*</sup> | y <sup>*++</sup> | y <sup>0</sup> | y <sup>0++</sup> | #         |
|-----------|---------------|-----------------|----------------|------------------|----------|----------------|-----------------|----------------|------------------|----------------|------------------|-----------|
| <b>1</b>  | 164.07        | 82.54           |                |                  | <b>Y</b> |                |                 |                |                  |                |                  | <b>13</b> |
| <b>2</b>  | <b>277.15</b> | 139.08          |                |                  | <b>I</b> | <b>1204.65</b> | 602.83          | 1187.63        | 594.32           | 1186.64        | 593.82           | <b>12</b> |
| <b>3</b>  | <b>334.18</b> | 167.59          |                |                  | <b>G</b> | <b>1091.57</b> | 546.29          | 1074.54        | 537.77           | <b>1073.56</b> | 537.28           | <b>11</b> |
| <b>4</b>  | 447.26        | 224.13          |                |                  | <b>L</b> | <b>1034.55</b> | 517.78          | 1017.52        | 509.26           | <b>1016.54</b> | 508.77           | <b>10</b> |
| <b>5</b>  | 534.29        | 267.65          | 516.28         | 258.64           | <b>S</b> | <b>921.46</b>  | 461.24          | 904.44         | 452.72           | <b>903.45</b>  | 452.23           | <b>9</b>  |
| <b>6</b>  | 663.33        | 332.17          | 645.32         | 323.17           | <b>E</b> | <b>834.43</b>  | 417.72          | 817.41         | 409.21           | <b>816.42</b>  | 408.71           | <b>8</b>  |
| <b>7</b>  | 734.37        | 367.69          | 716.36         | 358.68           | <b>A</b> | <b>705.39</b>  | 353.20          | 688.36         | 344.68           | 687.38         | 344.19           | <b>7</b>  |
| <b>8</b>  | 821.40        | 411.21          | 803.39         | 402.20           | <b>S</b> | <b>634.35</b>  | 317.68          | 617.33         | 309.17           | <b>616.34</b>  | 308.67           | <b>6</b>  |
| <b>9</b>  | 892.44        | 446.72          | 874.43         | 437.72           | <b>A</b> | <b>547.32</b>  | 274.16          | <b>530.29</b>  | 265.65           | 529.31         | 265.16           | <b>5</b>  |
| <b>10</b> | 979.47        | 490.24          | 961.46         | 481.23           | <b>S</b> | <b>476.28</b>  | 238.64          | <b>459.26</b>  | 230.13           | 458.27         | 229.64           | <b>4</b>  |
| <b>11</b> | 1080.52       | 540.76          | 1062.51        | 531.76           | <b>T</b> | 389.25         | 195.13          | 372.22         | 186.62           | 371.24         | 186.12           | <b>3</b>  |
| <b>12</b> | 1193.60       | 597.31          | 1175.59        | 588.30           | <b>I</b> | 288.20         | 144.61          | 271.18         | <b>136.09</b>    |                |                  | <b>2</b>  |
| <b>13</b> |               |                 |                |                  | <b>R</b> | <b>175.12</b>  | 88.06           | 158.09         | 79.55            |                |                  | <b>1</b>  |

MS/MS Fragmentation of ID712 **YIGLSEASASTIR**

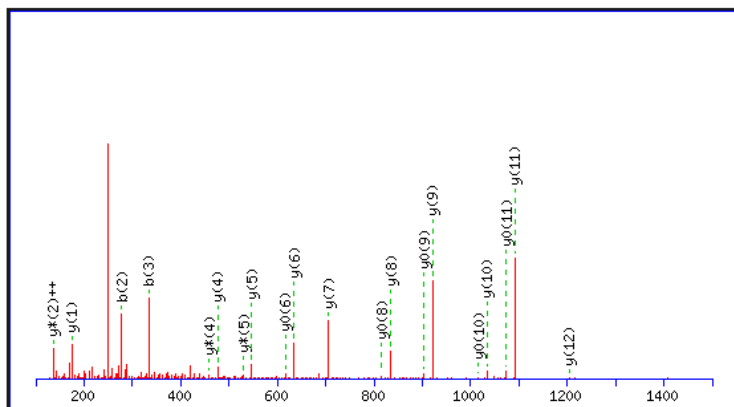

| #         | b             | b <sup>++</sup> | b <sup>0</sup> | b <sup>0++</sup> | Seq.     | y              | y <sup>++</sup> | y <sup>*</sup> | y <sup>*++</sup> | y <sup>0</sup> | y <sup>0++</sup> | #         |
|-----------|---------------|-----------------|----------------|------------------|----------|----------------|-----------------|----------------|------------------|----------------|------------------|-----------|
| <b>1</b>  | 164.07        | 82.54           |                |                  | <b>Y</b> |                |                 |                |                  |                |                  | <b>13</b> |
| <b>2</b>  | <b>277.15</b> | 139.08          |                |                  | <b>I</b> | <b>1204.65</b> | 602.83          | 1187.63        | 594.32           | 1186.64        | 593.82           | <b>12</b> |
| <b>3</b>  | <b>334.18</b> | 167.59          |                |                  | <b>G</b> | <b>1091.57</b> | 546.29          | 1074.54        | 537.77           | <b>1073.56</b> | 537.28           | <b>11</b> |
| <b>4</b>  | 447.26        | 224.13          |                |                  | <b>L</b> | <b>1034.55</b> | 517.78          | 1017.52        | 509.26           | <b>1016.54</b> | 508.77           | <b>10</b> |
| <b>5</b>  | 534.29        | 267.65          | 516.28         | 258.64           | <b>S</b> | <b>921.46</b>  | 461.24          | 904.44         | 452.72           | <b>903.45</b>  | 452.23           | <b>9</b>  |
| <b>6</b>  | 663.33        | 332.17          | 645.32         | 323.17           | <b>E</b> | <b>834.43</b>  | 417.72          | 817.41         | 409.21           | <b>816.42</b>  | 408.71           | <b>8</b>  |
| <b>7</b>  | 734.37        | 367.69          | 716.36         | 358.68           | <b>A</b> | <b>705.39</b>  | 353.20          | 688.36         | 344.68           | 687.38         | 344.19           | <b>7</b>  |
| <b>8</b>  | 821.40        | 411.21          | 803.39         | 402.20           | <b>S</b> | <b>634.35</b>  | 317.68          | 617.33         | 309.17           | <b>616.34</b>  | 308.67           | <b>6</b>  |
| <b>9</b>  | 892.44        | 446.72          | 874.43         | 437.72           | <b>A</b> | <b>547.32</b>  | 274.16          | <b>530.29</b>  | 265.65           | 529.31         | 265.16           | <b>5</b>  |
| <b>10</b> | 979.47        | 490.24          | 961.46         | 481.23           | <b>S</b> | <b>476.28</b>  | 238.64          | <b>459.26</b>  | 230.13           | 458.27         | 229.64           | <b>4</b>  |
| <b>11</b> | 1080.52       | 540.76          | 1062.51        | 531.76           | <b>T</b> | 389.25         | 195.13          | 372.22         | 186.62           | 371.24         | 186.12           | <b>3</b>  |
| <b>12</b> | 1193.60       | 597.31          | 1175.59        | 588.30           | <b>I</b> | 288.20         | 144.61          | 271.18         | <b>136.09</b>    |                |                  | <b>2</b>  |
| <b>13</b> |               |                 |                |                  | <b>R</b> | <b>175.12</b>  | 88.06           | 158.09         | 79.55            |                |                  | <b>1</b>  |

MS/MS Fragmentation of ID713 **EQWSPALTISK**

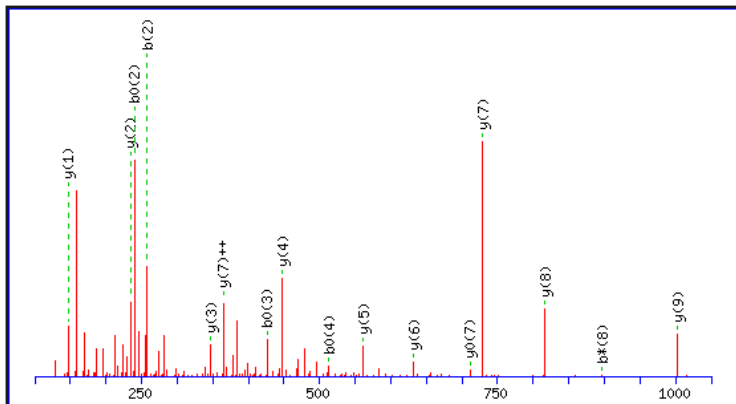

| #  | <b>b</b>      | <b>b<sup>++</sup></b> | <b>b*</b>     | <b>b<sup>+++</sup></b> | <b>b<sup>0</sup></b> | <b>b<sup>0++</sup></b> | Seq. | <b>y</b>       | <b>y<sup>++</sup></b> | <b>y*</b> | <b>y<sup>+++</sup></b> | <b>y<sup>0</sup></b> | <b>y<sup>0++</sup></b> | #  |
|----|---------------|-----------------------|---------------|------------------------|----------------------|------------------------|------|----------------|-----------------------|-----------|------------------------|----------------------|------------------------|----|
| 1  | 130.05        | 65.53                 |               |                        | 112.04               | 56.52                  | E    |                |                       |           |                        |                      |                        | 11 |
| 2  | <b>258.11</b> | 129.56                | 241.08        | 121.04                 | <b>240.10</b>        | 120.55                 | Q    | 1130.62        | 565.81                | 1113.59   | 557.30                 | 1112.61              | 556.81                 | 10 |
| 3  | 444.19        | 222.60                | 427.16        | 214.08                 | <b>426.18</b>        | 213.59                 | W    | <b>1002.56</b> | 501.78                | 985.54    | 493.27                 | 984.55               | 492.78                 | 9  |
| 4  | 531.22        | 266.11                | 514.19        | 257.60                 | <b>513.21</b>        | 257.11                 | S    | <b>816.48</b>  | 408.74                | 799.46    | 400.23                 | 798.47               | 399.74                 | 8  |
| 5  | 628.27        | 314.64                | 611.25        | 306.13                 | 610.26               | 305.63                 | P    | <b>729.45</b>  | <b>365.23</b>         | 712.42    | 356.72                 | <b>711.44</b>        | 356.22                 | 7  |
| 6  | 699.31        | 350.16                | 682.28        | 341.65                 | 681.30               | 341.15                 | A    | <b>632.40</b>  | 316.70                | 615.37    | 308.19                 | 614.39               | 307.70                 | 6  |
| 7  | 812.39        | 406.70                | 795.37        | 398.19                 | 794.38               | 397.70                 | L    | <b>561.36</b>  | 281.18                | 544.33    | 272.67                 | 543.35               | 272.18                 | 5  |
| 8  | 913.44        | 457.22                | <b>896.41</b> | 448.71                 | 895.43               | 448.22                 | T    | <b>448.28</b>  | 224.64                | 431.25    | 216.13                 | 430.27               | 215.64                 | 4  |
| 9  | 1026.53       | 513.77                | 1009.50       | 505.25                 | 1008.51              | 504.76                 | I    | <b>347.23</b>  | 174.12                | 330.20    | 165.60                 | 329.22               | 165.11                 | 3  |
| 10 | 1113.56       | 557.28                | 1096.53       | 548.77                 | 1095.55              | 548.28                 | S    | <b>234.14</b>  | 117.58                | 217.12    | 109.06                 | 216.13               | 108.57                 | 2  |
| 11 |               |                       |               |                        |                      |                        | K    | <b>147.11</b>  | 74.06                 | 130.09    | 65.55                  |                      |                        | 1  |

MS/MS Fragmentation of ID718 **AIREDIVSGK**

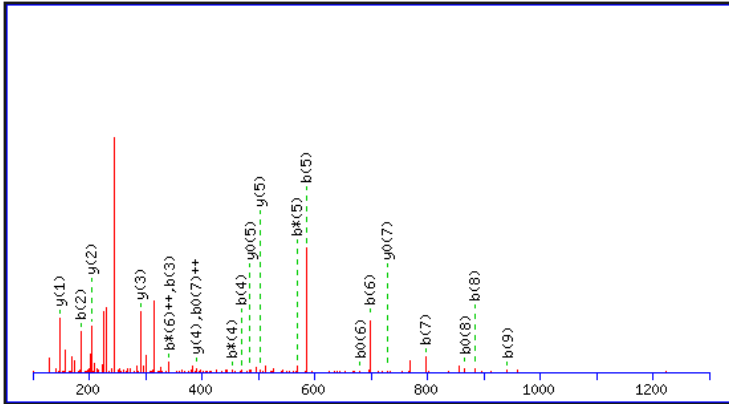

| #         | <b>b</b>      | <b>b<sup>++</sup></b> | <b>b<sup>*</sup></b> | <b>b<sup>*++</sup></b> | <b>b<sup>0</sup></b> | <b>b<sup>0++</sup></b> | Seq.     | <b>y</b>      | <b>y<sup>++</sup></b> | <b>y<sup>*</sup></b> | <b>y<sup>*++</sup></b> | <b>y<sup>0</sup></b> | <b>y<sup>0++</sup></b> | #         |
|-----------|---------------|-----------------------|----------------------|------------------------|----------------------|------------------------|----------|---------------|-----------------------|----------------------|------------------------|----------------------|------------------------|-----------|
| <b>1</b>  | 72.04         | 36.53                 |                      |                        |                      |                        | <b>A</b> |               |                       |                      |                        |                      |                        | <b>10</b> |
| <b>2</b>  | <b>185.13</b> | 93.07                 |                      |                        |                      |                        | <b>I</b> | 1016.57       | 508.79                | 999.55               | 500.28                 | 998.56               | 499.79                 | <b>9</b>  |
| <b>3</b>  | <b>341.23</b> | 171.12                | 324.20               | 162.61                 |                      |                        | <b>R</b> | 903.49        | 452.25                | 886.46               | 443.74                 | 885.48               | 443.24                 | <b>8</b>  |
| <b>4</b>  | <b>470.27</b> | 235.64                | <b>453.25</b>        | 227.13                 | 452.26               | 226.63                 | <b>E</b> | 747.39        | 374.20                | 730.36               | 365.68                 | <b>729.38</b>        | 365.19                 | <b>7</b>  |
| <b>5</b>  | <b>585.30</b> | 293.15                | <b>568.27</b>        | 284.64                 | 567.29               | 284.15                 | <b>D</b> | 618.35        | 309.68                | 601.32               | 301.16                 | 600.34               | 300.67                 | <b>6</b>  |
| <b>6</b>  | <b>698.38</b> | 349.70                | 681.36               | <b>341.18</b>          | <b>680.37</b>        | 340.69                 | <b>I</b> | <b>503.32</b> | 252.16                | 486.29               | 243.65                 | <b>485.31</b>        | 243.16                 | <b>5</b>  |
| <b>7</b>  | <b>797.45</b> | 399.23                | 780.43               | 390.72                 | 779.44               | <b>390.22</b>          | <b>V</b> | <b>390.23</b> | 195.62                | 373.21               | 187.11                 | 372.22               | 186.62                 | <b>4</b>  |
| <b>8</b>  | <b>884.48</b> | 442.75                | 867.46               | 434.23                 | <b>866.47</b>        | 433.74                 | <b>S</b> | <b>291.17</b> | 146.09                | 274.14               | 137.57                 | 273.16               | 137.08                 | <b>3</b>  |
| <b>9</b>  | <b>941.51</b> | 471.26                | 924.48               | 462.74                 | 923.49               | 462.25                 | <b>G</b> | <b>204.13</b> | 102.57                | 187.11               | 94.06                  |                      |                        | <b>2</b>  |
| <b>10</b> |               |                       |                      |                        |                      |                        | <b>K</b> | <b>147.11</b> | 74.06                 | 130.09               | 65.55                  |                      |                        | <b>1</b>  |



MS/MS Fragmentation of ID733 **VAPYFGAIVGR**

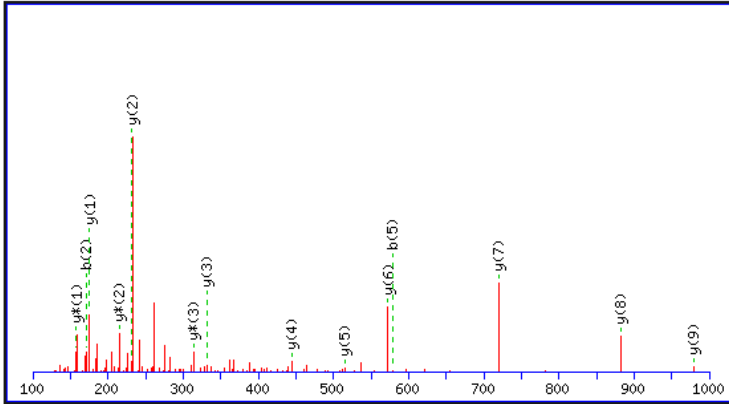

| #  | b             | b <sup>++</sup> | Seq. | y             | y <sup>++</sup> | y*            | y <sup>*++</sup> | #  |
|----|---------------|-----------------|------|---------------|-----------------|---------------|------------------|----|
| 1  | 100.08        | 50.54           | V    |               |                 |               |                  | 11 |
| 2  | <b>171.11</b> | 86.06           | A    | 1050.57       | 525.79          | 1033.55       | 517.28           | 10 |
| 3  | 268.17        | 134.59          | P    | <b>979.54</b> | 490.27          | 962.51        | 481.76           | 9  |
| 4  | 431.23        | 216.12          | Y    | <b>882.48</b> | 441.75          | 865.46        | 433.23           | 8  |
| 5  | <b>578.30</b> | 289.65          | F    | <b>719.42</b> | 360.21          | 702.39        | 351.70           | 7  |
| 6  | 635.32        | 318.16          | G    | <b>572.35</b> | 286.68          | 555.32        | 278.17           | 6  |
| 7  | 706.36        | 353.68          | A    | <b>515.33</b> | 258.17          | 498.30        | 249.66           | 5  |
| 8  | 819.44        | 410.22          | I    | <b>444.29</b> | 222.65          | 427.27        | 214.14           | 4  |
| 9  | 918.51        | 459.76          | V    | <b>331.21</b> | 166.11          | <b>314.18</b> | 157.59           | 3  |
| 10 | 975.53        | 488.27          | G    | <b>232.14</b> | 116.57          | <b>215.11</b> | 108.06           | 2  |
| 11 |               |                 | R    | <b>175.12</b> | 88.06           | <b>158.09</b> | 79.55            | 1  |

MS/MS Fragmentation of ID739 **ELTDSVEFFR**

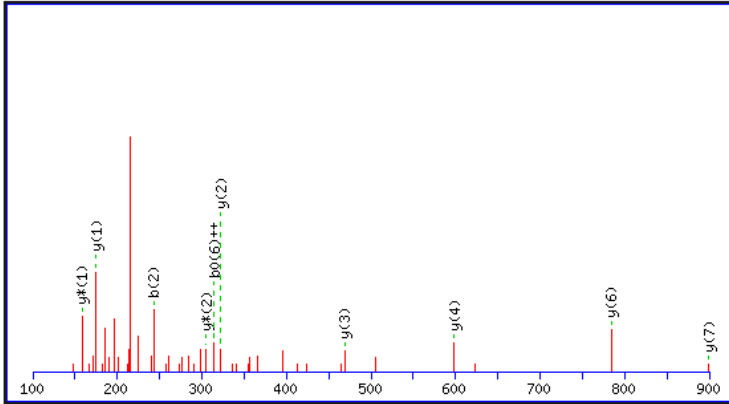

| #         | <b>b</b>      | <b>b<sup>++</sup></b> | <b>b<sup>0</sup></b> | <b>b<sup>0++</sup></b> | <b>Seq.</b> | <b>y</b>      | <b>y<sup>++</sup></b> | <b>y<sup>*</sup></b> | <b>y<sup>*++</sup></b> | <b>y<sup>0</sup></b> | <b>y<sup>0++</sup></b> | #         |
|-----------|---------------|-----------------------|----------------------|------------------------|-------------|---------------|-----------------------|----------------------|------------------------|----------------------|------------------------|-----------|
| <b>1</b>  | 130.05        | 65.53                 | 112.04               | 56.52                  | <b>E</b>    |               |                       |                      |                        |                      |                        | <b>10</b> |
| <b>2</b>  | <b>243.13</b> | 122.07                | 225.12               | 113.07                 | <b>L</b>    | 1113.56       | 557.28                | 1096.53              | 548.77                 | 1095.55              | 548.28                 | <b>9</b>  |
| <b>3</b>  | 344.18        | 172.59                | 326.17               | 163.59                 | <b>T</b>    | 1000.47       | 500.74                | 983.45               | 492.23                 | 982.46               | 491.74                 | <b>8</b>  |
| <b>4</b>  | 459.21        | 230.11                | 441.20               | 221.10                 | <b>D</b>    | <b>899.43</b> | 450.22                | 882.40               | 441.70                 | 881.42               | 441.21                 | <b>7</b>  |
| <b>5</b>  | 546.24        | 273.62                | 528.23               | 264.62                 | <b>S</b>    | <b>784.40</b> | 392.70                | 767.37               | 384.19                 | 766.39               | 383.70                 | <b>6</b>  |
| <b>6</b>  | 645.31        | 323.16                | 627.30               | <b>314.15</b>          | <b>V</b>    | 697.37        | 349.19                | 680.34               | 340.67                 | 679.36               | 340.18                 | <b>5</b>  |
| <b>7</b>  | 774.35        | 387.68                | 756.34               | 378.67                 | <b>E</b>    | <b>598.30</b> | 299.65                | 581.27               | 291.14                 | 580.29               | 290.65                 | <b>4</b>  |
| <b>8</b>  | 921.42        | 461.21                | 903.41               | 452.21                 | <b>F</b>    | <b>469.26</b> | 235.13                | 452.23               | 226.62                 |                      |                        | <b>3</b>  |
| <b>9</b>  | 1068.49       | 534.75                | 1050.48              | 525.74                 | <b>F</b>    | <b>322.19</b> | 161.60                | <b>305.16</b>        | 153.08                 |                      |                        | <b>2</b>  |
| <b>10</b> |               |                       |                      |                        | <b>R</b>    | <b>175.12</b> | 88.06                 | <b>158.09</b>        | 79.55                  |                      |                        | <b>1</b>  |

MS/MS Fragmentation of ID740 **SLLNESNEFVGDK**

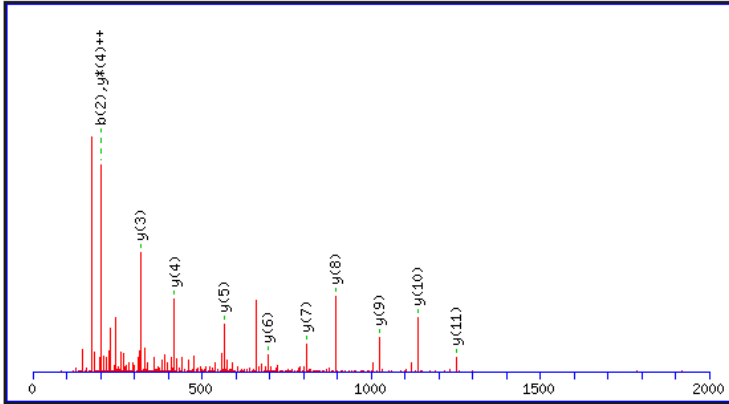

| #         | <b>b</b>      | <b>b<sup>++</sup></b> | <b>b*</b> | <b>b<sup>*++</sup></b> | <b>b<sup>0</sup></b> | <b>b<sup>0++</sup></b> | Seq.     | <b>y</b>       | <b>y<sup>++</sup></b> | <b>y*</b> | <b>y<sup>*++</sup></b> | <b>y<sup>0</sup></b> | <b>y<sup>0++</sup></b> | #         |
|-----------|---------------|-----------------------|-----------|------------------------|----------------------|------------------------|----------|----------------|-----------------------|-----------|------------------------|----------------------|------------------------|-----------|
| <b>1</b>  | 88.04         | 44.52                 |           |                        | 70.03                | 35.52                  | <b>S</b> |                |                       |           |                        |                      |                        | <b>13</b> |
| <b>2</b>  | <b>201.12</b> | 101.07                |           |                        | 183.11               | 92.06                  | <b>L</b> | 1364.67        | 682.84                | 1347.64   | 674.32                 | 1346.66              | 673.83                 | <b>12</b> |
| <b>3</b>  | 314.21        | 157.61                |           |                        | 296.20               | 148.60                 | <b>L</b> | <b>1251.59</b> | 626.30                | 1234.56   | 617.78                 | 1233.57              | 617.29                 | <b>11</b> |
| <b>4</b>  | 428.25        | 214.63                | 411.22    | 206.12                 | 410.24               | 205.62                 | <b>N</b> | <b>1138.50</b> | 569.75                | 1121.47   | 561.24                 | 1120.49              | 560.75                 | <b>10</b> |
| <b>5</b>  | 557.29        | 279.15                | 540.27    | 270.64                 | 539.28               | 270.14                 | <b>E</b> | <b>1024.46</b> | 512.73                | 1007.43   | 504.22                 | 1006.45              | 503.73                 | <b>9</b>  |
| <b>6</b>  | 644.32        | 322.67                | 627.30    | 314.15                 | 626.31               | 313.66                 | <b>S</b> | <b>895.42</b>  | 448.21                | 878.39    | 439.70                 | 877.41               | 439.21                 | <b>8</b>  |
| <b>7</b>  | 758.37        | 379.69                | 741.34    | 371.17                 | 740.36               | 370.68                 | <b>N</b> | <b>808.38</b>  | 404.70                | 791.36    | 396.18                 | 790.37               | 395.69                 | <b>7</b>  |
| <b>8</b>  | 887.41        | 444.21                | 870.38    | 435.70                 | 869.40               | 435.20                 | <b>E</b> | <b>694.34</b>  | 347.67                | 677.31    | 339.16                 | 676.33               | 338.67                 | <b>6</b>  |
| <b>9</b>  | 1034.48       | 517.74                | 1017.45   | 509.23                 | 1016.47              | 508.74                 | <b>F</b> | <b>565.30</b>  | 283.15                | 548.27    | 274.64                 | 547.29               | 274.15                 | <b>5</b>  |
| <b>10</b> | 1133.55       | 567.28                | 1116.52   | 558.76                 | 1115.54              | 558.27                 | <b>V</b> | <b>418.23</b>  | 209.62                | 401.20    | <b>201.11</b>          | 400.22               | 200.61                 | <b>4</b>  |
| <b>11</b> | 1190.57       | 595.79                | 1173.54   | 587.27                 | 1172.56              | 586.78                 | <b>G</b> | <b>319.16</b>  | 160.08                | 302.13    | 151.57                 | 301.15               | 151.08                 | <b>3</b>  |
| <b>12</b> | 1305.60       | 653.30                | 1288.57   | 644.79                 | 1287.59              | 644.30                 | <b>D</b> | 262.14         | 131.57                | 245.11    | 123.06                 | 244.13               | 122.57                 | <b>2</b>  |
| <b>13</b> |               |                       |           |                        |                      |                        | <b>K</b> | 147.11         | 74.06                 | 130.09    | 65.55                  |                      |                        | <b>1</b>  |

MS/MS Fragmentation of ID747 **FINSIPTPR**

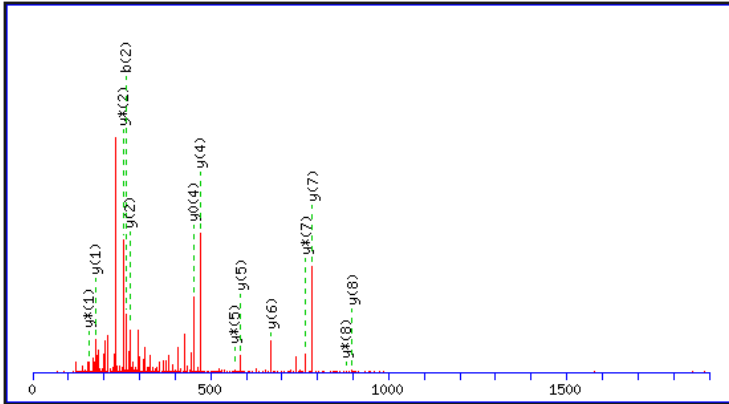

| #        | <b>b</b>      | <b>b<sup>++</sup></b> | <b>b<sup>*</sup></b> | <b>b<sup>*++</sup></b> | <b>b<sup>0</sup></b> | <b>b<sup>0++</sup></b> | Seq.     | <b>y</b>      | <b>y<sup>++</sup></b> | <b>y<sup>*</sup></b> | <b>y<sup>*++</sup></b> | <b>y<sup>0</sup></b> | <b>y<sup>0++</sup></b> | #        |
|----------|---------------|-----------------------|----------------------|------------------------|----------------------|------------------------|----------|---------------|-----------------------|----------------------|------------------------|----------------------|------------------------|----------|
| <b>1</b> | 148.08        | 74.54                 |                      |                        |                      |                        | <b>F</b> |               |                       |                      |                        |                      |                        | <b>9</b> |
| <b>2</b> | <b>261.16</b> | 131.08                |                      |                        |                      |                        | <b>I</b> | <b>897.52</b> | 449.26                | <b>880.49</b>        | 440.75                 | 879.50               | 440.26                 | <b>8</b> |
| <b>3</b> | 375.20        | 188.10                | 358.18               | 179.59                 |                      |                        | <b>N</b> | <b>784.43</b> | 392.72                | <b>767.40</b>        | 384.21                 | 766.42               | 383.71                 | <b>7</b> |
| <b>4</b> | 462.23        | 231.62                | 445.21               | 223.11                 | 444.22               | 222.62                 | <b>S</b> | <b>670.39</b> | 335.70                | 653.36               | 327.18                 | 652.38               | 326.69                 | <b>6</b> |
| <b>5</b> | 575.32        | 288.16                | 558.29               | 279.65                 | 557.31               | 279.16                 | <b>I</b> | <b>583.36</b> | 292.18                | <b>566.33</b>        | 283.67                 | 565.35               | 283.18                 | <b>5</b> |
| <b>6</b> | 672.37        | 336.69                | 655.34               | 328.18                 | 654.36               | 327.68                 | <b>P</b> | <b>470.27</b> | 235.64                | 453.25               | 227.13                 | <b>452.26</b>        | 226.63                 | <b>4</b> |
| <b>7</b> | 773.42        | 387.21                | 756.39               | 378.70                 | 755.41               | 378.21                 | <b>T</b> | 373.22        | 187.11                | 356.19               | 178.60                 | 355.21               | 178.11                 | <b>3</b> |
| <b>8</b> | 870.47        | 435.74                | 853.45               | 427.23                 | 852.46               | 426.73                 | <b>P</b> | <b>272.17</b> | 136.59                | <b>255.15</b>        | 128.08                 |                      |                        | <b>2</b> |
| <b>9</b> |               |                       |                      |                        |                      |                        | <b>R</b> | <b>175.12</b> | 88.06                 | <b>158.09</b>        | 79.55                  |                      |                        | <b>1</b> |

MS/MS Fragmentation of ID748 **GILAADESTGTIGK**

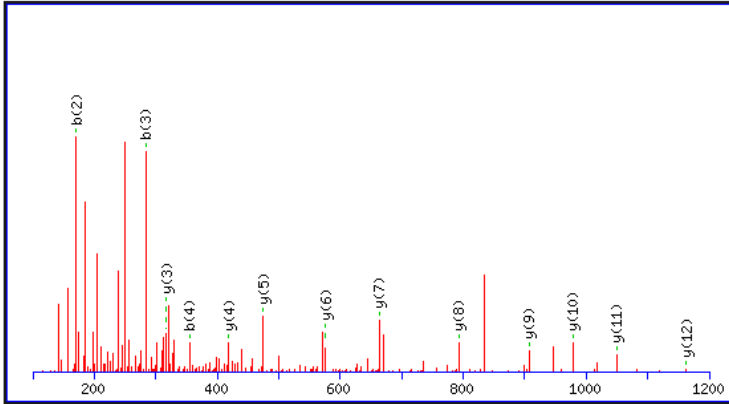

| #  | b             | b <sup>++</sup> | b <sup>0</sup> | b <sup>0++</sup> | Seq.     | y              | y <sup>++</sup> | y*      | y <sup>*++</sup> | y <sup>0</sup> | y <sup>0++</sup> | #         |
|----|---------------|-----------------|----------------|------------------|----------|----------------|-----------------|---------|------------------|----------------|------------------|-----------|
| 1  | 58.03         | 29.52           |                |                  | <b>G</b> |                |                 |         |                  |                |                  | <b>14</b> |
| 2  | <b>171.11</b> | 86.06           |                |                  | <b>I</b> | 1275.68        | 638.34          | 1258.65 | 629.83           | 1257.67        | 629.34           | <b>13</b> |
| 3  | <b>284.20</b> | 142.60          |                |                  | <b>L</b> | <b>1162.59</b> | 581.80          | 1145.57 | 573.29           | 1144.58        | 572.80           | <b>12</b> |
| 4  | <b>355.23</b> | 178.12          |                |                  | <b>A</b> | <b>1049.51</b> | 525.26          | 1032.48 | 516.75           | 1031.50        | 516.25           | <b>11</b> |
| 5  | 426.27        | 213.64          |                |                  | <b>A</b> | <b>978.47</b>  | 489.74          | 961.45  | 481.23           | 960.46         | 480.74           | <b>10</b> |
| 6  | 541.30        | 271.15          | 523.29         | 262.15           | <b>D</b> | <b>907.44</b>  | 454.22          | 890.41  | 445.71           | 889.43         | 445.22           | <b>9</b>  |
| 7  | 670.34        | 335.67          | 652.33         | 326.67           | <b>E</b> | <b>792.41</b>  | 396.71          | 775.38  | 388.20           | 774.40         | 387.70           | <b>8</b>  |
| 8  | 757.37        | 379.19          | 739.36         | 370.18           | <b>S</b> | <b>663.37</b>  | 332.19          | 646.34  | 323.67           | 645.36         | 323.18           | <b>7</b>  |
| 9  | 858.42        | 429.71          | 840.41         | 420.71           | <b>T</b> | <b>576.34</b>  | 288.67          | 559.31  | 280.16           | 558.32         | 279.67           | <b>6</b>  |
| 10 | 915.44        | 458.22          | 897.43         | 449.22           | <b>G</b> | <b>475.29</b>  | 238.15          | 458.26  | 229.63           | 457.28         | 229.14           | <b>5</b>  |
| 11 | 1016.49       | 508.75          | 998.48         | 499.74           | <b>T</b> | <b>418.27</b>  | 209.64          | 401.24  | 201.12           | 400.26         | 200.63           | <b>4</b>  |
| 12 | 1129.57       | 565.29          | 1111.56        | 556.29           | <b>I</b> | <b>317.22</b>  | 159.11          | 300.19  | 150.60           |                |                  | <b>3</b>  |
| 13 | 1186.59       | 593.80          | 1168.58        | 584.80           | <b>G</b> | 204.13         | 102.57          | 187.11  | 94.06            |                |                  | <b>2</b>  |
| 14 |               |                 |                |                  | <b>K</b> | 147.11         | 74.06           | 130.09  | 65.55            |                |                  | <b>1</b>  |

MS/MS Fragmentation of ID750 **TAAYYQQGAR**

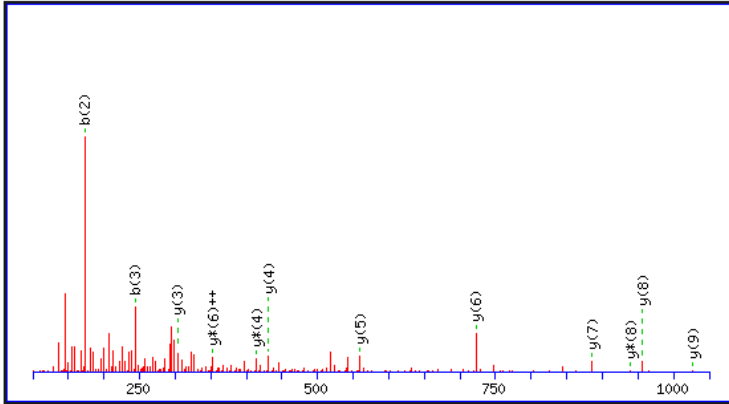

| #         | b             | b <sup>++</sup> | b <sup>*</sup> | b <sup>*++</sup> | b <sup>0</sup> | b <sup>0++</sup> | Seq.     | y              | y <sup>++</sup> | y <sup>*</sup> | y <sup>*++</sup> | #         |
|-----------|---------------|-----------------|----------------|------------------|----------------|------------------|----------|----------------|-----------------|----------------|------------------|-----------|
| <b>1</b>  | 102.05        | 51.53           |                |                  | 84.04          | 42.53            | <b>T</b> |                |                 |                |                  | <b>10</b> |
| <b>2</b>  | <b>173.09</b> | 87.05           |                |                  | 155.08         | 78.04            | <b>A</b> | <b>1027.50</b> | 514.25          | 1010.47        | 505.74           | <b>9</b>  |
| <b>3</b>  | <b>244.13</b> | 122.57          |                |                  | 226.12         | 113.56           | <b>A</b> | <b>956.46</b>  | 478.73          | <b>939.43</b>  | 470.22           | <b>8</b>  |
| <b>4</b>  | 407.19        | 204.10          |                |                  | 389.18         | 195.09           | <b>Y</b> | <b>885.42</b>  | 443.21          | 868.39         | 434.70           | <b>7</b>  |
| <b>5</b>  | 570.26        | 285.63          |                |                  | 552.25         | 276.63           | <b>Y</b> | <b>722.36</b>  | 361.68          | 705.33         | <b>353.17</b>    | <b>6</b>  |
| <b>6</b>  | 698.31        | 349.66          | 681.29         | 341.15           | 680.30         | 340.66           | <b>Q</b> | <b>559.29</b>  | 280.15          | 542.27         | 271.64           | <b>5</b>  |
| <b>7</b>  | 826.37        | 413.69          | 809.35         | 405.18           | 808.36         | 404.68           | <b>Q</b> | <b>431.24</b>  | 216.12          | <b>414.21</b>  | 207.61           | <b>4</b>  |
| <b>8</b>  | 883.39        | 442.20          | 866.37         | 433.69           | 865.38         | 433.20           | <b>G</b> | <b>303.18</b>  | 152.09          | 286.15         | 143.58           | <b>3</b>  |
| <b>9</b>  | 954.43        | 477.72          | 937.41         | 469.21           | 936.42         | 468.71           | <b>A</b> | 246.16         | 123.58          | 229.13         | 115.07           | <b>2</b>  |
| <b>10</b> |               |                 |                |                  |                |                  | <b>R</b> | 175.12         | 88.06           | 158.09         | 79.55            | <b>1</b>  |

MS/MS Fragmentation of ID752 **LLGVTMLDVVR**

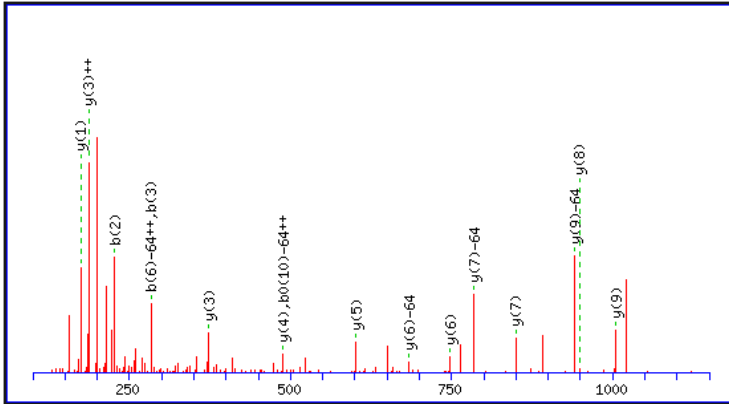

| #         | b             | b <sup>++</sup> | b <sup>0</sup> | b <sup>0++</sup> | Seq.     | y             | y <sup>++</sup> | y*      | y <sup>*++</sup> | y <sup>0</sup> | y <sup>0++</sup> | #         |
|-----------|---------------|-----------------|----------------|------------------|----------|---------------|-----------------|---------|------------------|----------------|------------------|-----------|
| <b>1</b>  | 114.09        | 57.55           |                |                  | <b>L</b> |               |                 |         |                  |                |                  | <b>11</b> |
| <b>2</b>  | <b>227.18</b> | 114.09          |                |                  | <b>L</b> | 1054.63       | 527.82          | 1037.60 | 519.30           | 1036.62        | 518.81           | <b>10</b> |
| <b>3</b>  | <b>284.20</b> | 142.60          |                |                  | <b>G</b> | <b>941.54</b> | 471.27          | 924.51  | 462.76           | 923.53         | 462.27           | <b>9</b>  |
| <b>4</b>  | 383.27        | 192.14          |                |                  | <b>V</b> | 884.52        | 442.76          | 867.49  | 434.25           | 866.51         | 433.76           | <b>8</b>  |
| <b>5</b>  | 484.31        | 242.66          | 466.30         | 233.65           | <b>T</b> | <b>785.45</b> | 393.23          | 768.43  | 384.72           | 767.44         | 384.22           | <b>7</b>  |
| <b>6</b>  | 567.35        | <b>284.18</b>   | 549.34         | 275.17           | <b>M</b> | <b>684.40</b> | 342.71          | 667.38  | 334.19           | 666.39         | 333.70           | <b>6</b>  |
| <b>7</b>  | 680.43        | 340.72          | 662.42         | 331.72           | <b>L</b> | <b>601.37</b> | 301.19          | 584.34  | 292.67           | 583.36         | 292.18           | <b>5</b>  |
| <b>8</b>  | 795.46        | 398.23          | 777.45         | 389.23           | <b>D</b> | <b>488.28</b> | 244.64          | 471.26  | 236.13           | 470.27         | 235.64           | <b>4</b>  |
| <b>9</b>  | 894.53        | 447.77          | 876.52         | 438.76           | <b>V</b> | <b>373.26</b> | <b>187.13</b>   | 356.23  | 178.62           |                |                  | <b>3</b>  |
| <b>10</b> | 993.60        | 497.30          | 975.59         | <b>488.30</b>    | <b>V</b> | 274.19        | 137.60          | 257.16  | 129.08           |                |                  | <b>2</b>  |
| <b>11</b> |               |                 |                |                  | <b>R</b> | <b>175.12</b> | 88.06           | 158.09  | 79.55            |                |                  | <b>1</b>  |

MS/MS Fragmentation of ID754 **AAVSAMPELLR**

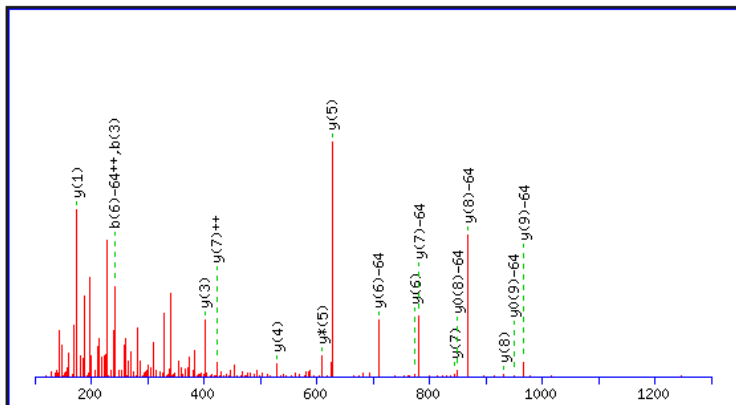

| #  | b             | b <sup>++</sup> | b <sup>0</sup> | b <sup>0++</sup> | Seq. | y             | y <sup>++</sup> | y <sup>*</sup> | y <sup>*++</sup> | y <sup>0</sup> | y <sup>0++</sup> | #  |
|----|---------------|-----------------|----------------|------------------|------|---------------|-----------------|----------------|------------------|----------------|------------------|----|
| 1  | 72.04         | 36.53           |                |                  | A    |               |                 |                |                  |                |                  | 11 |
| 2  | 143.08        | 72.04           |                |                  | A    | 1038.59       | 519.80          | 1021.57        | 511.29           | 1020.58        | 510.80           | 10 |
| 3  | <b>242.15</b> | 121.58          |                |                  | V    | <b>967.56</b> | 484.28          | 950.53         | 475.77           | <b>949.55</b>  | 475.28           | 9  |
| 4  | 329.18        | 165.09          | 311.17         | 156.09           | S    | <b>868.49</b> | 434.75          | 851.46         | 426.23           | <b>850.48</b>  | 425.74           | 8  |
| 5  | 400.22        | 200.61          | 382.21         | 191.61           | A    | <b>781.46</b> | 391.23          | 764.43         | 382.72           | 763.45         | 382.23           | 7  |
| 6  | 483.26        | <b>242.13</b>   | 465.25         | 233.13           | M    | <b>710.42</b> | 355.71          | 693.39         | 347.20           | 692.41         | 346.71           | 6  |
| 7  | 580.31        | 290.66          | 562.30         | 281.65           | P    | <b>627.38</b> | 314.19          | <b>610.36</b>  | 305.68           | 609.37         | 305.19           | 5  |
| 8  | 709.35        | 355.18          | 691.34         | 346.17           | E    | <b>530.33</b> | 265.67          | 513.30         | 257.16           | 512.32         | 256.66           | 4  |
| 9  | 822.44        | 411.72          | 804.43         | 402.72           | L    | <b>401.29</b> | 201.15          | 384.26         | 192.63           |                |                  | 3  |
| 10 | 935.52        | 468.26          | 917.51         | 459.26           | L    | 288.20        | 144.61          | 271.18         | 136.09           |                |                  | 2  |
| 11 |               |                 |                |                  | R    | <b>175.12</b> | 88.06           | 158.09         | 79.55            |                |                  | 1  |



MS/MS Fragmentation of ID755 **TENPELLVQR**

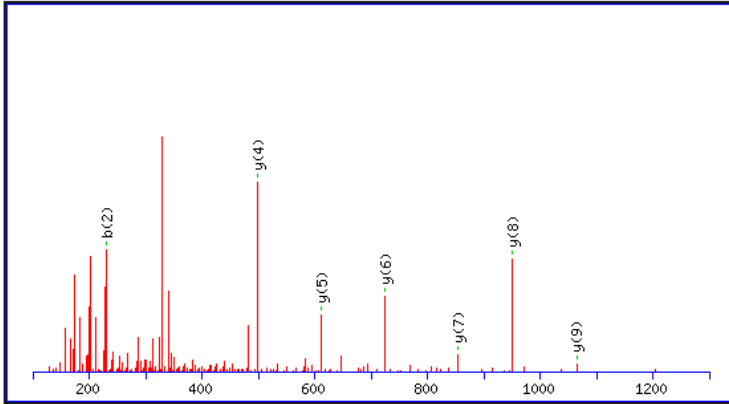

| #         | <b>b</b>      | <b>b<sup>++</sup></b> | <b>b<sup>*</sup></b> | <b>b<sup>*++</sup></b> | <b>b<sup>0</sup></b> | <b>b<sup>0++</sup></b> | Seq.     | <b>y</b>       | <b>y<sup>++</sup></b> | <b>y<sup>*</sup></b> | <b>y<sup>*++</sup></b> | <b>y<sup>0</sup></b> | <b>y<sup>0++</sup></b> | #         |
|-----------|---------------|-----------------------|----------------------|------------------------|----------------------|------------------------|----------|----------------|-----------------------|----------------------|------------------------|----------------------|------------------------|-----------|
| <b>1</b>  | 102.05        | 51.53                 |                      |                        | 84.04                | 42.53                  | <b>T</b> |                |                       |                      |                        |                      |                        | <b>11</b> |
| <b>2</b>  | <b>231.10</b> | 116.05                |                      |                        | 213.09               | 107.05                 | <b>E</b> | 1194.65        | 597.83                | 1177.62              | 589.31                 | 1176.64              | 588.82                 | <b>10</b> |
| <b>3</b>  | 345.14        | 173.07                | 328.11               | 164.56                 | 327.13               | 164.07                 | <b>N</b> | <b>1065.61</b> | 533.31                | 1048.58              | 524.79                 | 1047.59              | 524.30                 | <b>9</b>  |
| <b>4</b>  | 442.19        | 221.60                | 425.17               | 213.09                 | 424.18               | 212.59                 | <b>P</b> | <b>951.56</b>  | 476.28                | 934.54               | 467.77                 | 933.55               | 467.28                 | <b>8</b>  |
| <b>5</b>  | 571.24        | 286.12                | 554.21               | 277.61                 | 553.23               | 277.12                 | <b>E</b> | <b>854.51</b>  | 427.76                | 837.48               | 419.25                 | 836.50               | 418.75                 | <b>7</b>  |
| <b>6</b>  | 684.32        | 342.66                | 667.29               | 334.15                 | 666.31               | 333.66                 | <b>L</b> | <b>725.47</b>  | 363.24                | 708.44               | 354.72                 |                      |                        | <b>6</b>  |
| <b>7</b>  | 797.40        | 399.21                | 780.38               | 390.69                 | 779.39               | 390.20                 | <b>L</b> | <b>612.38</b>  | 306.70                | 595.36               | 298.18                 |                      |                        | <b>5</b>  |
| <b>8</b>  | 894.46        | 447.73                | 877.43               | 439.22                 | 876.45               | 438.73                 | <b>P</b> | <b>499.30</b>  | 250.15                | 482.27               | 241.64                 |                      |                        | <b>4</b>  |
| <b>9</b>  | 993.53        | 497.27                | 976.50               | 488.75                 | 975.51               | 488.26                 | <b>V</b> | 402.25         | 201.63                | 385.22               | 193.11                 |                      |                        | <b>3</b>  |
| <b>10</b> | 1121.58       | 561.30                | 1104.56              | 552.78                 | 1103.57              | 552.29                 | <b>Q</b> | 303.18         | 152.09                | 286.15               | 143.58                 |                      |                        | <b>2</b>  |
| <b>11</b> |               |                       |                      |                        |                      |                        | <b>R</b> | 175.12         | 88.06                 | 158.09               | 79.55                  |                      |                        | <b>1</b>  |

MS/MS Fragmentation of ID756 **ADVLQSAVGN GK**

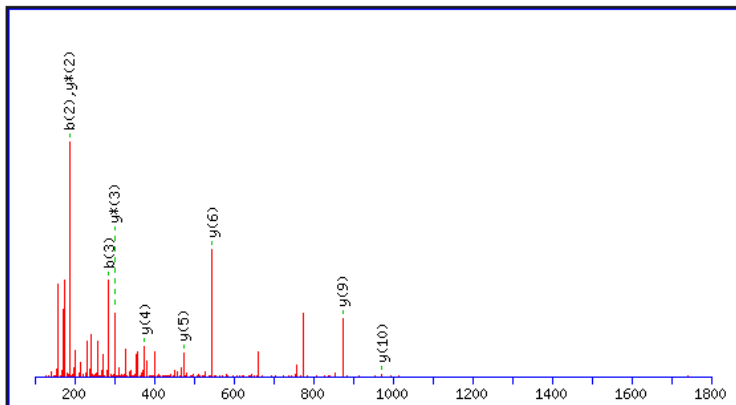

| #         | <b>b</b>      | <b>b<sup>++</sup></b> | <b>b<sup>*</sup></b> | <b>b<sup>*++</sup></b> | <b>b<sup>0</sup></b> | <b>b<sup>0++</sup></b> | Seq.     | <b>y</b>      | <b>y<sup>++</sup></b> | <b>y<sup>*</sup></b> | <b>y<sup>*++</sup></b> | <b>y<sup>0</sup></b> | <b>y<sup>0++</sup></b> | #         |
|-----------|---------------|-----------------------|----------------------|------------------------|----------------------|------------------------|----------|---------------|-----------------------|----------------------|------------------------|----------------------|------------------------|-----------|
| <b>1</b>  | 72.04         | 36.53                 |                      |                        |                      |                        | <b>A</b> |               |                       |                      |                        |                      |                        | <b>12</b> |
| <b>2</b>  | <b>187.07</b> | 94.04                 |                      |                        | 169.06               | 85.03                  | <b>D</b> | 1087.57       | 544.29                | 1070.55              | 535.78                 | 1069.56              | 535.29                 | <b>11</b> |
| <b>3</b>  | <b>286.14</b> | 143.57                |                      |                        | 268.13               | 134.57                 | <b>V</b> | <b>972.55</b> | 486.78                | 955.52               | 478.26                 | 954.54               | 477.77                 | <b>10</b> |
| <b>4</b>  | 399.22        | 200.12                |                      |                        | 381.21               | 191.11                 | <b>L</b> | <b>873.48</b> | 437.24                | 856.45               | 428.73                 | 855.47               | 428.24                 | <b>9</b>  |
| <b>5</b>  | 527.28        | 264.14                | 510.26               | 255.63                 | 509.27               | 255.14                 | <b>Q</b> | 760.39        | 380.70                | 743.37               | 372.19                 | 742.38               | 371.70                 | <b>8</b>  |
| <b>6</b>  | 614.31        | 307.66                | 597.29               | 299.15                 | 596.30               | 298.66                 | <b>S</b> | 632.34        | 316.67                | 615.31               | 308.16                 | 614.33               | 307.67                 | <b>7</b>  |
| <b>7</b>  | 685.35        | 343.18                | 668.32               | 334.67                 | 667.34               | 334.17                 | <b>A</b> | <b>545.30</b> | 273.16                | 528.28               | 264.64                 |                      |                        | <b>6</b>  |
| <b>8</b>  | 784.42        | 392.71                | 767.39               | 384.20                 | 766.41               | 383.71                 | <b>V</b> | <b>474.27</b> | 237.64                | 457.24               | 229.12                 |                      |                        | <b>5</b>  |
| <b>9</b>  | 841.44        | 421.22                | 824.41               | 412.71                 | 823.43               | 412.22                 | <b>G</b> | <b>375.20</b> | 188.10                | 358.17               | 179.59                 |                      |                        | <b>4</b>  |
| <b>10</b> | 955.48        | 478.25                | 938.46               | 469.73                 | 937.47               | 469.24                 | <b>N</b> | 318.18        | 159.59                | <b>301.15</b>        | 151.08                 |                      |                        | <b>3</b>  |
| <b>11</b> | 1012.51       | 506.76                | 995.48               | 498.24                 | 994.50               | 497.75                 | <b>G</b> | 204.13        | 102.57                | <b>187.11</b>        | 94.06                  |                      |                        | <b>2</b>  |
| <b>12</b> |               |                       |                      |                        |                      |                        | <b>K</b> | 147.11        | 74.06                 | 130.09               | 65.55                  |                      |                        | <b>1</b>  |

MS/MS Fragmentation of ID757 **IQADMGLR**

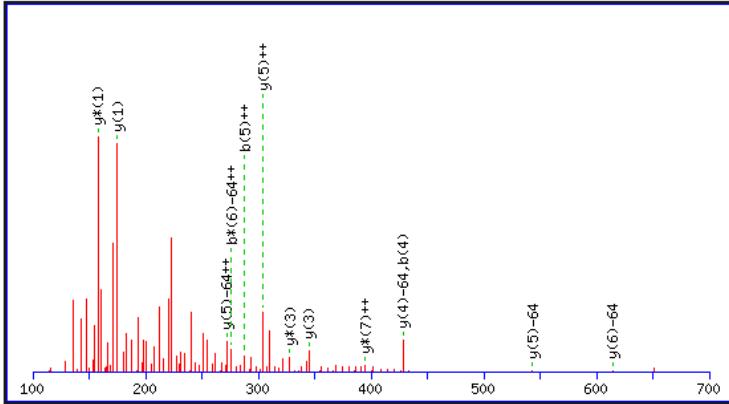

| #        | <b>b</b>      | <b>b<sup>++</sup></b> | <b>b<sup>*</sup></b> | <b>b<sup>*++</sup></b> | <b>b<sup>0</sup></b> | <b>b<sup>0++</sup></b> | Seq.     | <b>y</b>      | <b>y<sup>++</sup></b> | <b>y<sup>*</sup></b> | <b>y<sup>*++</sup></b> | <b>y<sup>0</sup></b> | <b>y<sup>0++</sup></b> | #        |
|----------|---------------|-----------------------|----------------------|------------------------|----------------------|------------------------|----------|---------------|-----------------------|----------------------|------------------------|----------------------|------------------------|----------|
| <b>1</b> | 114.09        | 57.55                 |                      |                        |                      |                        | <b>I</b> |               |                       |                      |                        |                      |                        | <b>8</b> |
| <b>2</b> | 242.15        | 121.58                | 225.12               | 113.07                 |                      |                        | <b>Q</b> | 742.38        | 371.70                | 725.36               | 363.18                 | 724.37               | 362.69                 | <b>7</b> |
| <b>3</b> | 313.19        | 157.10                | 296.16               | 148.58                 |                      |                        | <b>A</b> | <b>614.33</b> | 307.67                | 597.30               | 299.15                 | 596.32               | 298.66                 | <b>6</b> |
| <b>4</b> | <b>428.21</b> | 214.61                | 411.19               | 206.10                 | 410.20               | 205.61                 | <b>D</b> | <b>543.29</b> | <b>272.15</b>         | 526.26               | 263.63                 | 525.28               | 263.14                 | <b>5</b> |
| <b>5</b> | 511.25        | 256.13                | 494.22               | 247.62                 | 493.24               | 247.12                 | <b>M</b> | <b>428.26</b> | 214.63                | 411.24               | 206.12                 |                      |                        | <b>4</b> |
| <b>6</b> | 568.27        | 284.64                | 551.25               | <b>276.13</b>          | 550.26               | 275.63                 | <b>G</b> | <b>345.22</b> | 173.12                | <b>328.20</b>        | 164.60                 |                      |                        | <b>3</b> |
| <b>7</b> | 681.36        | 341.18                | 664.33               | 332.67                 | 663.35               | 332.18                 | <b>L</b> | 288.20        | 144.61                | 271.18               | 136.09                 |                      |                        | <b>2</b> |
| <b>8</b> |               |                       |                      |                        |                      |                        | <b>R</b> | <b>175.12</b> | 88.06                 | <b>158.09</b>        | 79.55                  |                      |                        | <b>1</b> |

MS/MS Fragmentation of ID760 **SLLSDLINLNLSDESTK**

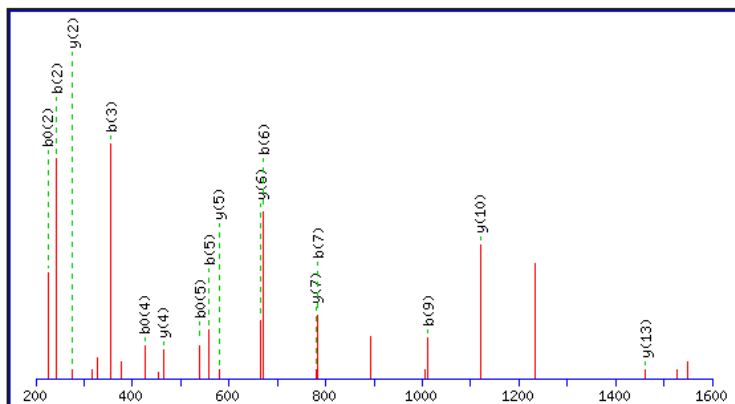

| #  | b              | b <sup>++</sup> | b <sup>*</sup> | b <sup>*++</sup> | b <sup>0</sup> | b <sup>0++</sup> | Seq. | y              | y <sup>++</sup> | y <sup>*</sup> | y <sup>*++</sup> | y <sup>0</sup> | y <sup>0++</sup> | #  |
|----|----------------|-----------------|----------------|------------------|----------------|------------------|------|----------------|-----------------|----------------|------------------|----------------|------------------|----|
| 1  | 130.05         | 65.53           |                |                  | 112.04         | 56.52            | S    |                |                 |                |                  |                |                  | 17 |
| 2  | <b>243.13</b>  | 122.07          |                |                  | <b>225.12</b>  | 113.07           | L    | 1774.94        | 887.98          | 1757.92        | 879.46           | 1756.93        | 878.97           | 16 |
| 3  | <b>356.22</b>  | 178.61          |                |                  | 338.21         | 169.61           | L    | 1661.86        | 831.43          | 1644.83        | 822.92           | 1643.85        | 822.43           | 15 |
| 4  | 443.25         | 222.13          |                |                  | <b>425.24</b>  | 213.12           | S    | 1548.78        | 774.89          | 1531.75        | 766.38           | 1530.76        | 765.89           | 14 |
| 5  | <b>558.28</b>  | 279.64          |                |                  | <b>540.27</b>  | 270.64           | D    | <b>1461.74</b> | 731.38          | 1444.72        | 722.86           | 1443.73        | 722.37           | 13 |
| 6  | <b>671.36</b>  | 336.18          |                |                  | 653.35         | 327.18           | L    | 1346.72        | 673.86          | 1329.69        | 665.35           | 1328.71        | 664.86           | 12 |
| 7  | <b>784.45</b>  | 392.73          |                |                  | 766.43         | 383.72           | I    | 1233.63        | 617.32          | 1216.61        | 608.81           | 1215.62        | 608.31           | 11 |
| 8  | 898.49         | 449.75          | 881.46         | 441.23           | 880.48         | 440.74           | N    | <b>1120.55</b> | 560.78          | 1103.52        | 552.26           | 1102.54        | 551.77           | 10 |
| 9  | <b>1011.57</b> | 506.29          | 994.55         | 497.78           | 993.56         | 497.28           | L    | 1006.51        | 503.76          | 989.48         | 495.24           | 988.49         | 494.75           | 9  |
| 10 | 1125.61        | 563.31          | 1108.59        | 554.80           | 1107.60        | 554.31           | N    | 893.42         | 447.21          | 876.39         | 438.70           | 875.41         | 438.21           | 8  |
| 11 | 1238.70        | 619.85          | 1221.67        | 611.34           | 1220.69        | 610.85           | L    | <b>779.38</b>  | 390.19          | 762.35         | 381.68           | 761.37         | 381.19           | 7  |
| 12 | 1325.73        | 663.37          | 1308.70        | 654.86           | 1307.72        | 654.36           | S    | <b>666.29</b>  | 333.65          | 649.27         | 325.14           | 648.28         | 324.65           | 6  |
| 13 | 1440.76        | 720.88          | 1423.73        | 712.37           | 1422.75        | 711.88           | D    | <b>579.26</b>  | 290.13          | 562.24         | 281.62           | 561.25         | 281.13           | 5  |
| 14 | 1527.79        | 764.40          | 1510.76        | 755.89           | 1509.78        | 755.39           | S    | <b>464.24</b>  | 232.62          | 447.21         | 224.11           | 446.22         | 223.62           | 4  |
| 15 | 1628.84        | 814.92          | 1611.81        | 806.41           | 1610.83        | 805.92           | T    | 377.20         | 189.11          | 360.18         | 180.59           | 359.19         | 180.10           | 3  |
| 16 | 1757.88        | 879.44          | 1740.85        | 870.93           | 1739.87        | 870.44           | E    | <b>276.16</b>  | 138.58          | 259.13         | 130.07           | 258.14         | 129.58           | 2  |
| 17 |                |                 |                |                  |                |                  | K    | 147.11         | 74.06           | 130.09         | 65.55            |                |                  | 1  |

MS/MS Fragmentation of ID763 **EGISAEVINLR**

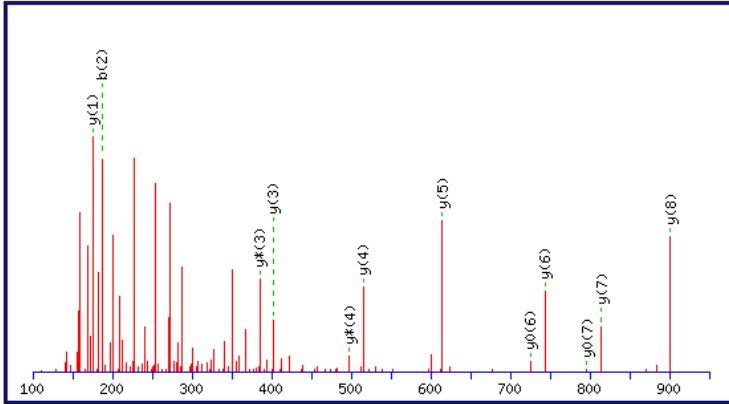

| #         | <b>b</b>      | <b>b<sup>++</sup></b> | <b>b*</b> | <b>b<sup>*++</sup></b> | <b>b<sup>0</sup></b> | <b>b<sup>0++</sup></b> | Seq.     | <b>y</b>      | <b>y<sup>++</sup></b> | <b>y*</b>     | <b>y<sup>*++</sup></b> | <b>y<sup>0</sup></b> | <b>y<sup>0++</sup></b> | #         |
|-----------|---------------|-----------------------|-----------|------------------------|----------------------|------------------------|----------|---------------|-----------------------|---------------|------------------------|----------------------|------------------------|-----------|
| <b>1</b>  | 130.05        | 65.53                 |           |                        | 112.04               | 56.52                  | <b>E</b> |               |                       |               |                        |                      |                        | <b>11</b> |
| <b>2</b>  | <b>187.07</b> | 94.04                 |           |                        | 169.06               | 85.03                  | <b>G</b> | 1071.62       | 536.31                | 1054.59       | 527.80                 | 1053.61              | 527.31                 | <b>10</b> |
| <b>3</b>  | 300.16        | 150.58                |           |                        | 282.14               | 141.58                 | <b>I</b> | 1014.59       | 507.80                | 997.57        | 499.29                 | 996.58               | 498.80                 | <b>9</b>  |
| <b>4</b>  | 387.19        | 194.10                |           |                        | 369.18               | 185.09                 | <b>S</b> | <b>901.51</b> | 451.26                | 884.48        | 442.75                 | 883.50               | 442.25                 | <b>8</b>  |
| <b>5</b>  | 458.22        | 229.62                |           |                        | 440.21               | 220.61                 | <b>A</b> | <b>814.48</b> | 407.74                | 797.45        | 399.23                 | <b>796.47</b>        | 398.74                 | <b>7</b>  |
| <b>6</b>  | 587.27        | 294.14                |           |                        | 569.26               | 285.13                 | <b>E</b> | <b>743.44</b> | 372.22                | 726.41        | 363.71                 | <b>725.43</b>        | 363.22                 | <b>6</b>  |
| <b>7</b>  | 686.34        | 343.67                |           |                        | 668.32               | 334.67                 | <b>V</b> | <b>614.40</b> | 307.70                | 597.37        | 299.19                 |                      |                        | <b>5</b>  |
| <b>8</b>  | 799.42        | 400.21                |           |                        | 781.41               | 391.21                 | <b>I</b> | <b>515.33</b> | 258.17                | <b>498.30</b> | 249.66                 |                      |                        | <b>4</b>  |
| <b>9</b>  | 913.46        | 457.23                | 896.44    | 448.72                 | 895.45               | 448.23                 | <b>N</b> | <b>402.25</b> | 201.63                | <b>385.22</b> | 193.11                 |                      |                        | <b>3</b>  |
| <b>10</b> | 1026.55       | 513.78                | 1009.52   | 505.26                 | 1008.54              | 504.77                 | <b>L</b> | 288.20        | 144.61                | 271.18        | 136.09                 |                      |                        | <b>2</b>  |
| <b>11</b> |               |                       |           |                        |                      |                        | <b>R</b> | <b>175.12</b> | 88.06                 | 158.09        | 79.55                  |                      |                        | <b>1</b>  |

MS/MS Fragmentation of ID764 **GTPNVFIGGK**

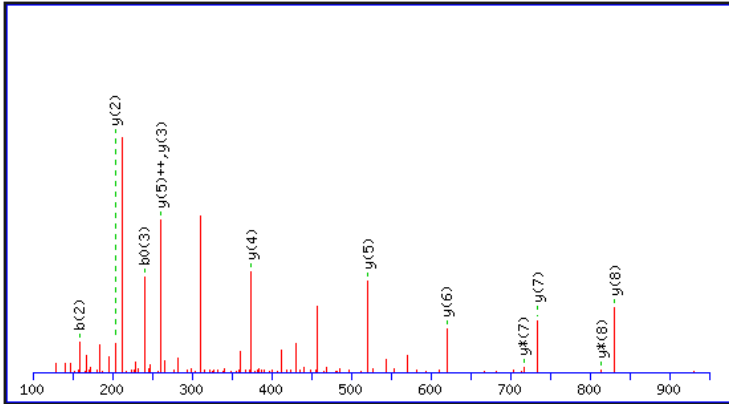

| #  | b             | b <sup>++</sup> | b <sup>*</sup> | b <sup>*++</sup> | b <sup>0</sup> | b <sup>0++</sup> | Seq. | y             | y <sup>++</sup> | y <sup>*</sup> | y <sup>*++</sup> | y <sup>0</sup> | y <sup>0++</sup> | #  |
|----|---------------|-----------------|----------------|------------------|----------------|------------------|------|---------------|-----------------|----------------|------------------|----------------|------------------|----|
| 1  | 58.03         | 29.52           |                |                  |                |                  | G    |               |                 |                |                  |                |                  | 11 |
| 2  | <b>159.08</b> | 80.04           |                |                  | 141.07         | 71.04            | T    | 1031.59       | 516.30          | 1014.56        | 507.78           | 1013.58        | 507.29           | 10 |
| 3  | 258.14        | 129.58          |                |                  | <b>240.13</b>  | 120.57           | V    | 930.54        | 465.77          | 913.51         | 457.26           |                |                  | 9  |
| 4  | 355.20        | 178.10          |                |                  | 337.19         | 169.10           | P    | <b>831.47</b> | 416.24          | <b>814.45</b>  | 407.73           |                |                  | 8  |
| 5  | 469.24        | 235.12          | 452.21         | 226.61           | 451.23         | 226.12           | N    | <b>734.42</b> | 367.71          | <b>717.39</b>  | 359.20           |                |                  | 7  |
| 6  | 568.31        | 284.66          | 551.28         | 276.14           | 550.30         | 275.65           | V    | <b>620.38</b> | 310.69          | 603.35         | 302.18           |                |                  | 6  |
| 7  | 715.38        | 358.19          | 698.35         | 349.68           | 697.37         | 349.19           | F    | <b>521.31</b> | <b>261.16</b>   | 504.28         | 252.64           |                |                  | 5  |
| 8  | 828.46        | 414.73          | 811.43         | 406.22           | 810.45         | 405.73           | I    | <b>374.24</b> | 187.62          | 357.21         | 179.11           |                |                  | 4  |
| 9  | 885.48        | 443.25          | 868.46         | 434.73           | 867.47         | 434.24           | G    | <b>261.16</b> | 131.08          | 244.13         | 122.57           |                |                  | 3  |
| 10 | 942.50        | 471.76          | 925.48         | 463.24           | 924.49         | 462.75           | G    | <b>204.13</b> | 102.57          | 187.11         | 94.06            |                |                  | 2  |
| 11 |               |                 |                |                  |                |                  | K    | 147.11        | 74.06           | 130.09         | 65.55            |                |                  | 1  |

MS/MS Fragmentation of ID765 **TFQGPPHGIQVER**

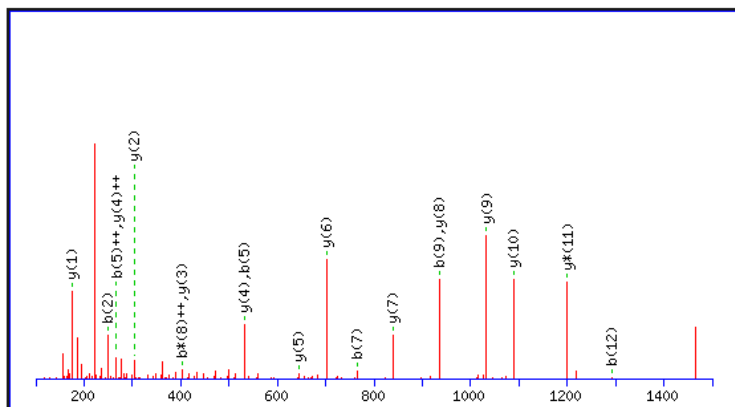

| #  | b              | b <sup>++</sup> | b*      | b <sup>+++</sup> | b <sup>0</sup> | b <sup>0++</sup> | Seq. | y              | y <sup>++</sup> | y*             | y <sup>+++</sup> | y <sup>0</sup> | y <sup>0++</sup> | #  |
|----|----------------|-----------------|---------|------------------|----------------|------------------|------|----------------|-----------------|----------------|------------------|----------------|------------------|----|
| 1  | 102.05         | 51.53           |         |                  | 84.04          | 42.53            | T    |                |                 |                |                  |                |                  | 13 |
| 2  | <b>249.12</b>  | 125.07          |         |                  | 231.11         | 116.06           | F    | 1364.71        | 682.86          | 1347.68        | 674.34           | 1346.70        | 673.85           | 12 |
| 3  | 377.18         | 189.09          | 360.16  | 180.58           | 359.17         | 180.09           | Q    | 1217.64        | 609.32          | <b>1200.61</b> | 600.81           | 1199.63        | 600.32           | 11 |
| 4  | 434.20         | 217.61          | 417.18  | 209.09           | 416.19         | 208.60           | G    | <b>1089.58</b> | 545.29          | 1072.55        | 536.78           | 1071.57        | 536.29           | 10 |
| 5  | <b>531.26</b>  | <b>266.13</b>   | 514.23  | 257.62           | 513.25         | 257.13           | P    | <b>1032.56</b> | 516.78          | 1015.53        | 508.27           | 1014.55        | 507.78           | 9  |
| 6  | 628.31         | 314.66          | 611.28  | 306.14           | 610.30         | 305.65           | P    | <b>935.51</b>  | 468.26          | 918.48         | 459.74           | 917.50         | 459.25           | 8  |
| 7  | <b>765.37</b>  | 383.19          | 748.34  | 374.67           | 747.36         | 374.18           | H    | <b>838.45</b>  | 419.73          | 821.43         | 411.22           | 820.44         | 410.72           | 7  |
| 8  | 822.39         | 411.70          | 805.36  | <b>403.19</b>    | 804.38         | 402.69           | G    | <b>701.39</b>  | 351.20          | 684.37         | 342.69           | 683.38         | 342.20           | 6  |
| 9  | <b>935.47</b>  | 468.24          | 918.45  | 459.73           | 917.46         | 459.24           | I    | <b>644.37</b>  | 322.69          | 627.35         | 314.18           | 626.36         | 313.68           | 5  |
| 10 | 1063.53        | 532.27          | 1046.51 | 523.76           | 1045.52        | 523.26           | Q    | <b>531.29</b>  | <b>266.15</b>   | 514.26         | 257.63           | 513.28         | 257.14           | 4  |
| 11 | 1162.60        | 581.80          | 1145.57 | 573.29           | 1144.59        | 572.80           | V    | <b>403.23</b>  | 202.12          | 386.20         | 193.61           | 385.22         | 193.11           | 3  |
| 12 | <b>1291.64</b> | 646.33          | 1274.62 | 637.81           | 1273.63        | 637.32           | E    | <b>304.16</b>  | 152.58          | 287.13         | 144.07           | 286.15         | 143.58           | 2  |
| 13 |                |                 |         |                  |                |                  | R    | <b>175.12</b>  | 88.06           | 158.09         | 79.55            |                |                  | 1  |

MS/MS Fragmentation of ID766 **TFQGPPHGIQVER**

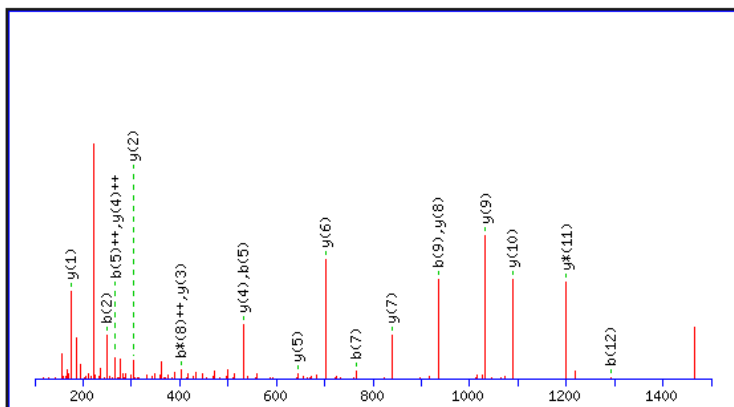

| #  | b              | b <sup>++</sup> | b*      | b <sup>+++</sup> | b <sup>0</sup> | b <sup>0++</sup> | Seq. | y              | y <sup>++</sup> | y*             | y <sup>+++</sup> | y <sup>0</sup> | y <sup>0++</sup> | #  |
|----|----------------|-----------------|---------|------------------|----------------|------------------|------|----------------|-----------------|----------------|------------------|----------------|------------------|----|
| 1  | 102.05         | 51.53           |         |                  | 84.04          | 42.53            | T    |                |                 |                |                  |                |                  | 13 |
| 2  | <b>249.12</b>  | 125.07          |         |                  | 231.11         | 116.06           | F    | 1364.71        | 682.86          | 1347.68        | 674.34           | 1346.70        | 673.85           | 12 |
| 3  | 377.18         | 189.09          | 360.16  | 180.58           | 359.17         | 180.09           | Q    | 1217.64        | 609.32          | <b>1200.61</b> | 600.81           | 1199.63        | 600.32           | 11 |
| 4  | 434.20         | 217.61          | 417.18  | 209.09           | 416.19         | 208.60           | G    | <b>1089.58</b> | 545.29          | 1072.55        | 536.78           | 1071.57        | 536.29           | 10 |
| 5  | <b>531.26</b>  | <b>266.13</b>   | 514.23  | 257.62           | 513.25         | 257.13           | P    | <b>1032.56</b> | 516.78          | 1015.53        | 508.27           | 1014.55        | 507.78           | 9  |
| 6  | 628.31         | 314.66          | 611.28  | 306.14           | 610.30         | 305.65           | P    | <b>935.51</b>  | 468.26          | 918.48         | 459.74           | 917.50         | 459.25           | 8  |
| 7  | <b>765.37</b>  | 383.19          | 748.34  | 374.67           | 747.36         | 374.18           | H    | <b>838.45</b>  | 419.73          | 821.43         | 411.22           | 820.44         | 410.72           | 7  |
| 8  | 822.39         | 411.70          | 805.36  | <b>403.19</b>    | 804.38         | 402.69           | G    | <b>701.39</b>  | 351.20          | 684.37         | 342.69           | 683.38         | 342.20           | 6  |
| 9  | <b>935.47</b>  | 468.24          | 918.45  | 459.73           | 917.46         | 459.24           | I    | <b>644.37</b>  | 322.69          | 627.35         | 314.18           | 626.36         | 313.68           | 5  |
| 10 | 1063.53        | 532.27          | 1046.51 | 523.76           | 1045.52        | 523.26           | Q    | <b>531.29</b>  | <b>266.15</b>   | 514.26         | 257.63           | 513.28         | 257.14           | 4  |
| 11 | 1162.60        | 581.80          | 1145.57 | 573.29           | 1144.59        | 572.80           | V    | <b>403.23</b>  | 202.12          | 386.20         | 193.61           | 385.22         | 193.11           | 3  |
| 12 | <b>1291.64</b> | 646.33          | 1274.62 | 637.81           | 1273.63        | 637.32           | E    | <b>304.16</b>  | 152.58          | 287.13         | 144.07           | 286.15         | 143.58           | 2  |
| 13 |                |                 |         |                  |                |                  | R    | <b>175.12</b>  | 88.06           | 158.09         | 79.55            |                |                  | 1  |



MS/MS Fragmentation of ID767 **I**SELTGLLV**D**K

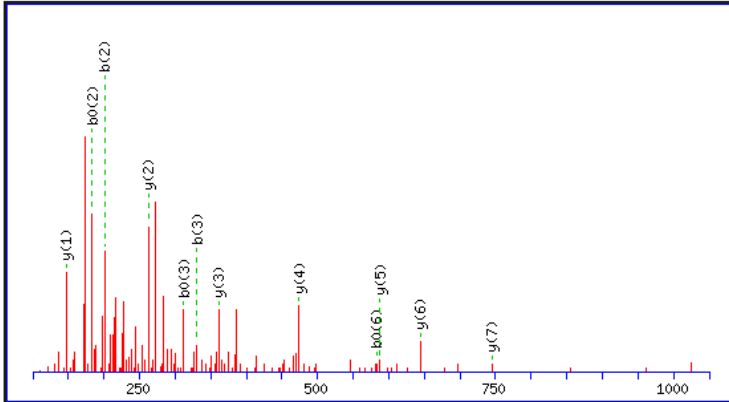

| #         | <b>b</b>      | <b>b<sup>++</sup></b> | <b>b<sup>0</sup></b> | <b>b<sup>0++</sup></b> | Seq.     | <b>y</b>      | <b>y<sup>++</sup></b> | <b>y<sup>*</sup></b> | <b>y<sup>*++</sup></b> | <b>y<sup>0</sup></b> | <b>y<sup>0++</sup></b> | #         |
|-----------|---------------|-----------------------|----------------------|------------------------|----------|---------------|-----------------------|----------------------|------------------------|----------------------|------------------------|-----------|
| <b>1</b>  | 114.09        | 57.55                 |                      |                        | <b>I</b> |               |                       |                      |                        |                      |                        | <b>11</b> |
| <b>2</b>  | <b>201.12</b> | 101.07                | <b>183.11</b>        | 92.06                  | <b>S</b> | 1074.60       | 537.81                | 1057.58              | 529.29                 | 1056.59              | 528.80                 | <b>10</b> |
| <b>3</b>  | <b>330.17</b> | 165.59                | <b>312.16</b>        | 156.58                 | <b>E</b> | 987.57        | 494.29                | 970.55               | 485.78                 | 969.56               | 485.28                 | <b>9</b>  |
| <b>4</b>  | 443.25        | 222.13                | 425.24               | 213.12                 | <b>L</b> | 858.53        | 429.77                | 841.50               | 421.26                 | 840.52               | 420.76                 | <b>8</b>  |
| <b>5</b>  | 544.30        | 272.65                | 526.29               | 263.65                 | <b>T</b> | <b>745.45</b> | 373.23                | 728.42               | 364.71                 | 727.43               | 364.22                 | <b>7</b>  |
| <b>6</b>  | 601.32        | 301.16                | <b>583.31</b>        | 292.16                 | <b>G</b> | <b>644.40</b> | 322.70                | 627.37               | 314.19                 | 626.39               | 313.70                 | <b>6</b>  |
| <b>7</b>  | 714.40        | 357.71                | 696.39               | 348.70                 | <b>L</b> | <b>587.38</b> | 294.19                | 570.35               | 285.68                 | 569.37               | 285.19                 | <b>5</b>  |
| <b>8</b>  | 827.49        | 414.25                | 809.48               | 405.24                 | <b>L</b> | <b>474.29</b> | 237.65                | 457.27               | 229.14                 | 456.28               | 228.64                 | <b>4</b>  |
| <b>9</b>  | 926.56        | 463.78                | 908.55               | 454.78                 | <b>V</b> | <b>361.21</b> | 181.11                | 344.18               | 172.59                 | 343.20               | 172.10                 | <b>3</b>  |
| <b>10</b> | 1041.58       | 521.29                | 1023.57              | 512.29                 | <b>D</b> | <b>262.14</b> | 131.57                | 245.11               | 123.06                 | 244.13               | 122.57                 | <b>2</b>  |
| <b>11</b> |               |                       |                      |                        | <b>K</b> | <b>147.11</b> | 74.06                 | 130.09               | 65.55                  |                      |                        | <b>1</b>  |

MS/MS Fragmentation of ID768 **FSMYFYLPDAK**

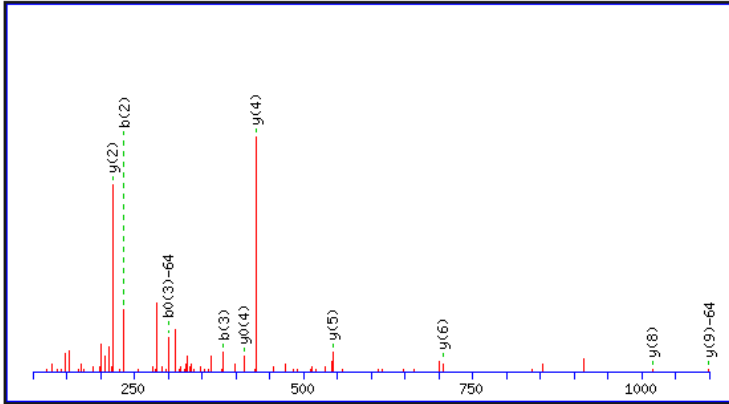

| #         | <b>b</b>      | <b>b<sup>++</sup></b> | <b>b<sup>0</sup></b> | <b>b<sup>0++</sup></b> | Seq.     | <b>y</b>       | <b>y<sup>++</sup></b> | <b>y<sup>*</sup></b> | <b>y<sup>*++</sup></b> | <b>y<sup>0</sup></b> | <b>y<sup>0++</sup></b> | #         |
|-----------|---------------|-----------------------|----------------------|------------------------|----------|----------------|-----------------------|----------------------|------------------------|----------------------|------------------------|-----------|
| <b>1</b>  | 148.08        | 74.54                 |                      |                        | <b>F</b> |                |                       |                      |                        |                      |                        | <b>11</b> |
| <b>2</b>  | <b>235.11</b> | 118.06                | 217.10               | 109.05                 | <b>S</b> | 1186.58        | 593.79                | 1169.55              | 585.28                 | 1168.57              | 584.79                 | <b>10</b> |
| <b>3</b>  | 318.14        | 159.58                | <b>300.13</b>        | 150.57                 | <b>M</b> | <b>1099.55</b> | 550.28                | 1082.52              | 541.76                 | 1081.54              | 541.27                 | <b>9</b>  |
| <b>4</b>  | 481.21        | 241.11                | 463.20               | 232.10                 | <b>Y</b> | <b>1016.51</b> | 508.76                | 999.48               | 500.24                 | 998.50               | 499.75                 | <b>8</b>  |
| <b>5</b>  | 628.28        | 314.64                | 610.27               | 305.64                 | <b>F</b> | 853.45         | 427.23                | 836.42               | 418.71                 | 835.43               | 418.22                 | <b>7</b>  |
| <b>6</b>  | 791.34        | 396.17                | 773.33               | 387.17                 | <b>Y</b> | <b>706.38</b>  | 353.69                | 689.35               | 345.18                 | 688.37               | 344.69                 | <b>6</b>  |
| <b>7</b>  | 904.42        | 452.72                | 886.41               | 443.71                 | <b>L</b> | <b>543.31</b>  | 272.16                | 526.29               | 263.65                 | 525.30               | 263.16                 | <b>5</b>  |
| <b>8</b>  | 1001.48       | 501.24                | 983.47               | 492.24                 | <b>P</b> | <b>430.23</b>  | 215.62                | 413.20               | 207.11                 | <b>412.22</b>        | 206.61                 | <b>4</b>  |
| <b>9</b>  | 1116.50       | 558.76                | 1098.49              | 549.75                 | <b>D</b> | 333.18         | 167.09                | 316.15               | 158.58                 | 315.17               | 158.09                 | <b>3</b>  |
| <b>10</b> | 1187.54       | 594.27                | 1169.53              | 585.27                 | <b>A</b> | <b>218.15</b>  | 109.58                | 201.12               | 101.07                 |                      |                        | <b>2</b>  |
| <b>11</b> |               |                       |                      |                        | <b>K</b> | 147.11         | 74.06                 | 130.09               | 65.55                  |                      |                        | <b>1</b>  |

MS/MS Fragmentation of ID771 **TEGFPGGECK**

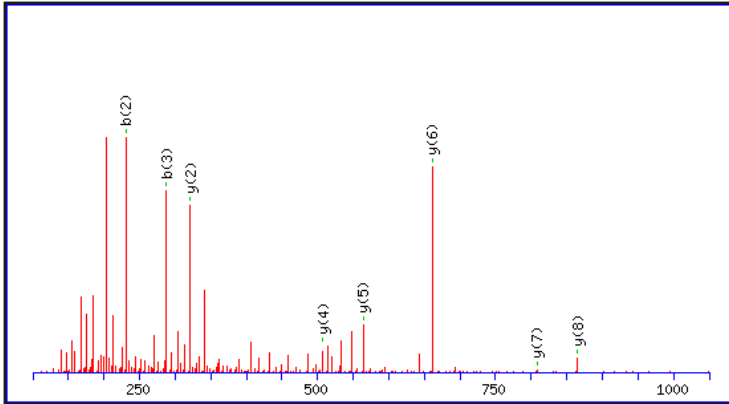

| #         | <b>b</b>      | <b>b<sup>++</sup></b> | <b>b<sup>0</sup></b> | <b>b<sup>0++</sup></b> | Seq.     | <b>y</b>      | <b>y<sup>++</sup></b> | <b>y<sup>*</sup></b> | <b>y<sup>*++</sup></b> | <b>y<sup>0</sup></b> | <b>y<sup>0++</sup></b> | #         |
|-----------|---------------|-----------------------|----------------------|------------------------|----------|---------------|-----------------------|----------------------|------------------------|----------------------|------------------------|-----------|
| <b>1</b>  | 102.05        | 51.53                 | 84.04                | 42.53                  | <b>T</b> |               |                       |                      |                        |                      |                        | <b>10</b> |
| <b>2</b>  | <b>231.10</b> | 116.05                | 213.09               | 107.05                 | <b>E</b> | 994.43        | 497.72                | 977.40               | 489.21                 | 976.42               | 488.71                 | <b>9</b>  |
| <b>3</b>  | <b>288.12</b> | 144.56                | 270.11               | 135.56                 | <b>G</b> | <b>865.39</b> | 433.20                | 848.36               | 424.68                 | 847.38               | 424.19                 | <b>8</b>  |
| <b>4</b>  | 435.19        | 218.10                | 417.18               | 209.09                 | <b>F</b> | <b>808.37</b> | 404.69                | 791.34               | 396.17                 | 790.36               | 395.68                 | <b>7</b>  |
| <b>5</b>  | 532.24        | 266.62                | 514.23               | 257.62                 | <b>P</b> | <b>661.30</b> | 331.15                | 644.27               | 322.64                 | 643.29               | 322.15                 | <b>6</b>  |
| <b>6</b>  | 589.26        | 295.13                | 571.25               | 286.13                 | <b>G</b> | <b>564.24</b> | 282.63                | 547.22               | 274.11                 | 546.23               | 273.62                 | <b>5</b>  |
| <b>7</b>  | 646.28        | 323.65                | 628.27               | 314.64                 | <b>G</b> | <b>507.22</b> | 254.12                | 490.20               | 245.60                 | 489.21               | 245.11                 | <b>4</b>  |
| <b>8</b>  | 775.33        | 388.17                | 757.32               | 379.16                 | <b>E</b> | 450.20        | 225.60                | 433.18               | 217.09                 | 432.19               | 216.60                 | <b>3</b>  |
| <b>9</b>  | 949.37        | 475.19                | 931.36               | 466.18                 | <b>C</b> | <b>321.16</b> | 161.08                | 304.13               | 152.57                 |                      |                        | <b>2</b>  |
| <b>10</b> |               |                       |                      |                        | <b>K</b> | 147.11        | 74.06                 | 130.09               | 65.55                  |                      |                        | <b>1</b>  |

MS/MS Fragmentation of ID774 **ENAILEFAR**

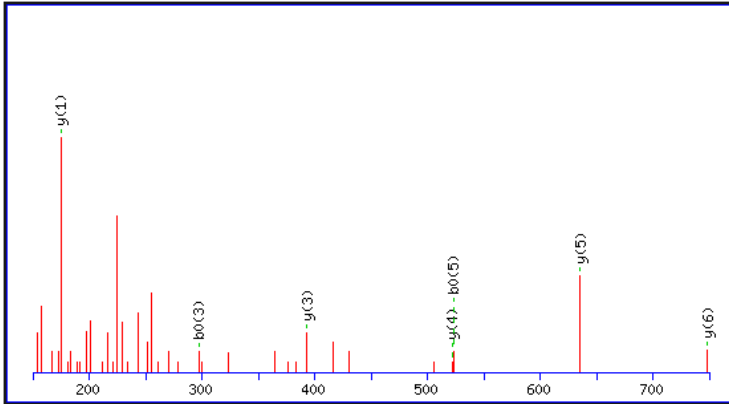

| #        | <b>b</b> | <b>b<sup>++</sup></b> | <b>b<sup>*</sup></b> | <b>b<sup>*++</sup></b> | <b>b<sup>0</sup></b> | <b>b<sup>0++</sup></b> | Seq.     | <b>y</b>      | <b>y<sup>++</sup></b> | <b>y<sup>*</sup></b> | <b>y<sup>*++</sup></b> | <b>y<sup>0</sup></b> | <b>y<sup>0++</sup></b> | #        |
|----------|----------|-----------------------|----------------------|------------------------|----------------------|------------------------|----------|---------------|-----------------------|----------------------|------------------------|----------------------|------------------------|----------|
| <b>1</b> | 130.05   | 65.53                 |                      |                        | 112.04               | 56.52                  | <b>E</b> |               |                       |                      |                        |                      |                        | <b>9</b> |
| <b>2</b> | 244.09   | 122.55                | 227.07               | 114.04                 | 226.08               | 113.54                 | <b>N</b> | 933.52        | 467.26                | 916.49               | 458.75                 | 915.50               | 458.26                 | <b>8</b> |
| <b>3</b> | 315.13   | 158.07                | 298.10               | 149.56                 | <b>297.12</b>        | 149.06                 | <b>A</b> | 819.47        | 410.24                | 802.45               | 401.73                 | 801.46               | 401.23                 | <b>7</b> |
| <b>4</b> | 428.21   | 214.61                | 411.19               | 206.10                 | 410.20               | 205.61                 | <b>I</b> | <b>748.44</b> | 374.72                | 731.41               | 366.21                 | 730.42               | 365.72                 | <b>6</b> |
| <b>5</b> | 541.30   | 271.15                | 524.27               | 262.64                 | <b>523.29</b>        | 262.15                 | <b>L</b> | <b>635.35</b> | 318.18                | 618.32               | 309.67                 | 617.34               | 309.17                 | <b>5</b> |
| <b>6</b> | 670.34   | 335.67                | 653.31               | 327.16                 | 652.33               | 326.67                 | <b>E</b> | <b>522.27</b> | 261.64                | 505.24               | 253.12                 | 504.26               | 252.63                 | <b>4</b> |
| <b>7</b> | 817.41   | 409.21                | 800.38               | 400.69                 | 799.40               | 400.20                 | <b>F</b> | <b>393.22</b> | 197.12                | 376.20               | 188.60                 |                      |                        | <b>3</b> |
| <b>8</b> | 888.45   | 444.73                | 871.42               | 436.21                 | 870.44               | 435.72                 | <b>A</b> | 246.16        | 123.58                | 229.13               | 115.07                 |                      |                        | <b>2</b> |
| <b>9</b> |          |                       |                      |                        |                      |                        | <b>R</b> | <b>175.12</b> | 88.06                 | 158.09               | 79.55                  |                      |                        | <b>1</b> |

MS/MS Fragmentation of ID775 **LAAGWFTAR**

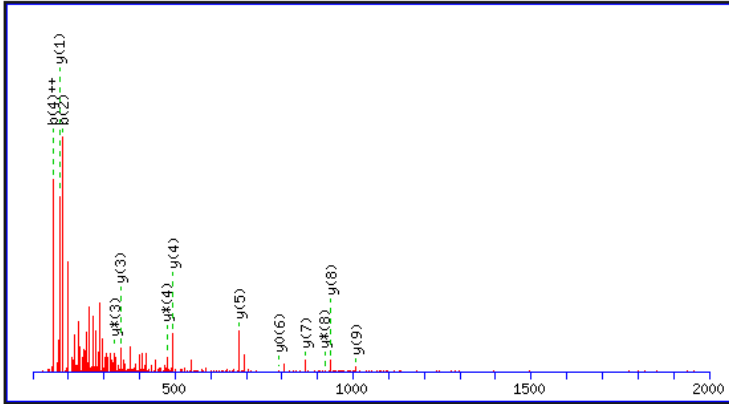

| #         | b             | b <sup>++</sup> | b <sup>0</sup> | b <sup>0++</sup> | Seq.     | y              | y <sup>++</sup> | y <sup>*</sup> | y <sup>*++</sup> | y <sup>0</sup> | y <sup>0++</sup> | #         |
|-----------|---------------|-----------------|----------------|------------------|----------|----------------|-----------------|----------------|------------------|----------------|------------------|-----------|
| <b>1</b>  | 114.09        | 57.55           |                |                  | <b>L</b> |                |                 |                |                  |                |                  | <b>10</b> |
| <b>2</b>  | <b>185.13</b> | 93.07           |                |                  | <b>A</b> | <b>1008.49</b> | 504.75          | 991.46         | 496.24           | 990.48         | 495.74           | <b>9</b>  |
| <b>3</b>  | 256.17        | 128.59          |                |                  | <b>A</b> | <b>937.45</b>  | 469.23          | <b>920.43</b>  | 460.72           | 919.44         | 460.22           | <b>8</b>  |
| <b>4</b>  | 313.19        | <b>157.10</b>   |                |                  | <b>G</b> | <b>866.42</b>  | 433.71          | 849.39         | 425.20           | 848.40         | 424.71           | <b>7</b>  |
| <b>5</b>  | 442.23        | 221.62          | 424.22         | 212.61           | <b>E</b> | 809.39         | 405.20          | 792.37         | 396.69           | <b>791.38</b>  | 396.20           | <b>6</b>  |
| <b>6</b>  | 628.31        | 314.66          | 610.30         | 305.65           | <b>W</b> | <b>680.35</b>  | 340.68          | 663.32         | 332.17           | 662.34         | 331.67           | <b>5</b>  |
| <b>7</b>  | 775.38        | 388.19          | 757.37         | 379.19           | <b>F</b> | <b>494.27</b>  | 247.64          | <b>477.25</b>  | 239.13           | 476.26         | 238.63           | <b>4</b>  |
| <b>8</b>  | 876.43        | 438.72          | 858.41         | 429.71           | <b>T</b> | <b>347.20</b>  | 174.11          | <b>330.18</b>  | 165.59           | 329.19         | 165.10           | <b>3</b>  |
| <b>9</b>  | 947.46        | 474.23          | 929.45         | 465.23           | <b>A</b> | 246.16         | 123.58          | 229.13         | 115.07           |                |                  | <b>2</b>  |
| <b>10</b> |               |                 |                |                  | <b>R</b> | <b>175.12</b>  | 88.06           | 158.09         | 79.55            |                |                  | <b>1</b>  |

MS/MS Fragmentation of ID776 **GIIPSEVLSVLEAK**

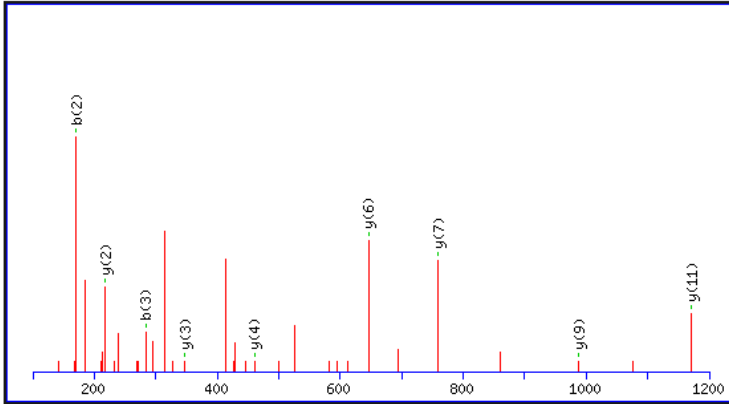

| #         | <b>b</b>      | <b>b<sup>++</sup></b> | <b>b<sup>0</sup></b> | <b>b<sup>0++</sup></b> | Seq.     | <b>y</b>       | <b>y<sup>++</sup></b> | <b>y<sup>*</sup></b> | <b>y<sup>*++</sup></b> | <b>y<sup>0</sup></b> | <b>y<sup>0++</sup></b> | #         |
|-----------|---------------|-----------------------|----------------------|------------------------|----------|----------------|-----------------------|----------------------|------------------------|----------------------|------------------------|-----------|
| <b>1</b>  | 58.03         | 29.52                 |                      |                        | <b>G</b> |                |                       |                      |                        |                      |                        | <b>14</b> |
| <b>2</b>  | <b>171.11</b> | 86.06                 |                      |                        | <b>I</b> | 1397.82        | 699.42                | 1380.80              | 690.90                 | 1379.81              | 690.41                 | <b>13</b> |
| <b>3</b>  | <b>284.20</b> | 142.60                |                      |                        | <b>I</b> | 1284.74        | 642.87                | 1267.71              | 634.36                 | 1266.73              | 633.87                 | <b>12</b> |
| <b>4</b>  | 381.25        | 191.13                |                      |                        | <b>P</b> | <b>1171.66</b> | 586.33                | 1154.63              | 577.82                 | 1153.65              | 577.33                 | <b>11</b> |
| <b>5</b>  | 468.28        | 234.64                | 450.27               | 225.64                 | <b>S</b> | 1074.60        | 537.81                | 1057.58              | 529.29                 | 1056.59              | 528.80                 | <b>10</b> |
| <b>6</b>  | 597.32        | 299.17                | 579.31               | 290.16                 | <b>E</b> | <b>987.57</b>  | 494.29                | 970.55               | 485.78                 | 969.56               | 485.28                 | <b>9</b>  |
| <b>7</b>  | 696.39        | 348.70                | 678.38               | 339.69                 | <b>V</b> | 858.53         | 429.77                | 841.50               | 421.26                 | 840.52               | 420.76                 | <b>8</b>  |
| <b>8</b>  | 809.48        | 405.24                | 791.47               | 396.24                 | <b>L</b> | <b>759.46</b>  | 380.23                | 742.43               | 371.72                 | 741.45               | 371.23                 | <b>7</b>  |
| <b>9</b>  | 896.51        | 448.76                | 878.50               | 439.75                 | <b>S</b> | <b>646.38</b>  | 323.69                | 629.35               | 315.18                 | 628.37               | 314.69                 | <b>6</b>  |
| <b>10</b> | 995.58        | 498.29                | 977.57               | 489.29                 | <b>V</b> | 559.34         | 280.18                | 542.32               | 271.66                 | 541.33               | 271.17                 | <b>5</b>  |
| <b>11</b> | 1108.66       | 554.83                | 1090.65              | 545.83                 | <b>L</b> | <b>460.28</b>  | 230.64                | 443.25               | 222.13                 | 442.27               | 221.64                 | <b>4</b>  |
| <b>12</b> | 1237.70       | 619.36                | 1219.69              | 610.35                 | <b>E</b> | <b>347.19</b>  | 174.10                | 330.17               | 165.59                 | 329.18               | 165.09                 | <b>3</b>  |
| <b>13</b> | 1308.74       | 654.87                | 1290.73              | 645.87                 | <b>A</b> | <b>218.15</b>  | 109.58                | 201.12               | 101.07                 |                      |                        | <b>2</b>  |
| <b>14</b> |               |                       |                      |                        | <b>K</b> | 147.11         | 74.06                 | 130.09               | 65.55                  |                      |                        | <b>1</b>  |

MS/MS Fragmentation of ID777 **ASALAALSSAFNPSSGK**

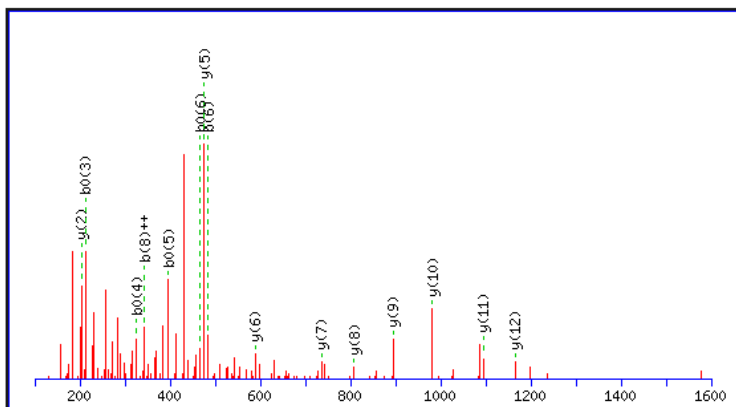

| #  | b       | b <sup>++</sup> | b <sup>*</sup> | b <sup>*++</sup> | b <sup>0</sup> | b <sup>0++</sup> | Seq. | y       | y <sup>++</sup> | y <sup>*</sup> | y <sup>*++</sup> | y <sup>0</sup> | y <sup>0++</sup> | #  |
|----|---------|-----------------|----------------|------------------|----------------|------------------|------|---------|-----------------|----------------|------------------|----------------|------------------|----|
| 1  | 72.04   | 36.53           |                |                  |                |                  | A    |         |                 |                |                  |                |                  | 17 |
| 2  | 159.08  | 80.04           |                |                  | 141.07         | 71.04            | S    | 1507.78 | 754.39          | 1490.75        | 745.88           | 1489.76        | 745.39           | 16 |
| 3  | 230.11  | 115.56          |                |                  | 212.10         | 106.56           | A    | 1420.74 | 710.88          | 1403.72        | 702.36           | 1402.73        | 701.87           | 15 |
| 4  | 343.20  | 172.10          |                |                  | 325.19         | 163.10           | L    | 1349.71 | 675.36          | 1332.68        | 666.84           | 1331.70        | 666.35           | 14 |
| 5  | 414.23  | 207.62          |                |                  | 396.22         | 198.62           | A    | 1236.62 | 618.81          | 1219.60        | 610.30           | 1218.61        | 609.81           | 13 |
| 6  | 485.27  | 243.14          |                |                  | 467.26         | 234.13           | A    | 1165.58 | 583.30          | 1148.56        | 574.78           | 1147.57        | 574.29           | 12 |
| 7  | 598.36  | 299.68          |                |                  | 580.35         | 290.68           | L    | 1094.55 | 547.78          | 1077.52        | 539.26           | 1076.54        | 538.77           | 11 |
| 8  | 685.39  | 343.20          |                |                  | 667.38         | 334.19           | S    | 981.46  | 491.24          | 964.44         | 482.72           | 963.45         | 482.23           | 10 |
| 9  | 772.42  | 386.71          |                |                  | 754.41         | 377.71           | S    | 894.43  | 447.72          | 877.41         | 439.21           | 876.42         | 438.71           | 9  |
| 10 | 843.46  | 422.23          |                |                  | 825.45         | 413.23           | A    | 807.40  | 404.20          | 790.37         | 395.69           | 789.39         | 395.20           | 8  |
| 11 | 990.53  | 495.77          |                |                  | 972.51         | 486.76           | F    | 736.36  | 368.68          | 719.34         | 360.17           | 718.35         | 359.68           | 7  |
| 12 | 1104.57 | 552.79          | 1087.54        | 544.27           | 1086.56        | 543.78           | N    | 589.29  | 295.15          | 572.27         | 286.64           | 571.28         | 286.15           | 6  |
| 13 | 1201.62 | 601.31          | 1184.59        | 592.80           | 1183.61        | 592.31           | P    | 475.25  | 238.13          | 458.22         | 229.62           | 457.24         | 229.12           | 5  |
| 14 | 1288.65 | 644.83          | 1271.63        | 636.32           | 1270.64        | 635.82           | S    | 378.20  | 189.60          | 361.17         | 181.09           | 360.19         | 180.60           | 4  |
| 15 | 1375.69 | 688.35          | 1358.66        | 679.83           | 1357.67        | 679.34           | S    | 291.17  | 146.09          | 274.14         | 137.57           | 273.16         | 137.08           | 3  |
| 16 | 1432.71 | 716.86          | 1415.68        | 708.34           | 1414.70        | 707.85           | G    | 204.13  | 102.57          | 187.11         | 94.06            |                |                  | 2  |
| 17 |         |                 |                |                  |                |                  | K    | 147.11  | 74.06           | 130.09         | 65.55            |                |                  | 1  |

MS/MS Fragmentation of ID778 **ASALAALSSAFNPSSGK**

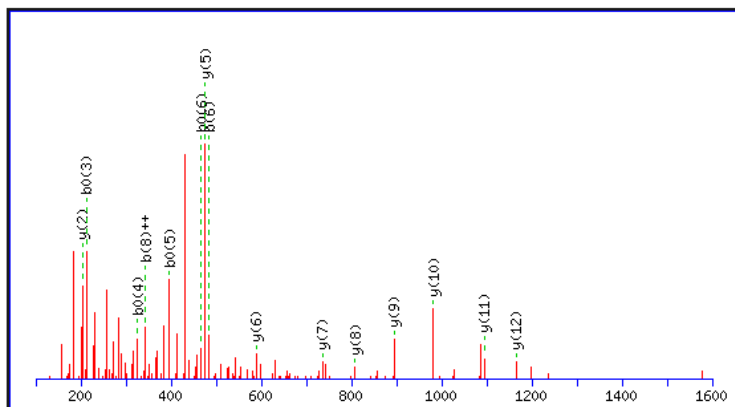

| #  | b       | b <sup>++</sup> | b <sup>*</sup> | b <sup>*++</sup> | b <sup>0</sup> | b <sup>0++</sup> | Seq. | y       | y <sup>++</sup> | y <sup>*</sup> | y <sup>*++</sup> | y <sup>0</sup> | y <sup>0++</sup> | #  |
|----|---------|-----------------|----------------|------------------|----------------|------------------|------|---------|-----------------|----------------|------------------|----------------|------------------|----|
| 1  | 72.04   | 36.53           |                |                  |                |                  | A    |         |                 |                |                  |                |                  | 17 |
| 2  | 159.08  | 80.04           |                |                  | 141.07         | 71.04            | S    | 1507.78 | 754.39          | 1490.75        | 745.88           | 1489.76        | 745.39           | 16 |
| 3  | 230.11  | 115.56          |                |                  | 212.10         | 106.56           | A    | 1420.74 | 710.88          | 1403.72        | 702.36           | 1402.73        | 701.87           | 15 |
| 4  | 343.20  | 172.10          |                |                  | 325.19         | 163.10           | L    | 1349.71 | 675.36          | 1332.68        | 666.84           | 1331.70        | 666.35           | 14 |
| 5  | 414.23  | 207.62          |                |                  | 396.22         | 198.62           | A    | 1236.62 | 618.81          | 1219.60        | 610.30           | 1218.61        | 609.81           | 13 |
| 6  | 485.27  | 243.14          |                |                  | 467.26         | 234.13           | A    | 1165.58 | 583.30          | 1148.56        | 574.78           | 1147.57        | 574.29           | 12 |
| 7  | 598.36  | 299.68          |                |                  | 580.35         | 290.68           | L    | 1094.55 | 547.78          | 1077.52        | 539.26           | 1076.54        | 538.77           | 11 |
| 8  | 685.39  | 343.20          |                |                  | 667.38         | 334.19           | S    | 981.46  | 491.24          | 964.44         | 482.72           | 963.45         | 482.23           | 10 |
| 9  | 772.42  | 386.71          |                |                  | 754.41         | 377.71           | S    | 894.43  | 447.72          | 877.41         | 439.21           | 876.42         | 438.71           | 9  |
| 10 | 843.46  | 422.23          |                |                  | 825.45         | 413.23           | A    | 807.40  | 404.20          | 790.37         | 395.69           | 789.39         | 395.20           | 8  |
| 11 | 990.53  | 495.77          |                |                  | 972.51         | 486.76           | F    | 736.36  | 368.68          | 719.34         | 360.17           | 718.35         | 359.68           | 7  |
| 12 | 1104.57 | 552.79          | 1087.54        | 544.27           | 1086.56        | 543.78           | N    | 589.29  | 295.15          | 572.27         | 286.64           | 571.28         | 286.15           | 6  |
| 13 | 1201.62 | 601.31          | 1184.59        | 592.80           | 1183.61        | 592.31           | P    | 475.25  | 238.13          | 458.22         | 229.62           | 457.24         | 229.12           | 5  |
| 14 | 1288.65 | 644.83          | 1271.63        | 636.32           | 1270.64        | 635.82           | S    | 378.20  | 189.60          | 361.17         | 181.09           | 360.19         | 180.60           | 4  |
| 15 | 1375.69 | 688.35          | 1358.66        | 679.83           | 1357.67        | 679.34           | S    | 291.17  | 146.09          | 274.14         | 137.57           | 273.16         | 137.08           | 3  |
| 16 | 1432.71 | 716.86          | 1415.68        | 708.34           | 1414.70        | 707.85           | G    | 204.13  | 102.57          | 187.11         | 94.06            |                |                  | 2  |
| 17 |         |                 |                |                  |                |                  | K    | 147.11  | 74.06           | 130.09         | 65.55            |                |                  | 1  |



MS/MS Fragmentation of ID780 **DFEPPGSLAPTGLFLGGTK**

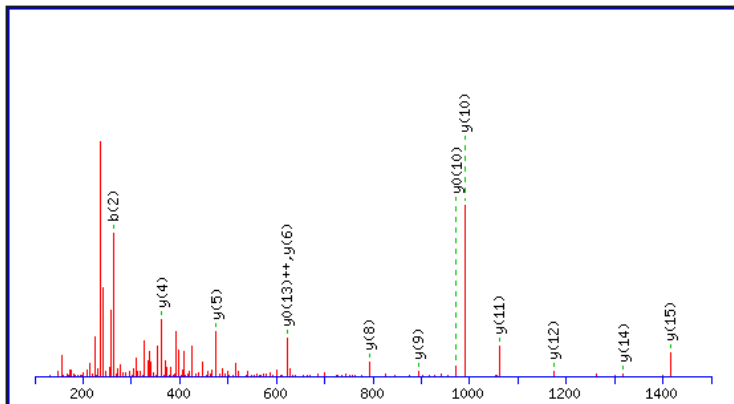

| #  | b             | b <sup>++</sup> | b <sup>0</sup> | b <sup>0++</sup> | Seq. | y              | y <sup>++</sup> | y*      | y <sup>*++</sup> | y <sup>0</sup> | y <sup>0++</sup> | #  |
|----|---------------|-----------------|----------------|------------------|------|----------------|-----------------|---------|------------------|----------------|------------------|----|
| 1  | 116.03        | 58.52           | 98.02          | 49.52            | D    |                |                 |         |                  |                |                  | 19 |
| 2  | <b>263.10</b> | 132.05          | 245.09         | 123.05           | F    | 1820.94        | 910.98          | 1803.92 | 902.46           | 1802.93        | 901.97           | 18 |
| 3  | 392.15        | 196.58          | 374.13         | 187.57           | E    | 1673.87        | 837.44          | 1656.85 | 828.93           | 1655.86        | 828.44           | 17 |
| 4  | 521.19        | 261.10          | 503.18         | 252.09           | E    | 1544.83        | 772.92          | 1527.81 | 764.41           | 1526.82        | 763.91           | 16 |
| 5  | 618.24        | 309.62          | 600.23         | 300.62           | P    | <b>1415.79</b> | 708.40          | 1398.76 | 699.88           | 1397.78        | 699.39           | 15 |
| 6  | 675.26        | 338.13          | 657.25         | 329.13           | G    | <b>1318.74</b> | 659.87          | 1301.71 | 651.36           | 1300.73        | 650.87           | 14 |
| 7  | 762.29        | 381.65          | 744.28         | 372.65           | S    | 1261.72        | 631.36          | 1244.69 | 622.85           | 1243.70        | <b>622.36</b>    | 13 |
| 8  | 875.38        | 438.19          | 857.37         | 429.19           | L    | <b>1174.68</b> | 587.85          | 1157.66 | 579.33           | 1156.67        | 578.84           | 12 |
| 9  | 946.42        | 473.71          | 928.40         | 464.71           | A    | <b>1061.60</b> | 531.30          | 1044.57 | 522.79           | 1043.59        | 522.30           | 11 |
| 10 | 1043.47       | 522.24          | 1025.46        | 513.23           | P    | <b>990.56</b>  | 495.78          | 973.54  | 487.27           | <b>972.55</b>  | 486.78           | 10 |
| 11 | 1144.52       | 572.76          | 1126.51        | 563.76           | T    | <b>893.51</b>  | 447.26          | 876.48  | 438.74           | 875.50         | 438.25           | 9  |
| 12 | 1201.54       | 601.27          | 1183.53        | 592.27           | G    | <b>792.46</b>  | 396.73          | 775.43  | 388.22           | 774.45         | 387.73           | 8  |
| 13 | 1314.62       | 657.81          | 1296.61        | 648.81           | L    | 735.44         | 368.22          | 718.41  | 359.71           | 717.43         | 359.22           | 7  |
| 14 | 1461.69       | 731.35          | 1443.68        | 722.34           | F    | <b>622.36</b>  | 311.68          | 605.33  | 303.17           | 604.35         | 302.68           | 6  |
| 15 | 1574.77       | 787.89          | 1556.76        | 778.89           | L    | <b>475.29</b>  | 238.15          | 458.26  | 229.63           | 457.28         | 229.14           | 5  |
| 16 | 1631.80       | 816.40          | 1613.78        | 807.40           | G    | <b>362.20</b>  | 181.61          | 345.18  | 173.09           | 344.19         | 172.60           | 4  |
| 17 | 1688.82       | 844.91          | 1670.81        | 835.91           | G    | 305.18         | 153.09          | 288.16  | 144.58           | 287.17         | 144.09           | 3  |
| 18 | 1789.86       | 895.44          | 1771.85        | 886.43           | T    | 248.16         | 124.58          | 231.13  | 116.07           | 230.15         | 115.58           | 2  |
| 19 |               |                 |                |                  | K    | 147.11         | 74.06           | 130.09  | 65.55            |                |                  | 1  |

MS/MS Fragmentation of ID781 **IAFVELQR**

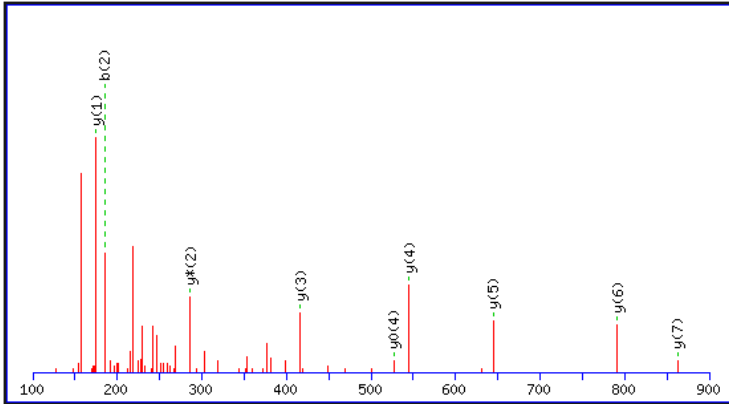

| #        | <b>b</b>      | <b>b<sup>++</sup></b> | <b>b<sup>*</sup></b> | <b>b<sup>*++</sup></b> | <b>b<sup>0</sup></b> | <b>b<sup>0++</sup></b> | Seq.     | <b>y</b>      | <b>y<sup>++</sup></b> | <b>y<sup>*</sup></b> | <b>y<sup>*++</sup></b> | <b>y<sup>0</sup></b> | <b>y<sup>0++</sup></b> | #        |
|----------|---------------|-----------------------|----------------------|------------------------|----------------------|------------------------|----------|---------------|-----------------------|----------------------|------------------------|----------------------|------------------------|----------|
| <b>1</b> | 114.09        | 57.55                 |                      |                        |                      |                        | <b>I</b> |               |                       |                      |                        |                      |                        | <b>8</b> |
| <b>2</b> | <b>185.13</b> | 93.07                 |                      |                        |                      |                        | <b>A</b> | <b>862.48</b> | 431.74                | 845.45               | 423.23                 | 844.47               | 422.74                 | <b>7</b> |
| <b>3</b> | 332.20        | 166.60                |                      |                        |                      |                        | <b>F</b> | <b>791.44</b> | 396.22                | 774.41               | 387.71                 | 773.43               | 387.22                 | <b>6</b> |
| <b>4</b> | 431.27        | 216.14                |                      |                        |                      |                        | <b>V</b> | <b>644.37</b> | 322.69                | 627.35               | 314.18                 | 626.36               | 313.68                 | <b>5</b> |
| <b>5</b> | 560.31        | 280.66                |                      |                        | 542.30               | 271.65                 | <b>E</b> | <b>545.30</b> | 273.16                | 528.28               | 264.64                 | <b>527.29</b>        | 264.15                 | <b>4</b> |
| <b>6</b> | 673.39        | 337.20                |                      |                        | 655.38               | 328.19                 | <b>L</b> | <b>416.26</b> | 208.63                | 399.24               | 200.12                 |                      |                        | <b>3</b> |
| <b>7</b> | 801.45        | 401.23                | 784.42               | 392.72                 | 783.44               | 392.22                 | <b>Q</b> | 303.18        | 152.09                | <b>286.15</b>        | 143.58                 |                      |                        | <b>2</b> |
| <b>8</b> |               |                       |                      |                        |                      |                        | <b>R</b> | <b>175.12</b> | 88.06                 | 158.09               | 79.55                  |                      |                        | <b>1</b> |

MS/MS Fragmentation of ID782 **IFFIAWSPDTSR**

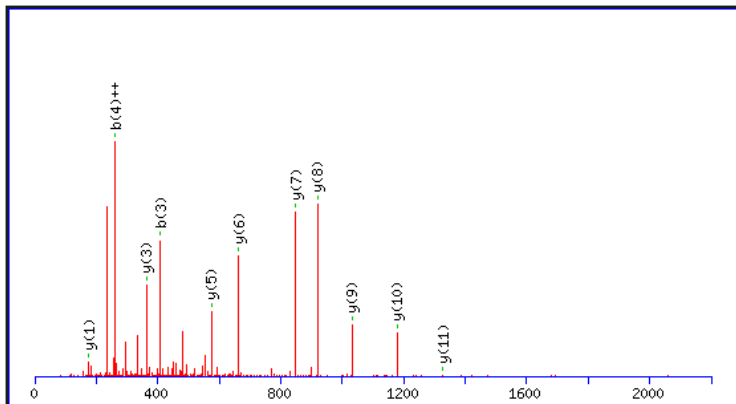

| #         | <b>b</b>      | <b>b<sup>++</sup></b> | <b>b<sup>0</sup></b> | <b>b<sup>0++</sup></b> | Seq.     | <b>y</b>       | <b>y<sup>++</sup></b> | <b>y<sup>*</sup></b> | <b>y<sup>*++</sup></b> | <b>y<sup>0</sup></b> | <b>y<sup>0++</sup></b> | #         |
|-----------|---------------|-----------------------|----------------------|------------------------|----------|----------------|-----------------------|----------------------|------------------------|----------------------|------------------------|-----------|
| <b>1</b>  | 114.09        | 57.55                 |                      |                        | <b>I</b> |                |                       |                      |                        |                      |                        | <b>12</b> |
| <b>2</b>  | <b>261.16</b> | 131.08                |                      |                        | <b>F</b> | <b>1326.65</b> | 663.83                | 1309.62              | 655.31                 | 1308.64              | 654.82                 | <b>11</b> |
| <b>3</b>  | <b>408.23</b> | 204.62                |                      |                        | <b>F</b> | <b>1179.58</b> | 590.29                | 1162.55              | 581.78                 | 1161.57              | 581.29                 | <b>10</b> |
| <b>4</b>  | 521.31        | <b>261.16</b>         |                      |                        | <b>I</b> | <b>1032.51</b> | 516.76                | 1015.48              | 508.25                 | 1014.50              | 507.75                 | <b>9</b>  |
| <b>5</b>  | 592.35        | 296.68                |                      |                        | <b>A</b> | <b>919.43</b>  | 460.22                | 902.40               | 451.70                 | 901.42               | 451.21                 | <b>8</b>  |
| <b>6</b>  | 778.43        | 389.72                |                      |                        | <b>W</b> | <b>848.39</b>  | 424.70                | 831.36               | 416.19                 | 830.38               | 415.69                 | <b>7</b>  |
| <b>7</b>  | 865.46        | 433.23                | 847.45               | 424.23                 | <b>S</b> | <b>662.31</b>  | 331.66                | 645.28               | 323.15                 | 644.30               | 322.65                 | <b>6</b>  |
| <b>8</b>  | 962.51        | 481.76                | 944.50               | 472.76                 | <b>P</b> | <b>575.28</b>  | 288.14                | 558.25               | 279.63                 | 557.27               | 279.14                 | <b>5</b>  |
| <b>9</b>  | 1077.54       | 539.27                | 1059.53              | 530.27                 | <b>D</b> | 478.23         | 239.62                | 461.20               | 231.10                 | 460.22               | 230.61                 | <b>4</b>  |
| <b>10</b> | 1178.59       | 589.80                | 1160.58              | 580.79                 | <b>T</b> | <b>363.20</b>  | 182.10                | 346.17               | 173.59                 | 345.19               | 173.10                 | <b>3</b>  |
| <b>11</b> | 1265.62       | 633.31                | 1247.61              | 624.31                 | <b>S</b> | 262.15         | 131.58                | 245.12               | 123.07                 | 244.14               | 122.57                 | <b>2</b>  |
| <b>12</b> |               |                       |                      |                        | <b>R</b> | <b>175.12</b>  | 88.06                 | 158.09               | 79.55                  |                      |                        | <b>1</b>  |

MS/MS Fragmentation of ID791 **ALPNQQTVDYPSFK**

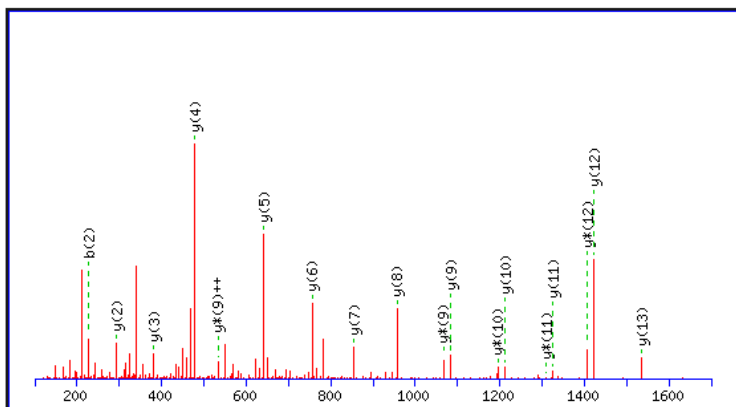

| #         | b             | b <sup>++</sup> | b <sup>*</sup> | b <sup>*++</sup> | b <sup>0</sup> | b <sup>0++</sup> | Seq.     | y              | y <sup>++</sup> | y <sup>*</sup> | y <sup>*++</sup> | y <sup>0</sup> | y <sup>0++</sup> | #         |
|-----------|---------------|-----------------|----------------|------------------|----------------|------------------|----------|----------------|-----------------|----------------|------------------|----------------|------------------|-----------|
| <b>1</b>  | 114.05        | 57.53           |                |                  |                |                  | <b>A</b> |                |                 |                |                  |                |                  | <b>14</b> |
| <b>2</b>  | <b>227.14</b> | 114.07          |                |                  |                |                  | <b>L</b> | <b>1536.77</b> | 768.89          | 1519.74        | 760.37           | 1518.76        | 759.88           | <b>13</b> |
| <b>3</b>  | 324.19        | 162.60          |                |                  |                |                  | <b>P</b> | <b>1423.69</b> | 712.35          | <b>1406.66</b> | 703.83           | 1405.67        | 703.34           | <b>12</b> |
| <b>4</b>  | 438.23        | 219.62          | 421.21         | 211.11           |                |                  | <b>N</b> | <b>1326.63</b> | 663.82          | <b>1309.61</b> | 655.31           | 1308.62        | 654.81           | <b>11</b> |
| <b>5</b>  | 566.29        | 283.65          | 549.27         | 275.14           |                |                  | <b>Q</b> | <b>1212.59</b> | 606.80          | <b>1195.56</b> | 598.29           | 1194.58        | 597.79           | <b>10</b> |
| <b>6</b>  | 694.35        | 347.68          | 677.33         | 339.17           |                |                  | <b>Q</b> | <b>1084.53</b> | 542.77          | <b>1067.50</b> | <b>534.26</b>    | 1066.52        | 533.76           | <b>9</b>  |
| <b>7</b>  | 795.40        | 398.20          | 778.37         | 389.69           | 777.39         | 389.20           | <b>T</b> | <b>956.47</b>  | 478.74          | 939.45         | 470.23           | 938.46         | 469.73           | <b>8</b>  |
| <b>8</b>  | 894.47        | 447.74          | 877.44         | 439.22           | 876.46         | 438.73           | <b>V</b> | <b>855.42</b>  | 428.22          | 838.40         | 419.70           | 837.41         | 419.21           | <b>7</b>  |
| <b>9</b>  | 1009.49       | 505.25          | 992.47         | 496.74           | 991.48         | 496.25           | <b>D</b> | <b>756.36</b>  | 378.68          | 739.33         | 370.17           | 738.35         | 369.68           | <b>6</b>  |
| <b>10</b> | 1172.56       | 586.78          | 1155.53        | 578.27           | 1154.55        | 577.78           | <b>Y</b> | <b>641.33</b>  | 321.17          | 624.30         | 312.66           | 623.32         | 312.16           | <b>5</b>  |
| <b>11</b> | 1269.61       | 635.31          | 1252.58        | 626.80           | 1251.60        | 626.30           | <b>P</b> | <b>478.27</b>  | 239.64          | 461.24         | 231.12           | 460.26         | 230.63           | <b>4</b>  |
| <b>12</b> | 1356.64       | 678.83          | 1339.62        | 670.31           | 1338.63        | 669.82           | <b>S</b> | <b>381.21</b>  | 191.11          | 364.19         | 182.60           | 363.20         | 182.10           | <b>3</b>  |
| <b>13</b> | 1503.71       | 752.36          | 1486.68        | 743.85           | 1485.70        | 743.35           | <b>F</b> | <b>294.18</b>  | 147.59          | 277.15         | 139.08           |                |                  | <b>2</b>  |
| <b>14</b> |               |                 |                |                  |                |                  | <b>K</b> | 147.11         | 74.06           | 130.09         | 65.55            |                |                  | <b>1</b>  |

MS/MS Fragmentation of ID793 **FTNFVEFR**

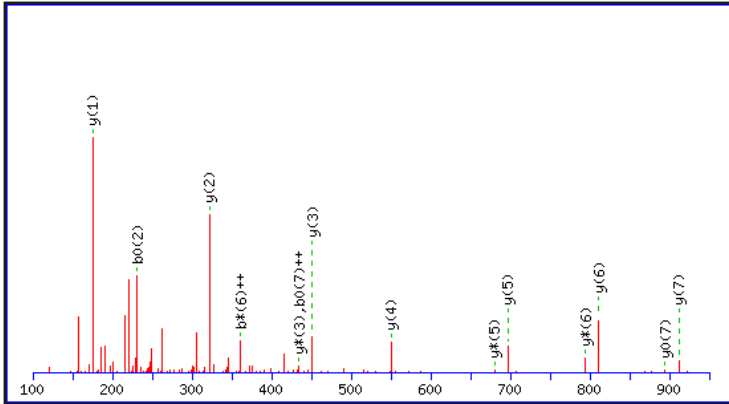

| #        | <b>b</b> | <b>b<sup>++</sup></b> | <b>b<sup>*</sup></b> | <b>b<sup>*++</sup></b> | <b>b<sup>0</sup></b> | <b>b<sup>0++</sup></b> | Seq.     | <b>y</b>      | <b>y<sup>++</sup></b> | <b>y<sup>*</sup></b> | <b>y<sup>*++</sup></b> | <b>y<sup>0</sup></b> | <b>y<sup>0++</sup></b> | #        |
|----------|----------|-----------------------|----------------------|------------------------|----------------------|------------------------|----------|---------------|-----------------------|----------------------|------------------------|----------------------|------------------------|----------|
| <b>1</b> | 148.08   | 74.54                 |                      |                        |                      |                        | <b>F</b> |               |                       |                      |                        |                      |                        | <b>8</b> |
| <b>2</b> | 249.12   | 125.07                |                      |                        | <b>231.11</b>        | 116.06                 | <b>T</b> | <b>912.46</b> | 456.73                | 895.43               | 448.22                 | <b>894.45</b>        | 447.73                 | <b>7</b> |
| <b>3</b> | 363.17   | 182.09                | 346.14               | 173.57                 | 345.16               | 173.08                 | <b>N</b> | <b>811.41</b> | 406.21                | <b>794.38</b>        | 397.70                 | 793.40               | 397.20                 | <b>6</b> |
| <b>4</b> | 510.23   | 255.62                | 493.21               | 247.11                 | 492.22               | 246.62                 | <b>F</b> | <b>697.37</b> | 349.19                | <b>680.34</b>        | 340.67                 | 679.36               | 340.18                 | <b>5</b> |
| <b>5</b> | 609.30   | 305.16                | 592.28               | 296.64                 | 591.29               | 296.15                 | <b>V</b> | <b>550.30</b> | 275.65                | 533.27               | 267.14                 | 532.29               | 266.65                 | <b>4</b> |
| <b>6</b> | 738.35   | 369.68                | 721.32               | <b>361.16</b>          | 720.34               | 360.67                 | <b>E</b> | <b>451.23</b> | 226.12                | <b>434.20</b>        | 217.61                 | 433.22               | 217.11                 | <b>3</b> |
| <b>7</b> | 885.41   | 443.21                | 868.39               | 434.70                 | 867.40               | <b>434.21</b>          | <b>F</b> | <b>322.19</b> | 161.60                | 305.16               | 153.08                 |                      |                        | <b>2</b> |
| <b>8</b> |          |                       |                      |                        |                      |                        | <b>R</b> | <b>175.12</b> | 88.06                 | 158.09               | 79.55                  |                      |                        | <b>1</b> |

MS/MS Fragmentation of ID794 **NILLDSEGK**

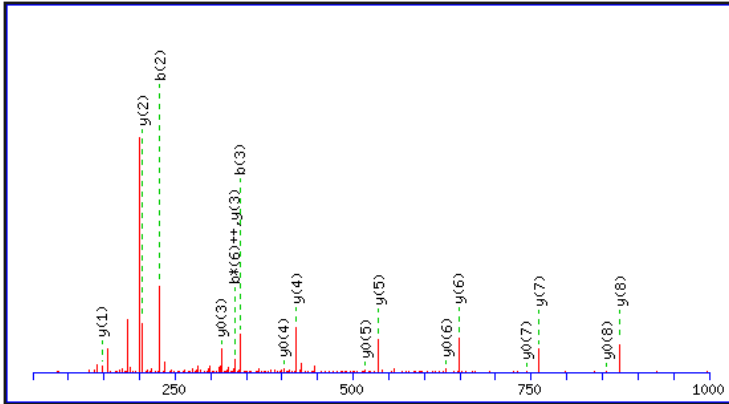

| #         | <b>b</b>      | <b>b<sup>++</sup></b> | <b>b<sup>*</sup></b> | <b>b<sup>*++</sup></b> | <b>b<sup>0</sup></b> | <b>b<sup>0++</sup></b> | Seq.     | <b>y</b>      | <b>y<sup>++</sup></b> | <b>y<sup>*</sup></b> | <b>y<sup>*++</sup></b> | <b>y<sup>0</sup></b> | <b>y<sup>0++</sup></b> | #         |
|-----------|---------------|-----------------------|----------------------|------------------------|----------------------|------------------------|----------|---------------|-----------------------|----------------------|------------------------|----------------------|------------------------|-----------|
| <b>1</b>  | 115.05        | 58.03                 | 98.02                | 49.52                  |                      |                        | <b>N</b> |               |                       |                      |                        |                      |                        | <b>10</b> |
| <b>2</b>  | <b>228.13</b> | 114.57                | 211.11               | 106.06                 |                      |                        | <b>I</b> | 987.57        | 494.29                | 970.55               | 485.78                 | 969.56               | 485.28                 | <b>9</b>  |
| <b>3</b>  | <b>341.22</b> | 171.11                | 324.19               | 162.60                 |                      |                        | <b>L</b> | <b>874.49</b> | 437.75                | 857.46               | 429.23                 | <b>856.48</b>        | 428.74                 | <b>8</b>  |
| <b>4</b>  | 454.30        | 227.65                | 437.28               | 219.14                 |                      |                        | <b>L</b> | <b>761.40</b> | 381.21                | 744.38               | 372.69                 | <b>743.39</b>        | 372.20                 | <b>7</b>  |
| <b>5</b>  | 567.39        | 284.20                | 550.36               | 275.68                 |                      |                        | <b>L</b> | <b>648.32</b> | 324.66                | 631.29               | 316.15                 | <b>630.31</b>        | 315.66                 | <b>6</b>  |
| <b>6</b>  | 682.41        | 341.71                | 665.39               | <b>333.20</b>          | 664.40               | 332.71                 | <b>D</b> | <b>535.24</b> | 268.12                | 518.21               | 259.61                 | <b>517.23</b>        | 259.12                 | <b>5</b>  |
| <b>7</b>  | 769.45        | 385.23                | 752.42               | 376.71                 | 751.43               | 376.22                 | <b>S</b> | <b>420.21</b> | 210.61                | 403.18               | 202.09                 | <b>402.20</b>        | 201.60                 | <b>4</b>  |
| <b>8</b>  | 898.49        | 449.75                | 881.46               | 441.23                 | 880.48               | 440.74                 | <b>E</b> | <b>333.18</b> | 167.09                | 316.15               | 158.58                 | <b>315.17</b>        | 158.09                 | <b>3</b>  |
| <b>9</b>  | 955.51        | 478.26                | 938.48               | 469.75                 | 937.50               | 469.25                 | <b>G</b> | <b>204.13</b> | 102.57                | 187.11               | 94.06                  |                      |                        | <b>2</b>  |
| <b>10</b> |               |                       |                      |                        |                      |                        | <b>K</b> | <b>147.11</b> | 74.06                 | 130.09               | 65.55                  |                      |                        | <b>1</b>  |

MS/MS Fragmentation of ID795 **QSNILEDLDTLR**

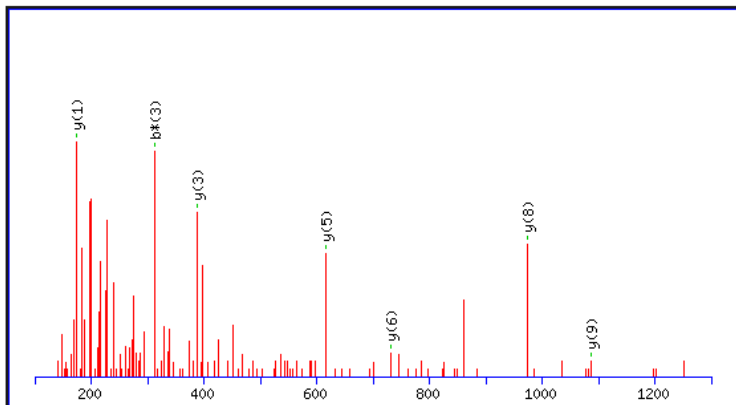

| #         | <b>b</b> | <b>b<sup>++</sup></b> | <b>b*</b>     | <b>b<sup>*++</sup></b> | <b>b<sup>0</sup></b> | <b>b<sup>0++</sup></b> | Seq.     | <b>y</b>       | <b>y<sup>++</sup></b> | <b>y*</b> | <b>y<sup>*++</sup></b> | <b>y<sup>0</sup></b> | <b>y<sup>0++</sup></b> | #         |
|-----------|----------|-----------------------|---------------|------------------------|----------------------|------------------------|----------|----------------|-----------------------|-----------|------------------------|----------------------|------------------------|-----------|
| <b>1</b>  | 129.07   | 65.04                 | 112.04        | 56.52                  |                      |                        | <b>Q</b> |                |                       |           |                        |                      |                        | <b>12</b> |
| <b>2</b>  | 216.10   | 108.55                | 199.07        | 100.04                 | 198.09               | 99.55                  | <b>S</b> | 1288.67        | 644.84                | 1271.65   | 636.33                 | 1270.66              | 635.84                 | <b>11</b> |
| <b>3</b>  | 330.14   | 165.57                | <b>313.11</b> | 157.06                 | 312.13               | 156.57                 | <b>N</b> | 1201.64        | 601.32                | 1184.62   | 592.81                 | 1183.63              | 592.32                 | <b>10</b> |
| <b>4</b>  | 443.22   | 222.12                | 426.20        | 213.60                 | 425.21               | 213.11                 | <b>I</b> | <b>1087.60</b> | 544.30                | 1070.57   | 535.79                 | 1069.59              | 535.30                 | <b>9</b>  |
| <b>5</b>  | 556.31   | 278.66                | 539.28        | 270.14                 | 538.30               | 269.65                 | <b>L</b> | <b>974.52</b>  | 487.76                | 957.49    | 479.25                 | 956.50               | 478.76                 | <b>8</b>  |
| <b>6</b>  | 685.35   | 343.18                | 668.32        | 334.67                 | 667.34               | 334.17                 | <b>E</b> | 861.43         | 431.22                | 844.40    | 422.71                 | 843.42               | 422.21                 | <b>7</b>  |
| <b>7</b>  | 800.38   | 400.69                | 783.35        | 392.18                 | 782.37               | 391.69                 | <b>D</b> | <b>732.39</b>  | 366.70                | 715.36    | 358.18                 | 714.38               | 357.69                 | <b>6</b>  |
| <b>8</b>  | 913.46   | 457.23                | 896.44        | 448.72                 | 895.45               | 448.23                 | <b>L</b> | <b>617.36</b>  | 309.18                | 600.34    | 300.67                 | 599.35               | 300.18                 | <b>5</b>  |
| <b>9</b>  | 1028.49  | 514.75                | 1011.46       | 506.24                 | 1010.48              | 505.74                 | <b>D</b> | 504.28         | 252.64                | 487.25    | 244.13                 | 486.27               | 243.64                 | <b>4</b>  |
| <b>10</b> | 1129.54  | 565.27                | 1112.51       | 556.76                 | 1111.53              | 556.27                 | <b>T</b> | <b>389.25</b>  | 195.13                | 372.22    | 186.62                 | 371.24               | 186.12                 | <b>3</b>  |
| <b>11</b> | 1242.62  | 621.81                | 1225.59       | 613.30                 | 1224.61              | 612.81                 | <b>L</b> | 288.20         | 144.61                | 271.18    | 136.09                 |                      |                        | <b>2</b>  |
| <b>12</b> |          |                       |               |                        |                      |                        | <b>R</b> | <b>175.12</b>  | 88.06                 | 158.09    | 79.55                  |                      |                        | <b>1</b>  |

MS/MS Fragmentation of ID796 **ITEGVNLPFR**

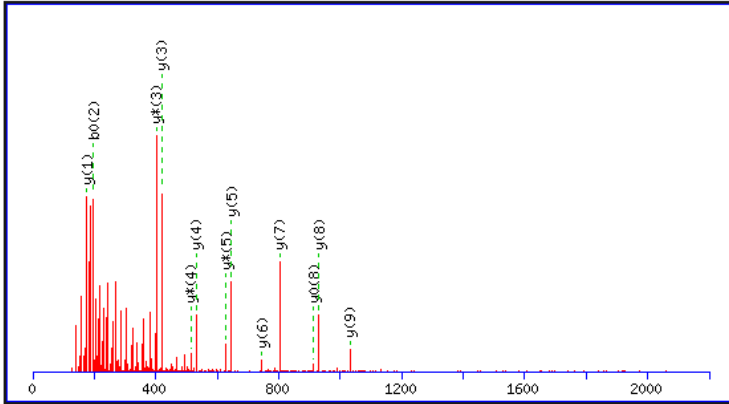

| #         | <b>b</b> | <b>b<sup>++</sup></b> | <b>b<sup>*</sup></b> | <b>b<sup>+++</sup></b> | <b>b<sup>0</sup></b> | <b>b<sup>0++</sup></b> | Seq.     | <b>y</b>       | <b>y<sup>++</sup></b> | <b>y<sup>*</sup></b> | <b>y<sup>+++</sup></b> | <b>y<sup>0</sup></b> | <b>y<sup>0++</sup></b> | #         |
|-----------|----------|-----------------------|----------------------|------------------------|----------------------|------------------------|----------|----------------|-----------------------|----------------------|------------------------|----------------------|------------------------|-----------|
| <b>1</b>  | 114.09   | 57.55                 |                      |                        |                      |                        | <b>I</b> |                |                       |                      |                        |                      |                        | <b>10</b> |
| <b>2</b>  | 215.14   | 108.07                |                      |                        | <b>197.13</b>        | 99.07                  | <b>T</b> | <b>1032.55</b> | 516.78                | 1015.52              | 508.26                 | 1014.54              | 507.77                 | <b>9</b>  |
| <b>3</b>  | 344.18   | 172.59                |                      |                        | 326.17               | 163.59                 | <b>E</b> | <b>931.50</b>  | 466.25                | 914.47               | 457.74                 | <b>913.49</b>        | 457.25                 | <b>8</b>  |
| <b>4</b>  | 401.20   | 201.11                |                      |                        | 383.19               | 192.10                 | <b>G</b> | <b>802.46</b>  | 401.73                | 785.43               | 393.22                 |                      |                        | <b>7</b>  |
| <b>5</b>  | 500.27   | 250.64                |                      |                        | 482.26               | 241.63                 | <b>V</b> | <b>745.44</b>  | 373.22                | 728.41               | 364.71                 |                      |                        | <b>6</b>  |
| <b>6</b>  | 614.31   | 307.66                | 597.29               | 299.15                 | 596.30               | 298.66                 | <b>N</b> | <b>646.37</b>  | 323.69                | <b>629.34</b>        | 315.17                 |                      |                        | <b>5</b>  |
| <b>7</b>  | 727.40   | 364.20                | 710.37               | 355.69                 | 709.39               | 355.20                 | <b>L</b> | <b>532.32</b>  | 266.67                | <b>515.30</b>        | 258.15                 |                      |                        | <b>4</b>  |
| <b>8</b>  | 824.45   | 412.73                | 807.42               | 404.22                 | 806.44               | 403.72                 | <b>P</b> | <b>419.24</b>  | 210.12                | <b>402.21</b>        | 201.61                 |                      |                        | <b>3</b>  |
| <b>9</b>  | 971.52   | 486.26                | 954.49               | 477.75                 | 953.51               | 477.26                 | <b>F</b> | 322.19         | 161.60                | 305.16               | 153.08                 |                      |                        | <b>2</b>  |
| <b>10</b> |          |                       |                      |                        |                      |                        | <b>R</b> | <b>175.12</b>  | 88.06                 | 158.09               | 79.55                  |                      |                        | <b>1</b>  |



MS/MS Fragmentation of ID806 **LNVAIEATLSR**

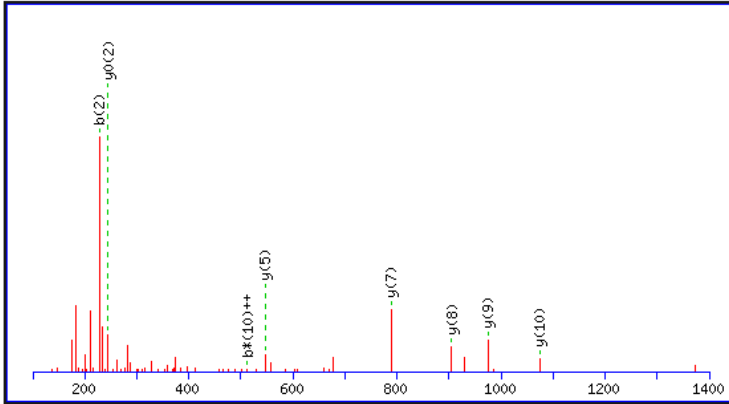

| #         | <b>b</b>      | <b>b<sup>++</sup></b> | <b>b<sup>*</sup></b> | <b>b<sup>*++</sup></b> | <b>b<sup>0</sup></b> | <b>b<sup>0++</sup></b> | Seq.     | <b>y</b>       | <b>y<sup>++</sup></b> | <b>y<sup>*</sup></b> | <b>y<sup>*++</sup></b> | <b>y<sup>0</sup></b> | <b>y<sup>0++</sup></b> | #         |
|-----------|---------------|-----------------------|----------------------|------------------------|----------------------|------------------------|----------|----------------|-----------------------|----------------------|------------------------|----------------------|------------------------|-----------|
| <b>1</b>  | 114.09        | 57.55                 |                      |                        |                      |                        | <b>L</b> |                |                       |                      |                        |                      |                        | <b>12</b> |
| <b>2</b>  | <b>228.13</b> | 114.57                | 211.11               | 106.06                 |                      |                        | <b>N</b> | 1188.62        | 594.81                | 1171.60              | 586.30                 | 1170.61              | 585.81                 | <b>11</b> |
| <b>3</b>  | 327.20        | 164.10                | 310.18               | 155.59                 |                      |                        | <b>V</b> | <b>1074.58</b> | 537.79                | 1057.55              | 529.28                 | 1056.57              | 528.79                 | <b>10</b> |
| <b>4</b>  | 398.24        | 199.62                | 381.21               | 191.11                 |                      |                        | <b>A</b> | <b>975.51</b>  | 488.26                | 958.48               | 479.75                 | 957.50               | 479.25                 | <b>9</b>  |
| <b>5</b>  | 513.27        | 257.14                | 496.24               | 248.62                 | 495.26               | 248.13                 | <b>D</b> | <b>904.47</b>  | 452.74                | 887.45               | 444.23                 | 886.46               | 443.74                 | <b>8</b>  |
| <b>6</b>  | 626.35        | 313.68                | 609.32               | 305.17                 | 608.34               | 304.67                 | <b>I</b> | <b>789.45</b>  | 395.23                | 772.42               | 386.71                 | 771.44               | 386.22                 | <b>7</b>  |
| <b>7</b>  | 755.39        | 378.20                | 738.37               | 369.69                 | 737.38               | 369.20                 | <b>E</b> | 676.36         | 338.68                | 659.34               | 330.17                 | 658.35               | 329.68                 | <b>6</b>  |
| <b>8</b>  | 826.43        | 413.72                | 809.40               | 405.21                 | 808.42               | 404.71                 | <b>A</b> | <b>547.32</b>  | 274.16                | 530.29               | 265.65                 | 529.31               | 265.16                 | <b>5</b>  |
| <b>9</b>  | 927.48        | 464.24                | 910.45               | 455.73                 | 909.47               | 455.24                 | <b>T</b> | 476.28         | 238.64                | 459.26               | 230.13                 | 458.27               | 229.64                 | <b>4</b>  |
| <b>10</b> | 1040.56       | 520.78                | 1023.54              | <b>512.27</b>          | 1022.55              | 511.78                 | <b>L</b> | 375.24         | 188.12                | 358.21               | 179.61                 | 357.22               | 179.12                 | <b>3</b>  |
| <b>11</b> | 1127.59       | 564.30                | 1110.57              | 555.79                 | 1109.58              | 555.30                 | <b>S</b> | 262.15         | 131.58                | 245.12               | 123.07                 | <b>244.14</b>        | 122.57                 | <b>2</b>  |
| <b>12</b> |               |                       |                      |                        |                      |                        | <b>R</b> | 175.12         | 88.06                 | 158.09               | 79.55                  |                      |                        | <b>1</b>  |

MS/MS Fragmentation of ID808 **LTSVFGGAAEPPR**

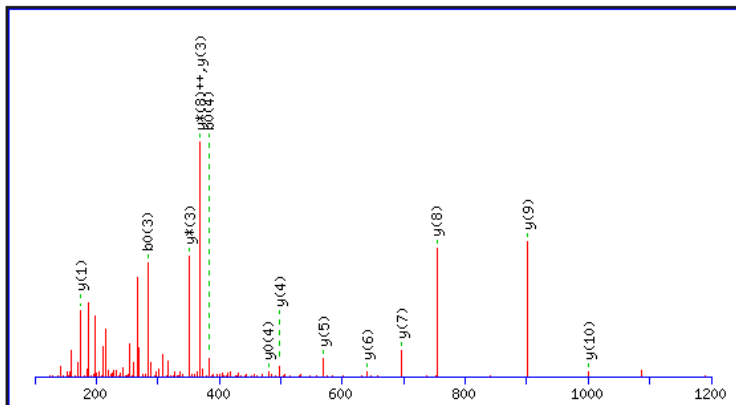

| #         | b       | b <sup>++</sup> | b <sup>0</sup> | b <sup>0++</sup> | Seq.     | y              | y <sup>++</sup> | y <sup>*</sup> | y <sup>*++</sup> | y <sup>0</sup> | y <sup>0++</sup> | #         |
|-----------|---------|-----------------|----------------|------------------|----------|----------------|-----------------|----------------|------------------|----------------|------------------|-----------|
| <b>1</b>  | 114.09  | 57.55           |                |                  | <b>L</b> |                |                 |                |                  |                |                  | <b>13</b> |
| <b>2</b>  | 215.14  | 108.07          | 197.13         | 99.07            | <b>T</b> | 1188.60        | 594.80          | 1171.57        | 586.29           | 1170.59        | 585.80           | <b>12</b> |
| <b>3</b>  | 302.17  | 151.59          | <b>284.16</b>  | 142.58           | <b>S</b> | 1087.55        | 544.28          | 1070.53        | 535.77           | 1069.54        | 535.27           | <b>11</b> |
| <b>4</b>  | 401.24  | 201.12          | <b>383.23</b>  | 192.12           | <b>V</b> | <b>1000.52</b> | 500.76          | 983.49         | 492.25           | 982.51         | 491.76           | <b>10</b> |
| <b>5</b>  | 548.31  | 274.66          | 530.30         | 265.65           | <b>F</b> | <b>901.45</b>  | 451.23          | 884.43         | 442.72           | 883.44         | 442.22           | <b>9</b>  |
| <b>6</b>  | 605.33  | 303.17          | 587.32         | 294.16           | <b>G</b> | <b>754.38</b>  | 377.70          | 737.36         | <b>369.18</b>    | 736.37         | 368.69           | <b>8</b>  |
| <b>7</b>  | 662.35  | 331.68          | 644.34         | 322.67           | <b>G</b> | <b>697.36</b>  | 349.19          | 680.34         | 340.67           | 679.35         | 340.18           | <b>7</b>  |
| <b>8</b>  | 733.39  | 367.20          | 715.38         | 358.19           | <b>A</b> | <b>640.34</b>  | 320.67          | 623.31         | 312.16           | 622.33         | 311.67           | <b>6</b>  |
| <b>9</b>  | 804.43  | 402.72          | 786.41         | 393.71           | <b>A</b> | <b>569.30</b>  | 285.16          | 552.28         | 276.64           | 551.29         | 276.15           | <b>5</b>  |
| <b>10</b> | 933.47  | 467.24          | 915.46         | 458.23           | <b>E</b> | <b>498.27</b>  | 249.64          | 481.24         | 241.12           | <b>480.26</b>  | 240.63           | <b>4</b>  |
| <b>11</b> | 1030.52 | 515.76          | 1012.51        | 506.76           | <b>P</b> | <b>369.22</b>  | 185.12          | <b>352.20</b>  | 176.60           |                |                  | <b>3</b>  |
| <b>12</b> | 1127.57 | 564.29          | 1109.56        | 555.28           | <b>P</b> | 272.17         | 136.59          | 255.15         | 128.08           |                |                  | <b>2</b>  |
| <b>13</b> |         |                 |                |                  | <b>R</b> | <b>175.12</b>  | 88.06           | 158.09         | 79.55            |                |                  | <b>1</b>  |

MS/MS Fragmentation of ID810 **AFLTLEELR**

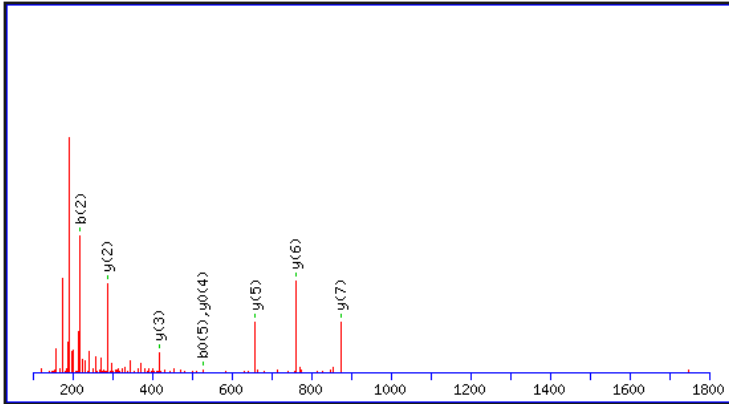

| #        | <b>b</b>      | <b>b<sup>++</sup></b> | <b>b<sup>0</sup></b> | <b>b<sup>0++</sup></b> | <b>Seq.</b> | <b>y</b>      | <b>y<sup>++</sup></b> | <b>y<sup>*</sup></b> | <b>y<sup>*++</sup></b> | <b>y<sup>0</sup></b> | <b>y<sup>0++</sup></b> | #        |
|----------|---------------|-----------------------|----------------------|------------------------|-------------|---------------|-----------------------|----------------------|------------------------|----------------------|------------------------|----------|
| <b>1</b> | 72.04         | 36.53                 |                      |                        | <b>A</b>    |               |                       |                      |                        |                      |                        | <b>9</b> |
| <b>2</b> | <b>219.11</b> | 110.06                |                      |                        | <b>F</b>    | 1020.57       | 510.79                | 1003.55              | 502.28                 | 1002.56              | 501.78                 | <b>8</b> |
| <b>3</b> | 332.20        | 166.60                |                      |                        | <b>L</b>    | <b>873.50</b> | 437.26                | 856.48               | 428.74                 | 855.49               | 428.25                 | <b>7</b> |
| <b>4</b> | 433.24        | 217.13                | 415.23               | 208.12                 | <b>T</b>    | <b>760.42</b> | 380.71                | 743.39               | 372.20                 | 742.41               | 371.71                 | <b>6</b> |
| <b>5</b> | 546.33        | 273.67                | <b>528.32</b>        | 264.66                 | <b>L</b>    | <b>659.37</b> | 330.19                | 642.35               | 321.68                 | 641.36               | 321.18                 | <b>5</b> |
| <b>6</b> | 675.37        | 338.19                | 657.36               | 329.18                 | <b>E</b>    | 546.29        | 273.65                | 529.26               | 265.13                 | <b>528.28</b>        | 264.64                 | <b>4</b> |
| <b>7</b> | 804.41        | 402.71                | 786.40               | 393.71                 | <b>E</b>    | <b>417.25</b> | 209.13                | 400.22               | 200.61                 | 399.24               | 200.12                 | <b>3</b> |
| <b>8</b> | 917.50        | 459.25                | 899.49               | 450.25                 | <b>L</b>    | <b>288.20</b> | 144.61                | 271.18               | 136.09                 |                      |                        | <b>2</b> |
| <b>9</b> |               |                       |                      |                        | <b>R</b>    | 175.12        | 88.06                 | 158.09               | 79.55                  |                      |                        | <b>1</b> |

MS/MS Fragmentation of ID812 **ILVLGLDNAGK**

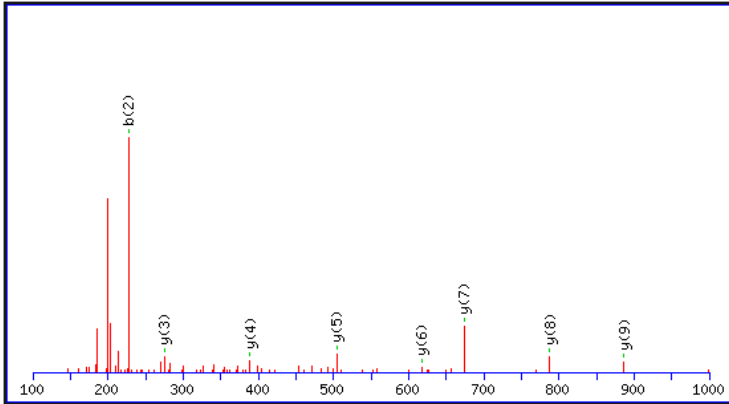

| #         | <b>b</b>      | <b>b<sup>++</sup></b> | <b>b<sup>*</sup></b> | <b>b<sup>*++</sup></b> | <b>b<sup>0</sup></b> | <b>b<sup>0++</sup></b> | Seq.     | <b>y</b>      | <b>y<sup>++</sup></b> | <b>y<sup>*</sup></b> | <b>y<sup>*++</sup></b> | <b>y<sup>0</sup></b> | <b>y<sup>0++</sup></b> | #         |
|-----------|---------------|-----------------------|----------------------|------------------------|----------------------|------------------------|----------|---------------|-----------------------|----------------------|------------------------|----------------------|------------------------|-----------|
| <b>1</b>  | 114.09        | 57.55                 |                      |                        |                      |                        | <b>I</b> |               |                       |                      |                        |                      |                        | <b>11</b> |
| <b>2</b>  | <b>227.18</b> | 114.09                |                      |                        |                      |                        | <b>L</b> | 999.58        | 500.30                | 982.56               | 491.78                 | 981.57               | 491.29                 | <b>10</b> |
| <b>3</b>  | 326.24        | 163.63                |                      |                        |                      |                        | <b>V</b> | <b>886.50</b> | 443.75                | 869.47               | 435.24                 | 868.49               | 434.75                 | <b>9</b>  |
| <b>4</b>  | 439.33        | 220.17                |                      |                        |                      |                        | <b>L</b> | <b>787.43</b> | 394.22                | 770.40               | 385.71                 | 769.42               | 385.21                 | <b>8</b>  |
| <b>5</b>  | 496.35        | 248.68                |                      |                        |                      |                        | <b>G</b> | <b>674.35</b> | 337.68                | 657.32               | 329.16                 | 656.34               | 328.67                 | <b>7</b>  |
| <b>6</b>  | 609.43        | 305.22                |                      |                        |                      |                        | <b>L</b> | <b>617.33</b> | 309.17                | 600.30               | 300.65                 | 599.31               | 300.16                 | <b>6</b>  |
| <b>7</b>  | 724.46        | 362.73                |                      |                        | 706.45               | 353.73                 | <b>D</b> | <b>504.24</b> | 252.62                | 487.21               | 244.11                 | 486.23               | 243.62                 | <b>5</b>  |
| <b>8</b>  | 838.50        | 419.76                | 821.48               | 411.24                 | 820.49               | 410.75                 | <b>N</b> | <b>389.21</b> | 195.11                | 372.19               | 186.60                 |                      |                        | <b>4</b>  |
| <b>9</b>  | 909.54        | 455.27                | 892.51               | 446.76                 | 891.53               | 446.27                 | <b>A</b> | <b>275.17</b> | 138.09                | 258.14               | 129.58                 |                      |                        | <b>3</b>  |
| <b>10</b> | 966.56        | 483.78                | 949.54               | 475.27                 | 948.55               | 474.78                 | <b>G</b> | 204.13        | 102.57                | 187.11               | 94.06                  |                      |                        | <b>2</b>  |
| <b>11</b> |               |                       |                      |                        |                      |                        | <b>K</b> | 147.11        | 74.06                 | 130.09               | 65.55                  |                      |                        | <b>1</b>  |

MS/MS Fragmentation of ID813 **SFPYILEGLR**

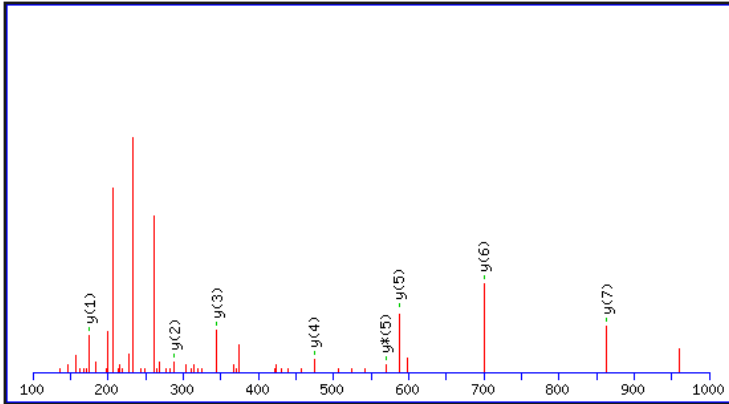

| #         | <b>b</b> | <b>b<sup>++</sup></b> | <b>b<sup>0</sup></b> | <b>b<sup>0++</sup></b> | Seq.     | <b>y</b>      | <b>y<sup>++</sup></b> | <b>y<sup>*</sup></b> | <b>y<sup>*++</sup></b> | <b>y<sup>0</sup></b> | <b>y<sup>0++</sup></b> | #         |
|-----------|----------|-----------------------|----------------------|------------------------|----------|---------------|-----------------------|----------------------|------------------------|----------------------|------------------------|-----------|
| <b>1</b>  | 88.04    | 44.52                 | 70.03                | 35.52                  | <b>S</b> |               |                       |                      |                        |                      |                        | <b>10</b> |
| <b>2</b>  | 235.11   | 118.06                | 217.10               | 109.05                 | <b>F</b> | 1107.62       | 554.31                | 1090.59              | 545.80                 | 1089.61              | 545.31                 | <b>9</b>  |
| <b>3</b>  | 332.16   | 166.58                | 314.15               | 157.58                 | <b>P</b> | 960.55        | 480.78                | 943.52               | 472.27                 | 942.54               | 471.77                 | <b>8</b>  |
| <b>4</b>  | 495.22   | 248.12                | 477.21               | 239.11                 | <b>Y</b> | <b>863.50</b> | 432.25                | 846.47               | 423.74                 | 845.49               | 423.25                 | <b>7</b>  |
| <b>5</b>  | 608.31   | 304.66                | 590.30               | 295.65                 | <b>I</b> | <b>700.44</b> | 350.72                | 683.41               | 342.21                 | 682.42               | 341.72                 | <b>6</b>  |
| <b>6</b>  | 721.39   | 361.20                | 703.38               | 352.19                 | <b>L</b> | <b>587.35</b> | 294.18                | <b>570.32</b>        | 285.67                 | 569.34               | 285.17                 | <b>5</b>  |
| <b>7</b>  | 850.43   | 425.72                | 832.42               | 416.72                 | <b>E</b> | <b>474.27</b> | 237.64                | 457.24               | 229.12                 | 456.26               | 228.63                 | <b>4</b>  |
| <b>8</b>  | 907.46   | 454.23                | 889.45               | 445.23                 | <b>G</b> | <b>345.22</b> | 173.12                | 328.20               | 164.60                 |                      |                        | <b>3</b>  |
| <b>9</b>  | 1020.54  | 510.77                | 1002.53              | 501.77                 | <b>L</b> | <b>288.20</b> | 144.61                | 271.18               | 136.09                 |                      |                        | <b>2</b>  |
| <b>10</b> |          |                       |                      |                        | <b>R</b> | <b>175.12</b> | 88.06                 | 158.09               | 79.55                  |                      |                        | <b>1</b>  |

MS/MS Fragmentation of ID815 **ILQEEIGGVK**

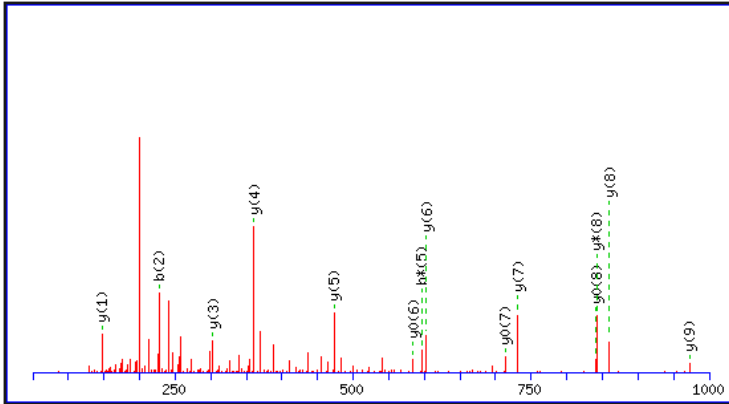

| #         | <b>b</b>      | <b>b<sup>++</sup></b> | <b>b<sup>*</sup></b> | <b>b<sup>*++</sup></b> | <b>b<sup>0</sup></b> | <b>b<sup>0++</sup></b> | Seq.     | <b>y</b>      | <b>y<sup>++</sup></b> | <b>y<sup>*</sup></b> | <b>y<sup>*++</sup></b> | <b>y<sup>0</sup></b> | <b>y<sup>0++</sup></b> | #         |
|-----------|---------------|-----------------------|----------------------|------------------------|----------------------|------------------------|----------|---------------|-----------------------|----------------------|------------------------|----------------------|------------------------|-----------|
| <b>1</b>  | 114.09        | 57.55                 |                      |                        |                      |                        | <b>I</b> |               |                       |                      |                        |                      |                        | <b>10</b> |
| <b>2</b>  | <b>227.18</b> | 114.09                |                      |                        |                      |                        | <b>L</b> | <b>972.54</b> | 486.77                | 955.51               | 478.26                 | 954.53               | 477.77                 | <b>9</b>  |
| <b>3</b>  | 355.23        | 178.12                | 338.21               | 169.61                 |                      |                        | <b>Q</b> | <b>859.45</b> | 430.23                | <b>842.43</b>        | 421.72                 | <b>841.44</b>        | 421.22                 | <b>8</b>  |
| <b>4</b>  | 484.28        | 242.64                | 467.25               | 234.13                 | 466.27               | 233.64                 | <b>E</b> | <b>731.39</b> | 366.20                | 714.37               | 357.69                 | <b>713.38</b>        | 357.20                 | <b>7</b>  |
| <b>5</b>  | 613.32        | 307.16                | <b>596.29</b>        | 298.65                 | 595.31               | 298.16                 | <b>E</b> | <b>602.35</b> | 301.68                | 585.32               | 293.17                 | <b>584.34</b>        | 292.67                 | <b>6</b>  |
| <b>6</b>  | 726.40        | 363.71                | 709.38               | 355.19                 | 708.39               | 354.70                 | <b>I</b> | <b>473.31</b> | 237.16                | 456.28               | 228.64                 |                      |                        | <b>5</b>  |
| <b>7</b>  | 783.42        | 392.22                | 766.40               | 383.70                 | 765.41               | 383.21                 | <b>G</b> | <b>360.22</b> | 180.62                | 343.20               | 172.10                 |                      |                        | <b>4</b>  |
| <b>8</b>  | 840.45        | 420.73                | 823.42               | 412.21                 | 822.44               | 411.72                 | <b>G</b> | <b>303.20</b> | 152.10                | 286.18               | 143.59                 |                      |                        | <b>3</b>  |
| <b>9</b>  | 939.51        | 470.26                | 922.49               | 461.75                 | 921.50               | 461.26                 | <b>V</b> | 246.18        | 123.59                | 229.15               | 115.08                 |                      |                        | <b>2</b>  |
| <b>10</b> |               |                       |                      |                        |                      |                        | <b>K</b> | <b>147.11</b> | 74.06                 | 130.09               | 65.55                  |                      |                        | <b>1</b>  |

MS/MS Fragmentation of ID824 **LQDGTVFFK**

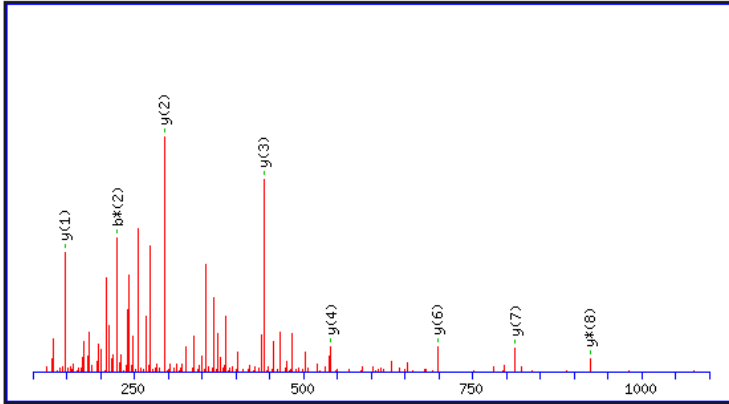

| #        | <b>b</b> | <b>b<sup>++</sup></b> | <b>b<sup>*</sup></b> | <b>b<sup>*++</sup></b> | <b>b<sup>0</sup></b> | <b>b<sup>0++</sup></b> | Seq.     | <b>y</b>      | <b>y<sup>++</sup></b> | <b>y<sup>*</sup></b> | <b>y<sup>*++</sup></b> | <b>y<sup>0</sup></b> | <b>y<sup>0++</sup></b> | #        |
|----------|----------|-----------------------|----------------------|------------------------|----------------------|------------------------|----------|---------------|-----------------------|----------------------|------------------------|----------------------|------------------------|----------|
| <b>1</b> | 114.09   | 57.55                 |                      |                        |                      |                        | <b>L</b> |               |                       |                      |                        |                      |                        | <b>9</b> |
| <b>2</b> | 242.15   | 121.58                | <b>225.12</b>        | 113.07                 |                      |                        | <b>Q</b> | 941.47        | 471.24                | <b>924.45</b>        | 462.73                 | 923.46               | 462.23                 | <b>8</b> |
| <b>3</b> | 357.18   | 179.09                | 340.15               | 170.58                 | 339.17               | 170.09                 | <b>D</b> | <b>813.41</b> | 407.21                | 796.39               | 398.70                 | 795.40               | 398.21                 | <b>7</b> |
| <b>4</b> | 414.20   | 207.60                | 397.17               | 199.09                 | 396.19               | 198.60                 | <b>G</b> | <b>698.39</b> | 349.70                | 681.36               | 341.18                 | 680.38               | 340.69                 | <b>6</b> |
| <b>5</b> | 515.25   | 258.13                | 498.22               | 249.61                 | 497.24               | 249.12                 | <b>T</b> | 641.37        | 321.19                | 624.34               | 312.67                 | 623.36               | 312.18                 | <b>5</b> |
| <b>6</b> | 614.31   | 307.66                | 597.29               | 299.15                 | 596.30               | 298.66                 | <b>V</b> | <b>540.32</b> | 270.66                | 523.29               | 262.15                 |                      |                        | <b>4</b> |
| <b>7</b> | 761.38   | 381.20                | 744.36               | 372.68                 | 743.37               | 372.19                 | <b>F</b> | <b>441.25</b> | 221.13                | 424.22               | 212.62                 |                      |                        | <b>3</b> |
| <b>8</b> | 908.45   | 454.73                | 891.42               | 446.22                 | 890.44               | 445.72                 | <b>F</b> | <b>294.18</b> | 147.59                | 277.15               | 139.08                 |                      |                        | <b>2</b> |
| <b>9</b> |          |                       |                      |                        |                      |                        | <b>K</b> | <b>147.11</b> | 74.06                 | 130.09               | 65.55                  |                      |                        | <b>1</b> |

MS/MS Fragmentation of ID825 **EIYDQYGEDALK**

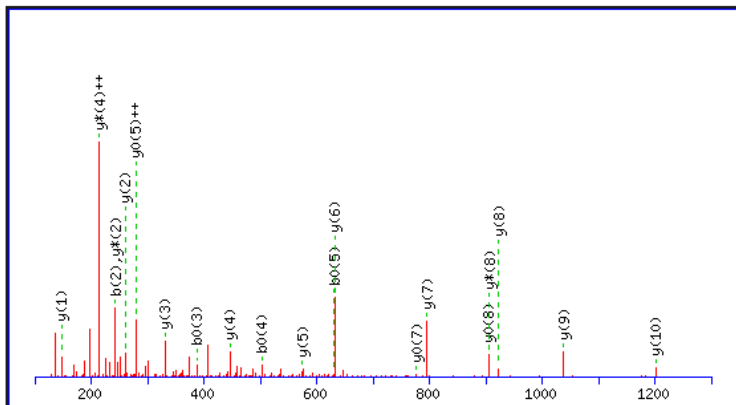

| #  | b             | b <sup>++</sup> | b <sup>*</sup> | b <sup>*++</sup> | b <sup>0</sup> | b <sup>0++</sup> | Seq. | y              | y <sup>++</sup> | y <sup>*</sup> | y <sup>*++</sup> | y <sup>0</sup> | y <sup>0++</sup> | #  |
|----|---------------|-----------------|----------------|------------------|----------------|------------------|------|----------------|-----------------|----------------|------------------|----------------|------------------|----|
| 1  | 130.05        | 65.53           |                |                  | 112.04         | 56.52            | E    |                |                 |                |                  |                |                  | 12 |
| 2  | <b>243.13</b> | 122.07          |                |                  | 225.12         | 113.07           | I    | 1314.62        | 657.81          | 1297.59        | 649.30           | 1296.61        | 648.81           | 11 |
| 3  | 406.20        | 203.60          |                |                  | <b>388.19</b>  | 194.60           | Y    | <b>1201.54</b> | 601.27          | 1184.51        | 592.76           | 1183.53        | 592.27           | 10 |
| 4  | 521.22        | 261.12          |                |                  | <b>503.21</b>  | 252.11           | D    | <b>1038.47</b> | 519.74          | 1021.45        | 511.23           | 1020.46        | 510.74           | 9  |
| 5  | 649.28        | 325.15          | 632.26         | 316.63           | <b>631.27</b>  | 316.14           | Q    | <b>923.45</b>  | 462.23          | <b>906.42</b>  | 453.71           | <b>905.44</b>  | 453.22           | 8  |
| 6  | 812.35        | 406.68          | 795.32         | 398.16           | 794.34         | 397.67           | Y    | <b>795.39</b>  | 398.20          | 778.36         | 389.68           | <b>777.38</b>  | 389.19           | 7  |
| 7  | 869.37        | 435.19          | 852.34         | 426.67           | 851.36         | 426.18           | G    | <b>632.32</b>  | 316.67          | 615.30         | 308.15           | 614.31         | 307.66           | 6  |
| 8  | 998.41        | 499.71          | 981.38         | 491.20           | 980.40         | 490.70           | E    | <b>575.30</b>  | 288.16          | 558.28         | 279.64           | 557.29         | <b>279.15</b>    | 5  |
| 9  | 1113.44       | 557.22          | 1096.41        | 548.71           | 1095.43        | 548.22           | D    | <b>446.26</b>  | 223.63          | 429.23         | <b>215.12</b>    | 428.25         | 214.63           | 4  |
| 10 | 1184.47       | 592.74          | 1167.45        | 584.23           | 1166.46        | 583.74           | A    | <b>331.23</b>  | 166.12          | 314.21         | 157.61           |                |                  | 3  |
| 11 | 1297.56       | 649.28          | 1280.53        | 640.77           | 1279.55        | 640.28           | L    | <b>260.20</b>  | 130.60          | <b>243.17</b>  | 122.09           |                |                  | 2  |
| 12 |               |                 |                |                  |                |                  | K    | <b>147.11</b>  | 74.06           | 130.09         | 65.55            |                |                  | 1  |



MS/MS Fragmentation of ID829 **YILEDTSEILR**

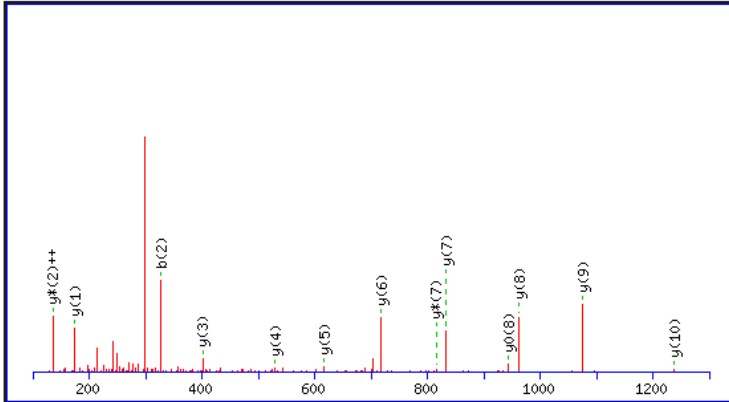

| #         | <b>b</b>      | <b>b<sup>++</sup></b> | <b>b<sup>0</sup></b> | <b>b<sup>0++</sup></b> | Seq.     | <b>y</b>       | <b>y<sup>++</sup></b> | <b>y<sup>*</sup></b> | <b>y<sup>*++</sup></b> | <b>y<sup>0</sup></b> | <b>y<sup>0++</sup></b> | #         |
|-----------|---------------|-----------------------|----------------------|------------------------|----------|----------------|-----------------------|----------------------|------------------------|----------------------|------------------------|-----------|
| <b>1</b>  | 164.07        | 82.54                 |                      |                        | <b>Y</b> |                |                       |                      |                        |                      |                        | <b>11</b> |
| <b>2</b>  | <b>327.13</b> | 164.07                |                      |                        | <b>Y</b> | <b>1238.63</b> | 619.82                | 1221.60              | 611.30                 | 1220.62              | 610.81                 | <b>10</b> |
| <b>3</b>  | 440.22        | 220.61                |                      |                        | <b>L</b> | <b>1075.56</b> | 538.29                | 1058.54              | 529.77                 | 1057.55              | 529.28                 | <b>9</b>  |
| <b>4</b>  | 569.26        | 285.13                | 551.25               | 276.13                 | <b>E</b> | <b>962.48</b>  | 481.74                | 945.45               | 473.23                 | <b>944.47</b>        | 472.74                 | <b>8</b>  |
| <b>5</b>  | 684.29        | 342.65                | 666.28               | 333.64                 | <b>D</b> | <b>833.44</b>  | 417.22                | <b>816.41</b>        | 408.71                 | 815.43               | 408.22                 | <b>7</b>  |
| <b>6</b>  | 785.34        | 393.17                | 767.32               | 384.17                 | <b>T</b> | <b>718.41</b>  | 359.71                | 701.38               | 351.20                 | 700.40               | 350.70                 | <b>6</b>  |
| <b>7</b>  | 872.37        | 436.69                | 854.36               | 427.68                 | <b>S</b> | <b>617.36</b>  | 309.18                | 600.34               | 300.67                 | 599.35               | 300.18                 | <b>5</b>  |
| <b>8</b>  | 1001.41       | 501.21                | 983.40               | 492.20                 | <b>E</b> | <b>530.33</b>  | 265.67                | 513.30               | 257.16                 | 512.32               | 256.66                 | <b>4</b>  |
| <b>9</b>  | 1114.49       | 557.75                | 1096.48              | 548.75                 | <b>I</b> | <b>401.29</b>  | 201.15                | 384.26               | 192.63                 |                      |                        | <b>3</b>  |
| <b>10</b> | 1227.58       | 614.29                | 1209.57              | 605.29                 | <b>L</b> | 288.20         | 144.61                | 271.18               | <b>136.09</b>          |                      |                        | <b>2</b>  |
| <b>11</b> |               |                       |                      |                        | <b>R</b> | <b>175.12</b>  | 88.06                 | 158.09               | 79.55                  |                      |                        | <b>1</b>  |

MS/MS Fragmentation of ID830 **LLSSQVLEPLR**

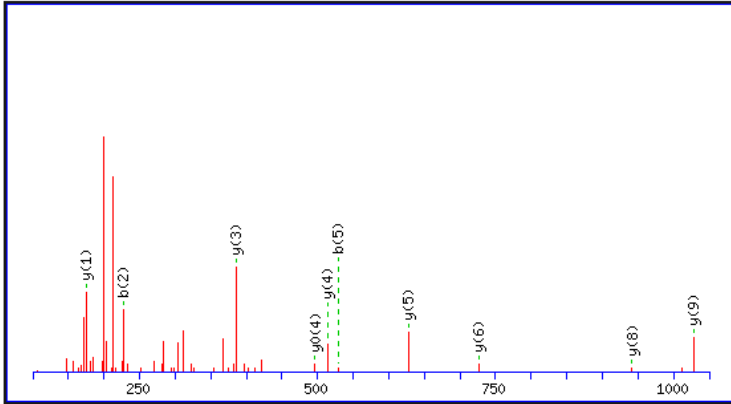

| #         | <b>b</b>      | <b>b<sup>++</sup></b> | <b>b<sup>*</sup></b> | <b>b<sup>*++</sup></b> | <b>b<sup>0</sup></b> | <b>b<sup>0++</sup></b> | Seq.     | <b>y</b>       | <b>y<sup>++</sup></b> | <b>y<sup>*</sup></b> | <b>y<sup>*++</sup></b> | <b>y<sup>0</sup></b> | <b>y<sup>0++</sup></b> | #         |
|-----------|---------------|-----------------------|----------------------|------------------------|----------------------|------------------------|----------|----------------|-----------------------|----------------------|------------------------|----------------------|------------------------|-----------|
| <b>1</b>  | 114.09        | 57.55                 |                      |                        |                      |                        | <b>L</b> |                |                       |                      |                        |                      |                        | <b>11</b> |
| <b>2</b>  | <b>227.18</b> | 114.09                |                      |                        |                      |                        | <b>L</b> | 1141.66        | 571.33                | 1124.63              | 562.82                 | 1123.65              | 562.33                 | <b>10</b> |
| <b>3</b>  | 314.21        | 157.61                |                      |                        | 296.20               | 148.60                 | <b>S</b> | <b>1028.57</b> | 514.79                | 1011.55              | 506.28                 | 1010.56              | 505.79                 | <b>9</b>  |
| <b>4</b>  | 401.24        | 201.12                |                      |                        | 383.23               | 192.12                 | <b>S</b> | <b>941.54</b>  | 471.27                | 924.51               | 462.76                 | 923.53               | 462.27                 | <b>8</b>  |
| <b>5</b>  | <b>529.30</b> | 265.15                | 512.27               | 256.64                 | 511.29               | 256.15                 | <b>Q</b> | 854.51         | 427.76                | 837.48               | 419.25                 | 836.50               | 418.75                 | <b>7</b>  |
| <b>6</b>  | 628.37        | 314.69                | 611.34               | 306.17                 | 610.36               | 305.68                 | <b>V</b> | <b>726.45</b>  | 363.73                | 709.42               | 355.22                 | 708.44               | 354.72                 | <b>6</b>  |
| <b>7</b>  | 741.45        | 371.23                | 724.42               | 362.72                 | 723.44               | 362.22                 | <b>L</b> | <b>627.38</b>  | 314.19                | 610.36               | 305.68                 | 609.37               | 305.19                 | <b>5</b>  |
| <b>8</b>  | 870.49        | 435.75                | 853.47               | 427.24                 | 852.48               | 426.74                 | <b>E</b> | <b>514.30</b>  | 257.65                | 497.27               | 249.14                 | <b>496.29</b>        | 248.65                 | <b>4</b>  |
| <b>9</b>  | 967.55        | 484.28                | 950.52               | 475.76                 | 949.54               | 475.27                 | <b>P</b> | <b>385.26</b>  | 193.13                | 368.23               | 184.62                 |                      |                        | <b>3</b>  |
| <b>10</b> | 1080.63       | 540.82                | 1063.60              | 532.31                 | 1062.62              | 531.81                 | <b>L</b> | 288.20         | 144.61                | 271.18               | 136.09                 |                      |                        | <b>2</b>  |
| <b>11</b> |               |                       |                      |                        |                      |                        | <b>R</b> | <b>175.12</b>  | 88.06                 | 158.09               | 79.55                  |                      |                        | <b>1</b>  |

MS/MS Fragmentation of ID831 **AITELSGVTSR**

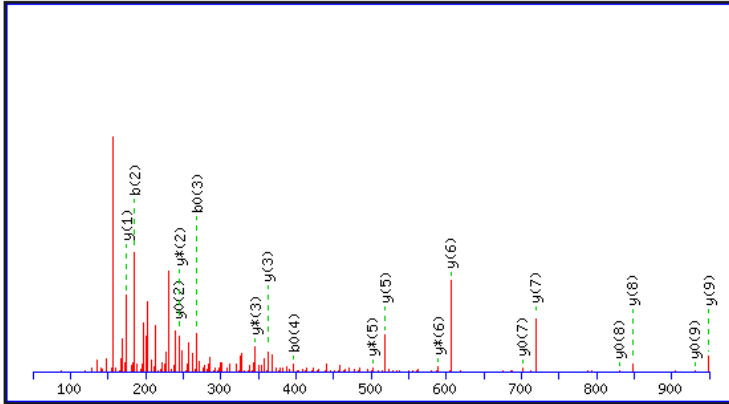

| #         | <b>b</b>      | <b>b<sup>++</sup></b> | <b>b<sup>0</sup></b> | <b>b<sup>0++</sup></b> | Seq.     | <b>y</b>      | <b>y<sup>++</sup></b> | <b>y<sup>*</sup></b> | <b>y<sup>*++</sup></b> | <b>y<sup>0</sup></b> | <b>y<sup>0++</sup></b> | #         |
|-----------|---------------|-----------------------|----------------------|------------------------|----------|---------------|-----------------------|----------------------|------------------------|----------------------|------------------------|-----------|
| <b>1</b>  | 72.04         | 36.53                 |                      |                        | <b>A</b> |               |                       |                      |                        |                      |                        | <b>11</b> |
| <b>2</b>  | <b>185.13</b> | 93.07                 |                      |                        | <b>I</b> | 1062.58       | 531.79                | 1045.55              | 523.28                 | 1044.57              | 522.79                 | <b>10</b> |
| <b>3</b>  | 286.18        | 143.59                | <b>268.17</b>        | 134.59                 | <b>T</b> | <b>949.49</b> | 475.25                | 932.47               | 466.74                 | <b>931.48</b>        | 466.25                 | <b>9</b>  |
| <b>4</b>  | 415.22        | 208.11                | <b>397.21</b>        | 199.11                 | <b>E</b> | <b>848.45</b> | 424.73                | 831.42               | 416.21                 | <b>830.44</b>        | 415.72                 | <b>8</b>  |
| <b>5</b>  | 528.30        | 264.66                | 510.29               | 255.65                 | <b>L</b> | <b>719.40</b> | 360.21                | 702.38               | 351.69                 | <b>701.39</b>        | 351.20                 | <b>7</b>  |
| <b>6</b>  | 615.33        | 308.17                | 597.32               | 299.17                 | <b>S</b> | <b>606.32</b> | 303.66                | <b>589.29</b>        | 295.15                 | 588.31               | 294.66                 | <b>6</b>  |
| <b>7</b>  | 672.36        | 336.68                | 654.35               | 327.68                 | <b>G</b> | <b>519.29</b> | 260.15                | <b>502.26</b>        | 251.63                 | 501.28               | 251.14                 | <b>5</b>  |
| <b>8</b>  | 771.42        | 386.22                | 753.41               | 377.21                 | <b>V</b> | 462.27        | 231.64                | 445.24               | 223.12                 | 444.26               | 222.63                 | <b>4</b>  |
| <b>9</b>  | 872.47        | 436.74                | 854.46               | 427.73                 | <b>T</b> | <b>363.20</b> | 182.10                | <b>346.17</b>        | 173.59                 | 345.19               | 173.10                 | <b>3</b>  |
| <b>10</b> | 959.50        | 480.26                | 941.49               | 471.25                 | <b>S</b> | 262.15        | 131.58                | <b>245.12</b>        | 123.07                 | <b>244.14</b>        | 122.57                 | <b>2</b>  |
| <b>11</b> |               |                       |                      |                        | <b>R</b> | <b>175.12</b> | 88.06                 | 158.09               | 79.55                  |                      |                        | <b>1</b>  |

MS/MS Fragmentation of ID833 **IETLEVL**SVR

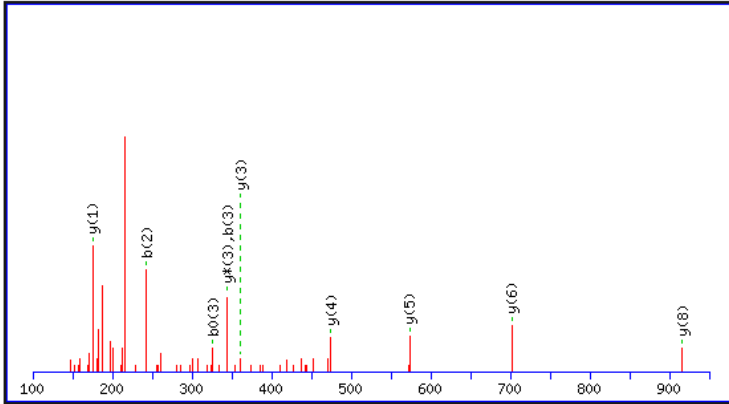

| #         | <b>b</b>      | <b>b<sup>++</sup></b> | <b>b<sup>0</sup></b> | <b>b<sup>0++</sup></b> | Seq.     | <b>y</b>      | <b>y<sup>++</sup></b> | <b>y<sup>*</sup></b> | <b>y<sup>*++</sup></b> | <b>y<sup>0</sup></b> | <b>y<sup>0++</sup></b> | #         |
|-----------|---------------|-----------------------|----------------------|------------------------|----------|---------------|-----------------------|----------------------|------------------------|----------------------|------------------------|-----------|
| <b>1</b>  | 114.09        | 57.55                 |                      |                        | <b>I</b> |               |                       |                      |                        |                      |                        | <b>10</b> |
| <b>2</b>  | <b>243.13</b> | 122.07                | 225.12               | 113.07                 | <b>E</b> | 1045.59       | 523.30                | 1028.56              | 514.78                 | 1027.58              | 514.29                 | <b>9</b>  |
| <b>3</b>  | <b>344.18</b> | 172.59                | <b>326.17</b>        | 163.59                 | <b>T</b> | <b>916.55</b> | 458.78                | 899.52               | 450.26                 | 898.54               | 449.77                 | <b>8</b>  |
| <b>4</b>  | 457.27        | 229.14                | 439.26               | 220.13                 | <b>L</b> | 815.50        | 408.25                | 798.47               | 399.74                 | 797.49               | 399.25                 | <b>7</b>  |
| <b>5</b>  | 586.31        | 293.66                | 568.30               | 284.65                 | <b>E</b> | <b>702.41</b> | 351.71                | 685.39               | 343.20                 | 684.40               | 342.71                 | <b>6</b>  |
| <b>6</b>  | 685.38        | 343.19                | 667.37               | 334.19                 | <b>V</b> | <b>573.37</b> | 287.19                | 556.35               | 278.68                 | 555.36               | 278.18                 | <b>5</b>  |
| <b>7</b>  | 798.46        | 399.73                | 780.45               | 390.73                 | <b>L</b> | <b>474.30</b> | 237.66                | 457.28               | 229.14                 | 456.29               | 228.65                 | <b>4</b>  |
| <b>8</b>  | 885.49        | 443.25                | 867.48               | 434.24                 | <b>S</b> | <b>361.22</b> | 181.11                | <b>344.19</b>        | 172.60                 | 343.21               | 172.11                 | <b>3</b>  |
| <b>9</b>  | 984.56        | 492.78                | 966.55               | 483.78                 | <b>V</b> | 274.19        | 137.60                | 257.16               | 129.08                 |                      |                        | <b>2</b>  |
| <b>10</b> |               |                       |                      |                        | <b>R</b> | <b>175.12</b> | 88.06                 | 158.09               | 79.55                  |                      |                        | <b>1</b>  |

MS/MS Fragmentation of ID834 **NMDDDEVFTFAK**

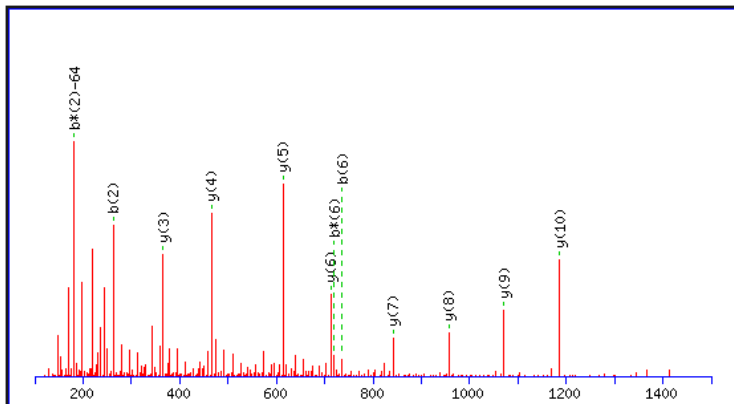

| #  | b             | b <sup>++</sup> | b*            | b <sup>*++</sup> | b <sup>0</sup> | b <sup>0++</sup> | Seq. | y              | y <sup>++</sup> | y*      | y <sup>*++</sup> | y <sup>0</sup> | y <sup>0++</sup> | #  |
|----|---------------|-----------------|---------------|------------------|----------------|------------------|------|----------------|-----------------|---------|------------------|----------------|------------------|----|
| 1  | 115.05        | 58.03           | 98.02         | 49.52            |                |                  | N    |                |                 |         |                  |                |                  | 12 |
| 2  | <b>262.09</b> | 131.55          | 245.06        | 123.03           |                |                  | M    | 1333.56        | 667.28          | 1316.54 | 658.77           | 1315.55        | 658.28           | 11 |
| 3  | 377.11        | 189.06          | 360.09        | 180.55           | 359.10         | 180.05           | D    | <b>1186.53</b> | 593.77          | 1169.50 | 585.25           | 1168.52        | 584.76           | 10 |
| 4  | 492.14        | 246.57          | 475.11        | 238.06           | 474.13         | 237.57           | D    | <b>1071.50</b> | 536.25          | 1054.47 | 527.74           | 1053.49        | 527.25           | 9  |
| 5  | 607.17        | 304.09          | 590.14        | 295.57           | 589.16         | 295.08           | D    | <b>956.47</b>  | 478.74          | 939.45  | 470.23           | 938.46         | 469.73           | 8  |
| 6  | <b>736.21</b> | 368.61          | <b>719.18</b> | 360.09           | 718.20         | 359.60           | E    | <b>841.45</b>  | 421.23          | 824.42  | 412.71           | 823.43         | 412.22           | 7  |
| 7  | 835.28        | 418.14          | 818.25        | 409.63           | 817.27         | 409.14           | V    | <b>712.40</b>  | 356.71          | 695.38  | 348.19           | 694.39         | 347.70           | 6  |
| 8  | 982.35        | 491.68          | 965.32        | 483.16           | 964.34         | 482.67           | F    | <b>613.33</b>  | 307.17          | 596.31  | 298.66           | 595.32         | 298.17           | 5  |
| 9  | 1083.39       | 542.20          | 1066.37       | 533.69           | 1065.38        | 533.20           | T    | <b>466.27</b>  | 233.64          | 449.24  | 225.12           | 448.26         | 224.63           | 4  |
| 10 | 1230.46       | 615.73          | 1213.44       | 607.22           | 1212.45        | 606.73           | F    | <b>365.22</b>  | 183.11          | 348.19  | 174.60           |                |                  | 3  |
| 11 | 1301.50       | 651.25          | 1284.47       | 642.74           | 1283.49        | 642.25           | A    | 218.15         | 109.58          | 201.12  | 101.07           |                |                  | 2  |
| 12 |               |                 |               |                  |                |                  | K    | 147.11         | 74.06           | 130.09  | 65.55            |                |                  | 1  |

MS/MS Fragmentation of ID836 **SNFDQLIELATK**

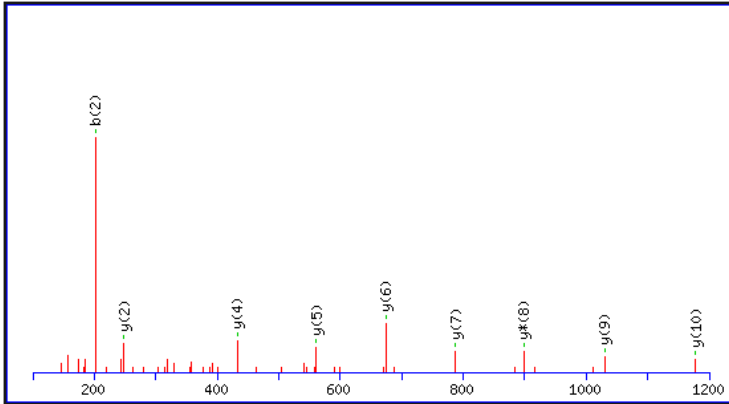

| #         | <b>b</b>      | <b>b<sup>++</sup></b> | <b>b<sup>*</sup></b> | <b>b<sup>*++</sup></b> | <b>b<sup>0</sup></b> | <b>b<sup>0++</sup></b> | Seq.     | <b>y</b>       | <b>y<sup>++</sup></b> | <b>y<sup>*</sup></b> | <b>y<sup>*++</sup></b> | <b>y<sup>0</sup></b> | <b>y<sup>0++</sup></b> | #         |
|-----------|---------------|-----------------------|----------------------|------------------------|----------------------|------------------------|----------|----------------|-----------------------|----------------------|------------------------|----------------------|------------------------|-----------|
| <b>1</b>  | 88.04         | 44.52                 |                      |                        | 70.03                | 35.52                  | <b>S</b> |                |                       |                      |                        |                      |                        | <b>12</b> |
| <b>2</b>  | <b>202.08</b> | 101.54                | 185.06               | 93.03                  | 184.07               | 92.54                  | <b>N</b> | 1291.69        | 646.35                | 1274.66              | 637.83                 | 1273.68              | 637.34                 | <b>11</b> |
| <b>3</b>  | 349.15        | 175.08                | 332.12               | 166.57                 | 331.14               | 166.07                 | <b>F</b> | <b>1177.65</b> | 589.33                | 1160.62              | 580.81                 | 1159.64              | 580.32                 | <b>10</b> |
| <b>4</b>  | 464.18        | 232.59                | 447.15               | 224.08                 | 446.17               | 223.59                 | <b>D</b> | <b>1030.58</b> | 515.79                | 1013.55              | 507.28                 | 1012.57              | 506.79                 | <b>9</b>  |
| <b>5</b>  | 592.24        | 296.62                | 575.21               | 288.11                 | 574.23               | 287.62                 | <b>Q</b> | 915.55         | 458.28                | <b>898.52</b>        | 449.77                 | 897.54               | 449.27                 | <b>8</b>  |
| <b>6</b>  | 705.32        | 353.16                | 688.29               | 344.65                 | 687.31               | 344.16                 | <b>L</b> | <b>787.49</b>  | 394.25                | 770.47               | 385.74                 | 769.48               | 385.24                 | <b>7</b>  |
| <b>7</b>  | 818.40        | 409.71                | 801.38               | 401.19                 | 800.39               | 400.70                 | <b>I</b> | <b>674.41</b>  | 337.71                | 657.38               | 329.19                 | 656.40               | 328.70                 | <b>6</b>  |
| <b>8</b>  | 947.45        | 474.23                | 930.42               | 465.71                 | 929.44               | 465.22                 | <b>E</b> | <b>561.32</b>  | 281.17                | 544.30               | 272.65                 | 543.31               | 272.16                 | <b>5</b>  |
| <b>9</b>  | 1060.53       | 530.77                | 1043.50              | 522.26                 | 1042.52              | 521.76                 | <b>L</b> | <b>432.28</b>  | 216.64                | 415.26               | 208.13                 | 414.27               | 207.64                 | <b>4</b>  |
| <b>10</b> | 1131.57       | 566.29                | 1114.54              | 557.77                 | 1113.56              | 557.28                 | <b>A</b> | 319.20         | 160.10                | 302.17               | 151.59                 | 301.19               | 151.10                 | <b>3</b>  |
| <b>11</b> | 1232.62       | 616.81                | 1215.59              | 608.30                 | 1214.61              | 607.81                 | <b>T</b> | <b>248.16</b>  | 124.58                | 231.13               | 116.07                 | 230.15               | 115.58                 | <b>2</b>  |
| <b>12</b> |               |                       |                      |                        |                      |                        | <b>K</b> | 147.11         | 74.06                 | 130.09               | 65.55                  |                      |                        | <b>1</b>  |

MS/MS Fragmentation of ID839 **AILVESR**

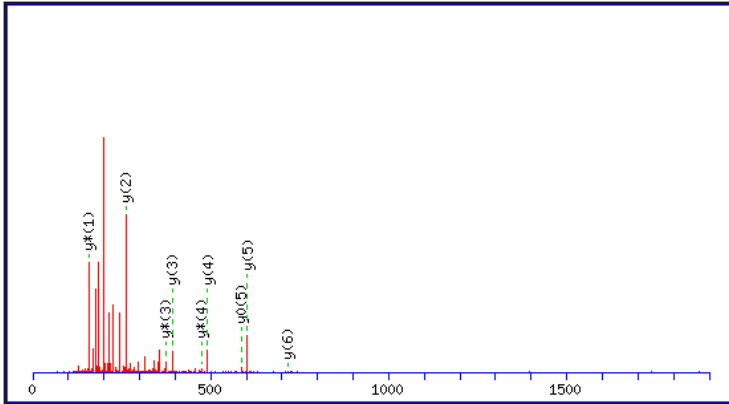

| #        | <b>b</b> | <b>b<sup>++</sup></b> | <b>b<sup>0</sup></b> | <b>b<sup>0++</sup></b> | <b>Seq.</b> | <b>y</b>      | <b>y<sup>++</sup></b> | <b>y<sup>*</sup></b> | <b>y<sup>***</sup></b> | <b>y<sup>0</sup></b> | <b>y<sup>0++</sup></b> | #        |
|----------|----------|-----------------------|----------------------|------------------------|-------------|---------------|-----------------------|----------------------|------------------------|----------------------|------------------------|----------|
| <b>1</b> | 114.05   | 57.53                 |                      |                        | <b>A</b>    |               |                       |                      |                        |                      |                        | <b>7</b> |
| <b>2</b> | 227.14   | 114.07                |                      |                        | <b>I</b>    | <b>716.43</b> | 358.72                | 699.40               | 350.21                 | 698.42               | 349.71                 | <b>6</b> |
| <b>3</b> | 340.22   | 170.62                |                      |                        | <b>L</b>    | <b>603.35</b> | 302.18                | 586.32               | 293.66                 | <b>585.34</b>        | 293.17                 | <b>5</b> |
| <b>4</b> | 439.29   | 220.15                |                      |                        | <b>V</b>    | <b>490.26</b> | 245.63                | <b>473.24</b>        | 237.12                 | 472.25               | 236.63                 | <b>4</b> |
| <b>5</b> | 568.33   | 284.67                | 550.32               | 275.67                 | <b>E</b>    | <b>391.19</b> | 196.10                | <b>374.17</b>        | 187.59                 | 373.18               | 187.10                 | <b>3</b> |
| <b>6</b> | 655.37   | 328.19                | 637.36               | 319.18                 | <b>S</b>    | <b>262.15</b> | 131.58                | 245.12               | 123.07                 | 244.14               | 122.57                 | <b>2</b> |
| <b>7</b> |          |                       |                      |                        | <b>R</b>    | 175.12        | 88.06                 | <b>158.09</b>        | 79.55                  |                      |                        | <b>1</b> |

MS/MS Fragmentation of ID840 **LVAEVLTPAYR**

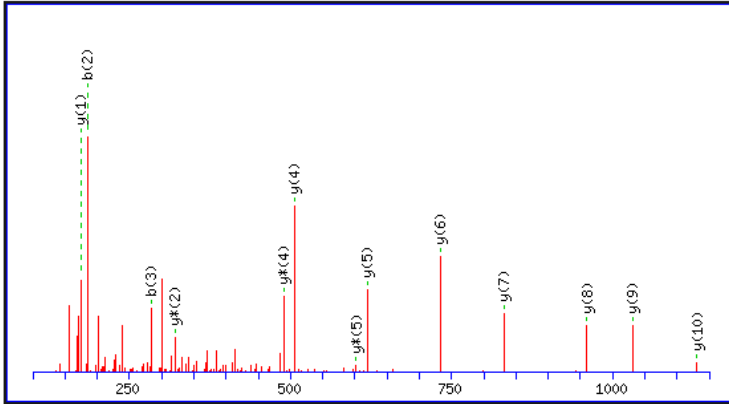

| #         | <b>b</b>      | <b>b<sup>++</sup></b> | <b>b<sup>0</sup></b> | <b>b<sup>0++</sup></b> | Seq.     | <b>y</b>       | <b>y<sup>++</sup></b> | <b>y<sup>*</sup></b> | <b>y<sup>*++</sup></b> | <b>y<sup>0</sup></b> | <b>y<sup>0++</sup></b> | #         |
|-----------|---------------|-----------------------|----------------------|------------------------|----------|----------------|-----------------------|----------------------|------------------------|----------------------|------------------------|-----------|
| <b>1</b>  | 114.09        | 57.55                 |                      |                        | <b>L</b> |                |                       |                      |                        |                      |                        | <b>12</b> |
| <b>2</b>  | <b>185.13</b> | 93.07                 |                      |                        | <b>A</b> | 1201.69        | 601.35                | 1184.67              | 592.84                 | 1183.68              | 592.35                 | <b>11</b> |
| <b>3</b>  | <b>284.20</b> | 142.60                |                      |                        | <b>V</b> | <b>1130.66</b> | 565.83                | 1113.63              | 557.32                 | 1112.65              | 556.83                 | <b>10</b> |
| <b>4</b>  | 355.23        | 178.12                |                      |                        | <b>A</b> | <b>1031.59</b> | 516.30                | 1014.56              | 507.78                 | 1013.58              | 507.29                 | <b>9</b>  |
| <b>5</b>  | 484.28        | 242.64                | 466.27               | 233.64                 | <b>E</b> | <b>960.55</b>  | 480.78                | 943.52               | 472.27                 | 942.54               | 471.77                 | <b>8</b>  |
| <b>6</b>  | 583.34        | 292.18                | 565.33               | 283.17                 | <b>V</b> | <b>831.51</b>  | 416.26                | 814.48               | 407.74                 |                      |                        | <b>7</b>  |
| <b>7</b>  | 696.43        | 348.72                | 678.42               | 339.71                 | <b>L</b> | <b>732.44</b>  | 366.72                | 715.41               | 358.21                 |                      |                        | <b>6</b>  |
| <b>8</b>  | 809.51        | 405.26                | 791.50               | 396.25                 | <b>L</b> | <b>619.36</b>  | 310.18                | <b>602.33</b>        | 301.67                 |                      |                        | <b>5</b>  |
| <b>9</b>  | 906.57        | 453.79                | 888.56               | 444.78                 | <b>P</b> | <b>506.27</b>  | 253.64                | <b>489.25</b>        | 245.13                 |                      |                        | <b>4</b>  |
| <b>10</b> | 977.60        | 489.31                | 959.59               | 480.30                 | <b>A</b> | 409.22         | 205.11                | 392.19               | 196.60                 |                      |                        | <b>3</b>  |
| <b>11</b> | 1140.67       | 570.84                | 1122.66              | 561.83                 | <b>Y</b> | 338.18         | 169.59                | <b>321.16</b>        | 161.08                 |                      |                        | <b>2</b>  |
| <b>12</b> |               |                       |                      |                        | <b>R</b> | <b>175.12</b>  | 88.06                 | 158.09               | 79.55                  |                      |                        | <b>1</b>  |



MS/MS Fragmentation of ID841 **ALFNNFSYR**

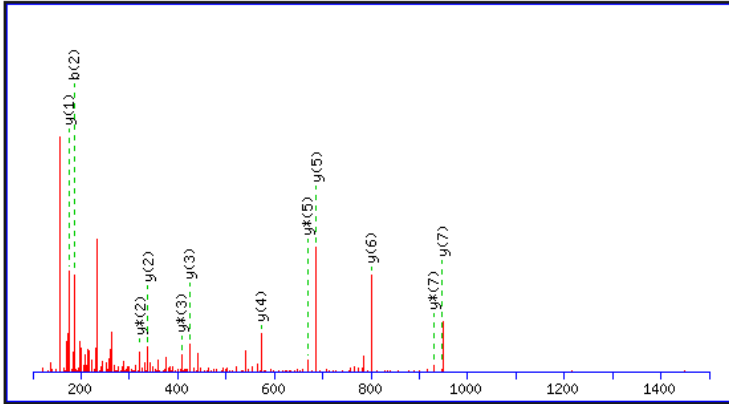

| #        | <b>b</b>      | <b>b<sup>++</sup></b> | <b>b*</b> | <b>b<sup>*++</sup></b> | <b>b<sup>0</sup></b> | <b>b<sup>0++</sup></b> | Seq.     | <b>y</b>      | <b>y<sup>++</sup></b> | <b>y*</b>     | <b>y<sup>*++</sup></b> | <b>y<sup>0</sup></b> | <b>y<sup>0++</sup></b> | #        |
|----------|---------------|-----------------------|-----------|------------------------|----------------------|------------------------|----------|---------------|-----------------------|---------------|------------------------|----------------------|------------------------|----------|
| <b>1</b> | 72.04         | 36.53                 |           |                        |                      |                        | <b>A</b> |               |                       |               |                        |                      |                        | <b>9</b> |
| <b>2</b> | <b>185.13</b> | 93.07                 |           |                        |                      |                        | <b>L</b> | 1060.52       | 530.76                | 1043.49       | 522.25                 | 1042.51              | 521.76                 | <b>8</b> |
| <b>3</b> | 332.20        | 166.60                |           |                        |                      |                        | <b>F</b> | <b>947.44</b> | 474.22                | <b>930.41</b> | 465.71                 | 929.43               | 465.22                 | <b>7</b> |
| <b>4</b> | 446.24        | 223.62                | 429.21    | 215.11                 |                      |                        | <b>N</b> | <b>800.37</b> | 400.69                | 783.34        | 392.17                 | 782.36               | 391.68                 | <b>6</b> |
| <b>5</b> | 560.28        | 280.64                | 543.26    | 272.13                 |                      |                        | <b>N</b> | <b>686.33</b> | 343.67                | <b>669.30</b> | 335.15                 | 668.32               | 334.66                 | <b>5</b> |
| <b>6</b> | 707.35        | 354.18                | 690.32    | 345.67                 |                      |                        | <b>F</b> | <b>572.28</b> | 286.64                | 555.26        | 278.13                 | 554.27               | 277.64                 | <b>4</b> |
| <b>7</b> | 794.38        | 397.70                | 777.36    | 389.18                 | 776.37               | 388.69                 | <b>S</b> | <b>425.21</b> | 213.11                | <b>408.19</b> | 204.60                 | 407.20               | 204.11                 | <b>3</b> |
| <b>8</b> | 957.45        | 479.23                | 940.42    | 470.71                 | 939.44               | 470.22                 | <b>Y</b> | <b>338.18</b> | 169.59                | <b>321.16</b> | 161.08                 |                      |                        | <b>2</b> |
| <b>9</b> |               |                       |           |                        |                      |                        | <b>R</b> | <b>175.12</b> | 88.06                 | 158.09        | 79.55                  |                      |                        | <b>1</b> |

MS/MS Fragmentation of ID843 **PSSSFGASLATPK**

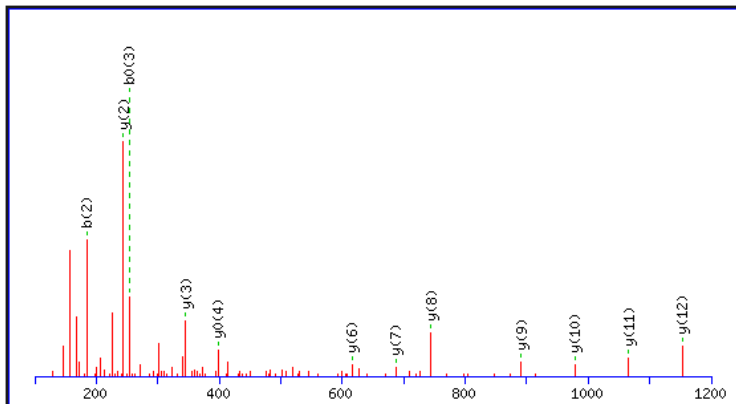

| #         | <b>b</b>      | <b>b<sup>++</sup></b> | <b>b<sup>0</sup></b> | <b>b<sup>0++</sup></b> | Seq.     | <b>y</b>       | <b>y<sup>++</sup></b> | <b>y<sup>*</sup></b> | <b>y<sup>*++</sup></b> | <b>y<sup>0</sup></b> | <b>y<sup>0++</sup></b> | #         |
|-----------|---------------|-----------------------|----------------------|------------------------|----------|----------------|-----------------------|----------------------|------------------------|----------------------|------------------------|-----------|
| <b>1</b>  | 98.06         | 49.53                 |                      |                        | <b>P</b> |                |                       |                      |                        |                      |                        | <b>13</b> |
| <b>2</b>  | <b>185.09</b> | 93.05                 | 167.08               | 84.04                  | <b>S</b> | <b>1152.59</b> | 576.80                | 1135.56              | 568.29                 | 1134.58              | 567.79                 | <b>12</b> |
| <b>3</b>  | 272.12        | 136.57                | <b>254.11</b>        | 127.56                 | <b>S</b> | <b>1065.56</b> | 533.28                | 1048.53              | 524.77                 | 1047.55              | 524.28                 | <b>11</b> |
| <b>4</b>  | 359.16        | 180.08                | 341.15               | 171.08                 | <b>S</b> | <b>978.53</b>  | 489.77                | 961.50               | 481.25                 | 960.51               | 480.76                 | <b>10</b> |
| <b>5</b>  | 506.22        | 253.62                | 488.21               | 244.61                 | <b>F</b> | <b>891.49</b>  | 446.25                | 874.47               | 437.74                 | 873.48               | 437.25                 | <b>9</b>  |
| <b>6</b>  | 563.25        | 282.13                | 545.24               | 273.12                 | <b>G</b> | <b>744.43</b>  | 372.72                | 727.40               | 364.20                 | 726.41               | 363.71                 | <b>8</b>  |
| <b>7</b>  | 634.28        | 317.65                | 616.27               | 308.64                 | <b>A</b> | <b>687.40</b>  | 344.21                | 670.38               | 335.69                 | 669.39               | 335.20                 | <b>7</b>  |
| <b>8</b>  | 721.32        | 361.16                | 703.30               | 352.16                 | <b>S</b> | <b>616.37</b>  | 308.69                | 599.34               | 300.17                 | 598.36               | 299.68                 | <b>6</b>  |
| <b>9</b>  | 834.40        | 417.70                | 816.39               | 408.70                 | <b>L</b> | 529.33         | 265.17                | 512.31               | 256.66                 | 511.32               | 256.17                 | <b>5</b>  |
| <b>10</b> | 905.44        | 453.22                | 887.43               | 444.22                 | <b>A</b> | 416.25         | 208.63                | 399.22               | 200.12                 | <b>398.24</b>        | 199.62                 | <b>4</b>  |
| <b>11</b> | 1006.48       | 503.75                | 988.47               | 494.74                 | <b>T</b> | <b>345.21</b>  | 173.11                | 328.19               | 164.60                 | 327.20               | 164.10                 | <b>3</b>  |
| <b>12</b> | 1103.54       | 552.27                | 1085.53              | 543.27                 | <b>P</b> | <b>244.17</b>  | 122.59                | 227.14               | 114.07                 |                      |                        | <b>2</b>  |
| <b>13</b> |               |                       |                      |                        | <b>K</b> | 147.11         | 74.06                 | 130.09               | 65.55                  |                      |                        | <b>1</b>  |

MS/MS Fragmentation of ID844 **SFVDEIR**

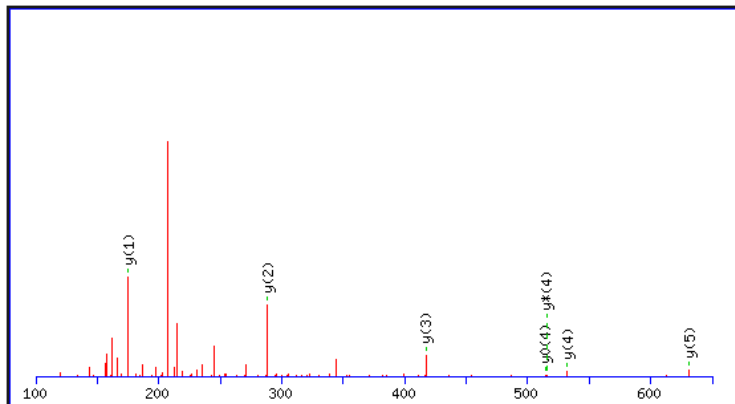

| #        | <b>b</b> | <b>b<sup>++</sup></b> | <b>b<sup>0</sup></b> | <b>b<sup>0++</sup></b> | <b>Seq.</b> | <b>y</b>      | <b>y<sup>++</sup></b> | <b>y<sup>*</sup></b> | <b>y<sup>+++</sup></b> | <b>y<sup>0</sup></b> | <b>y<sup>0++</sup></b> | #        |
|----------|----------|-----------------------|----------------------|------------------------|-------------|---------------|-----------------------|----------------------|------------------------|----------------------|------------------------|----------|
| <b>1</b> | 88.04    | 44.52                 | 70.03                | 35.52                  | <b>S</b>    |               |                       |                      |                        |                      |                        | <b>7</b> |
| <b>2</b> | 235.11   | 118.06                | 217.10               | 109.05                 | <b>F</b>    | 778.41        | 389.71                | 761.38               | 381.20                 | 760.40               | 380.70                 | <b>6</b> |
| <b>3</b> | 334.18   | 167.59                | 316.17               | 158.59                 | <b>V</b>    | <b>631.34</b> | 316.17                | 614.31               | 307.66                 | 613.33               | 307.17                 | <b>5</b> |
| <b>4</b> | 449.20   | 225.11                | 431.19               | 216.10                 | <b>D</b>    | <b>532.27</b> | 266.64                | <b>515.25</b>        | 258.13                 | <b>514.26</b>        | 257.63                 | <b>4</b> |
| <b>5</b> | 578.25   | 289.63                | 560.24               | 280.62                 | <b>E</b>    | <b>417.25</b> | 209.13                | 400.22               | 200.61                 | 399.24               | 200.12                 | <b>3</b> |
| <b>6</b> | 691.33   | 346.17                | 673.32               | 337.16                 | <b>I</b>    | <b>288.20</b> | 144.61                | 271.18               | 136.09                 |                      |                        | <b>2</b> |
| <b>7</b> |          |                       |                      |                        | <b>R</b>    | <b>175.12</b> | 88.06                 | 158.09               | 79.55                  |                      |                        | <b>1</b> |

MS/MS Fragmentation of ID859 **ALLIDLEPR**

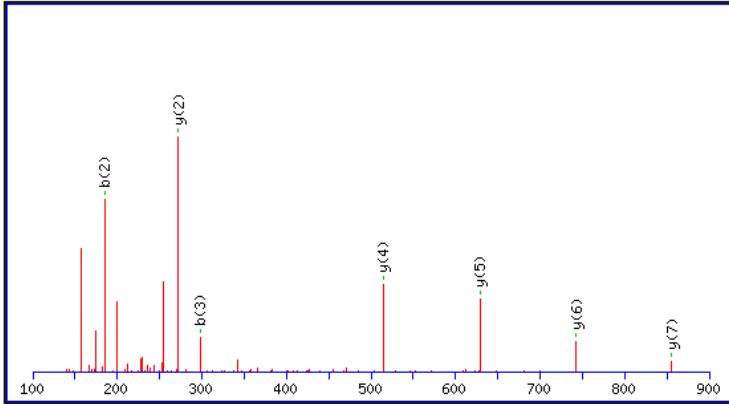

| # | <b>b</b>      | <b>b<sup>++</sup></b> | <b>b<sup>0</sup></b> | <b>b<sup>0++</sup></b> | <b>Seq.</b> | <b>y</b>      | <b>y<sup>++</sup></b> | <b>y<sup>*</sup></b> | <b>y<sup>+++</sup></b> | <b>y<sup>0</sup></b> | <b>y<sup>0++</sup></b> | #        |
|---|---------------|-----------------------|----------------------|------------------------|-------------|---------------|-----------------------|----------------------|------------------------|----------------------|------------------------|----------|
| 1 | 72.04         | 36.53                 |                      |                        | <b>A</b>    |               |                       |                      |                        |                      |                        | <b>9</b> |
| 2 | <b>185.13</b> | 93.07                 |                      |                        | <b>L</b>    | 968.58        | 484.79                | 951.55               | 476.28                 | 950.57               | 475.79                 | <b>8</b> |
| 3 | <b>298.21</b> | 149.61                |                      |                        | <b>L</b>    | <b>855.49</b> | 428.25                | 838.47               | 419.74                 | 837.48               | 419.25                 | <b>7</b> |
| 4 | 411.30        | 206.15                |                      |                        | <b>I</b>    | <b>742.41</b> | 371.71                | 725.38               | 363.20                 | 724.40               | 362.70                 | <b>6</b> |
| 5 | 526.32        | 263.67                | 508.31               | 254.66                 | <b>D</b>    | <b>629.33</b> | 315.17                | 612.30               | 306.65                 | 611.31               | 306.16                 | <b>5</b> |
| 6 | 639.41        | 320.21                | 621.40               | 311.20                 | <b>L</b>    | <b>514.30</b> | 257.65                | 497.27               | 249.14                 | 496.29               | 248.65                 | <b>4</b> |
| 7 | 768.45        | 384.73                | 750.44               | 375.72                 | <b>E</b>    | 401.21        | 201.11                | 384.19               | 192.60                 | 383.20               | 192.11                 | <b>3</b> |
| 8 | 865.50        | 433.26                | 847.49               | 424.25                 | <b>P</b>    | <b>272.17</b> | 136.59                | 255.15               | 128.08                 |                      |                        | <b>2</b> |
| 9 |               |                       |                      |                        | <b>R</b>    | 175.12        | 88.06                 | 158.09               | 79.55                  |                      |                        | <b>1</b> |

MS/MS Fragmentation of ID872 **ENVSSALEAAR**

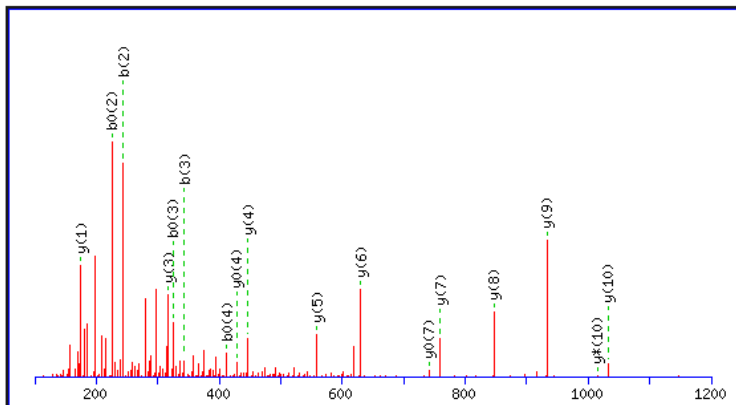

| #         | <b>b</b>      | <b>b<sup>++</sup></b> | <b>b*</b> | <b>b<sup>*++</sup></b> | <b>b<sup>0</sup></b> | <b>b<sup>0++</sup></b> | Seq.     | <b>y</b>       | <b>y<sup>++</sup></b> | <b>y*</b>      | <b>y<sup>*++</sup></b> | <b>y<sup>0</sup></b> | <b>y<sup>0++</sup></b> | #         |
|-----------|---------------|-----------------------|-----------|------------------------|----------------------|------------------------|----------|----------------|-----------------------|----------------|------------------------|----------------------|------------------------|-----------|
| <b>1</b>  | 130.05        | 65.53                 |           |                        | 112.04               | 56.52                  | <b>E</b> |                |                       |                |                        |                      |                        | <b>12</b> |
| <b>2</b>  | <b>244.09</b> | 122.55                | 227.07    | 114.04                 | <b>226.08</b>        | 113.54                 | <b>N</b> | 1146.57        | 573.79                | 1129.55        | 565.28                 | 1128.56              | 564.79                 | <b>11</b> |
| <b>3</b>  | <b>343.16</b> | 172.08                | 326.13    | 163.57                 | <b>325.15</b>        | 163.08                 | <b>V</b> | <b>1032.53</b> | 516.77                | <b>1015.51</b> | 508.26                 | 1014.52              | 507.76                 | <b>10</b> |
| <b>4</b>  | 430.19        | 215.60                | 413.17    | 207.09                 | <b>412.18</b>        | 206.59                 | <b>S</b> | <b>933.46</b>  | 467.24                | 916.44         | 458.72                 | 915.45               | 458.23                 | <b>9</b>  |
| <b>5</b>  | 517.23        | 259.12                | 500.20    | 250.60                 | 499.21               | 250.11                 | <b>S</b> | <b>846.43</b>  | 423.72                | 829.41         | 415.21                 | 828.42               | 414.71                 | <b>8</b>  |
| <b>6</b>  | 646.27        | 323.64                | 629.24    | 315.12                 | 628.26               | 314.63                 | <b>E</b> | <b>759.40</b>  | 380.20                | 742.37         | 371.69                 | <b>741.39</b>        | 371.20                 | <b>7</b>  |
| <b>7</b>  | 717.30        | 359.16                | 700.28    | 350.64                 | 699.29               | 350.15                 | <b>A</b> | <b>630.36</b>  | 315.68                | 613.33         | 307.17                 | 612.35               | 306.68                 | <b>6</b>  |
| <b>8</b>  | 830.39        | 415.70                | 813.36    | 407.18                 | 812.38               | 406.69                 | <b>L</b> | <b>559.32</b>  | 280.16                | 542.29         | 271.65                 | 541.31               | 271.16                 | <b>5</b>  |
| <b>9</b>  | 959.43        | 480.22                | 942.41    | 471.71                 | 941.42               | 471.21                 | <b>E</b> | <b>446.24</b>  | 223.62                | 429.21         | 215.11                 | <b>428.23</b>        | 214.62                 | <b>4</b>  |
| <b>10</b> | 1030.47       | 515.74                | 1013.44   | 507.22                 | 1012.46              | 506.73                 | <b>A</b> | <b>317.19</b>  | 159.10                | 300.17         | 150.59                 |                      |                        | <b>3</b>  |
| <b>11</b> | 1101.51       | 551.26                | 1084.48   | 542.74                 | 1083.50              | 542.25                 | <b>A</b> | 246.16         | 123.58                | 229.13         | 115.07                 |                      |                        | <b>2</b>  |
| <b>12</b> |               |                       |           |                        |                      |                        | <b>R</b> | <b>175.12</b>  | 88.06                 | 158.09         | 79.55                  |                      |                        | <b>1</b>  |

MS/MS Fragmentation of ID878 **SEIEYYAMLAK**

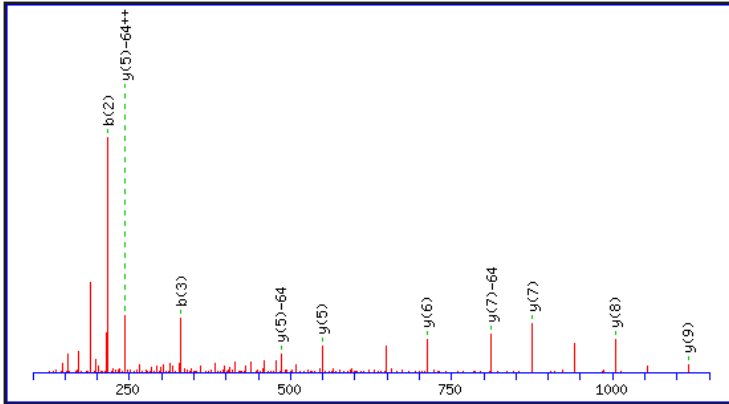

| #         | <b>b</b>      | <b>b<sup>++</sup></b> | <b>b<sup>0</sup></b> | <b>b<sup>0++</sup></b> | Seq.     | <b>y</b>      | <b>y<sup>++</sup></b> | <b>y<sup>*</sup></b> | <b>y<sup>*++</sup></b> | <b>y<sup>0</sup></b> | <b>y<sup>0++</sup></b> | #         |
|-----------|---------------|-----------------------|----------------------|------------------------|----------|---------------|-----------------------|----------------------|------------------------|----------------------|------------------------|-----------|
| <b>1</b>  | 88.04         | 44.52                 | 70.03                | 35.52                  | <b>S</b> |               |                       |                      |                        |                      |                        | <b>11</b> |
| <b>2</b>  | <b>217.08</b> | 109.04                | 199.07               | 100.04                 | <b>E</b> | 1182.60       | 591.81                | 1165.58              | 583.29                 | 1164.59              | 582.80                 | <b>10</b> |
| <b>3</b>  | <b>330.17</b> | 165.59                | 312.16               | 156.58                 | <b>I</b> | 1053.56       | 527.28                | 1036.54              | 518.77                 | 1035.55              | 518.28                 | <b>9</b>  |
| <b>4</b>  | 459.21        | 230.11                | 441.20               | 221.10                 | <b>E</b> | 940.48        | 470.74                | 923.45               | 462.23                 | 922.47               | 461.74                 | <b>8</b>  |
| <b>5</b>  | 622.27        | 311.64                | 604.26               | 302.63                 | <b>Y</b> | <b>811.43</b> | 406.22                | 794.41               | 397.71                 |                      |                        | <b>7</b>  |
| <b>6</b>  | 785.34        | 393.17                | 767.32               | 384.17                 | <b>Y</b> | 648.37        | 324.69                | 631.35               | 316.18                 |                      |                        | <b>6</b>  |
| <b>7</b>  | 856.37        | 428.69                | 838.36               | 419.68                 | <b>A</b> | <b>485.31</b> | <b>243.16</b>         | 468.28               | 234.64                 |                      |                        | <b>5</b>  |
| <b>8</b>  | 939.41        | 470.21                | 921.40               | 461.20                 | <b>M</b> | 414.27        | 207.64                | 397.24               | 199.13                 |                      |                        | <b>4</b>  |
| <b>9</b>  | 1052.49       | 526.75                | 1034.48              | 517.75                 | <b>L</b> | 331.23        | 166.12                | 314.21               | 157.61                 |                      |                        | <b>3</b>  |
| <b>10</b> | 1123.53       | 562.27                | 1105.52              | 553.26                 | <b>A</b> | 218.15        | 109.58                | 201.12               | 101.07                 |                      |                        | <b>2</b>  |
| <b>11</b> |               |                       |                      |                        | <b>K</b> | 147.11        | 74.06                 | 130.09               | 65.55                  |                      |                        | <b>1</b>  |

MS/MS Fragmentation of ID886 **QLPSGLLLVTGPFK**

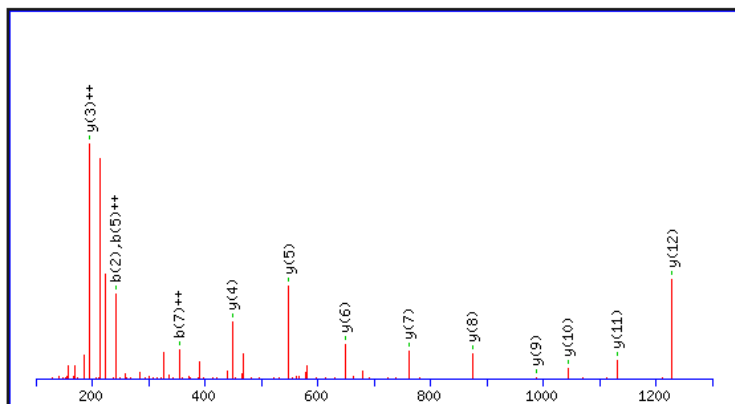

| #  | b             | b <sup>++</sup> | b <sup>*</sup> | b <sup>*++</sup> | b <sup>0</sup> | b <sup>0++</sup> | Seq. | y              | y <sup>++</sup> | y <sup>*</sup> | y <sup>*++</sup> | y <sup>0</sup> | y <sup>0++</sup> | #  |
|----|---------------|-----------------|----------------|------------------|----------------|------------------|------|----------------|-----------------|----------------|------------------|----------------|------------------|----|
| 1  | 129.07        | 65.04           | 112.04         | 56.52            |                |                  | Q    |                |                 |                |                  |                |                  | 14 |
| 2  | <b>242.15</b> | 121.58          | 225.12         | 113.07           |                |                  | L    | 1341.81        | 671.41          | 1324.79        | 662.90           | 1323.80        | 662.41           | 13 |
| 3  | 339.20        | 170.10          | 322.18         | 161.59           |                |                  | P    | <b>1228.73</b> | 614.87          | 1211.70        | 606.36           | 1210.72        | 605.86           | 12 |
| 4  | 426.23        | 213.62          | 409.21         | 205.11           | 408.22         | 204.62           | S    | <b>1131.68</b> | 566.34          | 1114.65        | 557.83           | 1113.67        | 557.34           | 11 |
| 5  | 483.26        | <b>242.13</b>   | 466.23         | 233.62           | 465.25         | 233.13           | G    | <b>1044.65</b> | 522.83          | 1027.62        | 514.31           | 1026.63        | 513.82           | 10 |
| 6  | 596.34        | 298.67          | 579.31         | 290.16           | 578.33         | 289.67           | L    | <b>987.62</b>  | 494.32          | 970.60         | 485.80           | 969.61         | 485.31           | 9  |
| 7  | 709.42        | <b>355.22</b>   | 692.40         | 346.70           | 691.41         | 346.21           | L    | <b>874.54</b>  | 437.77          | 857.51         | 429.26           | 856.53         | 428.77           | 8  |
| 8  | 822.51        | 411.76          | 805.48         | 403.24           | 804.50         | 402.75           | L    | <b>761.46</b>  | 381.23          | 744.43         | 372.72           | 743.45         | 372.23           | 7  |
| 9  | 921.58        | 461.29          | 904.55         | 452.78           | 903.57         | 452.29           | V    | <b>648.37</b>  | 324.69          | 631.34         | 316.18           | 630.36         | 315.68           | 6  |
| 10 | 1022.62       | 511.82          | 1005.60        | 503.30           | 1004.61        | 502.81           | T    | <b>549.30</b>  | 275.16          | 532.28         | 266.64           | 531.29         | 266.15           | 5  |
| 11 | 1079.65       | 540.33          | 1062.62        | 531.81           | 1061.64        | 531.32           | G    | <b>448.26</b>  | 224.63          | 431.23         | 216.12           |                |                  | 4  |
| 12 | 1176.70       | 588.85          | 1159.67        | 580.34           | 1158.69        | 579.85           | P    | 391.23         | <b>196.12</b>   | 374.21         | 187.61           |                |                  | 3  |
| 13 | 1323.77       | 662.39          | 1306.74        | 653.87           | 1305.76        | 653.38           | F    | 294.18         | 147.59          | 277.15         | 139.08           |                |                  | 2  |
| 14 |               |                 |                |                  |                |                  | K    | 147.11         | 74.06           | 130.09         | 65.55            |                |                  | 1  |

MS/MS Fragmentation of ID887 **SIESVPELK**

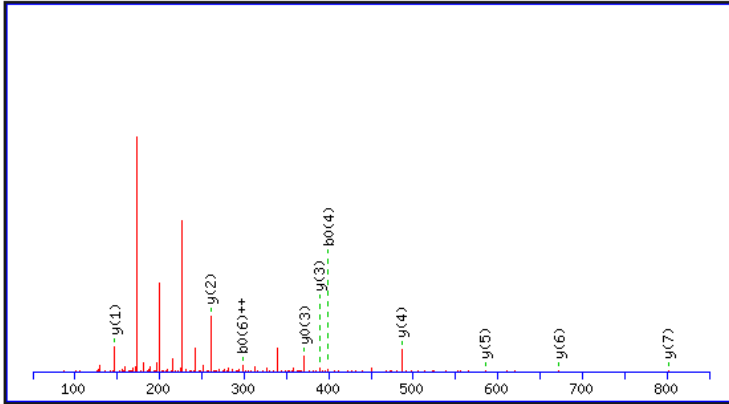

| #        | <b>b</b> | <b>b<sup>++</sup></b> | <b>b<sup>0</sup></b> | <b>b<sup>0++</sup></b> | Seq.     | <b>y</b>      | <b>y<sup>++</sup></b> | <b>y<sup>*</sup></b> | <b>y<sup>+++</sup></b> | <b>y<sup>0</sup></b> | <b>y<sup>0++</sup></b> | #        |
|----------|----------|-----------------------|----------------------|------------------------|----------|---------------|-----------------------|----------------------|------------------------|----------------------|------------------------|----------|
| <b>1</b> | 88.04    | 44.52                 | 70.03                | 35.52                  | <b>S</b> |               |                       |                      |                        |                      |                        | <b>9</b> |
| <b>2</b> | 201.12   | 101.07                | 183.11               | 92.06                  | <b>I</b> | 914.52        | 457.76                | 897.49               | 449.25                 | 896.51               | 448.76                 | <b>8</b> |
| <b>3</b> | 330.17   | 165.59                | 312.16               | 156.58                 | <b>E</b> | <b>801.44</b> | 401.22                | 784.41               | 392.71                 | 783.42               | 392.22                 | <b>7</b> |
| <b>4</b> | 417.20   | 209.10                | <b>399.19</b>        | 200.10                 | <b>S</b> | <b>672.39</b> | 336.70                | 655.37               | 328.19                 | 654.38               | 327.69                 | <b>6</b> |
| <b>5</b> | 516.27   | 258.64                | 498.26               | 249.63                 | <b>V</b> | <b>585.36</b> | 293.18                | 568.33               | 284.67                 | 567.35               | 284.18                 | <b>5</b> |
| <b>6</b> | 613.32   | 307.16                | 595.31               | <b>298.16</b>          | <b>P</b> | <b>486.29</b> | 243.65                | 469.27               | 235.14                 | 468.28               | 234.64                 | <b>4</b> |
| <b>7</b> | 742.36   | 371.68                | 724.35               | 362.68                 | <b>E</b> | <b>389.24</b> | 195.12                | 372.21               | 186.61                 | <b>371.23</b>        | 186.12                 | <b>3</b> |
| <b>8</b> | 855.45   | 428.23                | 837.44               | 419.22                 | <b>L</b> | <b>260.20</b> | 130.60                | 243.17               | 122.09                 |                      |                        | <b>2</b> |
| <b>9</b> |          |                       |                      |                        | <b>K</b> | <b>147.11</b> | 74.06                 | 130.09               | 65.55                  |                      |                        | <b>1</b> |



MS/MS Fragmentation of ID892 **FVTAVVGF GK**

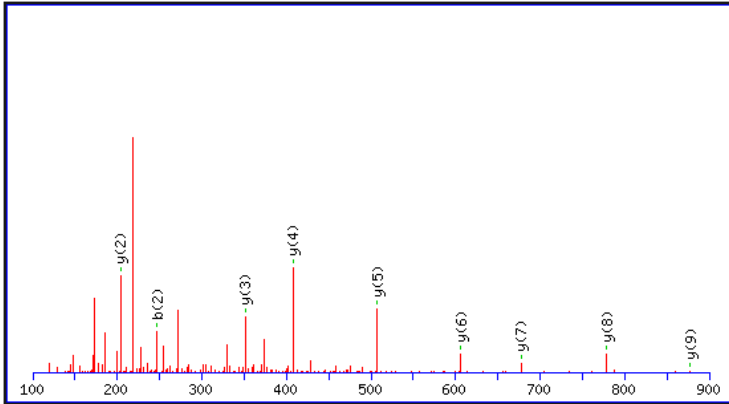

| #         | <b>b</b>      | <b>b<sup>++</sup></b> | <b>b<sup>0</sup></b> | <b>b<sup>0++</sup></b> | Seq.     | <b>y</b>      | <b>y<sup>++</sup></b> | <b>y<sup>*</sup></b> | <b>y<sup>*++</sup></b> | <b>y<sup>0</sup></b> | <b>y<sup>0++</sup></b> | #         |
|-----------|---------------|-----------------------|----------------------|------------------------|----------|---------------|-----------------------|----------------------|------------------------|----------------------|------------------------|-----------|
| <b>1</b>  | 148.08        | 74.54                 |                      |                        | <b>F</b> |               |                       |                      |                        |                      |                        | <b>10</b> |
| <b>2</b>  | <b>247.14</b> | 124.08                |                      |                        | <b>V</b> | <b>877.51</b> | 439.26                | 860.49               | 430.75                 | 859.50               | 430.26                 | <b>9</b>  |
| <b>3</b>  | 348.19        | 174.60                | 330.18               | 165.59                 | <b>T</b> | <b>778.45</b> | 389.73                | 761.42               | 381.21                 | 760.44               | 380.72                 | <b>8</b>  |
| <b>4</b>  | 419.23        | 210.12                | 401.22               | 201.11                 | <b>A</b> | <b>677.40</b> | 339.20                | 660.37               | 330.69                 |                      |                        | <b>7</b>  |
| <b>5</b>  | 518.30        | 259.65                | 500.29               | 250.65                 | <b>V</b> | <b>606.36</b> | 303.68                | 589.33               | 295.17                 |                      |                        | <b>6</b>  |
| <b>6</b>  | 617.37        | 309.19                | 599.36               | 300.18                 | <b>V</b> | <b>507.29</b> | 254.15                | 490.27               | 245.64                 |                      |                        | <b>5</b>  |
| <b>7</b>  | 674.39        | 337.70                | 656.38               | 328.69                 | <b>G</b> | <b>408.22</b> | 204.62                | 391.20               | 196.10                 |                      |                        | <b>4</b>  |
| <b>8</b>  | 821.46        | 411.23                | 803.45               | 402.23                 | <b>F</b> | <b>351.20</b> | 176.10                | 334.18               | 167.59                 |                      |                        | <b>3</b>  |
| <b>9</b>  | 878.48        | 439.74                | 860.47               | 430.74                 | <b>G</b> | <b>204.13</b> | 102.57                | 187.11               | 94.06                  |                      |                        | <b>2</b>  |
| <b>10</b> |               |                       |                      |                        | <b>K</b> | 147.11        | 74.06                 | 130.09               | 65.55                  |                      |                        | <b>1</b>  |

MS/MS Fragmentation of ID894 **QYHAFILASESVIK**

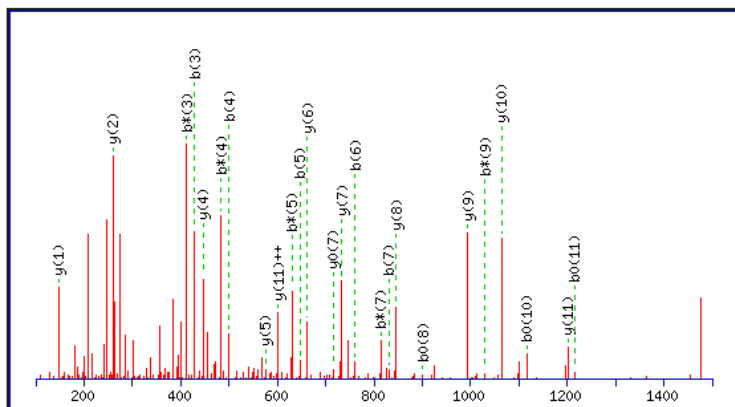

| #  | b             | b <sup>++</sup> | b <sup>*</sup> | b <sup>*++</sup> | b <sup>0</sup> | b <sup>0++</sup> | Seq. | y              | y <sup>++</sup> | y <sup>*</sup> | y <sup>*++</sup> | y <sup>0</sup> | y <sup>0++</sup> | #  |
|----|---------------|-----------------|----------------|------------------|----------------|------------------|------|----------------|-----------------|----------------|------------------|----------------|------------------|----|
| 1  | 129.07        | 65.04           | 112.04         | 56.52            |                |                  | Q    |                |                 |                |                  |                |                  | 13 |
| 2  | 292.13        | 146.57          | 275.10         | 138.05           |                |                  | Y    | 1364.72        | 682.86          | 1347.69        | 674.35           | 1346.71        | 673.86           | 12 |
| 3  | <b>429.19</b> | 215.10          | <b>412.16</b>  | 206.58           |                |                  | H    | <b>1201.66</b> | <b>601.33</b>   | 1184.63        | 592.82           | 1183.65        | 592.33           | 11 |
| 4  | <b>500.23</b> | 250.62          | <b>483.20</b>  | 242.10           |                |                  | A    | <b>1064.60</b> | 532.80          | 1047.57        | 524.29           | 1046.59        | 523.80           | 10 |
| 5  | <b>647.29</b> | 324.15          | <b>630.27</b>  | 315.64           |                |                  | F    | <b>993.56</b>  | 497.28          | 976.53         | 488.77           | 975.55         | 488.28           | 9  |
| 6  | <b>760.38</b> | 380.69          | 743.35         | 372.18           |                |                  | L    | <b>846.49</b>  | 423.75          | 829.47         | 415.24           | 828.48         | 414.74           | 8  |
| 7  | <b>831.41</b> | 416.21          | <b>814.39</b>  | 407.70           |                |                  | A    | <b>733.41</b>  | 367.21          | 716.38         | 358.69           | <b>715.40</b>  | 358.20           | 7  |
| 8  | 918.45        | 459.73          | 901.42         | 451.21           | <b>900.44</b>  | 450.72           | S    | <b>662.37</b>  | 331.69          | 645.35         | 323.18           | 644.36         | 322.68           | 6  |
| 9  | 1047.49       | 524.25          | <b>1030.46</b> | 515.74           | 1029.48        | 515.24           | E    | <b>575.34</b>  | 288.17          | 558.31         | 279.66           | 557.33         | 279.17           | 5  |
| 10 | 1134.52       | 567.76          | 1117.49        | 559.25           | <b>1116.51</b> | 558.76           | S    | <b>446.30</b>  | 223.65          | 429.27         | 215.14           | 428.29         | 214.65           | 4  |
| 11 | 1233.59       | 617.30          | 1216.56        | 608.79           | <b>1215.58</b> | 608.29           | V    | 359.27         | 180.14          | 342.24         | 171.62           |                |                  | 3  |
| 12 | 1346.67       | 673.84          | 1329.65        | 665.33           | 1328.66        | 664.84           | I    | <b>260.20</b>  | 130.60          | 243.17         | 122.09           |                |                  | 2  |
| 13 |               |                 |                |                  |                |                  | K    | <b>147.11</b>  | 74.06           | 130.09         | 65.55            |                |                  | 1  |

MS/MS Fragmentation of ID896 **DFGEDTEALNVIQQHVK**

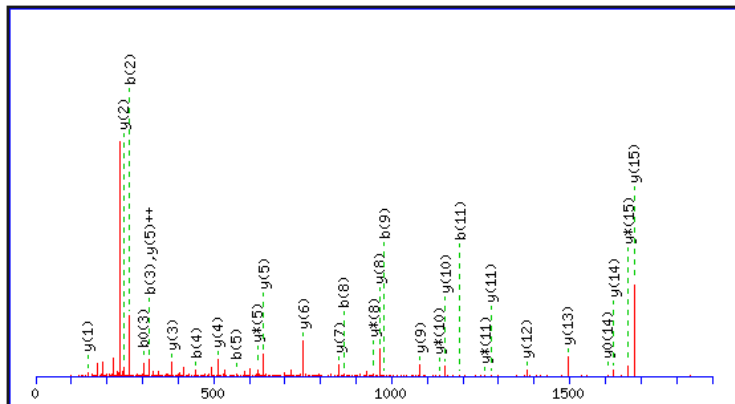

| #  | b              | b <sup>++</sup> | b <sup>*</sup> | b <sup>*++</sup> | b <sup>0</sup> | b <sup>0++</sup> | Seq. | y              | y <sup>++</sup> | y <sup>*</sup> | y <sup>*++</sup> | y <sup>0</sup> | y <sup>0++</sup> | #  |
|----|----------------|-----------------|----------------|------------------|----------------|------------------|------|----------------|-----------------|----------------|------------------|----------------|------------------|----|
| 1  | 116.03         | 58.52           |                |                  | 98.02          | 49.52            | D    |                |                 |                |                  |                |                  | 17 |
| 2  | <b>263.10</b>  | 132.05          |                |                  | 245.09         | 123.05           | F    | 1827.92        | 914.47          | 1810.90        | 905.95           | 1809.91        | 905.46           | 16 |
| 3  | <b>320.12</b>  | 160.57          |                |                  | <b>302.11</b>  | 151.56           | G    | <b>1680.86</b> | 840.93          | <b>1663.83</b> | 832.42           | 1662.84        | 831.93           | 15 |
| 4  | <b>449.17</b>  | 225.09          |                |                  | 431.16         | 216.08           | E    | <b>1623.83</b> | 812.42          | 1606.81        | 803.91           | <b>1605.82</b> | 803.42           | 14 |
| 5  | <b>564.19</b>  | 282.60          |                |                  | 546.18         | 273.60           | D    | <b>1494.79</b> | 747.90          | 1477.76        | 739.39           | 1476.78        | 738.89           | 13 |
| 6  | 665.24         | 333.12          |                |                  | 647.23         | 324.12           | T    | <b>1379.76</b> | 690.39          | 1362.74        | 681.87           | 1361.75        | 681.38           | 12 |
| 7  | 794.28         | 397.65          |                |                  | 776.27         | 388.64           | E    | <b>1278.72</b> | 639.86          | <b>1261.69</b> | 631.35           | 1260.71        | 630.86           | 11 |
| 8  | <b>865.32</b>  | 433.16          |                |                  | 847.31         | 424.16           | A    | <b>1149.67</b> | 575.34          | <b>1132.65</b> | 566.83           |                |                  | 10 |
| 9  | <b>978.41</b>  | 489.71          |                |                  | 960.39         | 480.70           | L    | <b>1078.64</b> | 539.82          | 1061.61        | 531.31           |                |                  | 9  |
| 10 | 1092.45        | 546.73          | 1075.42        | 538.21           | 1074.44        | 537.72           | N    | <b>965.55</b>  | 483.28          | <b>948.53</b>  | 474.77           |                |                  | 8  |
| 11 | <b>1191.52</b> | 596.26          | 1174.49        | 587.75           | 1173.51        | 587.26           | V    | <b>851.51</b>  | 426.26          | 834.48         | 417.75           |                |                  | 7  |
| 12 | 1304.60        | 652.80          | 1287.57        | 644.29           | 1286.59        | 643.80           | I    | <b>752.44</b>  | 376.72          | 735.41         | 368.21           |                |                  | 6  |
| 13 | 1432.66        | 716.83          | 1415.63        | 708.32           | 1414.65        | 707.83           | Q    | <b>639.36</b>  | <b>320.18</b>   | <b>622.33</b>  | 311.67           |                |                  | 5  |
| 14 | 1560.72        | 780.86          | 1543.69        | 772.35           | 1542.71        | 771.86           | Q    | <b>511.30</b>  | 256.15          | 494.27         | 247.64           |                |                  | 4  |
| 15 | 1697.78        | 849.39          | 1680.75        | 840.88           | 1679.77        | 840.39           | H    | <b>383.24</b>  | 192.12          | 366.21         | 183.61           |                |                  | 3  |
| 16 | 1796.84        | 898.93          | 1779.82        | 890.41           | 1778.83        | 889.92           | V    | <b>246.18</b>  | 123.59          | 229.15         | 115.08           |                |                  | 2  |
| 17 |                |                 |                |                  |                |                  | K    | <b>147.11</b>  | 74.06           | 130.09         | 65.55            |                |                  | 1  |

MS/MS Fragmentation of ID904 **QIHEIKDFLLTAR**

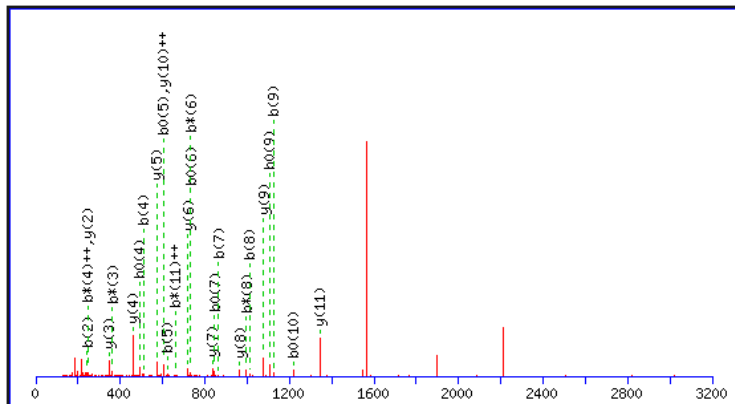

| #  | b              | b <sup>++</sup> | b*            | b <sup>+++</sup> | b <sup>0</sup> | b <sup>0++</sup> | Seq. | y              | y <sup>++</sup> | y*      | y <sup>+++</sup> | y <sup>0</sup> | y <sup>0++</sup> | #  |
|----|----------------|-----------------|---------------|------------------|----------------|------------------|------|----------------|-----------------|---------|------------------|----------------|------------------|----|
| 1  | 129.07         | 65.04           | 112.04        | 56.52            |                |                  | Q    |                |                 |         |                  |                |                  | 13 |
| 2  | <b>242.15</b>  | 121.58          | 225.12        | 113.07           |                |                  | I    | 1455.83        | 728.42          | 1438.81 | 719.91           | 1437.82        | 719.41           | 12 |
| 3  | 379.21         | 190.11          | <b>362.18</b> | 181.59           |                |                  | H    | <b>1342.75</b> | 671.88          | 1325.72 | 663.36           | 1324.74        | 662.87           | 11 |
| 4  | <b>508.25</b>  | 254.63          | 491.22        | <b>246.12</b>    | <b>490.24</b>  | 245.62           | E    | 1205.69        | <b>603.35</b>   | 1188.66 | 594.83           | 1187.68        | 594.34           | 10 |
| 5  | <b>621.34</b>  | 311.17          | 604.31        | 302.66           | <b>603.32</b>  | 302.17           | I    | <b>1076.65</b> | 538.83          | 1059.62 | 530.31           | 1058.64        | 529.82           | 9  |
| 6  | 749.43         | 375.22          | <b>732.40</b> | 366.71           | <b>731.42</b>  | 366.21           | K    | <b>963.56</b>  | 482.28          | 946.54  | 473.77           | 945.55         | 473.28           | 8  |
| 7  | <b>864.46</b>  | 432.73          | 847.43        | 424.22           | <b>846.45</b>  | 423.73           | D    | <b>835.47</b>  | 418.24          | 818.44  | 409.72           | 817.46         | 409.23           | 7  |
| 8  | <b>1011.53</b> | 506.27          | <b>994.50</b> | 497.75           | 993.52         | 497.26           | F    | <b>720.44</b>  | 360.72          | 703.41  | 352.21           | 702.43         | 351.72           | 6  |
| 9  | <b>1124.61</b> | 562.81          | 1107.58       | 554.30           | <b>1106.60</b> | 553.80           | L    | <b>573.37</b>  | 287.19          | 556.35  | 278.68           | 555.36         | 278.18           | 5  |
| 10 | 1237.69        | 619.35          | 1220.67       | 610.84           | <b>1219.68</b> | 610.35           | L    | <b>460.29</b>  | 230.65          | 443.26  | 222.13           | 442.28         | 221.64           | 4  |
| 11 | 1338.74        | 669.87          | 1321.72       | <b>661.36</b>    | 1320.73        | 660.87           | T    | <b>347.20</b>  | 174.11          | 330.18  | 165.59           | 329.19         | 165.10           | 3  |
| 12 | 1409.78        | 705.39          | 1392.75       | 696.88           | 1391.77        | 696.39           | A    | <b>246.16</b>  | 123.58          | 229.13  | 115.07           |                |                  | 2  |
| 13 |                |                 |               |                  |                |                  | R    | 175.12         | 88.06           | 158.09  | 79.55            |                |                  | 1  |

MS/MS Fragmentation of ID910 **STGFGLIYDSVESAK**

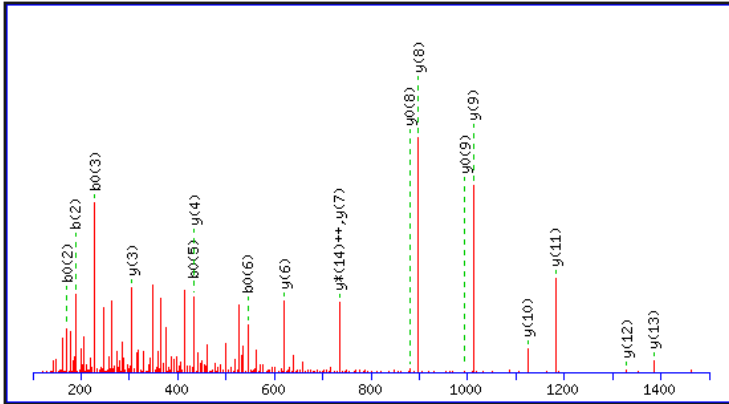

| #         | b             | b <sup>++</sup> | b <sup>0</sup> | b <sup>0++</sup> | Seq.     | y              | y <sup>++</sup> | y*      | y <sup>*++</sup> | y <sup>0</sup> | y <sup>0++</sup> | #         |
|-----------|---------------|-----------------|----------------|------------------|----------|----------------|-----------------|---------|------------------|----------------|------------------|-----------|
| <b>1</b>  | 88.04         | 44.52           | 70.03          | 35.52            | <b>S</b> |                |                 |         |                  |                |                  | <b>15</b> |
| <b>2</b>  | <b>189.09</b> | 95.05           | <b>171.08</b>  | 86.04            | <b>T</b> | 1486.74        | 743.87          | 1469.72 | <b>735.36</b>    | 1468.73        | 734.87           | <b>14</b> |
| <b>3</b>  | 246.11        | 123.56          | <b>228.10</b>  | 114.55           | <b>G</b> | <b>1385.69</b> | 693.35          | 1368.67 | 684.84           | 1367.68        | 684.35           | <b>13</b> |
| <b>4</b>  | 393.18        | 197.09          | 375.17         | 188.09           | <b>F</b> | <b>1328.67</b> | 664.84          | 1311.65 | 656.33           | 1310.66        | 655.83           | <b>12</b> |
| <b>5</b>  | 450.20        | 225.60          | <b>432.19</b>  | 216.60           | <b>G</b> | <b>1181.60</b> | 591.31          | 1164.58 | 582.79           | 1163.59        | 582.30           | <b>11</b> |
| <b>6</b>  | 563.28        | 282.14          | <b>545.27</b>  | 273.14           | <b>L</b> | <b>1124.58</b> | 562.80          | 1107.56 | 554.28           | 1106.57        | 553.79           | <b>10</b> |
| <b>7</b>  | 676.37        | 338.69          | 658.36         | 329.68           | <b>I</b> | <b>1011.50</b> | 506.25          | 994.47  | 497.74           | <b>993.49</b>  | 497.25           | <b>9</b>  |
| <b>8</b>  | 839.43        | 420.22          | 821.42         | 411.21           | <b>Y</b> | <b>898.42</b>  | 449.71          | 881.39  | 441.20           | <b>880.40</b>  | 440.71           | <b>8</b>  |
| <b>9</b>  | 954.46        | 477.73          | 936.45         | 468.73           | <b>D</b> | <b>735.35</b>  | 368.18          | 718.33  | 359.67           | 717.34         | 359.17           | <b>7</b>  |
| <b>10</b> | 1041.49       | 521.25          | 1023.48        | 512.24           | <b>S</b> | <b>620.32</b>  | 310.67          | 603.30  | 302.15           | 602.31         | 301.66           | <b>6</b>  |
| <b>11</b> | 1140.56       | 570.78          | 1122.55        | 561.78           | <b>V</b> | 533.29         | 267.15          | 516.27  | 258.64           | 515.28         | 258.14           | <b>5</b>  |
| <b>12</b> | 1269.60       | 635.30          | 1251.59        | 626.30           | <b>E</b> | <b>434.22</b>  | 217.62          | 417.20  | 209.10           | 416.21         | 208.61           | <b>4</b>  |
| <b>13</b> | 1356.63       | 678.82          | 1338.62        | 669.81           | <b>S</b> | <b>305.18</b>  | 153.09          | 288.16  | 144.58           | 287.17         | 144.09           | <b>3</b>  |
| <b>14</b> | 1427.67       | 714.34          | 1409.66        | 705.33           | <b>A</b> | 218.15         | 109.58          | 201.12  | 101.07           |                |                  | <b>2</b>  |
| <b>15</b> |               |                 |                |                  | <b>K</b> | 147.11         | 74.06           | 130.09  | 65.55            |                |                  | <b>1</b>  |

MS/MS Fragmentation of ID926 **TLVDYLQDK**

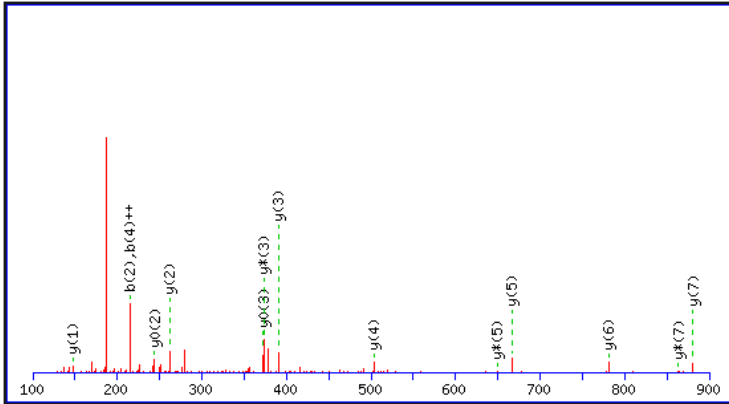

| # | <b>b</b>      | <b>b<sup>++</sup></b> | <b>b<sup>*</sup></b> | <b>b<sup>*++</sup></b> | <b>b<sup>0</sup></b> | <b>b<sup>0++</sup></b> | Seq. | <b>y</b>      | <b>y<sup>++</sup></b> | <b>y<sup>*</sup></b> | <b>y<sup>*++</sup></b> | <b>y<sup>0</sup></b> | <b>y<sup>0++</sup></b> | # |
|---|---------------|-----------------------|----------------------|------------------------|----------------------|------------------------|------|---------------|-----------------------|----------------------|------------------------|----------------------|------------------------|---|
| 1 | 102.05        | 51.53                 |                      |                        | 84.04                | 42.53                  | T    |               |                       |                      |                        |                      |                        | 9 |
| 2 | <b>215.14</b> | 108.07                |                      |                        | 197.13               | 99.07                  | L    | 993.53        | 497.27                | 976.50               | 488.75                 | 975.51               | 488.26                 | 8 |
| 3 | 314.21        | 157.61                |                      |                        | 296.20               | 148.60                 | V    | <b>880.44</b> | 440.72                | <b>863.41</b>        | 432.21                 | 862.43               | 431.72                 | 7 |
| 4 | 429.23        | <b>215.12</b>         |                      |                        | 411.22               | 206.12                 | D    | <b>781.37</b> | 391.19                | 764.35               | 382.68                 | 763.36               | 382.18                 | 6 |
| 5 | 592.30        | 296.65                |                      |                        | 574.29               | 287.65                 | Y    | <b>666.35</b> | 333.68                | <b>649.32</b>        | 325.16                 | 648.34               | 324.67                 | 5 |
| 6 | 705.38        | 353.19                |                      |                        | 687.37               | 344.19                 | L    | <b>503.28</b> | 252.14                | 486.26               | 243.63                 | 485.27               | 243.14                 | 4 |
| 7 | 833.44        | 417.22                | 816.41               | 408.71                 | 815.43               | 408.22                 | Q    | <b>390.20</b> | 195.60                | <b>373.17</b>        | 187.09                 | <b>372.19</b>        | 186.60                 | 3 |
| 8 | 948.47        | 474.74                | 931.44               | 466.22                 | 930.46               | 465.73                 | D    | <b>262.14</b> | 131.57                | 245.11               | 123.06                 | <b>244.13</b>        | 122.57                 | 2 |
| 9 |               |                       |                      |                        |                      |                        | K    | <b>147.11</b> | 74.06                 | 130.09               | 65.55                  |                      |                        | 1 |

MS/MS Fragmentation of ID929 **VIDLFSSADVVK**

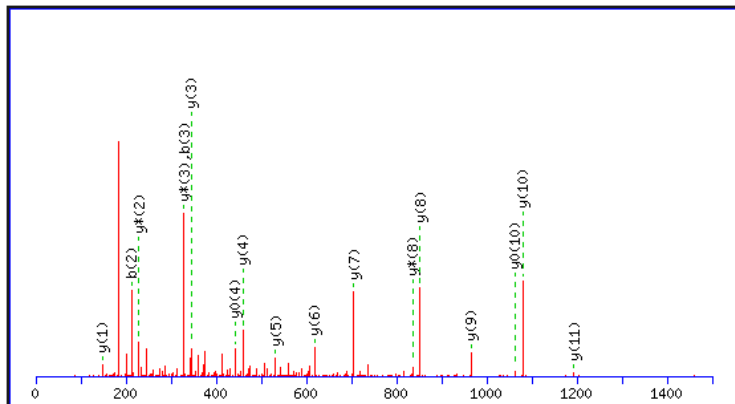

| #         | b             | b <sup>++</sup> | b <sup>0</sup> | b <sup>0++</sup> | Seq.     | y              | y <sup>++</sup> | y <sup>*</sup> | y <sup>*++</sup> | y <sup>0</sup> | y <sup>0++</sup> | #         |
|-----------|---------------|-----------------|----------------|------------------|----------|----------------|-----------------|----------------|------------------|----------------|------------------|-----------|
| <b>1</b>  | 100.08        | 50.54           |                |                  | <b>V</b> |                |                 |                |                  |                |                  | <b>12</b> |
| <b>2</b>  | <b>213.16</b> | 107.08          |                |                  | <b>I</b> | <b>1193.64</b> | 597.32          | 1176.61        | 588.81           | 1175.63        | 588.32           | <b>11</b> |
| <b>3</b>  | <b>328.19</b> | 164.60          | 310.18         | 155.59           | <b>D</b> | <b>1080.56</b> | 540.78          | 1063.53        | 532.27           | <b>1062.55</b> | 531.78           | <b>10</b> |
| <b>4</b>  | 441.27        | 221.14          | 423.26         | 212.13           | <b>L</b> | <b>965.53</b>  | 483.27          | 948.50         | 474.76           | 947.52         | 474.26           | <b>9</b>  |
| <b>5</b>  | 588.34        | 294.67          | 570.33         | 285.67           | <b>F</b> | <b>852.45</b>  | 426.73          | <b>835.42</b>  | 418.21           | 834.44         | 417.72           | <b>8</b>  |
| <b>6</b>  | 675.37        | 338.19          | 657.36         | 329.18           | <b>S</b> | <b>705.38</b>  | 353.19          | 688.35         | 344.68           | 687.37         | 344.19           | <b>7</b>  |
| <b>7</b>  | 762.40        | 381.71          | 744.39         | 372.70           | <b>S</b> | <b>618.35</b>  | 309.68          | 601.32         | 301.16           | 600.34         | 300.67           | <b>6</b>  |
| <b>8</b>  | 833.44        | 417.22          | 815.43         | 408.22           | <b>A</b> | <b>531.31</b>  | 266.16          | 514.29         | 257.65           | 513.30         | 257.16           | <b>5</b>  |
| <b>9</b>  | 948.47        | 474.74          | 930.46         | 465.73           | <b>D</b> | <b>460.28</b>  | 230.64          | 443.25         | 222.13           | <b>442.27</b>  | 221.64           | <b>4</b>  |
| <b>10</b> | 1047.54       | 524.27          | 1029.53        | 515.27           | <b>V</b> | <b>345.25</b>  | 173.13          | <b>328.22</b>  | 164.62           |                |                  | <b>3</b>  |
| <b>11</b> | 1146.60       | 573.81          | 1128.59        | 564.80           | <b>V</b> | 246.18         | 123.59          | <b>229.15</b>  | 115.08           |                |                  | <b>2</b>  |
| <b>12</b> |               |                 |                |                  | <b>K</b> | <b>147.11</b>  | 74.06           | 130.09         | 65.55            |                |                  | <b>1</b>  |

MS/MS Fragmentation of ID931 **TWENQPAR**

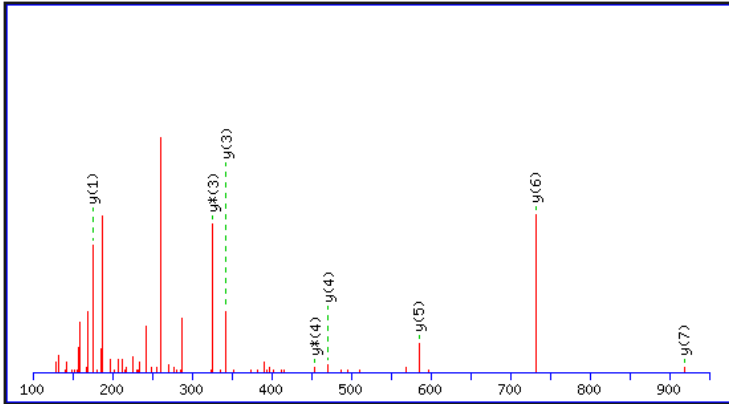

| #        | <b>b</b> | <b>b<sup>++</sup></b> | <b>b<sup>*</sup></b> | <b>b<sup>*++</sup></b> | <b>b<sup>0</sup></b> | <b>b<sup>0++</sup></b> | Seq.     | <b>y</b>      | <b>y<sup>++</sup></b> | <b>y<sup>*</sup></b> | <b>y<sup>*++</sup></b> | #        |
|----------|----------|-----------------------|----------------------|------------------------|----------------------|------------------------|----------|---------------|-----------------------|----------------------|------------------------|----------|
| <b>1</b> | 102.05   | 51.53                 |                      |                        | 84.04                | 42.53                  | <b>T</b> |               |                       |                      |                        | <b>8</b> |
| <b>2</b> | 288.13   | 144.57                |                      |                        | 270.12               | 135.57                 | <b>W</b> | <b>918.46</b> | 459.73                | 901.43               | 451.22                 | <b>7</b> |
| <b>3</b> | 435.20   | 218.10                |                      |                        | 417.19               | 209.10                 | <b>F</b> | <b>732.38</b> | 366.69                | 715.35               | 358.18                 | <b>6</b> |
| <b>4</b> | 549.25   | 275.13                | 532.22               | 266.61                 | 531.24               | 266.12                 | <b>N</b> | <b>585.31</b> | 293.16                | 568.28               | 284.65                 | <b>5</b> |
| <b>5</b> | 677.30   | 339.16                | 660.28               | 330.64                 | 659.29               | 330.15                 | <b>Q</b> | <b>471.27</b> | 236.14                | <b>454.24</b>        | 227.62                 | <b>4</b> |
| <b>6</b> | 774.36   | 387.68                | 757.33               | 379.17                 | 756.35               | 378.68                 | <b>P</b> | <b>343.21</b> | 172.11                | <b>326.18</b>        | 163.59                 | <b>3</b> |
| <b>7</b> | 845.39   | 423.20                | 828.37               | 414.69                 | 827.38               | 414.20                 | <b>A</b> | 246.16        | 123.58                | 229.13               | 115.07                 | <b>2</b> |
| <b>8</b> |          |                       |                      |                        |                      |                        | <b>R</b> | <b>175.12</b> | 88.06                 | 158.09               | 79.55                  | <b>1</b> |



MS/MS Fragmentation of ID938 **NIVEQAAVR**

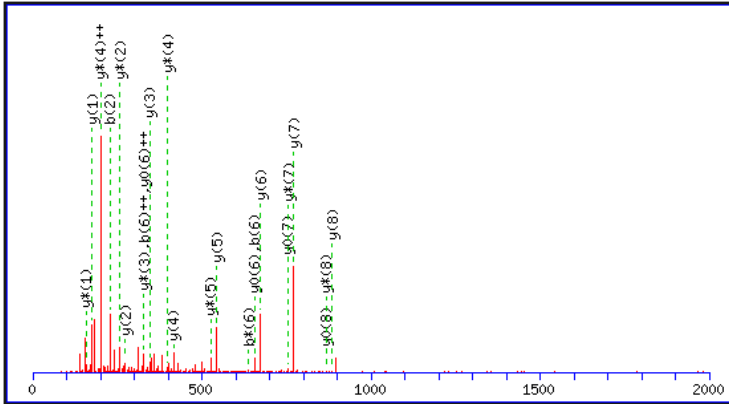

| #        | <b>b</b>      | <b>b<sup>++</sup></b> | <b>b<sup>*</sup></b> | <b>b<sup>*++</sup></b> | <b>b<sup>0</sup></b> | <b>b<sup>0++</sup></b> | Seq.     | <b>y</b>      | <b>y<sup>++</sup></b> | <b>y<sup>*</sup></b> | <b>y<sup>*++</sup></b> | <b>y<sup>0</sup></b> | <b>y<sup>0++</sup></b> | #        |
|----------|---------------|-----------------------|----------------------|------------------------|----------------------|------------------------|----------|---------------|-----------------------|----------------------|------------------------|----------------------|------------------------|----------|
| <b>1</b> | 115.05        | 58.03                 | 98.02                | 49.52                  |                      |                        | <b>N</b> |               |                       |                      |                        |                      |                        | <b>9</b> |
| <b>2</b> | <b>228.13</b> | 114.57                | 211.11               | 106.06                 |                      |                        | <b>I</b> | <b>885.52</b> | 443.26                | <b>868.49</b>        | 434.75                 | <b>867.50</b>        | 434.26                 | <b>8</b> |
| <b>3</b> | 327.20        | 164.10                | 310.18               | 155.59                 |                      |                        | <b>V</b> | <b>772.43</b> | 386.72                | <b>755.40</b>        | 378.21                 | <b>754.42</b>        | 377.71                 | <b>7</b> |
| <b>4</b> | 456.25        | 228.63                | 439.22               | 220.11                 | 438.23               | 219.62                 | <b>E</b> | <b>673.36</b> | 337.19                | 656.34               | 328.67                 | <b>655.35</b>        | <b>328.18</b>          | <b>6</b> |
| <b>5</b> | 584.30        | 292.66                | 567.28               | 284.14                 | 566.29               | 283.65                 | <b>Q</b> | <b>544.32</b> | 272.66                | <b>527.29</b>        | 264.15                 |                      |                        | <b>5</b> |
| <b>6</b> | <b>655.34</b> | <b>328.17</b>         | <b>638.31</b>        | 319.66                 | 637.33               | 319.17                 | <b>A</b> | <b>416.26</b> | 208.63                | <b>399.24</b>        | <b>200.12</b>          |                      |                        | <b>4</b> |
| <b>7</b> | 726.38        | 363.69                | 709.35               | 355.18                 | 708.37               | 354.69                 | <b>A</b> | <b>345.22</b> | 173.12                | <b>328.20</b>        | 164.60                 |                      |                        | <b>3</b> |
| <b>8</b> | 825.45        | 413.23                | 808.42               | 404.71                 | 807.44               | 404.22                 | <b>V</b> | <b>274.19</b> | 137.60                | <b>257.16</b>        | 129.08                 |                      |                        | <b>2</b> |
| <b>9</b> |               |                       |                      |                        |                      |                        | <b>R</b> | <b>175.12</b> | 88.06                 | <b>158.09</b>        | 79.55                  |                      |                        | <b>1</b> |

MS/MS Fragmentation of ID945 **AAQLDVVVTNK**

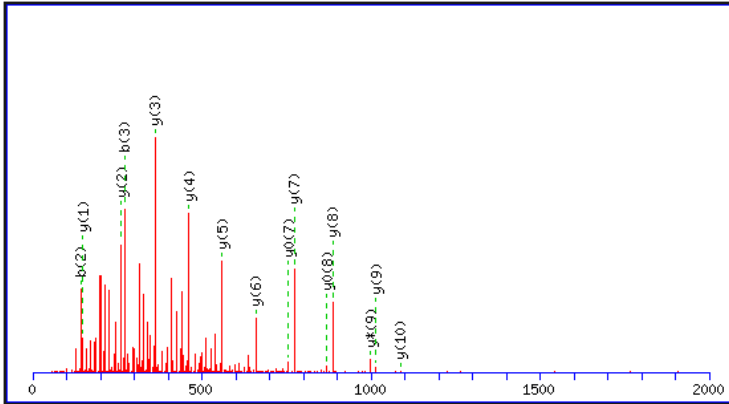

| #         | <b>b</b>      | <b>b<sup>++</sup></b> | <b>b<sup>*</sup></b> | <b>b<sup>*++</sup></b> | <b>b<sup>0</sup></b> | <b>b<sup>0++</sup></b> | Seq.     | <b>y</b>       | <b>y<sup>++</sup></b> | <b>y<sup>*</sup></b> | <b>y<sup>*++</sup></b> | <b>y<sup>0</sup></b> | <b>y<sup>0++</sup></b> | #         |
|-----------|---------------|-----------------------|----------------------|------------------------|----------------------|------------------------|----------|----------------|-----------------------|----------------------|------------------------|----------------------|------------------------|-----------|
| <b>1</b>  | 72.04         | 36.53                 |                      |                        |                      |                        | <b>A</b> |                |                       |                      |                        |                      |                        | <b>11</b> |
| <b>2</b>  | <b>143.08</b> | 72.04                 |                      |                        |                      |                        | <b>A</b> | <b>1086.62</b> | 543.81                | 1069.59              | 535.30                 | 1068.60              | 534.81                 | <b>10</b> |
| <b>3</b>  | <b>271.14</b> | 136.07                | 254.11               | 127.56                 |                      |                        | <b>Q</b> | <b>1015.58</b> | 508.29                | <b>998.55</b>        | 499.78                 | 997.57               | 499.29                 | <b>9</b>  |
| <b>4</b>  | 384.22        | 192.62                | 367.20               | 184.10                 |                      |                        | <b>L</b> | <b>887.52</b>  | 444.26                | 870.49               | 435.75                 | <b>869.51</b>        | 435.26                 | <b>8</b>  |
| <b>5</b>  | 499.25        | 250.13                | 482.22               | 241.62                 | 481.24               | 241.12                 | <b>D</b> | <b>774.44</b>  | 387.72                | 757.41               | 379.21                 | <b>756.43</b>        | 378.72                 | <b>7</b>  |
| <b>6</b>  | 598.32        | 299.66                | 581.29               | 291.15                 | 580.31               | 290.66                 | <b>V</b> | <b>659.41</b>  | 330.21                | 642.38               | 321.69                 | 641.40               | 321.20                 | <b>6</b>  |
| <b>7</b>  | 697.39        | 349.20                | 680.36               | 340.68                 | 679.38               | 340.19                 | <b>V</b> | <b>560.34</b>  | 280.67                | 543.31               | 272.16                 | 542.33               | 271.67                 | <b>5</b>  |
| <b>8</b>  | 796.46        | 398.73                | 779.43               | 390.22                 | 778.45               | 389.73                 | <b>V</b> | <b>461.27</b>  | 231.14                | 444.25               | 222.63                 | 443.26               | 222.13                 | <b>4</b>  |
| <b>9</b>  | 897.50        | 449.26                | 880.48               | 440.74                 | 879.49               | 440.25                 | <b>T</b> | <b>362.20</b>  | 181.61                | 345.18               | 173.09                 | 344.19               | 172.60                 | <b>3</b>  |
| <b>10</b> | 1011.55       | 506.28                | 994.52               | 497.76                 | 993.54               | 497.27                 | <b>N</b> | <b>261.16</b>  | 131.08                | 244.13               | 122.57                 |                      |                        | <b>2</b>  |
| <b>11</b> |               |                       |                      |                        |                      |                        | <b>K</b> | <b>147.11</b>  | 74.06                 | 130.09               | 65.55                  |                      |                        | <b>1</b>  |

MS/MS Fragmentation of ID950 **DAIEGTYIDKK**

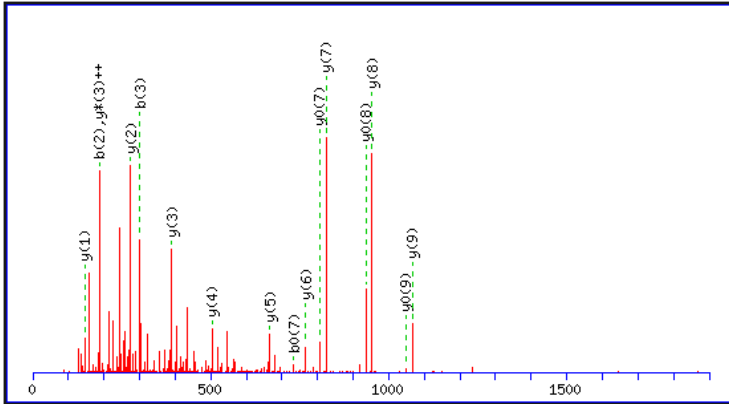

| #  | b             | b <sup>++</sup> | b*      | b <sup>*++</sup> | b <sup>0</sup> | b <sup>0++</sup> | Seq. | y              | y <sup>++</sup> | y*      | y <sup>*++</sup> | y <sup>0</sup> | y <sup>0++</sup> | #  |
|----|---------------|-----------------|---------|------------------|----------------|------------------|------|----------------|-----------------|---------|------------------|----------------|------------------|----|
| 1  | 116.03        | 58.52           |         |                  | 98.02          | 49.52            | D    |                |                 |         |                  |                |                  | 11 |
| 2  | <b>187.07</b> | 94.04           |         |                  | 169.06         | 85.03            | A    | 1137.61        | 569.31          | 1120.59 | 560.80           | 1119.60        | 560.31           | 10 |
| 3  | <b>300.16</b> | 150.58          |         |                  | 282.14         | 141.58           | I    | <b>1066.58</b> | 533.79          | 1049.55 | 525.28           | <b>1048.57</b> | 524.79           | 9  |
| 4  | 429.20        | 215.10          |         |                  | 411.19         | 206.10           | E    | <b>953.49</b>  | 477.25          | 936.47  | 468.74           | <b>935.48</b>  | 468.25           | 8  |
| 5  | 486.22        | 243.61          |         |                  | 468.21         | 234.61           | G    | <b>824.45</b>  | 412.73          | 807.42  | 404.22           | <b>806.44</b>  | 403.72           | 7  |
| 6  | 587.27        | 294.14          |         |                  | 569.26         | 285.13           | T    | <b>767.43</b>  | 384.22          | 750.40  | 375.71           | 749.42         | 375.21           | 6  |
| 7  | 750.33        | 375.67          |         |                  | <b>732.32</b>  | 366.66           | Y    | <b>666.38</b>  | 333.69          | 649.36  | 325.18           | 648.37         | 324.69           | 5  |
| 8  | 863.41        | 432.21          |         |                  | 845.40         | 423.21           | I    | <b>503.32</b>  | 252.16          | 486.29  | 243.65           | 485.31         | 243.16           | 4  |
| 9  | 978.44        | 489.72          |         |                  | 960.43         | 480.72           | D    | <b>390.23</b>  | 195.62          | 373.21  | <b>187.11</b>    | 372.22         | 186.62           | 3  |
| 10 | 1106.54       | 553.77          | 1089.51 | 545.26           | 1088.53        | 544.77           | K    | <b>275.21</b>  | 138.11          | 258.18  | 129.59           |                |                  | 2  |
| 11 |               |                 |         |                  |                |                  | K    | <b>147.11</b>  | 74.06           | 130.09  | 65.55            |                |                  | 1  |

MS/MS Fragmentation of ID960 **LVTPLTLQR**

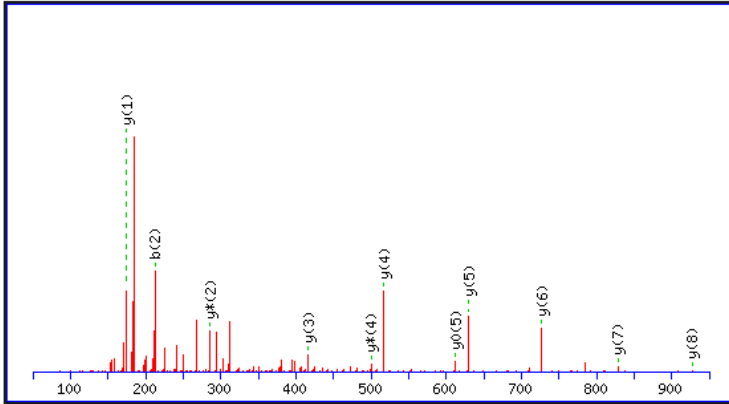

| #        | <b>b</b>      | <b>b<sup>++</sup></b> | <b>b<sup>*</sup></b> | <b>b<sup>*++</sup></b> | <b>b<sup>0</sup></b> | <b>b<sup>0++</sup></b> | Seq.     | <b>y</b>      | <b>y<sup>++</sup></b> | <b>y<sup>*</sup></b> | <b>y<sup>*++</sup></b> | <b>y<sup>0</sup></b> | <b>y<sup>0++</sup></b> | #        |
|----------|---------------|-----------------------|----------------------|------------------------|----------------------|------------------------|----------|---------------|-----------------------|----------------------|------------------------|----------------------|------------------------|----------|
| <b>1</b> | 114.09        | 57.55                 |                      |                        |                      |                        | <b>L</b> |               |                       |                      |                        |                      |                        | <b>9</b> |
| <b>2</b> | <b>213.16</b> | 107.08                |                      |                        |                      |                        | <b>V</b> | <b>927.56</b> | 464.28                | 910.54               | 455.77                 | 909.55               | 455.28                 | <b>8</b> |
| <b>3</b> | 314.21        | 157.61                |                      |                        | 296.20               | 148.60                 | <b>T</b> | <b>828.49</b> | 414.75                | 811.47               | 406.24                 | 810.48               | 405.75                 | <b>7</b> |
| <b>4</b> | 411.26        | 206.13                |                      |                        | 393.25               | 197.13                 | <b>P</b> | <b>727.45</b> | 364.23                | 710.42               | 355.71                 | 709.44               | 355.22                 | <b>6</b> |
| <b>5</b> | 524.34        | 262.68                |                      |                        | 506.33               | 253.67                 | <b>L</b> | <b>630.39</b> | 315.70                | 613.37               | 307.19                 | <b>612.38</b>        | 306.70                 | <b>5</b> |
| <b>6</b> | 625.39        | 313.20                |                      |                        | 607.38               | 304.19                 | <b>T</b> | <b>517.31</b> | 259.16                | <b>500.28</b>        | 250.64                 | 499.30               | 250.15                 | <b>4</b> |
| <b>7</b> | 738.48        | 369.74                |                      |                        | 720.47               | 360.74                 | <b>L</b> | <b>416.26</b> | 208.63                | 399.24               | 200.12                 |                      |                        | <b>3</b> |
| <b>8</b> | 866.53        | 433.77                | 849.51               | 425.26                 | 848.52               | 424.77                 | <b>Q</b> | 303.18        | 152.09                | <b>286.15</b>        | 143.58                 |                      |                        | <b>2</b> |
| <b>9</b> |               |                       |                      |                        |                      |                        | <b>R</b> | <b>175.12</b> | 88.06                 | 158.09               | 79.55                  |                      |                        | <b>1</b> |

MS/MS Fragmentation of ID972 **TYLNLPSEIVPATLK**

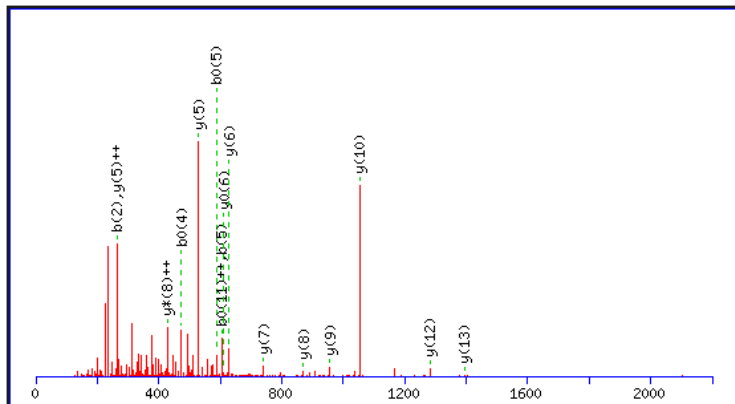

| #  | b             | b <sup>++</sup> | b <sup>*</sup> | b <sup>*++</sup> | b <sup>0</sup> | b <sup>0++</sup> | Seq. | y              | y <sup>++</sup> | y <sup>*</sup> | y <sup>*++</sup> | y <sup>0</sup> | y <sup>0++</sup> | #  |
|----|---------------|-----------------|----------------|------------------|----------------|------------------|------|----------------|-----------------|----------------|------------------|----------------|------------------|----|
| 1  | 102.05        | 51.53           |                |                  | 84.04          | 42.53            | T    |                |                 |                |                  |                |                  | 15 |
| 2  | <b>265.12</b> | 133.06          |                |                  | 247.11         | 124.06           | Y    | 1557.89        | 779.45          | 1540.86        | 770.93           | 1539.88        | 770.44           | 14 |
| 3  | 378.20        | 189.60          |                |                  | 360.19         | 180.60           | L    | <b>1394.83</b> | 697.92          | 1377.80        | 689.40           | 1376.81        | 688.91           | 13 |
| 4  | 492.25        | 246.63          | 475.22         | 238.11           | <b>474.23</b>  | 237.62           | N    | <b>1281.74</b> | 641.37          | 1264.71        | 632.86           | 1263.73        | 632.37           | 12 |
| 5  | <b>605.33</b> | 303.17          | 588.30         | 294.66           | <b>587.32</b>  | 294.16           | L    | 1167.70        | 584.35          | 1150.67        | 575.84           | 1149.69        | 575.35           | 11 |
| 6  | 702.38        | 351.69          | 685.36         | 343.18           | 684.37         | 342.69           | P    | <b>1054.61</b> | 527.81          | 1037.59        | 519.30           | 1036.60        | 518.81           | 10 |
| 7  | 789.41        | 395.21          | 772.39         | 386.70           | 771.40         | 386.21           | S    | <b>957.56</b>  | 479.28          | 940.53         | 470.77           | 939.55         | 470.28           | 9  |
| 8  | 918.46        | 459.73          | 901.43         | 451.22           | 900.45         | 450.73           | E    | <b>870.53</b>  | 435.77          | 853.50         | <b>427.26</b>    | 852.52         | 426.76           | 8  |
| 9  | 1031.54       | 516.27          | 1014.51        | 507.76           | 1013.53        | 507.27           | I    | <b>741.49</b>  | 371.25          | 724.46         | 362.73           | 723.48         | 362.24           | 7  |
| 10 | 1130.61       | 565.81          | 1113.58        | 557.29           | 1112.60        | 556.80           | V    | <b>628.40</b>  | 314.71          | 611.38         | 306.19           | <b>610.39</b>  | 305.70           | 6  |
| 11 | 1227.66       | 614.33          | 1210.64        | 605.82           | 1209.65        | <b>605.33</b>    | P    | <b>529.33</b>  | <b>265.17</b>   | 512.31         | 256.66           | 511.32         | 256.17           | 5  |
| 12 | 1298.70       | 649.85          | 1281.67        | 641.34           | 1280.69        | 640.85           | A    | 432.28         | 216.64          | 415.26         | 208.13           | 414.27         | 207.64           | 4  |
| 13 | 1399.75       | 700.38          | 1382.72        | 691.86           | 1381.74        | 691.37           | T    | 361.24         | 181.13          | 344.22         | 172.61           | 343.23         | 172.12           | 3  |
| 14 | 1512.83       | 756.92          | 1495.80        | 748.41           | 1494.82        | 747.91           | L    | 260.20         | 130.60          | 243.17         | 122.09           |                |                  | 2  |
| 15 |               |                 |                |                  |                |                  | K    | 147.11         | 74.06           | 130.09         | 65.55            |                |                  | 1  |

MS/MS Fragmentation of ID978 **EGDVLTLLESER**

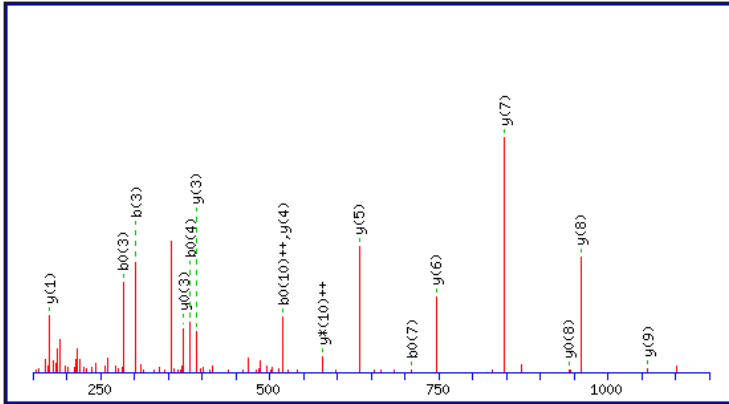

| #         | <b>b</b>      | <b>b<sup>++</sup></b> | <b>b<sup>0</sup></b> | <b>b<sup>0++</sup></b> | Seq.     | <b>y</b>       | <b>y<sup>++</sup></b> | <b>y<sup>*</sup></b> | <b>y<sup>*++</sup></b> | <b>y<sup>0</sup></b> | <b>y<sup>0++</sup></b> | #         |
|-----------|---------------|-----------------------|----------------------|------------------------|----------|----------------|-----------------------|----------------------|------------------------|----------------------|------------------------|-----------|
| <b>1</b>  | 130.05        | 65.53                 | 112.04               | 56.52                  | <b>E</b> |                |                       |                      |                        |                      |                        | <b>12</b> |
| <b>2</b>  | 187.07        | 94.04                 | 169.06               | 85.03                  | <b>G</b> | 1231.65        | 616.33                | 1214.63              | 607.82                 | 1213.64              | 607.32                 | <b>11</b> |
| <b>3</b>  | <b>302.10</b> | 151.55                | <b>284.09</b>        | 142.55                 | <b>D</b> | 1174.63        | 587.82                | 1157.60              | <b>579.31</b>          | 1156.62              | 578.81                 | <b>10</b> |
| <b>4</b>  | 401.17        | 201.09                | <b>383.16</b>        | 192.08                 | <b>V</b> | <b>1059.60</b> | 530.31                | 1042.58              | 521.79                 | 1041.59              | 521.30                 | <b>9</b>  |
| <b>5</b>  | 514.25        | 257.63                | 496.24               | 248.62                 | <b>L</b> | <b>960.54</b>  | 480.77                | 943.51               | 472.26                 | <b>942.53</b>        | 471.77                 | <b>8</b>  |
| <b>6</b>  | 615.30        | 308.15                | 597.29               | 299.15                 | <b>T</b> | <b>847.45</b>  | 424.23                | 830.43               | 415.72                 | 829.44               | 415.22                 | <b>7</b>  |
| <b>7</b>  | 728.38        | 364.69                | <b>710.37</b>        | 355.69                 | <b>L</b> | <b>746.40</b>  | 373.71                | 729.38               | 365.19                 | 728.39               | 364.70                 | <b>6</b>  |
| <b>8</b>  | 841.47        | 421.24                | 823.46               | 412.23                 | <b>L</b> | <b>633.32</b>  | 317.16                | 616.29               | 308.65                 | 615.31               | 308.16                 | <b>5</b>  |
| <b>9</b>  | 970.51        | 485.76                | 952.50               | 476.75                 | <b>E</b> | <b>520.24</b>  | 260.62                | 503.21               | 252.11                 | 502.23               | 251.62                 | <b>4</b>  |
| <b>10</b> | 1057.54       | 529.27                | 1039.53              | <b>520.27</b>          | <b>S</b> | <b>391.19</b>  | 196.10                | 374.17               | 187.59                 | <b>373.18</b>        | 187.10                 | <b>3</b>  |
| <b>11</b> | 1186.58       | 593.80                | 1168.57              | 584.79                 | <b>E</b> | 304.16         | 152.58                | 287.13               | 144.07                 | 286.15               | 143.58                 | <b>2</b>  |
| <b>12</b> |               |                       |                      |                        | <b>R</b> | <b>175.12</b>  | 88.06                 | 158.09               | 79.55                  |                      |                        | <b>1</b>  |

MS/MS Fragmentation of ID981 **LFFPYEPGK**

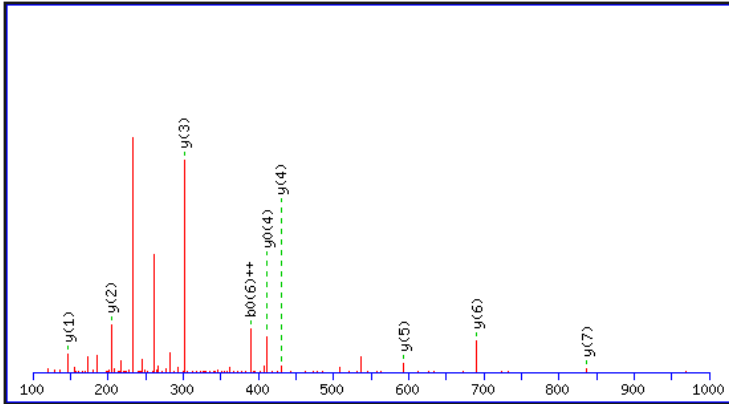

| #        | <b>b</b> | <b>b<sup>++</sup></b> | <b>b<sup>0</sup></b> | <b>b<sup>0++</sup></b> | Seq.     | <b>y</b>      | <b>y<sup>++</sup></b> | <b>y<sup>*</sup></b> | <b>y<sup>+++</sup></b> | <b>y<sup>0</sup></b> | <b>y<sup>0++</sup></b> | #        |
|----------|----------|-----------------------|----------------------|------------------------|----------|---------------|-----------------------|----------------------|------------------------|----------------------|------------------------|----------|
| <b>1</b> | 114.09   | 57.55                 |                      |                        | <b>L</b> |               |                       |                      |                        |                      |                        | <b>9</b> |
| <b>2</b> | 261.16   | 131.08                |                      |                        | <b>F</b> | 984.48        | 492.74                | 967.46               | 484.23                 | 966.47               | 483.74                 | <b>8</b> |
| <b>3</b> | 408.23   | 204.62                |                      |                        | <b>F</b> | <b>837.41</b> | 419.21                | 820.39               | 410.70                 | 819.40               | 410.21                 | <b>7</b> |
| <b>4</b> | 505.28   | 253.14                |                      |                        | <b>P</b> | <b>690.35</b> | 345.68                | 673.32               | 337.16                 | 672.34               | 336.67                 | <b>6</b> |
| <b>5</b> | 668.34   | 334.68                |                      |                        | <b>Y</b> | <b>593.29</b> | 297.15                | 576.27               | 288.64                 | 575.28               | 288.14                 | <b>5</b> |
| <b>6</b> | 797.39   | 399.20                | 779.38               | <b>390.19</b>          | <b>E</b> | <b>430.23</b> | 215.62                | 413.20               | 207.11                 | <b>412.22</b>        | 206.61                 | <b>4</b> |
| <b>7</b> | 894.44   | 447.72                | 876.43               | 438.72                 | <b>P</b> | <b>301.19</b> | 151.10                | 284.16               | 142.58                 |                      |                        | <b>3</b> |
| <b>8</b> | 951.46   | 476.23                | 933.45               | 467.23                 | <b>G</b> | <b>204.13</b> | 102.57                | 187.11               | 94.06                  |                      |                        | <b>2</b> |
| <b>9</b> |          |                       |                      |                        | <b>K</b> | <b>147.11</b> | 74.06                 | 130.09               | 65.55                  |                      |                        | <b>1</b> |

MS/MS Fragmentation of ID986 **VVSGINVFDPK**

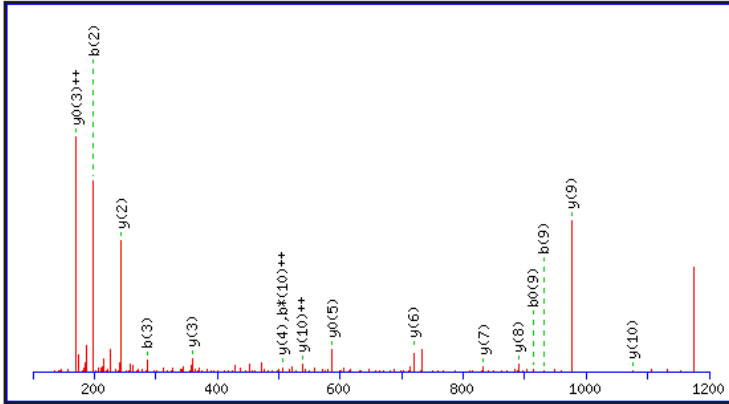

| #  | b             | b <sup>++</sup> | b*      | b <sup>*++</sup> | b <sup>0</sup> | b <sup>0++</sup> | Seq. | y              | y <sup>++</sup> | y*      | y <sup>*++</sup> | y <sup>0</sup> | y <sup>0++</sup> | #  |
|----|---------------|-----------------|---------|------------------|----------------|------------------|------|----------------|-----------------|---------|------------------|----------------|------------------|----|
| 1  | 100.08        | 50.54           |         |                  |                |                  | V    |                |                 |         |                  |                |                  | 11 |
| 2  | <b>199.14</b> | 100.08          |         |                  |                |                  | V    | <b>1075.58</b> | <b>538.29</b>   | 1058.55 | 529.78           | 1057.57        | 529.29           | 10 |
| 3  | <b>286.18</b> | 143.59          |         |                  | 268.17         | 134.59           | S    | <b>976.51</b>  | 488.76          | 959.48  | 480.25           | 958.50         | 479.75           | 9  |
| 4  | 343.20        | 172.10          |         |                  | 325.19         | 163.10           | G    | <b>889.48</b>  | 445.24          | 872.45  | 436.73           | 871.47         | 436.24           | 8  |
| 5  | 456.28        | 228.64          |         |                  | 438.27         | 219.64           | I    | <b>832.46</b>  | 416.73          | 815.43  | 408.22           | 814.45         | 407.73           | 7  |
| 6  | 570.32        | 285.67          | 553.30  | 277.15           | 552.31         | 276.66           | N    | <b>719.37</b>  | 360.19          | 702.35  | 351.68           | 701.36         | 351.18           | 6  |
| 7  | 669.39        | 335.20          | 652.37  | 326.69           | 651.38         | 326.19           | V    | 605.33         | 303.17          | 588.30  | 294.66           | <b>587.32</b>  | 294.16           | 5  |
| 8  | 816.46        | 408.73          | 799.43  | 400.22           | 798.45         | 399.73           | F    | <b>506.26</b>  | 253.63          | 489.23  | 245.12           | 488.25         | 244.63           | 4  |
| 9  | <b>931.49</b> | 466.25          | 914.46  | 457.73           | <b>913.48</b>  | 457.24           | D    | <b>359.19</b>  | 180.10          | 342.17  | 171.59           | 341.18         | <b>171.09</b>    | 3  |
| 10 | 1028.54       | 514.77          | 1011.51 | <b>506.26</b>    | 1010.53        | 505.77           | P    | <b>244.17</b>  | 122.59          | 227.14  | 114.07           |                |                  | 2  |
| 11 |               |                 |         |                  |                |                  | K    | 147.11         | 74.06           | 130.09  | 65.55            |                |                  | 1  |



MS/MS Fragmentation of ID987 **LEALEKLR**

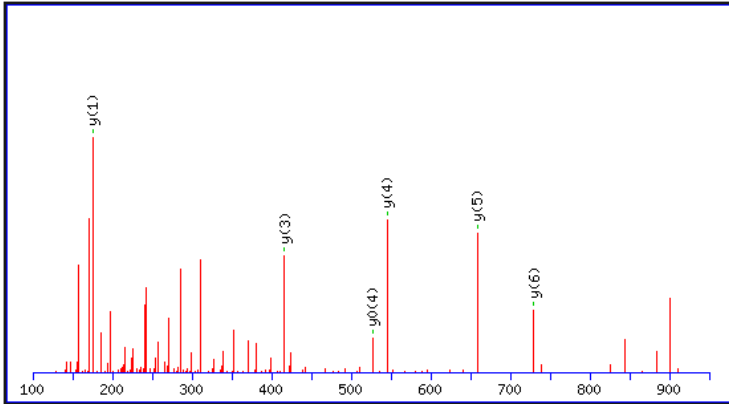

| #        | <b>b</b> | <b>b<sup>++</sup></b> | <b>b<sup>*</sup></b> | <b>b<sup>*++</sup></b> | <b>b<sup>0</sup></b> | <b>b<sup>0++</sup></b> | Seq.     | <b>y</b>      | <b>y<sup>++</sup></b> | <b>y<sup>*</sup></b> | <b>y<sup>*++</sup></b> | <b>y<sup>0</sup></b> | <b>y<sup>0++</sup></b> | #        |
|----------|----------|-----------------------|----------------------|------------------------|----------------------|------------------------|----------|---------------|-----------------------|----------------------|------------------------|----------------------|------------------------|----------|
| <b>1</b> | 156.10   | 78.55                 |                      |                        |                      |                        | <b>L</b> |               |                       |                      |                        |                      |                        | <b>8</b> |
| <b>2</b> | 285.14   | 143.08                |                      |                        | 267.13               | 134.07                 | <b>E</b> | 858.50        | 429.76                | 841.48               | 421.24                 | 840.49               | 420.75                 | <b>7</b> |
| <b>3</b> | 356.18   | 178.59                |                      |                        | 338.17               | 169.59                 | <b>A</b> | <b>729.46</b> | 365.23                | 712.44               | 356.72                 | 711.45               | 356.23                 | <b>6</b> |
| <b>4</b> | 469.27   | 235.14                |                      |                        | 451.26               | 226.13                 | <b>L</b> | <b>658.42</b> | 329.72                | 641.40               | 321.20                 | 640.41               | 320.71                 | <b>5</b> |
| <b>5</b> | 598.31   | 299.66                |                      |                        | 580.30               | 290.65                 | <b>E</b> | <b>545.34</b> | 273.17                | 528.31               | 264.66                 | <b>527.33</b>        | 264.17                 | <b>4</b> |
| <b>6</b> | 726.40   | 363.71                | 709.38               | 355.19                 | 708.39               | 354.70                 | <b>K</b> | <b>416.30</b> | 208.65                | 399.27               | 200.14                 |                      |                        | <b>3</b> |
| <b>7</b> | 839.49   | 420.25                | 822.46               | 411.73                 | 821.48               | 411.24                 | <b>L</b> | 288.20        | 144.61                | 271.18               | 136.09                 |                      |                        | <b>2</b> |
| <b>8</b> |          |                       |                      |                        |                      |                        | <b>R</b> | <b>175.12</b> | 88.06                 | 158.09               | 79.55                  |                      |                        | <b>1</b> |

MS/MS Fragmentation of ID988 **VPDGFYELYNR**

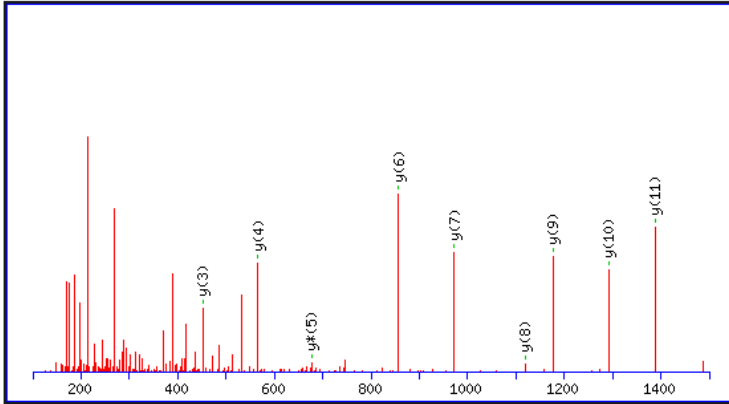

| #         | <b>b</b> | <b>b<sup>++</sup></b> | <b>b<sup>*</sup></b> | <b>b<sup>*++</sup></b> | <b>b<sup>0</sup></b> | <b>b<sup>0++</sup></b> | Seq.     | <b>y</b>       | <b>y<sup>++</sup></b> | <b>y<sup>*</sup></b> | <b>y<sup>*++</sup></b> | <b>y<sup>0</sup></b> | <b>y<sup>0++</sup></b> | #         |
|-----------|----------|-----------------------|----------------------|------------------------|----------------------|------------------------|----------|----------------|-----------------------|----------------------|------------------------|----------------------|------------------------|-----------|
| <b>1</b>  | 100.08   | 50.54                 |                      |                        |                      |                        | <b>V</b> |                |                       |                      |                        |                      |                        | <b>12</b> |
| <b>2</b>  | 197.13   | 99.07                 |                      |                        |                      |                        | <b>P</b> | <b>1388.61</b> | 694.81                | 1371.59              | 686.30                 | 1370.60              | 685.80                 | <b>11</b> |
| <b>3</b>  | 312.16   | 156.58                |                      |                        | 294.14               | 147.58                 | <b>D</b> | <b>1291.56</b> | 646.28                | 1274.53              | 637.77                 | 1273.55              | 637.28                 | <b>10</b> |
| <b>4</b>  | 369.18   | 185.09                |                      |                        | 351.17               | 176.09                 | <b>G</b> | <b>1176.53</b> | 588.77                | 1159.51              | 580.26                 | 1158.52              | 579.76                 | <b>9</b>  |
| <b>5</b>  | 516.25   | 258.63                |                      |                        | 498.23               | 249.62                 | <b>F</b> | <b>1119.51</b> | 560.26                | 1102.48              | 551.75                 | 1101.50              | 551.25                 | <b>8</b>  |
| <b>6</b>  | 631.27   | 316.14                |                      |                        | 613.26               | 307.13                 | <b>D</b> | <b>972.44</b>  | 486.72                | 955.42               | 478.21                 | 954.43               | 477.72                 | <b>7</b>  |
| <b>7</b>  | 794.34   | 397.67                |                      |                        | 776.32               | 388.67                 | <b>Y</b> | <b>857.42</b>  | 429.21                | 840.39               | 420.70                 | 839.40               | 420.21                 | <b>6</b>  |
| <b>8</b>  | 923.38   | 462.19                |                      |                        | 905.37               | 453.19                 | <b>E</b> | 694.35         | 347.68                | <b>677.33</b>        | 339.17                 | 676.34               | 338.67                 | <b>5</b>  |
| <b>9</b>  | 1036.46  | 518.73                |                      |                        | 1018.45              | 509.73                 | <b>L</b> | <b>565.31</b>  | 283.16                | 548.28               | 274.64                 |                      |                        | <b>4</b>  |
| <b>10</b> | 1199.53  | 600.27                |                      |                        | 1181.51              | 591.26                 | <b>Y</b> | <b>452.23</b>  | 226.62                | 435.20               | 218.10                 |                      |                        | <b>3</b>  |
| <b>11</b> | 1313.57  | 657.29                | 1296.54              | 648.77                 | 1295.56              | 648.28                 | <b>N</b> | 289.16         | 145.08                | 272.14               | 136.57                 |                      |                        | <b>2</b>  |
| <b>12</b> |          |                       |                      |                        |                      |                        | <b>R</b> | 175.12         | 88.06                 | 158.09               | 79.55                  |                      |                        | <b>1</b>  |

MS/MS Fragmentation of ID991 **ENYELGLPVIQK**

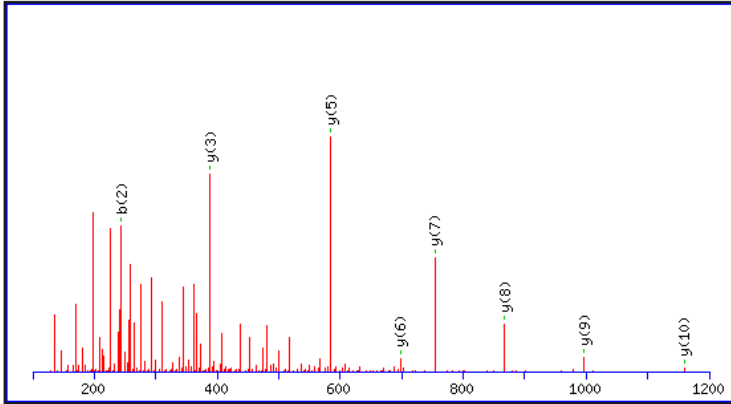

| #         | <b>b</b>      | <b>b<sup>++</sup></b> | <b>b<sup>*</sup></b> | <b>b<sup>*++</sup></b> | <b>b<sup>0</sup></b> | <b>b<sup>0++</sup></b> | Seq.     | <b>y</b>       | <b>y<sup>++</sup></b> | <b>y<sup>*</sup></b> | <b>y<sup>*++</sup></b> | <b>y<sup>0</sup></b> | <b>y<sup>0++</sup></b> | #         |
|-----------|---------------|-----------------------|----------------------|------------------------|----------------------|------------------------|----------|----------------|-----------------------|----------------------|------------------------|----------------------|------------------------|-----------|
| <b>1</b>  | 130.05        | 65.53                 |                      |                        | 112.04               | 56.52                  | <b>E</b> |                |                       |                      |                        |                      |                        | <b>12</b> |
| <b>2</b>  | <b>244.09</b> | 122.55                | 227.07               | 114.04                 | 226.08               | 113.54                 | <b>N</b> | 1273.72        | 637.36                | 1256.69              | 628.85                 | 1255.70              | 628.36                 | <b>11</b> |
| <b>3</b>  | 407.16        | 204.08                | 390.13               | 195.57                 | 389.15               | 195.08                 | <b>Y</b> | <b>1159.67</b> | 580.34                | 1142.65              | 571.83                 | 1141.66              | 571.33                 | <b>10</b> |
| <b>4</b>  | 536.20        | 268.60                | 519.17               | 260.09                 | 518.19               | 259.60                 | <b>E</b> | <b>996.61</b>  | 498.81                | 979.58               | 490.29                 | 978.60               | 489.80                 | <b>9</b>  |
| <b>5</b>  | 649.28        | 325.15                | 632.26               | 316.63                 | 631.27               | 316.14                 | <b>L</b> | <b>867.57</b>  | 434.29                | 850.54               | 425.77                 |                      |                        | <b>8</b>  |
| <b>6</b>  | 706.30        | 353.66                | 689.28               | 345.14                 | 688.29               | 344.65                 | <b>G</b> | <b>754.48</b>  | 377.74                | 737.46               | 369.23                 |                      |                        | <b>7</b>  |
| <b>7</b>  | 819.39        | 410.20                | 802.36               | 401.68                 | 801.38               | 401.19                 | <b>L</b> | <b>697.46</b>  | 349.23                | 680.43               | 340.72                 |                      |                        | <b>6</b>  |
| <b>8</b>  | 916.44        | 458.72                | 899.41               | 450.21                 | 898.43               | 449.72                 | <b>P</b> | <b>584.38</b>  | 292.69                | 567.35               | 284.18                 |                      |                        | <b>5</b>  |
| <b>9</b>  | 1015.51       | 508.26                | 998.48               | 499.75                 | 997.50               | 499.25                 | <b>V</b> | 487.32         | 244.17                | 470.30               | 235.65                 |                      |                        | <b>4</b>  |
| <b>10</b> | 1128.59       | 564.80                | 1111.57              | 556.29                 | 1110.58              | 555.80                 | <b>I</b> | <b>388.26</b>  | 194.63                | 371.23               | 186.12                 |                      |                        | <b>3</b>  |
| <b>11</b> | 1256.65       | 628.83                | 1239.63              | 620.32                 | 1238.64              | 619.82                 | <b>Q</b> | 275.17         | 138.09                | 258.14               | 129.58                 |                      |                        | <b>2</b>  |
| <b>12</b> |               |                       |                      |                        |                      |                        | <b>K</b> | 147.11         | 74.06                 | 130.09               | 65.55                  |                      |                        | <b>1</b>  |

MS/MS Fragmentation of ID996 **GFIFGPPIALAIGAK**

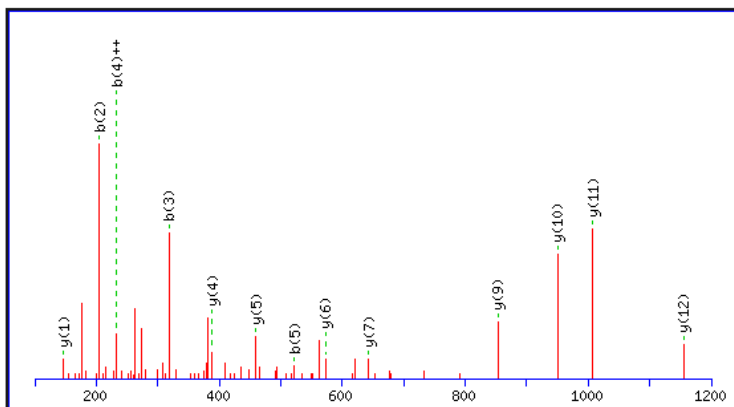

| #  | b       | b <sup>++</sup> | Seq. | y       | y <sup>++</sup> | y*      | y <sup>*++</sup> | #  |
|----|---------|-----------------|------|---------|-----------------|---------|------------------|----|
| 1  | 58.03   | 29.52           | G    |         |                 |         |                  | 15 |
| 2  | 205.10  | 103.05          | F    | 1414.85 | 707.93          | 1397.82 | 699.41           | 14 |
| 3  | 318.18  | 159.59          | I    | 1267.78 | 634.39          | 1250.75 | 625.88           | 13 |
| 4  | 465.25  | 233.13          | F    | 1154.69 | 577.85          | 1137.67 | 569.34           | 12 |
| 5  | 522.27  | 261.64          | G    | 1007.62 | 504.32          | 990.60  | 495.80           | 11 |
| 6  | 619.32  | 310.17          | P    | 950.60  | 475.81          | 933.58  | 467.29           | 10 |
| 7  | 716.38  | 358.69          | P    | 853.55  | 427.28          | 836.52  | 418.77           | 9  |
| 8  | 829.46  | 415.23          | I    | 756.50  | 378.75          | 739.47  | 370.24           | 8  |
| 9  | 900.50  | 450.75          | A    | 643.41  | 322.21          | 626.39  | 313.70           | 7  |
| 10 | 1013.58 | 507.29          | L    | 572.38  | 286.69          | 555.35  | 278.18           | 6  |
| 11 | 1084.62 | 542.81          | A    | 459.29  | 230.15          | 442.27  | 221.64           | 5  |
| 12 | 1197.70 | 599.36          | I    | 388.26  | 194.63          | 371.23  | 186.12           | 4  |
| 13 | 1254.72 | 627.87          | G    | 275.17  | 138.09          | 258.14  | 129.58           | 3  |
| 14 | 1325.76 | 663.38          | A    | 218.15  | 109.58          | 201.12  | 101.07           | 2  |
| 15 |         |                 | K    | 147.11  | 74.06           | 130.09  | 65.55            | 1  |

MS/MS Fragmentation of ID997 **VGDGVAFLK**

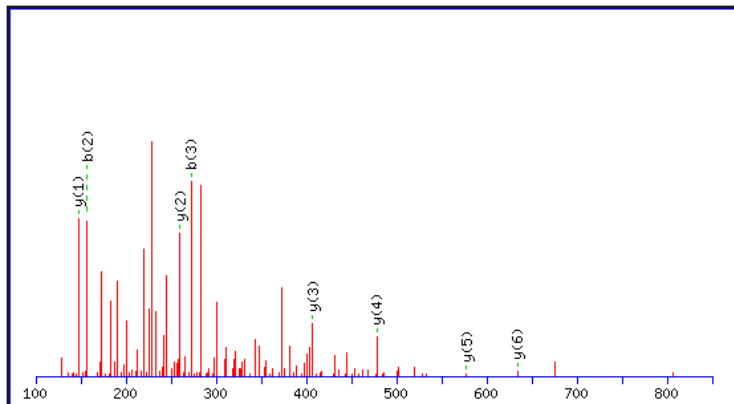

| # | <b>b</b>      | <b>b<sup>++</sup></b> | <b>b<sup>0</sup></b> | <b>b<sup>0++</sup></b> | <b>Seq.</b> | <b>y</b>      | <b>y<sup>++</sup></b> | <b>y<sup>*</sup></b> | <b>y<sup>+++</sup></b> | <b>y<sup>0</sup></b> | <b>y<sup>0++</sup></b> | # |
|---|---------------|-----------------------|----------------------|------------------------|-------------|---------------|-----------------------|----------------------|------------------------|----------------------|------------------------|---|
| 1 | 100.08        | 50.54                 |                      |                        | <b>V</b>    |               |                       |                      |                        |                      |                        | 9 |
| 2 | <b>157.10</b> | 79.05                 |                      |                        | <b>G</b>    | 806.44        | 403.72                | 789.41               | 395.21                 | 788.43               | 394.72                 | 8 |
| 3 | <b>272.12</b> | 136.57                | 254.11               | 127.56                 | <b>D</b>    | 749.42        | 375.21                | 732.39               | 366.70                 | 731.41               | 366.21                 | 7 |
| 4 | 329.15        | 165.08                | 311.13               | 156.07                 | <b>G</b>    | <b>634.39</b> | 317.70                | 617.37               | 309.19                 |                      |                        | 6 |
| 5 | 428.21        | 214.61                | 410.20               | 205.61                 | <b>V</b>    | <b>577.37</b> | 289.19                | 560.34               | 280.68                 |                      |                        | 5 |
| 6 | 499.25        | 250.13                | 481.24               | 241.12                 | <b>A</b>    | <b>478.30</b> | 239.65                | 461.28               | 231.14                 |                      |                        | 4 |
| 7 | 646.32        | 323.66                | 628.31               | 314.66                 | <b>F</b>    | <b>407.27</b> | 204.14                | 390.24               | 195.62                 |                      |                        | 3 |
| 8 | 759.40        | 380.21                | 741.39               | 371.20                 | <b>L</b>    | <b>260.20</b> | 130.60                | 243.17               | 122.09                 |                      |                        | 2 |
| 9 |               |                       |                      |                        | <b>K</b>    | <b>147.11</b> | 74.06                 | 130.09               | 65.55                  |                      |                        | 1 |

MS/MS Fragmentation of ID998 **YGADEGIPELR**

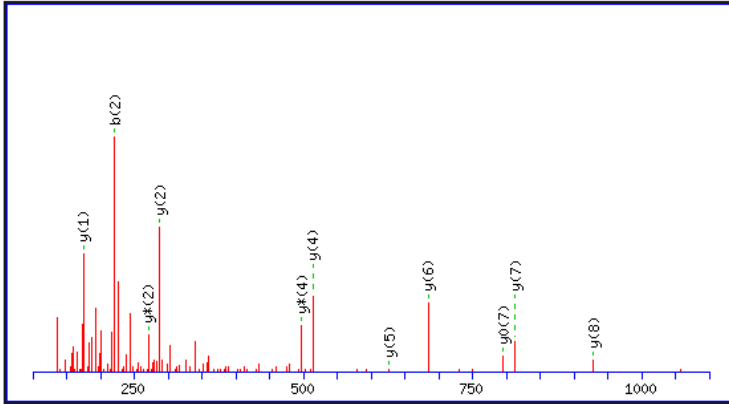

| #         | <b>b</b>      | <b>b<sup>++</sup></b> | <b>b<sup>0</sup></b> | <b>b<sup>0++</sup></b> | Seq.     | <b>y</b>      | <b>y<sup>++</sup></b> | <b>y*</b>     | <b>y<sup>*++</sup></b> | <b>y<sup>0</sup></b> | <b>y<sup>0++</sup></b> | #         |
|-----------|---------------|-----------------------|----------------------|------------------------|----------|---------------|-----------------------|---------------|------------------------|----------------------|------------------------|-----------|
| <b>1</b>  | 164.07        | 82.54                 |                      |                        | <b>Y</b> |               |                       |               |                        |                      |                        | <b>11</b> |
| <b>2</b>  | <b>221.09</b> | 111.05                |                      |                        | <b>G</b> | 1056.53       | 528.77                | 1039.51       | 520.26                 | 1038.52              | 519.76                 | <b>10</b> |
| <b>3</b>  | 292.13        | 146.57                |                      |                        | <b>A</b> | 999.51        | 500.26                | 982.48        | 491.75                 | 981.50               | 491.25                 | <b>9</b>  |
| <b>4</b>  | 407.16        | 204.08                | 389.15               | 195.08                 | <b>D</b> | <b>928.47</b> | 464.74                | 911.45        | 456.23                 | 910.46               | 455.74                 | <b>8</b>  |
| <b>5</b>  | 536.20        | 268.60                | 518.19               | 259.60                 | <b>E</b> | <b>813.45</b> | 407.23                | 796.42        | 398.71                 | <b>795.44</b>        | 398.22                 | <b>7</b>  |
| <b>6</b>  | 593.22        | 297.11                | 575.21               | 288.11                 | <b>G</b> | <b>684.40</b> | 342.71                | 667.38        | 334.19                 | 666.39               | 333.70                 | <b>6</b>  |
| <b>7</b>  | 706.30        | 353.66                | 688.29               | 344.65                 | <b>I</b> | <b>627.38</b> | 314.19                | 610.36        | 305.68                 | 609.37               | 305.19                 | <b>5</b>  |
| <b>8</b>  | 803.36        | 402.18                | 785.35               | 393.18                 | <b>P</b> | <b>514.30</b> | 257.65                | <b>497.27</b> | 249.14                 | 496.29               | 248.65                 | <b>4</b>  |
| <b>9</b>  | 932.40        | 466.70                | 914.39               | 457.70                 | <b>E</b> | 417.25        | 209.13                | 400.22        | 200.61                 | 399.24               | 200.12                 | <b>3</b>  |
| <b>10</b> | 1045.48       | 523.25                | 1027.47              | 514.24                 | <b>L</b> | <b>288.20</b> | 144.61                | <b>271.18</b> | 136.09                 |                      |                        | <b>2</b>  |
| <b>11</b> |               |                       |                      |                        | <b>R</b> | <b>175.12</b> | 88.06                 | 158.09        | 79.55                  |                      |                        | <b>1</b>  |

MS/MS Fragmentation of ID999 **GLPILGVFR**

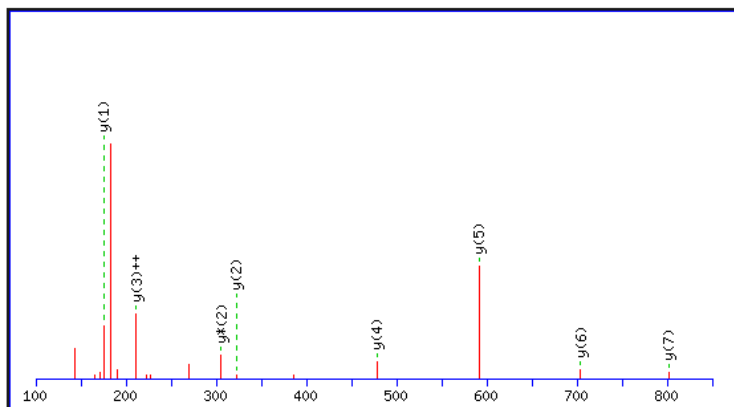

| #        | <b>b</b> | <b>b<sup>++</sup></b> | <b>Seq.</b> | <b>y</b>      | <b>y<sup>++</sup></b> | <b>y<sup>*</sup></b> | <b>y<sup>*++</sup></b> | #        |
|----------|----------|-----------------------|-------------|---------------|-----------------------|----------------------|------------------------|----------|
| <b>1</b> | 58.03    | 29.52                 | <b>G</b>    |               |                       |                      |                        | <b>9</b> |
| <b>2</b> | 171.11   | 86.06                 | <b>L</b>    | 914.58        | 457.79                | 897.56               | 449.28                 | <b>8</b> |
| <b>3</b> | 268.17   | 134.59                | <b>P</b>    | <b>801.50</b> | 401.25                | 784.47               | 392.74                 | <b>7</b> |
| <b>4</b> | 381.25   | 191.13                | <b>I</b>    | <b>704.45</b> | 352.73                | 687.42               | 344.21                 | <b>6</b> |
| <b>5</b> | 494.33   | 247.67                | <b>L</b>    | <b>591.36</b> | 296.18                | 574.33               | 287.67                 | <b>5</b> |
| <b>6</b> | 551.36   | 276.18                | <b>G</b>    | <b>478.28</b> | 239.64                | 461.25               | 231.13                 | <b>4</b> |
| <b>7</b> | 650.42   | 325.72                | <b>V</b>    | 421.26        | <b>211.13</b>         | 404.23               | 202.62                 | <b>3</b> |
| <b>8</b> | 797.49   | 399.25                | <b>F</b>    | <b>322.19</b> | 161.60                | <b>305.16</b>        | 153.08                 | <b>2</b> |
| <b>9</b> |          |                       | <b>R</b>    | <b>175.12</b> | 88.06                 | 158.09               | 79.55                  | <b>1</b> |

MS/MS Fragmentation of ID1000 **VADPAFLGYFIDK**

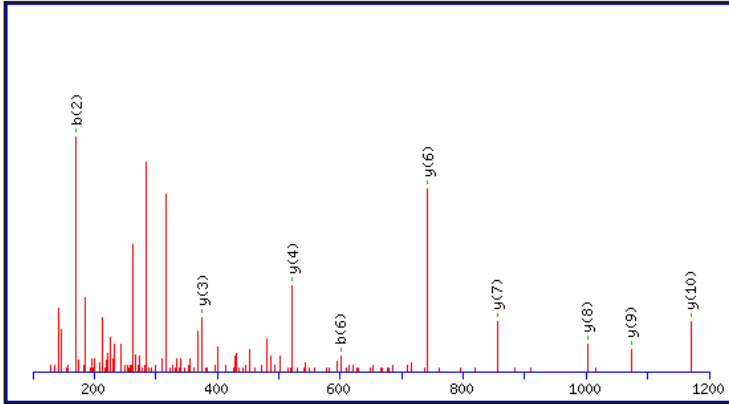

| #  | b       | b <sup>++</sup> | b <sup>0</sup> | b <sup>0++</sup> | Seq. | y       | y <sup>++</sup> | y*      | y <sup>*++</sup> | y <sup>0</sup> | y <sup>0++</sup> | #  |
|----|---------|-----------------|----------------|------------------|------|---------|-----------------|---------|------------------|----------------|------------------|----|
| 1  | 100.08  | 50.54           |                |                  | V    |         |                 |         |                  |                |                  | 13 |
| 2  | 171.11  | 86.06           |                |                  | A    | 1356.68 | 678.85          | 1339.66 | 670.33           | 1338.67        | 669.84           | 12 |
| 3  | 286.14  | 143.57          | 268.13         | 134.57           | D    | 1285.65 | 643.33          | 1268.62 | 634.81           | 1267.64        | 634.32           | 11 |
| 4  | 383.19  | 192.10          | 365.18         | 183.09           | P    | 1170.62 | 585.81          | 1153.59 | 577.30           | 1152.61        | 576.81           | 10 |
| 5  | 454.23  | 227.62          | 436.22         | 218.61           | A    | 1073.57 | 537.29          | 1056.54 | 528.77           | 1055.56        | 528.28           | 9  |
| 6  | 601.30  | 301.15          | 583.29         | 292.15           | F    | 1002.53 | 501.77          | 985.50  | 493.26           | 984.52         | 492.76           | 8  |
| 7  | 714.38  | 357.69          | 696.37         | 348.69           | L    | 855.46  | 428.23          | 838.43  | 419.72           | 837.45         | 419.23           | 7  |
| 8  | 771.40  | 386.21          | 753.39         | 377.20           | G    | 742.38  | 371.69          | 725.35  | 363.18           | 724.37         | 362.69           | 6  |
| 9  | 934.47  | 467.74          | 916.46         | 458.73           | Y    | 685.36  | 343.18          | 668.33  | 334.67           | 667.34         | 334.18           | 5  |
| 10 | 1081.54 | 541.27          | 1063.52        | 532.27           | F    | 522.29  | 261.65          | 505.27  | 253.14           | 504.28         | 252.64           | 4  |
| 11 | 1194.62 | 597.81          | 1176.61        | 588.81           | I    | 375.22  | 188.12          | 358.20  | 179.60           | 357.21         | 179.11           | 3  |
| 12 | 1309.65 | 655.33          | 1291.64        | 646.32           | D    | 262.14  | 131.57          | 245.11  | 123.06           | 244.13         | 122.57           | 2  |
| 13 |         |                 |                |                  | K    | 147.11  | 74.06           | 130.09  | 65.55            |                |                  | 1  |



MS/MS Fragmentation of ID1001 **VTDAVVLIDR**

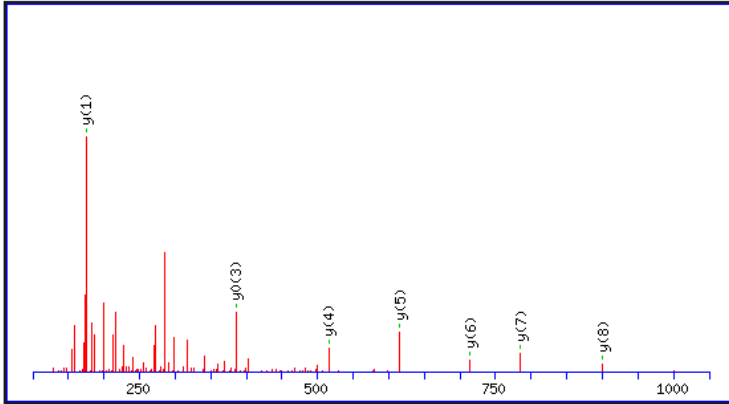

| #         | <b>b</b> | <b>b<sup>++</sup></b> | <b>b<sup>0</sup></b> | <b>b<sup>0++</sup></b> | <b>Seq.</b> | <b>y</b>      | <b>y<sup>++</sup></b> | <b>y*</b> | <b>y<sup>*++</sup></b> | <b>y<sup>0</sup></b> | <b>y<sup>0++</sup></b> | #         |
|-----------|----------|-----------------------|----------------------|------------------------|-------------|---------------|-----------------------|-----------|------------------------|----------------------|------------------------|-----------|
| <b>1</b>  | 100.08   | 50.54                 |                      |                        | <b>V</b>    |               |                       |           |                        |                      |                        | <b>10</b> |
| <b>2</b>  | 201.12   | 101.07                | 183.11               | 92.06                  | <b>T</b>    | 1001.56       | 501.28                | 984.54    | 492.77                 | 983.55               | 492.28                 | <b>9</b>  |
| <b>3</b>  | 316.15   | 158.58                | 298.14               | 149.57                 | <b>D</b>    | <b>900.51</b> | 450.76                | 883.49    | 442.25                 | 882.50               | 441.76                 | <b>8</b>  |
| <b>4</b>  | 387.19   | 194.10                | 369.18               | 185.09                 | <b>A</b>    | <b>785.49</b> | 393.25                | 768.46    | 384.73                 | 767.48               | 384.24                 | <b>7</b>  |
| <b>5</b>  | 486.26   | 243.63                | 468.25               | 234.63                 | <b>V</b>    | <b>714.45</b> | 357.73                | 697.42    | 349.22                 | 696.44               | 348.72                 | <b>6</b>  |
| <b>6</b>  | 585.32   | 293.17                | 567.31               | 284.16                 | <b>V</b>    | <b>615.38</b> | 308.19                | 598.36    | 299.68                 | 597.37               | 299.19                 | <b>5</b>  |
| <b>7</b>  | 698.41   | 349.71                | 680.40               | 340.70                 | <b>L</b>    | <b>516.31</b> | 258.66                | 499.29    | 250.15                 | 498.30               | 249.66                 | <b>4</b>  |
| <b>8</b>  | 811.49   | 406.25                | 793.48               | 397.24                 | <b>I</b>    | 403.23        | 202.12                | 386.20    | 193.61                 | <b>385.22</b>        | 193.11                 | <b>3</b>  |
| <b>9</b>  | 926.52   | 463.76                | 908.51               | 454.76                 | <b>D</b>    | 290.15        | 145.58                | 273.12    | 137.06                 | 272.14               | 136.57                 | <b>2</b>  |
| <b>10</b> |          |                       |                      |                        | <b>R</b>    | <b>175.12</b> | 88.06                 | 158.09    | 79.55                  |                      |                        | <b>1</b>  |

MS/MS Fragmentation of ID1004 **DALQFVADLQR**

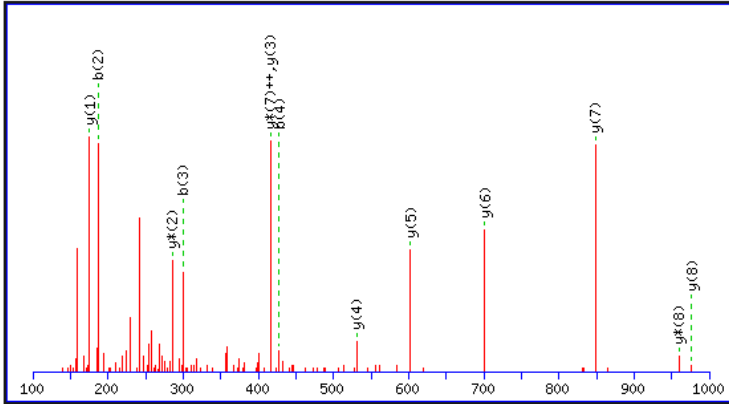

| #         | <b>b</b>      | <b>b<sup>++</sup></b> | <b>b*</b> | <b>b<sup>*++</sup></b> | <b>b<sup>0</sup></b> | <b>b<sup>0++</sup></b> | Seq.     | <b>y</b>      | <b>y<sup>++</sup></b> | <b>y*</b>     | <b>y<sup>*++</sup></b> | <b>y<sup>0</sup></b> | <b>y<sup>0++</sup></b> | #         |
|-----------|---------------|-----------------------|-----------|------------------------|----------------------|------------------------|----------|---------------|-----------------------|---------------|------------------------|----------------------|------------------------|-----------|
| <b>1</b>  | 116.03        | 58.52                 |           |                        | 98.02                | 49.52                  | <b>D</b> |               |                       |               |                        |                      |                        | <b>11</b> |
| <b>2</b>  | <b>187.07</b> | 94.04                 |           |                        | 169.06               | 85.03                  | <b>A</b> | 1160.64       | 580.82                | 1143.62       | 572.31                 | 1142.63              | 571.82                 | <b>10</b> |
| <b>3</b>  | <b>300.16</b> | 150.58                |           |                        | 282.14               | 141.58                 | <b>L</b> | 1089.61       | 545.31                | 1072.58       | 536.79                 | 1071.59              | 536.30                 | <b>9</b>  |
| <b>4</b>  | <b>428.21</b> | 214.61                | 411.19    | 206.10                 | 410.20               | 205.61                 | <b>Q</b> | <b>976.52</b> | 488.76                | <b>959.49</b> | 480.25                 | 958.51               | 479.76                 | <b>8</b>  |
| <b>5</b>  | 575.28        | 288.14                | 558.26    | 279.63                 | 557.27               | 279.14                 | <b>F</b> | <b>848.46</b> | 424.73                | 831.44        | <b>416.22</b>          | 830.45               | 415.73                 | <b>7</b>  |
| <b>6</b>  | 674.35        | 337.68                | 657.32    | 329.17                 | 656.34               | 328.67                 | <b>V</b> | <b>701.39</b> | 351.20                | 684.37        | 342.69                 | 683.38               | 342.20                 | <b>6</b>  |
| <b>7</b>  | 745.39        | 373.20                | 728.36    | 364.68                 | 727.38               | 364.19                 | <b>A</b> | <b>602.33</b> | 301.67                | 585.30        | 293.15                 | 584.32               | 292.66                 | <b>5</b>  |
| <b>8</b>  | 860.41        | 430.71                | 843.39    | 422.20                 | 842.40               | 421.71                 | <b>D</b> | <b>531.29</b> | 266.15                | 514.26        | 257.63                 | 513.28               | 257.14                 | <b>4</b>  |
| <b>9</b>  | 973.50        | 487.25                | 956.47    | 478.74                 | 955.49               | 478.25                 | <b>L</b> | <b>416.26</b> | 208.63                | 399.24        | 200.12                 |                      |                        | <b>3</b>  |
| <b>10</b> | 1101.56       | 551.28                | 1084.53   | 542.77                 | 1083.55              | 542.28                 | <b>Q</b> | 303.18        | 152.09                | <b>286.15</b> | 143.58                 |                      |                        | <b>2</b>  |
| <b>11</b> |               |                       |           |                        |                      |                        | <b>R</b> | <b>175.12</b> | 88.06                 | 158.09        | 79.55                  |                      |                        | <b>1</b>  |

MS/MS Fragmentation of ID1005 **INLGVGAYR**

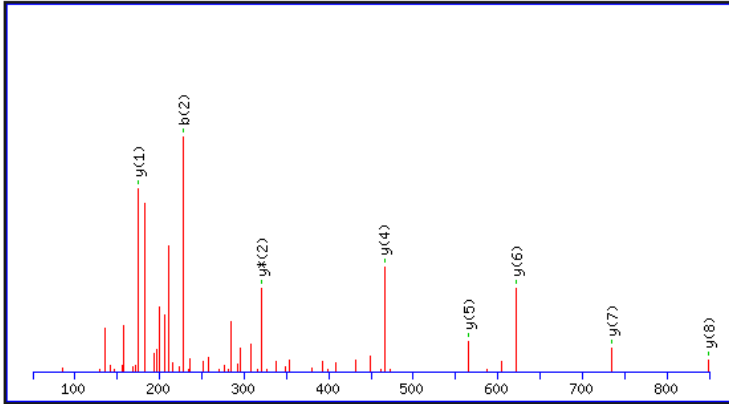

| #        | <b>b</b>      | <b>b<sup>++</sup></b> | <b>b<sup>*</sup></b> | <b>b<sup>*++</sup></b> | Seq.     | <b>y</b>      | <b>y<sup>++</sup></b> | <b>y<sup>*</sup></b> | <b>y<sup>*++</sup></b> | #        |
|----------|---------------|-----------------------|----------------------|------------------------|----------|---------------|-----------------------|----------------------|------------------------|----------|
| <b>1</b> | 114.09        | 57.55                 |                      |                        | <b>I</b> |               |                       |                      |                        | <b>9</b> |
| <b>2</b> | <b>228.13</b> | 114.57                | 211.11               | 106.06                 | <b>N</b> | <b>849.46</b> | 425.23                | 832.43               | 416.72                 | <b>8</b> |
| <b>3</b> | 341.22        | 171.11                | 324.19               | 162.60                 | <b>L</b> | <b>735.41</b> | 368.21                | 718.39               | 359.70                 | <b>7</b> |
| <b>4</b> | 398.24        | 199.62                | 381.21               | 191.11                 | <b>G</b> | <b>622.33</b> | 311.67                | 605.30               | 303.16                 | <b>6</b> |
| <b>5</b> | 497.31        | 249.16                | 480.28               | 240.64                 | <b>V</b> | <b>565.31</b> | 283.16                | 548.28               | 274.64                 | <b>5</b> |
| <b>6</b> | 554.33        | 277.67                | 537.30               | 269.16                 | <b>G</b> | <b>466.24</b> | 233.62                | 449.21               | 225.11                 | <b>4</b> |
| <b>7</b> | 625.37        | 313.19                | 608.34               | 304.67                 | <b>A</b> | 409.22        | 205.11                | 392.19               | 196.60                 | <b>3</b> |
| <b>8</b> | 788.43        | 394.72                | 771.40               | 386.21                 | <b>Y</b> | 338.18        | 169.59                | <b>321.16</b>        | 161.08                 | <b>2</b> |
| <b>9</b> |               |                       |                      |                        | <b>R</b> | <b>175.12</b> | 88.06                 | 158.09               | 79.55                  | <b>1</b> |

MS/MS Fragmentation of ID1006 **ASGPATILAIGK**

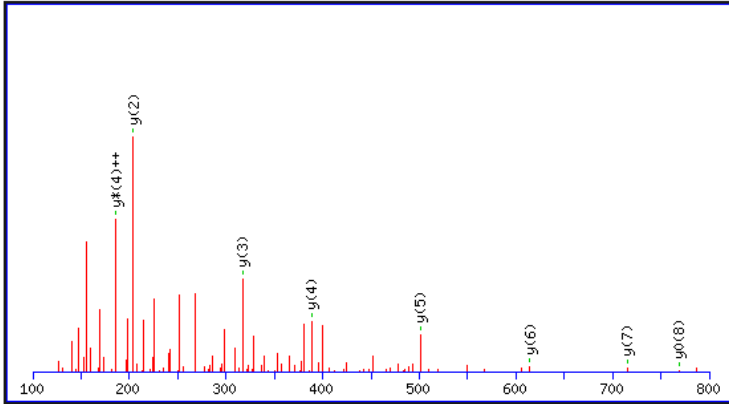

| #         | <b>b</b> | <b>b<sup>++</sup></b> | <b>b<sup>0</sup></b> | <b>b<sup>0++</sup></b> | Seq.     | <b>y</b>      | <b>y<sup>++</sup></b> | <b>y<sup>*</sup></b> | <b>y<sup>*++</sup></b> | <b>y<sup>0</sup></b> | <b>y<sup>0++</sup></b> | #         |
|-----------|----------|-----------------------|----------------------|------------------------|----------|---------------|-----------------------|----------------------|------------------------|----------------------|------------------------|-----------|
| <b>1</b>  | 72.04    | 36.53                 |                      |                        | <b>A</b> |               |                       |                      |                        |                      |                        | <b>12</b> |
| <b>2</b>  | 159.08   | 80.04                 | 141.07               | 71.04                  | <b>S</b> | 1027.61       | 514.31                | 1010.59              | 505.80                 | 1009.60              | 505.31                 | <b>11</b> |
| <b>3</b>  | 216.10   | 108.55                | 198.09               | 99.55                  | <b>G</b> | 940.58        | 470.79                | 923.56               | 462.28                 | 922.57               | 461.79                 | <b>10</b> |
| <b>4</b>  | 313.15   | 157.08                | 295.14               | 148.07                 | <b>P</b> | 883.56        | 442.28                | 866.53               | 433.77                 | 865.55               | 433.28                 | <b>9</b>  |
| <b>5</b>  | 384.19   | 192.60                | 366.18               | 183.59                 | <b>A</b> | 786.51        | 393.76                | 769.48               | 385.24                 | <b>768.50</b>        | 384.75                 | <b>8</b>  |
| <b>6</b>  | 485.24   | 243.12                | 467.22               | 234.12                 | <b>T</b> | <b>715.47</b> | 358.24                | 698.44               | 349.73                 | 697.46               | 349.23                 | <b>7</b>  |
| <b>7</b>  | 598.32   | 299.66                | 580.31               | 290.66                 | <b>I</b> | <b>614.42</b> | 307.72                | 597.40               | 299.20                 |                      |                        | <b>6</b>  |
| <b>8</b>  | 711.40   | 356.21                | 693.39               | 347.20                 | <b>L</b> | <b>501.34</b> | 251.17                | 484.31               | 242.66                 |                      |                        | <b>5</b>  |
| <b>9</b>  | 782.44   | 391.72                | 764.43               | 382.72                 | <b>A</b> | <b>388.26</b> | 194.63                | 371.23               | <b>186.12</b>          |                      |                        | <b>4</b>  |
| <b>10</b> | 895.52   | 448.27                | 877.51               | 439.26                 | <b>I</b> | <b>317.22</b> | 159.11                | 300.19               | 150.60                 |                      |                        | <b>3</b>  |
| <b>11</b> | 952.55   | 476.78                | 934.54               | 467.77                 | <b>G</b> | <b>204.13</b> | 102.57                | 187.11               | 94.06                  |                      |                        | <b>2</b>  |
| <b>12</b> |          |                       |                      |                        | <b>K</b> | 147.11        | 74.06                 | 130.09               | 65.55                  |                      |                        | <b>1</b>  |

MS/MS Fragmentation of ID1015 **VVLTIQNWSSK**

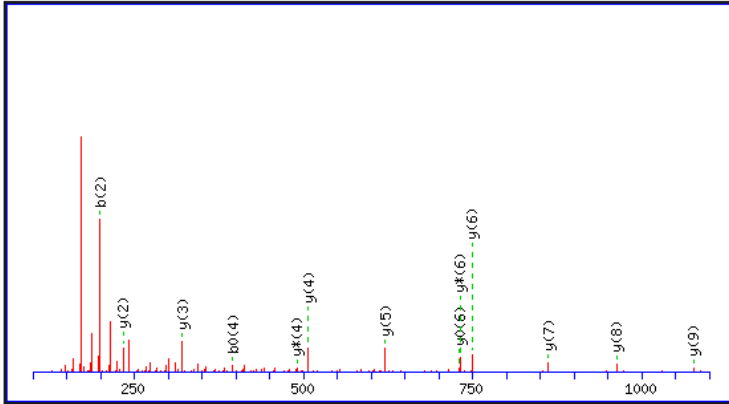

| #  | b             | b <sup>++</sup> | b*      | b <sup>*++</sup> | b <sup>0</sup> | b <sup>0++</sup> | Seq. | y              | y <sup>++</sup> | y*            | y <sup>*++</sup> | y <sup>0</sup> | y <sup>0++</sup> | #  |
|----|---------------|-----------------|---------|------------------|----------------|------------------|------|----------------|-----------------|---------------|------------------|----------------|------------------|----|
| 1  | 100.08        | 50.54           |         |                  |                |                  | V    |                |                 |               |                  |                |                  | 11 |
| 2  | <b>199.14</b> | 100.08          |         |                  |                |                  | V    | 1175.64        | 588.32          | 1158.62       | 579.81           | 1157.63        | 579.32           | 10 |
| 3  | 312.23        | 156.62          |         |                  |                |                  | L    | <b>1076.57</b> | 538.79          | 1059.55       | 530.28           | 1058.56        | 529.79           | 9  |
| 4  | 413.28        | 207.14          |         |                  | <b>395.27</b>  | 198.14           | T    | <b>963.49</b>  | 482.25          | 946.46        | 473.74           | 945.48         | 473.24           | 8  |
| 5  | 526.36        | 263.68          |         |                  | 508.35         | 254.68           | I    | <b>862.44</b>  | 431.72          | 845.42        | 423.21           | 844.43         | 422.72           | 7  |
| 6  | 654.42        | 327.71          | 637.39  | 319.20           | 636.41         | 318.71           | Q    | <b>749.36</b>  | 375.18          | <b>732.33</b> | 366.67           | <b>731.35</b>  | 366.18           | 6  |
| 7  | 768.46        | 384.73          | 751.43  | 376.22           | 750.45         | 375.73           | N    | <b>621.30</b>  | 311.15          | 604.27        | 302.64           | 603.29         | 302.15           | 5  |
| 8  | 954.54        | 477.77          | 937.51  | 469.26           | 936.53         | 468.77           | W    | <b>507.26</b>  | 254.13          | <b>490.23</b> | 245.62           | 489.25         | 245.13           | 4  |
| 9  | 1041.57       | 521.29          | 1024.55 | 512.78           | 1023.56        | 512.28           | S    | <b>321.18</b>  | 161.09          | 304.15        | 152.58           | 303.17         | 152.09           | 3  |
| 10 | 1128.60       | 564.81          | 1111.58 | 556.29           | 1110.59        | 555.80           | S    | <b>234.14</b>  | 117.58          | 217.12        | 109.06           | 216.13         | 108.57           | 2  |
| 11 |               |                 |         |                  |                |                  | K    | 147.11         | 74.06           | 130.09        | 65.55            |                |                  | 1  |

MS/MS Fragmentation of ID1018 **LLSLADLDSSFYK**

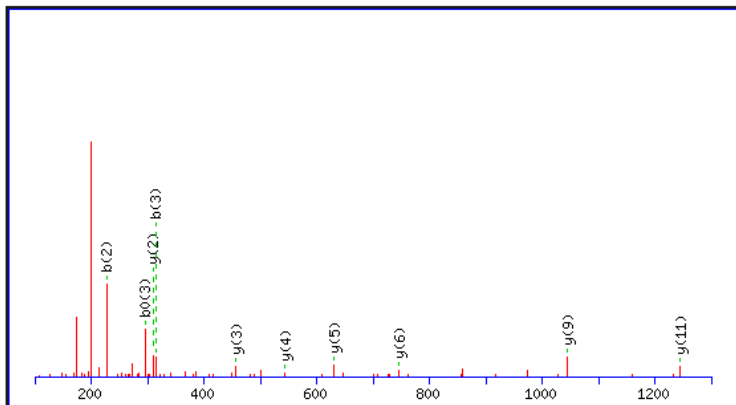

| #         | <b>b</b>      | <b>b<sup>++</sup></b> | <b>b<sup>0</sup></b> | <b>b<sup>0++</sup></b> | Seq.     | <b>y</b>       | <b>y<sup>++</sup></b> | <b>y<sup>*</sup></b> | <b>y<sup>*++</sup></b> | <b>y<sup>0</sup></b> | <b>y<sup>0++</sup></b> | #         |
|-----------|---------------|-----------------------|----------------------|------------------------|----------|----------------|-----------------------|----------------------|------------------------|----------------------|------------------------|-----------|
| <b>1</b>  | 114.09        | 57.55                 |                      |                        | <b>L</b> |                |                       |                      |                        |                      |                        | <b>13</b> |
| <b>2</b>  | <b>227.18</b> | 114.09                |                      |                        | <b>L</b> | 1358.68        | 679.85                | 1341.66              | 671.33                 | 1340.67              | 670.84                 | <b>12</b> |
| <b>3</b>  | <b>314.21</b> | 157.61                | <b>296.20</b>        | 148.60                 | <b>S</b> | <b>1245.60</b> | 623.30                | 1228.57              | 614.79                 | 1227.59              | 614.30                 | <b>11</b> |
| <b>4</b>  | 427.29        | 214.15                | 409.28               | 205.14                 | <b>L</b> | 1158.57        | 579.79                | 1141.54              | 571.27                 | 1140.56              | 570.78                 | <b>10</b> |
| <b>5</b>  | 498.33        | 249.67                | 480.32               | 240.66                 | <b>A</b> | <b>1045.48</b> | 523.25                | 1028.46              | 514.73                 | 1027.47              | 514.24                 | <b>9</b>  |
| <b>6</b>  | 613.36        | 307.18                | 595.34               | 298.18                 | <b>D</b> | 974.45         | 487.73                | 957.42               | 479.21                 | 956.44               | 478.72                 | <b>8</b>  |
| <b>7</b>  | 726.44        | 363.72                | 708.43               | 354.72                 | <b>L</b> | 859.42         | 430.21                | 842.39               | 421.70                 | 841.41               | 421.21                 | <b>7</b>  |
| <b>8</b>  | 841.47        | 421.24                | 823.46               | 412.23                 | <b>D</b> | <b>746.34</b>  | 373.67                | 729.31               | 365.16                 | 728.32               | 364.67                 | <b>6</b>  |
| <b>9</b>  | 928.50        | 464.75                | 910.49               | 455.75                 | <b>S</b> | <b>631.31</b>  | 316.16                | 614.28               | 307.64                 | 613.30               | 307.15                 | <b>5</b>  |
| <b>10</b> | 1015.53       | 508.27                | 997.52               | 499.26                 | <b>S</b> | <b>544.28</b>  | 272.64                | 527.25               | 264.13                 | 526.27               | 263.64                 | <b>4</b>  |
| <b>11</b> | 1162.60       | 581.80                | 1144.59              | 572.80                 | <b>F</b> | <b>457.24</b>  | 229.13                | 440.22               | 220.61                 |                      |                        | <b>3</b>  |
| <b>12</b> | 1325.66       | 663.33                | 1307.65              | 654.33                 | <b>Y</b> | <b>310.18</b>  | 155.59                | 293.15               | 147.08                 |                      |                        | <b>2</b>  |
| <b>13</b> |               |                       |                      |                        | <b>K</b> | 147.11         | 74.06                 | 130.09               | 65.55                  |                      |                        | <b>1</b>  |

MS/MS Fragmentation of ID1030 **NATLLYEEAASLFR**

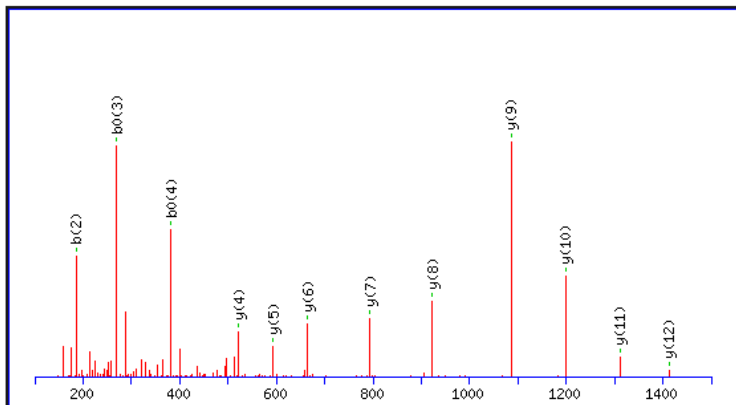

| #  | b             | b <sup>++</sup> | b*      | b <sup>*++</sup> | b <sup>0</sup> | b <sup>0++</sup> | Seq. | y              | y <sup>++</sup> | y*      | y <sup>*++</sup> | y <sup>0</sup> | y <sup>0++</sup> | #  |
|----|---------------|-----------------|---------|------------------|----------------|------------------|------|----------------|-----------------|---------|------------------|----------------|------------------|----|
| 1  | 115.05        | 58.03           | 98.02   | 49.52            |                |                  | N    |                |                 |         |                  |                |                  | 14 |
| 2  | <b>186.09</b> | 93.55           | 169.06  | 85.03            |                |                  | A    | 1483.78        | 742.39          | 1466.75 | 733.88           | 1465.77        | 733.39           | 13 |
| 3  | 287.13        | 144.07          | 270.11  | 135.56           | <b>269.12</b>  | 135.07           | T    | <b>1412.74</b> | 706.87          | 1395.72 | 698.36           | 1394.73        | 697.87           | 12 |
| 4  | 400.22        | 200.61          | 383.19  | 192.10           | <b>382.21</b>  | 191.61           | L    | <b>1311.69</b> | 656.35          | 1294.67 | 647.84           | 1293.68        | 647.35           | 11 |
| 5  | 513.30        | 257.16          | 496.28  | 248.64           | 495.29         | 248.15           | L    | <b>1198.61</b> | 599.81          | 1181.58 | 591.30           | 1180.60        | 590.80           | 10 |
| 6  | 676.37        | 338.69          | 659.34  | 330.17           | 658.36         | 329.68           | Y    | <b>1085.53</b> | 543.27          | 1068.50 | 534.75           | 1067.52        | 534.26           | 9  |
| 7  | 805.41        | 403.21          | 788.38  | 394.69           | 787.40         | 394.20           | E    | <b>922.46</b>  | 461.74          | 905.44  | 453.22           | 904.45         | 452.73           | 8  |
| 8  | 934.45        | 467.73          | 917.43  | 459.22           | 916.44         | 458.72           | E    | <b>793.42</b>  | 397.21          | 776.39  | 388.70           | 775.41         | 388.21           | 7  |
| 9  | 1005.49       | 503.25          | 988.46  | 494.73           | 987.48         | 494.24           | A    | <b>664.38</b>  | 332.69          | 647.35  | 324.18           | 646.37         | 323.69           | 6  |
| 10 | 1076.53       | 538.77          | 1059.50 | 530.25           | 1058.52        | 529.76           | A    | <b>593.34</b>  | 297.17          | 576.31  | 288.66           | 575.33         | 288.17           | 5  |
| 11 | 1163.56       | 582.28          | 1146.53 | 573.77           | 1145.55        | 573.28           | S    | <b>522.30</b>  | 261.66          | 505.28  | 253.14           | 504.29         | 252.65           | 4  |
| 12 | 1276.64       | 638.82          | 1259.62 | 630.31           | 1258.63        | 629.82           | L    | 435.27         | 218.14          | 418.24  | 209.63           |                |                  | 3  |
| 13 | 1423.71       | 712.36          | 1406.68 | 703.85           | 1405.70        | 703.35           | F    | 322.19         | 161.60          | 305.16  | 153.08           |                |                  | 2  |
| 14 |               |                 |         |                  |                |                  | R    | 175.12         | 88.06           | 158.09  | 79.55            |                |                  | 1  |

MS/MS Fragmentation of ID1035 **NLDFGVLDLSR**

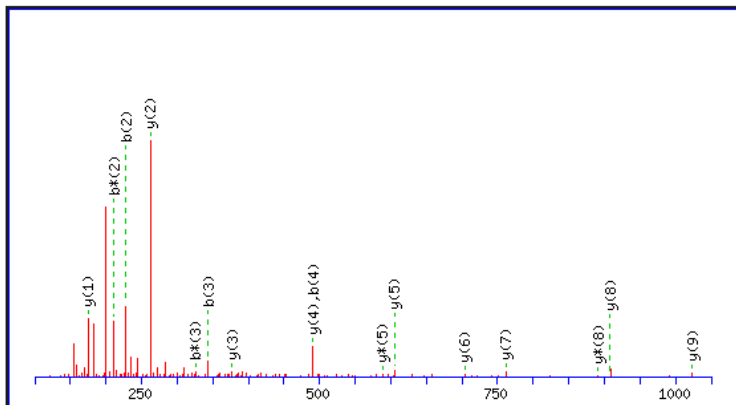

| #  | b             | b <sup>++</sup> | b*            | b <sup>*++</sup> | b <sup>0</sup> | b <sup>0++</sup> | Seq. | y              | y <sup>++</sup> | y*            | y <sup>*++</sup> | y <sup>0</sup> | y <sup>0++</sup> | #  |
|----|---------------|-----------------|---------------|------------------|----------------|------------------|------|----------------|-----------------|---------------|------------------|----------------|------------------|----|
| 1  | 115.05        | 58.03           | 98.02         | 49.52            |                |                  | N    |                |                 |               |                  |                |                  | 11 |
| 2  | <b>228.13</b> | 114.57          | <b>211.11</b> | 106.06           |                |                  | L    | 1136.56        | 568.78          | 1119.53       | 560.27           | 1118.55        | 559.78           | 10 |
| 3  | <b>343.16</b> | 172.08          | <b>326.13</b> | 163.57           | 325.15         | 163.08           | D    | <b>1023.47</b> | 512.24          | 1006.45       | 503.73           | 1005.46        | 503.24           | 9  |
| 4  | <b>490.23</b> | 245.62          | 473.20        | 237.11           | 472.22         | 236.61           | F    | <b>908.45</b>  | 454.73          | <b>891.42</b> | 446.21           | 890.44         | 445.72           | 8  |
| 5  | 547.25        | 274.13          | 530.22        | 265.62           | 529.24         | 265.12           | G    | <b>761.38</b>  | 381.19          | 744.35        | 372.68           | 743.37         | 372.19           | 7  |
| 6  | 646.32        | 323.66          | 629.29        | 315.15           | 628.31         | 314.66           | V    | <b>704.36</b>  | 352.68          | 687.33        | 344.17           | 686.35         | 343.68           | 6  |
| 7  | 761.35        | 381.18          | 744.32        | 372.66           | 743.34         | 372.17           | D    | <b>605.29</b>  | 303.15          | <b>588.26</b> | 294.63           | 587.28         | 294.14           | 5  |
| 8  | 874.43        | 437.72          | 857.40        | 429.21           | 856.42         | 428.71           | L    | <b>490.26</b>  | 245.63          | 473.24        | 237.12           | 472.25         | 236.63           | 4  |
| 9  | 989.46        | 495.23          | 972.43        | 486.72           | 971.45         | 486.23           | D    | <b>377.18</b>  | 189.09          | 360.15        | 180.58           | 359.17         | 180.09           | 3  |
| 10 | 1076.49       | 538.75          | 1059.46       | 530.24           | 1058.48        | 529.74           | S    | <b>262.15</b>  | 131.58          | 245.12        | 123.07           | 244.14         | 122.57           | 2  |
| 11 |               |                 |               |                  |                |                  | R    | <b>175.12</b>  | 88.06           | 158.09        | 79.55            |                |                  | 1  |



MS/MS Fragmentation of ID1036 **LNLINSTYK**

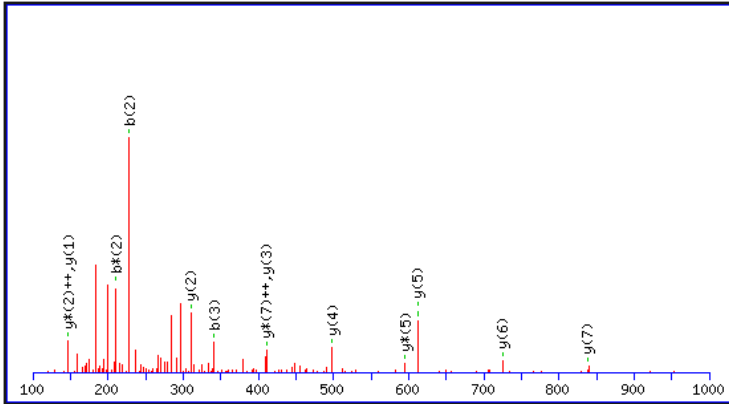

| #        | <b>b</b>      | <b>b<sup>++</sup></b> | <b>b<sup>*</sup></b> | <b>b<sup>*++</sup></b> | <b>b<sup>0</sup></b> | <b>b<sup>0++</sup></b> | Seq.     | <b>y</b>      | <b>y<sup>++</sup></b> | <b>y<sup>*</sup></b> | <b>y<sup>*++</sup></b> | <b>y<sup>0</sup></b> | <b>y<sup>0++</sup></b> | #        |
|----------|---------------|-----------------------|----------------------|------------------------|----------------------|------------------------|----------|---------------|-----------------------|----------------------|------------------------|----------------------|------------------------|----------|
| <b>1</b> | 114.09        | 57.55                 |                      |                        |                      |                        | <b>L</b> |               |                       |                      |                        |                      |                        | <b>9</b> |
| <b>2</b> | <b>228.13</b> | 114.57                | <b>211.11</b>        | 106.06                 |                      |                        | <b>N</b> | 952.51        | 476.76                | 935.48               | 468.25                 | 934.50               | 467.75                 | <b>8</b> |
| <b>3</b> | <b>341.22</b> | 171.11                | 324.19               | 162.60                 |                      |                        | <b>L</b> | <b>838.47</b> | 419.74                | 821.44               | <b>411.22</b>          | 820.46               | 410.73                 | <b>7</b> |
| <b>4</b> | 454.30        | 227.65                | 437.28               | 219.14                 |                      |                        | <b>I</b> | <b>725.38</b> | 363.20                | 708.36               | 354.68                 | 707.37               | 354.19                 | <b>6</b> |
| <b>5</b> | 568.35        | 284.68                | 551.32               | 276.16                 |                      |                        | <b>N</b> | <b>612.30</b> | 306.65                | <b>595.27</b>        | 298.14                 | 594.29               | 297.65                 | <b>5</b> |
| <b>6</b> | 655.38        | 328.19                | 638.35               | 319.68                 | 637.37               | 319.19                 | <b>S</b> | <b>498.26</b> | 249.63                | 481.23               | 241.12                 | 480.25               | 240.63                 | <b>4</b> |
| <b>7</b> | 756.43        | 378.72                | 739.40               | 370.20                 | 738.41               | 369.71                 | <b>T</b> | <b>411.22</b> | 206.12                | 394.20               | 197.60                 | 393.21               | 197.11                 | <b>3</b> |
| <b>8</b> | 919.49        | 460.25                | 902.46               | 451.73                 | 901.48               | 451.24                 | <b>Y</b> | <b>310.18</b> | 155.59                | 293.15               | <b>147.08</b>          |                      |                        | <b>2</b> |
| <b>9</b> |               |                       |                      |                        |                      |                        | <b>K</b> | <b>147.11</b> | 74.06                 | 130.09               | 65.55                  |                      |                        | <b>1</b> |

MS/MS Fragmentation of ID1037 **VDLLAPYR**

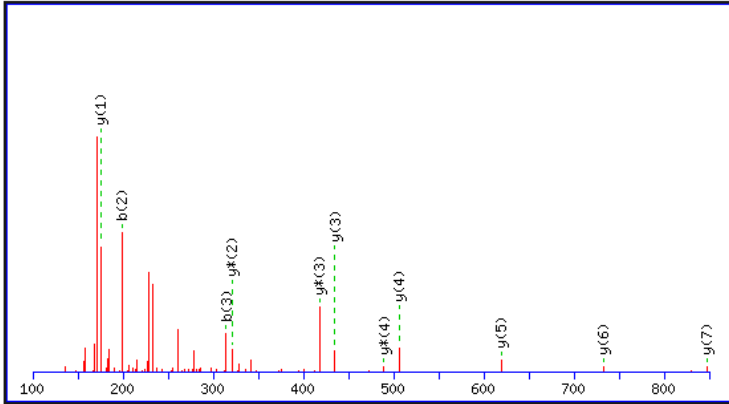

| # | <b>b</b>      | <b>b<sup>++</sup></b> | <b>b<sup>0</sup></b> | <b>b<sup>0++</sup></b> | Seq. | <b>y</b>      | <b>y<sup>++</sup></b> | <b>y*</b>     | <b>y<sup>+++</sup></b> | <b>y<sup>0</sup></b> | <b>y<sup>0++</sup></b> | # |
|---|---------------|-----------------------|----------------------|------------------------|------|---------------|-----------------------|---------------|------------------------|----------------------|------------------------|---|
| 1 | 100.08        | 50.54                 |                      |                        | V    |               |                       |               |                        |                      |                        | 9 |
| 2 | <b>199.14</b> | 100.08                |                      |                        | V    | 946.54        | 473.77                | 929.51        | 465.26                 | 928.53               | 464.77                 | 8 |
| 3 | <b>314.17</b> | 157.59                | 296.16               | 148.58                 | D    | <b>847.47</b> | 424.24                | 830.44        | 415.72                 | 829.46               | 415.23                 | 7 |
| 4 | 427.26        | 214.13                | 409.24               | 205.13                 | L    | <b>732.44</b> | 366.72                | 715.41        | 358.21                 |                      |                        | 6 |
| 5 | 540.34        | 270.67                | 522.33               | 261.67                 | L    | <b>619.36</b> | 310.18                | 602.33        | 301.67                 |                      |                        | 5 |
| 6 | 611.38        | 306.19                | 593.37               | 297.19                 | A    | <b>506.27</b> | 253.64                | <b>489.25</b> | 245.13                 |                      |                        | 4 |
| 7 | 708.43        | 354.72                | 690.42               | 345.71                 | P    | <b>435.24</b> | 218.12                | <b>418.21</b> | 209.61                 |                      |                        | 3 |
| 8 | 871.49        | 436.25                | 853.48               | 427.24                 | Y    | 338.18        | 169.59                | <b>321.16</b> | 161.08                 |                      |                        | 2 |
| 9 |               |                       |                      |                        | R    | <b>175.12</b> | 88.06                 | 158.09        | 79.55                  |                      |                        | 1 |

MS/MS Fragmentation of ID1041 **GGQFSVFIR**

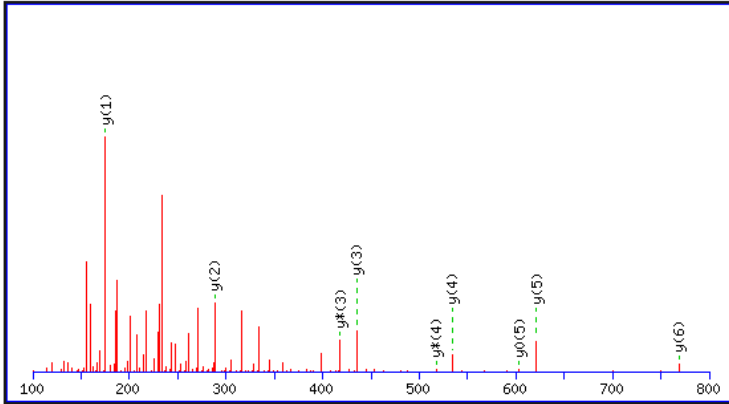

| #        | <b>b</b> | <b>b<sup>++</sup></b> | <b>b<sup>*</sup></b> | <b>b<sup>*++</sup></b> | <b>b<sup>0</sup></b> | <b>b<sup>0++</sup></b> | Seq.     | <b>y</b>      | <b>y<sup>++</sup></b> | <b>y<sup>*</sup></b> | <b>y<sup>*++</sup></b> | <b>y<sup>0</sup></b> | <b>y<sup>0++</sup></b> | #        |
|----------|----------|-----------------------|----------------------|------------------------|----------------------|------------------------|----------|---------------|-----------------------|----------------------|------------------------|----------------------|------------------------|----------|
| <b>1</b> | 58.03    | 29.52                 |                      |                        |                      |                        | <b>G</b> |               |                       |                      |                        |                      |                        | <b>9</b> |
| <b>2</b> | 115.05   | 58.03                 |                      |                        |                      |                        | <b>G</b> | 953.52        | 477.26                | 936.49               | 468.75                 | 935.51               | 468.26                 | <b>8</b> |
| <b>3</b> | 243.11   | 122.06                | 226.08               | 113.54                 |                      |                        | <b>Q</b> | 896.50        | 448.75                | 879.47               | 440.24                 | 878.49               | 439.75                 | <b>7</b> |
| <b>4</b> | 390.18   | 195.59                | 373.15               | 187.08                 |                      |                        | <b>F</b> | <b>768.44</b> | 384.72                | 751.41               | 376.21                 | 750.43               | 375.72                 | <b>6</b> |
| <b>5</b> | 477.21   | 239.11                | 460.18               | 230.59                 | 459.20               | 230.10                 | <b>S</b> | <b>621.37</b> | 311.19                | 604.35               | 302.68                 | <b>603.36</b>        | 302.18                 | <b>5</b> |
| <b>6</b> | 576.28   | 288.64                | 559.25               | 280.13                 | 558.27               | 279.64                 | <b>V</b> | <b>534.34</b> | 267.67                | <b>517.31</b>        | 259.16                 |                      |                        | <b>4</b> |
| <b>7</b> | 723.35   | 362.18                | 706.32               | 353.66                 | 705.34               | 353.17                 | <b>F</b> | <b>435.27</b> | 218.14                | <b>418.24</b>        | 209.63                 |                      |                        | <b>3</b> |
| <b>8</b> | 836.43   | 418.72                | 819.40               | 410.21                 | 818.42               | 409.71                 | <b>I</b> | <b>288.20</b> | 144.61                | 271.18               | 136.09                 |                      |                        | <b>2</b> |
| <b>9</b> |          |                       |                      |                        |                      |                        | <b>R</b> | <b>175.12</b> | 88.06                 | 158.09               | 79.55                  |                      |                        | <b>1</b> |

MS/MS Fragmentation of ID1042 **QDSPLAVYPVDK**

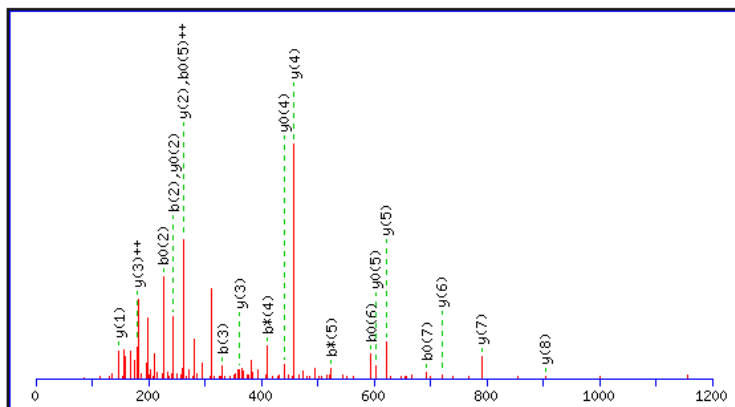

| #  | b             | b <sup>++</sup> | b*            | b <sup>*++</sup> | b <sup>0</sup> | b <sup>0++</sup> | Seq. | y             | y <sup>++</sup> | y*      | y <sup>*++</sup> | y <sup>0</sup> | y <sup>0++</sup> | #  |
|----|---------------|-----------------|---------------|------------------|----------------|------------------|------|---------------|-----------------|---------|------------------|----------------|------------------|----|
| 1  | 129.07        | 65.04           | 112.04        | 56.52            |                |                  | Q    |               |                 |         |                  |                |                  | 12 |
| 2  | <b>244.09</b> | 122.55          | 227.07        | 114.04           | <b>226.08</b>  | 113.54           | D    | 1203.63       | 602.32          | 1186.60 | 593.80           | 1185.61        | 593.31           | 11 |
| 3  | <b>331.12</b> | 166.07          | 314.10        | 157.55           | 313.11         | 157.06           | S    | 1088.60       | 544.80          | 1071.57 | 536.29           | 1070.59        | 535.80           | 10 |
| 4  | 428.18        | 214.59          | <b>411.15</b> | 206.08           | 410.17         | 205.59           | P    | 1001.57       | 501.29          | 984.54  | 492.77           | 983.56         | 492.28           | 9  |
| 5  | 541.26        | 271.13          | <b>524.24</b> | 262.62           | 523.25         | <b>262.13</b>    | L    | <b>904.51</b> | 452.76          | 887.49  | 444.25           | 886.50         | 443.76           | 8  |
| 6  | 612.30        | 306.65          | 595.27        | 298.14           | <b>594.29</b>  | 297.65           | A    | <b>791.43</b> | 396.22          | 774.40  | 387.71           | 773.42         | 387.21           | 7  |
| 7  | 711.37        | 356.19          | 694.34        | 347.67           | <b>693.36</b>  | 347.18           | V    | <b>720.39</b> | 360.70          | 703.37  | 352.19           | 702.38         | 351.69           | 6  |
| 8  | 874.43        | 437.72          | 857.40        | 429.21           | 856.42         | 428.71           | Y    | <b>621.32</b> | 311.17          | 604.30  | 302.65           | <b>603.31</b>  | 302.16           | 5  |
| 9  | 971.48        | 486.25          | 954.46        | 477.73           | 953.47         | 477.24           | P    | <b>458.26</b> | 229.63          | 441.23  | 221.12           | <b>440.25</b>  | 220.63           | 4  |
| 10 | 1070.55       | 535.78          | 1053.53       | 527.27           | 1052.54        | 526.77           | V    | <b>361.21</b> | <b>181.11</b>   | 344.18  | 172.59           | 343.20         | 172.10           | 3  |
| 11 | 1185.58       | 593.29          | 1168.55       | 584.78           | 1167.57        | 584.29           | D    | <b>262.14</b> | 131.57          | 245.11  | 123.06           | <b>244.13</b>  | 122.57           | 2  |
| 12 |               |                 |               |                  |                |                  | K    | <b>147.11</b> | 74.06           | 130.09  | 65.55            |                |                  | 1  |

MS/MS Fragmentation of ID1043 **DIGFTGVFR**

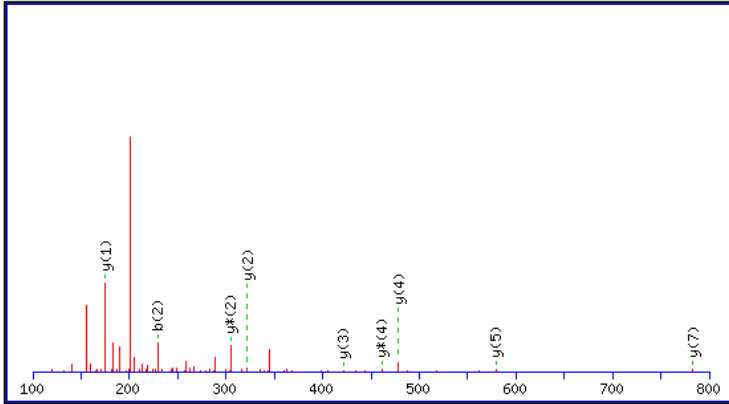

| # | <b>b</b>      | <b>b<sup>++</sup></b> | <b>b<sup>0</sup></b> | <b>b<sup>0++</sup></b> | <b>Seq.</b> | <b>y</b>      | <b>y<sup>++</sup></b> | <b>y<sup>*</sup></b> | <b>y<sup>***</sup></b> | <b>y<sup>0</sup></b> | <b>y<sup>0++</sup></b> | #        |
|---|---------------|-----------------------|----------------------|------------------------|-------------|---------------|-----------------------|----------------------|------------------------|----------------------|------------------------|----------|
| 1 | 116.03        | 58.52                 | 98.02                | 49.52                  | <b>D</b>    |               |                       |                      |                        |                      |                        | <b>9</b> |
| 2 | <b>229.12</b> | 115.06                | 211.11               | 106.06                 | <b>I</b>    | 896.50        | 448.75                | 879.47               | 440.24                 | 878.49               | 439.75                 | <b>8</b> |
| 3 | 286.14        | 143.57                | 268.13               | 134.57                 | <b>G</b>    | <b>783.41</b> | 392.21                | 766.39               | 383.70                 | 765.40               | 383.21                 | <b>7</b> |
| 4 | 433.21        | 217.11                | 415.20               | 208.10                 | <b>F</b>    | 726.39        | 363.70                | 709.37               | 355.19                 | 708.38               | 354.70                 | <b>6</b> |
| 5 | 534.26        | 267.63                | 516.25               | 258.63                 | <b>T</b>    | <b>579.32</b> | 290.17                | 562.30               | 281.65                 | 561.31               | 281.16                 | <b>5</b> |
| 6 | 591.28        | 296.14                | 573.27               | 287.14                 | <b>G</b>    | <b>478.28</b> | 239.64                | <b>461.25</b>        | 231.13                 |                      |                        | <b>4</b> |
| 7 | 690.35        | 345.68                | 672.34               | 336.67                 | <b>V</b>    | <b>421.26</b> | 211.13                | 404.23               | 202.62                 |                      |                        | <b>3</b> |
| 8 | 837.41        | 419.21                | 819.40               | 410.21                 | <b>F</b>    | <b>322.19</b> | 161.60                | <b>305.16</b>        | 153.08                 |                      |                        | <b>2</b> |
| 9 |               |                       |                      |                        | <b>R</b>    | <b>175.12</b> | 88.06                 | 158.09               | 79.55                  |                      |                        | <b>1</b> |

MS/MS Fragmentation of ID1045 **I**ALSAALTNLDSK

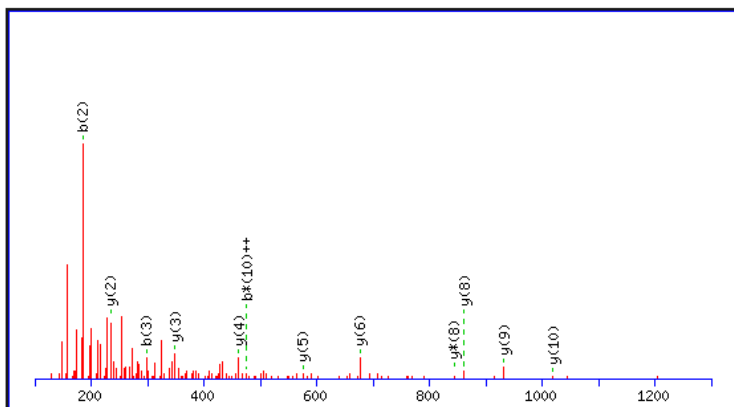

| #         | b             | b <sup>++</sup> | b <sup>*</sup> | b <sup>*++</sup> | b <sup>0</sup> | b <sup>0++</sup> | Seq.     | y              | y <sup>++</sup> | y <sup>*</sup> | y <sup>*++</sup> | y <sup>0</sup> | y <sup>0++</sup> | #         |
|-----------|---------------|-----------------|----------------|------------------|----------------|------------------|----------|----------------|-----------------|----------------|------------------|----------------|------------------|-----------|
| <b>1</b>  | 114.09        | 57.55           |                |                  |                |                  | <b>I</b> |                |                 |                |                  |                |                  | <b>13</b> |
| <b>2</b>  | <b>185.13</b> | 93.07           |                |                  |                |                  | <b>A</b> | 1203.66        | 602.33          | 1186.63        | 593.82           | 1185.65        | 593.33           | <b>12</b> |
| <b>3</b>  | <b>298.21</b> | 149.61          |                |                  |                |                  | <b>L</b> | 1132.62        | 566.81          | 1115.59        | 558.30           | 1114.61        | 557.81           | <b>11</b> |
| <b>4</b>  | 385.24        | 193.13          |                |                  | 367.23         | 184.12           | <b>S</b> | <b>1019.54</b> | 510.27          | 1002.51        | 501.76           | 1001.53        | 501.27           | <b>10</b> |
| <b>5</b>  | 456.28        | 228.64          |                |                  | 438.27         | 219.64           | <b>A</b> | <b>932.50</b>  | 466.76          | 915.48         | 458.24           | 914.49         | 457.75           | <b>9</b>  |
| <b>6</b>  | 527.32        | 264.16          |                |                  | 509.31         | 255.16           | <b>A</b> | <b>861.47</b>  | 431.24          | <b>844.44</b>  | 422.72           | 843.46         | 422.23           | <b>8</b>  |
| <b>7</b>  | 640.40        | 320.71          |                |                  | 622.39         | 311.70           | <b>L</b> | 790.43         | 395.72          | 773.40         | 387.21           | 772.42         | 386.71           | <b>7</b>  |
| <b>8</b>  | 741.45        | 371.23          |                |                  | 723.44         | 362.22           | <b>T</b> | <b>677.35</b>  | 339.18          | 660.32         | 330.66           | 659.34         | 330.17           | <b>6</b>  |
| <b>9</b>  | 855.49        | 428.25          | 838.47         | 419.74           | 837.48         | 419.25           | <b>N</b> | <b>576.30</b>  | 288.65          | 559.27         | 280.14           | 558.29         | 279.65           | <b>5</b>  |
| <b>10</b> | 968.58        | 484.79          | 951.55         | <b>476.28</b>    | 950.57         | 475.79           | <b>L</b> | <b>462.26</b>  | 231.63          | 445.23         | 223.12           | 444.25         | 222.63           | <b>4</b>  |
| <b>11</b> | 1083.60       | 542.31          | 1066.58        | 533.79           | 1065.59        | 533.30           | <b>D</b> | <b>349.17</b>  | 175.09          | 332.15         | 166.58           | 331.16         | 166.08           | <b>3</b>  |
| <b>12</b> | 1170.64       | 585.82          | 1153.61        | 577.31           | 1152.63        | 576.82           | <b>S</b> | <b>234.14</b>  | 117.58          | 217.12         | 109.06           | 216.13         | 108.57           | <b>2</b>  |
| <b>13</b> |               |                 |                |                  |                |                  | <b>K</b> | 147.11         | 74.06           | 130.09         | 65.55            |                |                  | <b>1</b>  |

MS/MS Fragmentation of ID1052 **QGAMILIVPR**

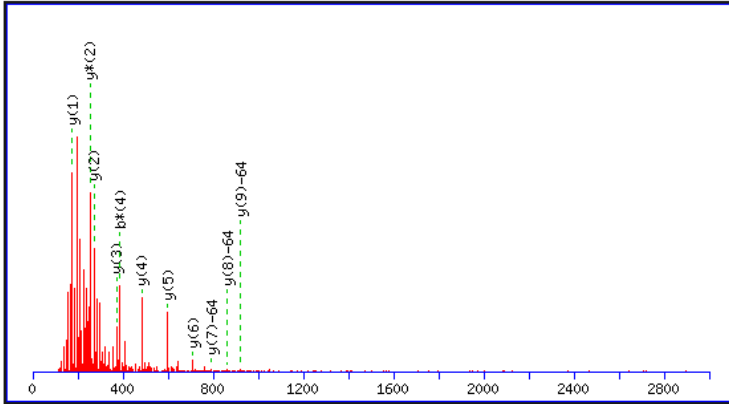

| #         | <b>b</b> | <b>b<sup>++</sup></b> | <b>b<sup>*</sup></b> | <b>b<sup>*++</sup></b> | <b>Seq.</b> | <b>y</b>      | <b>y<sup>++</sup></b> | <b>y<sup>*</sup></b> | <b>y<sup>*++</sup></b> | #         |
|-----------|----------|-----------------------|----------------------|------------------------|-------------|---------------|-----------------------|----------------------|------------------------|-----------|
| <b>1</b>  | 129.07   | 65.04                 | 112.04               | 56.52                  | <b>Q</b>    |               |                       |                      |                        | <b>10</b> |
| <b>2</b>  | 186.09   | 93.55                 | 169.06               | 85.03                  | <b>G</b>    | <b>921.59</b> | 461.30                | 904.56               | 452.78                 | <b>9</b>  |
| <b>3</b>  | 257.12   | 129.07                | 240.10               | 120.55                 | <b>A</b>    | <b>864.57</b> | 432.79                | 847.54               | 424.27                 | <b>8</b>  |
| <b>4</b>  | 340.16   | 170.58                | 323.14               | 162.07                 | <b>M</b>    | <b>793.53</b> | 397.27                | 776.50               | 388.76                 | <b>7</b>  |
| <b>5</b>  | 453.25   | 227.13                | 436.22               | 218.61                 | <b>I</b>    | <b>710.49</b> | 355.75                | 693.47               | 347.24                 | <b>6</b>  |
| <b>6</b>  | 566.33   | 283.67                | 549.30               | 275.16                 | <b>L</b>    | <b>597.41</b> | 299.21                | 580.38               | 290.69                 | <b>5</b>  |
| <b>7</b>  | 679.41   | 340.21                | 662.39               | 331.70                 | <b>I</b>    | <b>484.32</b> | 242.67                | 467.30               | 234.15                 | <b>4</b>  |
| <b>8</b>  | 778.48   | 389.74                | 761.46               | 381.23                 | <b>V</b>    | <b>371.24</b> | 186.12                | 354.21               | 177.61                 | <b>3</b>  |
| <b>9</b>  | 875.53   | 438.27                | 858.51               | 429.76                 | <b>P</b>    | <b>272.17</b> | 136.59                | <b>255.15</b>        | 128.08                 | <b>2</b>  |
| <b>10</b> |          |                       |                      |                        | <b>R</b>    | <b>175.12</b> | 88.06                 | 158.09               | 79.55                  | <b>1</b>  |

MS/MS Fragmentation of ID1053 **AEDLALDLQELR**

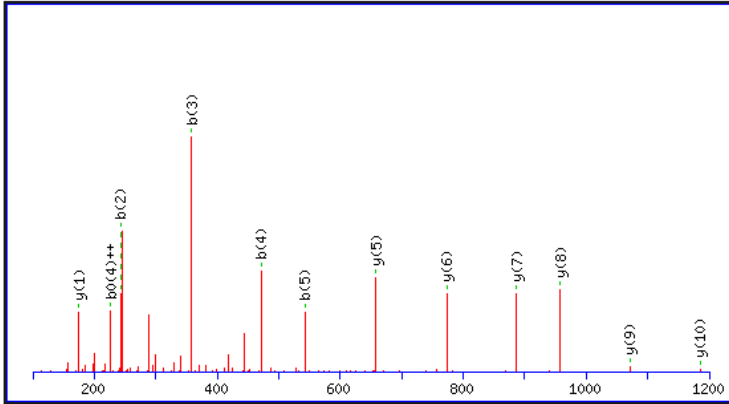

| #         | <b>b</b>      | <b>b<sup>++</sup></b> | <b>b<sup>*</sup></b> | <b>b<sup>*++</sup></b> | <b>b<sup>0</sup></b> | <b>b<sup>0++</sup></b> | Seq.     | <b>y</b>       | <b>y<sup>++</sup></b> | <b>y<sup>*</sup></b> | <b>y<sup>*++</sup></b> | <b>y<sup>0</sup></b> | <b>y<sup>0++</sup></b> | #         |
|-----------|---------------|-----------------------|----------------------|------------------------|----------------------|------------------------|----------|----------------|-----------------------|----------------------|------------------------|----------------------|------------------------|-----------|
| <b>1</b>  | 114.05        | 57.53                 |                      |                        |                      |                        | <b>A</b> |                |                       |                      |                        |                      |                        | <b>12</b> |
| <b>2</b>  | <b>243.10</b> | 122.05                |                      |                        | 225.09               | 113.05                 | <b>E</b> | 1314.69        | 657.85                | 1297.66              | 649.34                 | 1296.68              | 648.84                 | <b>11</b> |
| <b>3</b>  | <b>358.12</b> | 179.57                |                      |                        | 340.11               | 170.56                 | <b>D</b> | <b>1185.65</b> | 593.33                | 1168.62              | 584.81                 | 1167.64              | 584.32                 | <b>10</b> |
| <b>4</b>  | <b>471.21</b> | 236.11                |                      |                        | 453.20               | <b>227.10</b>          | <b>L</b> | <b>1070.62</b> | 535.81                | 1053.59              | 527.30                 | 1052.61              | 526.81                 | <b>9</b>  |
| <b>5</b>  | <b>542.25</b> | 271.63                |                      |                        | 524.24               | 262.62                 | <b>A</b> | <b>957.54</b>  | 479.27                | 940.51               | 470.76                 | 939.53               | 470.27                 | <b>8</b>  |
| <b>6</b>  | 655.33        | 328.17                |                      |                        | 637.32               | 319.16                 | <b>L</b> | <b>886.50</b>  | 443.75                | 869.47               | 435.24                 | 868.49               | 434.75                 | <b>7</b>  |
| <b>7</b>  | 770.36        | 385.68                |                      |                        | 752.35               | 376.68                 | <b>D</b> | <b>773.42</b>  | 387.21                | 756.39               | 378.70                 | 755.40               | 378.21                 | <b>6</b>  |
| <b>8</b>  | 883.44        | 442.22                |                      |                        | 865.43               | 433.22                 | <b>L</b> | <b>658.39</b>  | 329.70                | 641.36               | 321.18                 | 640.38               | 320.69                 | <b>5</b>  |
| <b>9</b>  | 1011.50       | 506.25                | 994.47               | 497.74                 | 993.49               | 497.25                 | <b>Q</b> | 545.30         | 273.16                | 528.28               | 264.64                 | 527.29               | 264.15                 | <b>4</b>  |
| <b>10</b> | 1140.54       | 570.77                | 1123.52              | 562.26                 | 1122.53              | 561.77                 | <b>E</b> | 417.25         | 209.13                | 400.22               | 200.61                 | 399.24               | 200.12                 | <b>3</b>  |
| <b>11</b> | 1253.63       | 627.32                | 1236.60              | 618.80                 | 1235.62              | 618.31                 | <b>L</b> | 288.20         | 144.61                | 271.18               | 136.09                 |                      |                        | <b>2</b>  |
| <b>12</b> |               |                       |                      |                        |                      |                        | <b>R</b> | <b>175.12</b>  | 88.06                 | 158.09               | 79.55                  |                      |                        | <b>1</b>  |



MS/MS Fragmentation of ID1054 **VVVDGNLITSR**

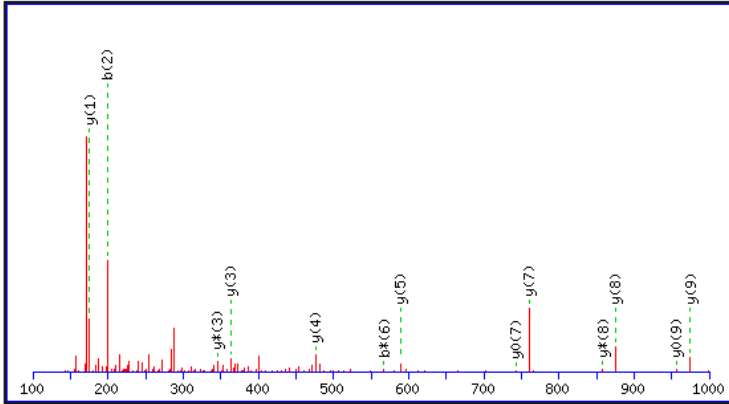

| #  | b             | b <sup>++</sup> | b <sup>*</sup> | b <sup>*++</sup> | b <sup>0</sup> | b <sup>0++</sup> | Seq. | y             | y <sup>++</sup> | y <sup>*</sup> | y <sup>*++</sup> | y <sup>0</sup> | y <sup>0++</sup> | #  |
|----|---------------|-----------------|----------------|------------------|----------------|------------------|------|---------------|-----------------|----------------|------------------|----------------|------------------|----|
| 1  | 100.08        | 50.54           |                |                  |                |                  | V    |               |                 |                |                  |                |                  | 11 |
| 2  | <b>199.14</b> | 100.08          |                |                  |                |                  | V    | 1073.59       | 537.30          | 1056.57        | 528.79           | 1055.58        | 528.30           | 10 |
| 3  | 298.21        | 149.61          |                |                  |                |                  | V    | <b>974.53</b> | 487.77          | 957.50         | 479.25           | <b>956.52</b>  | 478.76           | 9  |
| 4  | 413.24        | 207.12          |                |                  | 395.23         | 198.12           | D    | <b>875.46</b> | 438.23          | <b>858.43</b>  | 429.72           | 857.45         | 429.23           | 8  |
| 5  | 470.26        | 235.63          |                |                  | 452.25         | 226.63           | G    | <b>760.43</b> | 380.72          | 743.40         | 372.21           | <b>742.42</b>  | 371.71           | 7  |
| 6  | 584.30        | 292.66          | <b>567.28</b>  | 284.14           | 566.29         | 283.65           | N    | 703.41        | 352.21          | 686.38         | 343.70           | 685.40         | 343.20           | 6  |
| 7  | 697.39        | 349.20          | 680.36         | 340.68           | 679.38         | 340.19           | L    | <b>589.37</b> | 295.19          | 572.34         | 286.67           | 571.36         | 286.18           | 5  |
| 8  | 810.47        | 405.74          | 793.45         | 397.23           | 792.46         | 396.73           | I    | <b>476.28</b> | 238.64          | 459.26         | 230.13           | 458.27         | 229.64           | 4  |
| 9  | 911.52        | 456.26          | 894.49         | 447.75           | 893.51         | 447.26           | T    | <b>363.20</b> | 182.10          | <b>346.17</b>  | 173.59           | 345.19         | 173.10           | 3  |
| 10 | 998.55        | 499.78          | 981.53         | 491.27           | 980.54         | 490.77           | S    | 262.15        | 131.58          | 245.12         | 123.07           | 244.14         | 122.57           | 2  |
| 11 |               |                 |                |                  |                |                  | R    | <b>175.12</b> | 88.06           | 158.09         | 79.55            |                |                  | 1  |

MS/MS Fragmentation of ID1055 **VDGSSPLVLDGADLK**

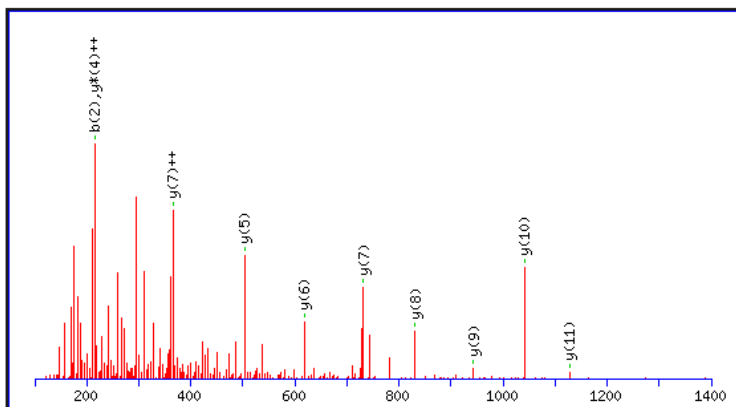

| #         | <b>b</b>      | <b>b<sup>++</sup></b> | <b>b<sup>0</sup></b> | <b>b<sup>0++</sup></b> | Seq.     | <b>y</b>       | <b>y<sup>++</sup></b> | <b>y<sup>*</sup></b> | <b>y<sup>*++</sup></b> | <b>y<sup>0</sup></b> | <b>y<sup>0++</sup></b> | #         |
|-----------|---------------|-----------------------|----------------------|------------------------|----------|----------------|-----------------------|----------------------|------------------------|----------------------|------------------------|-----------|
| <b>1</b>  | 100.08        | 50.54                 |                      |                        | <b>V</b> |                |                       |                      |                        |                      |                        | <b>15</b> |
| <b>2</b>  | <b>215.10</b> | 108.05                | 197.09               | 99.05                  | <b>D</b> | 1386.71        | 693.86                | 1369.68              | 685.35                 | 1368.70              | 684.85                 | <b>14</b> |
| <b>3</b>  | 272.12        | 136.57                | 254.11               | 127.56                 | <b>G</b> | 1271.68        | 636.35                | 1254.66              | 627.83                 | 1253.67              | 627.34                 | <b>13</b> |
| <b>4</b>  | 359.16        | 180.08                | 341.15               | 171.08                 | <b>S</b> | 1214.66        | 607.83                | 1197.64              | 599.32                 | 1196.65              | 598.83                 | <b>12</b> |
| <b>5</b>  | 446.19        | 223.60                | 428.18               | 214.59                 | <b>S</b> | <b>1127.63</b> | 564.32                | 1110.60              | 555.81                 | 1109.62              | 555.31                 | <b>11</b> |
| <b>6</b>  | 543.24        | 272.12                | 525.23               | 263.12                 | <b>P</b> | <b>1040.60</b> | 520.80                | 1023.57              | 512.29                 | 1022.59              | 511.80                 | <b>10</b> |
| <b>7</b>  | 656.32        | 328.67                | 638.31               | 319.66                 | <b>L</b> | <b>943.55</b>  | 472.28                | 926.52               | 463.76                 | 925.54               | 463.27                 | <b>9</b>  |
| <b>8</b>  | 755.39        | 378.20                | 737.38               | 369.20                 | <b>V</b> | <b>830.46</b>  | 415.73                | 813.44               | 407.22                 | 812.45               | 406.73                 | <b>8</b>  |
| <b>9</b>  | 868.48        | 434.74                | 850.47               | 425.74                 | <b>L</b> | <b>731.39</b>  | <b>366.20</b>         | 714.37               | 357.69                 | 713.38               | 357.20                 | <b>7</b>  |
| <b>10</b> | 983.50        | 492.26                | 965.49               | 483.25                 | <b>D</b> | <b>618.31</b>  | 309.66                | 601.28               | 301.15                 | 600.30               | 300.65                 | <b>6</b>  |
| <b>11</b> | 1040.53       | 520.77                | 1022.52              | 511.76                 | <b>G</b> | <b>503.28</b>  | 252.14                | 486.26               | 243.63                 | 485.27               | 243.14                 | <b>5</b>  |
| <b>12</b> | 1111.56       | 556.29                | 1093.55              | 547.28                 | <b>A</b> | 446.26         | 223.63                | 429.23               | <b>215.12</b>          | 428.25               | 214.63                 | <b>4</b>  |
| <b>13</b> | 1226.59       | 613.80                | 1208.58              | 604.79                 | <b>D</b> | 375.22         | 188.12                | 358.20               | 179.60                 | 357.21               | 179.11                 | <b>3</b>  |
| <b>14</b> | 1339.67       | 670.34                | 1321.66              | 661.34                 | <b>L</b> | 260.20         | 130.60                | 243.17               | 122.09                 |                      |                        | <b>2</b>  |
| <b>15</b> |               |                       |                      |                        | <b>K</b> | 147.11         | 74.06                 | 130.09               | 65.55                  |                      |                        | <b>1</b>  |

MS/MS Fragmentation of ID1058 **LLTELVFEDLK**

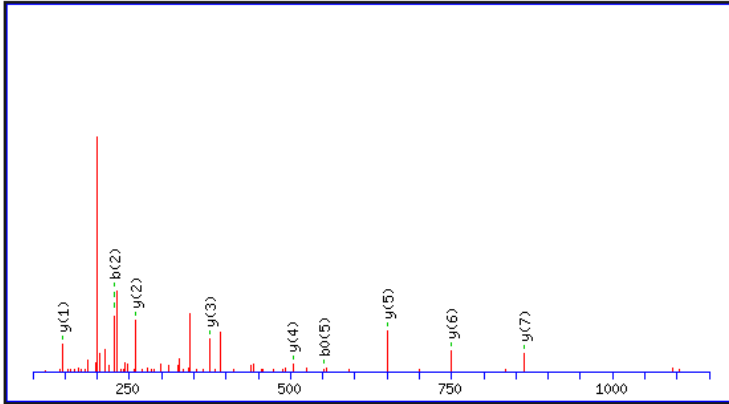

| #         | <b>b</b>      | <b>b<sup>++</sup></b> | <b>b<sup>0</sup></b> | <b>b<sup>0++</sup></b> | Seq.     | <b>y</b>      | <b>y<sup>++</sup></b> | <b>y<sup>*</sup></b> | <b>y<sup>*++</sup></b> | <b>y<sup>0</sup></b> | <b>y<sup>0++</sup></b> | #         |
|-----------|---------------|-----------------------|----------------------|------------------------|----------|---------------|-----------------------|----------------------|------------------------|----------------------|------------------------|-----------|
| <b>1</b>  | 114.09        | 57.55                 |                      |                        | <b>L</b> |               |                       |                      |                        |                      |                        | <b>11</b> |
| <b>2</b>  | <b>227.18</b> | 114.09                |                      |                        | <b>L</b> | 1206.66       | 603.83                | 1189.64              | 595.32                 | 1188.65              | 594.83                 | <b>10</b> |
| <b>3</b>  | 328.22        | 164.62                | 310.21               | 155.61                 | <b>T</b> | 1093.58       | 547.29                | 1076.55              | 538.78                 | 1075.57              | 538.29                 | <b>9</b>  |
| <b>4</b>  | 457.27        | 229.14                | 439.26               | 220.13                 | <b>E</b> | 992.53        | 496.77                | 975.50               | 488.26                 | 974.52               | 487.76                 | <b>8</b>  |
| <b>5</b>  | 570.35        | 285.68                | <b>552.34</b>        | 276.67                 | <b>L</b> | <b>863.49</b> | 432.25                | 846.46               | 423.73                 | 845.48               | 423.24                 | <b>7</b>  |
| <b>6</b>  | 669.42        | 335.21                | 651.41               | 326.21                 | <b>V</b> | <b>750.40</b> | 375.71                | 733.38               | 367.19                 | 732.39               | 366.70                 | <b>6</b>  |
| <b>7</b>  | 816.49        | 408.75                | 798.48               | 399.74                 | <b>F</b> | <b>651.33</b> | 326.17                | 634.31               | 317.66                 | 633.32               | 317.17                 | <b>5</b>  |
| <b>8</b>  | 945.53        | 473.27                | 927.52               | 464.26                 | <b>E</b> | <b>504.27</b> | 252.64                | 487.24               | 244.12                 | 486.26               | 243.63                 | <b>4</b>  |
| <b>9</b>  | 1060.56       | 530.78                | 1042.55              | 521.78                 | <b>D</b> | <b>375.22</b> | 188.12                | 358.20               | 179.60                 | 357.21               | 179.11                 | <b>3</b>  |
| <b>10</b> | 1173.64       | 587.32                | 1155.63              | 578.32                 | <b>L</b> | <b>260.20</b> | 130.60                | 243.17               | 122.09                 |                      |                        | <b>2</b>  |
| <b>11</b> |               |                       |                      |                        | <b>K</b> | <b>147.11</b> | 74.06                 | 130.09               | 65.55                  |                      |                        | <b>1</b>  |

MS/MS Fragmentation of ID1059 **SLESTLATGNLQK**

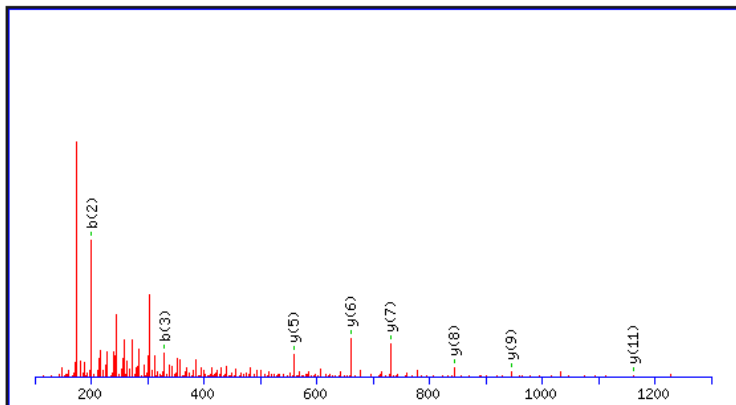

| #         | <b>b</b>      | <b>b<sup>++</sup></b> | <b>b<sup>*</sup></b> | <b>b<sup>*++</sup></b> | <b>b<sup>0</sup></b> | <b>b<sup>0++</sup></b> | Seq.     | <b>y</b>       | <b>y<sup>++</sup></b> | <b>y<sup>*</sup></b> | <b>y<sup>*++</sup></b> | <b>y<sup>0</sup></b> | <b>y<sup>0++</sup></b> | #         |
|-----------|---------------|-----------------------|----------------------|------------------------|----------------------|------------------------|----------|----------------|-----------------------|----------------------|------------------------|----------------------|------------------------|-----------|
| <b>1</b>  | 88.04         | 44.52                 |                      |                        | 70.03                | 35.52                  | <b>S</b> |                |                       |                      |                        |                      |                        | <b>13</b> |
| <b>2</b>  | <b>201.12</b> | 101.07                |                      |                        | 183.11               | 92.06                  | <b>L</b> | 1274.70        | 637.85                | 1257.67              | 629.34                 | 1256.68              | 628.85                 | <b>12</b> |
| <b>3</b>  | <b>330.17</b> | 165.59                |                      |                        | 312.16               | 156.58                 | <b>E</b> | <b>1161.61</b> | 581.31                | 1144.58              | 572.80                 | 1143.60              | 572.30                 | <b>11</b> |
| <b>4</b>  | 417.20        | 209.10                |                      |                        | 399.19               | 200.10                 | <b>S</b> | 1032.57        | 516.79                | 1015.54              | 508.27                 | 1014.56              | 507.78                 | <b>10</b> |
| <b>5</b>  | 518.25        | 259.63                |                      |                        | 500.24               | 250.62                 | <b>T</b> | <b>945.54</b>  | 473.27                | 928.51               | 464.76                 | 927.53               | 464.27                 | <b>9</b>  |
| <b>6</b>  | 631.33        | 316.17                |                      |                        | 613.32               | 307.16                 | <b>L</b> | <b>844.49</b>  | 422.75                | 827.46               | 414.23                 | 826.48               | 413.74                 | <b>8</b>  |
| <b>7</b>  | 702.37        | 351.69                |                      |                        | 684.36               | 342.68                 | <b>A</b> | <b>731.40</b>  | 366.21                | 714.38               | 357.69                 | 713.39               | 357.20                 | <b>7</b>  |
| <b>8</b>  | 803.41        | 402.21                |                      |                        | 785.40               | 393.21                 | <b>T</b> | <b>660.37</b>  | 330.69                | 643.34               | 322.17                 | 642.36               | 321.68                 | <b>6</b>  |
| <b>9</b>  | 860.44        | 430.72                |                      |                        | 842.43               | 421.72                 | <b>G</b> | <b>559.32</b>  | 280.16                | 542.29               | 271.65                 |                      |                        | <b>5</b>  |
| <b>10</b> | 974.48        | 487.74                | 957.45               | 479.23                 | 956.47               | 478.74                 | <b>N</b> | 502.30         | 251.65                | 485.27               | 243.14                 |                      |                        | <b>4</b>  |
| <b>11</b> | 1087.56       | 544.29                | 1070.54              | 535.77                 | 1069.55              | 535.28                 | <b>L</b> | 388.26         | 194.63                | 371.23               | 186.12                 |                      |                        | <b>3</b>  |
| <b>12</b> | 1215.62       | 608.31                | 1198.60              | 599.80                 | 1197.61              | 599.31                 | <b>Q</b> | 275.17         | 138.09                | 258.14               | 129.58                 |                      |                        | <b>2</b>  |
| <b>13</b> |               |                       |                      |                        |                      |                        | <b>K</b> | 147.11         | 74.06                 | 130.09               | 65.55                  |                      |                        | <b>1</b>  |

MS/MS Fragmentation of ID1060 **SLPLSTLIEILK**

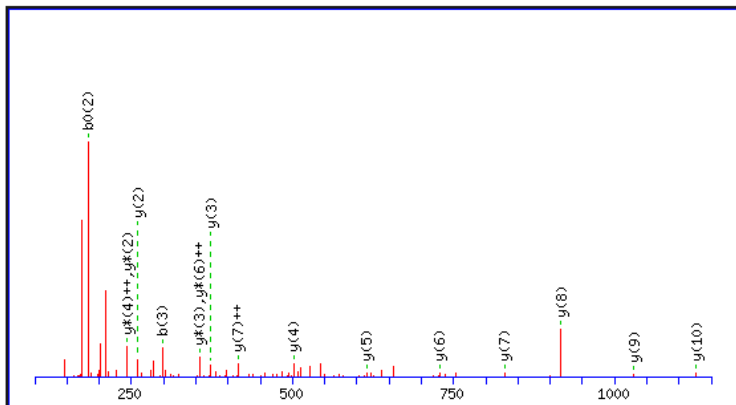

| #         | <b>b</b>      | <b>b<sup>++</sup></b> | <b>b<sup>0</sup></b> | <b>b<sup>0++</sup></b> | Seq.     | <b>y</b>       | <b>y<sup>++</sup></b> | <b>y<sup>*</sup></b> | <b>y<sup>*++</sup></b> | <b>y<sup>0</sup></b> | <b>y<sup>0++</sup></b> | #         |
|-----------|---------------|-----------------------|----------------------|------------------------|----------|----------------|-----------------------|----------------------|------------------------|----------------------|------------------------|-----------|
| <b>1</b>  | 88.04         | 44.52                 | 70.03                | 35.52                  | <b>S</b> |                |                       |                      |                        |                      |                        | <b>12</b> |
| <b>2</b>  | 201.12        | 101.07                | <b>183.11</b>        | 92.06                  | <b>L</b> | 1239.79        | 620.40                | 1222.77              | 611.89                 | 1221.78              | 611.39                 | <b>11</b> |
| <b>3</b>  | <b>298.18</b> | 149.59                | 280.17               | 140.59                 | <b>P</b> | <b>1126.71</b> | 563.86                | 1109.68              | 555.34                 | 1108.70              | 554.85                 | <b>10</b> |
| <b>4</b>  | 411.26        | 206.13                | 393.25               | 197.13                 | <b>L</b> | <b>1029.66</b> | 515.33                | 1012.63              | 506.82                 | 1011.64              | 506.33                 | <b>9</b>  |
| <b>5</b>  | 498.29        | 249.65                | 480.28               | 240.64                 | <b>S</b> | <b>916.57</b>  | 458.79                | 899.54               | 450.28                 | 898.56               | 449.78                 | <b>8</b>  |
| <b>6</b>  | 599.34        | 300.17                | 581.33               | 291.17                 | <b>T</b> | <b>829.54</b>  | <b>415.27</b>         | 812.51               | 406.76                 | 811.53               | 406.27                 | <b>7</b>  |
| <b>7</b>  | 712.42        | 356.72                | 694.41               | 347.71                 | <b>L</b> | <b>728.49</b>  | 364.75                | 711.47               | <b>356.24</b>          | 710.48               | 355.74                 | <b>6</b>  |
| <b>8</b>  | 825.51        | 413.26                | 807.50               | 404.25                 | <b>I</b> | <b>615.41</b>  | 308.21                | 598.38               | 299.69                 | 597.40               | 299.20                 | <b>5</b>  |
| <b>9</b>  | 954.55        | 477.78                | 936.54               | 468.77                 | <b>E</b> | <b>502.32</b>  | 251.67                | 485.30               | <b>243.15</b>          | 484.31               | 242.66                 | <b>4</b>  |
| <b>10</b> | 1067.63       | 534.32                | 1049.62              | 525.32                 | <b>I</b> | <b>373.28</b>  | 187.14                | <b>356.25</b>        | 178.63                 |                      |                        | <b>3</b>  |
| <b>11</b> | 1180.72       | 590.86                | 1162.71              | 581.86                 | <b>L</b> | <b>260.20</b>  | 130.60                | <b>243.17</b>        | 122.09                 |                      |                        | <b>2</b>  |
| <b>12</b> |               |                       |                      |                        | <b>K</b> | 147.11         | 74.06                 | 130.09               | 65.55                  |                      |                        | <b>1</b>  |

MS/MS Fragmentation of ID1061 **SLPLSTLIEILK**



| #         | b             | b <sup>++</sup> | b <sup>0</sup> | b <sup>0++</sup> | Seq.     | y              | y <sup>++</sup> | y*            | y <sup>*++</sup> | y <sup>0</sup> | y <sup>0++</sup> | #         |
|-----------|---------------|-----------------|----------------|------------------|----------|----------------|-----------------|---------------|------------------|----------------|------------------|-----------|
| <b>1</b>  | 88.04         | 44.52           | 70.03          | 35.52            | <b>S</b> |                |                 |               |                  |                |                  | <b>12</b> |
| <b>2</b>  | 201.12        | 101.07          | <b>183.11</b>  | 92.06            | <b>L</b> | 1239.79        | 620.40          | 1222.77       | 611.89           | 1221.78        | 611.39           | <b>11</b> |
| <b>3</b>  | <b>298.18</b> | 149.59          | 280.17         | 140.59           | <b>P</b> | <b>1126.71</b> | 563.86          | 1109.68       | 555.34           | 1108.70        | 554.85           | <b>10</b> |
| <b>4</b>  | 411.26        | 206.13          | 393.25         | 197.13           | <b>L</b> | <b>1029.66</b> | 515.33          | 1012.63       | 506.82           | 1011.64        | 506.33           | <b>9</b>  |
| <b>5</b>  | 498.29        | 249.65          | 480.28         | 240.64           | <b>S</b> | <b>916.57</b>  | 458.79          | 899.54        | 450.28           | 898.56         | 449.78           | <b>8</b>  |
| <b>6</b>  | 599.34        | 300.17          | 581.33         | 291.17           | <b>T</b> | <b>829.54</b>  | <b>415.27</b>   | 812.51        | 406.76           | 811.53         | 406.27           | <b>7</b>  |
| <b>7</b>  | 712.42        | 356.72          | 694.41         | 347.71           | <b>L</b> | <b>728.49</b>  | 364.75          | 711.47        | <b>356.24</b>    | 710.48         | 355.74           | <b>6</b>  |
| <b>8</b>  | 825.51        | 413.26          | 807.50         | 404.25           | <b>I</b> | <b>615.41</b>  | 308.21          | 598.38        | 299.69           | 597.40         | 299.20           | <b>5</b>  |
| <b>9</b>  | 954.55        | 477.78          | 936.54         | 468.77           | <b>E</b> | <b>502.32</b>  | 251.67          | 485.30        | <b>243.15</b>    | 484.31         | 242.66           | <b>4</b>  |
| <b>10</b> | 1067.63       | 534.32          | 1049.62        | 525.32           | <b>I</b> | <b>373.28</b>  | 187.14          | <b>356.25</b> | 178.63           |                |                  | <b>3</b>  |
| <b>11</b> | 1180.72       | 590.86          | 1162.71        | 581.86           | <b>L</b> | <b>260.20</b>  | 130.60          | <b>243.17</b> | 122.09           |                |                  | <b>2</b>  |
| <b>12</b> |               |                 |                |                  | <b>K</b> | 147.11         | 74.06           | 130.09        | 65.55            |                |                  | <b>1</b>  |

MS/MS Fragmentation of ID1062 **MDSFLGLLR**

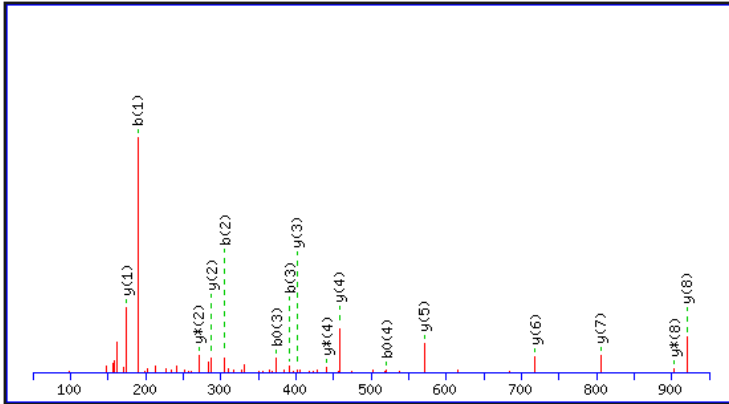

| # | <b>b</b>      | <b>b<sup>++</sup></b> | <b>b<sup>0</sup></b> | <b>b<sup>0++</sup></b> | <b>Seq.</b> | <b>y</b>      | <b>y<sup>++</sup></b> | <b>y<sup>*</sup></b> | <b>y<sup>+++</sup></b> | <b>y<sup>0</sup></b> | <b>y<sup>0++</sup></b> | #        |
|---|---------------|-----------------------|----------------------|------------------------|-------------|---------------|-----------------------|----------------------|------------------------|----------------------|------------------------|----------|
| 1 | <b>190.05</b> | 95.53                 |                      |                        | <b>M</b>    |               |                       |                      |                        |                      |                        | <b>9</b> |
| 2 | <b>305.08</b> | 153.04                | 287.07               | 144.04                 | <b>D</b>    | <b>920.52</b> | 460.76                | <b>903.49</b>        | 452.25                 | 902.51               | 451.76                 | <b>8</b> |
| 3 | <b>392.11</b> | 196.56                | <b>374.10</b>        | 187.55                 | <b>S</b>    | <b>805.49</b> | 403.25                | 788.47               | 394.74                 | 787.48               | 394.24                 | <b>7</b> |
| 4 | 539.18        | 270.09                | <b>521.17</b>        | 261.09                 | <b>F</b>    | <b>718.46</b> | 359.73                | 701.43               | 351.22                 |                      |                        | <b>6</b> |
| 5 | 652.26        | 326.64                | 634.25               | 317.63                 | <b>L</b>    | <b>571.39</b> | 286.20                | 554.37               | 277.69                 |                      |                        | <b>5</b> |
| 6 | 709.29        | 355.15                | 691.28               | 346.14                 | <b>G</b>    | <b>458.31</b> | 229.66                | <b>441.28</b>        | 221.14                 |                      |                        | <b>4</b> |
| 7 | 822.37        | 411.69                | 804.36               | 402.68                 | <b>L</b>    | <b>401.29</b> | 201.15                | 384.26               | 192.63                 |                      |                        | <b>3</b> |
| 8 | 935.45        | 468.23                | 917.44               | 459.23                 | <b>L</b>    | <b>288.20</b> | 144.61                | <b>271.18</b>        | 136.09                 |                      |                        | <b>2</b> |
| 9 |               |                       |                      |                        | <b>R</b>    | <b>175.12</b> | 88.06                 | 158.09               | 79.55                  |                      |                        | <b>1</b> |

MS/MS Fragmentation of ID1063 **FIEAIADNTK**

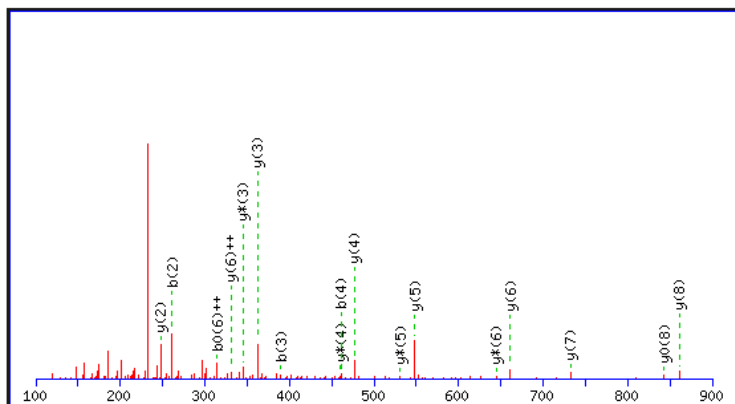

| #         | b             | b <sup>++</sup> | b <sup>*</sup> | b <sup>*++</sup> | b <sup>0</sup> | b <sup>0++</sup> | Seq.     | y             | y <sup>++</sup> | y <sup>*</sup> | y <sup>*++</sup> | y <sup>0</sup> | y <sup>0++</sup> | #         |
|-----------|---------------|-----------------|----------------|------------------|----------------|------------------|----------|---------------|-----------------|----------------|------------------|----------------|------------------|-----------|
| <b>1</b>  | 148.08        | 74.54           |                |                  |                |                  | <b>F</b> |               |                 |                |                  |                |                  | <b>10</b> |
| <b>2</b>  | <b>261.16</b> | 131.08          |                |                  |                |                  | <b>I</b> | 974.52        | 487.76          | 957.49         | 479.25           | 956.50         | 478.76           | <b>9</b>  |
| <b>3</b>  | <b>390.20</b> | 195.60          |                |                  | 372.19         | 186.60           | <b>E</b> | <b>861.43</b> | 431.22          | 844.40         | 422.71           | <b>843.42</b>  | 422.21           | <b>8</b>  |
| <b>4</b>  | <b>461.24</b> | 231.12          |                |                  | 443.23         | 222.12           | <b>A</b> | <b>732.39</b> | 366.70          | 715.36         | 358.18           | 714.38         | 357.69           | <b>7</b>  |
| <b>5</b>  | 574.32        | 287.67          |                |                  | 556.31         | 278.66           | <b>I</b> | <b>661.35</b> | <b>331.18</b>   | <b>644.32</b>  | 322.67           | 643.34         | 322.17           | <b>6</b>  |
| <b>6</b>  | 645.36        | 323.18          |                |                  | 627.35         | <b>314.18</b>    | <b>A</b> | <b>548.27</b> | 274.64          | <b>531.24</b>  | 266.12           | 530.26         | 265.63           | <b>5</b>  |
| <b>7</b>  | 760.39        | 380.70          |                |                  | 742.38         | 371.69           | <b>D</b> | <b>477.23</b> | 239.12          | <b>460.20</b>  | 230.61           | 459.22         | 230.11           | <b>4</b>  |
| <b>8</b>  | 874.43        | 437.72          | 857.40         | 429.21           | 856.42         | 428.71           | <b>N</b> | <b>362.20</b> | 181.61          | <b>345.18</b>  | 173.09           | 344.19         | 172.60           | <b>3</b>  |
| <b>9</b>  | 975.48        | 488.24          | 958.45         | 479.73           | 957.47         | 479.24           | <b>T</b> | <b>248.16</b> | 124.58          | 231.13         | 116.07           | 230.15         | 115.58           | <b>2</b>  |
| <b>10</b> |               |                 |                |                  |                |                  | <b>K</b> | 147.11        | 74.06           | 130.09         | 65.55            |                |                  | <b>1</b>  |



MS/MS Fragmentation of ID1064 **DIMASLLSR**

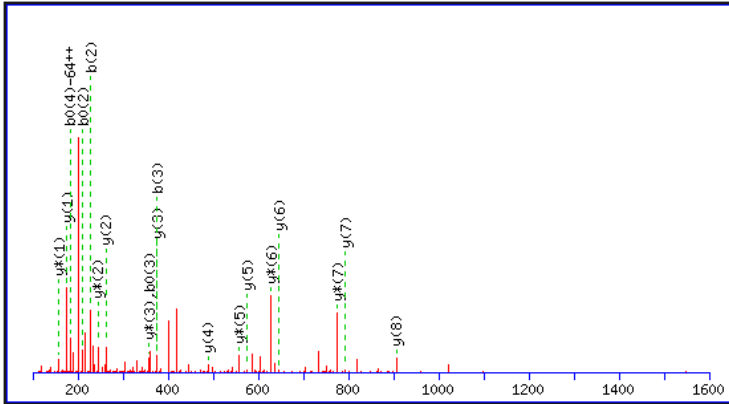

| # | <b>b</b>      | <b>b<sup>++</sup></b> | <b>b<sup>0</sup></b> | <b>b<sup>0++</sup></b> | <b>Seq.</b> | <b>y</b>      | <b>y<sup>++</sup></b> | <b>y<sup>*</sup></b> | <b>y<sup>***</sup></b> | <b>y<sup>0</sup></b> | <b>y<sup>0++</sup></b> | #        |
|---|---------------|-----------------------|----------------------|------------------------|-------------|---------------|-----------------------|----------------------|------------------------|----------------------|------------------------|----------|
| 1 | 116.03        | 58.52                 | 98.02                | 49.52                  | <b>D</b>    |               |                       |                      |                        |                      |                        | <b>9</b> |
| 2 | <b>229.12</b> | 115.06                | <b>211.11</b>        | 106.06                 | <b>I</b>    | <b>906.51</b> | 453.76                | 889.48               | 445.24                 | 888.50               | 444.75                 | <b>8</b> |
| 3 | <b>376.15</b> | 188.58                | <b>358.14</b>        | 179.58                 | <b>M</b>    | <b>793.42</b> | 397.22                | <b>776.40</b>        | 388.70                 | 775.41               | 388.21                 | <b>7</b> |
| 4 | 447.19        | 224.10                | 429.18               | 215.09                 | <b>A</b>    | <b>646.39</b> | 323.70                | <b>629.36</b>        | 315.18                 | 628.38               | 314.69                 | <b>6</b> |
| 5 | 534.22        | 267.62                | 516.21               | 258.61                 | <b>S</b>    | <b>575.35</b> | 288.18                | <b>558.32</b>        | 279.67                 | 557.34               | 279.17                 | <b>5</b> |
| 6 | 647.31        | 324.16                | 629.30               | 315.15                 | <b>L</b>    | <b>488.32</b> | 244.66                | 471.29               | 236.15                 | 470.31               | 235.66                 | <b>4</b> |
| 7 | 760.39        | 380.70                | 742.38               | 371.69                 | <b>L</b>    | <b>375.24</b> | 188.12                | <b>358.21</b>        | 179.61                 | 357.22               | 179.12                 | <b>3</b> |
| 8 | 847.42        | 424.22                | 829.41               | 415.21                 | <b>S</b>    | <b>262.15</b> | 131.58                | <b>245.12</b>        | 123.07                 | 244.14               | 122.57                 | <b>2</b> |
| 9 |               |                       |                      |                        | <b>R</b>    | <b>175.12</b> | 88.06                 | <b>158.09</b>        | 79.55                  |                      |                        | <b>1</b> |

MS/MS Fragmentation of ID1065 **IIMPSSALDR**

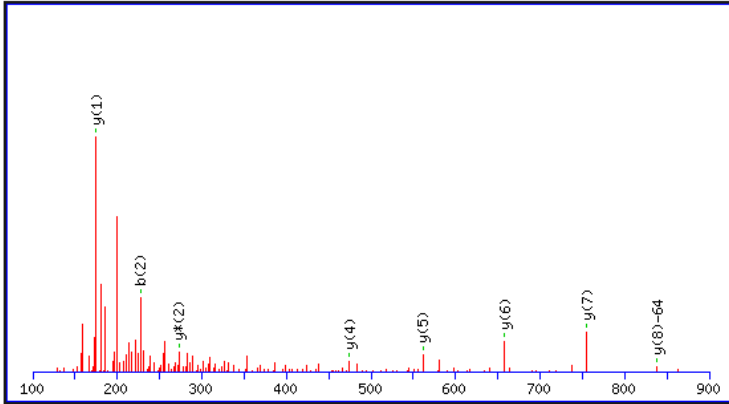

| #         | <b>b</b>      | <b>b<sup>++</sup></b> | <b>b<sup>0</sup></b> | <b>b<sup>0++</sup></b> | Seq.     | <b>y</b>      | <b>y<sup>++</sup></b> | <b>y<sup>*</sup></b> | <b>y<sup>*++</sup></b> | <b>y<sup>0</sup></b> | <b>y<sup>0++</sup></b> | #         |
|-----------|---------------|-----------------------|----------------------|------------------------|----------|---------------|-----------------------|----------------------|------------------------|----------------------|------------------------|-----------|
| <b>1</b>  | 114.09        | 57.55                 |                      |                        | <b>I</b> |               |                       |                      |                        |                      |                        | <b>10</b> |
| <b>2</b>  | <b>227.18</b> | 114.09                |                      |                        | <b>I</b> | 951.53        | 476.27                | 934.50               | 467.75                 | 933.52               | 467.26                 | <b>9</b>  |
| <b>3</b>  | 310.21        | 155.61                |                      |                        | <b>M</b> | <b>838.44</b> | 419.72                | 821.42               | 411.21                 | 820.43               | 410.72                 | <b>8</b>  |
| <b>4</b>  | 407.27        | 204.14                |                      |                        | <b>P</b> | <b>755.40</b> | 378.21                | 738.38               | 369.69                 | 737.39               | 369.20                 | <b>7</b>  |
| <b>5</b>  | 504.32        | 252.66                |                      |                        | <b>P</b> | <b>658.35</b> | 329.68                | 641.33               | 321.17                 | 640.34               | 320.67                 | <b>6</b>  |
| <b>6</b>  | 591.35        | 296.18                | 573.34               | 287.17                 | <b>S</b> | <b>561.30</b> | 281.15                | 544.27               | 272.64                 | 543.29               | 272.15                 | <b>5</b>  |
| <b>7</b>  | 662.39        | 331.70                | 644.38               | 322.69                 | <b>A</b> | <b>474.27</b> | 237.64                | 457.24               | 229.12                 | 456.26               | 228.63                 | <b>4</b>  |
| <b>8</b>  | 775.47        | 388.24                | 757.46               | 379.23                 | <b>L</b> | 403.23        | 202.12                | 386.20               | 193.61                 | 385.22               | 193.11                 | <b>3</b>  |
| <b>9</b>  | 890.50        | 445.75                | 872.49               | 436.75                 | <b>D</b> | 290.15        | 145.58                | <b>273.12</b>        | 137.06                 | 272.14               | 136.57                 | <b>2</b>  |
| <b>10</b> |               |                       |                      |                        | <b>R</b> | <b>175.12</b> | 88.06                 | 158.09               | 79.55                  |                      |                        | <b>1</b>  |

MS/MS Fragmentation of ID1066 **AFEPEILSIGPYHR**

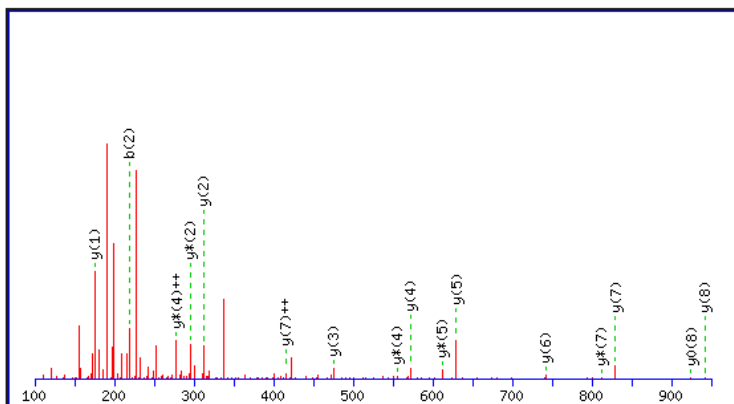

| #         | <b>b</b>      | <b>b<sup>++</sup></b> | <b>b<sup>0</sup></b> | <b>b<sup>0++</sup></b> | Seq.     | <b>y</b>      | <b>y<sup>++</sup></b> | <b>y<sup>*</sup></b> | <b>y<sup>*++</sup></b> | <b>y<sup>0</sup></b> | <b>y<sup>0++</sup></b> | #         |
|-----------|---------------|-----------------------|----------------------|------------------------|----------|---------------|-----------------------|----------------------|------------------------|----------------------|------------------------|-----------|
| <b>1</b>  | 72.04         | 36.53                 |                      |                        | <b>A</b> |               |                       |                      |                        |                      |                        | <b>14</b> |
| <b>2</b>  | <b>219.11</b> | 110.06                |                      |                        | <b>F</b> | 1557.81       | 779.41                | 1540.78              | 770.89                 | 1539.80              | 770.40                 | <b>13</b> |
| <b>3</b>  | 348.16        | 174.58                | 330.14               | 165.58                 | <b>E</b> | 1410.74       | 705.87                | 1393.71              | 697.36                 | 1392.73              | 696.87                 | <b>12</b> |
| <b>4</b>  | 445.21        | 223.11                | 427.20               | 214.10                 | <b>P</b> | 1281.69       | 641.35                | 1264.67              | 632.84                 | 1263.68              | 632.35                 | <b>11</b> |
| <b>5</b>  | 574.25        | 287.63                | 556.24               | 278.62                 | <b>E</b> | 1184.64       | 592.82                | 1167.62              | 584.31                 | 1166.63              | 583.82                 | <b>10</b> |
| <b>6</b>  | 687.33        | 344.17                | 669.32               | 335.17                 | <b>I</b> | 1055.60       | 528.30                | 1038.57              | 519.79                 | 1037.59              | 519.30                 | <b>9</b>  |
| <b>7</b>  | 800.42        | 400.71                | 782.41               | 391.71                 | <b>L</b> | <b>942.52</b> | 471.76                | 925.49               | 463.25                 | <b>924.50</b>        | 462.76                 | <b>8</b>  |
| <b>8</b>  | 887.45        | 444.23                | 869.44               | 435.22                 | <b>S</b> | <b>829.43</b> | <b>415.22</b>         | <b>812.40</b>        | 406.71                 | 811.42               | 406.21                 | <b>7</b>  |
| <b>9</b>  | 1000.53       | 500.77                | 982.52               | 491.77                 | <b>I</b> | <b>742.40</b> | 371.70                | 725.37               | 363.19                 |                      |                        | <b>6</b>  |
| <b>10</b> | 1057.56       | 529.28                | 1039.55              | 520.28                 | <b>G</b> | <b>629.32</b> | 315.16                | <b>612.29</b>        | 306.65                 |                      |                        | <b>5</b>  |
| <b>11</b> | 1154.61       | 577.81                | 1136.60              | 568.80                 | <b>P</b> | <b>572.29</b> | 286.65                | <b>555.27</b>        | <b>278.14</b>          |                      |                        | <b>4</b>  |
| <b>12</b> | 1317.67       | 659.34                | 1299.66              | 650.33                 | <b>Y</b> | <b>475.24</b> | 238.12                | 458.21               | 229.61                 |                      |                        | <b>3</b>  |
| <b>13</b> | 1454.73       | 727.87                | 1436.72              | 718.86                 | <b>H</b> | <b>312.18</b> | 156.59                | <b>295.15</b>        | 148.08                 |                      |                        | <b>2</b>  |
| <b>14</b> |               |                       |                      |                        | <b>R</b> | <b>175.12</b> | 88.06                 | 158.09               | 79.55                  |                      |                        | <b>1</b>  |

MS/MS Fragmentation of ID1068 **AEPDFHLTIR**

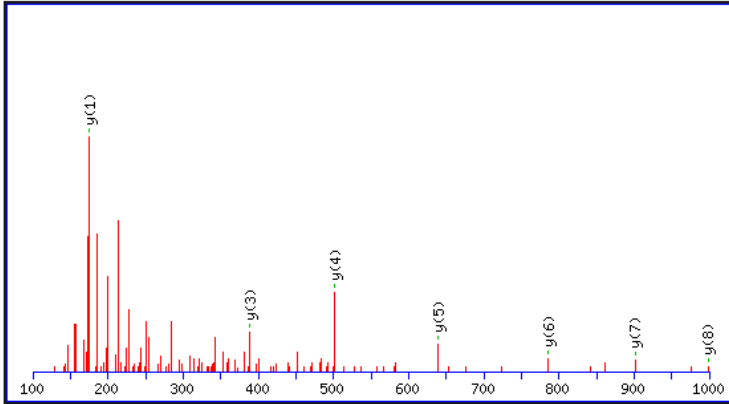

| #         | <b>b</b> | <b>b<sup>++</sup></b> | <b>b<sup>0</sup></b> | <b>b<sup>0++</sup></b> | Seq.     | <b>y</b>      | <b>y<sup>++</sup></b> | <b>y<sup>*</sup></b> | <b>y<sup>*++</sup></b> | <b>y<sup>0</sup></b> | <b>y<sup>0++</sup></b> | #         |
|-----------|----------|-----------------------|----------------------|------------------------|----------|---------------|-----------------------|----------------------|------------------------|----------------------|------------------------|-----------|
| <b>1</b>  | 72.04    | 36.53                 |                      |                        | <b>A</b> |               |                       |                      |                        |                      |                        | <b>10</b> |
| <b>2</b>  | 201.09   | 101.05                | 183.08               | 92.04                  | <b>E</b> | 1127.58       | 564.30                | 1110.56              | 555.78                 | 1109.57              | 555.29                 | <b>9</b>  |
| <b>3</b>  | 298.14   | 149.57                | 280.13               | 140.57                 | <b>P</b> | <b>998.54</b> | 499.77                | 981.52               | 491.26                 | 980.53               | 490.77                 | <b>8</b>  |
| <b>4</b>  | 413.17   | 207.09                | 395.16               | 198.08                 | <b>D</b> | <b>901.49</b> | 451.25                | 884.46               | 442.73                 | 883.48               | 442.24                 | <b>7</b>  |
| <b>5</b>  | 560.24   | 280.62                | 542.22               | 271.62                 | <b>F</b> | <b>786.46</b> | 393.73                | 769.44               | 385.22                 | 768.45               | 384.73                 | <b>6</b>  |
| <b>6</b>  | 697.29   | 349.15                | 679.28               | 340.15                 | <b>H</b> | <b>639.39</b> | 320.20                | 622.37               | 311.69                 | 621.38               | 311.20                 | <b>5</b>  |
| <b>7</b>  | 810.38   | 405.69                | 792.37               | 396.69                 | <b>L</b> | <b>502.33</b> | 251.67                | 485.31               | 243.16                 | 484.32               | 242.67                 | <b>4</b>  |
| <b>8</b>  | 911.43   | 456.22                | 893.42               | 447.21                 | <b>T</b> | <b>389.25</b> | 195.13                | 372.22               | 186.62                 | 371.24               | 186.12                 | <b>3</b>  |
| <b>9</b>  | 1024.51  | 512.76                | 1006.50              | 503.75                 | <b>I</b> | 288.20        | 144.61                | 271.18               | 136.09                 |                      |                        | <b>2</b>  |
| <b>10</b> |          |                       |                      |                        | <b>R</b> | <b>175.12</b> | 88.06                 | 158.09               | 79.55                  |                      |                        | <b>1</b>  |

MS/MS Fragmentation of ID1070 **AGIVESILDALVK**

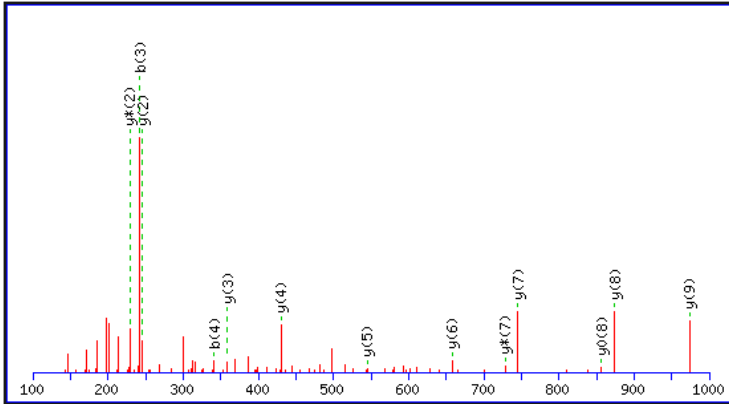

| #         | b             | b <sup>++</sup> | b <sup>0</sup> | b <sup>0++</sup> | Seq.     | y             | y <sup>++</sup> | y <sup>*</sup> | y <sup>*++</sup> | y <sup>0</sup> | y <sup>0++</sup> | #         |
|-----------|---------------|-----------------|----------------|------------------|----------|---------------|-----------------|----------------|------------------|----------------|------------------|-----------|
| <b>1</b>  | 72.04         | 36.53           |                |                  | <b>A</b> |               |                 |                |                  |                |                  | <b>12</b> |
| <b>2</b>  | 129.07        | 65.04           |                |                  | <b>G</b> | 1143.66       | 572.33          | 1126.64        | 563.82           | 1125.65        | 563.33           | <b>11</b> |
| <b>3</b>  | <b>242.15</b> | 121.58          |                |                  | <b>I</b> | 1086.64       | 543.82          | 1069.61        | 535.31           | 1068.63        | 534.82           | <b>10</b> |
| <b>4</b>  | <b>341.22</b> | 171.11          |                |                  | <b>V</b> | <b>973.56</b> | 487.28          | 956.53         | 478.77           | 955.55         | 478.28           | <b>9</b>  |
| <b>5</b>  | 470.26        | 235.63          | 452.25         | 226.63           | <b>E</b> | <b>874.49</b> | 437.75          | 857.46         | 429.23           | <b>856.48</b>  | 428.74           | <b>8</b>  |
| <b>6</b>  | 557.29        | 279.15          | 539.28         | 270.14           | <b>S</b> | <b>745.45</b> | 373.23          | <b>728.42</b>  | 364.71           | 727.43         | 364.22           | <b>7</b>  |
| <b>7</b>  | 670.38        | 335.69          | 652.37         | 326.69           | <b>L</b> | <b>658.41</b> | 329.71          | 641.39         | 321.20           | 640.40         | 320.71           | <b>6</b>  |
| <b>8</b>  | 785.40        | 393.21          | 767.39         | 384.20           | <b>D</b> | <b>545.33</b> | 273.17          | 528.30         | 264.66           | 527.32         | 264.16           | <b>5</b>  |
| <b>9</b>  | 856.44        | 428.72          | 838.43         | 419.72           | <b>A</b> | <b>430.30</b> | 215.65          | 413.28         | 207.14           |                |                  | <b>4</b>  |
| <b>10</b> | 969.53        | 485.27          | 951.51         | 476.26           | <b>L</b> | <b>359.27</b> | 180.14          | 342.24         | 171.62           |                |                  | <b>3</b>  |
| <b>11</b> | 1068.59       | 534.80          | 1050.58        | 525.80           | <b>V</b> | <b>246.18</b> | 123.59          | <b>229.15</b>  | 115.08           |                |                  | <b>2</b>  |
| <b>12</b> |               |                 |                |                  | <b>K</b> | 147.11        | 74.06           | 130.09         | 65.55            |                |                  | <b>1</b>  |

MS/MS Fragmentation of ID1071 **AGIVESLDALVK**

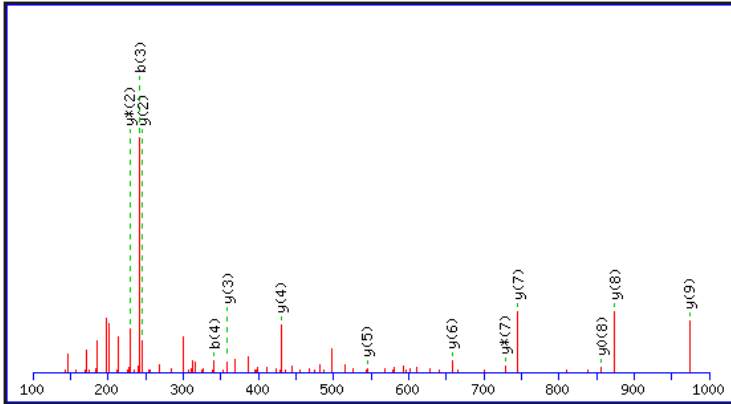

| #         | b             | b <sup>++</sup> | b <sup>0</sup> | b <sup>0++</sup> | Seq.     | y             | y <sup>++</sup> | y <sup>*</sup> | y <sup>*++</sup> | y <sup>0</sup> | y <sup>0++</sup> | #         |
|-----------|---------------|-----------------|----------------|------------------|----------|---------------|-----------------|----------------|------------------|----------------|------------------|-----------|
| <b>1</b>  | 72.04         | 36.53           |                |                  | <b>A</b> |               |                 |                |                  |                |                  | <b>12</b> |
| <b>2</b>  | 129.07        | 65.04           |                |                  | <b>G</b> | 1143.66       | 572.33          | 1126.64        | 563.82           | 1125.65        | 563.33           | <b>11</b> |
| <b>3</b>  | <b>242.15</b> | 121.58          |                |                  | <b>I</b> | 1086.64       | 543.82          | 1069.61        | 535.31           | 1068.63        | 534.82           | <b>10</b> |
| <b>4</b>  | <b>341.22</b> | 171.11          |                |                  | <b>V</b> | <b>973.56</b> | 487.28          | 956.53         | 478.77           | 955.55         | 478.28           | <b>9</b>  |
| <b>5</b>  | 470.26        | 235.63          | 452.25         | 226.63           | <b>E</b> | <b>874.49</b> | 437.75          | 857.46         | 429.23           | <b>856.48</b>  | 428.74           | <b>8</b>  |
| <b>6</b>  | 557.29        | 279.15          | 539.28         | 270.14           | <b>S</b> | <b>745.45</b> | 373.23          | <b>728.42</b>  | 364.71           | 727.43         | 364.22           | <b>7</b>  |
| <b>7</b>  | 670.38        | 335.69          | 652.37         | 326.69           | <b>L</b> | <b>658.41</b> | 329.71          | 641.39         | 321.20           | 640.40         | 320.71           | <b>6</b>  |
| <b>8</b>  | 785.40        | 393.21          | 767.39         | 384.20           | <b>D</b> | <b>545.33</b> | 273.17          | 528.30         | 264.66           | 527.32         | 264.16           | <b>5</b>  |
| <b>9</b>  | 856.44        | 428.72          | 838.43         | 419.72           | <b>A</b> | <b>430.30</b> | 215.65          | 413.28         | 207.14           |                |                  | <b>4</b>  |
| <b>10</b> | 969.53        | 485.27          | 951.51         | 476.26           | <b>L</b> | <b>359.27</b> | 180.14          | 342.24         | 171.62           |                |                  | <b>3</b>  |
| <b>11</b> | 1068.59       | 534.80          | 1050.58        | 525.80           | <b>V</b> | <b>246.18</b> | 123.59          | <b>229.15</b>  | 115.08           |                |                  | <b>2</b>  |
| <b>12</b> |               |                 |                |                  | <b>K</b> | 147.11        | 74.06           | 130.09         | 65.55            |                |                  | <b>1</b>  |

MS/MS Fragmentation of ID1072 **ATPTFFFLR**

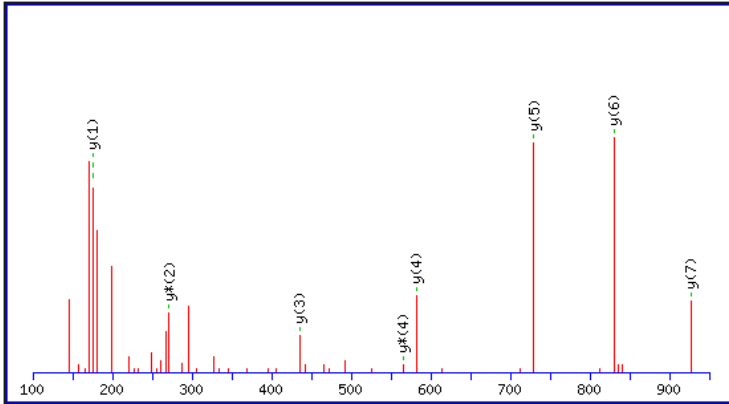

| #        | <b>b</b> | <b>b<sup>++</sup></b> | <b>b<sup>0</sup></b> | <b>b<sup>0++</sup></b> | <b>Seq.</b> | <b>y</b>      | <b>y<sup>++</sup></b> | <b>y<sup>*</sup></b> | <b>y<sup>*++</sup></b> | <b>y<sup>0</sup></b> | <b>y<sup>0++</sup></b> | #        |
|----------|----------|-----------------------|----------------------|------------------------|-------------|---------------|-----------------------|----------------------|------------------------|----------------------|------------------------|----------|
| <b>1</b> | 72.04    | 36.53                 |                      |                        | <b>A</b>    |               |                       |                      |                        |                      |                        | <b>9</b> |
| <b>2</b> | 173.09   | 87.05                 | 155.08               | 78.04                  | <b>T</b>    | 1028.56       | 514.78                | 1011.53              | 506.27                 | 1010.55              | 505.78                 | <b>8</b> |
| <b>3</b> | 270.14   | 135.58                | 252.13               | 126.57                 | <b>P</b>    | <b>927.51</b> | 464.26                | 910.48               | 455.74                 | 909.50               | 455.25                 | <b>7</b> |
| <b>4</b> | 371.19   | 186.10                | 353.18               | 177.09                 | <b>T</b>    | <b>830.46</b> | 415.73                | 813.43               | 407.22                 | 812.45               | 406.73                 | <b>6</b> |
| <b>5</b> | 518.26   | 259.63                | 500.25               | 250.63                 | <b>F</b>    | <b>729.41</b> | 365.21                | 712.38               | 356.69                 |                      |                        | <b>5</b> |
| <b>6</b> | 665.33   | 333.17                | 647.32               | 324.16                 | <b>F</b>    | <b>582.34</b> | 291.67                | <b>565.31</b>        | 283.16                 |                      |                        | <b>4</b> |
| <b>7</b> | 812.40   | 406.70                | 794.39               | 397.70                 | <b>F</b>    | <b>435.27</b> | 218.14                | 418.24               | 209.63                 |                      |                        | <b>3</b> |
| <b>8</b> | 925.48   | 463.24                | 907.47               | 454.24                 | <b>L</b>    | 288.20        | 144.61                | <b>271.18</b>        | 136.09                 |                      |                        | <b>2</b> |
| <b>9</b> |          |                       |                      |                        | <b>R</b>    | <b>175.12</b> | 88.06                 | 158.09               | 79.55                  |                      |                        | <b>1</b> |

MS/MS Fragmentation of ID1073 **VWILYDIFADSR**

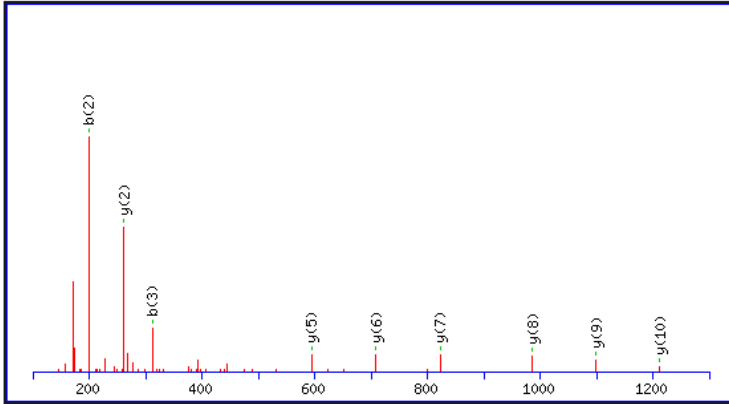

| #         | <b>b</b>      | <b>b<sup>++</sup></b> | <b>b<sup>0</sup></b> | <b>b<sup>0++</sup></b> | Seq.     | <b>y</b>       | <b>y<sup>++</sup></b> | <b>y<sup>*</sup></b> | <b>y<sup>*++</sup></b> | <b>y<sup>0</sup></b> | <b>y<sup>0++</sup></b> | #         |
|-----------|---------------|-----------------------|----------------------|------------------------|----------|----------------|-----------------------|----------------------|------------------------|----------------------|------------------------|-----------|
| <b>1</b>  | 100.08        | 50.54                 |                      |                        | <b>V</b> |                |                       |                      |                        |                      |                        | <b>12</b> |
| <b>2</b>  | <b>199.14</b> | 100.08                |                      |                        | <b>V</b> | 1311.69        | 656.35                | 1294.67              | 647.84                 | 1293.68              | 647.35                 | <b>11</b> |
| <b>3</b>  | <b>312.23</b> | 156.62                |                      |                        | <b>I</b> | <b>1212.63</b> | 606.82                | 1195.60              | 598.30                 | 1194.62              | 597.81                 | <b>10</b> |
| <b>4</b>  | 425.31        | 213.16                |                      |                        | <b>L</b> | <b>1099.54</b> | 550.27                | 1082.52              | 541.76                 | 1081.53              | 541.27                 | <b>9</b>  |
| <b>5</b>  | 588.38        | 294.69                |                      |                        | <b>Y</b> | <b>986.46</b>  | 493.73                | 969.43               | 485.22                 | 968.45               | 484.73                 | <b>8</b>  |
| <b>6</b>  | 703.40        | 352.20                | 685.39               | 343.20                 | <b>D</b> | <b>823.39</b>  | 412.20                | 806.37               | 403.69                 | 805.38               | 403.20                 | <b>7</b>  |
| <b>7</b>  | 816.49        | 408.75                | 798.48               | 399.74                 | <b>I</b> | <b>708.37</b>  | 354.69                | 691.34               | 346.17                 | 690.36               | 345.68                 | <b>6</b>  |
| <b>8</b>  | 963.55        | 482.28                | 945.54               | 473.28                 | <b>F</b> | <b>595.28</b>  | 298.15                | 578.26               | 289.63                 | 577.27               | 289.14                 | <b>5</b>  |
| <b>9</b>  | 1034.59       | 517.80                | 1016.58              | 508.79                 | <b>A</b> | 448.22         | 224.61                | 431.19               | 216.10                 | 430.20               | 215.61                 | <b>4</b>  |
| <b>10</b> | 1149.62       | 575.31                | 1131.61              | 566.31                 | <b>D</b> | 377.18         | 189.09                | 360.15               | 180.58                 | 359.17               | 180.09                 | <b>3</b>  |
| <b>11</b> | 1236.65       | 618.83                | 1218.64              | 609.82                 | <b>S</b> | <b>262.15</b>  | 131.58                | 245.12               | 123.07                 | 244.14               | 122.57                 | <b>2</b>  |
| <b>12</b> |               |                       |                      |                        | <b>R</b> | 175.12         | 88.06                 | 158.09               | 79.55                  |                      |                        | <b>1</b>  |



MS/MS Fragmentation of ID1074 **SPTSDTYVIFGEAK**

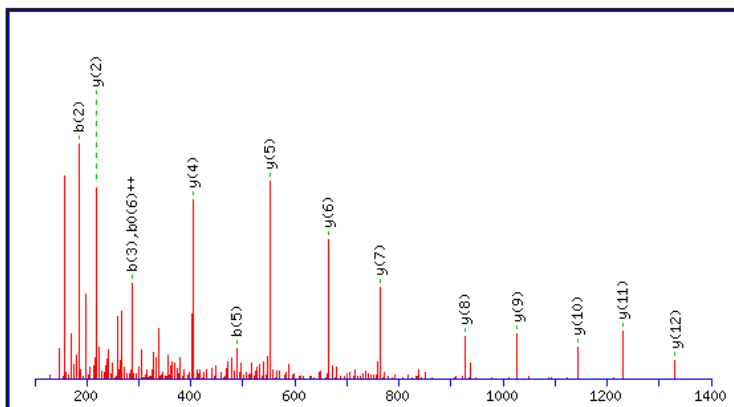

| #  | b       | b <sup>++</sup> | b <sup>0</sup> | b <sup>0++</sup> | Seq. | y       | y <sup>++</sup> | y <sup>*</sup> | y <sup>*++</sup> | y <sup>0</sup> | y <sup>0++</sup> | #  |
|----|---------|-----------------|----------------|------------------|------|---------|-----------------|----------------|------------------|----------------|------------------|----|
| 1  | 88.04   | 44.52           | 70.03          | 35.52            | S    |         |                 |                |                  |                |                  | 14 |
| 2  | 185.09  | 93.05           | 167.08         | 84.04            | P    | 1427.71 | 714.36          | 1410.68        | 705.84           | 1409.69        | 705.35           | 13 |
| 3  | 286.14  | 143.57          | 268.13         | 134.57           | T    | 1330.65 | 665.83          | 1313.63        | 657.32           | 1312.64        | 656.82           | 12 |
| 4  | 373.17  | 187.09          | 355.16         | 178.08           | S    | 1229.60 | 615.31          | 1212.58        | 606.79           | 1211.59        | 606.30           | 11 |
| 5  | 488.20  | 244.60          | 470.19         | 235.60           | D    | 1142.57 | 571.79          | 1125.55        | 563.28           | 1124.56        | 562.78           | 10 |
| 6  | 589.25  | 295.13          | 571.24         | 286.12           | T    | 1027.55 | 514.28          | 1010.52        | 505.76           | 1009.54        | 505.27           | 9  |
| 7  | 752.31  | 376.66          | 734.30         | 367.65           | Y    | 926.50  | 463.75          | 909.47         | 455.24           | 908.49         | 454.75           | 8  |
| 8  | 851.38  | 426.19          | 833.37         | 417.19           | V    | 763.43  | 382.22          | 746.41         | 373.71           | 745.42         | 373.22           | 7  |
| 9  | 964.46  | 482.73          | 946.45         | 473.73           | I    | 664.37  | 332.69          | 647.34         | 324.17           | 646.36         | 323.68           | 6  |
| 10 | 1111.53 | 556.27          | 1093.52        | 547.26           | F    | 551.28  | 276.14          | 534.26         | 267.63           | 533.27         | 267.14           | 5  |
| 11 | 1168.55 | 584.78          | 1150.54        | 575.77           | G    | 404.21  | 202.61          | 387.19         | 194.10           | 386.20         | 193.61           | 4  |
| 12 | 1297.59 | 649.30          | 1279.58        | 640.30           | E    | 347.19  | 174.10          | 330.17         | 165.59           | 329.18         | 165.09           | 3  |
| 13 | 1368.63 | 684.82          | 1350.62        | 675.81           | A    | 218.15  | 109.58          | 201.12         | 101.07           |                |                  | 2  |
| 14 |         |                 |                |                  | K    | 147.11  | 74.06           | 130.09         | 65.55            |                |                  | 1  |

MS/MS Fragmentation of ID1075 **DTWSQLLEFAR**

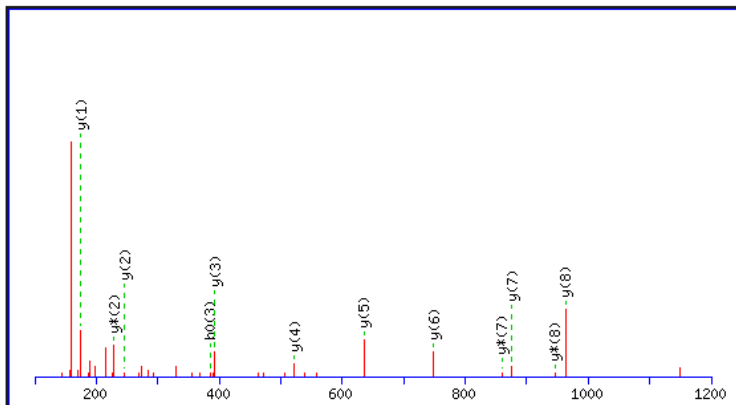

| #         | <b>b</b> | <b>b<sup>++</sup></b> | <b>b<sup>*</sup></b> | <b>b<sup>*++</sup></b> | <b>b<sup>0</sup></b> | <b>b<sup>0++</sup></b> | Seq.     | <b>y</b>      | <b>y<sup>++</sup></b> | <b>y<sup>*</sup></b> | <b>y<sup>*++</sup></b> | <b>y<sup>0</sup></b> | <b>y<sup>0++</sup></b> | #         |
|-----------|----------|-----------------------|----------------------|------------------------|----------------------|------------------------|----------|---------------|-----------------------|----------------------|------------------------|----------------------|------------------------|-----------|
| <b>1</b>  | 116.03   | 58.52                 |                      |                        | 98.02                | 49.52                  | <b>D</b> |               |                       |                      |                        |                      |                        | <b>11</b> |
| <b>2</b>  | 217.08   | 109.04                |                      |                        | 199.07               | 100.04                 | <b>T</b> | 1250.65       | 625.83                | 1233.63              | 617.32                 | 1232.64              | 616.82                 | <b>10</b> |
| <b>3</b>  | 403.16   | 202.08                |                      |                        | <b>385.15</b>        | 193.08                 | <b>W</b> | 1149.61       | 575.31                | 1132.58              | 566.79                 | 1131.59              | 566.30                 | <b>9</b>  |
| <b>4</b>  | 490.19   | 245.60                |                      |                        | 472.18               | 236.59                 | <b>S</b> | <b>963.53</b> | 482.27                | <b>946.50</b>        | 473.75                 | 945.52               | 473.26                 | <b>8</b>  |
| <b>5</b>  | 618.25   | 309.63                | 601.23               | 301.12                 | 600.24               | 300.62                 | <b>Q</b> | <b>876.49</b> | 438.75                | <b>859.47</b>        | 430.24                 | 858.48               | 429.75                 | <b>7</b>  |
| <b>6</b>  | 731.34   | 366.17                | 714.31               | 357.66                 | 713.33               | 357.17                 | <b>L</b> | <b>748.44</b> | 374.72                | 731.41               | 366.21                 | 730.42               | 365.72                 | <b>6</b>  |
| <b>7</b>  | 844.42   | 422.71                | 827.39               | 414.20                 | 826.41               | 413.71                 | <b>L</b> | <b>635.35</b> | 318.18                | 618.32               | 309.67                 | 617.34               | 309.17                 | <b>5</b>  |
| <b>8</b>  | 973.46   | 487.23                | 956.44               | 478.72                 | 955.45               | 478.23                 | <b>E</b> | <b>522.27</b> | 261.64                | 505.24               | 253.12                 | 504.26               | 252.63                 | <b>4</b>  |
| <b>9</b>  | 1120.53  | 560.77                | 1103.50              | 552.26                 | 1102.52              | 551.76                 | <b>F</b> | <b>393.22</b> | 197.12                | 376.20               | 188.60                 |                      |                        | <b>3</b>  |
| <b>10</b> | 1191.57  | 596.29                | 1174.54              | 587.77                 | 1173.56              | 587.28                 | <b>A</b> | <b>246.16</b> | 123.58                | <b>229.13</b>        | 115.07                 |                      |                        | <b>2</b>  |
| <b>11</b> |          |                       |                      |                        |                      |                        | <b>R</b> | <b>175.12</b> | 88.06                 | 158.09               | 79.55                  |                      |                        | <b>1</b>  |

MS/MS Fragmentation of ID1076 **VVDIVDTFR**

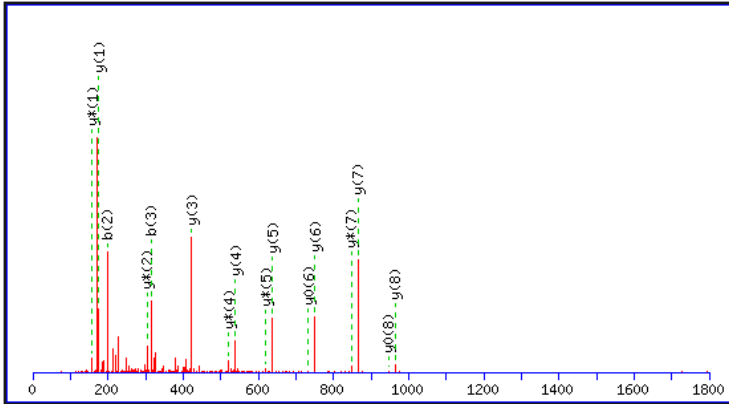

| # | <b>b</b>      | <b>b<sup>++</sup></b> | <b>b<sup>0</sup></b> | <b>b<sup>0++</sup></b> | <b>Seq.</b> | <b>y</b>      | <b>y<sup>++</sup></b> | <b>y*</b>     | <b>y<sup>+++</sup></b> | <b>y<sup>0</sup></b> | <b>y<sup>0++</sup></b> | # |
|---|---------------|-----------------------|----------------------|------------------------|-------------|---------------|-----------------------|---------------|------------------------|----------------------|------------------------|---|
| 1 | 100.08        | 50.54                 |                      |                        | <b>V</b>    |               |                       |               |                        |                      |                        | 9 |
| 2 | <b>199.14</b> | 100.08                |                      |                        | <b>V</b>    | <b>964.51</b> | 482.76                | 947.48        | 474.25                 | <b>946.50</b>        | 473.75                 | 8 |
| 3 | <b>314.17</b> | 157.59                | 296.16               | 148.58                 | <b>D</b>    | <b>865.44</b> | 433.22                | <b>848.41</b> | 424.71                 | 847.43               | 424.22                 | 7 |
| 4 | 427.26        | 214.13                | 409.24               | 205.13                 | <b>I</b>    | <b>750.41</b> | 375.71                | 733.39        | 367.20                 | <b>732.40</b>        | 366.71                 | 6 |
| 5 | 526.32        | 263.67                | 508.31               | 254.66                 | <b>V</b>    | <b>637.33</b> | 319.17                | <b>620.30</b> | 310.66                 | 619.32               | 310.16                 | 5 |
| 6 | 641.35        | 321.18                | 623.34               | 312.17                 | <b>D</b>    | <b>538.26</b> | 269.63                | <b>521.24</b> | 261.12                 | 520.25               | 260.63                 | 4 |
| 7 | 742.40        | 371.70                | 724.39               | 362.70                 | <b>T</b>    | <b>423.24</b> | 212.12                | 406.21        | 203.61                 | 405.22               | 203.12                 | 3 |
| 8 | 889.47        | 445.24                | 871.46               | 436.23                 | <b>F</b>    | 322.19        | 161.60                | <b>305.16</b> | 153.08                 |                      |                        | 2 |
| 9 |               |                       |                      |                        | <b>R</b>    | <b>175.12</b> | 88.06                 | <b>158.09</b> | 79.55                  |                      |                        | 1 |

MS/MS Fragmentation of ID1077 **FNDGITDEQIEK**

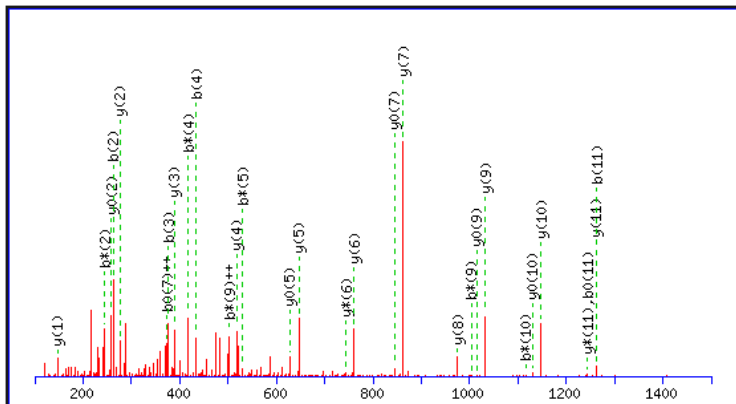

| #  | b              | b <sup>++</sup> | b*             | b <sup>*++</sup> | b <sup>0</sup> | b <sup>0++</sup> | Seq. | y              | y <sup>++</sup> | y*             | y <sup>*++</sup> | y <sup>0</sup> | y <sup>0++</sup> | #  |
|----|----------------|-----------------|----------------|------------------|----------------|------------------|------|----------------|-----------------|----------------|------------------|----------------|------------------|----|
| 1  | 148.08         | 74.54           |                |                  |                |                  | F    |                |                 |                |                  |                |                  | 12 |
| 2  | <b>262.12</b>  | 131.56          | <b>245.09</b>  | 123.05           |                |                  | N    | <b>1261.59</b> | 631.30          | <b>1244.56</b> | 622.79           | 1243.58        | 622.29           | 11 |
| 3  | <b>377.15</b>  | 189.08          | 360.12         | 180.56           | 359.13         | 180.07           | D    | <b>1147.55</b> | 574.28          | 1130.52        | 565.76           | <b>1129.54</b> | 565.27           | 10 |
| 4  | <b>434.17</b>  | 217.59          | <b>417.14</b>  | 209.07           | 416.16         | 208.58           | G    | <b>1032.52</b> | 516.76          | 1015.49        | 508.25           | <b>1014.51</b> | 507.76           | 9  |
| 5  | 547.25         | 274.13          | <b>530.22</b>  | 265.62           | 529.24         | 265.12           | I    | <b>975.50</b>  | 488.25          | 958.47         | 479.74           | 957.49         | 479.25           | 8  |
| 6  | 648.30         | 324.65          | 631.27         | 316.14           | 630.29         | 315.65           | T    | <b>862.42</b>  | 431.71          | 845.39         | 423.20           | <b>844.40</b>  | 422.71           | 7  |
| 7  | 763.33         | 382.17          | 746.30         | 373.65           | 745.32         | <b>373.16</b>    | D    | <b>761.37</b>  | 381.19          | <b>744.34</b>  | 372.67           | 743.36         | 372.18           | 6  |
| 8  | 892.37         | 446.69          | 875.34         | 438.17           | 874.36         | 437.68           | E    | <b>646.34</b>  | 323.67          | 629.31         | 315.16           | <b>628.33</b>  | 314.67           | 5  |
| 9  | 1020.43        | 510.72          | <b>1003.40</b> | <b>502.20</b>    | 1002.42        | 501.71           | Q    | <b>517.30</b>  | 259.15          | 500.27         | 250.64           | 499.29         | 250.15           | 4  |
| 10 | 1133.51        | 567.26          | <b>1116.48</b> | 558.75           | 1115.50        | 558.25           | I    | <b>389.24</b>  | 195.12          | 372.21         | 186.61           | 371.23         | 186.12           | 3  |
| 11 | <b>1262.55</b> | 631.78          | 1245.53        | 623.27           | <b>1244.54</b> | 622.78           | E    | <b>276.16</b>  | 138.58          | 259.13         | 130.07           | <b>258.14</b>  | 129.58           | 2  |
| 12 |                |                 |                |                  |                |                  | K    | <b>147.11</b>  | 74.06           | 130.09         | 65.55            |                |                  | 1  |

MS/MS Fragmentation of ID1078 **MENLMGLLR**

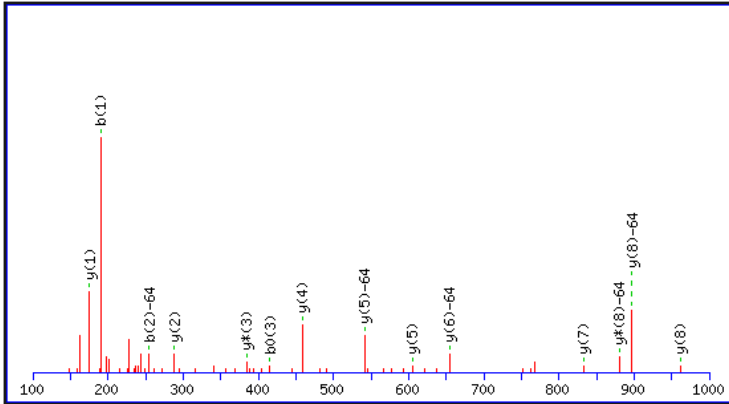

| #        | <b>b</b>      | <b>b<sup>++</sup></b> | <b>b<sup>*</sup></b> | <b>b<sup>*++</sup></b> | <b>b<sup>0</sup></b> | <b>b<sup>0++</sup></b> | Seq.     | <b>y</b>      | <b>y<sup>++</sup></b> | <b>y<sup>*</sup></b> | <b>y<sup>*++</sup></b> | <b>y<sup>0</sup></b> | <b>y<sup>0++</sup></b> | #        |
|----------|---------------|-----------------------|----------------------|------------------------|----------------------|------------------------|----------|---------------|-----------------------|----------------------|------------------------|----------------------|------------------------|----------|
| <b>1</b> | 126.06        | 63.53                 |                      |                        |                      |                        | <b>M</b> |               |                       |                      |                        |                      |                        | <b>9</b> |
| <b>2</b> | <b>255.10</b> | 128.05                |                      |                        | 237.09               | 119.05                 | <b>E</b> | <b>897.52</b> | 449.26                | <b>880.49</b>        | 440.75                 | 879.50               | 440.26                 | <b>8</b> |
| <b>3</b> | 369.14        | 185.07                | 352.11               | 176.56                 | 351.13               | 176.07                 | <b>N</b> | 768.47        | 384.74                | 751.45               | 376.23                 |                      |                        | <b>7</b> |
| <b>4</b> | 482.22        | 241.62                | 465.20               | 233.10                 | 464.21               | 232.61                 | <b>L</b> | <b>654.43</b> | 327.72                | 637.40               | 319.21                 |                      |                        | <b>6</b> |
| <b>5</b> | 565.26        | 283.13                | 548.24               | 274.62                 | 547.25               | 274.13                 | <b>M</b> | <b>541.35</b> | 271.18                | 524.32               | 262.66                 |                      |                        | <b>5</b> |
| <b>6</b> | 622.28        | 311.65                | 605.26               | 303.13                 | 604.27               | 302.64                 | <b>G</b> | <b>458.31</b> | 229.66                | 441.28               | 221.14                 |                      |                        | <b>4</b> |
| <b>7</b> | 735.37        | 368.19                | 718.34               | 359.67                 | 717.36               | 359.18                 | <b>L</b> | 401.29        | 201.15                | <b>384.26</b>        | 192.63                 |                      |                        | <b>3</b> |
| <b>8</b> | 848.45        | 424.73                | 831.42               | 416.22                 | 830.44               | 415.72                 | <b>L</b> | <b>288.20</b> | 144.61                | 271.18               | 136.09                 |                      |                        | <b>2</b> |
| <b>9</b> |               |                       |                      |                        |                      |                        | <b>R</b> | <b>175.12</b> | 88.06                 | 158.09               | 79.55                  |                      |                        | <b>1</b> |

MS/MS Fragmentation of ID1080 **LYDGSDIGPFR**

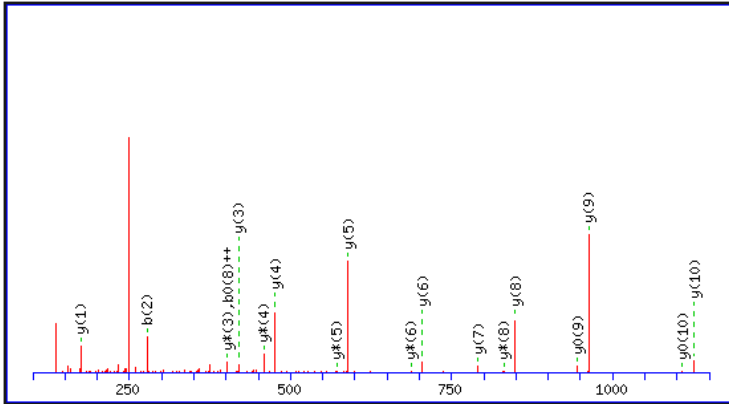

| #         | <b>b</b>      | <b>b<sup>++</sup></b> | <b>b<sup>0</sup></b> | <b>b<sup>0++</sup></b> | Seq.     | <b>y</b>       | <b>y<sup>++</sup></b> | <b>y<sup>*</sup></b> | <b>y<sup>*++</sup></b> | <b>y<sup>0</sup></b> | <b>y<sup>0++</sup></b> | #         |
|-----------|---------------|-----------------------|----------------------|------------------------|----------|----------------|-----------------------|----------------------|------------------------|----------------------|------------------------|-----------|
| <b>1</b>  | 114.09        | 57.55                 |                      |                        | <b>L</b> |                |                       |                      |                        |                      |                        | <b>11</b> |
| <b>2</b>  | <b>277.15</b> | 139.08                |                      |                        | <b>Y</b> | <b>1126.52</b> | 563.76                | 1109.49              | 555.25                 | <b>1108.51</b>       | 554.76                 | <b>10</b> |
| <b>3</b>  | 392.18        | 196.59                | 374.17               | 187.59                 | <b>D</b> | <b>963.45</b>  | 482.23                | 946.43               | 473.72                 | <b>945.44</b>        | 473.22                 | <b>9</b>  |
| <b>4</b>  | 449.20        | 225.11                | 431.19               | 216.10                 | <b>G</b> | <b>848.43</b>  | 424.72                | <b>831.40</b>        | 416.20                 | 830.42               | 415.71                 | <b>8</b>  |
| <b>5</b>  | 536.24        | 268.62                | 518.22               | 259.62                 | <b>S</b> | <b>791.40</b>  | 396.21                | 774.38               | 387.69                 | 773.39               | 387.20                 | <b>7</b>  |
| <b>6</b>  | 651.26        | 326.13                | 633.25               | 317.13                 | <b>D</b> | <b>704.37</b>  | 352.69                | <b>687.35</b>        | 344.18                 | 686.36               | 343.68                 | <b>6</b>  |
| <b>7</b>  | 764.35        | 382.68                | 746.34               | 373.67                 | <b>I</b> | <b>589.35</b>  | 295.18                | <b>572.32</b>        | 286.66                 |                      |                        | <b>5</b>  |
| <b>8</b>  | 821.37        | 411.19                | 803.36               | <b>402.18</b>          | <b>G</b> | <b>476.26</b>  | 238.63                | <b>459.24</b>        | 230.12                 |                      |                        | <b>4</b>  |
| <b>9</b>  | 918.42        | 459.71                | 900.41               | 450.71                 | <b>P</b> | <b>419.24</b>  | 210.12                | <b>402.21</b>        | 201.61                 |                      |                        | <b>3</b>  |
| <b>10</b> | 1065.49       | 533.25                | 1047.48              | 524.24                 | <b>F</b> | 322.19         | 161.60                | 305.16               | 153.08                 |                      |                        | <b>2</b>  |
| <b>11</b> |               |                       |                      |                        | <b>R</b> | <b>175.12</b>  | 88.06                 | 158.09               | 79.55                  |                      |                        | <b>1</b>  |

MS/MS Fragmentation of ID1081 **LYDGSDIGPFR**



| #         | <b>b</b>      | <b>b<sup>++</sup></b> | <b>b<sup>0</sup></b> | <b>b<sup>0++</sup></b> | Seq.     | <b>y</b>       | <b>y<sup>++</sup></b> | <b>y<sup>*</sup></b> | <b>y<sup>*++</sup></b> | <b>y<sup>0</sup></b> | <b>y<sup>0++</sup></b> | #         |
|-----------|---------------|-----------------------|----------------------|------------------------|----------|----------------|-----------------------|----------------------|------------------------|----------------------|------------------------|-----------|
| <b>1</b>  | 114.09        | 57.55                 |                      |                        | <b>L</b> |                |                       |                      |                        |                      |                        | <b>11</b> |
| <b>2</b>  | <b>277.15</b> | 139.08                |                      |                        | <b>Y</b> | <b>1126.52</b> | 563.76                | 1109.49              | 555.25                 | <b>1108.51</b>       | 554.76                 | <b>10</b> |
| <b>3</b>  | 392.18        | 196.59                | 374.17               | 187.59                 | <b>D</b> | <b>963.45</b>  | 482.23                | 946.43               | 473.72                 | <b>945.44</b>        | 473.22                 | <b>9</b>  |
| <b>4</b>  | 449.20        | 225.11                | 431.19               | 216.10                 | <b>G</b> | <b>848.43</b>  | 424.72                | <b>831.40</b>        | 416.20                 | 830.42               | 415.71                 | <b>8</b>  |
| <b>5</b>  | 536.24        | 268.62                | 518.22               | 259.62                 | <b>S</b> | <b>791.40</b>  | 396.21                | 774.38               | 387.69                 | 773.39               | 387.20                 | <b>7</b>  |
| <b>6</b>  | 651.26        | 326.13                | 633.25               | 317.13                 | <b>D</b> | <b>704.37</b>  | 352.69                | <b>687.35</b>        | 344.18                 | 686.36               | 343.68                 | <b>6</b>  |
| <b>7</b>  | 764.35        | 382.68                | 746.34               | 373.67                 | <b>I</b> | <b>589.35</b>  | 295.18                | <b>572.32</b>        | 286.66                 |                      |                        | <b>5</b>  |
| <b>8</b>  | 821.37        | 411.19                | 803.36               | <b>402.18</b>          | <b>G</b> | <b>476.26</b>  | 238.63                | <b>459.24</b>        | 230.12                 |                      |                        | <b>4</b>  |
| <b>9</b>  | 918.42        | 459.71                | 900.41               | 450.71                 | <b>P</b> | <b>419.24</b>  | 210.12                | <b>402.21</b>        | 201.61                 |                      |                        | <b>3</b>  |
| <b>10</b> | 1065.49       | 533.25                | 1047.48              | 524.24                 | <b>F</b> | 322.19         | 161.60                | 305.16               | 153.08                 |                      |                        | <b>2</b>  |
| <b>11</b> |               |                       |                      |                        | <b>R</b> | <b>175.12</b>  | 88.06                 | 158.09               | 79.55                  |                      |                        | <b>1</b>  |

MS/MS Fragmentation of ID1082 **SPDDLQLVVK**

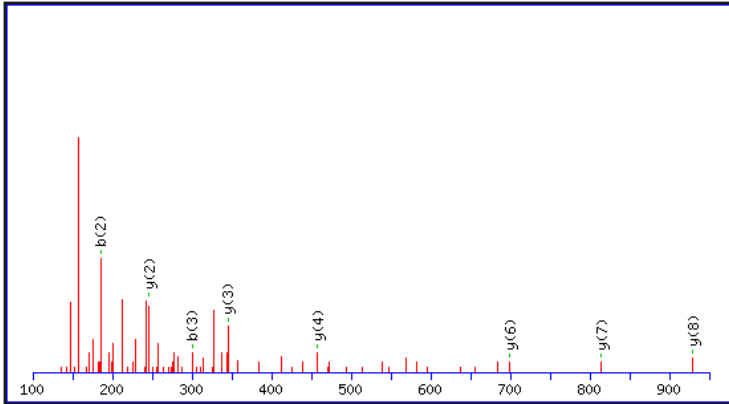

| #         | <b>b</b>      | <b>b<sup>++</sup></b> | <b>b<sup>*</sup></b> | <b>b<sup>+++</sup></b> | <b>b<sup>0</sup></b> | <b>b<sup>0++</sup></b> | Seq.     | <b>y</b>      | <b>y<sup>++</sup></b> | <b>y<sup>*</sup></b> | <b>y<sup>+++</sup></b> | <b>y<sup>0</sup></b> | <b>y<sup>0++</sup></b> | #         |
|-----------|---------------|-----------------------|----------------------|------------------------|----------------------|------------------------|----------|---------------|-----------------------|----------------------|------------------------|----------------------|------------------------|-----------|
| <b>1</b>  | 88.04         | 44.52                 |                      |                        | 70.03                | 35.52                  | <b>S</b> |               |                       |                      |                        |                      |                        | <b>10</b> |
| <b>2</b>  | <b>185.09</b> | 93.05                 |                      |                        | 167.08               | 84.04                  | <b>P</b> | 1026.58       | 513.80                | 1009.56              | 505.28                 | 1008.57              | 504.79                 | <b>9</b>  |
| <b>3</b>  | <b>300.12</b> | 150.56                |                      |                        | 282.11               | 141.56                 | <b>D</b> | <b>929.53</b> | 465.27                | 912.50               | 456.76                 | 911.52               | 456.26                 | <b>8</b>  |
| <b>4</b>  | 415.15        | 208.08                |                      |                        | 397.14               | 199.07                 | <b>D</b> | <b>814.50</b> | 407.76                | 797.48               | 399.24                 | 796.49               | 398.75                 | <b>7</b>  |
| <b>5</b>  | 528.23        | 264.62                |                      |                        | 510.22               | 255.61                 | <b>L</b> | <b>699.48</b> | 350.24                | 682.45               | 341.73                 |                      |                        | <b>6</b>  |
| <b>6</b>  | 656.29        | 328.65                | 639.26               | 320.13                 | 638.28               | 319.64                 | <b>Q</b> | 586.39        | 293.70                | 569.37               | 285.19                 |                      |                        | <b>5</b>  |
| <b>7</b>  | 769.37        | 385.19                | 752.35               | 376.68                 | 751.36               | 376.18                 | <b>L</b> | <b>458.33</b> | 229.67                | 441.31               | 221.16                 |                      |                        | <b>4</b>  |
| <b>8</b>  | 868.44        | 434.72                | 851.41               | 426.21                 | 850.43               | 425.72                 | <b>V</b> | <b>345.25</b> | 173.13                | 328.22               | 164.62                 |                      |                        | <b>3</b>  |
| <b>9</b>  | 967.51        | 484.26                | 950.48               | 475.75                 | 949.50               | 475.25                 | <b>V</b> | <b>246.18</b> | 123.59                | 229.15               | 115.08                 |                      |                        | <b>2</b>  |
| <b>10</b> |               |                       |                      |                        |                      |                        | <b>K</b> | 147.11        | 74.06                 | 130.09               | 65.55                  |                      |                        | <b>1</b>  |



MS/MS Fragmentation of ID1085 **EFGDWLVEIR**

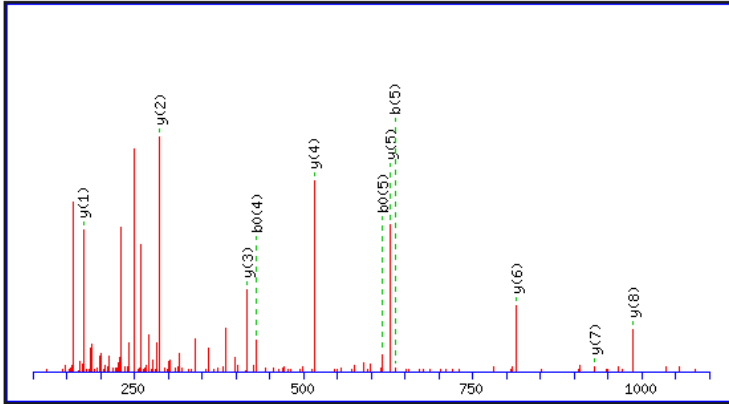

| #         | <b>b</b>      | <b>b<sup>++</sup></b> | <b>b<sup>0</sup></b> | <b>b<sup>0++</sup></b> | Seq.     | <b>y</b>      | <b>y<sup>++</sup></b> | <b>y<sup>*</sup></b> | <b>y<sup>*++</sup></b> | <b>y<sup>0</sup></b> | <b>y<sup>0++</sup></b> | #         |
|-----------|---------------|-----------------------|----------------------|------------------------|----------|---------------|-----------------------|----------------------|------------------------|----------------------|------------------------|-----------|
| <b>1</b>  | 130.05        | 65.53                 | 112.04               | 56.52                  | <b>E</b> |               |                       |                      |                        |                      |                        | <b>10</b> |
| <b>2</b>  | 277.12        | 139.06                | 259.11               | 130.06                 | <b>F</b> | 1134.59       | 567.80                | 1117.57              | 559.29                 | 1116.58              | 558.80                 | <b>9</b>  |
| <b>3</b>  | 334.14        | 167.57                | 316.13               | 158.57                 | <b>G</b> | <b>987.53</b> | 494.27                | 970.50               | 485.75                 | 969.52               | 485.26                 | <b>8</b>  |
| <b>4</b>  | 449.17        | 225.09                | <b>431.16</b>        | 216.08                 | <b>D</b> | <b>930.50</b> | 465.76                | 913.48               | 457.24                 | 912.49               | 456.75                 | <b>7</b>  |
| <b>5</b>  | <b>635.25</b> | 318.13                | <b>617.24</b>        | 309.12                 | <b>W</b> | <b>815.48</b> | 408.24                | 798.45               | 399.73                 | 797.47               | 399.24                 | <b>6</b>  |
| <b>6</b>  | 748.33        | 374.67                | 730.32               | 365.66                 | <b>L</b> | <b>629.40</b> | 315.20                | 612.37               | 306.69                 | 611.39               | 306.20                 | <b>5</b>  |
| <b>7</b>  | 847.40        | 424.20                | 829.39               | 415.20                 | <b>V</b> | <b>516.31</b> | 258.66                | 499.29               | 250.15                 | 498.30               | 249.66                 | <b>4</b>  |
| <b>8</b>  | 976.44        | 488.72                | 958.43               | 479.72                 | <b>E</b> | <b>417.25</b> | 209.13                | 400.22               | 200.61                 | 399.24               | 200.12                 | <b>3</b>  |
| <b>9</b>  | 1089.53       | 545.27                | 1071.51              | 536.26                 | <b>I</b> | <b>288.20</b> | 144.61                | 271.18               | 136.09                 |                      |                        | <b>2</b>  |
| <b>10</b> |               |                       |                      |                        | <b>R</b> | <b>175.12</b> | 88.06                 | 158.09               | 79.55                  |                      |                        | <b>1</b>  |

MS/MS Fragmentation of ID1086 **IGKLDEAR**

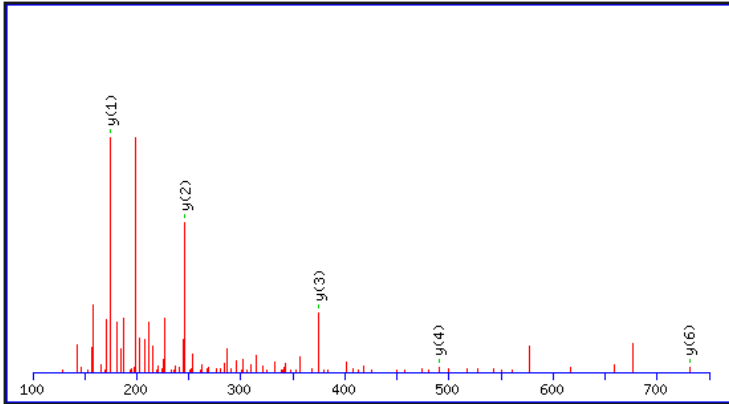

| #        | <b>b</b> | <b>b<sup>++</sup></b> | <b>b<sup>*</sup></b> | <b>b<sup>*++</sup></b> | <b>b<sup>0</sup></b> | <b>b<sup>0++</sup></b> | Seq.     | <b>y</b>      | <b>y<sup>++</sup></b> | <b>y<sup>*</sup></b> | <b>y<sup>*++</sup></b> | <b>y<sup>0</sup></b> | <b>y<sup>0++</sup></b> | #        |
|----------|----------|-----------------------|----------------------|------------------------|----------------------|------------------------|----------|---------------|-----------------------|----------------------|------------------------|----------------------|------------------------|----------|
| <b>1</b> | 114.09   | 57.55                 |                      |                        |                      |                        | <b>I</b> |               |                       |                      |                        |                      |                        | <b>8</b> |
| <b>2</b> | 171.11   | 86.06                 |                      |                        |                      |                        | <b>G</b> | 788.43        | 394.72                | 771.40               | 386.20                 | 770.42               | 385.71                 | <b>7</b> |
| <b>3</b> | 299.21   | 150.11                | 282.18               | 141.59                 |                      |                        | <b>K</b> | <b>731.40</b> | 366.21                | 714.38               | 357.69                 | 713.39               | 357.20                 | <b>6</b> |
| <b>4</b> | 412.29   | 206.65                | 395.27               | 198.14                 |                      |                        | <b>L</b> | 603.31        | 302.16                | 586.28               | 293.65                 | 585.30               | 293.15                 | <b>5</b> |
| <b>5</b> | 527.32   | 264.16                | 510.29               | 255.65                 | 509.31               | 255.16                 | <b>D</b> | <b>490.23</b> | 245.62                | 473.20               | 237.10                 | 472.22               | 236.61                 | <b>4</b> |
| <b>6</b> | 656.36   | 328.68                | 639.33               | 320.17                 | 638.35               | 319.68                 | <b>E</b> | <b>375.20</b> | 188.10                | 358.17               | 179.59                 | 357.19               | 179.10                 | <b>3</b> |
| <b>7</b> | 727.40   | 364.20                | 710.37               | 355.69                 | 709.39               | 355.20                 | <b>A</b> | <b>246.16</b> | 123.58                | 229.13               | 115.07                 |                      |                        | <b>2</b> |
| <b>8</b> |          |                       |                      |                        |                      |                        | <b>R</b> | <b>175.12</b> | 88.06                 | 158.09               | 79.55                  |                      |                        | <b>1</b> |

MS/MS Fragmentation of ID1087 **HLEGGTISR**

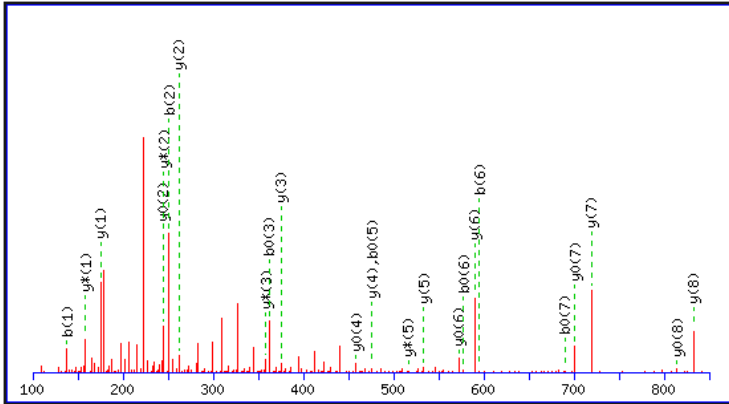

| # | b             | b <sup>++</sup> | b <sup>0</sup> | b <sup>0++</sup> | Seq.     | y             | y <sup>++</sup> | y*            | y <sup>+++</sup> | y <sup>0</sup> | y <sup>0++</sup> | #        |
|---|---------------|-----------------|----------------|------------------|----------|---------------|-----------------|---------------|------------------|----------------|------------------|----------|
| 1 | <b>138.07</b> | 69.54           |                |                  | <b>H</b> |               |                 |               |                  |                |                  | <b>9</b> |
| 2 | <b>251.15</b> | 126.08          |                |                  | <b>L</b> | <b>832.45</b> | 416.73          | 815.43        | 408.22           | <b>814.44</b>  | 407.72           | <b>8</b> |
| 3 | 380.19        | 190.60          | <b>362.18</b>  | 181.59           | <b>E</b> | <b>719.37</b> | 360.19          | 702.34        | 351.67           | <b>701.36</b>  | 351.18           | <b>7</b> |
| 4 | 437.21        | 219.11          | 419.20         | 210.11           | <b>G</b> | <b>590.33</b> | 295.67          | 573.30        | 287.15           | <b>572.32</b>  | 286.66           | <b>6</b> |
| 5 | 494.24        | 247.62          | <b>476.23</b>  | 238.62           | <b>G</b> | <b>533.30</b> | 267.16          | <b>516.28</b> | 258.64           | 515.29         | 258.15           | <b>5</b> |
| 6 | <b>595.28</b> | 298.15          | <b>577.27</b>  | 289.14           | <b>T</b> | <b>476.28</b> | 238.64          | 459.26        | 230.13           | <b>458.27</b>  | 229.64           | <b>4</b> |
| 7 | 708.37        | 354.69          | <b>690.36</b>  | 345.68           | <b>I</b> | <b>375.24</b> | 188.12          | <b>358.21</b> | 179.61           | 357.22         | 179.12           | <b>3</b> |
| 8 | 795.40        | 398.20          | 777.39         | 389.20           | <b>S</b> | <b>262.15</b> | 131.58          | <b>245.12</b> | 123.07           | <b>244.14</b>  | 122.57           | <b>2</b> |
| 9 |               |                 |                |                  | <b>R</b> | <b>175.12</b> | 88.06           | <b>158.09</b> | 79.55            |                |                  | <b>1</b> |

MS/MS Fragmentation of ID1094 **ARPHLVESTSGSR**

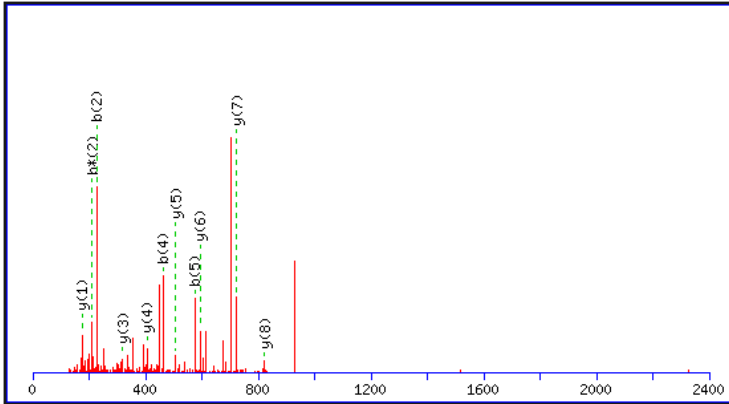

| #         | b             | b <sup>++</sup> | b*            | b <sup>*++</sup> | b <sup>0</sup> | b <sup>0++</sup> | Seq.     | y             | y <sup>++</sup> | y*      | y <sup>*++</sup> | y <sup>0</sup> | y <sup>0++</sup> | #         |
|-----------|---------------|-----------------|---------------|------------------|----------------|------------------|----------|---------------|-----------------|---------|------------------|----------------|------------------|-----------|
| <b>1</b>  | 72.04         | 36.53           |               |                  |                |                  | <b>A</b> |               |                 |         |                  |                |                  | <b>13</b> |
| <b>2</b>  | <b>228.15</b> | 114.58          | <b>211.12</b> | 106.06           |                |                  | <b>R</b> | 1325.69       | 663.35          | 1308.67 | 654.84           | 1307.68        | 654.34           | <b>12</b> |
| <b>3</b>  | 325.20        | 163.10          | 308.17        | 154.59           |                |                  | <b>P</b> | 1169.59       | 585.30          | 1152.56 | 576.79           | 1151.58        | 576.29           | <b>11</b> |
| <b>4</b>  | <b>462.26</b> | 231.63          | 445.23        | 223.12           |                |                  | <b>H</b> | 1072.54       | 536.77          | 1055.51 | 528.26           | 1054.53        | 527.77           | <b>10</b> |
| <b>5</b>  | <b>575.34</b> | 288.17          | 558.31        | 279.66           |                |                  | <b>L</b> | 935.48        | 468.24          | 918.45  | 459.73           | 917.47         | 459.24           | <b>9</b>  |
| <b>6</b>  | 674.41        | 337.71          | 657.38        | 329.20           |                |                  | <b>V</b> | <b>822.40</b> | 411.70          | 805.37  | 403.19           | 804.38         | 402.70           | <b>8</b>  |
| <b>7</b>  | 803.45        | 402.23          | 786.43        | 393.72           | 785.44         | 393.22           | <b>E</b> | <b>723.33</b> | 362.17          | 706.30  | 353.65           | 705.32         | 353.16           | <b>7</b>  |
| <b>8</b>  | 890.48        | 445.75          | 873.46        | 437.23           | 872.47         | 436.74           | <b>S</b> | <b>594.28</b> | 297.65          | 577.26  | 289.13           | 576.27         | 288.64           | <b>6</b>  |
| <b>9</b>  | 991.53        | 496.27          | 974.51        | 487.76           | 973.52         | 487.26           | <b>T</b> | <b>507.25</b> | 254.13          | 490.23  | 245.62           | 489.24         | 245.12           | <b>5</b>  |
| <b>10</b> | 1078.56       | 539.79          | 1061.54       | 531.27           | 1060.55        | 530.78           | <b>S</b> | <b>406.20</b> | 203.61          | 389.18  | 195.09           | 388.19         | 194.60           | <b>4</b>  |
| <b>11</b> | 1135.59       | 568.30          | 1118.56       | 559.78           | 1117.57        | 559.29           | <b>G</b> | <b>319.17</b> | 160.09          | 302.15  | 151.58           | 301.16         | 151.08           | <b>3</b>  |
| <b>12</b> | 1222.62       | 611.81          | 1205.59       | 603.30           | 1204.61        | 602.81           | <b>S</b> | 262.15        | 131.58          | 245.12  | 123.07           | 244.14         | 122.57           | <b>2</b>  |
| <b>13</b> |               |                 |               |                  |                |                  | <b>R</b> | <b>175.12</b> | 88.06           | 158.09  | 79.55            |                |                  | <b>1</b>  |

MS/MS Fragmentation of ID1095 **ATTETVDALR**

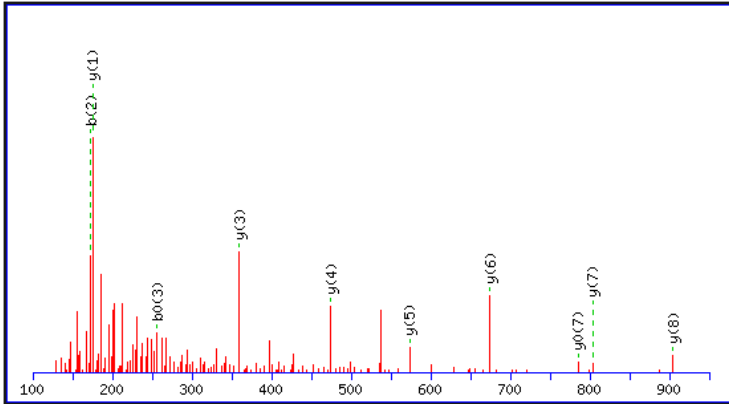

| #         | b             | b <sup>++</sup> | b <sup>0</sup> | b <sup>0++</sup> | Seq.     | y             | y <sup>++</sup> | y <sup>*</sup> | y <sup>*++</sup> | y <sup>0</sup> | y <sup>0++</sup> | #         |
|-----------|---------------|-----------------|----------------|------------------|----------|---------------|-----------------|----------------|------------------|----------------|------------------|-----------|
| <b>1</b>  | 72.04         | 36.53           |                |                  | <b>A</b> |               |                 |                |                  |                |                  | <b>10</b> |
| <b>2</b>  | <b>173.09</b> | 87.05           | 155.08         | 78.04            | <b>T</b> | 1005.52       | 503.26          | 988.49         | 494.75           | 987.51         | 494.26           | <b>9</b>  |
| <b>3</b>  | 274.14        | 137.57          | <b>256.13</b>  | 128.57           | <b>T</b> | <b>904.47</b> | 452.74          | 887.45         | 444.23           | 886.46         | 443.74           | <b>8</b>  |
| <b>4</b>  | 403.18        | 202.09          | 385.17         | 193.09           | <b>E</b> | <b>803.43</b> | 402.22          | 786.40         | 393.70           | <b>785.42</b>  | 393.21           | <b>7</b>  |
| <b>5</b>  | 504.23        | 252.62          | 486.22         | 243.61           | <b>T</b> | <b>674.38</b> | 337.70          | 657.36         | 329.18           | 656.37         | 328.69           | <b>6</b>  |
| <b>6</b>  | 603.30        | 302.15          | 585.29         | 293.15           | <b>V</b> | <b>573.34</b> | 287.17          | 556.31         | 278.66           | 555.32         | 278.17           | <b>5</b>  |
| <b>7</b>  | 718.33        | 359.67          | 700.31         | 350.66           | <b>D</b> | <b>474.27</b> | 237.64          | 457.24         | 229.12           | 456.26         | 228.63           | <b>4</b>  |
| <b>8</b>  | 789.36        | 395.18          | 771.35         | 386.18           | <b>A</b> | <b>359.24</b> | 180.12          | 342.21         | 171.61           |                |                  | <b>3</b>  |
| <b>9</b>  | 902.45        | 451.73          | 884.44         | 442.72           | <b>L</b> | 288.20        | 144.61          | 271.18         | 136.09           |                |                  | <b>2</b>  |
| <b>10</b> |               |                 |                |                  | <b>R</b> | <b>175.12</b> | 88.06           | 158.09         | 79.55            |                |                  | <b>1</b>  |

MS/MS Fragmentation of ID1098 **ATKIVDQR**

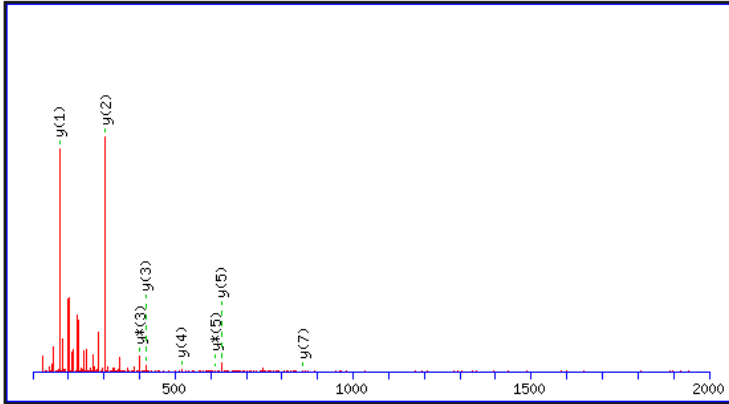

| #        | <b>b</b> | <b>b<sup>++</sup></b> | <b>b<sup>*</sup></b> | <b>b<sup>*++</sup></b> | <b>b<sup>0</sup></b> | <b>b<sup>0++</sup></b> | Seq.     | <b>y</b>      | <b>y<sup>++</sup></b> | <b>y<sup>*</sup></b> | <b>y<sup>*++</sup></b> | <b>y<sup>0</sup></b> | <b>y<sup>0++</sup></b> | #        |
|----------|----------|-----------------------|----------------------|------------------------|----------------------|------------------------|----------|---------------|-----------------------|----------------------|------------------------|----------------------|------------------------|----------|
| <b>1</b> | 114.05   | 57.53                 |                      |                        |                      |                        | <b>A</b> |               |                       |                      |                        |                      |                        | <b>8</b> |
| <b>2</b> | 215.10   | 108.05                |                      |                        | 197.09               | 99.05                  | <b>T</b> | <b>859.50</b> | 430.25                | 842.47               | 421.74                 | 841.49               | 421.25                 | <b>7</b> |
| <b>3</b> | 343.20   | 172.10                | 326.17               | 163.59                 | 325.19               | 163.10                 | <b>K</b> | 758.45        | 379.73                | 741.43               | 371.22                 | 740.44               | 370.72                 | <b>6</b> |
| <b>4</b> | 456.28   | 228.64                | 439.26               | 220.13                 | 438.27               | 219.64                 | <b>I</b> | <b>630.36</b> | 315.68                | <b>613.33</b>        | 307.17                 | 612.35               | 306.68                 | <b>5</b> |
| <b>5</b> | 555.35   | 278.18                | 538.32               | 269.67                 | 537.34               | 269.17                 | <b>V</b> | <b>517.27</b> | 259.14                | 500.25               | 250.63                 | 499.26               | 250.13                 | <b>4</b> |
| <b>6</b> | 670.38   | 335.69                | 653.35               | 327.18                 | 652.37               | 326.69                 | <b>D</b> | <b>418.20</b> | 209.61                | <b>401.18</b>        | 201.09                 | 400.19               | 200.60                 | <b>3</b> |
| <b>7</b> | 798.44   | 399.72                | 781.41               | 391.21                 | 780.43               | 390.72                 | <b>Q</b> | <b>303.18</b> | 152.09                | 286.15               | 143.58                 |                      |                        | <b>2</b> |
| <b>8</b> |          |                       |                      |                        |                      |                        | <b>R</b> | <b>175.12</b> | 88.06                 | 158.09               | 79.55                  |                      |                        | <b>1</b> |

MS/MS Fragmentation of ID1099 **FSFLDYAGK**

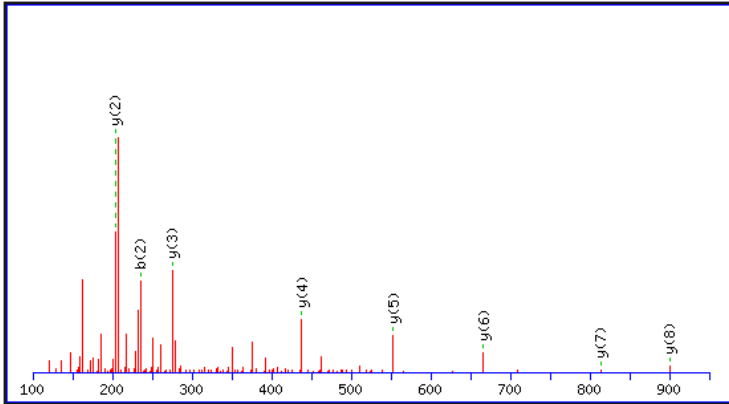

| # | <b>b</b>      | <b>b<sup>++</sup></b> | <b>b<sup>0</sup></b> | <b>b<sup>0++</sup></b> | <b>Seq.</b> | <b>y</b>      | <b>y<sup>++</sup></b> | <b>y<sup>*</sup></b> | <b>y<sup>***</sup></b> | <b>y<sup>0</sup></b> | <b>y<sup>0++</sup></b> | # |
|---|---------------|-----------------------|----------------------|------------------------|-------------|---------------|-----------------------|----------------------|------------------------|----------------------|------------------------|---|
| 1 | 148.08        | 74.54                 |                      |                        | <b>F</b>    |               |                       |                      |                        |                      |                        | 9 |
| 2 | <b>235.11</b> | 118.06                | 217.10               | 109.05                 | <b>S</b>    | <b>900.45</b> | 450.73                | 883.42               | 442.21                 | 882.44               | 441.72                 | 8 |
| 3 | 382.18        | 191.59                | 364.17               | 182.59                 | <b>F</b>    | <b>813.41</b> | 407.21                | 796.39               | 398.70                 | 795.40               | 398.21                 | 7 |
| 4 | 495.26        | 248.13                | 477.25               | 239.13                 | <b>L</b>    | <b>666.35</b> | 333.68                | 649.32               | 325.16                 | 648.34               | 324.67                 | 6 |
| 5 | 610.29        | 305.65                | 592.28               | 296.64                 | <b>D</b>    | <b>553.26</b> | 277.13                | 536.24               | 268.62                 | 535.25               | 268.13                 | 5 |
| 6 | 773.35        | 387.18                | 755.34               | 378.17                 | <b>Y</b>    | <b>438.23</b> | 219.62                | 421.21               | 211.11                 |                      |                        | 4 |
| 7 | 844.39        | 422.70                | 826.38               | 413.69                 | <b>A</b>    | <b>275.17</b> | 138.09                | 258.14               | 129.58                 |                      |                        | 3 |
| 8 | 901.41        | 451.21                | 883.40               | 442.20                 | <b>G</b>    | <b>204.13</b> | 102.57                | 187.11               | 94.06                  |                      |                        | 2 |
| 9 |               |                       |                      |                        | <b>K</b>    | 147.11        | 74.06                 | 130.09               | 65.55                  |                      |                        | 1 |

MS/MS Fragmentation of ID1101 **ISLTLGDAQGR**

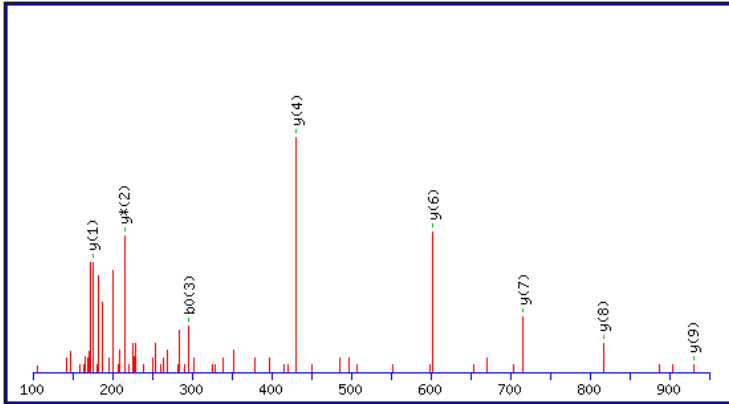

| #         | <b>b</b> | <b>b<sup>++</sup></b> | <b>b<sup>*</sup></b> | <b>b<sup>*++</sup></b> | <b>b<sup>0</sup></b> | <b>b<sup>0++</sup></b> | Seq.     | <b>y</b>      | <b>y<sup>++</sup></b> | <b>y<sup>*</sup></b> | <b>y<sup>*++</sup></b> | <b>y<sup>0</sup></b> | <b>y<sup>0++</sup></b> | #         |
|-----------|----------|-----------------------|----------------------|------------------------|----------------------|------------------------|----------|---------------|-----------------------|----------------------|------------------------|----------------------|------------------------|-----------|
| <b>1</b>  | 114.09   | 57.55                 |                      |                        |                      |                        | <b>I</b> |               |                       |                      |                        |                      |                        | <b>11</b> |
| <b>2</b>  | 201.12   | 101.07                |                      |                        | 183.11               | 92.06                  | <b>S</b> | 1017.53       | 509.27                | 1000.51              | 500.76                 | 999.52               | 500.26                 | <b>10</b> |
| <b>3</b>  | 314.21   | 157.61                |                      |                        | <b>296.20</b>        | 148.60                 | <b>L</b> | <b>930.50</b> | 465.75                | 913.47               | 457.24                 | 912.49               | 456.75                 | <b>9</b>  |
| <b>4</b>  | 415.26   | 208.13                |                      |                        | 397.24               | 199.13                 | <b>T</b> | <b>817.42</b> | 409.21                | 800.39               | 400.70                 | 799.41               | 400.21                 | <b>8</b>  |
| <b>5</b>  | 528.34   | 264.67                |                      |                        | 510.33               | 255.67                 | <b>L</b> | <b>716.37</b> | 358.69                | 699.34               | 350.17                 | 698.36               | 349.68                 | <b>7</b>  |
| <b>6</b>  | 585.36   | 293.18                |                      |                        | 567.35               | 284.18                 | <b>G</b> | <b>603.28</b> | 302.15                | 586.26               | 293.63                 | 585.27               | 293.14                 | <b>6</b>  |
| <b>7</b>  | 700.39   | 350.70                |                      |                        | 682.38               | 341.69                 | <b>D</b> | 546.26        | 273.64                | 529.24               | 265.12                 | 528.25               | 264.63                 | <b>5</b>  |
| <b>8</b>  | 771.42   | 386.22                |                      |                        | 753.41               | 377.21                 | <b>A</b> | <b>431.24</b> | 216.12                | 414.21               | 207.61                 |                      |                        | <b>4</b>  |
| <b>9</b>  | 899.48   | 450.25                | 882.46               | 441.73                 | 881.47               | 441.24                 | <b>Q</b> | 360.20        | 180.60                | 343.17               | 172.09                 |                      |                        | <b>3</b>  |
| <b>10</b> | 956.50   | 478.76                | 939.48               | 470.24                 | 938.49               | 469.75                 | <b>G</b> | 232.14        | 116.57                | <b>215.11</b>        | 108.06                 |                      |                        | <b>2</b>  |
| <b>11</b> |          |                       |                      |                        |                      |                        | <b>R</b> | <b>175.12</b> | 88.06                 | 158.09               | 79.55                  |                      |                        | <b>1</b>  |



MS/MS Fragmentation of ID1103 **LSSAIATILESK**

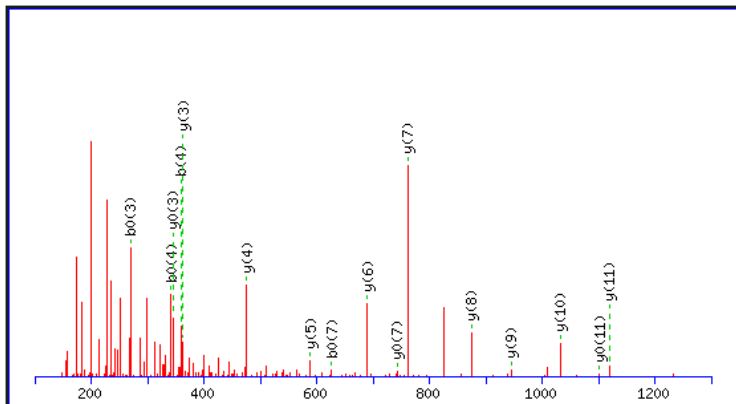

| #         | b             | b <sup>++</sup> | b <sup>0</sup> | b <sup>0++</sup> | Seq.     | y              | y <sup>++</sup> | y <sup>*</sup> | y <sup>*++</sup> | y <sup>0</sup> | y <sup>0++</sup> | #         |
|-----------|---------------|-----------------|----------------|------------------|----------|----------------|-----------------|----------------|------------------|----------------|------------------|-----------|
| <b>1</b>  | 114.09        | 57.55           |                |                  | <b>L</b> |                |                 |                |                  |                |                  | <b>12</b> |
| <b>2</b>  | 201.12        | 101.07          | 183.11         | 92.06            | <b>S</b> | <b>1119.63</b> | 560.32          | 1102.60        | 551.80           | <b>1101.61</b> | 551.31           | <b>11</b> |
| <b>3</b>  | 288.16        | 144.58          | <b>270.14</b>  | 135.58           | <b>S</b> | <b>1032.59</b> | 516.80          | 1015.57        | 508.29           | 1014.58        | 507.80           | <b>10</b> |
| <b>4</b>  | <b>359.19</b> | 180.10          | <b>341.18</b>  | 171.09           | <b>A</b> | <b>945.56</b>  | 473.28          | 928.53         | 464.77           | 927.55         | 464.28           | <b>9</b>  |
| <b>5</b>  | 472.28        | 236.64          | 454.27         | 227.64           | <b>I</b> | <b>874.52</b>  | 437.77          | 857.50         | 429.25           | 856.51         | 428.76           | <b>8</b>  |
| <b>6</b>  | 543.31        | 272.16          | 525.30         | 263.16           | <b>A</b> | <b>761.44</b>  | 381.22          | 744.41         | 372.71           | <b>743.43</b>  | 372.22           | <b>7</b>  |
| <b>7</b>  | 644.36        | 322.68          | <b>626.35</b>  | 313.68           | <b>T</b> | <b>690.40</b>  | 345.71          | 673.38         | 337.19           | 672.39         | 336.70           | <b>6</b>  |
| <b>8</b>  | 757.45        | 379.23          | 739.43         | 370.22           | <b>I</b> | <b>589.36</b>  | 295.18          | 572.33         | 286.67           | 571.34         | 286.18           | <b>5</b>  |
| <b>9</b>  | 870.53        | 435.77          | 852.52         | 426.76           | <b>L</b> | <b>476.27</b>  | 238.64          | 459.24         | 230.13           | 458.26         | 229.63           | <b>4</b>  |
| <b>10</b> | 999.57        | 500.29          | 981.56         | 491.28           | <b>E</b> | <b>363.19</b>  | 182.10          | 346.16         | 173.58           | <b>345.18</b>  | 173.09           | <b>3</b>  |
| <b>11</b> | 1086.60       | 543.81          | 1068.59        | 534.80           | <b>S</b> | 234.14         | 117.58          | 217.12         | 109.06           | 216.13         | 108.57           | <b>2</b>  |
| <b>12</b> |               |                 |                |                  | <b>K</b> | 147.11         | 74.06           | 130.09         | 65.55            |                |                  | <b>1</b>  |

MS/MS Fragmentation of ID1107 **DGILLELDR**

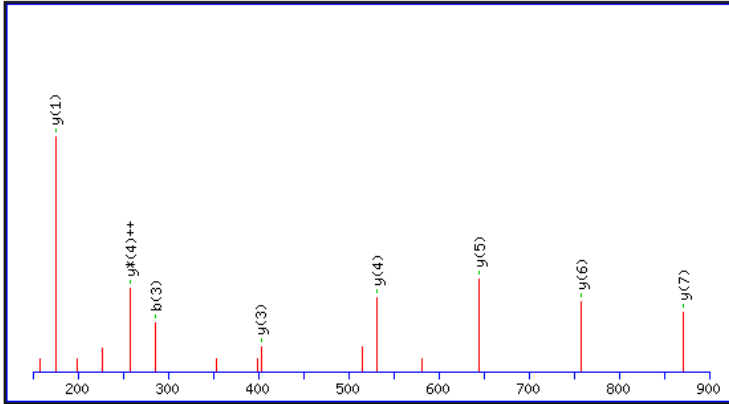

| #         | <b>b</b>      | <b>b<sup>++</sup></b> | <b>b<sup>0</sup></b> | <b>b<sup>0++</sup></b> | Seq.     | <b>y</b>      | <b>y<sup>++</sup></b> | <b>y<sup>*</sup></b> | <b>y<sup>*++</sup></b> | <b>y<sup>0</sup></b> | <b>y<sup>0++</sup></b> | #         |
|-----------|---------------|-----------------------|----------------------|------------------------|----------|---------------|-----------------------|----------------------|------------------------|----------------------|------------------------|-----------|
| <b>1</b>  | 116.03        | 58.52                 | 98.02                | 49.52                  | <b>D</b> |               |                       |                      |                        |                      |                        | <b>10</b> |
| <b>2</b>  | 173.06        | 87.03                 | 155.05               | 78.03                  | <b>G</b> | 1041.63       | 521.32                | 1024.60              | 512.81                 | 1023.62              | 512.31                 | <b>9</b>  |
| <b>3</b>  | <b>286.14</b> | 143.57                | 268.13               | 134.57                 | <b>I</b> | 984.61        | 492.81                | 967.58               | 484.29                 | 966.60               | 483.80                 | <b>8</b>  |
| <b>4</b>  | 399.22        | 200.12                | 381.21               | 191.11                 | <b>L</b> | <b>871.52</b> | 436.27                | 854.50               | 427.75                 | 853.51               | 427.26                 | <b>7</b>  |
| <b>5</b>  | 512.31        | 256.66                | 494.30               | 247.65                 | <b>L</b> | <b>758.44</b> | 379.72                | 741.41               | 371.21                 | 740.43               | 370.72                 | <b>6</b>  |
| <b>6</b>  | 625.39        | 313.20                | 607.38               | 304.19                 | <b>L</b> | <b>645.36</b> | 323.18                | 628.33               | 314.67                 | 627.35               | 314.18                 | <b>5</b>  |
| <b>7</b>  | 754.43        | 377.72                | 736.42               | 368.72                 | <b>E</b> | <b>532.27</b> | 266.64                | 515.25               | <b>258.13</b>          | 514.26               | 257.63                 | <b>4</b>  |
| <b>8</b>  | 867.52        | 434.26                | 849.51               | 425.26                 | <b>L</b> | <b>403.23</b> | 202.12                | 386.20               | 193.61                 | 385.22               | 193.11                 | <b>3</b>  |
| <b>9</b>  | 982.55        | 491.78                | 964.53               | 482.77                 | <b>D</b> | 290.15        | 145.58                | 273.12               | 137.06                 | 272.14               | 136.57                 | <b>2</b>  |
| <b>10</b> |               |                       |                      |                        | <b>R</b> | <b>175.12</b> | 88.06                 | 158.09               | 79.55                  |                      |                        | <b>1</b>  |

MS/MS Fragmentation of ID1109 **LVSEVDLVK**

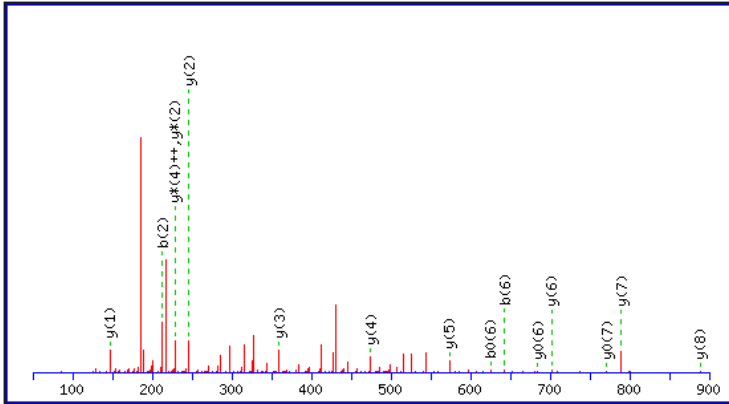

| # | <b>b</b>      | <b>b<sup>++</sup></b> | <b>b<sup>0</sup></b> | <b>b<sup>0++</sup></b> | Seq. | <b>y</b>      | <b>y<sup>++</sup></b> | <b>y<sup>*</sup></b> | <b>y<sup>*++</sup></b> | <b>y<sup>0</sup></b> | <b>y<sup>0++</sup></b> | # |
|---|---------------|-----------------------|----------------------|------------------------|------|---------------|-----------------------|----------------------|------------------------|----------------------|------------------------|---|
| 1 | 114.09        | 57.55                 |                      |                        | L    |               |                       |                      |                        |                      |                        | 9 |
| 2 | <b>213.16</b> | 107.08                |                      |                        | V    | <b>888.50</b> | 444.76                | 871.48               | 436.24                 | 870.49               | 435.75                 | 8 |
| 3 | 300.19        | 150.60                | 282.18               | 141.59                 | S    | <b>789.44</b> | 395.22                | 772.41               | 386.71                 | <b>771.42</b>        | 386.22                 | 7 |
| 4 | 429.23        | 215.12                | 411.22               | 206.12                 | E    | <b>702.40</b> | 351.71                | 685.38               | 343.19                 | <b>684.39</b>        | 342.70                 | 6 |
| 5 | 528.30        | 264.66                | 510.29               | 255.65                 | V    | <b>573.36</b> | 287.18                | 556.33               | 278.67                 | 555.35               | 278.18                 | 5 |
| 6 | <b>643.33</b> | 322.17                | <b>625.32</b>        | 313.16                 | D    | <b>474.29</b> | 237.65                | 457.27               | <b>229.14</b>          | 456.28               | 228.64                 | 4 |
| 7 | 756.41        | 378.71                | 738.40               | 369.71                 | L    | <b>359.27</b> | 180.14                | 342.24               | 171.62                 |                      |                        | 3 |
| 8 | 855.48        | 428.24                | 837.47               | 419.24                 | V    | <b>246.18</b> | 123.59                | <b>229.15</b>        | 115.08                 |                      |                        | 2 |
| 9 |               |                       |                      |                        | K    | <b>147.11</b> | 74.06                 | 130.09               | 65.55                  |                      |                        | 1 |

MS/MS Fragmentation of ID11111 **MIEVVLNDR**

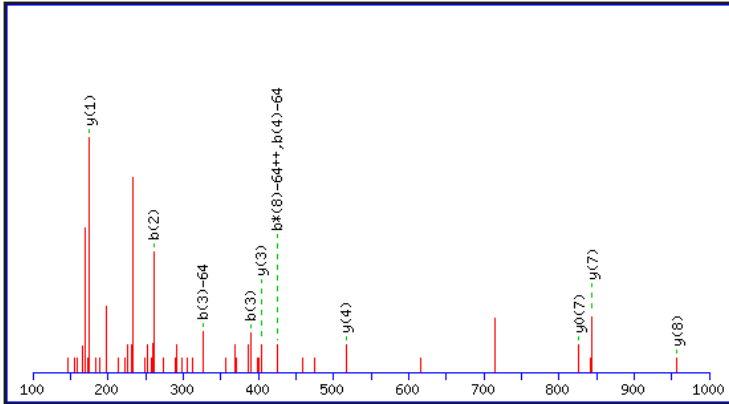

| #        | <b>b</b>      | <b>b<sup>++</sup></b> | <b>b<sup>*</sup></b> | <b>b<sup>*++</sup></b> | <b>b<sup>0</sup></b> | <b>b<sup>0++</sup></b> | Seq.     | <b>y</b>      | <b>y<sup>++</sup></b> | <b>y<sup>*</sup></b> | <b>y<sup>*++</sup></b> | <b>y<sup>0</sup></b> | <b>y<sup>0++</sup></b> | #        |
|----------|---------------|-----------------------|----------------------|------------------------|----------------------|------------------------|----------|---------------|-----------------------|----------------------|------------------------|----------------------|------------------------|----------|
| <b>1</b> | 84.04         | 42.53                 |                      |                        |                      |                        | <b>M</b> |               |                       |                      |                        |                      |                        | <b>9</b> |
| <b>2</b> | 197.13        | 99.07                 |                      |                        |                      |                        | <b>I</b> | <b>957.54</b> | 479.27                | 940.51               | 470.76                 | 939.53               | 470.27                 | <b>8</b> |
| <b>3</b> | <b>326.17</b> | 163.59                |                      |                        | 308.16               | 154.58                 | <b>E</b> | <b>844.45</b> | 422.73                | 827.43               | 414.22                 | <b>826.44</b>        | 413.72                 | <b>7</b> |
| <b>4</b> | <b>425.24</b> | 213.12                |                      |                        | 407.23               | 204.12                 | <b>V</b> | 715.41        | 358.21                | 698.38               | 349.70                 | 697.40               | 349.20                 | <b>6</b> |
| <b>5</b> | 524.31        | 262.66                |                      |                        | 506.30               | 253.65                 | <b>V</b> | 616.34        | 308.67                | 599.31               | 300.16                 | 598.33               | 299.67                 | <b>5</b> |
| <b>6</b> | 637.39        | 319.20                |                      |                        | 619.38               | 310.19                 | <b>L</b> | <b>517.27</b> | 259.14                | 500.25               | 250.63                 | 499.26               | 250.13                 | <b>4</b> |
| <b>7</b> | 751.43        | 376.22                | 734.41               | 367.71                 | 733.42               | 367.22                 | <b>N</b> | <b>404.19</b> | 202.60                | 387.16               | 194.08                 | 386.18               | 193.59                 | <b>3</b> |
| <b>8</b> | 866.46        | 433.73                | 849.44               | <b>425.22</b>          | 848.45               | 424.73                 | <b>D</b> | 290.15        | 145.58                | 273.12               | 137.06                 | 272.14               | 136.57                 | <b>2</b> |
| <b>9</b> |               |                       |                      |                        |                      |                        | <b>R</b> | <b>175.12</b> | 88.06                 | 158.09               | 79.55                  |                      |                        | <b>1</b> |

MS/MS Fragmentation of ID1117 **EFIVFVGR**

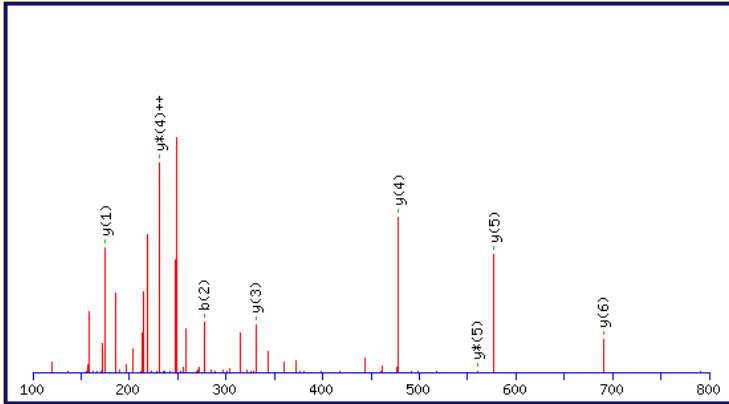

| # | <b>b</b>      | <b>b<sup>++</sup></b> | <b>b<sup>0</sup></b> | <b>b<sup>0++</sup></b> | Seq.     | <b>y</b>      | <b>y<sup>++</sup></b> | <b>y*</b>     | <b>y<sup>*++</sup></b> | #        |
|---|---------------|-----------------------|----------------------|------------------------|----------|---------------|-----------------------|---------------|------------------------|----------|
| 1 | 130.05        | 65.53                 | 112.04               | 56.52                  | <b>E</b> |               |                       |               |                        | <b>8</b> |
| 2 | <b>277.12</b> | 139.06                | 259.11               | 130.06                 | <b>F</b> | 837.50        | 419.25                | 820.47        | 410.74                 | <b>7</b> |
| 3 | 390.20        | 195.60                | 372.19               | 186.60                 | <b>I</b> | <b>690.43</b> | 345.72                | 673.40        | 337.21                 | <b>6</b> |
| 4 | 489.27        | 245.14                | 471.26               | 236.13                 | <b>V</b> | <b>577.35</b> | 289.18                | <b>560.32</b> | 280.66                 | <b>5</b> |
| 5 | 636.34        | 318.67                | 618.33               | 309.67                 | <b>F</b> | <b>478.28</b> | 239.64                | 461.25        | <b>231.13</b>          | <b>4</b> |
| 6 | 735.41        | 368.21                | 717.40               | 359.20                 | <b>V</b> | <b>331.21</b> | 166.11                | 314.18        | 157.59                 | <b>3</b> |
| 7 | 792.43        | 396.72                | 774.42               | 387.71                 | <b>G</b> | 232.14        | 116.57                | 215.11        | 108.06                 | <b>2</b> |
| 8 |               |                       |                      |                        | <b>R</b> | <b>175.12</b> | 88.06                 | 158.09        | 79.55                  | <b>1</b> |

MS/MS Fragmentation of ID1120 **ALVLAMEIR**

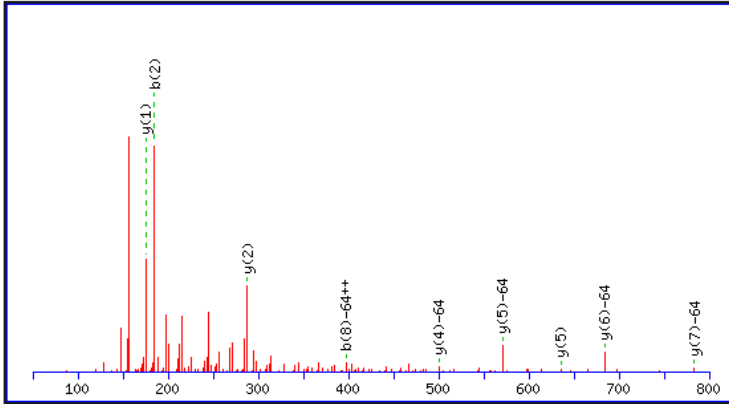

| # | b             | b <sup>++</sup> | b <sup>0</sup> | b <sup>0++</sup> | Seq. | y             | y <sup>++</sup> | y*     | y <sup>+++</sup> | y <sup>0</sup> | y <sup>0++</sup> | # |
|---|---------------|-----------------|----------------|------------------|------|---------------|-----------------|--------|------------------|----------------|------------------|---|
| 1 | 72.04         | 36.53           |                |                  | A    |               |                 |        |                  |                |                  | 9 |
| 2 | <b>185.13</b> | 93.07           |                |                  | L    | 896.56        | 448.78          | 879.53 | 440.27           | 878.55         | 439.78           | 8 |
| 3 | 284.20        | 142.60          |                |                  | V    | <b>783.47</b> | 392.24          | 766.45 | 383.73           | 765.46         | 383.23           | 7 |
| 4 | 397.28        | 199.14          |                |                  | L    | <b>684.40</b> | 342.71          | 667.38 | 334.19           | 666.39         | 333.70           | 6 |
| 5 | 468.32        | 234.66          |                |                  | A    | <b>571.32</b> | 286.16          | 554.29 | 277.65           | 553.31         | 277.16           | 5 |
| 6 | 551.36        | 276.18          |                |                  | M    | <b>500.28</b> | 250.65          | 483.26 | 242.13           | 482.27         | 241.64           | 4 |
| 7 | 680.40        | 340.70          | 662.39         | 331.70           | E    | 417.25        | 209.13          | 400.22 | 200.61           | 399.24         | 200.12           | 3 |
| 8 | 793.48        | <b>397.24</b>   | 775.47         | 388.24           | I    | <b>288.20</b> | 144.61          | 271.18 | 136.09           |                |                  | 2 |
| 9 |               |                 |                |                  | R    | <b>175.12</b> | 88.06           | 158.09 | 79.55            |                |                  | 1 |

MS/MS Fragmentation of ID1121 **MLDNR**

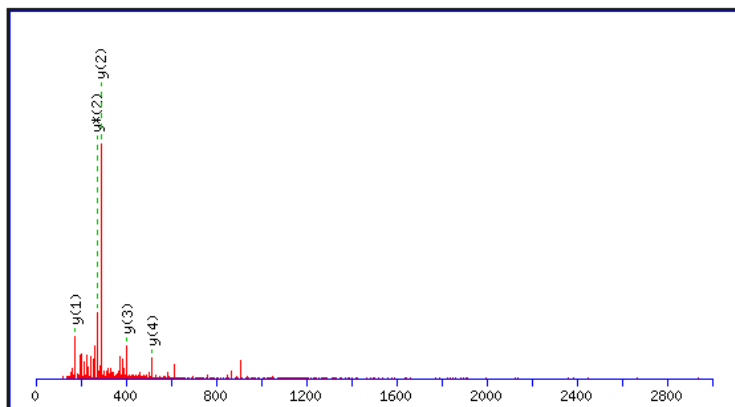

| # | b      | b*     | b <sup>0</sup> | Seq. | y      | y*     | y <sup>0</sup> | # |
|---|--------|--------|----------------|------|--------|--------|----------------|---|
| 1 | 84.04  |        |                | M    |        |        |                | 5 |
| 2 | 197.13 |        |                | L    | 517.27 | 500.25 | 499.26         | 4 |
| 3 | 312.16 |        | 294.14         | D    | 404.19 | 387.16 | 386.18         | 3 |
| 4 | 426.20 | 409.17 | 408.19         | N    | 289.16 | 272.14 |                | 2 |
| 5 |        |        |                | R    | 175.12 | 158.09 |                | 1 |

MS/MS Fragmentation of ID1122 **NLESDLLEELER**

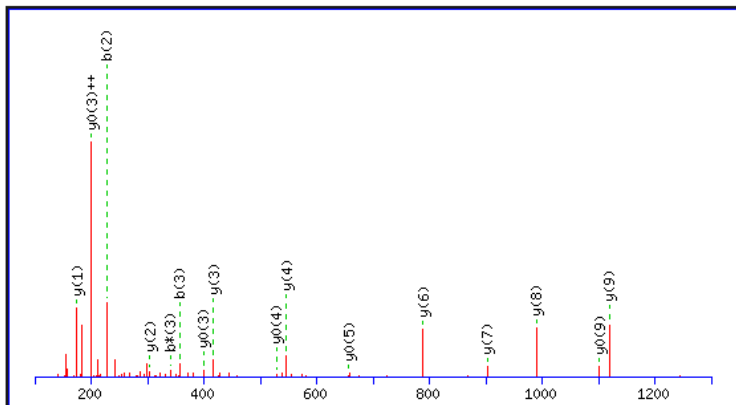

| #         | <b>b</b>      | <b>b<sup>++</sup></b> | <b>b*</b>     | <b>b<sup>*++</sup></b> | <b>b<sup>0</sup></b> | <b>b<sup>0++</sup></b> | Seq.     | <b>y</b>       | <b>y<sup>++</sup></b> | <b>y*</b> | <b>y<sup>*++</sup></b> | <b>y<sup>0</sup></b> | <b>y<sup>0++</sup></b> | #         |
|-----------|---------------|-----------------------|---------------|------------------------|----------------------|------------------------|----------|----------------|-----------------------|-----------|------------------------|----------------------|------------------------|-----------|
| <b>1</b>  | 115.05        | 58.03                 | 98.02         | 49.52                  |                      |                        | <b>N</b> |                |                       |           |                        |                      |                        | <b>11</b> |
| <b>2</b>  | <b>228.13</b> | 114.57                | 211.11        | 106.06                 |                      |                        | <b>L</b> | 1232.60        | 616.80                | 1215.57   | 608.29                 | 1214.59              | 607.80                 | <b>10</b> |
| <b>3</b>  | <b>357.18</b> | 179.09                | <b>340.15</b> | 170.58                 | 339.17               | 170.09                 | <b>E</b> | <b>1119.52</b> | 560.26                | 1102.49   | 551.75                 | <b>1101.51</b>       | 551.26                 | <b>9</b>  |
| <b>4</b>  | 444.21        | 222.61                | 427.18        | 214.09                 | 426.20               | 213.60                 | <b>S</b> | <b>990.47</b>  | 495.74                | 973.45    | 487.23                 | 972.46               | 486.74                 | <b>8</b>  |
| <b>5</b>  | 559.24        | 280.12                | 542.21        | 271.61                 | 541.23               | 271.12                 | <b>D</b> | <b>903.44</b>  | 452.22                | 886.42    | 443.71                 | 885.43               | 443.22                 | <b>7</b>  |
| <b>6</b>  | 672.32        | 336.66                | 655.29        | 328.15                 | 654.31               | 327.66                 | <b>L</b> | <b>788.41</b>  | 394.71                | 771.39    | 386.20                 | 770.40               | 385.71                 | <b>6</b>  |
| <b>7</b>  | 801.36        | 401.18                | 784.34        | 392.67                 | 783.35               | 392.18                 | <b>E</b> | 675.33         | 338.17                | 658.30    | 329.66                 | <b>657.32</b>        | 329.16                 | <b>5</b>  |
| <b>8</b>  | 930.41        | 465.71                | 913.38        | 457.19                 | 912.39               | 456.70                 | <b>E</b> | <b>546.29</b>  | 273.65                | 529.26    | 265.13                 | <b>528.28</b>        | 264.64                 | <b>4</b>  |
| <b>9</b>  | 1043.49       | 522.25                | 1026.46       | 513.73                 | 1025.48              | 513.24                 | <b>L</b> | <b>417.25</b>  | 209.13                | 400.22    | 200.61                 | <b>399.24</b>        | <b>200.12</b>          | <b>3</b>  |
| <b>10</b> | 1172.53       | 586.77                | 1155.51       | 578.26                 | 1154.52              | 577.76                 | <b>E</b> | <b>304.16</b>  | 152.58                | 287.13    | 144.07                 | 286.15               | 143.58                 | <b>2</b>  |
| <b>11</b> |               |                       |               |                        |                      |                        | <b>R</b> | <b>175.12</b>  | 88.06                 | 158.09    | 79.55                  |                      |                        | <b>1</b>  |
